# Supplementary material
Source: PubMed Central journal article supplement (PMC3896054)
Supplement: NIHMS543571-supplement-1.pdf [file NIHMS543571-supplement-1.pdf]

# GPATCH4 GEETVLGGGTR

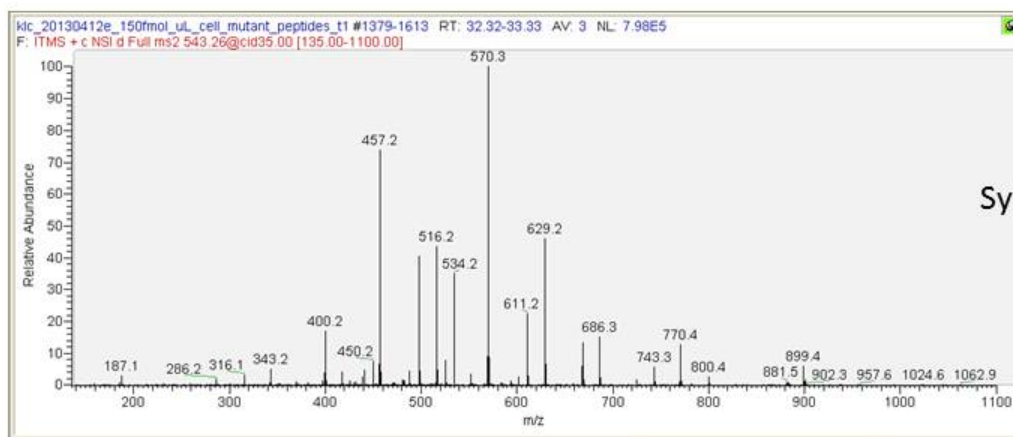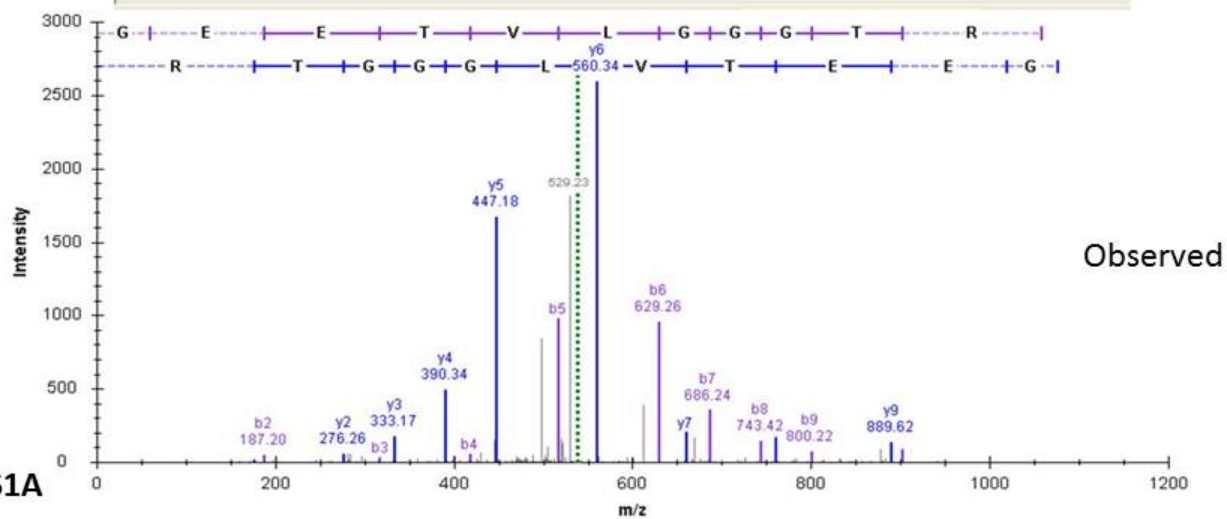

Figure S1A

# CCT8 FAEAFEDIPR A447D

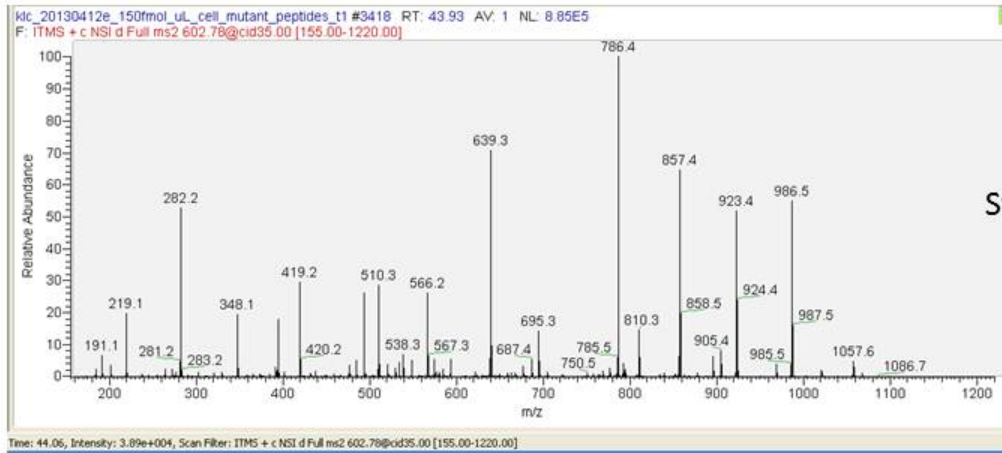

Synthetic

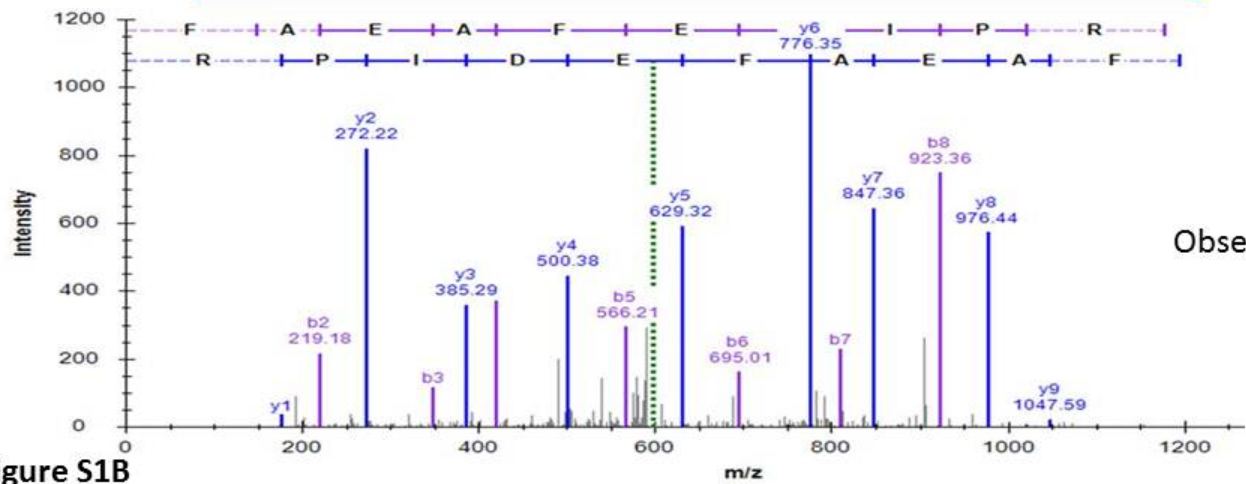

Observed

Figure S1B



# SRFS9 DLEDLFFK Y35F

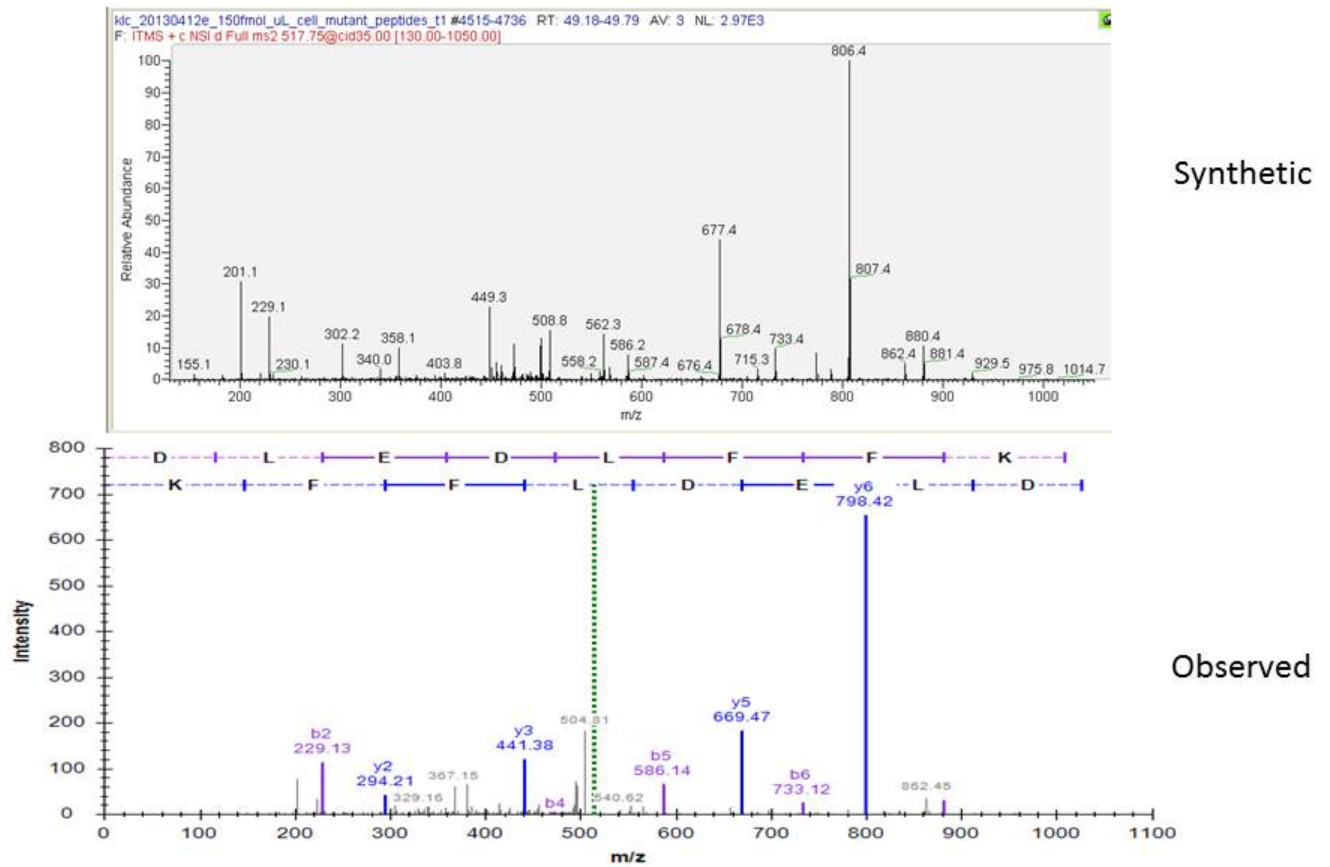

Figure S1D

# CEACAM1 SDLVNEEATGQFR

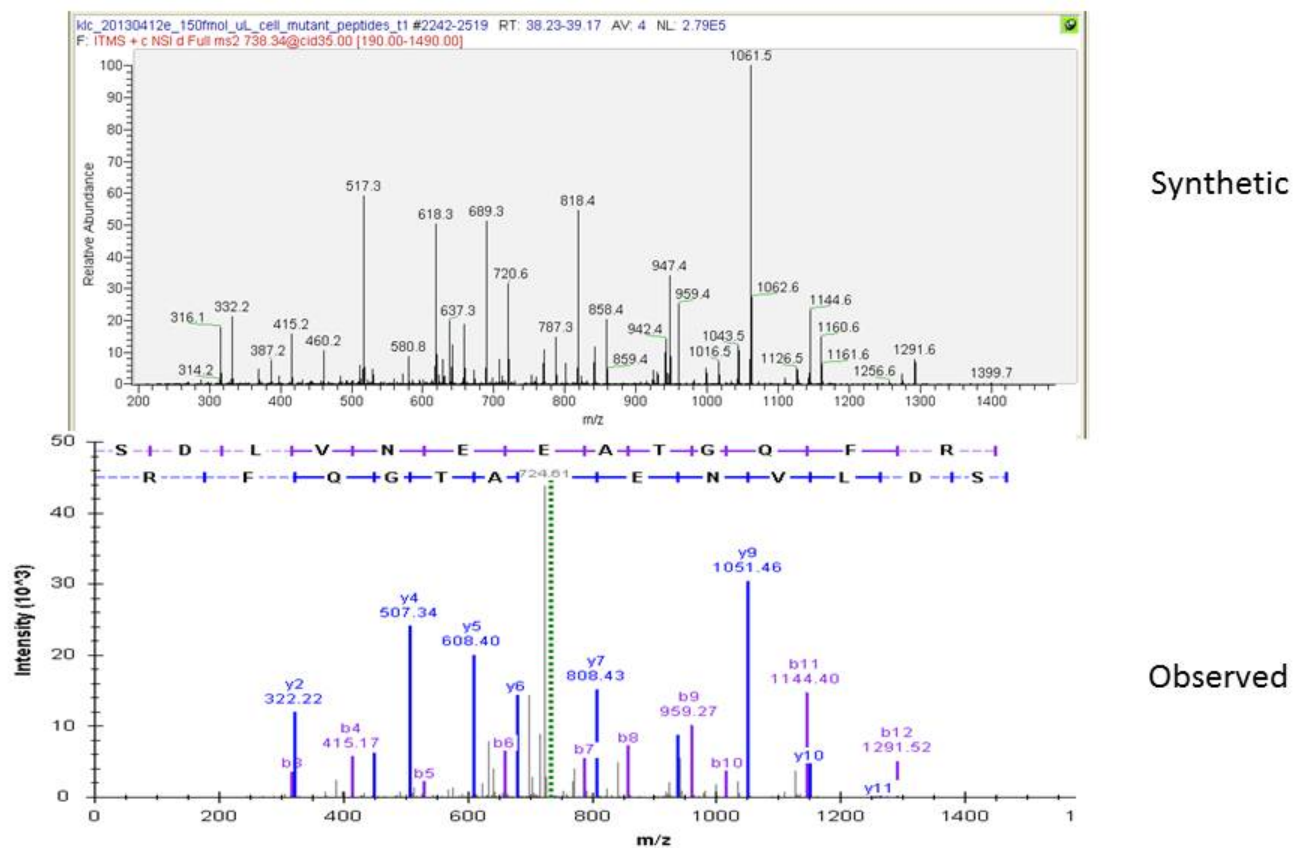

Figure S1E

# EPB41L1 DYSEADGLLER S13L

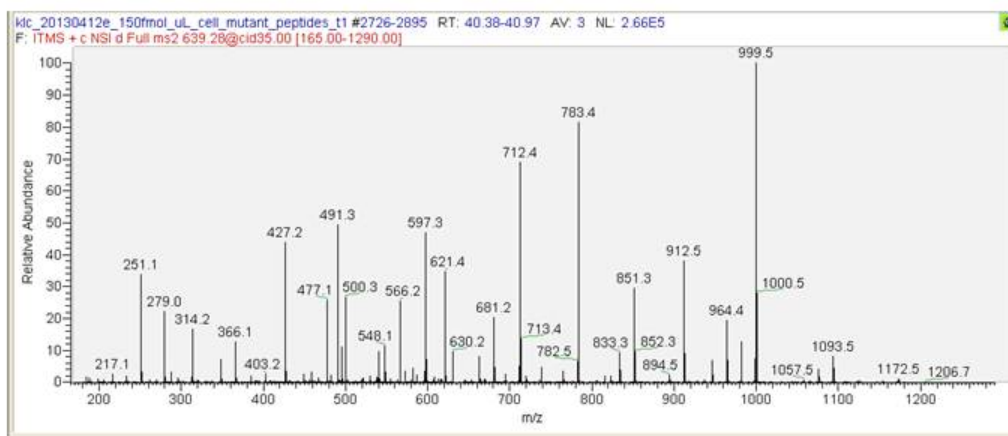

Synthetic

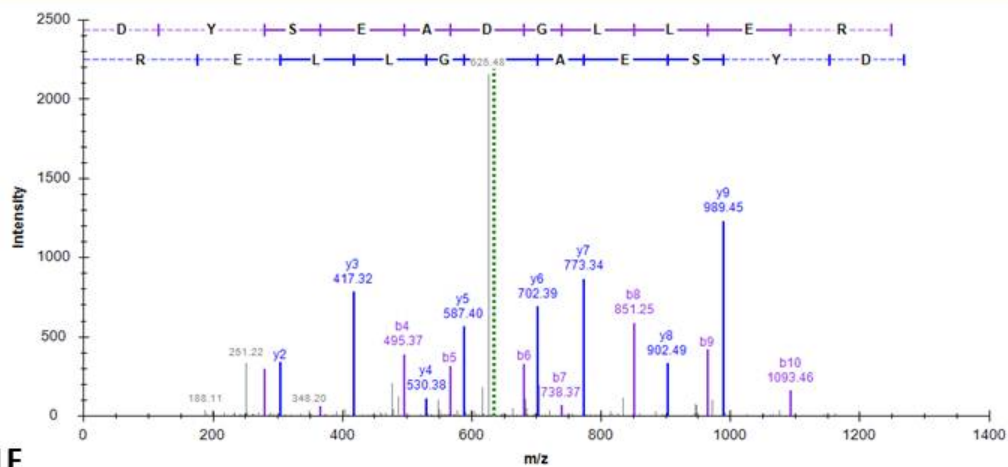

Observed

Figure S1F

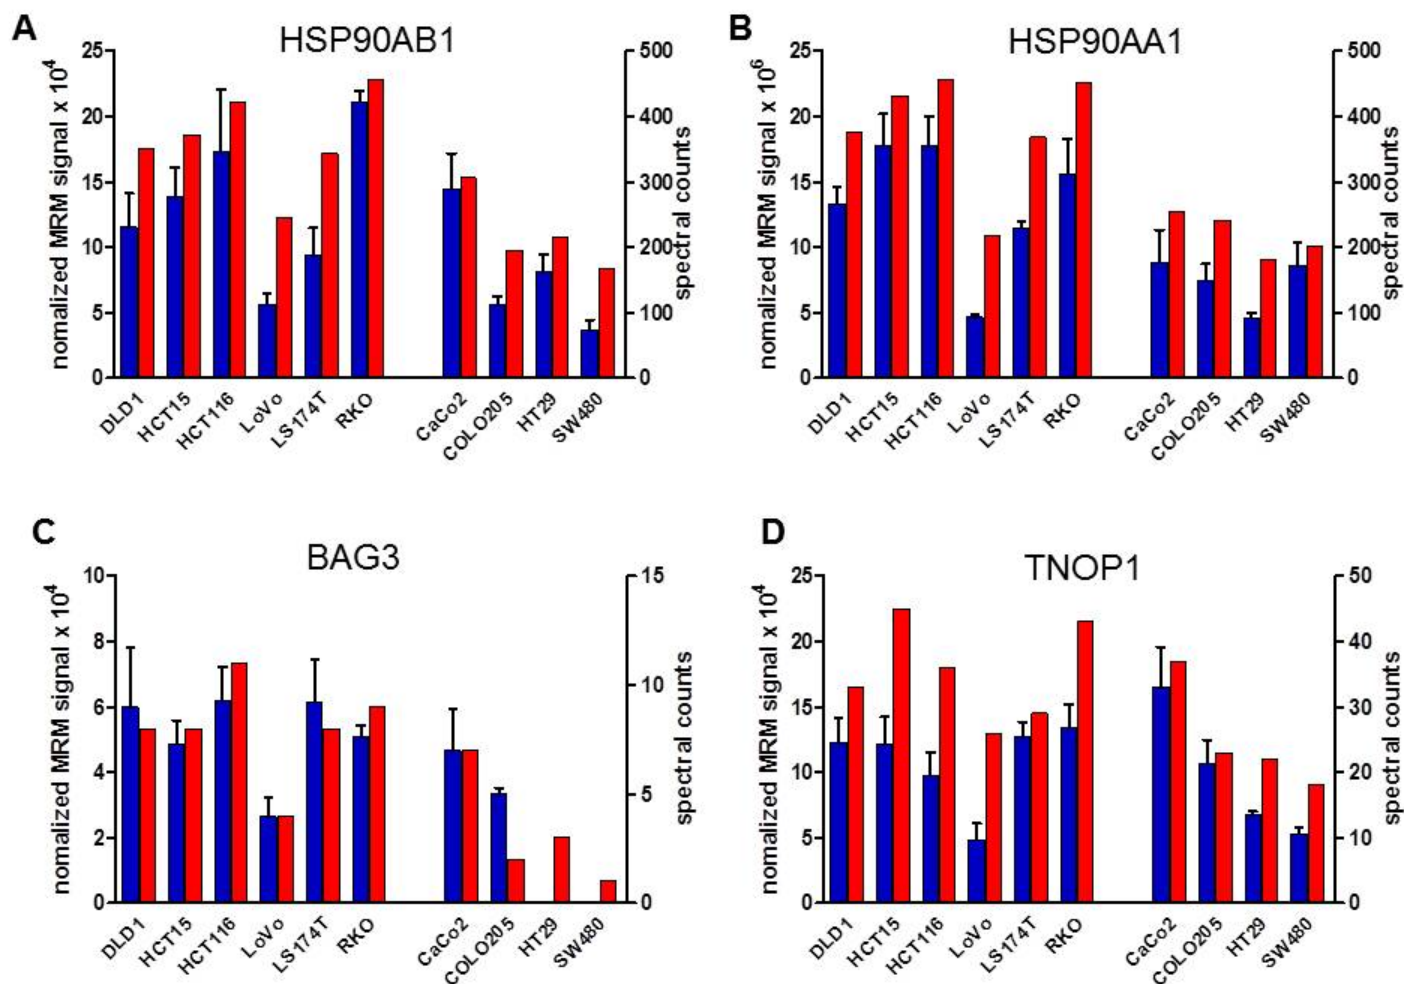

Figure S2

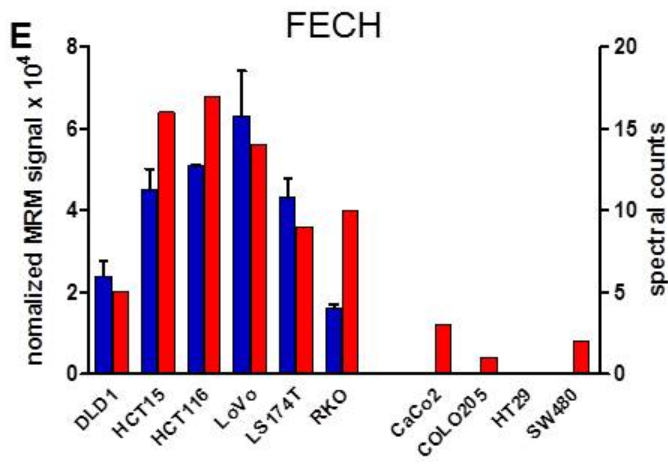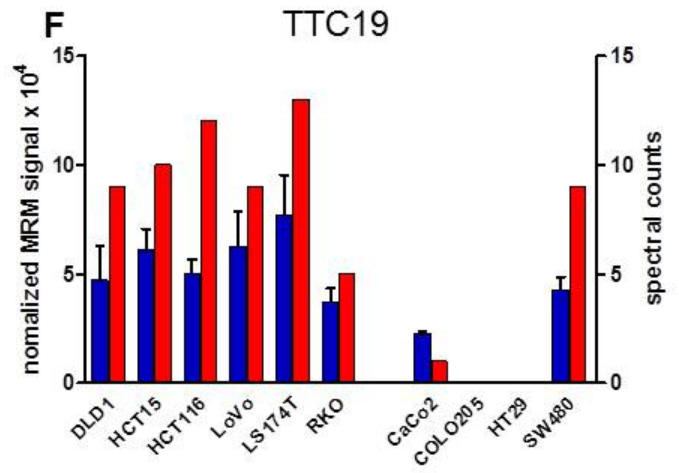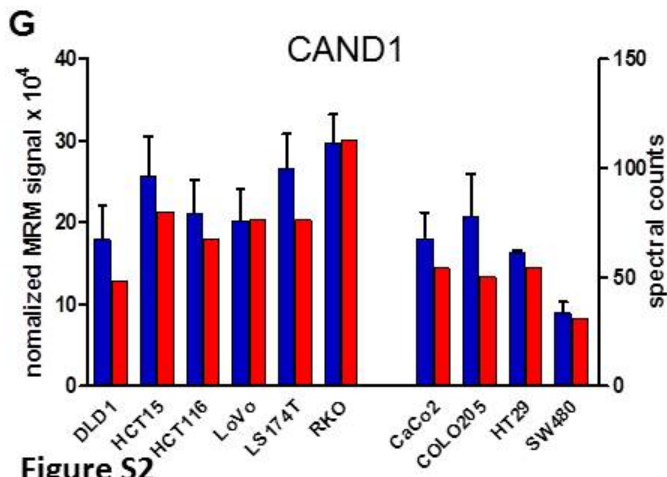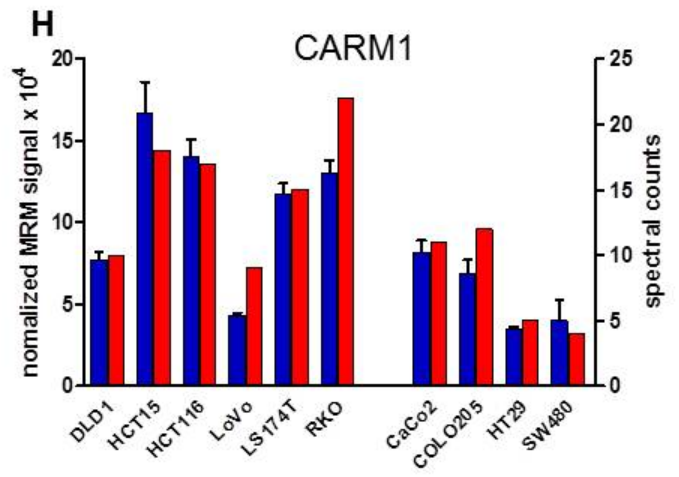

Figure S2



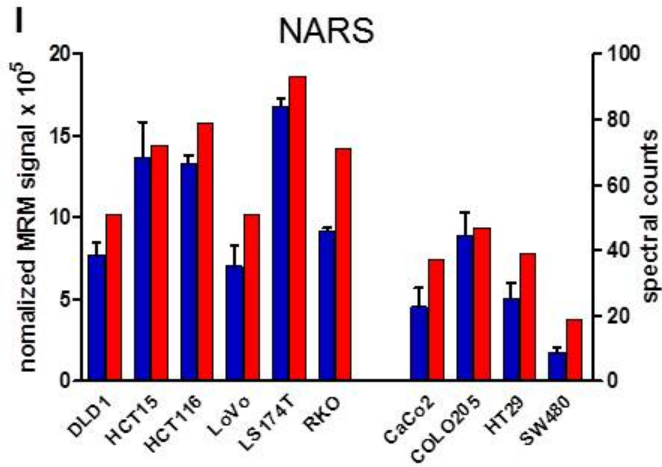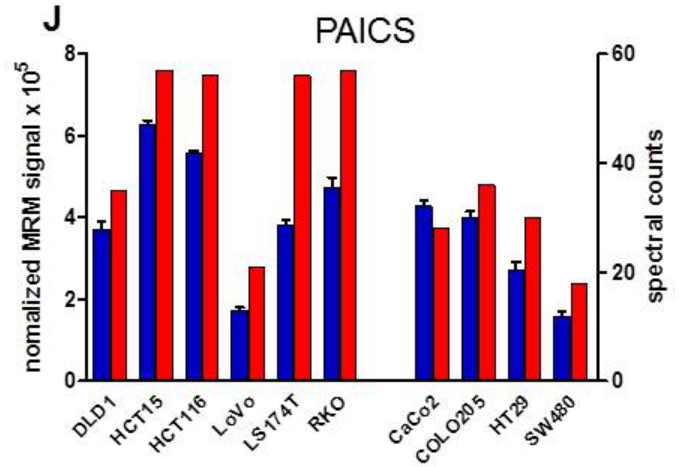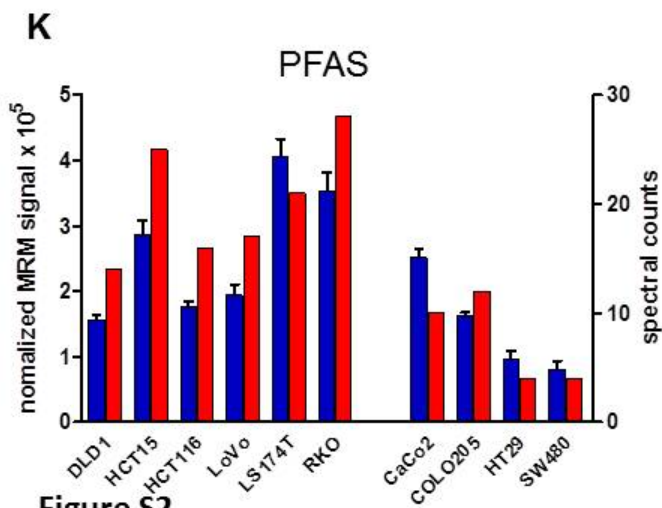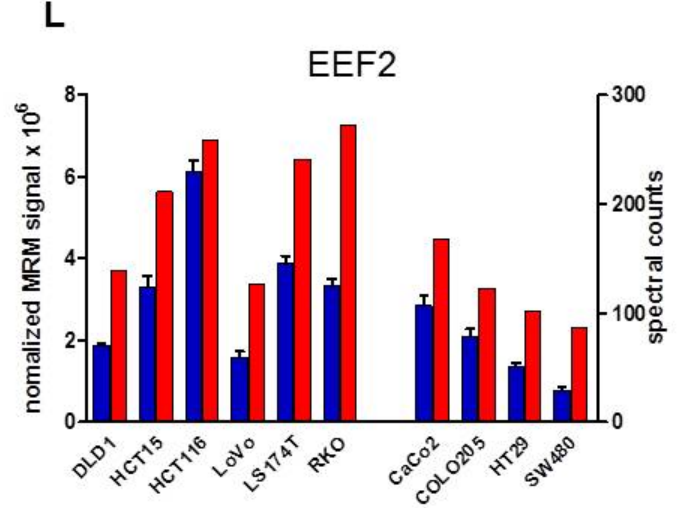

**Figure S2**

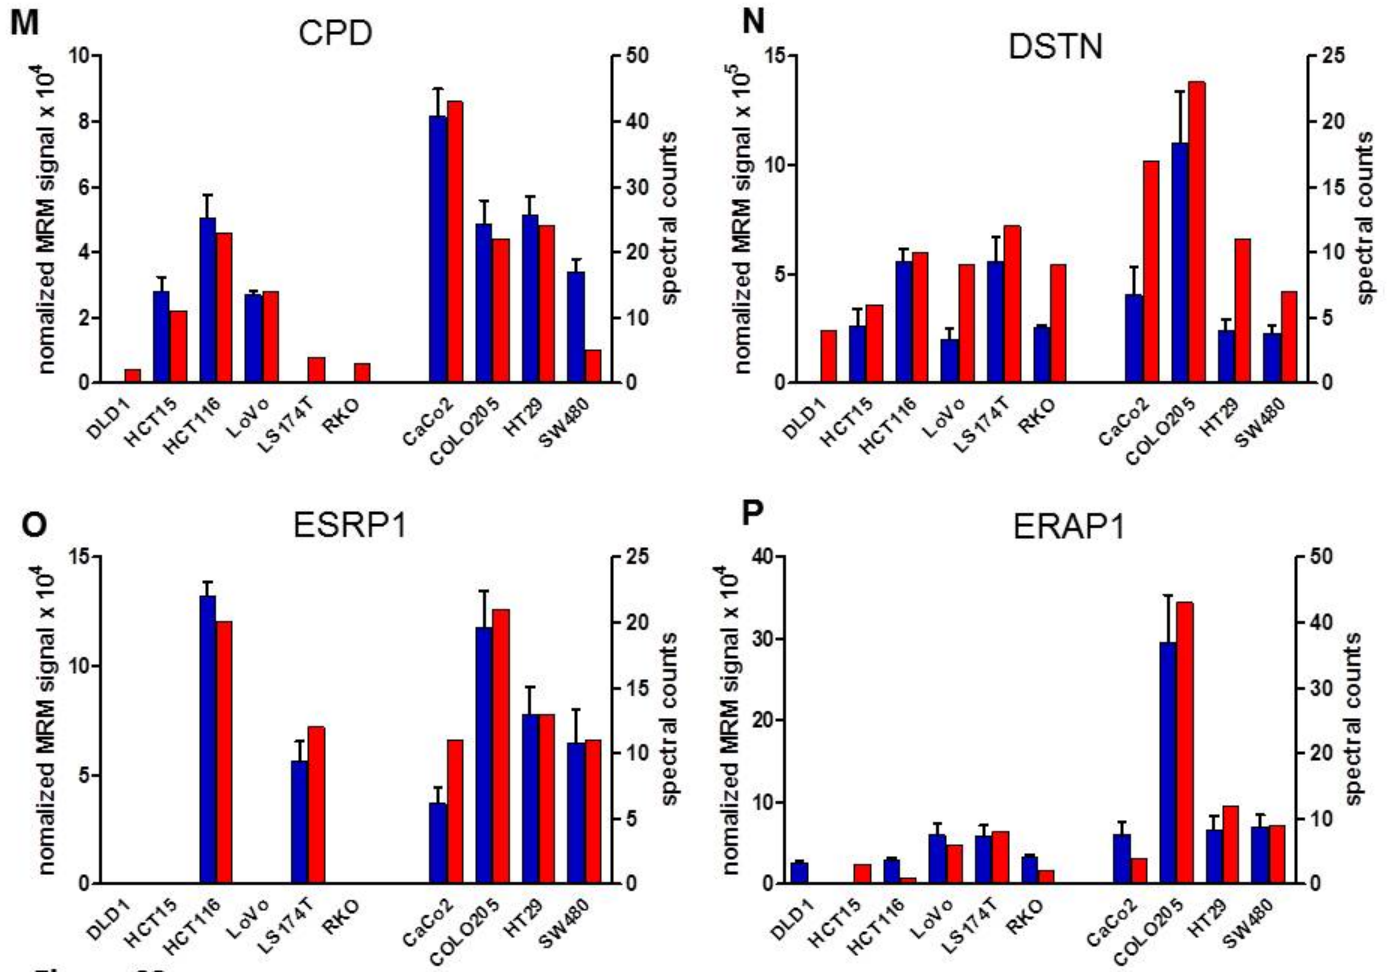

Figure S2

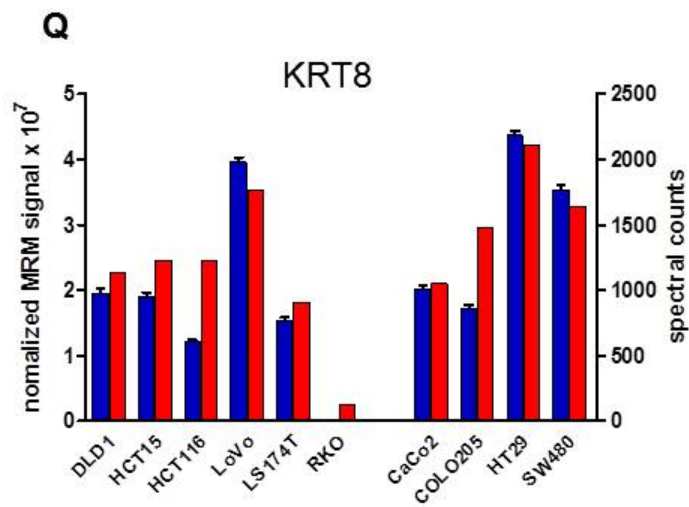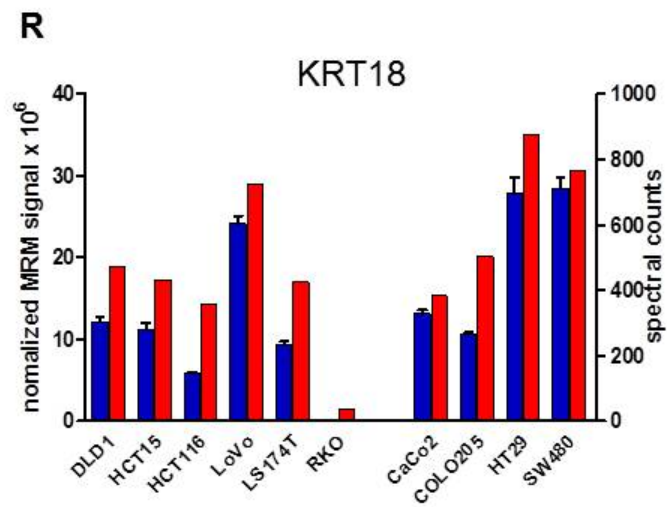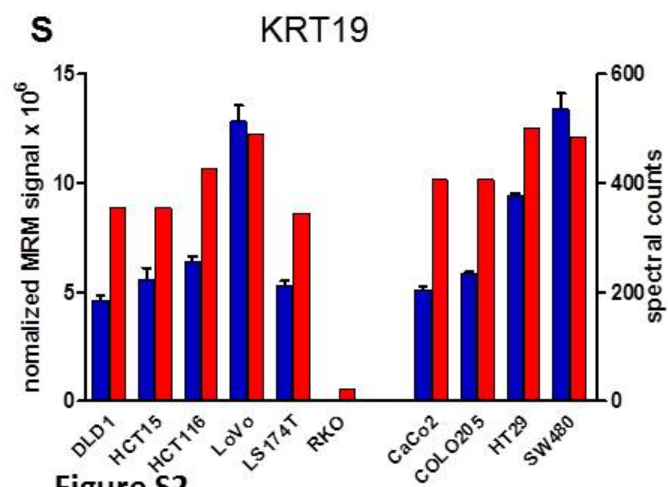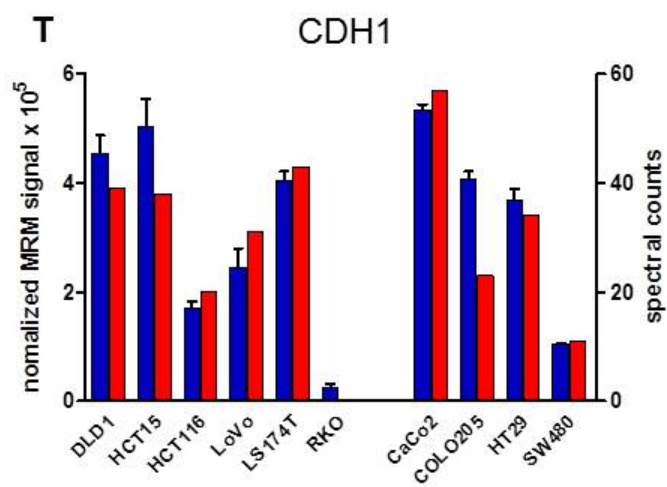

Figure S2
