# Supplementary material
Source: PubMed Central journal article supplement (PMC3896054)
Supplement: NIHMS543571-supplement-2.pdf [file NIHMS543571-supplement-2.pdf]

**Table S1.** Genetic characteristics of cell lines

| HGNC Gene Symbol | MMR- Cell Lines |              |                          |                       |                   |                    | MMR+ Cell Lines |             |                  |        |
|------------------|-----------------|--------------|--------------------------|-----------------------|-------------------|--------------------|-----------------|-------------|------------------|--------|
|                  | HCT116          | LS174T       | RKO                      | HCT15*                | DLD1*             | LOVO               | CACO2           | COLO205     | HT29             | SW480  |
| MLH1             | S252*           | T117M        | methyalted<br>methyalted | WT                    | WT                | WT                 | WT              | WT          | WT               | WT     |
| MSH2             | WT              | WT           | WT                       | WT                    | WT                | ΔEx3-8             | WT              | WT          | WT               | WT     |
| MSH6             | WT              | WT           | WT                       | L290fs<br>D1171fs     | L290fs<br>D1171fs | WT                 | WT              | WT          | WT               | WT     |
| KRAS             | G13D<br>WT      | G12D<br>WT   | WT                       | G13D<br>WT            | G13D<br>WT        | G13D<br>WT         | WT              | WT          | WT               | G12V   |
| APC              | WT              | WT           | WT                       | I1417fs*<br>R2166*    | I1417fs<br>R2166* | M1430fs*<br>R1114* | Q1367*          | T1556fs*    | E853*<br>T1556fs | Q1338* |
| TP53             | WT              | WT           | WT                       | S241F<br>Intronic Sub | S241F<br>WT       | WT                 | E204*           | Y103-L111>L | R273H            | R273H  |
| CTNNB1           | ΔS45<br>WT      | S45F         | WT                       | WT                    | WT                | WT                 | G245A           | N287S       | WT               | WT     |
| PIK3CA           | H1047R<br>WT    | H1047R<br>WT | H1047R<br>WT             | E545K<br>D549N        | E545K<br>D549N    | WT                 | WT              | WT          | P449T<br>WT      | WT     |
| BRAF             | WT              | WT           | V600E<br>WT              | WT                    | WT                | WT                 | WT              | V600E<br>WT | V600E<br>WT      | WT     |

**Table S1.** Summary of mutations in cancer related genes in colorectal cancer cell lines. Source: Catalogue Of Somatic Mutations In Cancer - (COSMIC), v50)  
 \*HCT15 and DLD1 were derived from tumor cells obtained from different sites in the same patient

## S2 STANDARD SEARCH

| Group/Source/Spectrum | Distinct Peptides | Distinct Matches | Filtered Spectra | Distinct Analyses | Distinct Charges | Protein Groups |
|-----------------------|-------------------|------------------|------------------|-------------------|------------------|----------------|
|                       | 55922             | 71889            | 732057           | 2                 | 3                | 6094           |
| pepXML-ENS            | 55922             | 71889            | 732057           | 2                 | 3                | 6094           |
| CaCo2                 | 25763             | 31032            | 76996            | 1                 | 3                | 5463           |
| Rep3                  | 12457             | 14117            | 22150            | 1                 | 3                | 4182           |
| Rep1                  | 17984             | 20602            | 31756            | 1                 | 3                | 4771           |
| Rep2                  | 15701             | 18802            | 23090            | 1                 | 3                | 4460           |
| COLO205               | 22668             | 27380            | 71648            | 1                 | 3                | 5435           |
| Rep3                  | 15013             | 17725            | 22553            | 1                 | 3                | 4477           |
| Rep1                  | 13698             | 15469            | 21778            | 1                 | 3                | 4667           |
| Rep2                  | 12897             | 14751            | 27317            | 1                 | 3                | 4312           |
| RKO                   | 24979             | 31126            | 79453            | 1                 | 3                | 5315           |
| Rep3                  | 16269             | 19717            | 23740            | 1                 | 3                | 4544           |
| Rep1                  | 14186             | 16257            | 24723            | 1                 | 3                | 4391           |
| Rep2                  | 16273             | 19469            | 30990            | 1                 | 3                | 4423           |
| HCT15                 | 26553             | 32294            | 80879            | 1                 | 3                | 5614           |
| Rep3                  | 16938             | 19861            | 24628            | 1                 | 3                | 4605           |
| Rep1                  | 16169             | 18610            | 26265            | 1                 | 3                | 4953           |
| Rep2                  | 15714             | 18256            | 29986            | 1                 | 3                | 4673           |
| LS174T                | 25678             | 31263            | 84816            | 1                 | 3                | 5472           |
| Rep3                  | 14968             | 17644            | 22128            | 1                 | 3                | 4294           |
| Rep1                  | 14949             | 17767            | 29443            | 1                 | 3                | 4636           |
| Rep2                  | 18057             | 20891            | 33245            | 1                 | 3                | 4704           |
| HCT116                | 23796             | 28814            | 74880            | 2                 | 3                | 5415           |
| Rep3                  | 16074             | 18780            | 24212            | 1                 | 3                | 4534           |
| Rep1                  | 13522             | 15632            | 22324            | 1                 | 3                | 4252           |
| Rep2                  | 14098             | 16518            | 28344            | 1                 | 3                | 4505           |
| LoVo                  | 23952             | 29080            | 73033            | 1                 | 3                | 5342           |
| Rep3                  | 14480             | 17600            | 21296            | 1                 | 3                | 4179           |
| Rep1                  | 11963             | 13509            | 20903            | 1                 | 3                | 4042           |
| Rep2                  | 16416             | 18883            | 30834            | 1                 | 3                | 4629           |
| HT29                  | 24590             | 29391            | 66924            | 1                 | 3                | 5429           |
| Rep3                  | 14939             | 17782            | 22057            | 1                 | 3                | 4273           |
| Rep1                  | 16243             | 18417            | 26106            | 1                 | 3                | 4828           |
| Rep2                  | 10655             | 11341            | 18761            | 1                 | 3                | 3957           |
| SW480                 | 21232             | 25794            | 61442            | 1                 | 3                | 4974           |
| Rep3                  | 11920             | 13957            | 17864            | 1                 | 3                | 3897           |
| Rep1                  | 8192              | 9231             | 13606            | 1                 | 3                | 3183           |
| Rep2                  | 14950             | 17849            | 29972            | 1                 | 3                | 4203           |
| DLD1                  | 23101             | 27603            | 61986            | 1                 | 3                | 5322           |
| Rep3                  | 15656             | 18382            | 22702            | 1                 | 3                | 4512           |
| Rep1                  | 13463             | 15061            | 20752            | 1                 | 3                | 4311           |
| Rep2                  | 10075             | 11305            | 18532            | 1                 | 3                | 3781           |

## S4 CUSTOMIZED SEARCH

| Group/Source/Spectrum | Distinct Peptides | Distinct Matches | Filtered Spectra | Protein Groups |
|-----------------------|-------------------|------------------|------------------|----------------|
|                       | 59803             | 76023            | 734278           | 6513           |
| pepXML                | 59803             | 76023            | 734278           | 6513           |
| CACO2                 | 26377             | 31640            | 77581            | 5798           |
| Rep1                  | 18290             | 20915            | 32138            | 5073           |
| Rep2                  | 12543             | 14196            | 22193            | 4447           |
| Rep3                  | 15842             | 18934            | 23250            | 4729           |
| COLO205               | 23126             | 27818            | 71872            | 5750           |
| Rep1                  | 13838             | 15601            | 21927            | 4939           |
| Rep2                  | 13030             | 14867            | 27268            | 4589           |
| Rep3                  | 15132             | 17843            | 22677            | 4728           |
| DLD1                  | 23399             | 27904            | 61952            | 5659           |
| Rep1                  | 13512             | 15105            | 20695            | 4589           |
| Rep2                  | 10095             | 11323            | 18504            | 4022           |
| Rep3                  | 15756             | 18463            | 22753            | 4806           |
| HCT116                | 24207             | 29209            | 75218            | 5765           |
| Rep1                  | 13693             | 15804            | 22521            | 4587           |
| Rep2                  | 14118             | 16499            | 28262            | 4763           |
| Rep3                  | 16244             | 18970            | 24435            | 4844           |
| HCT15                 | 27409             | 33205            | 81972            | 5991           |
| Rep1                  | 16583             | 19048            | 26720            | 5238           |
| Rep2                  | 16019             | 18567            | 30352            | 4986           |
| Rep3                  | 17146             | 20094            | 24900            | 4879           |
| HT29                  | 24956             | 29754            | 66851            | 5762           |
| Rep1                  | 16355             | 18540            | 26119            | 5106           |
| Rep2                  | 10605             | 11285            | 18621            | 4182           |
| Rep3                  | 15026             | 17863            | 22111            | 4572           |
| LOVO                  | 24325             | 29425            | 72901            | 5683           |
| Rep1                  | 16487             | 18932            | 30739            | 4928           |
| Rep2                  | 12070             | 13592            | 20897            | 4333           |
| Rep3                  | 14542             | 17636            | 21265            | 4448           |
| LS174T                | 26109             | 31713            | 85095            | 5814           |
| Rep1                  | 18087             | 20915            | 33238            | 4977           |
| Rep2                  | 15087             | 17883            | 29507            | 4957           |
| Rep3                  | 15117             | 17821            | 22350            | 4543           |
| RKO                   | 25601             | 31819            | 80515            | 5637           |
| Rep1                  | 16527             | 19712            | 31358            | 4745           |
| Rep2                  | 14310             | 16412            | 24968            | 4634           |
| Rep3                  | 16533             | 20078            | 24189            | 4819           |
| SW480                 | 21272             | 25723            | 60321            | 5310           |
| Rep1                  | 14932             | 17766            | 29483            | 4505           |
| Rep2                  | 8013              | 9008             | 13246            | 3363           |
| Rep3                  | 11849             | 13824            | 17592            | 4179           |

S6 SelTarBase genes

ABCC2  
ABCF1  
ACVR2A  
AIM2  
ANGPT2  
APAF1  
APC  
ASTE1  
ASTE  
ATM  
ATR  
AXIN2  
B2M  
BAT2D1  
BAT3  
BAX  
BCL10  
BLM  
BRCA1  
BRCA2  
C14orf106  
Corf106  
Corf6  
C6orf80  
CANX  
CASP1  
CASP5  
CCKBR  
CDC25C  
CDH1  
CDK2AP1  
CDKL2  
CDX2  
CEBPZ  
CEP164  
CEP290  
CEP57  
CHD  
CHEK1  
COBLL1  
COIL  
CREBBP  
CRSP3  
CYSLTR1  
CYSLTR  
DSTN  
EDD1  
ELAVL3  
EP300  
EPHB2  
ERCC5  
F8  
FAS  
FBX046  
FGFBP1  
FILIP1L  
FLCN  
FLT3LG

FXR1  
GART  
GBP3  
GCC2  
GPRK2L  
GRB14  
HDAC2  
HMMR  
ICA1  
IGF2R  
INPPL1  
JARID1A  
KIAA0355  
KIAA1333  
KIF22  
LARP7  
LIG3  
LIMK2  
MAP1S  
MARCKS  
MBD4  
MKI67  
MLH3  
MNS1  
MSH3  
MSH6  
MYBL1  
MYH11  
MYO10  
NDUFC2  
NF1  
NIPBL  
NKTR  
NRIP1  
P4HB  
PA2G4  
PARP14  
PHF14  
PLXNA3  
POLD3  
PPRC1  
PRCC  
PRDM2  
PRKCI  
PRKDC  
PRRG1  
PSMB8  
PTEN  
PTHLH  
PTPN21  
PTPN23  
PTPN5  
PTPRA  
PTPRE  
PTPRS  
RAD50  
RBBP8  
RBM35A  
RECQL  
REV1  
REV3L  
REV2L

RFC3  
RGL2  
RGS12  
RIF1  
RNASEH2B  
SEC31A  
SEC63  
SLC16A4  
SCL16A4  
SLC17A2  
SLC23A2  
SLC4A3  
SMAP1  
SPINK5  
SRPK1  
STK11  
SYCP1  
TAF1B  
TAP1  
TAP2  
TAPBP  
TCF1  
TCF7L2  
TEAD2  
TGFBR2  
TIMP3  
TLOC1  
TMEM97  
TOP2B  
TTK  
USP1  
UVRAG  
WBP1  
WISP3  
WNK1  
WRN  
XPOT  
XRCC2  
XRCC6  
ZFP103  
ZMPSTE24  
ZMYND8  
ZNF365  
ZNF518  
ZNF609  
ZNF93  
ZNF297

S9 MRM PARAMETERS

| <b>HGNC Gene Symbol</b> | <b>Peptide</b>   | <b>Precursor (charge state); products (m/z)</b> |
|-------------------------|------------------|-------------------------------------------------|
| BAG3                    | ELLALDSVDPEGR    | 707 (2+); 987, 874, 573, 458                    |
| BAX                     | TGALLLQGFIQDR    | 716 (2+); 977, 863, 735, 418                    |
| CAND1                   | EGPAVVGQFIQDVK   | 744 (2+); 1034, 934, 489, 651                   |
| CARM1                   | YTVNFLEAK        | 543 (2+); 820, 721, 607, 460                    |
| CDH1                    | NTGVISVTTGLDR    | 716 (2+); 1061, 948, 761, 662                   |
| CPD                     | SQEGDSISVIGR     | 624 (2+); 1033, 903, 531, 345                   |
| DSTN                    | EILVGDVGVTTDPPFK | 852 (2+); 1249, 978, 821, 506                   |
| EEF2                    | YEWVDAEAR        | 570 (2+); 846, 660, 545, 446                    |
| ERAP1                   | ILASTQFEPTAAR    | 703 (2+); 791, 644, 515, 590                    |
| ESRP1                   | GLPWQSSDQDIAR    | 737 (2+); 1019, 891, 804, 652                   |
| FECH                    | GDPYPQEVSATVQK   | 760 (2+); 1087, 633, 674, 544                   |
| HSP90AA1                | ALLFVPR          | 408 (2+); 631, 518, 371, 316                    |
| HSP90AB1                | HLEINPDHPIVETLR  | 892 (2+); 1291, 1177, 965, 827                  |
| KRT18                   | AQIFANTVDNAR     | 660 (2+); 1007, 860, 789, 475                   |
| KRT19                   | DAEAWFTSR        | 542 (2+); 767, 696, 510, 363                    |
| KRT8                    | YEELQSLAGK       | 569 (2+); 845, 716, 603, 475                    |
| LMAN1                   | DIDNLVQR         | 487 (2+); 744, 402, 303, 202                    |
| MLH1                    | EGLAEYIVEFLK     | 706 (2+); 912, 748, 635, 536                    |
| MRE11A                  | GNDTFVTLDEILR    | 747 (2+); 1106, 959, 859, 645                   |
| MSH2                    | LLLAVFVTPLTDLR   | 786 (2+); 1062, 915, 815, 714                   |
| MSH6                    | IIDFLSALEGFK     | 677 (2+); 1127, 864, 751, 664                   |
| NARS                    | FLTWILNR         | 532 (2+); 802, 701, 515, 402                    |
| PAICS                   | EVYELLDSPGK      | 625 (2+); 729, 616, 503, 388                    |
| PFAS                    | FGEPVLAGFAR      | 582 (2+); 830, 521, 450, 416                    |
| RAD50                   | ILELDQELIK       | 607 (2+); 988, 858, 745, 630                    |
| TNOP1                   | YSDIDIILLK       | 597 (2+); 1030, 943, 828, 714                   |
| TTC19                   | GQLENAEQLFK      | 639 (2+); 1092, 978, 849, 664                   |

S10 Co-EXPRESSION MODULE ANALYSIS

| Module     | CACO  | CACO  | CACO  | COLO  | COLO  | COLO  | COLO  | H2T9  | H2T9  | H2T9  | ISW481 | ISW481 | ISW481 | ISW481 | DL.D1 | DL.D1 | HCT11 | HCT11 | HCT11 | HCT11 | HCT11 | HCT11 | LOVO  | LOVO  | LOVO  | LOVO  | LS174 | LS174 | LS174 | RKO.R   | RKO.R   | RKO.R   | RKO.R   | m       | ttest  | p.value | adj.p.value |
|------------|-------|-------|-------|-------|-------|-------|-------|-------|-------|-------|--------|--------|--------|--------|-------|-------|-------|-------|-------|-------|-------|-------|-------|-------|-------|-------|-------|-------|-------|---------|---------|---------|---------|---------|--------|---------|-------------|
| MODULE_40  | -0.56 | -0.59 | 0.56  | -0.10 | -0.27 | -0.22 | -0.16 | -0.63 | -0.14 | -1.25 | -2.55  | -0.99  | -0.42  | -0.23  | 0.26  | 0.41  | 0.18  | 0.12  | 0.34  | 0.19  | 0.54  | 0.67  | 0.26  | 0.89  | 0.40  | 0.49  | 0.63  | 1.05  | 1.03  | 1.21    | 0.0869  | -1.0692 | -9.047  | 0.0000  | 0.0041 |         |             |
| MODULE_42  | -0.09 | -1.35 | -0.41 | -0.91 | -0.78 | -0.38 | -1.19 | -1.55 | -1.10 | 0.44  | -0.02  | 0.45   | 0.35   | -0.21  | 0.32  | 0.24  | -0.05 | -0.11 | -0.06 | 0.14  | 0.30  | 0.65  | 0.39  | 0.64  | 0.59  | 0.54  | 0.55  | 1.13  | 0.65  | 0.90    | 0.0189  | -0.8906 | -4.2297 | 0.0002  | 0.0149 |         |             |
| MODULE_156 | 0.47  | -0.01 | 0.99  | 0.43  | 0.16  | 1.05  | -0.03 | -0.05 | 0.45  | 0.58  | 0.83   | 1.20   | 0.47   | -0.77  | -0.34 | 0.69  | 0.51  | 0.47  | -0.35 | -1.03 | -0.14 | -1.61 | -1.75 | -1.52 | 0.33  | 0.65  | 0.35  | -0.82 | -0.63 | -0.59   | -0.9886 | 0.9861  | 4.1683  | 0.0003  | 0.0149 |         |             |
| MODULE_56  | 0.12  | 0.35  | -0.16 | 0.63  | 0.67  | 0.49  | 0.66  | 0.27  | 0.53  | -0.10 | 0.08   | 0.35   | 0.63   | 0.66   | 0.74  | 0.30  | 0.22  | 0.27  | 0.87  | 0.65  | 0.65  | -0.84 | -0.62 | -1.39 | 0.18  | 0.10  | 0.26  | 2.14  | -1.71 | -1.90   | -0.9846 | 0.9462  | 3.7047  | 0.0009  | 0.0385 |         |             |
| MODULE_152 | 0.02  | -0.61 | -0.70 | -0.30 | -0.50 | -0.39 | 0.79  | 1.13  | 1.12  | 0.57  | 0.86   | 1.29   | 0.49   | -0.20  | 0.22  | 1.12  | 1.23  | 1.21  | -0.31 | -0.90 | 0.71  | 0.67  | 0.08  | -0.34 | 0.75  | -0.35 | 0.48  | -0.81 | -1.33 | -1.21   | 0.9925  | 0.9249  | 0.9593  | 0.0012  | 0.0410 |         |             |
| MODULE_129 | -0.96 | -1.34 | -1.28 | -0.65 | -0.02 | 0.24  | -1.06 | -0.67 | -1.15 | 0.24  | 0.89   | 0.57   | -0.37  | 0.08   | -0.06 | -0.44 | -0.58 | 0.08  | -0.06 | 0.71  | 0.63  | 0.92  | 1.85  | 0.99  | 0.51  | 0.87  | 0.70  | -0.09 | -0.04 | -0.92   | 0.8844  | -0.8440 | -3.3517 | 0.0023  | 0.0566 |         |             |
| MODULE_54  | -0.12 | -0.30 | -0.18 | -0.29 | -0.35 | 0.15  | 0.61  | 0.40  | 0.70  | -0.26 | -1.53  | 0.19   | 0.17   | -0.67  | -0.15 | -1.56 | -1.01 | -1.59 | 0.31  | 0.76  | 0.09  | 0.55  | -0.41 | 0.20  | 0.73  | 0.61  | 0.30  | 0.73  | 0.63  | 0.90    | 0.7560  | -0.7505 | -3.3414 | 0.0024  | 0.0566 |         |             |
| MODULE_75  | 0.87  | 0.81  | 0.24  | 0.64  | 0.46  | 0.47  | 0.92  | 0.82  | 0.27  | -0.61 | 0.25   | 0.14   | 0.55   | -0.17  | -0.26 | -0.53 | 0.76  | 0.31  | 0.64  | 0.06  | 0.46  | -0.14 | -1.14 | -1.25 | -1.56 | -1.41 | -0.79 | -1.17 | -0.76 | 0.7674  | 0.7640  | 3.0831  | 0.0046  | 0.0906  |        |         |             |
| MODULE_108 | 0.19  | 0.20  | 0.64  | -0.20 | -0.27 | 0.20  | 0.24  | -1.68 | 0.51  | -1.32 | -1.75  | -0.97  | -1.18  | -1.61  | -0.64 | 0.47  | 0.72  | 0.72  | 0.36  | 0.29  | 0.41  | 0.53  | 0.31  | 0.76  | 0.49  | 0.23  | 0.64  | 0.44  | 0.62  | 0.64    | -0.7954 | -0.7953 | -3.0654 | 0.0049  | 0.0906 |         |             |
| MODULE_63  | 0.30  | 0.14  | 0.20  | 0.93  | -0.37 | -0.17 | -1.20 | -0.13 | 0.70  | -0.26 | -1.04  | 0.19   | 1.33   | -0.30  | 0.29  | 0.67  | 0.69  | 0.93  | 1.34  | 0.46  | 0.01  | -1.10 | -1.16 | -1.61 | -0.12 | -0.42 | -0.41 | -0.51 | -0.87 | -0.88   | -0.7388 | 0.7376  | 2.9341  | 0.0066  | 0.1103 |         |             |
| MODULE_144 | 0.62  | 0.38  | 1.26  | 1.36  | 0.40  | 0.93  | 1.58  | 0.73  | 1.18  | 0.81  | -0.96  | 1.11   | 0.76   | -0.69  | -1.16 | -0.65 | -0.66 | 0.96  | 1.34  | -0.81 | -0.54 | -0.39 | -0.68 | -0.96 | -0.56 | -0.61 | -0.32 | -0.29 | -0.11 | 0.51    | -0.0764 | 0.7640  | 2.7973  | 0.0092  | 0.1337 |         |             |
| MODULE_127 | -0.56 | -0.15 | -1.19 | -0.71 | -0.57 | -0.62 | 0.95  | -0.34 | -1.04 | 1.33  | 0.22   | 0.75   | 0.66   | -0.47  | -0.27 | 0.32  | -0.46 | -0.33 | 0.12  | -0.55 | 1.21  | 0.20  | 0.94  | -0.06 | 0.09  | -0.46 | 1.36  | 0.37  | 0.79  | -0.7194 | -2.7264 | 0.0109  | 0.1337  |         |        |         |             |
| MODULE_116 | -1.45 | -1.39 | -0.73 | 0.42  | 1.12  | 0.78  | 0.29  | 0.50  | 0.26  | -0.55 | -1.04  | -1.24  | -0.96  | -0.24  | -0.80 | -0.59 | 0.40  | -0.18 | 0.15  | 0.23  | 0.32  | -0.53 | -0.36 | -0.54 | 1.24  | 1.20  | 0.82  | 1.01  | 0.77  | 0.82    | 0.0750  | -0.7503 | -2.7166 | 0.0112  | 0.1337 |         |             |
| MODULE_106 | -0.76 | -0.48 | -0.49 | -1.13 | -1.28 | -1.35 | 0.57  | 0.68  | -0.23 | -0.60 | -1.64  | -1.23  | 0.64   | 0.10   | -0.48 | 0.98  | 0.65  | 0.82  | 0.51  | 0.30  | 0.39  | -0.27 | -0.08 | -0.32 | 0.78  | 1.03  | 0.74  | 0.77  | 0.63  | 0.77    | -0.7288 | -0.7277 | -2.7049 | 0.0115  | 0.1337 |         |             |
| MODULE_164 | 0.43  | 0.70  | 0.40  | -0.47 | 1.02  | 0.48  | -0.21 | -0.19 | 0.18  | 0.85  | 0.11   | 0.44   | 0.48   | -0.23  | -0.47 | -0.43 | -0.11 | 0.24  | 0.08  | 0.18  | 0.03  | -1.51 | -2.21 | -3.24 | 0.09  | 0.11  | -0.03 | 0.14  | 0.31  | 0.36    | 0.0788  | 0.7884  | 2.6793  | 0.0122  | 0.1337 |         |             |
| MODULE_26  | 0.63  | 0.52  | 0.50  | 1.99  | 1.62  | 1.72  | 0.87  | 0.89  | 0.70  | -0.60 | -0.69  | -0.37  | -0.53  | -0.90  | -0.68 | 0.05  | -0.24 | -0.41 | -0.29 | -0.48 | -0.64 | -0.41 | -0.70 | -0.35 | -0.31 | 0.16  | -0.54 | -0.62 | -0.56 | -0.32   | 0.0705  | 0.7047  | 2.6377  | 0.0135  | 0.1337 |         |             |
| MODULE_124 | 1.27  | 1.73  | -2.46 | 0.61  | 0.09  | 0.16  | 0.46  | 0.69  | 0.01  | -0.99 | -0.35  | -1.43  | 0.49   | 0.55   | -0.29 | 0.26  | 0.17  | -0.11 | 0.50  | 0.79  | 0.21  | 0.00  | 0.18  | 0.48  | 0.55  | 0.39  | 0.66  | 0.22  | 0.50  | 0.67    | 0.0714  | -0.7142 | -2.6335 | 0.0136  | 0.1337 |         |             |
| MODULE_10  | -0.32 | -0.38 | -0.47 | -0.22 | 0.04  | 0.01  | -0.17 | -0.52 | -0.51 | -0.42 | -0.43  | -0.31  | -0.11  | -0.45  | -0.30 | -0.11 | -0.01 | -0.12 | -0.08 | 0.01  | -0.13 | -0.33 | -0.40 | -0.41 | -0.14 | -0.40 | 1.93  | 2.03  | 0.28  | 0.0675  | -0.6171 | -2.5412 | 0.0169  | 0.1549  |        |         |             |
| MODULE_142 | 0.09  | 0.01  | 0.15  | 0.64  | -0.69 | 0.65  | 0.15  | -0.20 | -0.35 | 1.39  | 2.46   | 1.09   | 0.63   | -0.42  | -0.65 | 1.34  | 1.49  | 1.15  | 0.52  | -0.26 | -0.50 | -0.45 | -0.63 | -0.63 | -0.25 | 0.02  | -0.46 | -0.37 | -0.39 | 0.66    | 0.7088  | 0.7080  | 2.5142  | 0.0180  | 0.1549 |         |             |
| MODULE_58  | -0.59 | -1.78 | -0.32 | 0.13  | 0.79  | 0.02  | -0.49 | -1.52 | -0.26 | 0.45  | -0.79  | -0.13  | 0.36   | -1.66  | 0.04  | 0.89  | 0.60  | 0.92  | 0.39  | 0.19  | 0.60  | -0.15 | -0.75 | -0.34 | 0.88  | 0.30  | 0.63  | 1.46  | 0.61  | 0.14    | 0.6993  | -0.6927 | -2.5000 | 0.0185  | 0.1549 |         |             |
| MODULE_113 | -0.13 | -1.24 | -0.37 | -1.27 | -1.59 | -0.22 | -0.06 | -0.30 | 0.47  | 0.15  | 0.64   | 0.20   | -1.15  | 0.52   | 0.59  | 0.74  | 0.51  | 0.60  | 0.24  | 0.08  | 0.15  | 0.16  | 1.10  | 0.18  | -0.28 | -0.20 | 0.86  | 0.47  | 1.13  | 0.0683  | -0.6835 | -2.3776 | 0.0245  | 0.1880  |        |         |             |
| MODULE_147 | 0.73  | 1.32  | 0.46  | 0.00  | 0.03  | -0.32 | 1.20  | 0.94  | 0.98  | -0.40 | 0.54   | -1.49  | 0.34   | 1.02   | 0.27  | -0.62 | 0.29  | -0.54 | 0.68  | 1.05  | -0.07 | -0.45 | -1.13 | -1.36 | -0.47 | 0.38  | -1.09 | -0.82 | -0.58 | -0.87   | -0.6567 | 0.6569  | 2.3066  | 0.0254  | 0.1880 |         |             |
| MODULE_111 | -0.06 | -0.26 | -0.08 | -0.01 | -0.58 | -0.44 | -0.02 | -0.40 | -0.58 | -1.15 | -1.81  | -1.19  | 0.68   | 0.42   | 0.72  | 0.32  | 0.16  | 0.22  | 0.71  | 0.75  | 0.80  | -0.27 | -0.59 | -0.69 | 0.15  | 0.14  | 0.23  | 0.87  | 0.93  | 1.05    | 0.0624  | -0.5642 | -2.3527 | 0.0259  | 0.1880 |         |             |
| MODULE_21  | 1.04  | 1.25  | 1.42  | 1.18  | 1.90  | 0.31  | -0.51 | -0.31 | -0.62 | -0.62 | -0.39  | -0.23  | -0.13  | 0.03   | -0.43 | -0.36 | -0.50 | -0.23 | -0.20 | -0.31 | -0.46 | -0.61 | -0.64 | 0.02  | -0.13 | -0.66 | -0.46 | -0.44 | -0.05 | 0.6247  | 2.3020  | 0.0290  | 0.1961  |         |        |         |             |
| MODULE_165 | -0.59 | -1.11 | -1.60 | -1.57 | -1.06 | -1.74 | -0.92 | -1.29 | -0.40 | 0.67  | 1.05   | 0.08   | 0.37   | 0.56   | 0.45  | 0.01  | 0.54  | 0.67  | -0.37 | 0.36  | 0.28  | 0.61  | 1.17  | 0.80  | 0.13  | -0.26 | -0.63 | 1.26  | 0.89  | 0.67    | 0.6881  | -0.6812 | -2.2884 | 0.0299  | 0.1961 |         |             |
| MODULE_66  | 1.10  | 1.07  | 0.40  | 1.17  | 0.48  | 1.23  | 0.29  | -0.88 | -0.89 | 0.48  | 1.05   | 1.09   | 0.78   | -0.57  | -0.64 | 0.92  | 0.41  | 0.24  | -0.49 | -0.43 | -0.50 | -0.55 | -0.48 | -0.78 | -0.01 | 0.49  | -0.24 | -0.41 | -0.44 | -0.24   | 0.0565  | 0.5646  | 2.2511  | 0.0308  | 0.1961 |         |             |
| MODULE_125 | -0.62 | -0.54 | 0.47  | -0.70 | -1.09 | -0.76 | -0.72 | -0.31 | 0.49  | 1.49  | 0.79   | 1.04   | -0.64  | -0.96  | -0.05 | -0.16 | -0.59 | -0.06 | -0.14 | 0.12  | 0.29  | 0.55  | -0.58 | -0.67 | 0.16  | 0.27  | 0.40  | 0.48  | 1.96  | 0.76    | 1.58    | -0.0626 | -0.6246 | -2.2573 | 0.0320 | 0.1961  |             |
| MODULE_161 | 0.40  | 1.02  | 0.71  | 1.13  | 0.45  | 0.69  | 0.77  | -0.14 | -0.55 | -1.00 | -0.89  | -1.12  | 1.22   | 0.07   | 1.03  | 1.02  | -0.10 | -0.14 | 1.02  | 0.33  | 0.60  | -1.02 | -1.15 | -1.05 | -0.21 | -0.09 | -0.13 | -1.25 | -1.34 | -1.45   | 0.0656  | 0.6556  | 2.2349  | 0.0336  | 0.1961 |         |             |
| MODULE_110 | 0.52  | -0.45 | 0.63  | 1.19  | -0.38 | -0.93 | 1.13  | -1.12 | -0.67 | -0.32 | -0.52  | -1.43  | 0.81   | 0.05   | 0.30  | 0.21  | 0.25  | 0.59  | 0.06  | 0.46  | 0.79  | -0.74 | -1.30 | -0.37 | 1.12  | 0.81  | 0.06  | 1.43  | 1.12  | 1.28    | 0.0647  | -0.6468 | -2.2284 | 0.0341  | 0.1961 |         |             |
| MODULE_110 | -0.59 | -1.78 | -1.32 | 0.38  | 0.14  | 0.36  | 0.17  | -0.06 | -0.27 | 1.78  | 1.12   | -1.27  | 0.82   | 0.13   | 0.38  | 0.70  | 0.69  | 0.77  | 0.53  | 0.30  | 0.10  | -0.19 | -0.15 | 0.31  | 0.61  | 0.83  | 0.98  | 0.38  | 0.24  | 0.42    | 0.0560  | 0.0101  | -1.8738 | 0.0372  | 0.2068 |         |             |
| MODULE_134 | 0.10  | 0.06  | 0.42  | 0.65  | 1.05  | 1.22  | 0.64  | 0.36  | 0.64  | -0.55 | -1.43  | -0.27  | 0.45   | 0.16   | 0.44  | 0.73  | 0.22  | 0.02  | 0.45  | 0.19  | 0.57  | -1.41 | -1.64 | -0.69 | 0.67  | 0.64  | 0.86  | -1.52 | -0.94 | -1.84   | 0.0646  | 0.6458  | 2.1535  | 0.0400  | 0.2068 |         |             |
| MODULE_111 | 0.74  | 0.05  | 0.23  | -0.77 | -1.08 | 1.20  | 0.29  | -0.40 | 0.13  | 0.42  | 0.99   | 0.66   | 1.00   | 0.91   | 0.73  | 0.26  | 0.35  | 0.28  | 0.57  | 0.53  | 0.54  | 0.35  | 0.21  | -1.04 | -0.76 | -0.72 | -1.50 | -1.93 | -1.37 | -0.0638 | 0.6381  | 2.1458  | 0.0407  | 0.2068  |        |         |             |
| MODULE_47  | -0.98 | -1.63 | -0.55 | 0.47  | 0.55  | 0.58  | 0.24  | -0.31 | 0.12  | -0.67 | -2.38  | -0.80  | 0.05   | -0.90  | -0.02 | 0.63  | 0.56  | 0.69  | 0.13  | -0.29 | -0.34 | 0.22  | -0.55 | 0.29  | 0.62  | 0.48  | 0.61  | -1.11 | 0.96  | 1.14    | 0.0607  | -0.6065 | -2.1405 | 0.0412  | 0.2068 |         |             |
| MODULE_14  | 0.10  | -0.03 | -0.20 | -0.40 | -0.47 | -0.45 | -0.42 | 0.13  | -0.48 | 0.03  | -0.36  | -0.22  | -0.38  | -0.27  | -0.16 | -0.18 | -0.23 | 0.05  | -0.04 | -0.15 | 0.23  | 1.14  | 1.90  | 2.19  | -0.25 | -0.61 | -0.50 | -0.26 | -0.08 | -0.42   | 0.0549  | -0.5484 | -2.1299 | 0.0421  | 0.2068 |         |             |
| MODULE_49  | -0.04 | 0.11  | 0.48  | -1.62 | -1.63 | -1.13 | -0.85 | -0.19 | -0.06 | 0.72  | 0.94   | 0.79   | -0.05  | -1.10  | -0.42 | 0.14  | -0.05 | 0.02  | -0.11 | -0.01 | 0.24  | 0.58  | 0.91  | 1.06  | -0.49 | -0.31 | -0.07 | 0.98  | 0.65  | 1.00    | 0.5597  | -0.5497 | -2.0933 | 0.0455  | 0.2143 |         |             |
| MODULE_166 | 0.60  | 0.15  | 0.36  | 0.66  | 1.05  | 0.86  | 1.42  | 1.30  | 0.58  | -0.58 | -1.02  | -0.19  | 0.67   | 0.81   | 0.4   |       |       |       |       |       |       |       |       |       |       |       |       |       |       |         |         |         |         |         |        |         |             |



MODULE\_17 -0.83 -0.97 -0.73 1.02 1.12 1.07 1.00 0.61 0.78 -0.61 -1.50 -0.60 -0.44 -1.35 -0.32 0.18 0.27 -0.12 0.54 0.06 0.28 0.04 -0.44 -0.13 0.65 0.74 0.80 -0.26 -0.28 -0.58 0.0196 -0.1965 -0.7153 0.4803 0.6915  
MODULE\_112 -0.70 -0.60 -0.70 -0.84 -0.99 -0.91 -0.67 -0.59 -0.42 1.28 2.26 2.00 0.17 -0.18 0.36 -0.51 -0.26 -0.28 0.74 0.21 0.96 0.69 0.74 0.25 -0.68 -0.78 -0.72 0.21 0.09 -0.12 0.0220 -0.2199 -0.6971 0.4915 0.7015  
MODULE\_6 0.12 0.23 0.38 0.73 0.83 0.75 0.35 0.30 0.38 -1.54 -2.32 -1.63 0.00 -0.24 -0.03 0.11 0.18 0.09 0.27 0.11 -0.06 -0.06 -0.39 -0.15 0.78 0.78 0.72 -0.35 -0.13 -0.18 0.0186 -0.1862 -0.6874 0.4975 0.7041  
MODULE\_154 -0.17 -0.61 -0.06 1.17 0.30 1.51 -1.02 -0.90 -0.96 0.26 -0.42 0.13 -0.47 -0.74 -0.82 0.47 0.58 0.34 0.15 0.44 -0.86 -0.93 -0.94 -0.33 1.21 1.15 1.54 -0.44 0.13 0.30 0.0197 -0.1968 -0.6711 0.5077 0.7119  
MODULE\_145 0.10 0.49 -0.49 0.97 0.19 -0.01 1.12 1.51 -0.45 -1.60 -1.26 -0.51 0.75 0.80 -0.31 -0.81 -0.99 -0.99 1.03 0.49 0.53 -0.31 -0.37 -1.26 0.75 0.73 0.80 -0.68 0.16 -0.40 0.0204 -0.2041 -0.6649 0.5116 0.7119  
MODULE\_132 0.32 0.87 0.73 0.02 1.08 1.05 0.40 -0.33 0.28 -0.99 -0.09 -0.97 -0.14 0.63 -0.39 0.13 0.11 -0.53 0.17 0.48 -0.15 -1.83 -1.38 -1.43 -0.25 0.40 -0.30 1.19 1.20 0.50 -0.0193 0.1928 0.6541 0.5184 0.7154  
MODULE\_85 0.33 0.54 -0.32 -1.22 -0.34 -0.59 -1.51 -1.95 -1.42 0.12 1.05 0.42 0.73 1.30 0.68 0.11 0.53 0.19 0.16 0.39 0.32 -0.39 0.35 0.64 0.06 0.01 -0.46 0.24 0.86 0.56 0.0186 -0.1864 -0.6442 0.5247 0.7182  
MODULE\_158 0.21 0.24 -1.13 1.16 0.39 -0.52 0.17 -1.13 -0.75 -0.27 -1.13 1.13 0.94 -0.20 0.76 0.79 0.50 0.11 1.16 0.85 0.80 -0.15 0.33 -1.13 -0.94 -0.92 -0.75 0.20 1.21 0.69 -0.0187 -0.1865 -0.6209 0.5397 0.7327  
MODULE\_38 -0.16 -0.04 -0.36 0.02 -0.19 -0.45 -0.43 -0.31 -0.47 -0.59 0.05 -0.33 1.90 1.86 2.12 -0.47 -0.61 -0.32 0.80 0.75 0.11 -0.44 0.20 -0.27 -0.42 -0.26 -0.10 -0.43 -0.61 -0.55 -0.0170 -0.1703 0.6038 0.5509 0.7419  
MODULE\_13 -0.50 -0.53 -0.25 -0.31 -0.02 -0.21 1.52 1.62 1.48 -0.38 -0.60 -0.60 -0.53 -0.64 -0.53 -0.24 -0.15 -0.38 -0.40 -0.56 -0.39 0.00 -0.21 -0.22 1.53 1.76 0.94 -0.37 -0.45 -0.39 0.0173 -0.1733 -0.5930 0.5579 0.7434  
MODULE\_15 MODULE\_15 0.49 -0.72 -0.22 -0.44 -0.64 -0.43 0.64 0.56 0.46 1.59 1.96 1.82 -0.51 -0.58 -0.20 -0.41 -0.62 -0.59 -0.16 -0.51 -0.41 0.39 0.63 0.79 -0.34 -0.01 -0.09 -0.58 -0.46 -0.45 -0.0166 0.1661 0.5886 0.5609 0.7434  
MODULE\_41 0.63 0.99 0.57 0.19 0.36 0.49 0.53 0.67 0.31 -0.32 -0.03 -0.15 0.52 0.56 0.47 -1.69 -1.70 -1.24 -0.15 -0.26 -0.01 0.05 0.35 0.25 0.76 0.81 0.67 -1.46 -1.07 -1.11 -0.0162 0.1619 0.5507 0.5862 0.7677  
MODULE\_48 -0.79 -1.10 -0.46 0.25 0.05 0.07 0.40 0.54 0.45 -0.61 -1.70 -0.73 0.57 -0.57 -0.12 0.94 0.87 0.84 0.43 0.20 -0.07 -0.12 -1.68 -0.72 -0.36 0.30 0.05 0.93 1.03 1.13 0.0153 -0.1530 -0.5363 0.5960 0.7677  
MODULE\_167 0.40 0.60 0.39 1.22 1.46 1.31 0.82 0.99 -0.10 -1.65 -0.54 -1.15 -0.31 -0.50 -0.69 -0.57 0.32 0.75 0.02 0.42 -0.66 -0.14 -0.88 -1.11 1.35 1.23 0.16 -1.07 0.10 -0.67 -0.0174 0.1737 0.5358 0.5963 0.7677  
MODULE\_61 -0.43 -1.01 -1.00 1.03 0.97 1.21 0.38 0.16 0.26 0.38 -0.97 0.46 -0.16 -0.71 -0.30 0.29 0.13 0.37 -0.44 -0.57 -0.52 0.64 0.28 0.38 0.81 0.64 1.02 -1.17 -0.94 -1.17 -0.0146 0.1459 0.5339 0.5976 0.7677  
MODULE\_51 -0.66 -0.73 -0.68 0.97 0.99 1.14 1.28 1.08 1.26 -0.14 -0.08 0.31 -0.57 -0.95 -0.54 -0.45 -0.54 -0.49 -0.08 -0.39 -0.29 -0.54 -0.42 -0.32 1.21 1.23 1.40 -1.00 -1.05 -0.95 -0.0165 0.1653 0.5254 0.6035 0.7693  
MODULE\_120 0.20 0.12 0.17 -1.28 -1.06 -0.66 -0.82 -1.04 -0.55 0.31 -1.04 0.64 0.49 -0.41 0.88 0.95 0.92 1.11 -0.23 -0.39 -0.16 1.09 1.02 1.63 -0.94 -1.08 -0.64 0.29 0.09 0.39 0.0149 -0.1488 -0.4885 0.6290 0.7957  
MODULE\_84 -0.43 -0.17 -0.42 -0.25 -0.37 0.33 -1.10 -1.65 -0.82 -0.13 1.36 0.75 0.34 0.96 0.56 0.05 0.12 0.00 0.17 -0.33 -0.16 0.70 0.98 1.09 -1.18 -0.99 -0.40 0.35 0.10 0.56 0.0124 -0.1237 -0.4571 0.6511 0.8124  
MODULE\_36 1.45 1.38 1.49 0.56 0.37 0.01 -0.25 -1.28 -0.48 -1.09 -1.63 -1.08 0.60 0.52 0.40 0.14 -0.04 -0.09 0.74 0.52 0.28 -0.73 -0.97 -1.09 -0.12 0.03 -0.34 -0.08 0.61 0.14 -0.0138 0.1377 0.4560 0.6519 0.8124  
MODULE\_3 0.50 0.26 0.51 0.37 0.29 0.41 0.26 0.02 0.30 -1.12 -2.65 -1.02 0.28 -0.31 0.10 0.43 0.20 0.31 0.38 0.26 0.41 -0.49 -1.45 -0.78 0.56 0.32 0.35 0.53 0.24 0.51 0.0119 -0.1193 -0.4330 0.6684 0.8268  
MODULE\_114 0.49 0.78 -0.38 0.20 -0.11 -0.11 -0.04 0.17 -0.69 0.59 1.64 1.11 0.02 0.44 0.19 1.68 -1.52 2.00 0.42 0.79 0.01 0.57 0.89 0.73 -0.10 -0.37 -0.90 -0.54 0.06 -0.64 -0.0126 -0.1260 -0.4078 0.6865 0.8430  
MODULE\_118 0.93 1.21 0.86 0.69 0.63 0.30 0.11 -0.18 -0.30 -1.97 -1.33 -1.42 0.94 0.97 0.79 -0.55 -0.32 -0.43 0.29 0.42 -0.09 0.51 0.89 0.49 0.02 0.17 -0.09 -1.19 -1.16 -1.18 -0.0128 0.1277 0.4005 0.6918 0.8433  
MODULE\_163 2.17 1.44 1.97 -0.35 -0.96 -0.25 -0.21 -0.79 -0.17 0.30 -1.02 -0.34 0.09 -1.19 0.79 -0.44 -0.17 0.05 1.03 -0.80 0.71 -0.24 -0.84 -0.53 -0.45 -0.66 -0.72 0.32 0.56 0.70 -0.0127 0.1269 0.3912 0.6986 0.8452  
MODULE\_140 0.58 1.02 1.12 0.89 0.45 -0.81 1.02 1.15 0.19 -1.02 -0.85 -1.35 0.25 -1.06 0.43 -1.10 -1.01 -0.71 0.49 0.53 0.41 0.27 0.92 0.52 -0.40 0.63 -0.40 -0.79 -0.45 -0.90 0.0116 -0.1165 -0.3845 0.7035 0.8452  
MODULE\_121 -0.84 -0.01 -0.85 -0.01 0.62 0.26 -0.57 -0.33 -0.54 0.92 1.91 0.89 -0.51 -0.74 -0.76 0.26 -0.09 -0.40 -0.02 -0.60 -0.27 0.80 1.00 1.18 0.65 1.07 1.04 -0.98 -0.88 -1.19 0.0110 -0.1102 -0.3760 0.7098 0.8466  
MODULE\_155 0.15 0.19 0.44 1.09 1.40 1.47 0.96 -0.33 0.93 -1.27 -1.65 -1.88 0.22 -0.07 0.25 -0.58 0.05 -0.56 0.25 0.25 0.50 -0.51 -0.90 -0.31 0.15 1.05 0.71 -0.34 -0.26 -1.40 -0.0112 0.1123 0.3456 0.7322 0.8558  
MODULE\_74 0.17 0.48 0.51 0.66 0.71 0.95 0.22 -0.38 0.14 -0.76 -1.80 -1.30 -0.92 -1.48 -0.56 0.73 1.03 0.83 -0.67 -0.75 -0.61 -0.19 -1.12 -0.15 0.85 0.66 0.92 0.83 0.37 0.64 -0.0107 -0.1070 -0.3432 0.7340 0.8558  
MODULE\_159 0.71 0.45 0.33 0.69 0.47 0.36 0.55 -0.16 -0.09 -1.24 -2.06 -1.27 0.49 0.67 0.28 0.09 0.73 0.01 0.65 0.42 0.38 -0.11 -1.30 0.04 -1.70 -1.25 -0.47 0.76 0.70 1.12 -0.0106 0.1062 0.3392 0.7370 0.8558  
MODULE\_34 0.51 0.70 -0.01 -1.22 -1.32 -1.75 -0.80 -0.92 -1.23 0.56 1.12 0.60 0.43 1.08 0.50 0.26 0.48 0.31 0.44 0.65 0.47 0.31 0.60 0.04 -0.71 -0.61 -0.74 0.00 0.26 0.00 0.0097 -0.0972 -0.3380 0.7379 0.8558  
MODULE\_78 -0.30 -0.37 0.46 1.40 0.77 0.57 0.57 -0.21 -0.25 -0.75 -1.17 -1.08 -0.32 -0.54 -0.46 1.20 0.23 0.94 0.10 -0.33 0.00 -0.57 -0.84 -0.92 1.27 1.56 1.19 -0.68 -0.88 -0.57 -0.0094 0.0944 0.3092 0.7595 0.8747  
MODULE\_45 -0.06 0.25 -0.17 1.72 1.91 1.35 0.58 -0.08 -0.61 -1.18 -0.81 -0.85 -0.06 -0.60 -0.72 -0.19 0.31 -0.18 0.69 0.40 -0.31 -0.41 -0.59 -0.75 0.67 1.02 0.41 -0.67 -0.34 -0.74 -0.0085 0.0847 0.2868 0.7764 0.8880  
MODULE\_29 0.68 0.31 0.70 -0.40 -0.85 -1.03 -0.84 -1.80 -1.15 0.28 0.25 0.42 1.09 0.77 1.12 0.09 -0.12 -0.07 0.74 0.63 0.89 -0.22 -0.56 -0.63 -0.41 -0.53 -0.73 0.32 0.46 0.59 0.0077 -0.0775 -0.2776 0.7834 0.8900  
MODULE\_82 -0.58 -0.83 -0.82 0.59 0.39 -0.18 -0.29 -0.94 -0.77 1.04 1.29 1.33 -0.66 -0.61 -0.88 1.29 0.59 0.56 0.16 -0.41 -0.25 -0.24 0.26 -0.92 -0.87 -0.49 -0.57 1.00 0.74 1.07 -0.0073 0.0729 0.2480 0.8060 0.9092  
MODULE\_143 0.74 0.59 0.01 -1.35 -1.32 -0.98 -1.31 -0.14 -0.73 1.21 1.90 1.24 -0.28 0.73 -0.02 -0.29 -0.45 -0.08 -0.73 0.75 0.02 -0.30 -0.83 -0.29 0.08 -0.39 0.29 0.77 0.51 0.63 0.0073 -0.0732 -0.2412 0.8112 0.9092  
MODULE\_18 0.26 0.27 0.56 0.35 0.18 0.17 0.22 0.27 0.28 -1.65 -2.16 -1.85 0.50 0.30 0.47 0.37 0.51 0.47 0.48 0.56 0.68 0.28 -0.29 0.13 0.48 0.39 0.48 -1.05 -0.84 -0.82 0.0067 -0.0674 -0.2318 0.8184 0.9111  
MODULE\_89 0.16 -0.09 -0.15 1.19 -0.24 -0.78 0.92 0.16 0.25 -1.35 -1.26 -1.12 1.18 1.38 0.60 -0.05 -0.37 0.06 1.41 0.48 0.41 -0.57 -0.79 -1.32 -0.17 -0.35 -0.90 0.36 0.29 0.67 -0.0067 0.0673 0.2206 0.8247 0.9121  
MODULE\_7 -0.54 -0.57 -0.49 1.41 1.28 1.48 0.79 -0.09 0.51 -0.59 -0.42 -0.35 -0.59 -0.62 -0.40 -0.48 -0.45 -0.30 -0.29 -0.48 -0.62 0.18 0.00 -0.01 1.06 1.10 1.29 -0.61 -0.58 -0.63 0.0058 -0.0582 -0.2134 0.8349 0.9173  
MODULE\_141 -1.01 -1.02 -0.99 0.17 -0.21 -0.61 0.31 1.01 0.25 0.25 1.99 1.04 -0.11 0.62 -1.18 0.06 -0.21 0.08 0.02 0.40 -0.54 0.70 0.97 1.03 -1.48 -0.86 -1.38 0.73 -0.01 -0.01 -0.0061 0.0607 0.1934 0.8480 0.9212  
MODULE\_37 0.01 0.04 0.02 -0.89 -0.79 -1.01 -0.41 -0.26 -0.77 0.95 1.96 0.77 -0.47 0.07 0.40 -0.20 -0.05 0.26 -0.64 -0.44 -0.62 0.80 1.42 0.48 -0.59 -0.59 -0.83 0.58 1.06 -0.25 0.0054 -0.0537 -0.1915 0.8495 0.9212  
MODULE\_117 -0.31 -0.30 -0.55 2.64 1.03 1.73 -0.33 -0.55 -0.55 -0.55 -0.55 -0.16 -0.26 -0.08 -0.55 -0.37 -0.10 -0.09 -0.41 -0.02 0.55 1.98 0.72 -0.55 -0.30 -0.55 -0.17 -0.27 -0.55 -0.0047 -0.0472 -0.1511 0.8810 0.9422  
MODULE\_73 0.88 1.00 0.60 -0.69 -0.52 -0.36 -0.96 -0.24 -0.34 1.00 2.01 0.44 -0.84 0.33 0.09 -1.02 -0.30 -0.77 -0.38 -0.54 -0.29 1.02 1.14 0.67 -0.54 -0.68 -1.21 -0.16 0.44 0.23 0.0044 0.0437 0.1476 0.8837 0.9422  
MODULE\_105 -0.55 -0.13 0.22 -0.45 -1.61 -1.62 0.05 -0.04 0.21 0.85 1.28 0.84 0.94 0.06 0.69 -0.43 0.17 -0.19 0.61 0.67 0.55 0.47 0.77 0.79 -1.45 -0.83 -0.81 -0.90 0.17 -0.34 -0.0043 0.0426 0.1449 0.8858 0.9422  
MODULE\_130 0.58 0.67 0.09 -1.06 -0.83 -0.71 -0.31 -0.43 -0.30 -1.09 -0.81 -0.93 0.49 1.19 -0.50 1.38 1.49 1.38 0.76 0.82 -0.20 0.09 0.55 -0.46 -0.25 0.24 -0.28 -0.74 0.16 -0.98 -0.0039 0.0391 0.1323 0.8957 0.9467  
MODULE\_99 -0.12 -0.80 -0.78 1.10 0.76 0.95 1.38 0.79 0.75 -0.11 -0.85 -0.36 0.70 -0.37 0.62 -1.63 -1.03 -1.28 0.73 0.12 0.25 0.34 0.01 0.68 0.46 0.00 0.83 -1.13 -1.07 -0.96 0.0037 -0.0372 -0.1190 0.9061 0.9517  
MODULE\_98 0.57 0.73 -0.10 0.24 -0.83 -0.54 0.07 0.49 -0.20 0.45 1.00 0.65 0.06 1.09 0.71 -1.53 -1.83 -0.85 0.38 0.59 -0.08 0.60 0.88 -0.14 -0.69 -1.45 -1.32 -0.06 0.52 0.58 -0.0026 0.0260 0.0857 0.9323 0.9660  
MODULE\_8 -0.61 -0.75 -0.68 1.15 0.93 1.25 1.52 1.31 1.01 -0.86 -1.02 -0.68 -0.55 -0.76 -0.56 -0.26 -0.09 -0.23 -0.21 -0.42 -0.55 0.35 0.36 0.30 0.41 0.58 0.53 -0.58 -0.42 -0.49 -0.0020 0.0198 0.0699 0.9447 0.9660  
MODULE\_43 0.24 0.10 0.25 1.60 1.21 1.66 -0.17 0.43 -0.12 -0.73 -0.58 -0.75 -0.66 -0.69 -0.91 0.02 -0.15 -0.60 -0.21 -0.82 -0.86 -0.55 -0.69 -0.56 1.16 1.08 0.68 0.03 0.13 0.46 -0.0019 0.0194 0.0680 0.9462 0.9660  
MODULE\_139 -1.54 -1.44 -1.80 0.47 -0.02 -0.15 0.92 0.52 0.41 -0.49 0.37 1.33 0.08 -0.25 0.10 0.09 0.56 0.71 0.48 0.13 0.05 1.11 0.78 1.00 -0.73 -1.23 -0.32 -0.63 -0.42 -0.06 0.0020 -0.0200 -0.0667 0.9473 0.9660  
MODULE\_86 0.23 0.65 -0.16 0.42 -0.06 0.67 1.28 1.54 1.75 -0.51 -0.69 -0.32 -0.83 -0.83 -0.83 -0.83 -0.42 0.07 0.73 0.97 1.24 1.11 0.25 0.03 -0.29 -0.83 -0.64 -0.63 0.0020 -0.0201 -0.0650 0.9487 0.9660  
MODULE\_157 0.15 0.14 -0.18 0.62 -0.01 0.04 -0.28 -0.98 -0.54 -1.04 -1.31 -0.59 1.31 -0.15 -0.87 1.47 0.92 1.26 1.10 0.89 0.29 -0.26 -1.31 -1.01 0.64 0.38 0.97 -0.78 -0.26 -0.56 0.0010 -0.0097 -0.0312 0.9753 0.9872  
MODULE\_65 -1.28 -1.33 -1.56 -0.24 -0.87 -0.72 -0.20 0.23 -0.19 0.06 0.67 0.50 0.85 0.87 0.41 1.08 0.95 0.82 0.57 0.51 0.57 -0.44 -0.17 -0.47 -0.45 -0.60 -0.96 0.65 0.19 0.55 -0.0005 0.0054 0.0193 0.9847 0.9878  
MODULE\_104 -0.39 -0.45 0.08 -0.36 -0.57 -0.05 -0.56 -0.72 -0.45 0.29 -0.24 -0.52 1.93 1.04 1.26 -0.22 0.26 -0.32 1.98 1.14 0.77 -0.72 -0.53 -0.03 -0.45 0.50 -0.54 -0.72 -0.72 -0.0005 0.0046 0.0154 0.9878 0.9878











ENSP0000034967:R91Q:rs11541171 EAFVQFKDNGGYSAEALR ENSP0000034967 rs11541171 R91Q 91 ENSP0000034967\_r51 4 0 0 0 0 0 4 0 0 0 0

ENSP0000360541:M647V:rs179822 ALEVDFADELEK ENSP0000360541 rs179822 M647V 647 ENSP0000360541\_rs1 11 3 0 0 6 0 0 0 0 0 2
ENSP0000360593:G46W: LVLDVLEWIR ENSP0000360593 G46W 46 ENSP0000360593\_rs4 2 0 2 0 2 0 0 0 0 0 0
ENSP0000360936:A116T: EMDQTMMAANTQK ENSP0000360936 A116T 116 ENSP0000360936\_rs7 2 0 2 0 0 0 0 0 0 0 0
ENSP0000360936:A116T: EMDQTMMAANTQK ENSP0000360936 A116T 116 ENSP0000360936\_rs7 1 0 1 0 1 0 0 0 0 0 0
ENSP0000360936:A116T: EMDQTMMAANTQK ENSP0000360936 A116T 116 ENSP0000360936\_rs7 1 0 1 0 0 0 0 0 0 0 0
ENSP0000361092:J175M:rs886089 KAEAEAMEAQVEVATEPAGACTEPR ENSP0000361092 rs886089 J175M 175 ENSP0000361092\_rs8 4 2 0 0 2 0 0 0 0 0 0
ENSP0000361226:I726V:rs306547 SEYSSGMEADVAK ENSP0000361226 rs306547 I726V 726 ENSP0000361226\_rs3 4 1 0 0 0 0 3 0 0 0 0
ENSP0000361226:I726V:rs306547 SEYSSGMEADVAK ENSP0000361226 rs306547 I726V 726 ENSP0000361226\_rs3 3 1 0 0 0 1 1 0 0 0 0
ENSP0000361883:C228G:rs11207440 ELISGLPSPASGSGPPPPPPPPPPPVSV ENSP0000361883 rs11207440 C228G 228 ENSP0000361883\_rs6 6 1 1 0 0 2 0 0 0 0 2
ENSP0000361883:C235G:rs6665926 ELISGLPSPASGSGPPPPPPPPPPPVSV ENSP0000361883 rs6665926 C235G 235 ENSP0000361883\_rs6 6 1 1 0 0 2 0 0 0 0 2
ENSP0000361883:C246G:rs6665936 ELISGLPSPASGSGPPPPPPPPPPPVSV ENSP0000361883 rs6665936 C246G 246 ENSP0000361883\_rs6 6 1 1 0 0 2 0 0 0 0 2
ENSP0000361883:I244S:rs6665933 ELISGLPSPASGSGPPPPPPPPPPPVSV ENSP0000361883 rs6665933 I244S 244 ENSP0000361883\_rs6 6 1 1 0 0 2 0 0 0 0 2
ENSP0000361883:Y248D:rs6665937 ELISGLPSPASGSGPPPPPPPPPPPVSV ENSP0000361883 rs6665937 Y248D 248 ENSP0000361883\_rs6 6 1 1 0 0 2 0 0 0 0 2
ENSP0000362010:R215C: GFGTDEQAIVDVVANCSNDQR ENSP0000362010 rs2010 R215C 215 ENSP0000362010\_R2: 1 0 0 1 0 0 2 0 0 0 0
ENSP0000362463:E111A:rs4746 ATLELTHNWGTEDDQATSYHNGNSDPI ENSP0000362463 rs4746 E111A 111 ENSP0000362463\_rs4 3 1 0 0 0 0 1 0 1 0 0
ENSP0000362656:L317V:rs583134 LEQNLNGSEEHVQELLK ENSP0000362656 rs583134 L317V 317 ENSP0000362656\_rs5 2 0 0 0 0 1 0 0 0 0 0
ENSP0000362656:L317V:rs583134 LEQNLNGSEEHVQELLK ENSP0000362656 rs583134 L317V 317 ENSP0000362656\_rs5 1 0 0 0 1 0 0 0 0 0 0
ENSP0000362900:G356S:rs2230678 SRKSKSKDKRKRKRKR ENSP0000362900 rs2230678 G356S 356 ENSP0000362900\_rs2 1 1 0 0 0 0 0 0 0 0 0
ENSP0000362900:G356S:rs2230678 SRKSKSKDKRKR KR ENSP0000362900 rs2230678 G356S 356 ENSP0000362900\_rs2 1 0 0 0 0 0 0 0 0 0 1
ENSP0000363055:R187G:rs2241666 TQXQELQDFVQFK ENSP0000363055 rs2241666 R187G 187 ENSP0000363055\_rs2 1 0 0 0 0 0 0 0 0 0 0
ENSP0000363435:A1601P: LQDITPLEER ENSP0000363435 A1601P 1601 ENSP0000363435\_A11 1 0 0 0 1 0 0 0 0 0 0
ENSP0000363642:I406V: KTLFSDSKPLGSEVDVQGLMMMPK ENSP0000363642 I406V 406 ENSP0000363642\_I40 1 1 0 0 0 0 0 0 0 0 0
ENSP0000363761:\_3050:GAAAAA AAKLGGGGKGYK ENSP0000363761 3050 ENSP0000363761\_305 1 1 0 0 0 0 0 0 0 0 0
ENSP0000363827:\_I3264V: LEGDITVLPV ENSP0000363827 I3264V 3264 ENSP0000363827\_I32 3 0 0 0 0 0 0 0 3 0 0
ENSP0000363891:\_3216: AATGATGA>AA DGVGILNRPDQVQVNDLR ENSP0000363891 3216 ENSP0000363891\_32: 1 0 0 0 0 0 0 0 0 0 0
ENSP0000363952:\_L443I: TEVIQIEDLAQVR ENSP0000363952 L443I 443 ENSP0000363952\_L44 4 0 2 2 0 0 0 0 0 0 0
ENSP0000363952:\_L443I: TEVIQIEDLAQVR ENSP0000363952 L443I 443 ENSP0000363952\_L44 2 0 0 2 0 2 0 0 0 0 0
ENSP0000363999:\_L127F:rs8131 DVDFYFNVPIDQR ENSP0000363999 rs8131 L127F 127 ENSP0000363999\_rs8 1 0 0 0 0 0 0 0 0 0 0
ENSP0000364194:G1655:rs11538302 KGDDGGASGGGGGGGGGGGGGGG ENSP0000364194 rs11538302 G1655 165 ENSP0000364194\_rs1 1 0 0 0 0 0 0 0 0 0 1
ENSP0000364354:\_S345T:rs709683 RSMDESJGSGMFSFEK ENSP0000364354 rs709683 S345T 345 ENSP0000364354\_rs7 1 0 0 0 0 0 0 0 0 0 0
ENSP0000364375:\_P759S:rs1661715 TMSDESRV ENSP0000364375 rs1661715 P759S 759 ENSP0000364375\_rs1 3 0 0 0 0 0 0 0 1 0 1
ENSP0000364403:\_M4867L:rs12584 TVSYDTFKRVAELELENK ENSP0000364403 rs12584 M4867L 4867 ENSP0000364403\_rs1 1 0 0 0 0 0 0 0 0 0 1
ENSP0000364403:\_D169Y: TILSVEYDT ENSP0000364403 D169Y 169 ENSP0000364403\_rs1 2 0 2 0 0 0 0 0 0 0 0
ENSP0000364794:\_V440L: NNDLICYWPELLER ENSP0000364794 V440L 440 ENSP0000364794\_V44 2 0 0 0 0 0 0 0 0 0 2
ENSP0000364912:\_L1091P:rs848209 LGEPASVTEGVEVQSK ENSP0000364912 rs848209 L1091P 1091 ENSP0000364912\_rs8 1 0 0 1 0 0 0 0 0 0 0
ENSP0000364986:\_R140Q:rs11580170 QIQEAYEK ENSP0000364986 rs11580170 R140Q 140 ENSP0000364986\_rs1 1 0 0 0 1 0 0 0 0 0 0
ENSP0000365045:\_H311D: DLYTNTVLSGTTMPYGIADR ENSP0000365045 H311D 311 ENSP0000365045\_H3 11 0 0 0 0 3 3 0 0 2 3
ENSP0000365045:\_H311D: DLYTNTVLSGTTMPYGIADR ENSP0000365045 H311D 311 ENSP0000365045\_H3 6 0 0 0 0 2 0 1 0 1 2
ENSP0000365045:\_H311D: DLYTNTVLSGTTMPYGIADR ENSP0000365045 H311D 311 ENSP0000365045\_H3 2 0 0 0 0 0 0 0 0 1 1
ENSP0000365045:\_H311D: DLYTNTVLSGTTMPYGIADR ENSP0000365045 H311D 311 ENSP0000365045\_H3 1 0 0 0 0 0 0 1 0 0 0
ENSP0000365522:\_K201R: DVTLFEGR ENSP0000365522 K201R 201 ENSP0000365522\_K2 1 0 0 0 0 0 1 0 0 0 0
ENSP0000365637:\_E788D: IEDVAVR ENSP0000365637 E788D 788 ENSP0000365637\_K1 1 0 0 1 0 0 0 0 0 0 0
ENSP0000365912:\_M994L:rs12876018 NQKMAQLLVLLGKIINK ENSP0000365912 rs12876018 M994L 994 ENSP0000365912\_rs1 2 0 0 0 0 0 0 0 1 0 1
ENSP0000366863:\_T1147M:rs9600455 NMLPDMNTSEMK ENSP0000366863 rs9600455 T1147M 1147 ENSP0000366863\_rs9 1 0 0 0 0 0 1 0 0 0 0
ENSP0000366871:\_D981E: EYAGFGVYLTGK ENSP0000366871 D981E 981 ENSP0000366871\_H4 5 0 3 2 0 0 0 0 0 0 0
ENSP0000366927:\_V253M:rs4878199 EAEPFQVNIIGYGTGAAIAQHMI ENSP0000366927 rs4878199 V253M 253 ENSP0000366927\_rs2 2 1 0 1 0 0 0 0 0 0 0
ENSP0000366927:\_R107L:rs2073478 LLNLALDPLV ENSP0000366927 rs2073478 R107L 107 ENSP0000366927\_rs2 41 5 3 5 4 6 5 2 5 4 2
ENSP0000366927:\_V253M:rs4878199 EAEPFQVNIIGYGTGAAIAQHMI ENSP0000366927 rs4878199 V253M 253 ENSP0000366927\_rs2 1 0 0 0 0 1 0 0 0 0 0
ENSP0000367263:\_H187Y: YELTEISNVDDTQSK ENSP0000367263 H187Y 187 ENSP0000367263\_rs5 2 0 1 0 0 1 0 0 0 1 0
ENSP0000367265:\_L580V: LGSVLDRLNDR ENSP0000367265 L580V 580 ENSP0000367265\_L5 2 0 0 0 2 0 0 0 0 0 0
ENSP0000367434:\_S1227L: LLSLDLPSTGTQFEAQSR ENSP0000367434 S1227L 1227 ENSP0000367434\_S1 2 1 0 0 0 0 1 0 0 0 0
ENSP0000367715:\_S221G:rs2274305 LPYGLFWDK ENSP0000367715 S221G 221 ENSP0000367715\_rs2 7 0 0 0 0 1 0 0 3 0 3
ENSP0000367727:\_A547V:rs7535528 L1DVLGWEER ENSP0000367727 rs7535528 A547V 547 ENSP0000367727\_rs7 1 1 0 0 0 0 0 0 0 0 0
ENSP0000367992:\_G190E:rs9778 AFSEYLTQDKSK ENSP0000367992 rs9778 G190E 190 ENSP0000367992\_H2 9 0 5 4 0 0 0 0 0 0 0
ENSP0000368699:\_S83N:rs1921 CDEPLNIVR ENSP0000368699 S83N 83 ENSP0000368699\_rs1 11 0 2 2 1 2 0 0 0 4 0
ENSP0000369317:\_I384L: QIEALNLR ENSP0000369317 I384L 384 ENSP0000369317\_R3 1 0 0 0 0 0 0 0 0 0 1
ENSP0000369318:\_L344I: DALFCSLDIHR ENSP0000369318 L344I 344 ENSP0000369318\_rs3 1 0 0 1 0 0 0 0 0 0 0
ENSP0000370460:\_N390S: EDQTLTALQDR ENSP0000370460 N390S 390 ENSP0000370460\_rs7 1 0 1 0 0 0 0 0 0 0 0
ENSP0000370526:\_G424S:rs35143646 LAGSEVPQRR ENSP0000370526 G424S 424 ENSP0000370526\_rs3 7 0 0 0 0 0 0 3 3 1 0
ENSP0000370589:\_V576A:rs5856 EPYSSPEEAAKG ENSP0000370589 rs5856 V576A 576 ENSP0000370589\_rs2 5 0 0 0 0 2 3 0 0 0 0
ENSP0000370589:\_M475T:rs6753 LAAALASSENSSPEECEETSEKPK ENSP0000370589 rs6753 M475T 475 ENSP0000370589\_rs2 25 4 4 4 4 0 0 0 2 2 0
ENSP0000370589:\_A456V: LAVLALASSENSSPEECEETSEKPK ENSP0000370589 A456V 456 ENSP0000370589\_rs5 3 0 0 0 0 3 0 0 0 0 0
ENSP0000370589:\_M475T:rs6753 LAVLALASSENSSPEECEETSEKPK ENSP0000370589 rs6753 M475T 475 ENSP0000370589\_rs5 3 0 0 0 0 0 3 0 0 0 0
ENSP0000370718:\_S228P:rs11553051 HDPIAADTFEDLSDVEGGSEPTQR ENSP0000370718 rs11553051 S228P 228 ENSP0000370718\_S5 1 1 0 0 0 0 0 0 0 0 0
ENSP0000370736:\_R42L: GPDEDLSHLNK ENSP0000370736 R42L 42 ENSP0000370736\_R4: 1 0 1 0 0 0 0 0 0 0 0
ENSP0000370736:\_T220S: LNSGPDVTEGSSIVPQK ENSP0000370736 T220S 220 ENSP0000370736\_T2: 2 0 0 0 0 0 0 0 2 0 0
ENSP0000370968:\_Q8E:rs3809849 DPAPENPSGEGATQSGAR ENSP0000370968 Q8E 8 ENSP0000370968\_RS9: 13 4 2 2 0 0 1 0 0 0 4
ENSP0000370968:\_M1208L:rs9905742 KSAEDTPAEDGTPAATGGSQPPSLGR ENSP0000370968 rs9905742 M1208L 1208 ENSP0000370968\_RS9: 5 0 3 1 0 0 0 0 1 0 0
ENSP0000370968:\_Q8E:rs3809849 DPAPENPSGEGATQSGAR ENSP0000370968 Q8E 8 ENSP0000370968\_RS9: 4 1 1 0 0 0 1 0 0 1 0
ENSP0000370968:\_D1194G: SEDPTPAEGGTGPAATGGSQPPMSGR ENSP0000370968 D1194G 1194 ENSP0000370968\_D1: 1 0 0 0 0 1 0 0 0 0 0
ENSP0000370968:\_M1208L:rs9905742 SEDPTPAEDGTPAATGGSQPPSLGR ENSP0000370968 rs9905742 M1208L 1208 ENSP0000370968\_RS9: 2 0 1 1 0 0 0 0 0 0 0
ENSP0000370968:\_Q8E:rs3809849 KSAEDTPAEDGTPAATGGSQPPSLGR ENSP0000370968 Q8E 8 ENSP0000370968\_RS9: 2 1 0 0 0 0 0 0 0 0 1
ENSP0000370968:\_M1208L:rs9905742 SEDPTPAEDGTPAATGGSQPPSLGR ENSP0000370968 rs9905742 M1208L 1208 ENSP0000370968\_RS9: 1 0 1 0 0 0 0 0 0 0 0
ENSP0000370968:\_Q8E:rs3809849 DPAPENPSGEGATQSGAR ENSP0000370968 Q8E 8 ENSP0000370968\_RS9: 1 0 0 0 0 0 1 0 0 0 0
ENSP0000370968:\_Q8E:rs3809849 DPAPENPSGEGATQSGAR ENSP0000370968 Q8E 8 ENSP0000370968\_RS9: 1 0 0 0 0 0 0 0 0 0 1
ENSP0000371152:\_I109V:rs1049874 VMPQVDEK ENSP0000371152 rs1049874 I109V 109 ENSP0000371152\_rs1 11 1 0 0 2 3 2 0 0 0 0
ENSP0000371152:\_I109V:rs1049874 VMPQVDEK ENSP0000371152 rs1049874 I109V 109 ENSP0000371152\_rs1 1 0 0 0 0 1 0 0 0 0 0
ENSP0000371419:\_L1550P:rs1822135 DMSIPFLVK ENSP0000371419 rs1822135 L1550P 1550 ENSP0000371419\_rs7 8 1 0 0 0 0 0 3 1 0 0
ENSP0000371419:\_A1656P:rs7571 MDDPSIR ENSP0000371419 rs7571 A1656P 1656 ENSP0000371419\_rs7 1 0 0 0 0 0 0 0 0 1 0
ENSP0000371705:\_K142M: EAGITEMVFEQTK ENSP0000371705 K142M 142 ENSP0000371705\_K1: 3 0 0 0 0 0 0 0 0 0 3
ENSP0000371705:\_K142M: EAGITEMVFEQTK ENSP0000371705 K142M 142 ENSP0000371705\_K1: 2 0 0 0 0 0 0 0 0 0 2
ENSP0000371882:\_R282K: SLTNDWKHDLAVK ENSP0000371882 R282K 282 ENSP0000371882\_T2: 1 0 1 0 0 0 0 0 0 0 0
ENSP0000372199:\_V1791L:rs3761342 WVFGLLR ENSP0000372199 rs3761342 V1791L 1791 ENSP0000372199\_rs3 1 1 0 0 0 0 0 0 0 0 0
ENSP0000372221:\_I319V:rs1455555 GVALSNNVHK ENSP0000372221 rs1455555 I319V 319 ENSP0000372221\_rs2 1 0 0 0 0 1 0 0 0 0 0
ENSP0000372805:\_R181Q: ILALANIKR ENSP0000372805 R181Q 181 ENSP0000372805\_R1: 3 1 1 1 0 0 0 0 0 0 0
ENSP0000372819:\_T369A:rs1130838 GGCSCQAASNSAQSGSDESLIACK ENSP0000372819 rs1130838 T369A 369 ENSP0000372819\_rs1 3 0 0 0 1 0 0 0 0 2 0
ENSP0000372819:\_C356S: GGCSCQAASNSAQSGSDESLIACK ENSP0000372819 C356S 356 ENSP0000372819\_rs1 3 0 0 0 1 0 0 0 0 2 0
ENSP0000372819:\_C356S: GGCSCQAASNSAQSGSDESLIACK ENSP0000372819 C356S 356 ENSP0000372819\_rs1 1 0 0 0 0 0 0 0 0 0 0
ENSP0000372819:\_Y123F: MGFCGLDPDR ENSP0000372819 Y123F 123 ENSP0000372819\_rs1 6 0 0 0 0 1 0 2 0 3 0
ENSP0000372819:\_Y123F: MGFCGLDPDR ENSP0000372819 Y123F 123 ENSP0000372819\_rs1 6 1 0 0 0 0 0 0 0 1 4
ENSP0000372819:\_T369A:rs1130838 GGCSCQAASNSAQSGSDESLIACK ENSP0000372819 rs1130838 T369A 369 ENSP0000372819\_rs1 1 0 0 0 0 0 0 0 0 1 0
ENSP0000373317:\_P714L:rs3864017 DGLSVLTQESGQK ENSP0000373317 rs3864017 P714L 714 ENSP0000373317\_rs3 2 0 0 1 1 0 0 0 0 0 0
ENSP0000373933:\_R1482Q: LEEVQPPRR ENSP0000373933 R1482Q 1482 ENSP0000373933\_R1: 1 0 1 0 0 0 0 0 0 0 0
ENSP0000374611:\_P173A:rs7141532 LSLQNILNGLAAAACHR ENSP0000374611 rs7141532 P173A 173 ENSP0000374611\_rs3 1 0 0 0 0 0 0 0 0 0 1
ENSP0000375309:\_W235R: EVQPRQAIAEHRRK ENSP0000375309 W235R 235 ENSP0000375309\_rs3 1 0 0 0 0 1 0 0 0 0 0
ENSP0000375309:\_F207L:rs3993295 LHGHEEAHDLALACK ENSP0000375309 rs3993295 F207L 207 ENSP0000375309\_rs3 7 0 1 0 1 0 2 2 0 0 1
ENSP0000375309:\_V124A:rs3993298 VAAIEALNDGELQK ENSP0000375309 rs3993298 V124A 124 ENSP0000375309\_rs3 120 10 10 8 12 13 16 14 18 10 9
ENSP0000375309:\_V124A:rs3993298 VAAIEALNDGELQK ENSP0000375309 rs3993298 V124A 124 ENSP0000375309\_rs3 17 3 5 1 0 1 3 2 2 0 0
ENSP0000375503:\_V704A: PSADPELALAR ENSP0000375503 V704A 704 ENSP0000375503\_rs1 1 1 0 0 0 0 0 0 0 0 0
ENSP0000375503:\_Q722R: RAAAEAAEAAGIATTGDESDALLK ENSP0000375503 Q722R 722 ENSP0000375503\_rs1 1 0 0 0 0 0 0 0 0 0 1
ENSP0000375881:\_R89L:rs13026692 LQPEPLAMDR ENSP0000375881 rs13026692 R89L 89 ENSP0000375881\_rs1 6 0 0 0 0 6 0 0 0 0 0
ENSP0000375881:\_R89L:rs13026692 DKLPEPLAMDR ENSP0000375881 rs13026692 R89L 89 ENSP0000375881\_rs1 1 0 0 0 0 0 0 0 0 0 0
ENSP0000375881:\_R89L:rs13026692 LQPEPLAMDR ENSP0000375881 rs13026692 R89L 89 ENSP0000375881\_rs1 1 0 0 0 0 1 0 0 0 0 0
ENSP0000376008:\_A150D: YFVEAGDMAYR ENSP0000376008 A150D 150 ENSP0000376008\_R2: 7 0 4 3 0 0 0 0 0 0 0
ENSP0000376008:\_A150D: YFVEAGDMAYR ENSP0000376008 A150D 150 ENSP0000376008\_R2: 5 0 4 1 0 0 0 0 0 0 0
ENSP0000376176:\_R16G: MGCCARALASVLLGRNAAM ENSP0000376176 R16G 16 ENSP0000376176\_R1: 1 0 0 0 0 0 0 0 0 1 0



|                                   |                              |                 |                  |                           |    |   |   |   |   |   |   |   |   |   |   |
|-----------------------------------|------------------------------|-----------------|------------------|---------------------------|----|---|---|---|---|---|---|---|---|---|---|
| ENSP00000376363:A229V:            | LMQGFNEDMVEIAQKQ             | ENSP00000376363 | A229V            | 229 ENSP00000376363_A2:   | 2  | 0 | 0 | 0 | 0 | 0 | 2 | 0 | 0 | 0 | 0 |
| ENSP00000376363:A229V:            | LMQGFNEDMVEIAQKQ             | ENSP00000376363 | A229V            | 229 ENSP00000376363_A2:   | 1  | 0 | 0 | 0 | 0 | 0 | 1 | 0 | 0 | 0 | 0 |
| ENSP00000376363:A229V:            | LMQGFNEDMVEIAQKQ             | ENSP00000376363 | A229V            | 229 ENSP00000376363_A2:   | 1  | 0 | 0 | 0 | 0 | 0 | 1 | 0 | 0 | 0 | 0 |
| ENSP00000376636:L468I:            | SIDPFENSELEER                | ENSP00000376636 | L468I            | 468 ENSP00000376636_L46:  | 1  | 0 | 0 | 0 | 0 | 0 | 1 | 0 | 0 | 0 | 0 |
| ENSP00000376763:T1079A:           | FDVNASAVQVLIIEHIGNLDR        | ENSP00000376763 | T1079A           | 1079 ENSP00000376763_T10: | 2  | 0 | 0 | 2 | 0 | 0 | 0 | 0 | 0 | 0 | 0 |
| ENSP00000377642:D140G:            | EFAQSLGIFLETSAK              | ENSP00000377642 | D140G            | 140 ENSP00000377642_D1:   | 2  | 0 | 2 | 0 | 0 | 0 | 0 | 0 | 0 | 0 | 0 |
| ENSP00000377914:Q52E:rs11557674   | QLLESAAH                     | ENSP00000377914 | rs11557674 Q52E  | 52 ENSP00000377914_rs1:   | 1  | 0 | 0 | 1 | 0 | 0 | 0 | 0 | 0 | 0 | 0 |
| ENSP00000378370:A328T:rs3736238   | IGEAETVIEAMGK                | ENSP00000378370 | rs3736238 A328T  | 328 ENSP00000378370_rs3:  | 3  | 0 | 0 | 0 | 3 | 0 | 0 | 0 | 0 | 0 | 0 |
| ENSP00000378370:A328T:rs3736238   | IGEAETVIEAMGK                | ENSP00000378370 | rs3736238 A328T  | 328 ENSP00000378370_rs3:  | 1  | 0 | 0 | 0 | 1 | 0 | 0 | 0 | 0 | 0 | 0 |
| ENSP00000378729:N55S:             | LSQIGVENTEESR                | ENSP00000378729 | N55S             | 55 ENSP00000378729_N5:    | 2  | 0 | 0 | 0 | 2 | 0 | 0 | 0 | 0 | 0 | 0 |
| ENSP00000379780:E180D:            | MFVLDDADEMLSR                | ENSP00000379780 | E180D            | 180 ENSP00000379780_E18:  | 1  | 0 | 1 | 0 | 0 | 0 | 0 | 0 | 0 | 0 | 0 |
| ENSP00000381351:A990P:            | FKMPSFGVSAPGRSIEASVDVSPPK    | ENSP00000381351 | A990P            | 990 ENSP00000381351_rs9:  | 1  | 0 | 0 | 0 | 1 | 0 | 0 | 0 | 0 | 0 | 0 |
| ENSP00000381351:P989S:            | FKMPSFGVSAPGRSIEASVDVSPPK    | ENSP00000381351 | P989S            | 989 ENSP00000381351_rs9:  | 1  | 0 | 0 | 0 | 1 | 0 | 0 | 0 | 0 | 0 | 0 |
| ENSP00000382241:N1018S:rs7940077  | SISGESATSESEFTLGGDDSGVSMNPAR | ENSP00000382241 | rs7940077 N1018S | 1018 ENSP00000382241_rs1: | 1  | 0 | 0 | 0 | 0 | 1 | 0 | 0 | 0 | 0 | 0 |
| ENSP00000382392:T538M:            | LVPMLDFGQEGFTR               | ENSP00000382392 | T538M            | 538 ENSP00000382392_E68:  | 2  | 0 | 0 | 0 | 2 | 0 | 0 | 0 | 0 | 0 | 0 |
| ENSP00000382695_3732:ATTTTT>ATTTT | RPKSESQGNATKM                | ENSP00000382695 | rs1050409 A73E   | 3732 ENSP00000382695_37:  | 1  | 0 | 0 | 0 | 1 | 0 | 0 | 0 | 0 | 0 | 0 |
| ENSP00000383244:A73E:rs1050409    | EPWVEQEPEYVDR                | ENSP00000383244 | rs1050409 A73E   | 73 ENSP00000383244_rs1:   | 1  | 0 | 0 | 0 | 0 | 0 | 0 | 0 | 0 | 1 | 0 |
| ENSP00000383362:A36S:rs5748469    | VSVVDYVEPSQGTGR              | ENSP00000383362 | rs5748469 A36S   | 36 ENSP00000383362_rs1:   | 4  | 0 | 0 | 0 | 0 | 0 | 0 | 1 | 0 | 3 | 0 |
| ENSP00000384176:T310I:            | DMELPIEK                     | ENSP00000384176 | T310I            | 310 ENSP00000384176_rs1:  | 4  | 0 | 3 | 0 | 0 | 0 | 0 | 0 | 1 | 0 | 0 |
| ENSP00000384176:T310I:            | DMELPIEKVALVK                | ENSP00000384176 | T310I            | 310 ENSP00000384176_rs1:  | 1  | 0 | 1 | 0 | 0 | 0 | 0 | 0 | 0 | 0 | 0 |
| ENSP00000384455:I193T:            | LGTTDDCELVEGLVLTQK           | ENSP00000384455 | I193T            | 193 ENSP00000384455_I19:  | 5  | 0 | 3 | 2 | 0 | 0 | 0 | 0 | 0 | 0 | 0 |
| ENSP00000384455:I193T:            | LGTTDDCELVEGLVLTQK           | ENSP00000384455 | I193T            | 193 ENSP00000384455_I19:  | 3  | 0 | 2 | 1 | 0 | 0 | 0 | 0 | 0 | 0 | 0 |
| ENSP00000385139:R79G:             | ALANVNGSLICNVGAGGPAPAAGAAP   | ENSP00000385139 | R79G             | 79 ENSP00000385139_L11:   | 2  | 0 | 0 | 0 | 0 | 2 | 0 | 0 | 0 | 0 | 0 |
| ENSP00000385139:L110F:            | KEESKESDDDMGFGLFD            | ENSP00000385139 | L110F            | 110 ENSP00000385139_L11:  | 1  | 0 | 0 | 0 | 0 | 1 | 0 | 0 | 0 | 0 | 0 |
| ENSP00000386006:K17M:             | EMEDKVTSPK                   | ENSP00000386006 | K17M             | 17 ENSP00000386006_K1:    | 1  | 0 | 0 | 0 | 1 | 0 | 0 | 0 | 0 | 0 | 0 |
| ENSP00000386423:P150A:rs4832242   | FLEENADVSASEIR               | ENSP00000386423 | rs4832242 P150A  | 150 ENSP00000386423_rs4:  | 3  | 0 | 0 | 0 | 1 | 1 | 0 | 0 | 1 | 0 | 0 |
| ENSP00000386465:N70S:rs11559078   | SQDKDVSSEGETSDGVR            | ENSP00000386465 | rs11559078 N70S  | 70 ENSP00000386465_rs1:   | 1  | 0 | 0 | 1 | 0 | 0 | 0 | 0 | 0 | 0 | 0 |
| ENSP00000386756:L248I:            | GLGTTDDTIIR                  | ENSP00000386756 | L248I            | 248 ENSP00000386756_M2:   | 14 | 0 | 8 | 6 | 0 | 0 | 0 | 0 | 0 | 0 | 0 |
| ENSP00000386813:A852V:rs11542286  | SVVSDVPEELDFLVPK             | ENSP00000386813 | rs11542286 A852V | 852 ENSP00000386813_rs1:  | 1  | 0 | 0 | 0 | 0 | 0 | 0 | 0 | 0 | 0 | 1 |
| ENSP00000387272:A280D:            | SLGGNDELSDTFLEMK             | ENSP00000387272 | A280D            | 280 ENSP00000387272_C1:   | 2  | 0 | 1 | 1 | 0 | 0 | 0 | 0 | 0 | 0 | 0 |

## S12 CO-EXPRESSION MODULE GENES

| Cluster | Ensembl Gene ID | Associated Gene | GO Term Accession (GO Term Name (bp)) | Class                                                     |                                    |
|---------|-----------------|-----------------|---------------------------------------|-----------------------------------------------------------|------------------------------------|
| 40      | ENSG00000178921 | PFAS            | GO:0006164                            | purine nucleotide biosynthetic process                    | DNA/RNA synthesis & repair         |
| 40      | ENSG00000204842 | ATXN2           | GO:0016070                            | RNA metabolic process                                     | DNA/RNA synthesis & repair         |
| 40      | ENSG00000109606 | DHX15           | GO:0006397                            | mRNA processing                                           | DNA/RNA synthesis & repair         |
| 40      | ENSG00000083520 | DIS3            | GO:0006364                            | rRNA processing                                           | DNA/RNA synthesis & repair         |
| 42      | ENSG00000126814 | TRMT5           | GO:0008033                            | tRNA processing                                           | DNA/RNA synthesis & repair         |
| 42      | ENSG00000120800 | UTP20           | GO:0006364                            | rRNA processing                                           | DNA/RNA synthesis & repair         |
| 56      | ENSG00000138772 | ANXA3           | GO:0051054                            | positive regulation of DNA metabolic process              | DNA/RNA synthesis & repair         |
| 75      | ENSG00000135336 | ORC3L           | GO:0006260                            | DNA replication                                           | DNA/RNA synthesis & repair         |
| 75      | ENSG0000020922  | MRE11A          | GO:0006281                            | DNA repair                                                | DNA/RNA synthesis & repair         |
| 75      | ENSG00000104320 | NBN             | GO:0006302                            | double-strand break repair                                | DNA/RNA synthesis & repair         |
| 75      | ENSG00000113522 | RAD50           | GO:0006281                            | DNA repair                                                | DNA/RNA synthesis & repair         |
| 129     | ENSG00000116560 | SFPQ            | GO:0006281                            | DNA repair                                                | DNA/RNA synthesis & repair         |
| 156     | ENSG00000095002 | MSH2            | GO:0006281                            | DNA repair                                                | DNA/RNA synthesis & repair         |
| 156     | ENSG00000104413 | ESRP1           | GO:0043484                            | regulation of RNA splicing                                | DNA/RNA synthesis & repair         |
| 40      | ENSG00000114480 | GBE1            | GO:0005975                            | carbohydrate metabolic process                            | Metabolism process                 |
| 40      | ENSG00000082212 | ME2             | GO:0006108                            | malate metabolic process                                  | Metabolism process                 |
| 40      | ENSG00000146085 | MUT             | GO:0008152                            | metabolic process                                         | Metabolism process                 |
| 40      | ENSG00000178057 | NDUFAF3         | GO:0032981                            | mitochondrial respiratory chain complex I assembly        | Metabolism process                 |
| 40      | ENSG00000152256 | PDK1            | GO:0006006                            | glucose metabolic process                                 | Metabolism process                 |
| 40      | ENSG00000185875 | THNSL1          | GO:0008152                            | metabolic process                                         | Metabolism process                 |
| 42      | ENSG00000110955 | ATP5B           | GO:0006091                            | generation of precursor metabolites and energy            | Metabolism process                 |
| 42      | ENSG00000069998 | CECR5           | GO:0008152                            | metabolic process                                         | Metabolism process                 |
| 42      | ENSG00000115419 | GLS             | GO:0006541                            | glutamine metabolic process                               | Metabolism process                 |
| 42      | ENSG00000083720 | OXCT1           | GO:0008152                            | metabolic process                                         | Metabolism process                 |
| 54      | ENSG00000159228 | CBR1            | GO:0008152                            | metabolic process                                         | Metabolism process                 |
| 54      | ENSG00000159231 | CBR3            | GO:0008152                            | metabolic process                                         | Metabolism process                 |
| 54      | ENSG00000095321 | CRAT            | GO:0006091                            | generation of precursor metabolites and energy            | Metabolism process                 |
| 108     | ENSG00000122873 | CISD1           | GO:0043457                            | regulation of cellular respiration                        | Metabolism process                 |
| 129     | ENSG00000100889 | PCK2            | GO:0006094                            | gluconeogenesis                                           | Metabolism process                 |
| 156     | ENSG00000150768 | DLAT            | GO:0008152                            | metabolic process                                         | Metabolism process                 |
| 40      | ENSG00000162191 | UBXN1           | GO:0043161                            | proteasomal ubiquitin-dependent protein catabolic process | Protein turnover/folding/transport |
| 40      | ENSG00000104325 | DECR1           | GO:0051289                            | protein homotetramerization                               | Protein turnover/folding/transport |
| 40      | ENSG00000126602 | TRAP1           | GO:0006457                            | protein folding                                           | Protein turnover/folding/transport |
| 40      | ENSG00000140598 | EFTUD1          | GO:0006412                            | translation                                               | Protein turnover/folding/transport |
| 40      | ENSG00000079805 | DNM2            | GO:0006892                            | post-Golgi vesicle-mediated transport                     | Protein turnover/folding/transport |
| 54      | ENSG00000105402 | NAPA            | GO:0006886                            | intracellular protein transport                           | Protein turnover/folding/transport |
| 54      | ENSG00000138297 | TIMM23          | GO:0015031                            | protein transport                                         | Protein turnover/folding/transport |
| 56      | ENSG00000176978 | DPP7            | GO:0006508                            | proteolysis                                               | Protein turnover/folding/transport |
| 56      | ENSG00000120694 | HSPH1           | GO:0006986                            | response to unfolded protein                              | Protein turnover/folding/transport |
| 56      | ENSG00000072274 | TRFC            | GO:0006508                            | proteolysis                                               | Protein turnover/folding/transport |
| 56      | ENSG00000074695 | LMAN1           | GO:0006457                            | protein folding                                           | Protein turnover/folding/transport |
| 56      | ENSG00000165813 | C10orf118       | GO:0006412                            | translation                                               | Protein turnover/folding/transport |
| 75      | ENSG00000173486 | FKBP2           | GO:0006457                            | protein folding                                           | Protein turnover/folding/transport |
| 108     | ENSG00000004478 | FKBP4           | GO:0006457                            | protein folding                                           | Protein turnover/folding/transport |
| 129     | ENSG00000147475 | ERLIN2          | GO:0030433                            | ER-associated protein catabolic process                   | Protein turnover/folding/transport |
| 129     | ENSG00000106077 | ABHD11          | GO:0006886                            | intracellular protein transport                           | Protein turnover/folding/transport |
| 152     | ENSG00000147010 | SH3KBP1         | GO:0006897                            | endocytosis                                               | Protein turnover/folding/transport |
| 156     | ENSG00000109501 | WFS1            | GO:0022417                            | protein maturation by protein folding                     | Protein turnover/folding/transport |
| 40      | ENSG00000111530 | CAND1           | GO:0045449                            | regulation of transcription                               | Transcription regulation           |
| 40      | ENSG00000079805 | DNM2            | GO:0045449                            | regulation of transcription                               | Transcription regulation           |
| 42      | ENSG00000067334 | DNTTIP2         | GO:0045449                            | regulation of transcription                               | Transcription regulation           |
| 42      | ENSG00000121390 | PSPC1           | GO:0045449                            | regulation of transcription                               | Transcription regulation           |
| 54      | ENSG00000088992 | TESC            | GO:0043193                            | positive regulation of gene-specific transcription        | Transcription regulation           |
| 56      | ENSG00000138772 | ANXA3           | GO:0051091                            | positive regulation of transcription factor activity      | Transcription regulation           |
| 56      | ENSG00000117713 | ARID1A          | GO:0045449                            | regulation of transcription                               | Transcription regulation           |
| 75      | ENSG00000155508 | CNOT8           | GO:0006355                            | regulation of transcription, DNA-dependent                | Transcription regulation           |
| 108     | ENSG00000132382 | MYBBP1A         | GO:0006355                            | regulation of transcription, DNA-dependent                | Transcription regulation           |
| 129     | ENSG00000116560 | SFPQ            | GO:0045449                            | regulation of transcription                               | Transcription regulation           |
| 40      | ENSG00000114023 | FAM162A         |                                       |                                                           | Unmapped                           |
| 42      | ENSG00000079819 | EPB41L2         |                                       |                                                           | Unmapped                           |
| 54      | ENSG00000180921 | FAM83H          |                                       |                                                           | Unmapped                           |
| 54      | ENSG00000008394 | MGST1           |                                       |                                                           | Unmapped                           |
| 54      | ENSG00000176422 | SPRYD4          |                                       |                                                           | Unmapped                           |
| 56      | ENSG00000175866 | BAIAP2          |                                       |                                                           | Unmapped                           |
| 56      | ENSG00000177106 | EPS8L2          |                                       |                                                           | Unmapped                           |
| 56      | ENSG00000167468 | GPX4            |                                       |                                                           | Unmapped                           |
| 75      | ENSG00000166145 | SPINT1          |                                       |                                                           | Unmapped                           |
| 108     | ENSG00000178425 | NT5DC1          |                                       |                                                           | Unmapped                           |
| 108     | ENSG00000124570 | SERPINB6        |                                       |                                                           | Unmapped                           |
| 108     | ENSG00000138279 | ANXA7           |                                       |                                                           | Unmapped                           |
| 129     | ENSG00000010278 | CD9             |                                       |                                                           | Unmapped                           |
| 129     | ENSG00000184897 | H1FX            |                                       |                                                           | Unmapped                           |
| 152     | ENSG00000057019 | DCBLD2          |                                       |                                                           | Unmapped                           |
| 152     | ENSG00000147065 | MSN             |                                       |                                                           | Unmapped                           |
| 152     | ENSG00000147394 | ZNF185          |                                       |                                                           | Unmapped                           |
| 156     | ENSG00000163686 | ABHD6           |                                       |                                                           | Unmapped                           |
| 156     | ENSG00000117868 | FAM62B          |                                       |                                                           | Unmapped                           |
