# Supplementary material
Source: PubMed Central journal article supplement (PMC3896054)
Supplement: NIHMS543571-supplement-3.pdf [file NIHMS543571-supplement-3.pdf]

## STANDARD SEARCH

| Proteins                            | ENSG               | HGNC     | TotalCounts | CaCc | CaCc | CaCc | COL1 | COL1 | COL1 | HT21 | HT21 | HT21 | SW4 | SW4 | SW4 | DLD | DLD | DLD | HCT | HCT | HCT | HCT | HCT | HCT | LoVc | LoVc | LoVc | LS17 | LS17 | LS17 | RKO | RKO | RKO |   |
|-------------------------------------|--------------------|----------|-------------|------|------|------|------|------|------|------|------|------|-----|-----|-----|-----|-----|-----|-----|-----|-----|-----|-----|-----|------|------|------|------|------|------|-----|-----|-----|---|
| ENSP00000000233                     | ENSG000000004059   | ARF5     | 292         | 20   | 9    | 9    | 7    | 11   | 8    | 12   | 6    | 7    | 1   | 11  | 3   | 10  | 6   | 6   | 8   | 10  | 12  | 11  | 16  | 11  | 6    | 9    | 6    | 7    | 20   | 6    | 13  | 20  | 11  |   |
| ENSP000000000412                    | ENSG000000003056   | M6PR     | 95          | 8    | 5    | 3    | 3    | 2    | 1    | 2    | 3    | 5    | 4   | 5   | 3   | 2   | 0   | 4   | 0   | 5   | 2   | 2   | 8   | 2   | 2    | 2    | 3    | 2    | 4    | 1    | 6   | 4   | 2   |   |
| ENSP000000001008                    | ENSG0000000004478  | FKBP4    | 544         | 27   | 20   | 17   | 8    | 13   | 16   | 19   | 5    | 21   | 6   | 10  | 5   | 5   | 6   | 9   | 25  | 17  | 29  | 22  | 32  | 25  | 17   | 27   | 17   | 18   | 31   | 17   | 26  | 24  | 30  |   |
| ENSP000000002125,ENSP0000000003509  | ENSG0000000003509  | C2orf56  | 24          | 0    | 0    | 2    | 1    | 1    | 0    | 2    | 1    | 1    | 0   | 2   | 3   | 1   | 0   | 1   | 0   | 0   | 1   | 0   | 0   | 1   | 1    | 0    | 0    | 1    | 0    | 0    | 1   | 1   | 3   |   |
| ENSP000000002165                    | ENSG000000001036   | FUCA2    | 64          | 1    | 2    | 0    | 2    | 2    | 0    | 2    | 2    | 0    | 2   | 1   | 3   | 2   | 4   | 6   | 2   | 4   | 2   | 3   | 3   | 1   | 2    | 2    | 1    | 7    | 3    | 3    | 1   | 1   | 0   |   |
| ENSP000000003100                    | ENSG000000001630   | CYP51A1  | 330         | 22   | 13   | 10   | 6    | 5    | 6    | 11   | 8    | 13   | 6   | 16  | 10  | 11  | 7   | 11  | 9   | 9   | 11  | 9   | 12  | 7   | 11   | 18   | 10   | 11   | 22   | 11   | 11  | 13  | 11  |   |
| ENSP000000003302                    | ENSG0000000048028  | USD8     | 31          | 4    | 0    | 0    | 0    | 0    | 1    | 1    | 1    | 1    | 2   | 2   | 2   | 1   | 2   | 0   | 0   | 1   | 0   | 1   | 0   | 2   | 1    | 0    | 1    | 0    | 3    | 1    | 1   | 2   | 1   |   |
| ENSP000000003607                    | ENSG000000004142   | POLDIP2  | 118         | 7    | 5    | 5    | 3    | 4    | 3    | 6    | 3    | 2    | 2   | 3   | 2   | 2   | 3   | 5   | 5   | 3   | 2   | 4   | 6   | 2   | 2    | 5    | 2    | 6    | 9    | 2    | 6   | 5   | 4   |   |
| ENSP000000004980                    | ENSG0000000079387  | SENP1    | 28          | 0    | 1    | 0    | 1    | 0    | 0    | 1    | 0    | 2    | 0   | 1   | 1   | 0   | 0   | 2   | 0   | 0   | 1   | 2   | 0   | 0   | 0    | 1    | 1    | 5    | 3    | 2    | 0   | 2   | 2   |   |
| ENSP000000005226                    | ENSG0000000006611  | USH1C    | 17          | 0    | 0    | 1    | 4    | 1    | 3    | 3    | 0    | 2    | 0   | 0   | 0   | 0   | 0   | 0   | 0   | 1   | 0   | 0   | 0   | 0   | 0    | 0    | 0    | 0    | 0    | 2    | 0   | 0   | 0   |   |
| ENSP000000005257                    | ENSG0000000006451  | RALA     | 100         | 6    | 3    | 3    | 2    | 2    | 1    | 6    | 6    | 1    | 3   | 5   | 2   | 3   | 3   | 3   | 2   | 2   | 1   | 1   | 2   | 2   | 10   | 5    | 3    | 5    | 6    | 2    | 5   | 3   | 2   |   |
| ENSP000000005259                    | ENSG0000000075790  | BCAP29   | 23          | 1    | 0    | 0    | 0    | 0    | 0    | 1    | 1    | 1    | 2   | 1   | 2   | 0   | 0   | 0   | 0   | 0   | 0   | 1   | 1   | 0   | 3    | 2    | 2    | 0    | 0    | 0    | 2   | 0   | 3   |   |
| ENSP000000005260                    | ENSG0000000006453  | BAIAP2L1 | 111         | 3    | 3    | 3    | 3    | 3    | 0    | 9    | 7    | 4    | 1   | 4   | 3   | 4   | 8   | 3   | 0   | 5   | 3   | 4   | 5   | 3   | 4    | 10   | 3    | 4    | 6    | 4    | 1   | 1   | 0   |   |
| ENSP000000005340                    | ENSG0000000004975  | DVL2     | 11          | 0    | 0    | 0    | 2    | 0    | 1    | 1    | 0    | 0    | 0   | 0   | 0   | 1   | 1   | 0   | 0   | 0   | 2   | 2   | 0   | 0   | 0    | 0    | 0    | 0    | 0    | 1    | 0   | 0   | 0   |   |
| ENSP000000005386                    | ENSG0000000005386  | RPAP3    | 163         | 10   | 6    | 9    | 4    | 1    | 0    | 6    | 3    | 3    | 0   | 5   | 1   | 7   | 5   | 7   | 7   | 6   | 2   | 12  | 8   | 10  | 3    | 7    | 4    | 9    | 9    | 0    | 8   | 5   | 6   |   |
| ENSP000000005558,ENSP0000000006652  | ENSG0000000006652  | IFRD1    | 13          | 1    | 0    | 1    | 0    | 1    | 0    | 0    | 1    | 0    | 1   | 1   | 0   | 1   | 0   | 0   | 0   | 0   | 0   | 0   | 0   | 0   | 2    | 1    | 0    | 0    | 0    | 0    | 1   | 1   | 1   |   |
| ENSP000000005905,ENSP0000000007202  | ENSG0000000007202  | KIAA0100 | 11          | 1    | 0    | 0    | 0    | 0    | 3    | 0    | 0    | 0    | 0   | 1   | 1   | 0   | 1   | 0   | 0   | 0   | 0   | 0   | 0   | 0   | 1    | 0    | 0    | 0    | 0    | 0    | 2   | 0   | 1   |   |
| ENSP000000006951                    | ENSG0000000007168  | PAFAH1B1 | 168         | 11   | 8    | 2    | 7    | 5    | 10   | 7    | 3    | 4    | 0   | 8   | 5   | 5   | 3   | 5   | 5   | 3   | 10  | 10  | 7   | 7   | 1    | 3    | 1    | 6    | 6    | 7    | 4   | 9   | 6   |   |
| ENSP000000007516                    | ENSG0000000004779  | NDUFAB1  | 195         | 10   | 4    | 2    | 1    | 3    | 11   | 6    | 2    | 3    | 0   | 16  | 8   | 8   | 1   | 5   | 11  | 5   | 5   | 5   | 8   | 5   | 7    | 10   | 5    | 8    | 12   | 6    | 6   | 14  | 8   |   |
| ENSP000000007633,ENSP0000000006534  | ENSG0000000006534  | ALDH3B1  | 16          | 1    | 0    | 0    | 0    | 1    | 1    | 2    | 3    | 2    | 0   | 0   | 0   | 0   | 1   | 0   | 1   | 1   | 0   | 1   | 0   | 1   | 1    | 0    | 0    | 0    | 0    | 0    | 0   | 0   | 0   | 0 |
| ENSP000000007699                    | ENSG0000000006047  | YBX2     | 151         | 7    | 4    | 4    | 2    | 11   | 2    | 4    | 2    | 3    | 3   | 7   | 7   | 1   | 8   | 4   | 4   | 6   | 6   | 4   | 5   | 9   | 4    | 4    | 5    | 4    | 5    | 7    | 3   | 8   | 8   | 7 |
| ENSP000000007722                    | ENSG0000000005884  | ITGA3    | 95          | 0    | 0    | 0    | 3    | 1    | 1    | 6    | 1    | 2    | 0   | 6   | 6   | 5   | 1   | 5   | 9   | 15  | 8   | 8   | 4   | 4   | 2    | 2    | 1    | 3    | 1    | 1    | 0   | 0   | 0   |   |
| ENSP000000009041,ENSP00000000010270 | ENSG00000000010270 | STARD3N1 | 13          | 0    | 1    | 0    | 2    | 0    | 1    | 1    | 0    | 1    | 0   | 1   | 1   | 0   | 0   | 0   | 0   | 0   | 0   | 0   | 0   | 0   | 1    | 0    | 0    | 0    | 0    | 0    | 0   | 1   | 1   | 1 |
| ENSP000000009589                    | ENSG0000000008988  | RP520    | 72          | 3    | 2    | 4    | 0    | 3    | 1    | 2    | 0    | 2    | 1   | 3   | 2   | 3   | 2   | 4   | 3   | 1   | 3   | 2   | 2   | 4   | 2    | 2    | 2    | 4    | 2    | 3    | 4   | 3   | 3   |   |
| ENSP000000010299,ENSP0000000009780  | ENSG0000000009780  | FAM76A   | 11          | 2    | 0    | 0    | 1    | 1    | 0    | 2    | 0    | 0    | 1   | 0   | 1   | 1   | 0   | 0   | 0   | 0   | 0   | 0   | 0   | 0   | 1    | 0    | 0    | 0    | 0    | 0    | 0   | 0   | 0   | 0 |
| ENSP000000010404,ENSP0000000008394  | ENSG0000000008394  | MGST1    | 76          | 5    | 2    | 2    | 3    | 7    | 2    | 3    | 3    | 2    | 0   | 1   | 1   | 2   | 1   | 1   | 1   | 2   | 1   | 3   | 3   | 1   | 2    | 5    | 3    | 4    | 6    | 2    | 3   | 3   | 2   |   |
| ENSP000000011473                    | ENSG0000000008282  | SYPL1    | 10          | 0    | 1    | 0    | 0    | 1    | 1    | 0    | 0    | 0    | 0   | 1   | 1   | 0   | 0   | 0   | 0   | 0   | 1   | 0   | 0   | 0   | 0    | 1    | 1    | 0    | 0    | 0    | 0   | 1   | 1   | 0 |
| ENSP000000011619                    | ENSG00000000010017 | RANBP9   | 35          | 1    | 3    | 1    | 1    | 2    | 1    | 1    | 0    | 1    | 1   | 1   | 0   | 3   | 1   | 1   | 2   | 2   | 2   | 3   | 2   | 2   | 2    | 0    | 0    | 0    | 0    | 0    | 2   | 0   | 0   | 0 |
| ENSP000000011700,ENSP00000000048707 | ENSG00000000048707 | VPS13D   | 13          | 0    | 0    | 0    | 0    | 0    | 0    | 0    | 0    | 1    | 0   | 2   | 0   | 0   | 1   | 0   | 0   | 2   | 0   | 0   | 1   | 1   | 1    | 0    | 0    | 0    | 0    | 0    | 1   | 1   | 2   | 0 |
| ENSP000000012443                    | ENSG00000000011485 | PP5C     | 178         | 9    | 8    | 5    | 6    | 5    | 5    | 6    | 4    | 11   | 1   | 5   | 2   | 3   | 3   | 6   | 6   | 10  | 10  | 11  | 5   | 7   | 1    | 3    | 5    | 8    | 9    | 6    | 6   | 7   | 5   |   |
| ENSP000000013070                    | ENSG0000000012963  | UBR7     | 73          | 3    | 0    | 2    | 4    | 3    | 4    | 4    | 0    | 1    | 1   | 4   | 0   | 3   | 2   | 1   | 2   | 1   | 2   | 4   | 4   | 2   | 1    | 1    | 0    | 4    | 2    | 2    | 4   | 6   | 6   |   |
| ENSP000000014930                    | ENSG0000000013583  | HEBP1    | 118         | 7    | 4    | 5    | 3    | 3    | 3    | 2    | 1    | 2    | 2   | 2   | 3   | 4   | 5   | 3   | 1   | 5   | 4   | 7   | 5   | 3   | 4    | 6    | 4    | 6    | 7    | 5    | 5   | 3   | 4   |   |
| ENSP000000016946,ENSP0000000183054  | ENSG0000000183054  | RGPD6    | 264         | 14   | 10   | 8    | 7    | 7    | 7    | 6    | 6    | 6    | 5   | 16  | 10  | 9   | 12  | 9   | 7   | 8   | 11  | 7   | 9   | 5   | 11   | 16   | 6    | 8    | 10   | 7    | 5   | 13  | 9   |   |
| ENSP000000017003                    | ENSG0000000015532  | XYLT2    | 13          | 0    | 2    | 1    | 1    | 1    | 0    | 1    | 1    | 0    | 0   | 0   | 0   | 0   | 0   | 0   | 0   | 0   | 1   | 2   | 1   | 1   | 1    | 1    | 0    | 0    | 0    | 0    | 0   | 0   | 0   | 0 |
| ENSP000000019317,ENSP00000000017797 | ENSG00000000017797 | RALBP1   | 17          | 0    | 2    | 1    | 1    | 1    | 0    | 0    | 0    | 0    | 0   | 0   | 0   | 0   | 2   | 1   | 1   | 0   | 1   | 0   | 3   | 0   | 0    | 0    | 0    | 1    | 0    | 0    | 1   | 0   | 1   | 1 |
| ENSP000000022615                    | ENSG0000000078668  | VDAC3    | 170         | 7    | 7    | 2    | 7    | 14   | 6    | 3    | 2    | 1    | 3   | 6   | 5   | 4   | 2   | 6   | 5   | 6   | 8   | 4   | 4   | 7   | 4    | 7    | 5    | 6    | 8    | 9    | 5   | 10  | 7   |   |
| ENSP000000023939,ENSP0000000002277  | ENSG0000000002277  | C2orf43  | 86          | 6    | 2    | 4    | 4    | 4    | 4    | 4    | 5    | 4    | 1   | 1   | 2   | 2   | 2   | 3   | 2   | 3   | 1   | 2   | 6   | 3   | 0    | 4    | 2    | 2    | 3    | 2    | 5   | 1   | 2   |   |
| ENSP000000025008                    | ENSG0000000023287  | RB1CC1   | 14          | 2    | 0    | 0    | 1    | 0    | 1    | 2    | 1    | 0    | 1   | 0   | 0   | 0   | 0   | 0   | 1   | 0   | 1   | 0   | 0   | 1   | 0    | 0    | 0    | 0    | 0    | 0    | 1   | 0   | 1   | 0 |
| ENSP000000025399                    | ENSG0000000023734  | STRAP    | 354         | 19   | 12   | 13   | 7    | 10   | 11   | 11   | 9    | 5    | 4   | 14  | 8   | 11  | 7   | 10  | 11  | 15  | 13  | 7   | 21  | 15  | 7    | 17   | 8    | 18   | 18   | 8    | 20  | 15  | 10  |   |
| ENSP000000025429                    | ENSG0000000023697  | DERA     | 62          | 2    | 2    | 4    | 3    | 4    | 3    | 2    | 2    | 3    | 0   | 1   | 1   | 2   | 3   | 0   | 3   | 2   | 0   | 1   | 4   | 1   | 3    | 2    | 0    | 3    | 2    | 2    | 2   | 2   | 2   | 2 |
| ENSP000000027335                    | ENSG0000000079112  | CDH17    | 176         | 14   | 9    | 8    | 6    | 5    | 6    | 0    | 0    | 0    | 0   | 0   | 0   | 6   | 3   | 0   | 0   | 0   | 2   | 1   | 3   | 0   | 0    | 17   | 18   | 20   | 18   | 22   | 21  | 0   | 0   | 0 |
| ENSP000000028008                    | ENSG0000000026297  | RNASET2  | 69          | 2    | 1    | 1    | 2    | 3    | 1    | 8    | 5    | 6    | 2   | 2   | 2   | 1   | 2   | 2   | 3   | 1   | 2   | 1   | 3   | 2   | 3    | 2    | 4    | 2    | 1    | 1    | 4   | 1   | 1   | 0 |
| ENSP000000031135,ENSP00000000029363 | ENSG00000000029363 | BCLAF1   | 221         | 8    | 4    | 8    | 4    | 7    | 4    | 8    | 4    | 5    | 7   | 14  | 5   | 5   | 4   | 8   | 5   | 8   | 4   | 9   | 8   | 5   | 5    | 14   | 11   | 7    | 16   | 7    | 8   | 12  | 7   |   |
| ENSP000000037243                    | ENSG0000000034713  | GABARAP  | 13          | 1    | 0    | 0    | 1    | 1    | 0    | 1    | 0    | 0    | 0   | 0   | 0   | 1   | 0   | 0   | 0   | 0   | 0   | 1   | 0   | 1   | 0    | 0    | 0    | 0    | 1    | 0    | 1   | 1   | 1   | 1 |
| ENSP000000037869                    | ENSG0000000035141  | FAM136A  | 85          | 4    | 2    | 0    | 0    | 0    | 2    | 2    | 0    | 0    | 2   | 4   | 4   | 1   | 4   | 6   | 1   | 7   | 4   | 6   | 1   | 2   | 2    | 4    | 3    | 2    | 5    | 5    | 2   | 2   | 2   | 2 |
| ENSP000000038176                    | ENSG0000000035681  | NSMAF    | 10          | 0    | 0    | 0    | 0    | 0    | 0    | 0    | 0    | 0    | 1   | 2   | 0   | 0   | 0   | 0   | 1   | 1   | 0   | 0   | 0   | 0   | 0    | 0    | 0    | 0    | 0    | 2    | 0   | 1   | 0   | 2 |
| ENSP000000040663                    | ENSG0000000037757  | MR1      | 47          | 5    | 2    | 3    | 4    | 5    | 4    | 2    | 0    | 0    | 1   | 0   | 1   | 0   | 0   | 0   | 2   | 0   | 1   | 0   | 0   | 0   | 2    | 0    | 0    | 3    | 1    | 2    | 5   | 2   | 2   | 2 |
| ENSP000000040738                    | ENSG0000000038219  | BOD1L    | 89          | 7    | 3    | 4    | 1    | 1    | 1    | 1    | 4    | 2    | 3   | 5   | 3   | 2   | 2   | 3   | 3   | 1   | 4   | 2   | 6   | 6   | 3    | 6    | 3    | 4    | 1    | 3    | 0   | 4   | 2   | 0 |
| ENSP000000040877                    | ENSG0000000059588  | TARBP1   | 14          | 1    | 3    | 0    | 1    | 0    | 0    | 1    | 0    | 1    | 0   | 2   | 1   | 0   | 0   | 0   | 0   | 0   | 0   | 0   | 1   | 0   | 0    | 0    | 1    | 0    |      |      |     |     |     |   |

|                            |                  |          |     |    |    |    |    |    |    |    |    |    |    |    |    |    |    |    |    |    |    |    |    |    |    |    |    |    |    |    |    |    |    |   |   |
|----------------------------|------------------|----------|-----|----|----|----|----|----|----|----|----|----|----|----|----|----|----|----|----|----|----|----|----|----|----|----|----|----|----|----|----|----|----|---|---|
| ENSP00000196169,ENSP00000: | ENSG000000083544 | TDRD3    | 11  | 0  | 1  | 0  | 0  | 0  | 1  | 0  | 0  | 0  | 0  | 0  | 1  | 2  | 0  | 0  | 0  | 0  | 0  | 1  | 0  | 1  | 0  | 0  | 0  | 1  | 1  | 1  | 0  | 0  | 1  |   |   |
| ENSP00000196371            | ENSG000000083720 | OXCT1    | 167 | 1  | 1  | 0  | 0  | 1  | 2  | 0  | 1  | 0  | 2  | 7  | 5  | 4  | 4  | 4  | 4  | 8  | 3  | 9  | 7  | 7  | 6  | 11 | 4  | 15 | 9  | 11 | 14 | 17 | 10 |   |   |
| ENSP00000196551            | ENSG000000083455 | RP55     | 182 | 12 | 6  | 3  | 0  | 3  | 6  | 5  | 4  | 5  | 2  | 16 | 5  | 4  | 3  | 6  | 7  | 5  | 8  | 4  | 3  | 4  | 1  | 12 | 5  | 4  | 9  | 6  | 8  | 19 | 7  |   |   |
| ENSP00000198765            | ENSG000000085719 | CPNE3    | 165 | 4  | 6  | 4  | 3  | 3  | 4  | 3  | 2  | 3  | 3  | 7  | 3  | 5  | 3  | 5  | 9  | 11 | 7  | 6  | 10 | 6  | 2  | 5  | 3  | 6  | 8  | 3  | 8  | 14 | 9  |   |   |
| ENSP00000198767            | ENSG000000085721 | RRN3     | 33  | 2  | 1  | 2  | 1  | 3  | 1  | 1  | 0  | 2  | 2  | 1  | 1  | 0  | 0  | 2  | 0  | 2  | 0  | 1  | 2  | 0  | 0  | 1  | 0  | 1  | 4  | 0  | 2  | 0  | 1  |   |   |
| ENSP00000198939            | ENSG000000085872 | CHERP    | 57  | 3  | 2  | 0  | 2  | 2  | 3  | 2  | 1  | 1  | 0  | 4  | 2  | 2  | 0  | 4  | 2  | 2  | 3  | 1  | 2  | 1  | 2  | 5  | 1  | 3  | 1  | 3  | 0  | 2  | 1  |   |   |
| ENSP00000199320            | ENSG000000086189 | DIMT1L   | 60  | 3  | 1  | 3  | 2  | 2  | 1  | 1  | 1  | 1  | 2  | 1  | 0  | 2  | 2  | 1  | 1  | 3  | 1  | 2  | 3  | 2  | 3  | 2  | 2  | 1  | 1  | 1  | 5  | 6  | 4  |   |   |
| ENSP00000199448            | ENSG000000086289 | EPDR1    | 14  | 0  | 0  | 0  | 2  | 0  | 1  | 0  | 0  | 0  | 0  | 2  | 2  | 3  | 0  | 1  | 1  | 0  | 0  | 1  | 0  | 1  | 0  | 0  | 0  | 0  | 0  | 0  | 0  | 0  | 0  |   |   |
| ENSP00000199764            | ENSG000000086548 | CEACAM6  | 30  | 0  | 1  | 0  | 0  | 0  | 0  | 0  | 0  | 0  | 2  | 0  | 0  | 0  | 0  | 0  | 0  | 0  | 0  | 0  | 0  | 0  | 2  | 5  | 8  | 3  | 6  | 3  | 0  | 0  | 0  |   |   |
| ENSP00000199814            | ENSG000000086589 | RBM22    | 81  | 3  | 4  | 2  | 3  | 3  | 2  | 3  | 1  | 2  | 1  | 3  | 3  | 1  | 1  | 2  | 1  | 3  | 2  | 3  | 8  | 2  | 4  | 7  | 2  | 3  | 3  | 2  | 4  | 1  | 2  |   |   |
| ENSP00000200135            | ENSG000000086827 | ZW10     | 95  | 4  | 4  | 5  | 6  | 4  | 3  | 6  | 1  | 5  | 0  | 6  | 2  | 4  | 2  | 4  | 0  | 1  | 3  | 4  | 6  | 3  | 1  | 3  | 2  | 4  | 4  | 1  | 1  | 2  | 4  |   |   |
| ENSP00000200181            | ENSG000001132470 | ITGB4    | 540 | 3  | 3  | 3  | 29 | 55 | 41 | 19 | 14 | 20 | 19 | 42 | 22 | 8  | 11 | 16 | 8  | 23 | 15 | 11 | 12 | 12 | 36 | 39 | 30 | 17 | 23 | 9  | 0  | 0  | 0  |   |   |
| ENSP00000200457            | ENSG000000087077 | TRIP6    | 21  | 2  | 1  | 0  | 0  | 0  | 0  | 0  | 0  | 0  | 0  | 1  | 0  | 0  | 0  | 0  | 1  | 1  | 0  | 0  | 1  | 0  | 0  | 0  | 0  | 1  | 0  | 0  | 2  | 8  | 3  |   |   |
| ENSP00000201586,ENSP00000: | ENSG000000088002 | SULT2B1  | 31  | 0  | 0  | 0  | 2  | 4  | 2  | 4  | 4  | 5  | 0  | 0  | 0  | 2  | 0  | 1  | 0  | 0  | 0  | 2  | 3  | 2  | 0  | 0  | 0  | 0  | 0  | 0  | 0  | 0  | 0  | 0 |   |
| ENSP00000201647            | ENSG000001131037 | EPS8L1   | 76  | 8  | 5  | 7  | 0  | 0  | 0  | 15 | 16 | 14 | 0  | 0  | 0  | 1  | 1  | 0  | 1  | 0  | 0  | 1  | 1  | 1  | 1  | 2  | 1  | 0  | 1  | 0  | 0  | 0  | 0  | 0 |   |
| ENSP00000202017            | ENSG000000088356 | PDRG1    | 27  | 0  | 0  | 2  | 0  | 0  | 1  | 1  | 3  | 2  | 1  | 0  | 0  | 0  | 2  | 2  | 0  | 1  | 1  | 1  | 1  | 2  | 2  | 2  | 0  | 2  | 0  | 0  | 2  | 1  | 0  | 0 |   |
| ENSP00000202028,ENSP00000: | ENSG000000088367 | EPB41L1  | 139 | 14 | 8  | 9  | 6  | 10 | 10 | 7  | 4  | 7  | 3  | 9  | 4  | 5  | 3  | 5  | 3  | 1  | 1  | 1  | 2  | 3  | 5  | 6  | 4  | 0  | 3  | 4  | 1  | 1  | 0  | 0 |   |
| ENSP00000202677            | ENSG000001188559 | RALGAPA  | 17  | 0  | 1  | 0  | 4  | 2  | 0  | 1  | 1  | 1  | 0  | 1  | 0  | 0  | 1  | 0  | 1  | 0  | 1  | 0  | 0  | 1  | 1  | 0  | 0  | 0  | 1  | 0  | 0  | 0  | 0  | 0 |   |
| ENSP00000202773            | ENSG000000089009 | AC004086 | 443 | 17 | 13 | 17 | 7  | 18 | 16 | 12 | 14 | 8  | 16 | 11 | 8  | 16 | 26 | 9  | 5  | 14 | 18 | 13 | 25 | 11 | 20 | 20 | 9  | 18 | 17 | 15 | 19 | 17 | 14 |   |   |
| ENSP00000202816,ENSP00000: | ENSG000000089048 | ESF1     | 88  | 7  | 1  | 3  | 2  | 1  | 0  | 3  | 3  | 0  | 4  | 2  | 1  | 4  | 2  | 0  | 4  | 5  | 4  | 4  | 5  | 0  | 3  | 6  | 3  | 2  | 4  | 1  | 5  | 3  | 6  | 6 |   |
| ENSP00000203001            | ENSG000000089195 | TRMT6    | 76  | 7  | 5  | 2  | 2  | 2  | 3  | 3  | 3  | 2  | 1  | 4  | 2  | 2  | 5  | 3  | 0  | 0  | 2  | 2  | 2  | 2  | 1  | 2  | 2  | 1  | 2  | 1  | 5  | 2  | 6  |   |   |
| ENSP00000203166            | ENSG000000089336 | AC002115 | 25  | 1  | 0  | 1  | 0  | 0  | 1  | 2  | 0  | 0  | 1  | 0  | 0  | 0  | 1  | 0  | 2  | 1  | 0  | 2  | 1  | 2  | 2  | 1  | 1  | 0  | 0  | 2  | 0  | 2  | 1  | 1 |   |
| ENSP00000203407            | ENSG000000010256 | UQCRC1   | 249 | 10 | 5  | 6  | 4  | 7  | 11 | 7  | 6  | 7  | 5  | 11 | 10 | 6  | 5  | 7  | 9  | 9  | 8  | 8  | 9  | 7  | 7  | 12 | 8  | 12 | 15 | 9  | 5  | 17 | 7  | 7 |   |
| ENSP00000203556            | ENSG000000089639 | GMIP     | 18  | 0  | 0  | 0  | 1  | 1  | 1  | 0  | 0  | 1  | 0  | 1  | 0  | 1  | 1  | 0  | 0  | 0  | 0  | 1  | 2  | 0  | 0  | 0  | 1  | 1  | 1  | 0  | 2  | 1  | 2  | 0 |   |
| ENSP00000203630            | ENSG000000089693 | MLF2     | 53  | 3  | 0  | 3  | 3  | 0  | 0  | 0  | 0  | 1  | 0  | 2  | 3  | 1  | 0  | 3  | 2  | 0  | 4  | 1  | 4  | 3  | 1  | 2  | 3  | 1  | 2  | 2  | 0  | 4  | 3  | 2 |   |
| ENSP00000204566            | ENSG000000090487 | SPG21    | 32  | 1  | 0  | 0  | 3  | 1  | 1  | 3  | 1  | 4  | 0  | 1  | 1  | 0  | 1  | 0  | 1  | 0  | 1  | 1  | 1  | 1  | 0  | 2  | 1  | 0  | 3  | 1  | 0  | 1  | 2  | 0 |   |
| ENSP00000204726            | ENSG000000090615 | GOLGA3   | 202 | 5  | 6  | 6  | 5  | 7  | 2  | 8  | 5  | 3  | 4  | 0  | 2  | 5  | 8  | 7  | 5  | 8  | 7  | 4  | 11 | 5  | 12 | 12 | 9  | 12 | 13 | 6  | 9  | 8  | 8  | 8 |   |
| ENSP00000204961            | ENSG000000090776 | EFNB1    | 24  | 0  | 0  | 0  | 1  | 0  | 0  | 4  | 3  | 3  | 2  | 3  | 3  | 0  | 0  | 0  | 0  | 0  | 0  | 0  | 0  | 0  | 2  | 1  | 1  | 1  | 0  | 0  | 0  | 0  | 0  | 0 |   |
| ENSP00000205061            | ENSG000000090863 | GLG1     | 440 | 38 | 26 | 23 | 6  | 9  | 7  | 20 | 17 | 24 | 7  | 7  | 5  | 6  | 8  | 14 | 13 | 28 | 30 | 18 | 13 | 13 | 20 | 22 | 12 | 6  | 12 | 7  | 10 | 8  | 11 |   |   |
| ENSP00000205402            | ENSG000000091140 | DLD      | 457 | 19 | 15 | 10 | 15 | 15 | 18 | 16 | 16 | 15 | 7  | 18 | 19 | 4  | 5  | 11 | 9  | 11 | 18 | 12 | 11 | 11 | 16 | 20 | 20 | 20 | 19 | 19 | 18 | 29 | 21 |   |   |
| ENSP00000205890            | ENSG000000091536 | MYO15A   | 13  | 2  | 0  | 0  | 0  | 1  | 0  | 1  | 0  | 0  | 0  | 0  | 1  | 2  | 0  | 0  | 0  | 0  | 0  | 0  | 1  | 0  | 0  | 1  | 0  | 0  | 3  | 1  | 0  | 0  | 0  | 0 |   |
| ENSP00000206020            | ENSG000000091640 | SPAG7    | 49  | 1  | 0  | 2  | 2  | 3  | 0  | 2  | 1  | 1  | 1  | 1  | 0  | 3  | 4  | 2  | 3  | 3  | 1  | 5  | 5  | 2  | 1  | 0  | 0  | 1  | 0  | 1  | 0  | 1  | 2  | 1 |   |
| ENSP00000206423            | ENSG000000091986 | CCDC80   | 12  | 0  | 1  | 0  | 1  | 0  | 0  | 0  | 0  | 0  | 0  | 1  | 0  | 1  | 0  | 0  | 0  | 0  | 0  | 0  | 0  | 0  | 3  | 0  | 1  | 0  | 1  | 0  | 2  | 0  | 0  | 1 |   |
| ENSP00000206451            | ENSG000000092010 | PSME1    | 588 | 16 | 10 | 14 | 24 | 36 | 22 | 26 | 22 | 22 | 4  | 15 | 12 | 21 | 14 | 14 | 20 | 26 | 12 | 32 | 29 | 17 | 14 | 24 | 15 | 32 | 24 | 16 | 17 | 23 | 15 | 0 |   |
| ENSP00000206474,ENSP00000: | ENSG000000092036 | HAUS4    | 26  | 1  | 2  | 0  | 0  | 2  | 4  | 0  | 0  | 1  | 0  | 0  | 0  | 1  | 1  | 3  | 2  | 1  | 0  | 1  | 5  | 0  | 0  | 0  | 0  | 0  | 0  | 0  | 1  | 1  | 2  | 2 |   |
| ENSP00000206542            | ENSG000000092094 | OSGEP    | 33  | 1  | 1  | 0  | 2  | 2  | 4  | 1  | 0  | 1  | 0  | 0  | 0  | 1  | 2  | 0  | 1  | 0  | 1  | 2  | 2  | 1  | 1  | 0  | 1  | 0  | 2  | 1  | 2  | 2  | 1  | 1 |   |
| ENSP00000207437            | ENSG000001196465 | MYL6B    | 107 | 3  | 5  | 3  | 1  | 3  | 6  | 5  | 5  | 3  | 2  | 2  | 3  | 3  | 3  | 3  | 2  | 2  | 4  | 4  | 3  | 2  | 5  | 4  | 4  | 5  | 4  | 5  | 3  | 6  | 4  | 4 |   |
| ENSP00000207549            | ENSG000000092929 | UNC13D   | 30  | 0  | 1  | 0  | 0  | 0  | 0  | 2  | 0  | 0  | 0  | 0  | 1  | 0  | 6  | 4  | 2  | 0  | 2  | 0  | 5  | 4  | 1  | 0  | 0  | 1  | 0  | 0  | 0  | 1  | 0  | 0 |   |
| ENSP00000209718            | ENSG000001108244 | KRT23    | 178 | 15 | 5  | 8  | 5  | 4  | 2  | 2  | 2  | 1  | 24 | 62 | 47 | 0  | 0  | 0  | 0  | 1  | 0  | 0  | 0  | 0  | 0  | 0  | 0  | 0  | 0  | 0  | 0  | 0  | 0  | 0 | 0 |
| ENSP00000209873            | ENSG000000094914 | AAAS     | 38  | 3  | 0  | 1  | 2  | 2  | 1  | 2  | 2  | 1  | 0  | 1  | 2  | 1  | 1  | 1  | 1  | 1  | 2  | 1  | 1  | 2  | 1  | 2  | 1  | 1  | 0  | 1  | 1  | 1  | 2  | 0 |   |
| ENSP00000209875            | ENSG000000094916 | CBX5     | 326 | 24 | 11 | 12 | 4  | 7  | 5  | 8  | 2  | 4  | 10 | 18 | 13 | 12 | 11 | 16 | 8  | 10 | 8  | 18 | 15 | 13 | 9  | 12 | 14 | 16 | 9  | 10 | 12 | 9  | 9  | 9 |   |
| ENSP00000210060            | ENSG000000095059 | DHPS     | 13  | 0  | 0  | 0  | 0  | 0  | 0  | 0  | 1  | 1  | 0  | 0  | 0  | 0  | 0  | 0  | 1  | 0  | 2  | 2  | 1  | 0  | 1  | 0  | 0  | 1  | 0  | 0  | 1  | 0  | 0  | 1 | 1 |
| ENSP00000210313            | ENSG000000095261 | PSMD5    | 228 | 7  | 6  | 5  | 9  | 8  | 11 | 7  | 7  | 7  | 1  | 3  | 3  | 9  | 6  | 8  | 8  | 5  | 8  | 9  | 4  | 10 | 3  | 6  | 4  | 11 | 12 | 8  | 13 | 16 | 14 | 0 |   |
| ENSP00000210444            | ENSG000000095380 | NANS     | 348 | 7  | 9  | 5  | 9  | 16 | 15 | 12 | 10 | 10 | 4  | 12 | 4  | 9  | 9  | 11 | 12 | 13 | 11 | 13 | 8  | 12 | 8  | 10 | 9  | 22 | 23 | 15 | 18 | 19 | 13 | 0 |   |
| ENSP00000211287,ENSP00000: | ENSG000001156711 | MAPK13   | 60  | 2  | 2  | 2  | 2  | 1  | 1  | 4  | 3  | 2  | 1  | 1  | 2  | 2  | 2  | 1  | 2  | 1  | 1  | 3  | 3  | 3  | 1  | 2  | 1  | 3  | 4  | 3  | 1  | 2  | 2  | 2 |   |
| ENSP00000211402,ENSP00000: | ENSG00000204394  | VAR5     | 125 | 17 | 17 | 18 | 16 | 23 | 17 | 21 | 15 | 17 | 6  | 5  | 5  | 21 | 22 | 16 | 25 | 40 | 28 | 17 | 31 | 19 | 19 | 19 | 12 | 48 | 40 | 23 | 24 | 22 | 22 | 0 |   |
| ENSP00000211998,ENSP00000: | ENSG000000035403 | VCL      | 895 | 46 | 28 | 37 | 23 | 27 | 24 | 12 | 13 | 13 | 14 | 25 | 11 | 39 | 47 | 37 | 31 | 34 | 28 | 42 | 55 | 37 | 25 | 53 | 18 | 37 | 45 | 27 | 22 | 28 | 17 | 0 |   |
| ENSP00000212015            | ENSG000000096717 | SIRT1    | 13  | 2  | 0  | 1  | 0  | 0  | 0  | 0  | 0  | 1  | 0  | 0  | 0  | 1  | 0  | 0  | 1  | 0  | 0  | 1  | 0  | 1  | 1  | 1  | 0  | 0  | 0  | 1  | 0  | 1  | 0  | 1 |   |
| ENSP00000214869            | ENSG000000099203 | TMED1    | 34  | 1  | 3  | 0  | 1  | 1  | 2  | 2  | 0  | 0  | 0  | 1  | 0  | 1  | 0  | 0  | 2  | 2  | 2  | 1  | 2  | 1  | 1  | 1  | 1  | 1  | 3  | 1  | 1  | 0  | 2  | 1 |   |
| ENSP00000215375,ENSP00000: | ENSG000000099624 | ATP5D    | 178 | 9  | 3  | 8  | 6  | 9  | 7  | 5  | 4  | 3  | 6  | 7  | 5  | 4  | 7  | 4  | 4  | 8  | 4  | 7  | 5  | 3  | 5  | 7  | 5  | 7  | 10 | 6  | 6  | 10 |    |   |   |

|                            |                 |          |     |    |    |    |    |    |    |    |    |    |    |    |    |    |    |    |    |    |    |    |    |    |    |    |    |    |    |    |    |    |    |   |
|----------------------------|-----------------|----------|-----|----|----|----|----|----|----|----|----|----|----|----|----|----|----|----|----|----|----|----|----|----|----|----|----|----|----|----|----|----|----|---|
| ENSP00000216639            | ENSG00000100749 | VRK1     | 133 | 3  | 2  | 4  | 4  | 6  | 0  | 3  | 1  | 2  | 6  | 6  | 3  | 4  | 6  | 2  | 8  | 7  | 2  | 5  | 7  | 4  | 5  | 3  | 5  | 7  | 4  | 2  | 10 | 7  | 5  |   |
| ENSP00000216714,ENSP000003 | ENSG00000100823 | APEX1    | 454 | 19 | 19 | 17 | 5  | 11 | 13 | 7  | 11 | 13 | 7  | 21 | 8  | 5  | 15 | 12 | 14 | 12 | 16 | 15 | 22 | 18 | 13 | 22 | 15 | 16 | 26 | 19 | 19 | 26 | 18 |   |
| ENSP00000216727,ENSP000003 | ENSG00000100836 | PABPN1   | 130 | 3  | 3  | 4  | 5  | 8  | 2  | 5  | 3  | 4  | 3  | 5  | 5  | 4  | 5  | 5  | 2  | 4  | 5  | 4  | 6  | 6  | 5  | 6  | 3  | 3  | 4  | 5  | 4  | 5  | 4  |   |
| ENSP00000216774            | ENSG00000100883 | SRP54    | 254 | 14 | 12 | 10 | 5  | 8  | 5  | 7  | 3  | 8  | 2  | 7  | 5  | 11 | 3  | 8  | 11 | 12 | 6  | 11 | 10 | 13 | 5  | 10 | 6  | 8  | 16 | 6  | 12 | 13 | 7  |   |
| ENSP00000216780            | ENSG00000100889 | PCK2     | 456 | 11 | 9  | 8  | 9  | 22 | 15 | 10 | 13 | 8  | 9  | 12 | 8  | 11 | 11 | 11 | 16 | 25 | 15 | 16 | 26 | 19 | 18 | 26 | 15 | 23 | 23 | 16 | 19 | 20 | 12 |   |
| ENSP00000216802,ENSP000003 | ENSG00000100911 | PSME2    | 203 | 7  | 7  | 4  | 6  | 11 | 8  | 9  | 4  | 11 | 1  | 6  | 4  | 2  | 5  | 6  | 5  | 7  | 11 | 5  | 4  | 8  | 6  | 7  | 7  | 6  | 14 | 11 | 7  | 7  | 7  |   |
| ENSP00000216832            | ENSG00000100941 | PNN      | 219 | 7  | 5  | 9  | 3  | 6  | 5  | 5  | 6  | 6  | 13 | 6  | 7  | 1  | 4  | 10 | 4  | 6  | 7  | 7  | 8  | 8  | 16 | 16 | 12 | 6  | 7  | 5  | 6  | 11 | 7  |   |
| ENSP00000216951            | ENSG00000100983 | GSS      | 210 | 10 | 6  | 8  | 5  | 10 | 12 | 7  | 2  | 7  | 2  | 9  | 6  | 4  | 6  | 4  | 8  | 9  | 8  | 8  | 6  | 4  | 1  | 4  | 4  | 7  | 13 | 6  | 11 | 15 | 8  |   |
| ENSP00000216962            | ENSG00000100994 | PYGB     | 754 | 21 | 15 | 14 | 23 | 32 | 37 | 52 | 57 | 67 | 5  | 14 | 8  | 7  | 5  | 7  | 19 | 26 | 20 | 8  | 11 | 8  | 14 | 39 | 20 | 61 | 60 | 55 | 15 | 22 | 12 |   |
| ENSP00000217109            | ENSG00000101138 | CTSF1    | 98  | 6  | 3  | 5  | 2  | 3  | 3  | 2  | 1  | 4  | 6  | 3  | 2  | 2  | 2  | 2  | 5  | 3  | 2  | 1  | 6  | 3  | 3  | 3  | 4  | 5  | 4  | 2  | 3  | 5  | 3  |   |
| ENSP00000217131            | ENSG00000101160 | CTSZ     | 62  | 3  | 3  | 3  | 1  | 2  | 1  | 4  | 6  | 6  | 2  | 6  | 5  | 0  | 0  | 1  | 0  | 1  | 1  | 1  | 0  | 1  | 2  | 2  | 2  | 1  | 3  | 1  | 1  | 1  | 2  |   |
| ENSP00000217289            | ENSG00000101311 | FERMT1   | 75  | 2  | 1  | 0  | 4  | 6  | 9  | 3  | 3  | 2  | 0  | 0  | 3  | 0  | 0  | 0  | 3  | 3  | 1  | 2  | 0  | 0  | 0  | 2  | 2  | 7  | 7  | 6  | 3  | 2  | 4  |   |
| ENSP00000217313            | ENSG00000101335 | MYL9     | 383 | 21 | 17 | 15 | 11 | 19 | 16 | 11 | 3  | 20 | 1  | 7  | 11 | 13 | 5  | 12 | 9  | 14 | 18 | 17 | 9  | 18 | 7  | 13 | 14 | 16 | 16 | 12 | 11 | 16 | 11 |   |
| ENSP00000217372,ENSP000003 | ENSG00000101391 | CDK5RAP  | 17  | 1  | 1  | 4  | 1  | 0  | 0  | 1  | 0  | 0  | 0  | 0  | 1  | 1  | 1  | 0  | 0  | 1  | 0  | 1  | 1  | 0  | 0  | 1  | 0  | 0  | 0  | 0  | 1  | 1  | 0  |   |
| ENSP00000217402            | ENSG00000101421 | CHMP4B   | 145 | 9  | 4  | 8  | 4  | 8  | 6  | 2  | 4  | 4  | 2  | 5  | 5  | 5  | 4  | 4  | 3  | 6  | 2  | 2  | 4  | 4  | 4  | 3  | 4  | 7  | 12 | 3  | 8  | 5  | 4  |   |
| ENSP00000217426            | ENSG00000101444 | AHCY     | 418 | 27 | 36 | 19 | 6  | 13 | 16 | 17 | 3  | 11 | 5  | 19 | 6  | 11 | 5  | 9  | 19 | 20 | 25 | 9  | 12 | 14 | 8  | 9  | 2  | 19 | 29 | 13 | 9  | 15 | 12 |   |
| ENSP00000217455            | ENSG00000101473 | ACOT8    | 10  | 0  | 0  | 0  | 2  | 1  | 1  | 1  | 0  | 0  | 0  | 0  | 1  | 0  | 0  | 0  | 1  | 0  | 0  | 1  | 0  | 0  | 0  | 2  | 0  | 0  | 0  | 0  | 0  | 0  | 0  |   |
| ENSP00000217456            | ENSG00000101474 | C20orf3  | 184 | 13 | 8  | 5  | 5  | 6  | 5  | 6  | 4  | 6  | 4  | 13 | 3  | 8  | 6  | 7  | 5  | 5  | 7  | 5  | 6  | 7  | 3  | 5  | 5  | 4  | 6  | 7  | 4  | 11 | 5  |   |
| ENSP00000217515            | ENSG00000009164 | TXNL1    | 252 | 12 | 3  | 8  | 7  | 6  | 5  | 4  | 9  | 4  | 6  | 5  | 3  | 7  | 15 | 9  | 6  | 11 | 10 | 6  | 13 | 8  | 8  | 10 | 3  | 9  | 16 | 6  | 16 | 14 | 13 |   |
| ENSP00000217901            | ENSG00000067829 | IDH3G    | 67  | 0  | 1  | 0  | 3  | 2  | 2  | 3  | 2  | 3  | 0  | 8  | 3  | 2  | 0  | 1  | 2  | 2  | 2  | 1  | 0  | 0  | 0  | 6  | 4  | 1  | 7  | 2  | 1  | 6  | 3  |   |
| ENSP00000217905            | ENSG00000007350 | TKTL1    | 43  | 3  | 1  | 0  | 3  | 1  | 3  | 3  | 0  | 1  | 0  | 2  | 1  | 0  | 0  | 1  | 1  | 1  | 3  | 3  | 2  | 2  | 2  | 0  | 2  | 1  | 4  | 2  | 1  | 0  | 1  | 1 |
| ENSP00000217958,ENSP000003 | ENSG00000101843 | PSMD10   | 31  | 0  | 1  | 3  | 0  | 3  | 1  | 1  | 1  | 0  | 0  | 1  | 0  | 1  | 1  | 1  | 0  | 2  | 0  | 2  | 1  | 2  | 0  | 0  | 0  | 3  | 1  | 0  | 3  | 1  | 2  |   |
| ENSP00000217961            | ENSG00000101846 | STS      | 19  | 3  | 2  | 1  | 3  | 2  | 4  | 0  | 0  | 0  | 0  | 1  | 0  | 0  | 0  | 0  | 0  | 0  | 0  | 0  | 0  | 0  | 0  | 1  | 1  | 0  | 1  | 0  | 0  | 0  | 0  |   |
| ENSP00000217971            | ENSG00000101856 | PGRMC1   | 177 | 9  | 9  | 4  | 5  | 9  | 5  | 7  | 6  | 9  | 2  | 9  | 8  | 1  | 3  | 5  | 4  | 4  | 5  | 4  | 4  | 4  | 4  | 9  | 4  | 11 | 8  | 4  | 6  | 8  | 7  |   |
| ENSP00000218068,ENSP000003 | ENSG00000101951 | PAGE4    | 12  | 6  | 1  | 5  | 0  | 0  | 0  | 0  | 0  | 0  | 0  | 0  | 0  | 0  | 0  | 0  | 0  | 0  | 0  | 0  | 0  | 0  | 0  | 0  | 0  | 0  | 0  | 0  | 0  | 0  | 0  |   |
| ENSP00000218104            | ENSG00000101986 | ABCD1    | 49  | 1  | 0  | 0  | 4  | 7  | 5  | 4  | 3  | 0  | 3  | 5  | 3  | 1  | 0  | 0  | 0  | 3  | 0  | 0  | 1  | 0  | 0  | 0  | 0  | 0  | 1  | 1  | 3  | 1  | 3  |   |
| ENSP00000218340            | ENSG00000102211 | RP2      | 22  | 0  | 1  | 2  | 1  | 2  | 2  | 0  | 0  | 0  | 0  | 0  | 0  | 0  | 1  | 0  | 0  | 0  | 1  | 0  | 0  | 1  | 0  | 2  | 0  | 2  | 0  | 0  | 0  | 3  | 0  | 0 |
| ENSP00000218348            | ENSG00000102226 | USP11    | 88  | 7  | 2  | 5  | 5  | 1  | 2  | 3  | 1  | 0  | 1  | 7  | 2  | 3  | 0  | 0  | 8  | 12 | 8  | 5  | 3  | 1  | 2  | 4  | 1  | 1  | 1  | 0  | 1  | 1  | 1  |   |
| ENSP00000218364            | ENSG00000102241 | HTATSF1  | 187 | 6  | 3  | 5  | 4  | 5  | 4  | 6  | 14 | 8  | 4  | 9  | 8  | 3  | 3  | 5  | 3  | 6  | 5  | 8  | 7  | 4  | 13 | 13 | 6  | 5  | 13 | 5  | 4  | 6  | 2  |   |
| ENSP00000218388,ENSP000003 | ENSG00000102265 | TIMP1    | 24  | 0  | 0  | 0  | 3  | 1  | 2  | 2  | 3  | 1  | 0  | 0  | 0  | 1  | 0  | 0  | 2  | 1  | 0  | 0  | 0  | 0  | 1  | 1  | 0  | 0  | 0  | 0  | 3  | 1  | 2  |   |
| ENSP00000218432,ENSP000003 | ENSG00000102309 | PIN4     | 30  | 2  | 2  | 1  | 2  | 1  | 1  | 1  | 0  | 2  | 0  | 1  | 1  | 1  | 0  | 1  | 0  | 1  | 1  | 2  | 0  | 1  | 0  | 1  | 0  | 2  | 3  | 1  | 0  | 1  | 1  |   |
| ENSP00000218516            | ENSG00000102393 | GLA      | 74  | 3  | 1  | 3  | 5  | 5  | 3  | 3  | 2  | 2  | 1  | 7  | 2  | 3  | 4  | 2  | 2  | 1  | 0  | 3  | 4  | 4  | 2  | 1  | 1  | 2  | 3  | 1  | 3  | 0  | 1  |   |
| ENSP00000218789,ENSP000003 | ENSG00000102606 | ARHGEF7  | 45  | 4  | 1  | 0  | 1  | 3  | 3  | 1  | 0  | 1  | 0  | 0  | 0  | 1  | 1  | 1  | 1  | 1  | 2  | 0  | 1  | 1  | 0  | 3  | 1  | 1  | 2  | 3  | 3  | 6  | 3  |   |
| ENSP00000219084            | ENSG00000102720 | CHD9     | 25  | 1  | 0  | 2  | 3  | 0  | 0  | 0  | 1  | 1  | 1  | 1  | 0  | 0  | 1  | 1  | 1  | 0  | 0  | 1  | 3  | 1  | 1  | 0  | 0  | 3  | 0  | 0  | 1  | 0  | 1  |   |
| ENSP00000219150            | ENSG00000102879 | CORO1A   | 61  | 3  | 0  | 1  | 2  | 0  | 0  | 0  | 0  | 0  | 0  | 0  | 2  | 2  | 3  | 5  | 0  | 0  | 0  | 4  | 14 | 8  | 0  | 2  | 0  | 1  | 5  | 3  | 3  | 1  | 2  |   |
| ENSP00000219169            | ENSG00000102898 | NUTF2    | 102 | 9  | 3  | 0  | 2  | 3  | 3  | 0  | 0  | 5  | 0  | 1  | 0  | 4  | 2  | 1  | 5  | 3  | 3  | 2  | 4  | 5  | 1  | 6  | 5  | 9  | 6  | 4  | 8  | 4  | 8  |   |
| ENSP00000219204            | ENSG00000102931 | ARL2BP   | 15  | 2  | 1  | 0  | 1  | 0  | 0  | 1  | 0  | 0  | 0  | 0  | 0  | 0  | 0  | 1  | 1  | 0  | 1  | 1  | 0  | 1  | 0  | 0  | 0  | 0  | 1  | 0  | 0  | 2  | 2  |   |
| ENSP00000219240            | ENSG00000102967 | DHODH    | 146 | 9  | 5  | 6  | 5  | 4  | 5  | 6  | 6  | 4  | 4  | 4  | 3  | 2  | 0  | 4  | 6  | 7  | 7  | 5  | 2  | 2  | 7  | 3  | 5  | 7  | 4  | 4  | 7  | 9  | 4  |   |
| ENSP00000219252            | ENSG00000102978 | POLR2C   | 108 | 3  | 5  | 0  | 1  | 3  | 2  | 3  | 4  | 3  | 0  | 7  | 3  | 2  | 0  | 5  | 3  | 6  | 3  | 4  | 7  | 5  | 1  | 7  | 2  | 5  | 4  | 3  | 6  | 8  | 3  |   |
| ENSP00000219302            | ENSG00000103024 | NME3     | 17  | 0  | 0  | 0  | 0  | 0  | 1  | 2  | 1  | 0  | 0  | 0  | 0  | 0  | 0  | 0  | 1  | 1  | 1  | 1  | 1  | 0  | 0  | 0  | 0  | 0  | 1  | 3  | 1  | 0  | 1  |   |
| ENSP00000219313            | ENSG00000103035 | PSMD7    | 101 | 3  | 3  | 4  | 2  | 2  | 3  | 4  | 0  | 2  | 0  | 4  | 3  | 4  | 3  | 4  | 4  | 5  | 3  | 4  | 4  | 4  | 3  | 2  | 4  | 4  | 5  | 3  | 3  | 8  | 4  |   |
| ENSP00000219345            | ENSG00000103066 | PLA2G15  | 12  | 1  | 1  | 4  | 1  | 1  | 0  | 1  | 0  | 0  | 0  | 0  | 0  | 1  | 0  | 1  | 0  | 0  | 0  | 0  | 1  | 0  | 0  | 0  | 0  | 0  | 0  | 0  | 0  | 0  | 0  |   |
| ENSP00000219368            | ENSG00000103089 | FA2H     | 10  | 0  | 0  | 0  | 1  | 1  | 0  | 2  | 1  | 1  | 0  | 0  | 0  | 0  | 0  | 0  | 0  | 0  | 0  | 1  | 0  | 0  | 1  | 0  | 0  | 1  | 1  | 0  | 0  | 0  | 0  |   |
| ENSP00000219400            | ENSG00000103121 | C16orf61 | 59  | 3  | 2  | 1  | 1  | 3  | 1  | 1  | 1  | 1  | 4  | 2  | 1  | 1  | 2  | 1  | 1  | 4  | 1  | 2  | 2  | 1  | 3  | 3  | 2  | 2  | 5  | 2  | 2  | 2  | 2  |   |
| ENSP00000219439            | ENSG00000103160 | HSDL1    | 21  | 1  | 1  | 0  | 2  | 2  | 1  | 1  | 0  | 0  | 0  | 1  | 1  | 0  | 0  | 0  | 1  | 2  | 1  | 1  | 1  | 1  | 0  | 1  | 0  | 0  | 0  | 0  | 1  | 1  | 1  |   |
| ENSP00000219473            | ENSG00000103194 | USP10    | 160 | 10 | 6  | 5  | 4  | 5  | 6  | 5  | 4  | 5  | 3  | 5  | 4  | 6  | 5  | 6  | 5  | 6  | 7  | 5  | 5  | 4  | 4  | 6  | 5  | 4  | 8  | 6  | 5  | 5  | 6  |   |
| ENSP00000219548            | ENSG00000103266 | STUB1    | 126 | 3  | 2  | 3  | 2  | 1  | 0  | 4  | 2  | 3  | 4  | 0  | 0  | 1  | 7  | 7  | 5  | 4  | 4  | 6  | 7  | 7  | 6  | 5  | 4  | 0  | 9  | 8  | 4  | 7  | 4  | 7 |
| ENSP00000219627            | ENSG00000103421 | GSPT1    | 51  | 3  | 2  | 1  | 2  | 0  | 2  | 1  | 0  | 2  | 0  | 2  | 0  | 0  | 0  | 1  | 2  | 3  | 2  | 1  | 2  | 3  | 2  | 1  | 1  | 1  | 3  | 2  | 0  | 3  | 5  | 4 |
| ENSP00000219700,ENSP000003 | ENSG00000103415 | HMOX2    | 73  | 1  | 1  | 2  | 1  | 2  | 1  | 2  | 2  | 2  | 4  | 4  | 2  | 2  | 4  | 8  | 0  | 1  | 1  | 1  | 1  | 3  | 5  | 1  | 1  | 7  | 3  | 3  | 3  | 4  | 1  |   |
| ENSP00000219789            | ENSG00000103502 | CDIPT    | 46  | 2  | 0  | 1  | 3  | 1  | 4  | 2  | 0  | 2  | 0  | 0  | 2  | 1  | 0  | 2  | 2  | 1  | 2  | 4  | 2  | 1  | 2  | 2  | 2  | 1  | 0  | 3  | 2  | 1  | 1  |   |
| ENSP00000219797            | ENSG00000103510 | MYST1    | 13  | 1  | 0  | 0  | 0  | 0  | 1  | 2  | 2  | 0  | 0  | 0  | 0  | 0  | 0  | 0  | 0  | 1  | 0  | 1  | 2  | 0  | 0  | 0  | 1  | 1  | 0  | 0  | 0  | 0  | 0  |   |
| ENSP00000219837            | ENSG00000103550 | C16orf88 | 31  | 0  | 2  | 2  |    |    |    |    |    |    |    |    |    |    |    |    |    |    |    |    |    |    |    |    |    |    |    |    |    |    |    |   |

|                                                 |                                 |          |     |    |    |    |    |    |    |    |    |    |    |     |    |    |    |    |    |    |    |    |    |    |    |    |    |    |    |    |    |    |    |    |
|-------------------------------------------------|---------------------------------|----------|-----|----|----|----|----|----|----|----|----|----|----|-----|----|----|----|----|----|----|----|----|----|----|----|----|----|----|----|----|----|----|----|----|
| ENSP00000222005                                 | ENSG00000105401                 | CDC37    | 386 | 13 | 10 | 11 | 5  | 13 | 5  | 6  | 8  | 8  | 5  | 13  | 3  | 11 | 12 | 11 | 17 | 25 | 11 | 9  | 25 | 15 | 10 | 18 | 8  | 16 | 23 | 8  | 19 | 29 | 19 |    |
| ENSP00000222008                                 | ENSG00000105404                 | RABAC1   | 28  | 2  | 1  | 2  | 2  | 2  | 1  | 2  | 3  | 1  | 1  | 0   | 1  | 1  | 2  | 1  | 0  | 1  | 0  | 1  | 1  | 0  | 0  | 0  | 0  | 1  | 0  | 1  | 0  | 0  | 1  |    |
| ENSP00000222120                                 | ENSG00000105514                 | RAB3D    | 67  | 3  | 3  | 3  | 2  | 3  | 3  | 4  | 2  | 2  | 0  | 1   | 0  | 0  | 1  | 1  | 1  | 1  | 2  | 1  | 1  | 2  | 3  | 5  | 4  | 2  | 5  | 3  | 3  | 3  | 3  |    |
| ENSP00000222219                                 | ENSG00000105612                 | DNASE2   | 27  | 0  | 0  | 0  | 1  | 1  | 1  | 1  | 1  | 0  | 1  | 1   | 1  | 1  | 0  | 1  | 1  | 2  | 1  | 1  | 1  | 2  | 1  | 1  | 1  | 1  | 2  | 1  | 1  | 1  | 0  |    |
| ENSP00000222247                                 | ENSG00000105640                 | RPL18A   | 151 | 10 | 6  | 1  | 0  | 3  | 8  | 9  | 3  | 2  | 1  | 5   | 3  | 3  | 2  | 8  | 3  | 7  | 7  | 7  | 5  | 8  | 2  | 4  | 4  | 2  | 10 | 9  | 7  | 6  | 6  |    |
| ENSP00000222256                                 | ENSG00000105649                 | RAB3A    | 28  | 1  | 0  | 2  | 1  | 2  | 1  | 1  | 1  | 0  | 0  | 0   | 0  | 0  | 0  | 1  | 1  | 0  | 1  | 1  | 1  | 2  | 1  | 1  | 2  | 2  | 1  | 2  | 1  | 0  | 2  |    |
| ENSP00000222308                                 | ENSG00000105701                 | FKBP8    | 92  | 4  | 2  | 4  | 2  | 3  | 2  | 1  | 0  | 4  | 1  | 5   | 3  | 5  | 3  | 8  | 1  | 2  | 2  | 4  | 4  | 5  | 2  | 5  | 2  | 2  | 3  | 2  | 3  | 5  | 3  |    |
| ENSP00000222330                                 | ENSG00000105723                 | GSK3A    | 37  | 2  | 3  | 2  | 2  | 1  | 0  | 1  | 1  | 2  | 0  | 1   | 1  | 1  | 0  | 0  | 0  | 3  | 1  | 1  | 1  | 2  | 1  | 0  | 0  | 2  | 2  | 1  | 3  | 2  | 1  |    |
| ENSP00000222345                                 | ENSG00000105738                 | SIPA1L3  | 23  | 1  | 2  | 1  | 0  | 0  | 0  | 3  | 1  | 1  | 0  | 1   | 0  | 0  | 1  | 1  | 0  | 0  | 2  | 1  | 1  | 0  | 1  | 1  | 1  | 1  | 1  | 1  | 0  | 0  | 1  |    |
| ENSP00000222374                                 | ENSG00000105767                 | CADM4    | 11  | 0  | 1  | 0  | 0  | 0  | 0  | 0  | 0  | 0  | 0  | 4   | 1  | 0  | 0  | 0  | 0  | 2  | 0  | 0  | 0  | 0  | 0  | 0  | 0  | 0  | 0  | 1  | 0  | 0  | 1  |    |
| ENSP00000222388,ENSP00000222390,ENSP00000222391 | ENSG00000105767,ENSG00000105926 | ABCF2    | 169 | 10 | 4  | 7  | 4  | 5  | 2  | 4  | 4  | 4  | 3  | 5   | 3  | 4  | 9  | 5  | 4  | 6  | 4  | 8  | 9  | 7  | 6  | 9  | 3  | 5  | 4  | 0  | 12 | 11 | 8  |    |
| ENSP00000222511                                 | ENSG00000105793                 | HGF      | 20  | 2  | 1  | 1  | 1  | 3  | 1  | 0  | 0  | 0  | 0  | 0   | 1  | 0  | 1  | 0  | 0  | 0  | 0  | 0  | 0  | 0  | 0  | 1  | 1  | 2  | 1  | 1  | 2  | 0  | 1  |    |
| ENSP00000222547                                 | ENSG00000105829                 | GTBPBP10 | 10  | 0  | 0  | 0  | 0  | 0  | 1  | 1  | 0  | 0  | 0  | 1   | 1  | 0  | 0  | 0  | 2  | 0  | 1  | 0  | 0  | 0  | 0  | 0  | 0  | 0  | 0  | 2  | 0  | 1  | 0  |    |
| ENSP00000222553                                 | ENSG00000105835                 | BET1     | 18  | 0  | 1  | 0  | 0  | 0  | 0  | 0  | 0  | 1  | 0  | 3   | 1  | 0  | 0  | 0  | 0  | 0  | 0  | 0  | 0  | 0  | 1  | 0  | 1  | 0  | 1  | 1  | 1  | 3  | 3  |    |
| ENSP00000222567                                 | ENSG00000105849                 | PBEF1    | 177 | 5  | 7  | 1  | 2  | 3  | 4  | 4  | 2  | 6  | 1  | 15  | 5  | 4  | 3  | 7  | 8  | 8  | 8  | 3  | 5  | 7  | 2  | 3  | 5  | 6  | 12 | 8  | 8  | 16 | 9  |    |
| ENSP00000222644,ENSP00000222645,ENSP00000222646 | ENSG00000105926                 | TPST1    | 33  | 0  | 0  | 0  | 0  | 1  | 1  | 2  | 2  | 1  | 0  | 1   | 2  | 2  | 0  | 2  | 2  | 0  | 2  | 1  | 1  | 1  | 1  | 2  | 3  | 1  | 1  | 1  | 0  | 1  | 1  |    |
| ENSP00000222673                                 | ENSG00000105953                 | MPPE     | 60  | 3  | 1  | 4  | 0  | 0  | 0  | 2  | 3  | 1  | 3  | 4   | 2  | 3  | 2  | 1  | 2  | 4  | 1  | 3  | 3  | 1  | 1  | 0  | 1  | 3  | 0  | 2  | 5  | 3  | 2  |    |
| ENSP00000222700                                 | ENSG00000106077                 | OGDH     | 524 | 21 | 15 | 8  | 14 | 17 | 17 | 12 | 18 | 16 | 9  | 38  | 20 | 12 | 2  | 12 | 12 | 17 | 14 | 12 | 17 | 17 | 18 | 42 | 28 | 20 | 35 | 18 | 10 | 20 | 13 |    |
| ENSP00000222726                                 | ENSG00000106228                 | ABHD11   | 207 | 5  | 1  | 2  | 5  | 3  | 6  | 6  | 3  | 4  | 4  | 9   | 6  | 6  | 3  | 8  | 3  | 3  | 7  | 6  | 13 | 8  | 20 | 14 | 12 | 17 | 12 | 9  | 3  | 6  | 3  |    |
| ENSP00000222756                                 | ENSG00000106244                 | HNRNPAP1 | 442 | 16 | 9  | 7  | 14 | 25 | 15 | 15 | 17 | 7  | 5  | 21  | 10 | 11 | 5  | 8  | 18 | 34 | 10 | 21 | 22 | 14 | 14 | 27 | 9  | 16 | 20 | 18 | 18 | 6  |    |    |
| ENSP00000222790                                 | ENSG00000106266                 | PDAP1    | 209 | 9  | 5  | 6  | 4  | 6  | 7  | 5  | 13 | 5  | 6  | 8   | 7  | 4  | 6  | 4  | 8  | 12 | 5  | 5  | 11 | 5  | 8  | 8  | 5  | 8  | 6  | 5  | 8  | 9  | 11 |    |
| ENSP00000223023                                 | ENSG00000106299                 | SNX8     | 52  | 3  | 1  | 2  | 2  | 2  | 1  | 3  | 3  | 1  | 2  | 2   | 1  | 2  | 1  | 1  | 2  | 2  | 1  | 3  | 2  | 0  | 2  | 1  | 0  | 3  | 2  | 1  | 3  | 2  | 2  |    |
| ENSP00000223029                                 | ENSG00000106305                 | WASL     | 23  | 1  | 2  | 2  | 0  | 0  | 0  | 1  | 0  | 1  | 0  | 0   | 0  | 1  | 0  | 0  | 1  | 1  | 0  | 1  | 1  | 1  | 1  | 1  | 0  | 1  | 1  | 0  | 1  | 3  | 2  |    |
| ENSP00000223073                                 | ENSG00000106344                 | AIMP2    | 11  | 0  | 2  | 0  | 0  | 0  | 0  | 2  | 0  | 0  | 0  | 0   | 0  | 1  | 1  | 0  | 0  | 1  | 0  | 1  | 1  | 0  | 0  | 0  | 0  | 1  | 0  | 1  | 0  | 0  | 0  |    |
| ENSP00000223127                                 | ENSG00000106397                 | RBM28    | 184 | 8  | 6  | 4  | 5  | 4  | 6  | 5  | 3  | 6  | 4  | 7   | 10 | 3  | 3  | 8  | 2  | 9  | 8  | 7  | 5  | 7  | 9  | 10 | 9  | 2  | 2  | 2  | 11 | 9  | 10 |    |
| ENSP00000223136                                 | ENSG00000106431                 | PIOD3    | 214 | 6  | 5  | 5  | 1  | 0  | 0  | 3  | 20 | 12 | 10 | 5   | 11 | 6  | 10 | 3  | 11 | 12 | 8  | 6  | 10 | 8  | 6  | 4  | 8  | 4  | 8  | 9  | 4  | 4  | 5  | 10 |
| ENSP00000223167                                 | ENSG00000106436                 | FIS1     | 29  | 2  | 0  | 0  | 0  | 0  | 1  | 1  | 0  | 2  | 1  | 2   | 1  | 1  | 0  | 1  | 1  | 0  | 1  | 0  | 1  | 1  | 2  | 1  | 1  | 2  | 2  | 1  | 2  | 1  | 1  |    |
| ENSP00000223274                                 | ENSG00000106541                 | MYL10    | 44  | 2  | 2  | 0  | 2  | 1  | 3  | 2  | 1  | 2  | 0  | 0   | 1  | 2  | 3  | 0  | 2  | 2  | 1  | 2  | 4  | 0  | 3  | 0  | 2  | 2  | 0  | 2  | 0  | 1  | 0  |    |
| ENSP00000223321                                 | ENSG00000106588                 | AGR2     | 249 | 12 | 12 | 8  | 1  | 9  | 13 | 8  | 6  | 15 | 0  | 0   | 0  | 7  | 5  | 11 | 0  | 0  | 1  | 1  | 0  | 3  | 10 | 12 | 14 | 32 | 40 | 29 | 0  | 0  | 0  |    |
| ENSP00000223369                                 | ENSG00000106636                 | PSMA2    | 72  | 3  | 3  | 2  | 1  | 2  | 2  | 2  | 2  | 3  | 0  | 9   | 1  | 1  | 1  | 2  | 2  | 2  | 1  | 1  | 2  | 5  | 0  | 1  | 3  | 2  | 5  | 3  | 1  | 7  | 3  |    |
| ENSP00000223500                                 | ENSG00000106665                 | YKT6     | 77  | 5  | 4  | 4  | 2  | 2  | 1  | 4  | 5  | 2  | 0  | 3   | 1  | 1  | 1  | 2  | 2  | 4  | 3  | 3  | 3  | 3  | 0  | 2  | 1  | 4  | 4  | 2  | 5  | 2  | 2  |    |
| ENSP00000223641                                 | ENSG00000106803                 | CHMP5    | 87  | 2  | 3  | 3  | 2  | 2  | 1  | 2  | 3  | 4  | 1  | 2   | 2  | 3  | 3  | 3  | 1  | 5  | 2  | 5  | 4  | 5  | 2  | 3  | 3  | 3  | 5  | 4  | 3  | 3  | 3  |    |
| ENSP00000223864                                 | ENSG00000107020                 | SEC61B   | 67  | 2  | 1  | 2  | 2  | 3  | 2  | 1  | 3  | 3  | 2  | 2   | 1  | 3  | 3  | 2  | 2  | 2  | 3  | 2  | 3  | 2  | 2  | 2  | 1  | 3  | 2  | 2  | 3  | 3  | 3  |    |
| ENSP00000224112,ENSP00000224140                 | ENSG00000107262                 | C9orf46  | 23  | 0  | 1  | 0  | 2  | 2  | 2  | 1  | 0  | 0  | 0  | 0   | 1  | 0  | 0  | 0  | 1  | 0  | 0  | 0  | 0  | 0  | 0  | 1  | 2  | 1  | 2  | 1  | 2  | 0  | 1  |    |
| ENSP00000224237                                 | ENSG00000107290                 | BAG1     | 44  | 0  | 0  | 0  | 3  | 2  | 1  | 1  | 0  | 0  | 0  | 0   | 0  | 3  | 1  | 1  | 0  | 1  | 1  | 2  | 2  | 1  | 2  | 3  | 3  | 3  | 5  | 4  | 1  | 2  | 2  |    |
| ENSP00000224652                                 | ENSG00000107669                 | SETX     | 31  | 1  | 0  | 0  | 2  | 0  | 2  | 4  | 0  | 2  | 2  | 1   | 0  | 0  | 1  | 1  | 2  | 0  | 0  | 1  | 3  | 0  | 0  | 0  | 1  | 0  | 0  | 0  | 0  | 2  | 4  |    |
| ENSP00000225174                                 | ENSG00000108179                 | VIM      | 601 | 39 | 27 | 33 | 3  | 7  | 4  | 11 | 35 | 6  | 94 | 127 | 93 | 0  | 21 | 4  | 0  | 1  | 4  | 3  | 10 | 5  | 24 | 31 | 3  | 3  | 5  | 5  | 1  | 1  | 1  |    |
| ENSP00000225235                                 | ENSG00000108239                 | ATE1     | 52  | 4  | 2  | 2  | 1  | 1  | 2  | 0  | 0  | 0  | 0  | 0   | 0  | 0  | 2  | 0  | 1  | 2  | 3  | 2  | 3  | 2  | 3  | 1  | 1  | 0  | 3  | 5  | 0  | 6  | 1  |    |
| ENSP00000225296                                 | ENSG00000108250                 | PP1F     | 385 | 14 | 13 | 13 | 12 | 16 | 12 | 10 | 8  | 10 | 5  | 14  | 9  | 11 | 8  | 9  | 12 | 17 | 9  | 14 | 10 | 13 | 18 | 21 | 16 | 17 | 13 | 11 | 20 | 19 | 11 |    |
| ENSP00000225298                                 | ENSG00000108260                 | TBC1D12  | 11  | 4  | 0  | 1  | 0  | 0  | 0  | 0  | 0  | 0  | 1  | 0   | 0  | 0  | 1  | 1  | 0  | 0  | 0  | 0  | 1  | 0  | 0  | 2  | 0  | 0  | 0  | 0  | 0  | 0  | 0  |    |
| ENSP00000225388                                 | ENSG00000108266                 | DXH33    | 35  | 0  | 2  | 1  | 1  | 0  | 0  | 3  | 0  | 0  | 2  | 3   | 1  | 2  | 1  | 0  | 2  | 0  | 0  | 2  | 1  | 1  | 1  | 2  | 2  | 0  | 3  | 1  | 2  | 1  | 1  |    |
| ENSP00000225394,ENSP00000225402                 | ENSG00000108266                 | UTP18    | 52  | 3  | 1  | 0  | 0  | 1  | 1  | 0  | 0  | 1  | 0  | 6   | 3  | 2  | 0  | 2  | 4  | 2  | 3  | 1  | 0  | 1  | 1  | 3  | 2  | 1  | 3  | 1  | 1  | 5  | 4  |    |
| ENSP00000225402                                 | ENSG00000108270                 | NUFIP2   | 116 | 6  | 5  | 6  | 4  | 5  | 1  | 3  | 1  | 2  | 1  | 4   | 1  | 5  | 7  | 4  | 0  | 7  | 5  | 6  | 10 | 5  | 2  | 1  | 0  | 2  | 5  | 5  | 6  | 4  | 3  |    |
| ENSP00000225426                                 | ENSG00000108294                 | GIT1     | 65  | 2  | 1  | 1  | 4  | 1  | 2  | 2  | 1  | 2  | 0  | 1   | 1  | 2  | 2  | 1  | 2  | 5  | 4  | 5  | 4  | 1  | 1  | 1  | 1  | 1  | 5  | 3  | 4  | 2  | 3  |    |
| ENSP00000225428                                 | ENSG00000108296                 | AATF     | 87  | 5  | 2  | 3  | 0  | 0  | 1  | 3  | 0  | 3  | 2  | 6   | 4  | 2  | 3  | 2  | 3  | 2  | 4  | 1  | 2  | 3  | 5  | 6  | 3  | 4  | 2  | 4  | 2  | 8  | 2  |    |
| ENSP00000225430                                 | ENSG00000108298                 | PSMB3    | 96  | 2  | 5  | 2  | 1  | 3  | 3  | 2  | 2  | 3  | 0  | 7   | 3  | 3  | 2  | 3  | 3  | 5  | 4  | 2  | 2  | 3  | 2  | 2  | 4  | 5  | 4  | 5  | 5  | 4  | 4  |    |
| ENSP00000225525                                 | ENSG00000108417                 | CWC25    | 22  | 2  | 0  | 0  | 2  | 1  | 1  | 2  | 0  | 1  | 0  | 1   | 0  | 1  | 1  | 1  | 0  | 2  | 0  | 0  | 0  | 0  | 1  | 0  | 1  | 0  | 0  | 1  | 3  | 0  | 1  |    |
| ENSP00000225550                                 | ENSG00000108439                 | RPL19    | 321 | 14 | 7  | 9  | 9  | 14 | 8  | 10 | 15 | 8  | 3  | 13  | 6  | 5  | 15 | 10 | 13 | 13 | 13 | 11 | 12 | 10 | 7  | 18 | 9  | 19 | 12 | 10 | 13 | 7  | 8  |    |
| ENSP00000225603,ENSP00000225614                 | ENSG00000108479                 | TAX1BP3  | 37  | 1  | 1  | 2  | 1  | 1  | 1  | 2  | 1  | 1  | 1  | 0   | 0  | 2  | 2  | 0  | 1  | 1  | 1  | 2  | 2  | 2  | 1  | 2  | 0  | 2  | 2  | 1  | 2  | 1  | 1  |    |
| ENSP00000225655                                 | ENSG00000108518                 | KRT37    | 39  | 2  | 2  | 0  | 0  | 1  | 1  | 1  | 1  | 2  | 0  | 3   | 4  | 1  | 0  | 2  | 0  | 0  | 1  | 1  | 1  | 1  | 2  | 6  | 3  | 2  | 2  | 0  | 0  | 0  | 0  |    |
| ENSP00000225665                                 | ENSG00000108528                 | PNPO     | 77  | 4  | 2  | 2  | 4  | 3  | 3  | 4  | 2  | 1  | 0  | 1   | 0  | 3  | 0  | 2  | 3  | 4  | 3  | 3  | 3  | 2  | 0  | 0  | 1  | 7  | 7  | 3  | 2  | 5  | 3  |    |
| ENSP00000225666                                 | ENSG00000108528                 | CBX1     | 431 | 33 | 10 | 21 | 6  |    |    |    |    |    |    |     |    |    |    |    |    |    |    |    |    |    |    |    |    |    |    |    |    |    |    |    |

|                                 |                 |          |      |    |    |    |    |    |    |    |    |    |    |    |    |    |    |    |    |    |    |    |    |    |    |    |    |    |    |    |    |    |    |   |
|---------------------------------|-----------------|----------|------|----|----|----|----|----|----|----|----|----|----|----|----|----|----|----|----|----|----|----|----|----|----|----|----|----|----|----|----|----|----|---|
| ENSP00000228740                 | ENSG00000111144 | LTA4H    | 302  | 12 | 9  | 7  | 9  | 4  | 8  | 8  | 3  | 6  | 2  | 17 | 5  | 9  | 2  | 6  | 14 | 19 | 14 | 13 | 9  | 9  | 5  | 15 | 10 | 16 | 16 | 9  | 11 | 22 | 13 |   |
| ENSP00000228827                 | ENSG00000111231 | GNPN3    | 16   | 1  | 0  | 0  | 1  | 0  | 0  | 0  | 0  | 0  | 0  | 0  | 0  | 1  | 0  | 2  | 1  | 0  | 2  | 2  | 0  | 2  | 0  | 0  | 0  | 0  | 0  | 0  | 1  | 2  | 1  |   |
| ENSP00000228872                 | ENSG00000111276 | CDKN1B   | 10   | 0  | 1  | 0  | 0  | 0  | 1  | 2  | 0  | 0  | 0  | 0  | 0  | 0  | 1  | 0  | 0  | 0  | 1  | 1  | 0  | 0  | 0  | 1  | 0  | 0  | 1  | 0  | 0  | 0  | 0  |   |
| ENSP00000228928                 | ENSG00000111331 | OAS3     | 45   | 0  | 0  | 0  | 3  | 1  | 1  | 10 | 5  | 4  | 0  | 0  | 0  | 1  | 0  | 1  | 0  | 2  | 1  | 2  | 3  | 2  | 0  | 3  | 0  | 2  | 3  | 1  | 0  | 0  | 0  |   |
| ENSP00000228945                 | ENSG00000111348 | ARHGDB1B | 17   | 0  | 1  | 0  | 0  | 0  | 0  | 2  | 3  | 3  | 0  | 0  | 0  | 0  | 0  | 0  | 0  | 0  | 0  | 0  | 0  | 0  | 0  | 0  | 0  | 3  | 3  | 2  | 0  | 0  | 0  |   |
| ENSP00000228958                 | ENSG00000111361 | EIF2B1   | 95   | 3  | 5  | 0  | 8  | 3  | 5  | 5  | 0  | 3  | 0  | 3  | 1  | 6  | 0  | 4  | 4  | 4  | 4  | 5  | 2  | 6  | 0  | 3  | 2  | 1  | 4  | 2  | 1  | 6  | 5  |   |
| ENSP00000229043                 | ENSG00000111445 | RFC5     | 76   | 2  | 3  | 0  | 5  | 1  | 2  | 3  | 0  | 3  | 0  | 5  | 3  | 3  | 0  | 4  | 4  | 1  | 6  | 6  | 0  | 4  | 0  | 1  | 3  | 1  | 4  | 2  | 3  | 2  | 5  |   |
| ENSP00000229179                 | ENSG00000111581 | NUP107   | 258  | 8  | 9  | 6  | 9  | 6  | 6  | 9  | 3  | 5  | 5  | 15 | 12 | 9  | 5  | 9  | 9  | 8  | 10 | 9  | 8  | 8  | 6  | 16 | 14 | 8  | 13 | 5  | 7  | 8  | 13 |   |
| ENSP00000229201                 | ENSG00000111602 | TIMELESS | 38   | 2  | 0  | 1  | 3  | 0  | 0  | 1  | 0  | 0  | 1  | 1  | 1  | 2  | 2  | 2  | 1  | 0  | 3  | 2  | 3  | 1  | 2  | 4  | 2  | 0  | 0  | 0  | 1  | 1  | 2  |   |
| ENSP00000229214                 | ENSG00000111615 | KRR1     | 104  | 1  | 0  | 3  | 2  | 0  | 1  | 0  | 1  | 4  | 1  | 8  | 4  | 5  | 5  | 4  | 5  | 4  | 3  | 2  | 2  | 5  | 3  | 3  | 2  | 2  | 4  | 8  | 6  | 6  | 6  |   |
| ENSP00000229239,ENSP00000111640 | ENSG00000111640 | GAPDH    | 1000 | 30 | 42 | 25 | 13 | 42 | 44 | 23 | 16 | 38 | 9  | 47 | 18 | 27 | 19 | 35 | 33 | 34 | 39 | 22 | 45 | 44 | 12 | 29 | 53 | 57 | 63 | 27 | 49 | 36 | 3  |   |
| ENSP00000229251                 | ENSG00000111652 | COP3A    | 62   | 4  | 2  | 1  | 3  | 3  | 1  | 2  | 3  | 2  | 2  | 1  | 2  | 1  | 2  | 2  | 2  | 2  | 3  | 0  | 2  | 2  | 2  | 2  | 1  | 2  | 2  | 2  | 3  | 3  | 2  | 2 |
| ENSP00000229268,ENSP00000111667 | ENSG00000111667 | USP5     | 502  | 27 | 23 | 26 | 15 | 14 | 19 | 17 | 17 | 14 | 10 | 19 | 9  | 14 | 16 | 10 | 13 | 21 | 16 | 20 | 20 | 10 | 16 | 16 | 10 | 23 | 23 | 15 | 16 | 18 | 15 |   |
| ENSP00000229270,ENSP00000111669 | ENSG00000111669 | TPH1     | 617  | 27 | 25 | 12 | 3  | 17 | 24 | 13 | 15 | 23 | 6  | 27 | 16 | 14 | 7  | 17 | 20 | 13 | 22 | 9  | 37 | 33 | 10 | 22 | 19 | 26 | 40 | 32 | 26 | 41 | 21 |   |
| ENSP00000229277                 | ENSG00000111674 | ENO2     | 351  | 8  | 8  | 4  | 9  | 4  | 15 | 5  | 4  | 10 | 6  | 19 | 5  | 9  | 3  | 9  | 17 | 7  | 19 | 14 | 18 | 16 | 5  | 10 | 8  | 12 | 22 | 13 | 15 | 35 | 22 |   |
| ENSP00000229281                 | ENSG00000111678 | C12orf57 | 47   | 0  | 0  | 2  | 2  | 1  | 2  | 1  | 0  | 0  | 1  | 0  | 0  | 2  | 3  | 1  | 2  | 3  | 2  | 2  | 3  | 1  | 2  | 2  | 3  | 2  | 2  | 2  | 2  | 2  | 2  |   |
| ENSP00000229328                 | ENSG00000111725 | PRKAB1   | 10   | 0  | 1  | 0  | 2  | 1  | 2  | 0  | 0  | 2  | 0  | 0  | 0  | 1  | 0  | 0  | 0  | 0  |    |    |    |    |    |    |    |    |    |    |    |    |    |   |

|                                                 |                 |           |     |    |    |    |    |    |    |    |    |    |   |    |    |    |    |    |    |    |    |    |    |    |    |    |    |    |    |    |    |    |    |    |
|-------------------------------------------------|-----------------|-----------|-----|----|----|----|----|----|----|----|----|----|---|----|----|----|----|----|----|----|----|----|----|----|----|----|----|----|----|----|----|----|----|----|
| ENSP00000237455                                 | ENSG00000115561 | VPS24     | 15  | 0  | 0  | 0  | 0  | 0  | 0  | 1  | 2  | 0  | 0 | 2  | 0  | 0  | 0  | 0  | 0  | 1  | 1  | 1  | 0  | 0  | 0  | 0  | 1  | 3  | 0  | 2  | 0  | 0  | 1  |    |
| ENSP00000237500,ENSP00000237530,ENSP00000237530 | ENSG00000118680 | MYL12B    | 718 | 33 | 27 | 24 | 23 | 42 | 24 | 33 | 21 | 37 | 7 | 17 | 20 | 23 | 16 | 20 | 21 | 30 | 25 | 23 | 29 | 13 | 23 | 24 | 32 | 25 | 19 | 21 | 25 | 18 |    |    |
| ENSP00000237642                                 | ENSG00000118705 | RPN2      | 383 | 25 | 27 | 5  | 7  | 8  | 18 | 7  | 8  | 20 | 0 | 24 | 16 | 15 | 1  | 14 | 13 | 5  | 9  | 8  | 6  | 20 | 2  | 25 | 17 | 11 | 24 | 18 | 3  | 12 | 15 |    |
| ENSP00000237689                                 | ENSG00000118804 | STBD1     | 10  | 0  | 0  | 0  | 1  | 0  | 0  | 1  | 0  | 0  | 0 | 0  | 0  | 0  | 1  | 1  | 0  | 0  | 0  | 1  | 0  | 1  | 0  | 2  | 1  | 0  | 0  | 1  | 0  | 0  | 0  |    |
| ENSP00000238112                                 | ENSG00000119013 | NDUFB3    | 76  | 1  | 1  | 1  | 2  | 2  | 2  | 1  | 2  | 1  | 3 | 2  | 1  | 3  | 3  | 4  | 4  | 2  | 2  | 1  | 2  | 6  | 5  | 2  | 5  | 4  | 4  | 2  | 4  | 2  |    |    |
| ENSP00000238146                                 | ENSG00000119203 | CPSF3     | 69  | 4  | 1  | 4  | 3  | 1  | 3  | 3  | 0  | 2  | 1 | 7  | 2  | 1  | 1  | 2  | 3  | 1  | 4  | 1  | 2  | 1  | 1  | 4  | 1  | 1  | 5  | 2  | 2  | 5  | 1  |    |
| ENSP00000238256                                 | ENSG00000119321 | DDX55     | 48  | 3  | 2  | 1  | 4  | 0  | 2  | 2  | 1  | 1  | 0 | 2  | 0  | 2  | 1  | 2  | 5  | 1  | 2  | 1  | 2  | 1  | 1  | 3  | 0  | 1  | 0  | 0  | 3  | 3  | 2  |    |
| ENSP00000238477                                 | ENSG00000119523 | FKBP15    | 91  | 3  | 0  | 1  | 5  | 4  | 4  | 3  | 3  | 1  | 1 | 1  | 2  | 3  | 0  | 3  | 1  | 3  | 0  | 8  | 4  | 1  | 4  | 3  | 2  | 2  | 2  | 3  | 8  | 7  | 9  |    |
| ENSP00000238497                                 | ENSG00000119541 | ALG2      | 33  | 1  | 0  | 0  | 3  | 1  | 3  | 2  | 0  | 1  | 0 | 2  | 1  | 1  | 0  | 0  | 1  | 1  | 2  | 1  | 0  | 1  | 1  | 3  | 1  | 2  | 3  | 2  | 0  | 0  | 0  |    |
| ENSP00000238522                                 | ENSG00000119541 | VPS4B     | 94  | 2  | 2  | 1  | 2  | 4  | 2  | 5  | 2  | 3  | 0 | 0  | 1  | 4  | 3  | 2  | 3  | 5  | 4  | 4  | 4  | 1  | 2  | 3  | 2  | 7  | 7  | 6  | 3  | 4  | 6  |    |
| ENSP00000238616                                 | ENSG00000119638 | CMYA5     | 17  | 0  | 0  | 0  | 0  | 0  | 0  | 1  | 2  | 1  | 0 | 2  | 0  | 0  | 0  | 1  | 0  | 1  | 1  | 1  | 0  | 0  | 0  | 1  | 1  | 3  | 0  | 1  | 0  | 0  | 1  |    |
| ENSP00000238633                                 | ENSG00000119655 | NEK9      | 28  | 0  | 1  | 0  | 1  | 1  | 0  | 0  | 1  | 0  | 0 | 1  | 1  | 2  | 2  | 1  | 0  | 0  | 1  | 2  | 3  | 1  | 0  | 2  | 0  | 3  | 1  | 0  | 1  | 1  | 2  |    |
| ENSP00000238647                                 | ENSG00000119669 | NPC2      | 61  | 1  | 1  | 2  | 3  | 1  | 2  | 1  | 3  | 1  | 2 | 7  | 2  | 2  | 1  | 1  | 3  | 2  | 4  | 3  | 2  | 2  | 1  | 2  | 1  | 2  | 2  | 2  | 2  | 2  | 1  |    |
| ENSP00000238688                                 | ENSG00000119705 | C14orf156 | 92  | 4  | 1  | 3  | 5  | 1  | 3  | 3  | 0  | 1  | 3 | 3  | 4  | 3  | 3  | 3  | 6  | 8  | 5  | 6  | 5  | 0  | 3  | 5  | 2  | 1  | 6  | 1  | 3  | 0  | 1  |    |
| ENSP00000238714                                 | ENSG00000115421 | PAPOLG    | 102 | 4  | 2  | 3  | 3  | 4  | 2  | 3  | 2  | 1  | 5 | 6  | 0  | 3  | 5  | 2  | 1  | 4  | 5  | 2  | 7  | 4  | 5  | 5  | 4  | 4  | 2  | 1  | 6  | 5  | 2  |    |
| ENSP00000238738                                 | ENSG00000119729 | RHOQ      | 52  | 2  | 1  | 2  | 2  | 3  | 2  | 2  | 2  | 1  | 1 | 2  | 2  | 2  | 2  | 0  | 2  | 4  | 2  | 0  | 2  | 1  | 1  | 2  | 1  | 2  | 1  | 0  | 3  | 2  | 3  |    |
| ENSP00000238788,ENSP00000238855,ENSP00000239138 | ENSG00000119777 | TMEM214   | 17  | 1  | 0  | 2  | 0  | 0  | 0  | 1  | 1  | 0  | 0 | 0  | 0  | 0  | 0  | 1  | 0  | 0  | 2  | 1  | 0  | 1  | 0  | 1  | 0  | 1  | 1  | 1  | 1  | 1  | 1  |    |
| ENSP00000239690                                 | ENSG00000120526 | AFTPH     | 96  | 8  | 4  | 3  | 5  | 3  | 4  | 4  | 1  | 3  | 1 | 2  | 3  | 3  | 2  | 3  | 2  | 5  | 3  | 5  | 3  | 2  | 3  | 4  | 4  | 4  | 5  | 1  | 3  | 1  | 2  |    |
| ENSP00000239882,ENSP00000239891                 | ENSG00000120690 | GNA13     | 11  | 1  | 0  | 1  | 1  | 0  | 1  | 1  | 1  | 2  | 0 | 0  | 0  | 0  | 0  | 0  | 0  | 0  | 0  | 0  | 0  | 1  | 0  | 1  | 0  | 0  | 1  | 0  | 0  | 0  | 0  |    |
| ENSP00000239940                                 | ENSG00000120697 | NUDCD1    | 85  | 3  | 3  | 1  | 1  | 2  | 3  | 2  | 1  | 1  | 2 | 5  | 2  | 2  | 1  | 5  | 4  | 3  | 3  | 4  | 7  | 3  | 1  | 3  | 2  | 3  | 5  | 3  | 4  | 3  | 3  |    |
| ENSP00000240055                                 | ENSG00000120837 | ELF1      | 119 | 5  | 3  | 0  | 0  | 3  | 2  | 3  | 5  | 4  | 3 | 0  | 4  | 2  | 3  | 0  | 4  | 2  | 11 | 3  | 3  | 6  | 2  | 0  | 4  | 3  | 5  | 4  | 3  | 11 | 11 | 10 |
| ENSP00000240079                                 | ENSG00000120860 | ALG5      | 29  | 0  | 1  | 0  | 3  | 1  | 3  | 1  | 0  | 1  | 0 | 0  | 1  | 0  | 1  | 3  | 1  | 0  | 1  | 2  | 1  | 3  | 1  | 0  | 2  | 1  | 1  | 1  | 1  | 1  | 1  |    |
| ENSP00000240100                                 | ENSG00000120875 | PFN2      | 125 | 8  | 5  | 4  | 12 | 15 | 8  | 8  | 1  | 5  | 1 | 2  | 3  | 4  | 2  | 4  | 2  | 1  | 3  | 7  | 3  | 3  | 1  | 5  | 6  | 4  | 2  | 3  | 1  | 0  | 2  |    |
| ENSP00000240123                                 | ENSG00000120910 | NFYB      | 19  | 1  | 0  | 0  | 0  | 0  | 0  | 0  | 0  | 1  | 0 | 1  | 4  | 1  | 0  | 0  | 1  | 0  | 1  | 1  | 0  | 2  | 1  | 0  | 1  | 0  | 2  | 1  | 0  | 1  | 1  |    |
| ENSP00000240139,ENSP00000240185                 | ENSG00000120910 | CCDC53    | 45  | 1  | 1  | 2  | 1  | 2  | 1  | 2  | 2  | 0  | 1 | 1  | 0  | 1  | 2  | 1  | 3  | 1  | 2  | 1  | 3  | 1  | 0  | 3  | 2  | 2  | 1  | 2  | 1  | 2  | 1  |    |
| ENSP00000240285                                 | ENSG00000121039 | DUSP4     | 25  | 2  | 1  | 2  | 1  | 2  | 0  | 1  | 2  | 1  | 0 | 0  | 0  | 1  | 0  | 1  | 0  | 1  | 0  | 0  | 1  | 1  | 1  | 1  | 1  | 1  | 2  | 0  | 1  | 1  | 0  |    |
| ENSP00000240304,ENSP00000240316                 | ENSG00000121088 | SORBS3    | 13  | 0  | 0  | 0  | 1  | 2  | 1  | 1  | 0  | 0  | 1 | 0  | 0  | 0  | 1  | 0  | 0  | 2  | 0  | 1  | 1  | 0  | 0  | 1  | 0  | 0  | 1  | 0  | 0  | 0  | 0  |    |
| ENSP00000240349                                 | ENSG00000121152 | PPP3CC    | 12  | 0  | 1  | 1  | 0  | 0  | 0  | 0  | 0  | 0  | 0 | 0  | 0  | 0  | 0  | 1  | 0  | 0  | 2  | 1  | 1  | 1  | 0  | 0  | 1  | 0  | 2  | 0  | 0  | 0  | 1  |    |
| ENSP00000240423                                 | ENSG00000121316 | TARDBP    | 47  | 2  | 1  | 1  | 2  | 3  | 3  | 3  | 0  | 1  | 0 | 2  | 2  | 2  | 0  | 2  | 2  | 0  | 3  | 1  | 2  | 1  | 0  | 1  | 3  | 3  | 0  | 3  | 1  | 3  | 0  |    |
| ENSP00000240617                                 | ENSG00000121354 | RDH10     | 187 | 9  | 6  | 6  | 6  | 6  | 5  | 8  | 3  | 6  | 0 | 3  | 7  | 2  | 8  | 9  | 1  | 7  | 6  | 4  | 10 | 9  | 12 | 15 | 8  | 3  | 11 | 2  | 5  | 3  | 7  |    |
| ENSP00000240851,ENSP00000240922                 | ENSG00000121354 | LUC7L3    | 15  | 0  | 1  | 0  | 1  | 1  | 0  | 1  | 0  | 1  | 0 | 0  | 0  | 2  | 0  | 2  | 0  | 0  | 1  | 0  | 1  | 0  | 0  | 1  | 0  | 0  | 2  | 1  | 0  | 0  | 0  |    |
| ENSP00000241052                                 | ENSG00000121691 | COIL      | 98  | 5  | 6  | 1  | 3  | 0  | 2  | 3  | 2  | 5  | 2 | 5  | 5  | 2  | 1  | 4  | 3  | 3  | 4  | 1  | 2  | 3  | 4  | 4  | 5  | 1  | 4  | 2  | 2  | 6  | 8  |    |
| ENSP00000241436                                 | ENSG00000122008 | NACA3P    | 59  | 5  | 2  | 2  | 2  | 4  | 2  | 0  | 0  | 1  | 2 | 2  | 2  | 0  | 3  | 3  | 3  | 4  | 2  | 1  | 1  | 1  | 5  | 4  | 1  | 2  | 1  | 1  | 1  | 1  | 1  |    |
| ENSP00000241502                                 | ENSG00000122068 | NCAPH     | 34  | 1  | 1  | 0  | 1  | 1  | 0  | 1  | 2  | 0  | 1 | 3  | 0  | 1  | 1  | 0  | 1  | 1  | 0  | 2  | 3  | 0  | 1  | 1  | 0  | 2  | 7  | 0  | 1  | 1  | 1  |    |
| ENSP00000242059,ENSP00000242209                 | ENSG00000122642 | PLBD1     | 131 | 5  | 4  | 9  | 7  | 6  | 3  | 4  | 3  | 2  | 6 | 2  | 2  | 3  | 7  | 2  | 5  | 2  | 2  | 3  | 9  | 2  | 5  | 2  | 2  | 7  | 6  | 5  | 9  | 4  | 3  |    |
| ENSP00000242210                                 | ENSG00000122642 | TFG       | 32  | 0  | 0  | 0  | 0  | 0  | 0  | 0  | 0  | 0  | 0 | 0  | 0  | 0  | 2  | 0  | 0  | 0  | 0  | 3  | 0  | 3  | 7  | 9  | 8  | 0  | 0  | 0  | 0  | 0  | 0  |    |
| ENSP00000242220                                 | ENSG00000122643 | NAT13     | 156 | 10 | 6  | 4  | 3  | 4  | 8  | 5  | 3  | 9  | 1 | 3  | 2  | 8  | 4  | 7  | 7  | 5  | 8  | 5  | 3  | 4  | 3  | 4  | 2  | 5  | 8  | 4  | 5  | 11 | 5  |    |
| ENSP00000242284,ENSP00000242310                 | ENSG00000122705 | CAT       | 74  | 3  | 2  | 1  | 1  | 3  | 3  | 3  | 3  | 2  | 0 | 1  | 1  | 3  | 3  | 4  | 5  | 4  | 2  | 4  | 2  | 2  | 1  | 3  | 1  | 1  | 2  | 2  | 5  | 5  | 2  |    |
| ENSP00000242351                                 | ENSG00000122728 | POLK      | 280 | 8  | 6  | 4  | 8  | 10 | 9  | 12 | 13 | 15 | 2 | 10 | 3  | 9  | 8  | 10 | 7  | 8  | 9  | 11 | 7  | 10 | 8  | 14 | 10 | 14 | 22 | 18 | 2  | 9  | 4  |    |
| ENSP00000242591                                 | ENSG00000122970 | FYTDT1    | 10  | 0  | 2  | 0  | 1  | 0  | 0  | 0  | 2  | 0  | 0 | 0  | 0  | 0  | 0  | 0  | 0  | 0  | 0  | 0  | 0  | 0  | 0  | 1  | 0  | 1  | 0  | 1  | 1  | 0  | 0  |    |
| ENSP00000242592                                 | ENSG00000122971 | SCRN1     | 29  | 0  | 0  | 0  | 1  | 0  | 1  | 2  | 0  | 1  | 0 | 0  | 3  | 2  | 0  | 0  | 0  | 1  | 2  | 0  | 1  | 0  | 0  | 1  | 0  | 2  | 2  | 1  | 1  | 0  | 4  | 3  |
| ENSP00000242630                                 | ENSG00000123009 | FKBP9     | 112 | 11 | 7  | 6  | 1  | 0  | 0  | 3  | 3  | 0  | 1 | 5  | 4  | 3  | 3  | 6  | 5  | 4  | 6  | 6  | 9  | 8  | 1  | 2  | 0  | 4  | 10 | 4  | 0  | 0  | 0  |    |
| ENSP00000242770                                 | ENSG00000123136 | NT5C3     | 88  | 3  | 3  | 2  | 2  | 2  | 2  | 4  | 3  | 6  | 2 | 3  | 2  | 1  | 2  | 4  | 2  | 3  | 5  | 2  | 6  | 5  | 2  | 3  | 3  | 5  | 4  | 2  | 2  | 2  | 0  |    |
| ENSP00000242783,ENSP00000242784                 | ENSG00000123143 | CLTA      | 143 | 3  | 4  | 3  | 5  | 11 | 9  | 7  | 6  | 4  | 1 | 6  | 5  | 3  | 1  | 5  | 4  | 5  | 4  | 6  | 3  | 3  | 3  | 9  | 6  | 4  | 9  | 8  | 2  | 2  | 2  |    |
| ENSP00000242784                                 | ENSG00000123144 | TAF1L     | 158 | 8  | 3  | 6  | 5  | 4  | 6  | 4  | 8  | 6  | 3 | 5  | 5  | 5  | 10 | 5  | 3  | 4  | 5  | 6  | 4  | 6  | 3  | 4  | 3  | 6  | 9  | 5  | 3  | 9  | 5  |    |
| ENSP00000242796                                 | ENSG00000123154 | ZC3HAV1   | 13  | 1  | 0  | 0  | 0  | 1  | 0  | 4  | 0  | 1  | 0 | 1  | 0  | 0  | 0  | 0  | 1  | 2  | 0  | 0  | 1  | 0  | 0  | 0  | 0  | 0  | 0  | 0  | 0  | 0  | 0  | 1  |
| ENSP00000242848,ENSP00000243077                 | ENSG00000123200 | IFT81     | 193 | 7  | 6  | 6  | 4  | 5  | 1  | 7  | 9  | 6  | 5 | 11 | 3  | 5  | 9  | 6  | 5  | 6  | 6  | 5  | 7  | 9  | 6  | 11 | 4  | 6  | 11 | 7  | 6  | 7  | 7  |    |
| ENSP00000243167                                 | ENSG00000123344 | ACADS     | 16  | 0  | 0  | 0  | 2  | 0  | 0  | 0  | 0  | 0  | 0 | 1  | 0  | 0  | 0  | 1  | 1  | 1  | 0  | 0  | 1  | 0  | 0  | 1  | 1  | 0  | 2  | 2  | 1  | 2  | 0  |    |
| ENSP00000243253                                 | ENSG00000123360 | NME2P1    | 142 | 0  | 1  | 0  | 10 | 19 | 11 | 7  | 3  | 2  | 0 | 1  | 1  | 0  | 1  | 0  | 5  | 4  | 3  | 5  | 1  | 0  | 8  | 10 | 8  | 7  | 9  | 5  | 5  | 11 | 5  |    |
| ENSP00000243298                                 | ENSG00000123570 | STX10     | 297 | 17 | 11 | 10 | 4  | 12 | 12 | 11 | 6  | 8  | 3 | 12 | 6  | 11 | 8  | 8  | 10 | 16 | 14 | 12 | 13 | 6  | 3  | 8  | 3  | 8  | 13 | 16 | 10 | 13 | 13 |    |
| ENSP00000243325                                 | ENSG00000123595 | DDX39     | 52  | 1  | 0  | 2  | 2  | 0  | 1  | 1  | 1  | 0  | 0 | 1  | 4  | 2  | 2  | 3  | 4  | 4  | 2  | 3  | 6  | 2  | 1  | 1  | 0  | 4  | 1  | 0  | 2  | 0  | 2  |    |
| ENSP00000243346                                 | ENSG00000123609 | PKN1      | 755 | 22 | 18 | 16 |    |    |    |    |    |    |   |    |    |    |    |    |    |    |    |    |    |    |    |    |    |    |    |    |    |    |    |    |

|                                 |                  |           |      |    |    |    |    |    |    |    |    |    |    |    |    |    |    |    |    |    |    |    |    |    |    |    |    |    |    |    |    |    |    |   |
|---------------------------------|------------------|-----------|------|----|----|----|----|----|----|----|----|----|----|----|----|----|----|----|----|----|----|----|----|----|----|----|----|----|----|----|----|----|----|---|
| ENSP00000246117                 | ENSG00000125912  | NCLN      | 123  | 7  | 2  | 1  | 1  | 2  | 4  | 3  | 2  | 6  | 0  | 5  | 2  | 3  | 0  | 4  | 6  | 10 | 8  | 4  | 4  | 4  | 2  | 9  | 3  | 5  | 8  | 5  | 4  | 6  | 3  |   |
| ENSP00000246151                 | ENSG00000057577  | C1orf128  | 42   | 2  | 1  | 2  | 3  | 3  | 2  | 1  | 2  | 1  | 0  | 1  | 1  | 1  | 1  | 1  | 1  | 3  | 1  | 0  | 3  | 1  | 1  | 0  | 0  | 2  | 3  | 1  | 1  | 2  | 1  |   |
| ENSP00000246194                 | ENSG00000125970  | RALY      | 159  | 11 | 8  | 8  | 4  | 6  | 5  | 4  | 6  | 7  | 5  | 8  | 9  | 2  | 1  | 8  | 2  | 5  | 4  | 5  | 5  | 4  | 5  | 3  | 6  | 6  | 3  | 8  | 3  | 3  |    |   |
| ENSP00000246337,ENSP00000126088 | ENSG00000126088  | UROD      | 33   | 0  | 0  | 0  | 1  | 2  | 1  | 1  | 0  | 0  | 0  | 1  | 0  | 1  | 0  | 0  | 3  | 2  | 0  | 1  | 1  | 2  | 0  | 1  | 0  | 1  | 0  | 1  | 5  | 7  | 2  |   |
| ENSP00000246489,ENSP00000126214 | ENSG00000126214  | C14orf153 | 258  | 17 | 11 | 10 | 8  | 4  | 7  | 4  | 4  | 2  | 4  | 3  | 5  | 4  | 8  | 10 | 6  | 13 | 8  | 11 | 16 | 9  | 6  | 9  | 10 | 10 | 8  | 12 | 19 | 10 |    |   |
| ENSP00000246533                 | ENSG00000126247  | CAPNS1    | 375  | 13 | 13 | 7  | 20 | 17 | 12 | 16 | 10 | 14 | 3  | 13 | 8  | 17 | 9  | 11 | 12 | 13 | 13 | 18 | 14 | 13 | 6  | 13 | 10 | 12 | 14 | 14 | 10 | 20 | 10 |   |
| ENSP00000246548                 | ENSG00000126261  | UBA2      | 234  | 17 | 6  | 8  | 5  | 6  | 9  | 11 | 6  | 15 | 3  | 24 | 6  | 5  | 2  | 5  | 8  | 6  | 7  | 8  | 8  | 11 | 3  | 6  | 5  | 3  | 8  | 6  | 6  | 14 | 7  |   |
| ENSP00000246554,ENSP00000126267 | ENSG00000126267  | COX6B1    | 90   | 4  | 5  | 2  | 1  | 2  | 1  | 2  | 1  | 3  | 2  | 3  | 3  | 1  | 3  | 1  | 3  | 4  | 2  | 3  | 2  | 2  | 3  | 6  | 8  | 4  | 7  | 3  | 2  | 4  | 3  |   |
| ENSP00000246635                 | ENSG00000171401  | KRT13     | 319  | 6  | 7  | 3  | 3  | 5  | 8  | 15 | 15 | 10 | 24 | 59 | 39 | 3  | 4  | 7  | 6  | 7  | 12 | 6  | 6  | 4  | 13 | 24 | 13 | 4  | 8  | 6  | 0  | 0  | 2  |   |
| ENSP00000246639,ENSP00000197079 | ENSG00000197079  | KRT35     | 486  | 13 | 6  | 3  | 17 | 48 | 7  | 74 | 6  | 11 | 17 | 7  | 16 | 10 | 83 | 5  | 3  | 22 | 9  | 13 | 17 | 6  | 44 | 19 | 10 | 11 | 1  | 6  | 1  | 0  | 1  |   |
| ENSP00000246662                 | ENSG00000171403  | KRT9      | 172  | 6  | 16 | 4  | 3  | 2  | 17 | 7  | 1  | 6  | 1  | 0  | 16 | 5  | 2  | 11 | 0  | 3  | 1  | 7  | 4  | 8  | 3  | 4  | 21 | 1  | 2  | 10 | 1  | 0  | 10 |   |
| ENSP00000246747                 | ENSG000000213465 | ARL2      | 40   | 2  | 1  | 2  | 2  | 2  | 1  | 1  | 2  | 1  | 1  | 1  | 0  | 2  | 0  | 1  | 2  | 0  | 2  | 1  | 0  | 2  | 1  | 0  | 1  | 1  | 3  | 1  | 3  | 3  | 1  |   |
| ENSP00000246785                 | ENSG00000126453  | BCL2L12   | 12   | 3  | 2  | 1  | 0  | 0  | 0  | 0  | 0  | 0  | 0  | 0  | 0  | 1  | 0  | 1  | 1  | 0  | 0  | 0  | 1  | 1  | 0  | 0  | 0  | 0  | 0  | 0  | 0  | 1  | 0  |   |
| ENSP00000246792                 | ENSG00000126458  | RRAS      | 80   | 4  | 2  | 1  | 1  | 0  | 2  | 3  | 0  | 3  | 0  | 4  | 2  | 2  | 0  | 2  | 3  | 7  | 6  | 2  | 3  | 4  | 1  | 3  | 2  | 4  | 6  | 2  | 4  | 4  | 3  |   |
| ENSP00000246802                 | ENSG00000105373  | GLTSCR2   | 59   | 3  | 3  | 1  | 2  | 2  | 2  | 2  | 0  | 3  | 0  | 4  | 3  | 2  | 1  | 2  | 2  | 2  | 2  | 2  | 0  | 1  | 2  | 3  | 2  | 2  | 2  | 1  | 2  | 3  | 3  |   |
| ENSP00000246868                 | ENSG00000126524  | SBDS      | 176  | 13 | 7  | 5  | 4  | 7  | 7  | 2  | 8  | 4  | 1  | 5  | 4  | 4  | 5  | 3  | 5  | 4  | 2  | 5  | 7  | 5  | 7  | 13 | 4  | 6  | 8  | 4  | 6  | 14 | 7  |   |
| ENSP00000246957                 | ENSG00000126602  | TRAP1     | 960  | 34 | 26 | 26 | 36 | 35 | 25 | 21 | 20 | 20 | 13 | 34 | 16 | 29 | 39 | 26 | 37 | 52 | 24 | 32 | 46 | 26 | 26 | 37 | 22 | 42 | 45 | 23 | 50 | 57 | 41 |   |
| ENSP00000247001                 | ENSG00000105705  | SF4       | 71   | 4  | 2  | 2  | 4  | 1  | 2  | 4  | 1  | 1  | 6  | 1  | 2  | 3  | 3  | 3  | 0  | 3  | 3  | 4  | 2  | 2  | 4  | 2  | 0  | 3  | 1  | 2  | 5  | 1  | 0  |   |
| ENSP00000247003                 | ENSG00000105671  | DDX49     | 31   | 0  | 0  | 1  | 1  | 1  | 0  | 3  | 1  | 0  | 0  | 2  | 1  | 2  | 0  | 1  | 2  | 3  | 1  | 1  | 1  | 1  | 1  | 0  | 1  | 2  | 1  | 0  | 2  | 1  | 1  |   |
| ENSP00000247087,ENSP00000126705 | ENSG00000126705  | AHDC1     | 13   | 0  | 2  | 0  | 0  | 0  | 3  | 0  | 0  | 0  | 1  | 0  | 1  | 1  | 0  | 0  | 1  | 0  | 0  | 0  | 1  | 1  | 0  | 0  | 0  | 0  | 0  | 1  | 1  | 0  | 1  |   |
| ENSP00000247138,ENSP00000102100 | ENSG00000102100  | SLC35A2   | 38   | 0  | 1  | 1  | 2  | 4  | 2  | 3  | 2  | 2  | 1  | 1  | 0  | 2  | 0  | 1  | 1  | 2  | 0  | 0  | 1  | 0  | 1  | 1  | 6  | 1  | 0  | 0  | 2  | 0  | 1  |   |
| ENSP00000247170,ENSP00000100592 | ENSG00000100592  | DAAM1     | 34   | 1  | 2  | 2  | 5  | 1  | 1  | 1  | 2  | 1  | 1  | 0  | 0  | 1  | 1  | 0  | 1  | 0  | 0  | 2  | 2  | 2  | 1  | 0  | 0  | 1  | 1  | 1  | 1  | 2  | 1  |   |
| ENSP00000247225                 | ENSG00000126821  | SGPP1     | 12   | 0  | 1  | 0  | 2  | 0  | 0  | 0  | 0  | 0  | 0  | 0  | 0  | 1  | 1  | 0  | 0  | 0  | 0  | 2  | 1  | 0  | 0  | 1  | 0  | 1  | 0  | 1  | 0  | 0  | 1  |   |
| ENSP00000247461                 | ENSG00000127022  | CANX      | 1192 | 45 | 32 | 26 | 40 | 88 | 57 | 33 | 34 | 31 | 18 | 66 | 30 | 29 | 26 | 33 | 26 | 40 | 33 | 33 | 55 | 51 | 43 | 64 | 43 | 41 | 50 | 32 | 28 | 38 | 27 |   |
| ENSP00000247470,ENSP00000103490 | ENSG00000103490  | PYCARD    | 62   | 0  | 1  | 0  | 8  | 7  | 7  | 6  | 2  | 10 | 2  | 3  | 2  | 0  | 0  | 0  | 0  | 0  | 0  | 0  | 0  | 0  | 0  | 0  | 0  | 4  | 3  | 7  | 0  | 0  | 0  |   |
| ENSP00000247668                 | ENSG00000127191  | TRAF2     | 52   | 2  | 3  | 2  | 2  | 4  | 2  | 2  | 3  | 1  | 0  | 1  | 2  | 1  | 0  | 0  | 1  | 2  | 1  | 1  | 1  | 4  | 0  | 0  | 0  | 3  | 3  | 0  | 4  | 4  | 3  |   |
| ENSP00000247843                 | ENSG00000127337  | YEATS4    | 23   | 2  | 1  | 0  | 2  | 1  | 0  | 0  | 0  | 0  | 0  | 1  | 0  | 1  | 0  | 0  | 2  | 0  | 0  | 1  | 3  | 1  | 1  | 3  | 1  | 0  | 1  | 0  | 0  | 0  | 1  |   |
| ENSP00000247970                 | ENSG00000127445  | PIN1      | 23   | 2  | 0  | 0  | 0  | 1  | 0  | 0  | 1  | 1  | 0  | 2  | 0  | 0  | 1  | 0  | 2  | 0  | 1  | 1  | 1  | 0  | 0  | 0  | 0  | 1  | 1  | 1  | 1  | 4  | 2  |   |
| ENSP00000248070                 | ENSG00000127527  | EPS15L1   | 178  | 5  | 4  | 8  | 13 | 5  | 7  | 9  | 1  | 1  | 2  | 1  | 6  | 4  | 0  | 5  | 11 | 6  | 6  | 8  | 5  | 6  | 2  | 4  | 0  | 14 | 14 | 8  | 9  | 6  | 8  |   |
| ENSP00000248098                 | ENSG00000206053  | HN1L      | 81   | 4  | 3  | 6  | 3  | 4  | 4  | 3  | 2  | 1  | 1  | 2  | 1  | 2  | 5  | 2  | 3  | 3  | 2  | 3  | 5  | 2  | 2  | 1  | 1  | 4  | 3  | 2  | 3  | 3  | 1  |   |
| ENSP00000248114                 | ENSG00000127554  | GFER      | 38   | 1  | 0  | 1  | 0  | 1  | 0  | 0  | 0  | 1  | 0  | 2  | 0  | 0  | 2  | 1  | 1  | 5  | 2  | 1  | 2  | 2  | 1  | 5  | 1  | 1  | 1  | 2  | 1  | 1  | 3  |   |
| ENSP00000248125                 | ENSG00000167962  | ZNF598    | 71   | 0  | 1  | 4  | 2  | 1  | 0  | 2  | 3  | 1  | 0  | 1  | 0  | 2  | 4  | 3  | 1  | 1  | 0  | 4  | 6  | 3  | 1  | 2  | 0  | 4  | 6  | 4  | 9  | 5  | 1  |   |
| ENSP00000248272                 | ENSG00000127688  | GAN       | 28   | 3  | 1  | 2  | 0  | 0  | 1  | 0  | 0  | 0  | 0  | 1  | 0  | 4  | 0  | 4  | 0  | 1  | 3  | 3  | 0  | 1  | 0  | 1  | 0  | 0  | 1  | 1  | 0  | 0  | 1  |   |
| ENSP00000248342                 | ENSG00000178982  | EIF3K     | 88   | 3  | 2  | 1  | 2  | 5  | 2  | 0  | 2  | 6  | 0  | 3  | 1  | 5  | 0  | 3  | 6  | 3  | 3  | 4  | 5  | 4  | 2  | 4  | 3  | 2  | 3  | 3  | 4  | 3  | 4  |   |
| ENSP00000248437                 | ENSG00000127824  | TUBA4A    | 444  | 15 | 18 | 8  | 9  | 12 | 21 | 6  | 5  | 17 | 3  | 27 | 6  | 14 | 7  | 13 | 13 | 4  | 13 | 9  | 20 | 21 | 4  | 15 | 9  | 25 | 33 | 21 | 12 | 43 | 21 |   |
| ENSP00000248450                 | ENSG00000127837  | AAMP      | 39   | 3  | 2  | 2  | 3  | 3  | 1  | 2  | 1  | 1  | 0  | 1  | 0  | 1  | 0  | 1  | 1  | 1  | 1  | 2  | 1  | 0  | 0  | 1  | 1  | 1  | 3  | 1  | 2  | 2  | 2  |   |
| ENSP00000248451                 | ENSG00000127838  | PNKD      | 41   | 0  | 2  | 2  | 1  | 1  | 2  | 1  | 2  | 1  | 0  | 0  | 1  | 1  | 1  | 2  | 1  | 2  | 1  | 0  | 2  | 2  | 2  | 2  | 1  | 3  | 3  | 1  | 2  | 1  | 1  |   |
| ENSP00000248553                 | ENSG00000106211  | HSPB1     | 268  | 13 | 7  | 12 | 3  | 5  | 4  | 2  | 0  | 2  | 7  | 7  | 7  | 14 | 9  | 15 | 9  | 10 | 16 | 25 | 16 | 0  | 2  | 0  | 1  | 6  | 1  | 20 | 20 | 19 | 1  |   |
| ENSP00000248633                 | ENSG00000127980  | PEX1      | 18   | 0  | 1  | 1  | 1  | 1  | 1  | 0  | 1  | 0  | 0  | 0  | 0  | 2  | 1  | 1  | 0  | 1  | 0  | 0  | 1  | 1  | 2  | 0  | 0  | 0  | 0  | 0  | 0  | 2  | 0  | 1 |
| ENSP00000248845,ENSP00000137169 | ENSG00000137169  | RP3-402G  | 12   | 0  | 0  | 0  | 2  | 0  | 0  | 1  | 0  | 1  | 0  | 0  | 0  | 0  | 0  | 1  | 2  | 1  | 2  | 1  | 0  | 1  | 0  | 0  | 0  | 0  | 0  | 0  | 0  | 0  | 0  |   |
| ENSP00000248846                 | ENSG00000128159  | TUBGCP6   | 13   | 0  | 2  | 1  | 0  | 2  | 0  | 0  | 0  | 0  | 2  | 0  | 0  | 0  | 2  | 0  | 0  | 0  | 0  | 2  | 0  | 0  | 0  | 0  | 0  | 0  | 1  | 0  | 0  | 0  | 0  |   |
| ENSP00000248923,ENSP00000133475 | ENSG00000133475  | GGT2      | 13   | 0  | 0  | 0  | 1  | 0  | 2  | 0  | 0  | 0  | 0  | 0  | 0  | 2  | 0  | 3  | 0  | 0  | 1  | 0  | 0  | 1  | 0  | 0  | 0  | 0  | 2  | 1  | 0  | 0  | 0  |   |
| ENSP00000248935                 | ENSG00000184674  | GSTT1     | 22   | 0  | 0  | 0  | 0  | 1  | 2  | 0  | 0  | 1  | 0  | 1  | 0  | 1  | 0  | 1  | 0  | 0  | 0  | 0  | 1  | 0  | 0  | 0  | 0  | 2  | 3  | 5  | 0  | 3  | 1  |   |
| ENSP00000248958                 | ENSG00000128228  | SDF2L1    | 57   | 2  | 0  | 2  | 3  | 2  | 2  | 2  | 0  | 1  | 2  | 2  | 1  | 1  | 4  | 3  | 2  | 2  | 2  | 2  | 2  | 2  | 1  | 3  | 2  | 2  | 4  | 1  | 3  | 1  | 1  |   |
| ENSP00000248975                 | ENSG00000128245  | YWHAH     | 509  | 20 | 18 | 11 | 9  | 23 | 23 | 15 | 14 | 18 | 5  | 15 | 11 | 12 | 16 | 22 | 14 | 21 | 21 | 22 | 27 | 17 | 11 | 16 | 9  | 20 | 27 | 24 | 14 | 19 | 15 |   |
| ENSP00000249066,ENSP00000128335 | ENSG00000128335  | APOL2     | 26   | 0  | 1  | 0  | 3  | 0  | 1  | 2  | 1  | 0  | 0  | 0  | 1  | 0  | 3  | 2  | 0  | 0  | 0  | 2  | 1  | 1  | 4  | 3  | 1  | 0  | 0  | 0  | 0  | 0  | 0  |   |
| ENSP00000249269                 | ENSG00000105819  | PMPCB     | 146  | 3  | 3  | 4  | 3  | 3  | 4  | 7  | 3  | 7  | 5  | 8  | 4  | 5  | 4  | 4  | 8  | 3  | 6  | 4  | 2  | 7  | 3  | 2  | 4  | 4  | 7  | 7  | 5  | 9  | 8  |   |
| ENSP00000249270                 | ENSG00000105821  | DNAJB2    | 131  | 6  | 6  | 9  | 3  | 2  | 2  | 5  | 3  | 4  | 3  | 4  | 2  | 2  | 10 | 5  | 2  | 4  | 2  | 6  | 5  | 5  | 2  | 2  | 5  | 4  | 5  | 6  | 6  | 5  | 6  |   |
| ENSP00000249289                 | ENSG00000128524  | ATP6V1F   | 60   | 5  | 3  | 3  | 2  | 3  | 2  | 0  | 1  | 2  | 1  | 1  | 2  | 2  | 1  | 1  | 0  | 1  | 3  | 1  | 1  | 2  | 0  | 2  | 2  | 4  | 3  | 2  | 3  | 3  | 4  |   |
| ENSP00000249299                 | ENSG00000128534  | LSM8      | 35   | 3  | 0  | 0  | 0  | 0  | 2  | 1  | 0  | 2  | 0  | 1  | 2  | 2  | 0  | 1  | 2  | 1  | 1  | 0  | 0  | 2  | 0  | 3  | 2  | 1  | 1  | 3  | 1  | 2  | 2  |   |
| ENSP00000249364                 | ENSG00000128595  | CALU      | 572  | 25 | 22 | 30 | 10 | 16 | 9  | 22 | 9  | 17 | 11 | 19 | 14 | 22 | 24 | 25 | 13 | 27 | 17 |    |    |    |    |    |    |    |    |    |    |    |    |   |

|                                            |                  |          |      |    |    |    |    |     |     |     |    |    |     |     |     |    |    |    |    |     |     |    |     |    |    |     |    |     |     |     |    |    |    |   |   |   |
|--------------------------------------------|------------------|----------|------|----|----|----|----|-----|-----|-----|----|----|-----|-----|-----|----|----|----|----|-----|-----|----|-----|----|----|-----|----|-----|-----|-----|----|----|----|---|---|---|
| ENSP00000251900,ENSP000000:ENSG00000102098 | SCML2            | 13       | 2    | 0  | 1  | 0  | 0  | 0   | 0   | 0   | 1  | 0  | 0   | 0   | 0   | 1  | 0  | 0  | 0  | 0   | 1   | 0  | 0   | 0  | 1  | 0   | 1  | 1   | 3   | 1   | 0  | 0  | 1  | 0 | 0 | 0 |
| ENSP00000251968                            | ENSG000000174391 | TSGL1    | 138  | 5  | 3  | 3  | 6  | 6   | 5   | 8   | 4  | 5  | 1   | 1   | 1   | 3  | 0  | 5  | 4  | 6   | 5   | 7  | 11  | 2  | 3  | 6   | 0  | 6   | 8   | 5   | 10 | 5  | 5  | 4 |   |   |
| ENSP00000252015                            | ENSG00000100991  | TRPC4AP  | 25   | 3  | 1  | 1  | 2  | 0   | 0   | 1   | 1  | 0  | 1   | 0   | 1   | 1  | 1  | 0  | 1  | 0   | 1   | 0  | 0   | 0  | 1  | 1   | 1  | 1   | 1   | 0   | 1  | 0  | 1  | 0 | 2 |   |
| ENSP00000252102                            | ENSG00000131495  | NDUFA2   | 15   | 0  | 2  | 0  | 0  | 0   | 1   | 1   | 0  | 1  | 0   | 1   | 0   | 0  | 0  | 0  | 0  | 1   | 0   | 0  | 0   | 0  | 0  | 0   | 2  | 2   | 0   | 1   | 0  | 1  | 2  |   |   |   |
| ENSP00000252108                            | ENSG00000110344  | UBE4A    | 65   | 7  | 3  | 4  | 1  | 2   | 1   | 2   | 2  | 1  | 1   | 0   | 1   | 1  | 0  | 1  | 2  | 4   | 2   | 2  | 3   | 4  | 3  | 1   | 1  | 4   | 2   | 3   | 2  | 1  | 4  |   |   |   |
| ENSP00000252115,ENSP000000:ENSG00000100227 | WOLDIP3          | 49       | 2    | 3  | 2  | 0  | 1  | 0   | 2   | 0   | 0  | 0  | 3   | 1   | 3   | 0  | 2  | 3  | 1  | 2   | 2   | 3  | 3   | 2  | 1  | 1   | 2  | 3   | 1   | 1   | 4  | 1  |    |   |   |   |
| ENSP00000252172                            | ENSG00000006788  | MYH13    | 49   | 3  | 4  | 0  | 0  | 0   | 2   | 2   | 0  | 3  | 1   | 1   | 1   | 2  | 0  | 2  | 1  | 0   | 2   | 1  | 3   | 3  | 0  | 1   | 1  | 3   | 3   | 2   | 2  | 4  | 2  |   |   |   |
| ENSP00000252173,ENSP000000:ENSG00000133020 | MYH8             | 13       | 0    | 1  | 0  | 0  | 0  | 1   | 1   | 0   | 0  | 0  | 0   | 0   | 0   | 0  | 2  | 1  | 0  | 1   | 1   | 1  | 0   | 0  | 0  | 0   | 0  | 0   | 0   | 0   | 1  | 2  | 1  |   |   |   |
| ENSP00000252242                            | ENSG00000186081  | KRT5     | 716  | 5  | 2  | 0  | 4  | 7   | 9   | 6   | 12 | 4  | 102 | 338 | 163 | 2  | 1  | 3  | 0  | 5   | 5   | 4  | 4   | 4  | 3  | 3   | 8  | 8   | 2   | 5   | 6  | 0  | 1  | 3 |   |   |
| ENSP00000252244                            | ENSG00000167768  | KRT1     | 832  | 32 | 30 | 14 | 20 | 28  | 40  | 34  | 58 | 39 | 6   | 36  | 59  | 13 | 26 | 34 | 6  | 17  | 27  | 19 | 33  | 24 | 33 | 49  | 46 | 13  | 23  | 34  | 7  | 6  | 26 |   |   |   |
| ENSP00000252245                            | ENSG00000170454  | KRT75    | 698  | 18 | 9  | 13 | 25 | 29  | 15  | 57  | 57 | 9  | 30  | 92  | 49  | 21 | 19 | 10 | 36 | 23  | 11  | 24 | 21  | 8  | 24 | 36  | 13 | 18  | 12  | 12  | 2  | 2  | 3  |   |   |   |
| ENSP00000252250                            | ENSG00000170465  | KRT6C    | 942  | 16 | 12 | 13 | 31 | 89  | 30  | 105 | 26 | 20 | 40  | 150 | 71  | 15 | 4  | 18 | 16 | 54  | 20  | 26 | 36  | 14 | 20 | 36  | 24 | 16  | 13  | 16  | 3  | 3  | 5  |   |   |   |
| ENSP00000252252                            | ENSG00000185479  | KRT6B    | 926  | 16 | 15 | 13 | 35 | 94  | 34  | 106 | 27 | 20 | 25  | 131 | 63  | 16 | 5  | 20 | 15 | 54  | 20  | 27 | 37  | 14 | 20 | 34  | 26 | 16  | 13  | 17  | 3  | 4  | 6  |   |   |   |
| ENSP00000252268                            | ENSG00000133884  | DPF2     | 100  | 3  | 3  | 2  | 3  | 2   | 3   | 3   | 2  | 3  | 4   | 7   | 3   | 4  | 4  | 3  | 4  | 3   | 4   | 7  | 3   | 3  | 3  | 3   | 4  | 3   | 3   | 2   | 3  | 2  | 3  |   |   |   |
| ENSP00000252288                            | ENSG00000130005  | GAMT     | 11   | 1  | 2  | 0  | 0  | 0   | 0   | 0   | 0  | 0  | 0   | 0   | 0   | 0  | 0  | 1  | 2  | 2   | 1   | 1  | 1   | 1  | 0  | 0   | 0  | 0   | 0   | 0   | 0  | 0  | 0  |   |   |   |
| ENSP00000252444                            | ENSG00000130164  | LDLR     | 23   | 0  | 0  | 0  | 0  | 0   | 0   | 1   | 0  | 0  | 2   | 4   | 2   | 1  | 0  | 0  | 0  | 0   | 0   | 1  | 1   | 2  | 1  | 1   | 2  | 0   | 0   | 0   | 0  | 1  | 3  | 1 |   |   |
| ENSP00000252455                            | ENSG00000130175  | PRKCSH   | 894  | 37 | 24 | 37 | 25 | 39  | 21  | 29  | 19 | 30 | 27  | 36  | 23  | 25 | 34 | 21 | 24 | 44  | 23  | 29 | 39  | 29 | 38 | 50  | 30 | 26  | 36  | 11  | 33 | 35 | 20 |   |   |   |
| ENSP00000252483                            | ENSG00000130202  | PVRL2    | 45   | 4  | 1  | 3  | 1  | 1   | 0   | 1   | 2  | 1  | 1   | 0   | 1   | 2  | 1  | 2  | 1  | 1   | 1   | 1  | 1   | 2  | 1  | 4   | 1  | 4   | 2   | 0   | 1  | 2  | 2  |   |   |   |
| ENSP00000252485                            | ENSG00000130202  | PVRL2    | 47   | 5  | 1  | 2  | 1  | 2   | 0   | 2   | 2  | 1  | 1   | 0   | 1   | 1  | 2  | 1  | 1  | 1   | 1   | 1  | 2   | 1  | 4  | 2   | 4  | 2   | 0   | 1   | 2  | 2  |    |   |   |   |
| ENSP00000252486                            | ENSG00000130203  | APOE     | 89   | 32 | 28 | 27 | 0  | 1   | 0   | 0   | 0  | 1  | 0   | 0   | 0   | 0  | 0  | 0  | 0  | 0   | 0   | 0  | 0   | 0  | 0  | 0   | 0  | 0   | 0   | 0   | 0  | 0  | 0  |   |   |   |
| ENSP00000252487,ENSP000000:ENSG00000130204 | TOMM40           | 320      | 17   | 10 | 7  | 7  | 8  | 10  | 10  | 4   | 11 | 6  | 23  | 13  | 8   | 7  | 11 | 9  | 13 | 11  | 8   | 10 | 12  | 9  | 16 | 9   | 9  | 14  | 10  | 18  | 10 |    |    |   |   |   |
| ENSP00000252512                            | ENSG00000130227  | XPO7     | 134  | 7  | 7  | 9  | 5  | 6   | 3   | 1   | 3  | 1  | 2   | 5   | 2   | 4  | 2  | 5  | 3  | 6   | 3   | 7  | 7   | 6  | 0  | 1   | 1  | 5   | 6   | 3   | 7  | 8  | 9  |   |   |   |
| ENSP00000252530                            | ENSG00000130244  | FAM98C   | 25   | 0  | 0  | 0  | 0  | 0   | 2   | 1   | 0  | 0  | 0   | 1   | 0   | 0  | 0  | 0  | 1  | 0   | 1   | 1  | 0   | 0  | 0  | 1   | 0  | 5   | 5   | 0   | 4  | 3  | 0  |   |   |   |
| ENSP00000252542                            | ENSG00000130254  | SAFB2    | 284  | 13 | 6  | 16 | 8  | 10  | 10  | 8   | 7  | 5  | 12  | 16  | 10  | 6  | 7  | 8  | 8  | 5   | 5   | 8  | 15  | 10 | 14 | 15  | 11 | 10  | 11  | 5   | 10 | 8  | 7  |   |   |   |
| ENSP00000252543,ENSP000000:ENSG00000130255 | RPL36            | 410      | 12   | 8  | 15 | 14 | 20 | 11  | 17  | 9   | 9  | 11 | 11  | 11  | 10  | 32 | 9  | 15 | 20 | 12  | 14  | 17 | 8   | 16 | 14 | 8   | 22 | 14  | 10  | 19  | 13 | 9  |    |   |   |   |
| ENSP00000252576                            | ENSG00000130288  |          | 160  | 4  | 1  | 5  | 4  | 5   | 3   | 6   | 3  | 5  | 3   | 7   | 6   | 5  | 2  | 5  | 5  | 9   | 6   | 4  | 5   | 4  | 7  | 8   | 6  | 8   | 8   | 4   | 7  | 9  | 6  |   |   |   |
| ENSP00000252593                            | ENSG00000130303  | BST2     | 16   | 1  | 1  | 0  | 1  | 0   | 0   | 2   | 2  | 1  | 0   | 0   | 0   | 0  | 0  | 0  | 0  | 0   | 0   | 0  | 0   | 0  | 2  | 1   | 1  | 0   | 0   | 0   | 2  | 1  | 1  |   |   |   |
| ENSP00000252594,ENSP000000:ENSG00000130305 | NSUN5            | 84       | 5    | 3  | 2  | 3  | 1  | 2   | 3   | 1   | 3  | 5  | 2   | 2   | 2   | 2  | 2  | 5  | 4  | 5   | 2   | 2  | 2   | 2  | 6  | 3   | 2  | 0   | 0   | 6   | 4  | 2  |    |   |   |   |
| ENSP00000252595                            | ENSG00000130304  | SLC27A1  | 17   | 1  | 0  | 0  | 2  | 1   | 1   | 0   | 0  | 0  | 1   | 0   | 1   | 0  | 1  | 1  | 1  | 1   | 0   | 0  | 0   | 0  | 1  | 1   | 1  | 1   | 1   | 0   | 1  | 1  | 0  |   |   |   |
| ENSP00000252599                            | ENSG00000130309  | GLT25D1  | 162  | 11 | 10 | 8  | 2  | 2   | 2   | 4   | 2  | 7  | 3   | 4   | 1   | 6  | 5  | 9  | 4  | 5   | 5   | 8  | 11  | 10 | 1  | 2   | 2  | 6   | 9   | 8   | 6  | 4  | 5  |   |   |   |
| ENSP00000252603                            | ENSG00000130313  | PGLS     | 92   | 2  | 2  | 5  | 3  | 8   | 3   | 2   | 3  | 2  | 5   | 2   | 2   | 3  | 5  | 2  | 3  | 5   | 2   | 3  | 4   | 3  | 2  | 3   | 1  | 4   | 3   | 3   | 3  | 2  | 2  |   |   |   |
| ENSP00000252631,ENSP000000:ENSG00000130340 | SNX9             | 38       | 0    | 0  | 2  | 2  | 0  | 0   | 0   | 0   | 1  | 0  | 0   | 1   | 4   | 1  | 0  | 6  | 2  | 1   | 3   | 1  | 1   | 2  | 3  | 0   | 0  | 3   | 2   | 0   | 2  | 1  |    |   |   |   |
| ENSP00000252692                            | ENSG00000130396  | MLLT4    | 126  | 5  | 5  | 4  | 5  | 2   | 2   | 11  | 4  | 5  | 0   | 2   | 3   | 3  | 6  | 4  | 2  | 2   | 4   | 12 | 8   | 3  | 6  | 10  | 4  | 3   | 3   | 6   | 0  | 2  | 0  |   |   |   |
| ENSP00000252699                            | ENSG00000130402  | ACTN4    | 3124 | 97 | 73 | 83 | 81 | 168 | 109 | 108 | 90 | 96 | 118 | 243 | 114 | 76 | 57 | 73 | 95 | 128 | 100 | 98 | 120 | 93 | 84 | 121 | 74 | 152 | 138 | 108 | 71 | 92 | 64 |   |   |   |
| ENSP00000252725                            | ENSG00000130429  | ARPC1B   | 37   | 6  | 0  | 0  | 2  | 1   | 1   | 2   | 1  | 1  | 0   | 3   | 0   | 2  | 0  | 1  | 2  | 0   | 0   | 1  | 1   | 0  | 0  | 3   | 1  | 0   | 4   | 0   | 1  | 2  | 2  |   |   |   |
| ENSP00000252809                            | ENSG00000130513  | GDF15    | 18   | 0  | 0  | 0  | 0  | 2   | 1   | 0   | 2  | 0  | 0   | 0   | 0   | 0  | 0  | 1  | 3  | 3   | 1   | 0  | 0   | 1  | 1  | 0   | 0  | 1   | 1   | 1   | 0  | 0  | 0  |   |   |   |
| ENSP00000252816                            | ENSG00000130520  | LSM4     | 181  | 6  | 7  | 5  | 7  | 8   | 6   | 5   | 0  | 4  | 3   | 3   | 5   | 3  | 5  | 8  | 6  | 12  | 6   | 6  | 6   | 6  | 11 | 7   | 6  | 9   | 4   | 4   | 9  | 8  | 6  |   |   |   |
| ENSP00000252818                            | ENSG00000130522  | JUND     | 18   | 0  | 0  | 0  | 0  | 1   | 1   | 0   | 0  | 0  | 1   | 0   | 0   | 1  | 1  | 0  | 1  | 1   | 0   | 2  | 1   | 0  | 2  | 1   | 1  | 0   | 0   | 0   | 1  | 1  | 2  |   |   |   |
| ENSP00000252889                            | ENSG00000130589  | RP4-697K | 26   | 0  | 0  | 0  | 1  | 0   | 0   | 7   | 3  | 2  | 1   | 0   | 1   | 0  | 0  | 0  | 1  | 0   | 1   | 0  | 1   | 2  | 1  | 0   | 0  | 2   | 1   | 0   | 0  | 1  | 1  |   |   |   |
| ENSP00000252891                            | ENSG00000105245  | NUMBL    | 20   | 0  | 1  | 1  | 3  | 1   | 1   | 1   | 1  | 0  | 0   | 1   | 1   | 0  | 0  | 0  | 0  | 1   | 0   | 1  | 0   | 2  | 0  | 0   | 0  | 1   | 1   | 0   | 0  | 2  | 0  |   |   |   |
| ENSP00000252934                            | ENSG00000130638  | ATXN10   | 227  | 12 | 7  | 3  | 10 | 11  | 5   | 6   | 4  | 3  | 1   | 4   | 3   | 11 | 10 | 8  | 9  | 12  | 7   | 9  | 14  | 10 | 3  | 6   | 7  | 10  | 7   | 5   | 9  | 13 | 8  |   |   |   |
| ENSP00000252936,ENSP000000:ENSG00000130640 | TUBGCP2          | 55       | 3    | 2  | 0  | 6  | 6  | 5   | 6   | 1   | 1  | 0  | 0   | 0   | 3   | 0  | 1  | 3  | 0  | 2   | 5   | 1  | 1   | 0  | 0  | 0   | 1  | 3   | 2   | 0   | 3  | 0  | 0  |   |   |   |
| ENSP00000252992                            | ENSG00000130695  | CCDC21   | 20   | 1  | 0  | 0  | 0  | 0   | 2   | 2   | 1  | 0  | 0   | 0   | 1   | 0  | 0  | 0  | 1  | 1   | 0   | 3  | 3   | 1  | 1  | 0   | 0  | 1   | 0   | 1   | 0  | 0  | 1  |   |   |   |
| ENSP00000252996,ENSP000000:ENSG00000130699 | TAF4             | 37       | 3    | 0  | 1  | 2  | 1  | 1   | 3   | 0   | 0  | 1  | 2   | 0   | 1   | 2  | 3  | 0  | 1  | 2   | 2   | 0  | 0   | 2  | 3  | 1   | 1  | 1   | 1   | 0   | 1  | 1  | 1  |   |   |   |
| ENSP00000253003,ENSP000000:ENSG00000130706 | ADRM1            | 65       | 6    | 4  | 2  | 2  | 2  | 1   | 1   | 1   | 2  | 0  | 3   | 2   | 2   | 3  | 2  | 1  | 3  | 2   | 2   | 3  | 2   | 1  | 2  | 1   | 1  | 3   | 4   | 3   | 2  | 2  |    |   |   |   |
| ENSP00000253004,ENSP000000:ENSG00000130707 | ASS1             | 243      | 4    | 5  | 2  | 11 | 14 | 18  | 7   | 5   | 6  | 2  | 5   | 6   | 11  | 5  | 8  | 5  | 8  | 6   | 16  | 12 | 11  | 9  | 11 | 10  | 14 | 10  | 15  | 2   | 2  | 2  |    |   |   |   |
| ENSP00000253023                            | ENSG00000130725  | UBE2M    | 167  | 9  | 6  | 6  | 4  | 6   | 6   | 5   | 6  | 4  | 3   | 9   | 5   | 4  | 1  | 3  | 7  | 7   | 7   | 8  | 7   | 5  | 4  | 8   | 4  | 4   | 7   | 6   | 5  | 7  | 4  |   |   |   |
| ENSP00000253024                            | ENSG00000130726  | TRIM28   | 1177 | 55 | 46 | 42 | 17 | 24  | 29  | 25  | 22 | 32 | 49  | 83  | 43  | 24 | 30 | 31 | 32 | 45  | 32  | 29 | 53  | 42 | 28 | 47  | 31 | 42  | 51  | 35  | 48 | 65 | 44 |   |   |   |
| ENSP00000253039                            | ENSG00000130741  | EIF2S3   | 375  | 15 | 7  | 8  | 15 | 21  | 14  | 14  | 11 | 7  | 8   | 15  | 10  | 10 | 14 | 11 | 16 | 21  | 10  | 15 | 20  | 9  | 11 | 10  | 8  | 15  | 11  | 5   | 13 | 17 | 14 |   |   |   |
| ENSP00000253048                            | ENSG00000130749  | ZC3H4    | 62   | 1  | 3  | 2  | 4  | 2   | 4   | 3   | 3  | 1  | 2   | 1   | 2   | 0  | 0  | 2  | 0  | 1   | 2   | 5  | 1   |    |    |     |    |     |     |     |    |    |    |   |   |   |

|                                            |           |     |    |    |    |    |    |    |    |    |    |    |    |    |    |    |    |    |    |    |    |    |    |    |    |    |    |    |    |    |    |    |   |
|--------------------------------------------|-----------|-----|----|----|----|----|----|----|----|----|----|----|----|----|----|----|----|----|----|----|----|----|----|----|----|----|----|----|----|----|----|----|---|
| ENSP00000254675,ENSP000000:ENSG00000132341 | RAN       | 261 | 16 | 8  | 7  | 7  | 11 | 9  | 8  | 7  | 6  | 1  | 8  | 7  | 7  | 8  | 6  | 8  | 11 | 9  | 11 | 13 | 8  | 5  | 9  | 6  | 13 | 11 | 10 | 9  | 15 | 7  |   |
| ENSP00000254718,ENSP000000:ENSG00000132382 | MYBBP1A   | 472 | 10 | 7  | 5  | 7  | 8  | 14 | 16 | 9  | 11 | 14 | 24 | 12 | 11 | 7  | 11 | 11 | 22 | 21 | 16 | 21 | 19 | 18 | 27 | 17 | 21 | 21 | 16 | 20 | 36 | 20 |   |
| ENSP00000254719                            | RP1A      | 249 | 14 | 8  | 3  | 10 | 10 | 13 | 8  | 3  | 5  | 3  | 18 | 7  | 8  | 1  | 6  | 9  | 13 | 9  | 9  | 6  | 7  | 2  | 9  | 10 | 13 | 12 | 4  | 10 | 10 | 9  |   |
| ENSP00000254730                            | EEFSEC    | 16  | 1  | 0  | 0  | 3  | 1  | 2  | 1  | 0  | 1  | 0  | 1  | 0  | 0  | 0  | 1  | 0  | 0  | 0  | 1  | 1  | 1  | 0  | 1  | 0  | 1  | 0  | 0  | 0  | 0  | 0  |   |
| ENSP00000254759                            | COQ3      | 72  | 3  | 1  | 1  | 1  | 4  | 2  | 3  | 5  | 1  | 1  | 4  | 1  | 1  | 0  | 3  | 1  | 3  | 2  | 3  | 1  | 1  | 2  | 3  | 2  | 5  | 6  | 4  | 3  | 4  | 1  |   |
| ENSP00000254770                            | LANCL2    | 91  | 3  | 1  | 1  | 5  | 3  | 5  | 2  | 1  | 2  | 1  | 6  | 3  | 3  | 2  | 1  | 3  | 5  | 2  | 3  | 4  | 5  | 1  | 4  | 1  | 7  | 7  | 4  | 0  | 3  | 3  |   |
| ENSP00000254799                            | GRSF1     | 139 | 3  | 8  | 1  | 4  | 2  | 3  | 7  | 0  | 9  | 1  | 4  | 2  | 2  | 1  | 7  | 9  | 5  | 5  | 4  | 8  | 8  | 3  | 2  | 2  | 4  | 10 | 8  | 4  | 6  | 7  |   |
| ENSP00000254803                            | UTP3      | 109 | 5  | 5  | 0  | 1  | 0  | 1  | 2  | 1  | 3  | 1  | 11 | 5  | 2  | 1  | 7  | 3  | 4  | 6  | 3  | 3  | 6  | 0  | 8  | 3  | 1  | 7  | 2  | 2  | 12 | 4  |   |
| ENSP00000254806                            | WBP2      | 15  | 1  | 0  | 1  | 1  | 1  | 0  | 0  | 0  | 0  | 0  | 0  | 1  | 0  | 1  | 0  | 0  | 1  | 0  | 1  | 1  | 0  | 0  | 0  | 0  | 0  | 1  | 1  | 1  | 2  | 1  |   |
| ENSP00000254816                            | TRIM47    | 20  | 0  | 0  | 0  | 0  | 1  | 0  | 0  | 0  | 0  | 0  | 1  | 1  | 0  | 1  | 0  | 2  | 4  | 5  | 2  | 0  | 0  | 1  | 1  | 0  | 0  | 0  | 0  | 1  | 0  | 0  |   |
| ENSP00000254878                            | HRSP12    | 13  | 1  | 1  | 0  | 0  | 0  | 1  | 0  | 0  | 0  | 1  | 1  | 1  | 0  | 0  | 0  | 0  | 0  | 0  | 0  | 0  | 1  | 0  | 0  | 0  | 0  | 0  | 0  | 1  | 2  | 3  |   |
| ENSP00000254900,ENSP000000:ENSG00000112983 | BRD8      | 26  | 3  | 1  | 0  | 1  | 0  | 1  | 2  | 0  | 0  | 1  | 2  | 0  | 2  | 0  | 1  | 0  | 0  | 0  | 2  | 1  | 2  | 2  | 1  | 2  | 0  | 0  | 1  | 0  | 0  | 1  |   |
| ENSP00000254928                            | ERAL1     | 33  | 4  | 2  | 1  | 0  | 0  | 1  | 0  | 0  | 1  | 0  | 2  | 1  | 1  | 1  | 3  | 2  | 1  | 2  | 0  | 1  | 0  | 1  | 1  | 0  | 2  | 1  | 1  | 2  | 0  | 2  |   |
| ENSP00000254940,ENSP000000:ENSG00000132603 | NIP7      | 18  | 1  | 1  | 0  | 0  | 0  | 0  | 1  | 0  | 0  | 0  | 0  | 0  | 1  | 0  | 1  | 0  | 1  | 0  | 1  | 0  | 0  | 1  | 0  | 0  | 4  | 2  | 0  | 3  | 0  | 2  |   |
| ENSP00000254942                            | TERF2     | 58  | 3  | 2  | 2  | 1  | 1  | 3  | 2  | 1  | 3  | 1  | 2  | 2  | 0  | 0  | 2  | 3  | 3  | 3  | 1  | 1  | 1  | 2  | 4  | 4  | 2  | 5  | 1  | 1  | 1  | 1  |   |
| ENSP00000254950                            | VPS4A     | 72  | 4  | 4  | 3  | 2  | 3  | 0  | 2  | 2  | 2  | 0  | 0  | 0  | 1  | 2  | 1  | 4  | 3  | 5  | 3  | 4  | 3  | 1  | 1  | 1  | 0  | 3  | 4  | 1  | 4  | 2  | 7 |
| ENSP00000254957                            | VAC14     | 13  | 0  | 0  | 0  | 0  | 0  | 0  | 0  | 0  | 1  | 1  | 0  | 0  | 0  | 0  | 0  | 1  | 1  | 0  | 2  | 2  | 0  | 0  | 0  | 0  | 1  | 1  | 0  | 1  | 1  | 1  |   |
| ENSP00000255024                            | NES       | 143 | 27 | 7  | 12 | 0  | 0  | 0  | 0  | 0  | 0  | 22 | 39 | 34 | 1  | 0  | 0  | 0  | 0  | 0  | 0  | 0  | 0  | 0  | 1  | 0  | 0  | 0  | 0  | 0  | 0  | 0  | 0 |
| ENSP00000255078                            | IGHMBP2   | 11  | 0  | 0  | 0  | 2  | 0  | 0  | 3  | 0  | 0  | 0  | 0  | 0  | 0  | 0  | 0  | 0  | 0  | 2  | 1  | 0  | 1  | 0  | 0  | 0  | 0  | 0  | 0  | 1  | 0  | 1  |   |
| ENSP00000255108                            | DPH2      | 14  | 1  | 0  | 0  | 0  | 0  | 0  | 0  | 0  | 1  | 0  | 0  | 0  | 0  | 1  | 0  | 1  | 1  | 1  | 0  | 0  | 1  | 0  | 0  | 0  | 0  | 1  | 2  | 1  | 1  | 1  |   |
| ENSP00000255120                            | NASP      | 435 | 23 | 11 | 22 | 17 | 17 | 11 | 10 | 7  | 10 | 7  | 13 | 6  | 12 | 17 | 14 | 7  | 13 | 10 | 18 | 33 | 25 | 7  | 11 | 10 | 13 | 19 | 9  | 22 | 20 | 21 |   |
| ENSP00000255194                            | AP3B1     | 135 | 8  | 5  | 3  | 4  | 5  | 5  | 7  | 4  | 6  | 0  | 5  | 0  | 4  | 2  | 3  | 2  | 7  | 5  | 4  | 10 | 4  | 2  | 6  | 2  | 6  | 9  | 6  | 2  | 5  | 4  |   |
| ENSP00000255468                            | COG6      | 74  | 3  | 0  | 0  | 7  | 3  | 7  | 3  | 0  | 3  | 0  | 1  | 1  | 5  | 1  | 3  | 3  | 5  | 0  | 4  | 3  | 2  | 2  | 2  | 1  | 7  | 3  | 2  | 1  | 0  | 2  |   |
| ENSP00000255486,ENSP000000:ENSG00000133121 | STARD13   | 22  | 1  | 1  | 0  | 1  | 1  | 1  | 0  | 0  | 1  | 0  | 0  | 1  | 0  | 0  | 1  | 0  | 2  | 1  | 1  | 1  | 1  | 0  | 1  | 1  | 0  | 2  | 2  | 1  | 0  | 1  |   |
| ENSP00000255631                            | HSPBP1    | 144 | 7  | 4  | 8  | 4  | 8  | 3  | 4  | 5  | 3  | 7  | 6  | 2  | 5  | 6  | 5  | 3  | 4  | 4  | 3  | 11 | 3  | 7  | 4  | 2  | 5  | 5  | 3  | 7  | 2  | 4  |   |
| ENSP00000255681                            | MACROD1   | 77  | 2  | 1  | 1  | 2  | 4  | 2  | 2  | 3  | 4  | 2  | 6  | 2  | 0  | 0  | 0  | 1  | 7  | 4  | 1  | 1  | 3  | 4  | 4  | 3  | 2  | 2  | 3  | 3  | 5  | 3  |   |
| ENSP00000255784                            | CCDC134   | 35  | 4  | 2  | 2  | 1  | 1  | 1  | 2  | 0  | 1  | 1  | 0  | 1  | 2  | 1  | 0  | 1  | 1  | 2  | 1  | 0  | 2  | 1  | 2  | 1  | 2  | 2  | 0  | 0  | 0  | 0  |   |
| ENSP00000255882                            | ATP13A3   | 48  | 2  | 2  | 2  | 3  | 0  | 3  | 5  | 2  | 2  | 0  | 0  | 2  | 1  | 1  | 2  | 0  | 0  | 3  | 1  | 2  | 3  | 1  | 1  | 3  | 3  | 1  | 1  | 0  | 1  | 1  |   |
| ENSP00000256031                            | IPO8      | 16  | 0  | 2  | 0  | 2  | 2  | 2  | 2  | 0  | 0  | 0  | 0  | 0  | 0  | 0  | 1  | 2  | 0  | 1  | 0  | 0  | 0  | 0  | 0  | 0  | 1  | 0  | 1  | 0  | 0  | 0  |   |
| ENSP00000256079                            | SPIBK5    | 73  | 4  | 2  | 0  | 3  | 0  | 0  | 2  | 1  | 0  | 0  | 1  | 0  | 4  | 0  | 3  | 3  | 1  | 2  | 3  | 4  | 3  | 1  | 7  | 3  | 4  | 5  | 5  | 3  | 3  | 6  |   |
| ENSP00000256084,ENSP000000:ENSG00000133710 | IMPA1     | 85  | 4  | 1  | 2  | 2  | 2  | 1  | 2  | 2  | 3  | 0  | 2  | 1  | 3  | 1  | 1  | 4  | 5  | 3  | 4  | 1  | 3  | 1  | 4  | 3  | 3  | 5  | 2  | 6  | 9  | 5  |   |
| ENSP00000256151                            | CCDC59    | 27  | 1  | 0  | 1  | 1  | 0  | 1  | 0  | 1  | 1  | 1  | 0  | 0  | 1  | 1  | 0  | 1  | 1  | 2  | 1  | 1  | 1  | 2  | 2  | 1  | 1  | 0  | 0  | 2  | 2  | 1  |   |
| ENSP00000256183,ENSP000000:ENSG00000133805 | AMPD3     | 10  | 0  | 0  | 1  | 2  | 1  | 1  | 0  | 0  | 0  | 0  | 0  | 0  | 1  | 0  | 0  | 0  | 0  | 0  | 0  | 0  | 0  | 1  | 0  | 0  | 0  | 0  | 1  | 0  | 1  | 0  |   |
| ENSP00000256194                            | MICAL2    | 22  | 2  | 1  | 0  | 0  | 1  | 0  | 3  | 1  | 1  | 0  | 0  | 2  | 0  | 0  | 0  | 1  | 0  | 0  | 0  | 0  | 0  | 1  | 1  | 4  | 0  | 1  | 1  | 0  | 1  | 1  |   |
| ENSP00000256196                            | RRAS2     | 113 | 8  | 4  | 5  | 1  | 0  | 1  | 6  | 1  | 2  | 3  | 3  | 5  | 2  | 1  | 4  | 6  | 5  | 7  | 3  | 4  | 1  | 6  | 3  | 4  | 7  | 2  | 6  | 6  | 4  | 4  |   |
| ENSP00000256216                            | HSD17B4   | 358 | 15 | 8  | 9  | 14 | 14 | 21 | 16 | 12 | 14 | 3  | 10 | 4  | 9  | 5  | 8  | 9  | 8  | 8  | 10 | 9  | 14 | 14 | 19 | 19 | 24 | 26 | 23 | 5  | 6  | 2  |   |
| ENSP00000256246                            | TEX15     | 13  | 1  | 0  | 1  | 0  | 1  | 1  | 1  | 1  | 0  | 0  | 0  | 0  | 0  | 1  | 0  | 1  | 1  | 1  | 0  | 0  | 0  | 0  | 1  | 1  | 0  | 0  | 0  | 0  | 0  | 0  |   |
| ENSP00000256324,ENSP000000:ENSG00000133943 | C14orf159 | 55  | 1  | 2  | 0  | 0  | 0  | 0  | 0  | 0  | 1  | 0  | 0  | 1  | 0  | 1  | 0  | 4  | 6  | 5  | 1  | 0  | 0  | 2  | 5  | 4  | 7  | 9  | 3  | 2  | 0  | 1  |   |
| ENSP00000256366                            | SYNJ2BP   | 29  | 0  | 0  | 1  | 1  | 2  | 2  | 0  | 1  | 1  | 1  | 2  | 1  | 0  | 2  | 1  | 0  | 1  | 1  | 0  | 3  | 1  | 1  | 1  | 1  | 0  | 1  | 1  | 1  | 1  | 1  |   |
| ENSP00000256379                            | MED6      | 17  | 0  | 0  | 1  | 1  | 0  | 0  | 1  | 1  | 0  | 0  | 0  | 1  | 1  | 2  | 1  | 1  | 1  | 1  | 2  | 1  | 0  | 1  | 0  | 0  | 0  | 0  | 1  | 1  | 0  | 0  |   |
| ENSP00000256383                            | EIF2S1    | 398 | 15 | 13 | 11 | 9  | 16 | 12 | 9  | 8  | 12 | 9  | 21 | 10 | 10 | 11 | 12 | 19 | 13 | 16 | 13 | 15 | 18 | 14 | 17 | 8  | 14 | 15 | 10 | 14 | 18 | 16 |   |
| ENSP00000256398                            | ELP3      | 28  | 3  | 0  | 0  | 0  | 1  | 1  | 0  | 0  | 0  | 0  | 0  | 1  | 2  | 0  | 2  | 3  | 1  | 1  | 1  | 0  | 1  | 0  | 0  | 1  | 2  | 1  | 1  | 2  | 2  | 2  |   |
| ENSP00000256429                            | MBD2      | 64  | 0  | 0  | 1  | 2  | 2  | 4  | 2  | 1  | 3  | 2  | 4  | 1  | 2  | 2  | 3  | 3  | 2  | 2  | 2  | 3  | 2  | 1  | 0  | 3  | 3  | 4  | 3  | 2  | 2  | 3  |   |
| ENSP00000256433                            | IER3IP1   | 15  | 1  | 1  | 0  | 0  | 0  | 0  | 0  | 0  | 1  | 0  | 2  | 0  | 0  | 1  | 0  | 1  | 0  | 0  | 0  | 0  | 2  | 0  | 1  | 1  | 0  | 2  | 1  | 0  | 1  | 0  |   |
| ENSP00000256442,ENSP000000:ENSG00000134057 | CENB1     | 12  | 1  | 2  | 1  | 1  | 0  | 0  | 0  | 0  | 0  | 0  | 0  | 0  | 0  | 0  | 1  | 0  | 0  | 1  | 0  | 0  | 1  | 0  | 0  | 0  | 0  | 1  | 0  | 0  | 1  | 1  |   |
| ENSP00000256443                            | CDK7      | 71  | 3  | 4  | 3  | 2  | 2  | 3  | 1  | 1  | 1  | 1  | 5  | 1  | 1  | 2  | 4  | 2  | 2  | 2  | 2  | 3  | 2  | 1  | 3  | 1  | 1  | 1  | 4  | 7  | 4  | 4  |   |
| ENSP00000256496                            | ARL8B     | 77  | 6  | 2  | 2  | 1  | 3  | 3  | 2  | 2  | 0  | 1  | 5  | 2  | 2  | 3  | 2  | 2  | 4  | 1  | 4  | 3  | 0  | 1  | 5  | 2  | 5  | 3  | 3  | 4  | 2  | 2  |   |
| ENSP00000256544                            | C15orf29  | 13  | 0  | 0  | 0  | 0  | 1  | 1  | 2  | 0  | 0  | 0  | 0  | 0  | 0  | 0  | 1  | 1  | 1  | 0  | 0  | 1  | 1  | 0  | 0  | 0  | 1  | 0  | 0  | 1  | 1  | 0  |   |
| ENSP00000256545                            | C15orf24  | 48  | 4  | 2  | 1  | 5  | 3  | 3  | 4  | 0  | 2  | 0  | 1  | 3  | 0  | 1  | 2  | 0  | 0  | 1  | 4  | 2  | 2  | 1  | 0  | 0  | 1  | 2  | 1  | 1  | 0  | 2  |   |
| ENSP00000256594,ENSP000000:ENSG00000134202 | GSTM3     | 94  | 4  | 2  | 1  | 0  | 0  | 0  | 0  | 0  | 0  | 0  | 0  | 0  | 10 | 2  | 12 | 2  | 0  | 1  | 10 | 11 | 10 | 0  | 2  | 0  | 2  | 6  | 1  | 6  | 8  | 4  |   |
| ENSP00000256637                            | SORT1     | 24  | 2  | 1  | 2  | 2  | 0  | 0  | 2  | 0  | 1  | 0  | 2  | 2  | 1  | 0  | 0  | 0  | 1  | 4  | 2  | 1  | 0  | 0  | 0  | 0  | 0  | 0  | 0  | 0  | 0  | 0  |   |
| ENSP00000256646                            | NOTCH2    | 26  | 1  | 0  | 0  | 1  | 0  | 0  | 0  | 0  | 0  | 1  | 0  | 1  | 1  | 2  | 0  | 0  | 0  | 0  | 2  | 4  | 5  | 1  | 0  | 0  | 1  | 0  | 0  | 2  | 2  | 2  |   |
| ENSP00000256680                            | FKBP11    | 83  | 5  | 8  | 3  | 2  | 1  | 1  | 1  | 1  | 3  | 2  | 7  | 1  | 1  | 1  | 1  | 0  | 0  | 0  | 1  | 2  | 2  | 4  | 8  | 6  | 2  | 1  | 0  | 6  | 5  | 8  |   |
| ENSP00000256689                            | SLC38A2   | 21  | 1  | 2  | 0  | 0  | 0  | 1  | 0  | 0  | 1  | 0  | 1  | 0  | 1  | 0  | 1  | 2  | 0  | 2  | 0  | 0  | 1  | 0  | 1  | 1  | 1  | 1  | 0  | 1  | 0  | 3  |   |
| ENSP00000256707                            | KIDINS22C | 15  | 2  | 1  | 2  | 0  | 0  | 0  | 0  | 0  | 0  | 1  | 0  | 0  | 2  | 0  | 2  | 1  | 0  | 0  | 1  | 0  | 0  | 0  | 0  | 0  | 0  | 0  | 2  | 1  | 0  | 0  | 0 |
| ENSP00000256854                            |           |     |    |    |    |    |    |    |    |    |    |    |    |    |    |    |    |    |    |    |    |    |    |    |    |    |    |    |    |    |    |    |   |

|                                 |                 |          |      |    |    |    |    |    |    |    |    |    |    |    |    |    |    |    |    |    |    |    |     |    |    |    |    |    |    |    |    |    |    |
|---------------------------------|-----------------|----------|------|----|----|----|----|----|----|----|----|----|----|----|----|----|----|----|----|----|----|----|-----|----|----|----|----|----|----|----|----|----|----|
| ENSP00000258455                 | ENSG00000135972 | MRPS9    | 141  | 8  | 2  | 1  | 5  | 6  | 6  | 6  | 2  | 5  | 0  | 5  | 6  | 6  | 0  | 5  | 5  | 10 | 3  | 5  | 5   | 5  | 0  | 7  | 5  | 6  | 4  | 5  | 7  | 5  | 6  |
| ENSP00000258494                 | ENSG00000136010 | ALDH1L2  | 59   | 0  | 0  | 0  | 0  | 0  | 0  | 0  | 0  | 0  | 0  | 0  | 0  | 0  | 0  | 0  | 0  | 0  | 0  | 0  | 0   | 0  | 14 | 23 | 16 | 1  | 3  | 2  | 0  | 0  | 0  |
| ENSP00000258512                 | ENSG00000136026 | CKAP4    | 758  | 36 | 28 | 31 | 24 | 49 | 32 | 19 | 16 | 14 | 7  | 11 | 10 | 33 | 23 | 32 | 17 | 36 | 28 | 31 | 43  | 24 | 28 | 38 | 23 | 32 | 30 | 16 | 15 | 22 | 10 |
| ENSP00000258530                 | ENSG00000136044 | APPL2    | 19   | 0  | 1  | 2  | 0  | 0  | 0  | 3  | 1  | 1  | 0  | 0  | 0  | 1  | 0  | 0  | 0  | 0  | 1  | 1  | 0   | 0  | 3  | 1  | 2  | 0  | 1  | 0  | 0  | 0  | 1  |
| ENSP00000258531                 | ENSG00000136045 | PWP1     | 28   | 4  | 0  | 0  | 0  | 0  | 1  | 0  | 0  | 2  | 0  | 2  | 1  | 0  | 0  | 0  | 0  | 0  | 0  | 1  | 0   | 1  | 0  | 3  | 0  | 1  | 2  | 2  | 1  | 4  | 3  |
| ENSP00000258597                 | ENSG00000136098 | NEK3     | 12   | 1  | 0  | 1  | 0  | 1  | 1  | 1  | 1  | 0  | 0  | 0  | 0  | 0  | 0  | 0  | 0  | 0  | 1  | 0  | 0   | 0  | 0  | 0  | 0  | 0  | 1  | 2  | 1  | 1  | 1  |
| ENSP00000258607,ENSP00000136108 | ENSG00000136108 | CKAP2    | 29   | 1  | 2  | 1  | 2  | 0  | 0  | 1  | 0  | 2  | 0  | 1  | 2  | 0  | 1  | 1  | 0  | 0  | 3  | 1  | 2   | 1  | 0  | 1  | 0  | 0  | 0  | 1  | 1  | 3  | 2  |
| ENSP00000258648                 | ENSG00000136146 | MED4     | 63   | 3  | 2  | 3  | 3  | 3  | 1  | 3  | 1  | 1  | 1  | 1  | 1  | 0  | 1  | 3  | 2  | 4  | 4  | 4  | 1   | 2  | 1  | 5  | 2  | 3  | 0  | 1  | 3  | 2  | 2  |
| ENSP00000258654                 | ENSG00000136152 | COG3     | 77   | 1  | 1  | 1  | 6  | 9  | 14 | 6  | 3  | 2  | 0  | 3  | 0  | 2  | 0  | 1  | 1  | 2  | 2  | 1  | 0   | 3  | 0  | 1  | 2  | 3  | 6  | 2  | 1  | 1  | 3  |
| ENSP00000258729                 | ENSG00000136231 | IGF2BP3  | 153  | 16 | 13 | 11 | 2  | 2  | 2  | 6  | 6  | 8  | 1  | 6  | 2  | 1  | 1  | 3  | 3  | 3  | 5  | 3  | 6   | 7  | 2  | 5  | 5  | 6  | 6  | 6  | 5  | 6  | 5  |
| ENSP00000258742                 | ENSG00000136243 | NUPL2    | 11   | 1  | 0  | 0  | 1  | 0  | 1  | 0  | 0  | 1  | 0  | 0  | 0  | 1  | 0  | 0  | 2  | 0  | 0  | 0  | 1   | 0  | 0  | 0  | 1  | 0  | 1  | 0  | 0  | 0  | 1  |
| ENSP00000258761                 | ENSG00000136261 | BZW2     | 145  | 9  | 8  | 4  | 3  | 4  | 2  | 7  | 5  | 8  | 2  | 5  | 0  | 6  | 3  | 6  | 1  | 3  | 4  | 5  | 6   | 6  | 2  | 8  | 2  | 5  | 7  | 4  | 4  | 11 | 5  |
| ENSP00000258770,ENSP00000136270 | ENSG00000136270 | TBRG4    | 97   | 3  | 4  | 4  | 1  | 3  | 2  | 2  | 3  | 4  | 2  | 4  | 4  | 0  | 1  | 3  | 3  | 3  | 4  | 2  | 4   | 4  | 6  | 8  | 4  | 1  | 5  | 2  | 4  | 2  | 5  |
| ENSP00000258772                 | ENSG00000136271 | DDX56    | 140  | 7  | 4  | 3  | 6  | 2  | 3  | 5  | 6  | 3  | 5  | 8  | 7  | 3  | 4  | 3  | 1  | 4  | 3  | 7  | 3   | 4  | 6  | 9  | 7  | 4  | 3  | 3  | 6  | 8  | 3  |
| ENSP00000258780                 | ENSG00000136279 | DBNL     | 149  | 6  | 5  | 8  | 3  | 6  | 6  | 5  | 3  | 6  | 3  | 4  | 3  | 2  | 7  | 7  | 3  | 1  | 2  | 4  | 12  | 3  | 6  | 11 | 2  | 5  | 5  | 3  | 4  | 7  | 7  |
| ENSP00000258796,ENSP00000136295 | ENSG00000136295 | TTYH3    | 12   | 0  | 1  | 0  | 0  | 0  | 1  | 0  | 1  | 2  | 0  | 3  | 1  | 0  | 0  | 0  | 0  | 0  | 0  | 0  | 0   | 1  | 0  | 0  | 0  | 0  | 0  | 0  | 0  | 0  | 2  |
| ENSP00000258874                 | ENSG00000136371 | MTHFS    | 50   | 0  | 1  | 1  | 2  | 2  | 2  | 5  | 2  | 1  | 2  | 2  | 2  | 1  | 4  | 2  | 2  | 1  | 3  | 3  | 1   | 2  | 2  | 0  | 1  | 1  | 0  | 0  | 1  | 3  | 1  |
| ENSP00000258884                 | ENSG00000136379 | FAM108C1 | 14   | 0  | 0  | 0  | 0  | 0  | 2  | 1  | 1  | 0  | 0  | 0  | 0  | 0  | 0  | 0  | 0  | 0  | 0  | 0  | 1   | 0  | 1  | 2  | 1  | 4  | 0  | 1  | 0  | 0  | 0  |
| ENSP00000258886                 | ENSG00000136381 | IREB2    | 15   | 3  | 1  | 0  | 3  | 0  | 0  | 2  | 1  | 0  | 0  | 0  | 0  | 0  | 1  | 0  | 0  | 0  | 0  | 1  | 2   | 0  | 0  | 0  | 0  | 0  | 1  | 0  | 0  | 0  | 0  |
| ENSP00000258947                 | ENSG00000136436 | CALCOCO  | 22   | 3  | 0  | 2  | 1  | 0  | 1  | 0  | 0  | 1  | 0  | 0  | 0  | 2  | 1  | 0  | 4  | 0  | 1  | 1  | 2   | 0  | 0  | 0  | 0  | 1  | 0  | 1  | 1  | 0  | 0  |
| ENSP00000258960                 | ENSG00000136448 | NMT1     | 83   | 3  | 3  | 1  | 3  | 3  | 3  | 0  | 2  | 2  | 2  | 3  | 1  | 1  | 7  | 2  | 2  | 0  | 4  | 2  | 2   | 7  | 2  | 3  | 1  | 3  | 5  | 3  | 4  | 5  | 4  |
| ENSP00000258962                 | ENSG00000136450 | SFRS1    | 712  | 17 | 18 | 27 | 19 | 33 | 15 | 27 | 26 | 17 | 32 | 27 | 18 | 22 | 29 | 20 | 15 | 42 | 18 | 21 | 30  | 17 | 33 | 29 | 25 | 30 | 19 | 16 | 26 | 25 | 19 |
| ENSP00000258975                 | ENSG00000136463 | TACO1    | 61   | 3  | 2  | 1  | 3  | 1  | 3  | 0  | 0  | 2  | 0  | 7  | 2  | 2  | 1  | 2  | 3  | 0  | 3  | 2  | 0   | 4  | 0  | 2  | 2  | 1  | 6  | 2  | 0  | 4  | 3  |
| ENSP00000259034                 | ENSG00000136518 | ACTL6A   | 227  | 12 | 5  | 7  | 10 | 11 | 9  | 7  | 2  | 8  | 3  | 10 | 7  | 10 | 4  | 7  | 5  | 6  | 5  | 13 | 11  | 7  | 6  | 10 | 7  | 11 | 9  | 5  | 10 | 3  | 7  |
| ENSP00000259037                 | ENSG00000136521 | NDUFB5   | 43   | 1  | 1  | 3  | 2  | 1  | 1  | 1  | 1  | 2  | 2  | 2  | 1  | 0  | 0  | 1  | 1  | 1  | 2  | 1  | 2   | 1  | 1  | 3  | 2  | 0  | 1  | 2  | 0  | 4  | 1  |
| ENSP00000259038                 | ENSG00000136522 | MRPL47   | 104  | 2  | 2  | 4  | 4  | 7  | 5  | 3  | 2  | 3  | 5  | 3  | 2  | 3  | 3  | 3  | 2  | 6  | 4  | 2  | 4   | 2  | 5  | 3  | 3  | 7  | 3  | 4  | 3  | 2  | 0  |
| ENSP00000259056                 | ENSG00000136542 | GALNT5   | 44   | 0  | 0  | 0  | 4  | 4  | 5  | 0  | 0  | 0  | 0  | 0  | 0  | 1  | 0  | 1  | 0  | 0  | 1  | 3  | 1   | 0  | 4  | 5  | 3  | 2  | 5  | 5  | 0  | 0  | 0  |
| ENSP00000259154                 | ENSG00000136636 | KCTD3    | 16   | 0  | 0  | 0  | 4  | 1  | 1  | 1  | 0  | 1  | 0  | 1  | 0  | 1  | 0  | 0  | 0  | 0  | 0  | 1  | 0   | 0  | 1  | 1  | 0  | 1  | 0  | 0  | 0  | 1  | 1  |
| ENSP00000259229                 | ENSG00000136710 | CCDC115  | 23   | 3  | 2  | 1  | 1  | 1  | 1  | 0  | 1  | 0  | 1  | 0  | 1  | 0  | 1  | 0  | 0  | 1  | 2  | 1  | 1   | 0  | 1  | 1  | 0  | 0  | 0  | 0  | 1  | 1  | 1  |
| ENSP00000259235                 | ENSG00000136715 | SAP130   | 14   | 2  | 0  | 0  | 1  | 1  | 0  | 0  | 0  | 1  | 1  | 0  | 2  | 0  | 0  | 0  | 0  | 1  | 0  | 0  | 1   | 0  | 0  | 0  | 0  | 2  | 0  | 1  | 0  | 0  | 1  |
| ENSP00000259239                 | ENSG00000136718 | IMP4     | 62   | 3  | 1  | 0  | 0  | 1  | 0  | 2  | 2  | 2  | 0  | 5  | 3  | 2  | 1  | 3  | 2  | 2  | 3  | 3  | 3   | 2  | 0  | 4  | 0  | 1  | 4  | 3  | 1  | 7  | 2  |
| ENSP00000259339                 | ENSG00000136816 | TOR1B    | 53   | 2  | 1  | 2  | 1  | 3  | 2  | 5  | 2  | 2  | 1  | 1  | 1  | 2  | 1  | 2  | 0  | 1  | 2  | 2  | 3   | 1  | 2  | 0  | 0  | 0  | 0  | 0  | 6  | 4  | 4  |
| ENSP00000259400                 | ENSG00000136874 | STX17    | 24   | 1  | 0  | 0  | 0  | 1  | 1  | 0  | 1  | 2  | 0  | 1  | 0  | 3  | 0  | 2  | 0  | 2  | 0  | 2  | 1   | 1  | 0  | 1  | 0  | 0  | 0  | 1  | 0  | 2  | 2  |
| ENSP00000259406,ENSP00000138835 | ENSG00000138835 | RG33     | 10   | 2  | 1  | 1  | 0  | 0  | 0  | 2  | 0  | 0  | 0  | 0  | 0  | 0  | 0  | 0  | 0  | 2  | 0  | 0  | 0   | 0  | 0  | 1  | 0  | 0  | 0  | 0  | 0  | 1  | 0  |
| ENSP00000259457                 | ENSG00000136930 | PSMB7    | 251  | 12 | 9  | 5  | 11 | 7  | 12 | 9  | 3  | 5  | 3  | 11 | 8  | 6  | 4  | 10 | 5  | 7  | 11 | 11 | 11  | 13 | 4  | 9  | 8  | 2  | 15 | 11 | 8  | 9  | 12 |
| ENSP00000259469,ENSP00000136942 | ENSG00000136942 | RPL35    | 173  | 7  | 5  | 10 | 2  | 10 | 4  | 3  | 5  | 5  | 7  | 7  | 2  | 6  | 7  | 6  | 5  | 3  | 5  | 3  | 10  | 6  | 6  | 6  | 4  | 6  | 6  | 3  | 9  | 9  | 6  |
| ENSP00000259569                 | ENSG00000137040 | RANBP6   | 140  | 6  | 6  | 8  | 6  | 6  | 5  | 6  | 3  | 4  | 1  | 3  | 4  | 6  | 3  | 4  | 4  | 5  | 4  | 8  | 5   | 2  | 2  | 4  | 4  | 8  | 5  | 3  | 5  | 7  | 3  |
| ENSP00000259667                 | ENSG00000137133 | HINT2    | 107  | 5  | 3  | 4  | 3  | 5  | 5  | 3  | 3  | 3  | 4  | 4  | 5  | 3  | 3  | 4  | 1  | 3  | 5  | 3  | 2   | 7  | 1  | 3  | 4  | 4  | 6  | 6  | 1  | 2  | 2  |
| ENSP00000259737,ENSP00000137207 | ENSG00000137207 | YIPF3    | 10   | 0  | 0  | 0  | 1  | 0  | 0  | 1  | 1  | 2  | 0  | 0  | 0  | 0  | 0  | 0  | 0  | 0  | 0  | 1  | 0   | 0  | 0  | 0  | 1  | 0  | 0  | 1  | 1  | 1  | 0  |
| ENSP00000259791,ENSP00000138128 | ENSG00000138128 | HIST3H2A | 314  | 5  | 10 | 5  | 0  | 2  | 7  | 1  | 5  | 10 | 51 | 5  | 5  | 7  | 15 | 3  | 1  | 5  | 0  | 11 | 12  | 11 | 21 | 14 | 9  | 18 | 10 | 9  | 36 | 16 | 16 |
| ENSP00000259808,ENSP00000137275 | ENSG00000137275 | RIPK1    | 47   | 0  | 1  | 0  | 3  | 1  | 2  | 3  | 0  | 1  | 0  | 0  | 1  | 1  | 0  | 0  | 2  | 3  | 2  | 3  | 2   | 0  | 0  | 1  | 0  | 3  | 3  | 1  | 3  | 4  | 0  |
| ENSP00000259818                 | ENSG00000137285 | TUBB2B   | 1306 | 62 | 47 | 63 | 34 | 60 | 46 | 37 | 8  | 26 | 16 | 48 | 29 | 41 | 43 | 33 | 47 | 67 | 44 | 40 | 89  | 35 | 22 | 36 | 21 | 57 | 48 | 49 | 44 | 69 | 45 |
| ENSP00000259925,ENSP00000139630 | ENSG00000139630 | TUBB     | 1646 | 66 | 50 | 70 | 42 | 87 | 56 | 50 | 16 | 36 | 18 | 53 | 31 | 54 | 57 | 45 | 58 | 80 | 53 | 57 | 112 | 52 | 30 | 44 | 27 | 78 | 60 | 62 | 59 | 89 | 54 |
| ENSP00000260054                 | ENSG00000137500 | CCDC90B  | 18   | 0  | 0  | 0  | 1  | 0  | 1  | 3  | 0  | 0  | 0  | 0  | 3  | 1  | 0  | 0  | 0  | 2  | 1  | 0  | 1   | 1  | 0  | 0  | 2  | 1  | 0  | 0  | 0  | 1  | 0  |
| ENSP00000260102                 | ENSG00000137547 | MRPL15   | 99   | 2  | 3  | 1  | 4  | 0  | 2  | 2  | 3  | 3  | 2  | 6  | 6  | 3  | 0  | 2  | 2  | 9  | 5  | 1  | 2   | 1  | 1  | 4  | 6  | 9  | 3  | 3  | 3  | 7  | 4  |
| ENSP00000260118                 | ENSG00000137563 | GGH      | 148  | 10 | 7  | 1  | 4  | 4  | 7  | 5  | 1  | 0  | 1  | 1  | 13 | 5  | 6  | 1  | 8  | 4  | 9  | 3  | 5   | 5  | 4  | 1  | 4  | 4  | 11 | 8  | 8  | 4  | 3  |
| ENSP00000260129                 | ENSG00000137574 | TGS1     | 18   | 0  | 0  | 0  | 0  | 1  | 2  | 0  | 1  | 0  | 0  | 0  | 0  | 1  | 0  | 0  | 0  | 0  | 0  | 0  | 1   | 1  | 0  | 0  | 1  | 0  | 0  | 0  | 4  | 5  | 1  |
| ENSP00000260130                 | ENSG00000137575 | SDCBP    | 10   | 0  | 2  | 2  | 0  | 0  | 0  | 1  | 0  | 0  | 0  | 0  | 0  | 0  | 1  | 0  | 0  | 0  | 0  | 0  | 0   | 0  | 0  | 1  | 0  | 1  | 0  | 0  | 0  | 1  | 1  |
| ENSP00000260147                 | ENSG00000083857 | FAT1     | 271  | 1  | 0  | 2  | 11 | 1  | 1  | 19 | 7  | 11 | 1  | 0  | 1  | 17 | 19 | 24 | 3  | 3  | 8  | 24 | 29  | 19 | 9  | 16 | 17 | 9  | 10 | 8  | 0  | 1  | 0  |
| ENSP00000260184,ENSP00000137628 | ENSG00000137628 | DDX60    | 27   | 0  | 0  | 0  | 2  | 1  | 0  | 13 | 7  | 2  | 0  | 0  | 0  | 0  | 0  | 0  | 0  | 0  | 0  | 0  | 0   | 0  | 2  | 0  | 0  | 0  | 0  | 0  | 0  | 0  | 0  |
| ENSP00000260188                 | ENSG00000048028 | USP28    | 32   | 4  | 1  | 0  | 0  | 0  | 1  | 1  | 0  | 1  | 1  | 2  | 1  | 2  | 0  | 0  | 1  | 0  | 1  | 0  | 2   | 2  | 0  | 1  | 0  | 2  | 2  | 1  | 1  | 2  | 3  |
| ENSP00000260197                 |                 |          |      |    |    |    |    |    |    |    |    |    |    |    |    |    |    |    |    |    |    |    |     |    |    |    |    |    |    |    |    |    |    |

|                                 |                 |          |      |    |    |    |    |    |    |    |    |    |    |    |    |    |    |    |    |    |    |    |    |    |    |    |    |    |    |    |    |    |    |
|---------------------------------|-----------------|----------|------|----|----|----|----|----|----|----|----|----|----|----|----|----|----|----|----|----|----|----|----|----|----|----|----|----|----|----|----|----|----|
| ENSP00000261366                 | ENSG00000113368 | LWNB1    | 1198 | 40 | 31 | 29 | 39 | 52 | 41 | 3  | 45 | 39 | 39 | 48 | 40 | 30 | 37 | 35 | 25 | 40 | 32 | 52 | 51 | 39 | 55 | 62 | 50 | 42 | 46 | 35 | 30 | 28 | 29 |
| ENSP00000261383                 | ENSG00000158486 | DNAH3    | 12   | 0  | 0  | 1  | 1  | 1  | 1  | 0  | 0  | 0  | 0  | 1  | 0  | 0  | 0  | 1  | 0  | 0  | 0  | 1  | 0  | 0  | 0  | 1  | 1  | 0  | 0  | 1  | 0  | 0  | 1  |
| ENSP00000261396                 | ENSG00000069248 | NUP133   | 172  | 4  | 8  | 4  | 3  | 4  | 4  | 5  | 2  | 6  | 1  | 9  | 5  | 4  | 3  | 5  | 6  | 6  | 9  | 3  | 6  | 7  | 10 | 9  | 7  | 8  | 7  | 6  | 6  | 9  | 0  |
| ENSP00000261401                 | ENSG00000110880 | CORO1C   | 122  | 4  | 4  | 4  | 3  | 3  | 2  | 3  | 4  | 3  | 3  | 4  | 3  | 2  | 7  | 3  | 0  | 0  | 2  | 4  | 6  | 4  | 6  | 10 | 1  | 1  | 6  | 3  | 7  | 10 | 10 |
| ENSP00000261406                 | ENSG00000126749 | EMG1     | 70   | 4  | 3  | 3  | 0  | 1  | 2  | 1  | 1  | 1  | 1  | 6  | 2  | 0  | 1  | 1  | 2  | 1  | 4  | 1  | 2  | 5  | 1  | 3  | 3  | 3  | 3  | 3  | 2  | 6  | 4  |
| ENSP00000261407                 | ENSG00000111684 | U47924.1 | 23   | 5  | 3  | 0  | 0  | 1  | 0  | 1  | 1  | 0  | 1  | 0  | 2  | 0  | 2  | 0  | 0  | 1  | 0  | 0  | 1  | 0  | 1  | 0  | 1  | 0  | 0  | 1  | 1  | 0  | 1  |
| ENSP00000261413                 | ENSG00000113048 | MRPS27   | 210  | 13 | 4  | 10 | 5  | 9  | 9  | 6  | 6  | 6  | 4  | 7  | 4  | 3  | 2  | 6  | 3  | 8  | 5  | 8  | 5  | 6  | 8  | 17 | 6  | 8  | 12 | 5  | 11 | 6  | 8  |
| ENSP00000261416                 | ENSG00000049860 | HEXB     | 181  | 7  | 6  | 2  | 6  | 12 | 8  | 6  | 6  | 5  | 3  | 7  | 7  | 2  | 4  | 6  | 5  | 6  | 6  | 7  | 6  | 7  | 9  | 5  | 10 | 12 | 4  | 4  | 5  | 2  |    |
| ENSP00000261427                 | ENSG00000078140 | UBE2K    | 155  | 9  | 4  | 5  | 7  | 7  | 4  | 5  | 3  | 5  | 0  | 6  | 2  | 8  | 2  | 4  | 7  | 7  | 4  | 9  | 10 | 2  | 1  | 6  | 2  | 8  | 7  | 4  | 4  | 9  | 4  |
| ENSP00000261439                 | ENSG00000065882 | TBC1D1   | 10   | 0  | 0  | 0  | 1  | 1  | 0  | 1  | 0  | 0  | 0  | 0  | 0  | 0  | 1  | 0  | 0  | 2  | 0  | 1  | 1  | 0  | 1  | 0  | 0  | 0  | 0  | 0  | 1  | 0  | 0  |
| ENSP00000261461                 | ENSG00000066027 | PPP2R5A  | 467  | 3  | 2  | 2  | 2  | 4  | 4  | 1  | 0  | 3  | 1  | 0  | 0  | 0  | 0  | 2  | 1  | 0  | 1  | 2  | 2  | 1  | 0  | 0  | 0  | 2  | 4  | 5  | 1  | 1  | 2  |
| ENSP00000261479                 | ENSG00000100902 | PSMA6    | 406  | 18 | 13 | 6  | 9  | 9  | 17 | 18 | 1  | 12 | 2  | 13 | 10 | 14 | 4  | 12 | 19 | 11 | 15 | 25 | 10 | 21 | 5  | 16 | 17 | 18 | 30 | 12 | 7  | 27 | 16 |
| ENSP00000261483                 | ENSG00000112893 | MAN2A1   | 104  | 8  | 3  | 3  | 9  | 11 | 5  | 8  | 5  | 1  | 0  | 2  | 3  | 2  | 0  | 0  | 4  | 3  | 1  | 7  | 5  | 1  | 1  | 3  | 6  | 5  | 4  | 1  | 1  | 1  | 1  |
| ENSP00000261489                 | ENSG00000102804 | TSC22D1  | 40   | 3  | 2  | 2  | 3  | 2  | 3  | 2  | 0  | 2  | 0  | 1  | 1  | 2  | 2  | 0  | 1  | 1  | 3  | 3  | 1  | 0  | 3  | 0  | 0  | 1  | 1  | 0  | 0  | 1  | 1  |
| ENSP00000261491,ENSP00000102780 | ENSG00000102780 | DGKH     | 12   | 2  | 0  | 0  | 2  | 0  | 1  | 0  | 0  | 1  | 0  | 0  | 0  | 0  | 0  | 1  | 0  | 0  | 1  | 0  | 0  | 1  | 0  | 0  | 0  | 0  | 1  | 0  | 1  | 0  | 0  |
| ENSP00000261497                 | ENSG00000124422 | USP22    | 11   | 1  | 0  | 1  | 0  | 0  | 0  | 1  | 0  | 0  | 0  | 0  | 0  | 0  | 1  | 1  | 0  | 0  | 1  | 0  | 1  | 0  | 1  | 0  | 0  | 0  | 0  | 0  | 1  | 1  | 1  |
| ENSP00000261507                 | ENSG00000052802 | SC4MOL   | 20   | 2  | 1  | 0  | 1  | 1  | 1  | 1  | 0  | 0  | 0  | 0  | 0  | 1  | 1  | 0  | 2  | 1  | 0  | 1  | 1  | 2  | 0  | 0  | 0  | 0  | 1  | 1  | 0  | 1  | 1  |
|                                 |                 |          |      |    |    |    |    |    |    |    |    |    |    |    |    |    |    |    |    |    |    |    |    |    |    |    |    |    |    |    |    |    |    |

|                                  |                  |          |      |    |    |    |    |    |    |     |     |     |    |    |    |    |    |    |    |    |    |    |    |    |    |    |    |    |    |    |    |    |    |    |
|----------------------------------|------------------|----------|------|----|----|----|----|----|----|-----|-----|-----|----|----|----|----|----|----|----|----|----|----|----|----|----|----|----|----|----|----|----|----|----|----|
| ENSP00000262241                  | ENSG000000089902 | RCOR1    | 148  | 7  | 3  | 5  | 4  | 5  | 5  | 2   | 3   | 3   | 3  | 5  | 8  | 5  | 8  | 5  | 5  | 5  | 2  | 8  | 9  | 3  | 7  | 4  | 5  | 8  | 5  | 2  | 3  | 6  | 5  |    |
| ENSP00000262265                  | ENSG00000104872  | PIH1D1   | 74   | 5  | 2  | 2  | 1  | 2  | 1  | 3   | 1   | 3   | 3  | 1  | 0  | 2  | 5  | 2  | 2  | 2  | 2  | 3  | 5  | 3  | 3  | 5  | 2  | 1  | 4  | 1  | 3  | 3  | 2  |    |
| ENSP00000262269                  | ENSG00000105357  | MYH14    | 1705 | 67 | 46 | 57 | 58 | 96 | 74 | 152 | 147 | 148 | 10 | 20 | 5  | 26 | 24 | 23 | 38 | 49 | 32 | 54 | 63 | 48 | 67 | 80 | 53 | 80 | 90 | 49 | 17 | 18 | 14 |    |
| ENSP00000262315                  | ENSG000001027586 | CHTF18   | 37   | 0  | 0  | 1  | 2  | 3  | 1  | 4   | 1   | 0   | 1  | 2  | 1  | 0  | 1  | 1  | 3  | 1  | 4  | 0  | 0  | 1  | 2  | 0  | 2  | 1  | 1  | 1  | 2  | 0  | 1  |    |
| ENSP00000262319                  | ENSG00000100726  | TELO2    | 51   | 5  | 3  | 0  | 1  | 2  | 1  | 0   | 0   | 0   | 0  | 0  | 1  | 2  | 1  | 3  | 2  | 1  | 3  | 2  | 2  | 4  | 0  | 2  | 0  | 1  | 3  | 0  | 2  | 4  | 0  |    |
| ENSP00000262352                  | ENSG00000106688  | SLC1A1   | 14   | 3  | 2  | 0  | 0  | 0  | 0  | 1   | 0   | 3   | 0  | 0  | 0  | 0  | 0  | 0  | 1  | 0  | 0  | 0  | 0  | 0  | 1  | 0  | 1  | 0  | 0  | 1  | 1  | 0  | 0  | 0  |
| ENSP00000262367,ENSP00000105339  | ENSG000000005339 | CREBBP   | 17   | 0  | 0  | 0  | 1  | 1  | 0  | 1   | 1   | 1   | 1  | 0  | 1  | 0  | 0  | 0  | 0  | 2  | 0  | 1  | 1  | 1  | 1  | 2  | 0  | 1  | 0  | 1  | 0  | 1  | 0  | 1  |
| ENSP00000262375                  | ENSG00000103423  | DNAJA3   | 168  | 5  | 6  | 5  | 4  | 7  | 6  | 5   | 4   | 4   | 2  | 8  | 2  | 6  | 4  | 6  | 6  | 4  | 6  | 6  | 6  | 6  | 7  | 6  | 8  | 7  | 9  | 4  | 5  | 9  | 5  |    |
| ENSP00000262384                  | ENSG00000102921  | N4BP1    | 10   | 1  | 1  | 4  | 0  | 0  | 1  | 0   | 0   | 1   | 0  | 0  | 0  | 0  | 0  | 2  | 0  | 0  | 0  | 0  | 0  | 0  | 0  | 0  | 0  | 0  | 0  | 0  | 0  | 0  | 0  | 0  |
| ENSP00000262414                  | ENSG00000108883  | EFTUD2   | 544  | 24 | 19 | 11 | 6  | 8  | 16 | 11  | 5   | 21  | 7  | 33 | 21 | 16 | 8  | 23 | 19 | 11 | 21 | 12 | 19 | 27 | 14 | 28 | 25 | 14 | 25 | 21 | 17 | 38 | 24 | 0  |
| ENSP00000262415                  | ENSG000000067596 | DHX8     | 54   | 4  | 5  | 3  | 1  | 2  | 2  | 5   | 0   | 1   | 0  | 4  | 2  | 1  | 1  | 3  | 1  | 0  | 0  | 3  | 1  | 3  | 2  | 2  | 3  | 0  | 1  | 0  | 1  | 1  | 2  |    |
| ENSP00000262428                  | ENSG00000103187  | COTL1    | 104  | 9  | 9  | 4  | 3  | 5  | 4  | 0   | 0   | 1   | 0  | 6  | 3  | 3  | 1  | 3  | 7  | 7  | 8  | 1  | 3  | 4  | 0  | 1  | 1  | 1  | 1  | 2  | 3  | 9  | 5  |    |
| ENSP00000262430                  | ENSG00000103150  | MLYCD    | 34   | 0  | 2  | 1  | 3  | 2  | 3  | 3   | 0   | 1   | 0  | 1  | 1  | 1  | 0  | 1  | 0  | 0  | 1  | 2  | 0  | 1  | 0  | 1  | 0  | 3  | 2  | 3  | 0  | 2  | 0  |    |
| ENSP00000262436,ENSP00000108510  | ENSG00000108510  | MED13    | 20   | 1  | 1  | 2  | 1  | 0  | 0  | 0   | 0   | 1   | 2  | 1  | 0  | 0  | 0  | 1  | 0  | 1  | 1  | 2  | 0  | 0  | 0  | 3  | 1  | 0  | 0  | 0  | 1  | 0  | 1  | 0  |
| ENSP00000262445                  | ENSG000000065559 | MAP2K4   | 17   | 0  | 2  | 0  | 0  | 0  | 2  | 0   | 0   | 0   | 0  | 1  | 0  | 0  | 0  | 1  | 2  | 0  | 2  | 0  | 0  | 1  | 0  | 0  | 0  | 0  | 1  | 2  | 0  | 3  | 0  |    |
| ENSP00000262450                  | ENSG000001016254 | CHD5     | 263  | 14 | 8  | 8  | 8  | 10 | 14 | 9   | 8   | 4   | 8  | 6  | 17 | 6  | 7  | 4  | 10 | 7  | 7  | 9  | 13 | 7  | 8  | 7  | 10 | 10 | 12 | 9  | 5  | 13 | 9  | 10 |
| ENSP00000262455                  | ENSG000000023318 | ERP44    | 415  | 18 | 17 | 16 | 10 | 24 | 18 | 14  | 12  | 11  | 11 | 14 | 14 | 10 | 15 | 12 | 8  | 6  | 8  | 13 | 21 | 12 | 15 | 18 | 14 | 17 | 13 | 9  | 19 | 12 | 14 |    |
| ENSP00000262460                  | ENSG000001010003 | GINS1    | 36   | 3  | 2  | 1  | 1  | 2  | 0  | 1   | 0   | 0   | 1  | 0  | 1  | 1  | 2  | 1  | 1  | 0  | 0  | 3  | 3  | 1  | 1  | 0  | 1  | 2  | 1  | 1  | 4  | 0  | 2  |    |
| ENSP00000262461                  | ENSG000000064651 | SLC12A2  | 336  | 18 | 13 | 11 | 10 | 15 | 7  | 15  | 17  | 14  | 5  | 4  | 1  | 9  | 13 | 12 | 2  | 5  | 4  | 9  | 10 | 4  | 10 | 15 | 6  | 37 | 40 | 23 | 2  | 1  | 4  |    |
| ENSP00000262477                  | ENSG000000029725 | RABEP1   | 53   | 2  | 1  | 0  | 2  | 3  | 1  | 0   | 1   | 1   | 0  | 1  | 1  | 2  | 3  | 2  | 2  | 2  | 2  | 3  | 1  | 2  | 0  | 2  | 2  | 2  | 2  | 0  | 4  | 6  | 3  |    |
| ENSP00000262506                  | ENSG000000070770 | CSNK2A2  | 99   | 8  | 4  | 3  | 0  | 1  | 2  | 2   | 0   | 1   | 0  | 7  | 2  | 6  | 4  | 3  | 5  | 3  | 4  | 3  | 2  | 6  | 2  | 3  | 3  | 4  | 7  | 2  | 2  | 7  | 3  |    |
| ENSP00000262507                  | ENSG000000088682 | COQ9     | 31   | 2  | 1  | 0  | 0  | 0  | 1  | 0   | 3   | 2   | 0  | 2  | 1  | 0  | 0  | 1  | 1  | 0  | 1  | 0  | 0  | 1  | 2  | 4  | 1  | 2  | 2  | 1  | 0  | 2  | 1  |    |
| ENSP00000262519                  | ENSG000000099381 | SETD1A   | 32   | 1  | 0  | 1  | 2  | 1  | 2  | 1   | 0   | 2   | 0  | 1  | 1  | 1  | 0  | 2  | 2  | 3  | 0  | 4  | 1  | 2  | 1  | 1  | 1  | 1  | 0  | 0  | 0  | 1  | 0  |    |
| ENSP00000262554                  | ENSG000000090054 | SPTLC1   | 95   | 4  | 2  | 3  | 2  | 3  | 2  | 4   | 2   | 5   | 2  | 3  | 2  | 5  | 3  | 3  | 3  | 2  | 3  | 3  | 3  | 3  | 3  | 6  | 4  | 3  | 6  | 1  | 5  | 2  | 3  |    |
| ENSP00000262570                  | ENSG00000106554  | CHCHD3   | 252  | 9  | 7  | 6  | 3  | 12 | 7  | 9   | 13  | 6   | 9  | 14 | 8  | 8  | 11 | 6  | 5  | 7  | 7  | 5  | 11 | 6  | 17 | 10 | 8  | 7  | 9  | 7  | 9  | 9  | 7  |    |
| ENSP00000262580                  | ENSG00000104518  | GSDMD    | 26   | 1  | 0  | 0  | 2  | 0  | 0  | 1   | 0   | 4   | 0  | 0  | 1  | 0  | 0  | 1  | 0  | 1  | 3  | 0  | 1  | 2  | 0  | 1  | 1  | 2  | 1  | 1  | 0  | 2  | 1  |    |
| ENSP00000262584,ENSP000001061016 | ENSG000001061016 | RPL8     | 176  | 5  | 5  | 8  | 4  | 8  | 7  | 7   | 3   | 7   | 1  | 3  | 3  | 9  | 9  | 5  | 5  | 7  | 8  | 4  | 7  | 4  | 3  | 9  | 6  | 3  | 7  | 8  | 8  | 7  | 6  |    |
| ENSP00000262613                  | ENSG00000109062  | SLC9A3R1 | 295  | 16 | 14 | 18 | 9  | 14 | 9  | 13  | 16  | 12  | 3  | 7  | 3  | 6  | 12 | 8  | 7  | 11 | 10 | 8  | 13 | 6  | 6  | 10 | 4  | 10 | 18 | 9  | 6  | 11 | 6  |    |
| ENSP00000262623                  | ENSG00000105675  | ATP4A    | 110  | 4  | 5  | 6  | 7  | 8  | 4  | 5   | 6   | 2   | 3  | 3  | 2  | 2  | 2  | 2  | 3  | 5  | 1  | 4  | 6  | 3  | 4  | 4  | 3  | 4  | 5  | 1  | 3  | 2  | 1  |    |
| ENSP00000262644                  | ENSG00000104331  | IMPAD1   | 49   | 1  | 3  | 1  | 3  | 1  | 1  | 2   | 1   | 1   | 0  | 1  | 2  | 4  | 1  | 2  | 2  | 1  | 2  | 3  | 2  | 3  | 1  | 1  | 1  | 0  | 3  | 2  | 1  | 2  | 1  |    |
| ENSP00000262646,ENSP00000104388  | ENSG00000104388  | RAB2A    | 139  | 5  | 2  | 2  | 3  | 5  | 5  | 4   | 5   | 6   | 1  | 5  | 4  | 5  | 5  | 6  | 3  | 5  | 7  | 5  | 5  | 3  | 3  | 3  | 4  | 7  | 7  | 5  | 7  | 3  |    |    |
| ENSP00000262650,ENSP000000078747 | ENSG000000078747 | ITCH     | 20   | 1  | 0  | 1  | 0  | 1  | 0  | 0   | 0   | 0   | 0  | 1  | 0  | 0  | 0  | 1  | 2  | 0  | 2  | 1  | 0  | 1  | 0  | 0  | 0  | 2  | 1  | 0  | 2  | 2  | 2  |    |
| ENSP00000262679,ENSP000001078618 | ENSG000001078618 | NRD1     | 107  | 8  | 4  | 4  | 7  | 6  | 9  | 6   | 3   | 3   | 0  | 1  | 0  | 4  | 3  | 2  | 6  | 8  | 4  | 7  | 1  | 2  | 0  | 0  | 0  | 1  | 4  | 1  | 5  | 5  | 3  |    |
| ENSP00000262707,ENSP000001008088 | ENSG000001008088 | CHD8     | 35   | 0  | 1  | 2  | 3  | 1  | 1  | 2   | 0   | 0   | 1  | 0  | 0  | 0  | 1  | 0  | 2  | 0  | 1  | 4  | 3  | 1  | 1  | 3  | 1  | 3  | 1  | 0  | 1  | 1  | 1  |    |
| ENSP00000262710                  | ENSG00000100813  | ACIN1    | 424  | 16 | 12 | 14 | 9  | 9  | 11 | 14  | 10  | 11  | 17 | 16 | 15 | 8  | 17 | 15 | 9  | 11 | 15 | 23 | 23 | 15 | 19 | 23 | 17 | 8  | 20 | 9  | 14 | 12 | 12 |    |
| ENSP00000262713                  | ENSG000001029474 | JUB      | 28   | 0  | 1  | 2  | 1  | 0  | 1  | 1   | 0   | 1   | 1  | 0  | 0  | 2  | 4  | 2  | 1  | 0  | 1  | 2  | 1  | 2  | 2  | 0  | 0  | 1  | 1  | 0  | 1  | 0  | 0  |    |
| ENSP00000262715,ENSP000001029566 | ENSG000001029566 | TEP1     | 13   | 0  | 0  | 0  | 0  | 1  | 1  | 1   | 1   | 1   | 1  | 0  | 0  | 0  | 0  | 1  | 2  | 1  | 0  | 0  | 1  | 1  | 0  | 0  | 1  | 1  | 0  | 0  | 0  | 0  | 0  |    |
| ENSP00000262722,ENSP000001077942 | ENSG000001077942 | FBLN1    | 10   | 3  | 4  | 2  | 1  | 0  | 0  | 0   | 0   | 0   | 0  | 0  | 0  | 0  | 0  | 0  | 0  | 0  | 0  | 0  | 0  | 0  | 0  | 0  | 0  | 0  | 0  | 0  | 0  | 0  | 0  |    |
| ENSP00000262723,ENSP000001077942 | ENSG000001077942 | FBLN1    | 10   | 3  | 4  | 2  | 0  | 0  | 0  | 0   | 0   | 0   | 0  | 0  | 0  | 0  | 0  | 0  | 1  | 0  | 0  | 0  | 0  | 0  | 0  | 0  | 0  | 0  | 0  | 0  | 0  | 0  | 0  |    |
| ENSP00000262746,ENSP00000107450  | ENSG00000107450  | PRDX1    | 975  | 35 | 29 | 26 | 23 | 41 | 29 | 34  | 30  | 20  | 11 | 22 | 22 | 30 | 27 | 25 | 32 | 44 | 37 | 50 | 50 | 34 | 31 | 29 | 29 | 53 | 35 | 30 | 46 | 41 | 30 |    |
| ENSP00000262752                  | ENSG00000107133  | RPS6KA6  | 15   | 2  | 1  | 0  | 0  | 2  | 0  | 1   | 1   | 0   | 1  | 0  | 1  | 0  | 1  | 0  | 0  | 1  | 0  | 1  | 0  | 0  | 0  | 0  | 0  | 1  | 1  | 1  | 0  | 0  | 0  |    |
| ENSP00000262753,ENSP00000102429  | ENSG00000102429  | POF1B    | 84   | 2  | 2  | 3  | 5  | 4  | 4  | 7   | 4   | 8   | 1  | 0  | 2  | 2  | 3  | 3  | 0  | 0  | 0  | 0  | 0  | 0  | 9  | 15 | 10 | 0  | 0  | 0  | 0  | 0  | 0  |    |
| ENSP00000262776                  | ENSG00000108679  | LGALS3BF | 352  | 4  | 5  | 1  | 18 | 28 | 32 | 26  | 27  | 28  | 4  | 7  | 5  | 7  | 3  | 7  | 9  | 5  | 8  | 11 | 11 | 7  | 9  | 13 | 10 | 21 | 26 | 19 | 1  | 0  | 0  |    |
| ENSP00000262801                  | ENSG000000007080 | CCDC124  | 100  | 2  | 2  | 1  | 3  | 2  | 3  | 3   | 2   | 3   | 3  | 3  | 0  | 4  | 3  | 3  | 6  | 6  | 4  | 3  | 3  | 4  | 5  | 3  | 4  | 4  | 4  | 4  | 3  | 4  | 6  |    |
| ENSP00000262803                  | ENSG000000005007 | UPF1     | 342  | 23 | 8  | 10 | 14 | 11 | 5  | 13  | 8   | 9   | 3  | 12 | 10 | 8  | 8  | 7  | 9  | 10 | 9  | 15 | 19 | 6  | 6  | 19 | 5  | 11 | 17 | 13 | 15 | 17 | 15 |    |
| ENSP00000262809                  | ENSG00000105656  | ELL      | 20   | 0  | 0  | 0  | 1  | 0  | 0  | 0   | 0   | 1   | 0  | 0  | 0  | 0  | 1  | 0  | 0  | 2  | 1  | 2  | 2  | 2  | 0  | 0  | 0  | 1  | 0  | 0  | 4  | 2  | 1  |    |
| ENSP00000262812                  | ENSG00000105669  | COPE     | 227  | 11 | 9  | 3  | 12 | 14 | 12 | 5   | 5   | 8   | 2  | 4  | 1  | 7  | 4  | 6  | 7  | 5  | 3  | 6  | 13 | 6  | 5  | 10 | 4  | 13 | 18 | 9  | 4  | 13 | 8  |    |
| ENSP00000262832,ENSP000001001219 | ENSG000001001219 | E1F3L    | 464  | 24 | 14 | 9  | 8  | 16 | 9  | 18  | 13  | 14  | 5  | 17 | 12 | 13 | 13 | 16 | 17 | 23 | 20 | 17 | 26 | 20 | 10 | 18 | 9  | 17 | 22 | 11 | 19 | 19 | 15 |    |
| ENSP00000262835,ENSP000001006836 | ENSG000001006836 | ACSL4    | 76   | 3  | 1  | 2  | 2  | 1  | 4  | 7   | 3   | 7   | 1  | 7  | 1  | 2  | 0  | 1  | 2  | 0  | 2  | 1  | 1  | 2  | 3  | 4  | 2  | 0  | 5  | 3  | 2  | 3  | 4  |    |
| ENSP00000262878                  | ENSG000001013347 | SAMHD1   | 152  | 9  | 7  | 6  | 1  | 1  | 1  | 9   | 7   | 3   | 2  | 7  | 3  | 2  | 3  | 2  | 4  | 5  | 4  | 7  | 9  | 6  | 3  | 5  | 6  | 11 | 10 | 4  | 3  | 4  | 8  |    |

|                                  |                 |          |      |    |    |    |    |     |    |     |    |    |    |     |    |    |    |    |    |     |    |    |    |    |    |     |    |    |    |    |    |    |    |   |
|----------------------------------|-----------------|----------|------|----|----|----|----|-----|----|-----|----|----|----|-----|----|----|----|----|----|-----|----|----|----|----|----|-----|----|----|----|----|----|----|----|---|
| ENSP00000263578                  | ENSG00000110074 | FOXRED1  | 15   | 0  | 0  | 0  | 1  | 0   | 0  | 1   | 0  | 2  | 0  | 1   | 1  | 0  | 0  | 1  | 0  | 0   | 1  | 0  | 0  | 0  | 0  | 0   | 1  | 1  | 2  | 2  | 0  | 0  | 1  |   |
| ENSP00000263579                  | ENSG00000110063 | DCPS     | 130  | 6  | 5  | 3  | 3  | 4   | 4  | 3   | 3  | 11 | 0  | 7   | 2  | 1  | 2  | 2  | 6  | 2   | 4  | 2  | 3  | 5  | 4  | 8   | 5  | 6  | 6  | 6  | 2  | 8  | 7  |   |
| ENSP00000263593                  | ENSG00000110013 | SIAE     | 18   | 0  | 0  | 0  | 0  | 0   | 0  | 2   | 1  | 0  | 0  | 0   | 0  | 0  | 0  | 0  | 1  | 0   | 1  | 0  | 0  | 0  | 1  | 1   | 3  | 2  | 3  | 3  | 0  | 0  | 0  |   |
| ENSP00000263635                  | ENSG00000115183 | TANC1    | 12   | 0  | 0  | 0  | 1  | 0   | 1  | 1   | 1  | 0  | 0  | 0   | 0  | 0  | 0  | 0  | 1  | 0   | 0  | 1  | 0  | 0  | 0  | 2   | 0  | 0  | 0  | 1  | 1  | 0  | 2  |   |
| ENSP00000263645,ENSP00000110651  | ENSG00000110651 | CDB1     | 43   | 2  | 4  | 1  | 0  | 0   | 0  | 1   | 0  | 2  | 1  | 4   | 1  | 2  | 0  | 1  | 1  | 3   | 0  | 2  | 4  | 0  | 0  | 0   | 0  | 4  | 3  | 0  | 2  | 4  | 1  |   |
| ENSP00000263657                  | ENSG00000115946 | PN01     | 56   | 2  | 2  | 4  | 2  | 1   | 2  | 1   | 1  | 1  | 2  | 1   | 2  | 1  | 2  | 3  | 0  | 2   | 1  | 2  | 4  | 0  | 2  | 2   | 2  | 3  | 3  | 1  | 2  | 0  | 2  |   |
| ENSP00000263672                  | ENSG00000118363 | SPCS2    | 93   | 6  | 6  | 0  | 2  | 2   | 4  | 2   | 0  | 4  | 0  | 6   | 1  | 3  | 0  | 5  | 2  | 5   | 5  | 2  | 1  | 6  | 0  | 3   | 5  | 3  | 5  | 4  | 1  | 6  | 4  |   |
| ENSP00000263674                  | ENSG00000110237 | ARHGEF1  | 20   | 0  | 1  | 0  | 1  | 1   | 1  | 0   | 0  | 1  | 0  | 0   | 0  | 1  | 1  | 0  | 1  | 4   | 1  | 4  | 1  | 1  | 1  | 1   | 0  | 0  | 0  | 0  | 0  | 0  | 0  |   |
| ENSP00000263681                  | ENSG00000077514 | POLD3    | 4    | 4  | 2  | 0  | 1  | 0   | 1  | 1   | 2  | 1  | 0  | 6   | 1  | 0  | 0  | 1  | 1  | 1   | 0  | 3  | 4  | 2  | 1  | 0   | 4  | 0  | 2  | 0  | 0  | 1  | 2  |   |
| ENSP00000263694                  | ENSG00000060688 | SNRNP40  | 69   | 2  | 2  | 0  | 2  | 2   | 2  | 2   | 2  | 2  | 0  | 2   | 4  | 2  | 0  | 2  | 3  | 2   | 3  | 3  | 3  | 2  | 2  | 4   | 5  | 4  | 3  | 2  | 3  | 3  | 1  |   |
| ENSP00000263697                  | ENSG00000126698 | DNAJC8   | 166  | 10 | 3  | 6  | 4  | 5   | 4  | 4   | 4  | 2  | 7  | 7   | 3  | 4  | 8  | 5  | 6  | 8   | 4  | 5  | 9  | 9  | 4  | 4   | 2  | 2  | 9  | 2  | 12 | 8  | 6  |   |
| ENSP00000263710                  | ENSG00000074054 | CLASP1   | 51   | 2  | 3  | 2  | 1  | 0   | 0  | 4   | 1  | 2  | 1  | 2   | 1  | 0  | 1  | 4  | 4  | 1   | 2  | 2  | 1  | 4  | 0  | 4   | 0  | 2  | 1  | 0  | 2  | 3  | 1  |   |
| ENSP00000263713,ENSP00000115109  | ENSG00000115109 | EPB41L5  | 11   | 0  | 1  | 0  | 0  | 0   | 0  | 0   | 0  | 0  | 0  | 2   | 1  | 0  | 0  | 1  | 0  | 1   | 1  | 0  | 0  | 1  | 0  | 1   | 0  | 0  | 1  | 1  | 0  | 0  | 0  |   |
| ENSP00000263733                  | ENSG00000116199 | FAM20B   | 10   | 1  | 1  | 0  | 0  | 1   | 0  | 1   | 1  | 1  | 0  | 0   | 0  | 0  | 0  | 1  | 0  | 0   | 0  | 1  | 1  | 1  | 0  | 0   | 0  | 0  | 0  | 0  | 0  | 0  | 0  |   |
| ENSP00000263735                  | ENSG00000119888 | EPCAM    | 223  | 5  | 6  | 2  | 3  | 3   | 6  | 5   | 9  | 8  | 2  | 12  | 5  | 6  | 5  | 10 | 5  | 5   | 7  | 10 | 13 | 13 | 8  | 19  | 15 | 7  | 17 | 17 | 0  | 0  | 0  |   |
| ENSP00000263736                  | ENSG00000068784 | SRBD1    | 64   | 2  | 0  | 3  | 3  | 1   | 2  | 2   | 2  | 0  | 0  | 1   | 0  | 5  | 1  | 5  | 6  | 5   | 4  | 5  | 4  | 2  | 1  | 1   | 2  | 3  | 1  | 1  | 0  | 1  | 1  |   |
| ENSP00000263773                  | ENSG00000109920 | FNBP4    | 29   | 3  | 1  | 1  | 0  | 0   | 0  | 1   | 1  | 0  | 2  | 3   | 2  | 1  | 1  | 0  | 1  | 0   | 0  | 2  | 0  | 2  | 0  | 1   | 1  | 1  | 0  | 0  | 1  | 3  | 1  |   |
| ENSP00000263774                  | ENSG00000213619 | NDUFS3   | 275  | 12 | 8  | 9  | 8  | 9   | 11 | 8   | 11 | 7  | 7  | 13  | 10 | 5  | 6  | 8  | 10 | 9   | 10 | 8  | 13 | 8  | 9  | 12  | 9  | 9  | 14 | 9  | 7  | 9  | 7  |   |
| ENSP00000263780                  | ENSG00000083937 | CHMP2B   | 31   | 2  | 0  | 1  | 0  | 0   | 0  | 0   | 1  | 2  | 0  | 1   | 1  | 0  | 3  | 1  | 0  | 1   | 0  | 0  | 2  | 0  | 4  | 2   | 0  | 0  | 3  | 0  | 1  | 4  | 2  |   |
| ENSP00000263791,ENSP00000128829  | ENSG00000128829 | E1F2AK4  | 40   | 2  | 0  | 2  | 0  | 0   | 0  | 0   | 0  | 0  | 0  | 0   | 0  | 2  | 1  | 0  | 0  | 2   | 3  | 0  | 4  | 4  | 1  | 1   | 3  | 2  | 2  | 0  | 0  | 3  | 5  | 3 |
| ENSP00000263801,ENSP000001067369 | ENSG00000067369 | TP53BP1  | 316  | 13 | 3  | 8  | 11 | 6   | 11 | 10  | 15 | 9  | 9  | 11  | 1  | 13 | 6  | 9  | 12 | 15  | 10 | 12 | 14 | 10 | 18 | 20  | 16 | 10 | 13 | 7  | 5  | 14 | 5  |   |
| ENSP00000263802                  | ENSG00000128881 | TBK2     | 2187 | 61 | 51 | 35 | 83 | 168 | 64 | 252 | 45 | 96 | 39 | 165 | 77 | 66 | 43 | 59 | 50 | 126 | 38 | 76 | 87 | 47 | 77 | 119 | 89 | 38 | 56 | 64 | 5  | 6  | 5  |   |
| ENSP00000263812                  | ENSG00000115840 | SLC25A12 | 80   | 1  | 1  | 1  | 2  | 5   | 6  | 7   | 2  | 1  | 1  | 6   | 3  | 2  | 1  | 5  | 0  | 2   | 3  | 3  | 4  | 3  | 2  | 3   | 5  | 2  | 1  | 1  | 2  | 3  | 2  |   |
| ENSP00000263816                  | ENSG00000081479 | LRP2     | 57   | 27 | 16 | 12 | 0  | 0   | 0  | 0   | 0  | 0  | 0  | 0   | 0  | 0  | 0  | 0  | 1  | 0   | 0  | 0  | 0  | 1  | 0  | 0   | 0  | 0  | 0  | 0  | 0  | 0  | 0  |   |
| ENSP00000263817                  | ENSG00000073734 | ABCB11   | 21   | 0  | 1  | 0  | 0  | 0   | 0  | 0   | 0  | 0  | 0  | 2   | 1  | 0  | 1  | 2  | 0  | 0   | 0  | 0  | 0  | 2  | 3  | 0   | 2  | 1  | 2  | 2  | 1  | 0  | 1  | 0 |
| ENSP00000263837,ENSP00000115761  | ENSG00000115761 | NOL10    | 57   | 2  | 0  | 4  | 1  | 0   | 1  | 1   | 0  | 1  | 3  | 3   | 1  | 2  | 1  | 3  | 2  | 2   | 4  | 1  | 2  | 2  | 3  | 3   | 1  | 0  | 1  | 0  | 4  | 7  | 2  |   |
| ENSP00000263845,ENSP00000110031  | ENSG00000110031 | LPXN     | 10   | 0  | 0  | 0  | 1  | 7   | 2  | 0   | 0  | 0  | 0  | 0   | 0  | 0  | 0  | 0  | 0  | 0   | 0  | 0  | 0  | 0  | 0  | 0   | 0  | 0  | 0  | 0  | 0  | 0  | 0  |   |
| ENSP00000263847                  | ENSG00000110048 | OSBP     | 256  | 9  | 7  | 10 | 11 | 9   | 13 | 9   | 10 | 5  | 3  | 3   | 5  | 8  | 10 | 7  | 5  | 7   | 5  | 12 | 14 | 9  | 5  | 8   | 3  | 15 | 13 | 11 | 10 | 7  |    |   |
| ENSP00000263857                  | ENSG00000068654 | POLR1A   | 152  | 4  | 4  | 3  | 2  | 2   | 0  | 0   | 3  | 6  | 3  | 5   | 3  | 7  | 9  | 4  | 4  | 4   | 4  | 3  | 7  | 8  | 1  | 7   | 13 | 9  | 6  | 5  | 3  | 6  | 12 | 4 |
| ENSP00000263864                  | ENSG00000118640 | VAMP8    | 22   | 0  | 0  | 0  | 0  | 0   | 2  | 2   | 1  | 0  | 2  | 2   | 3  | 0  | 0  | 2  | 0  | 0   | 0  | 0  | 0  | 1  | 2  | 1   | 2  | 1  | 1  | 0  | 0  | 0  | 0  |   |
| ENSP00000263867,ENSP00000104293  | ENSG00000004293 | CAPG     | 105  | 0  | 0  | 0  | 1  | 2   | 2  | 7   | 9  | 14 | 2  | 2   | 1  | 0  | 0  | 2  | 8  | 4   | 7  | 0  | 2  | 1  | 5  | 11  | 3  | 0  | 1  | 1  | 4  | 10 | 6  |   |
| ENSP00000263897                  | ENSG00000053501 | USE1     | 23   | 1  | 2  | 1  | 1  | 0   | 1  | 0   | 0  | 0  | 1  | 1   | 1  | 0  | 1  | 0  | 1  | 0   | 1  | 2  | 0  | 1  | 0  | 0   | 1  | 2  | 1  | 2  | 0  | 0  | 2  |   |
| ENSP00000263904                  | ENSG00000115145 | STAM2    | 53   | 3  | 1  | 2  | 2  | 4   | 2  | 3   | 1  | 1  | 1  | 1   | 0  | 2  | 1  | 3  | 2  | 4   | 1  | 2  | 2  | 2  | 1  | 1   | 0  | 3  | 3  | 2  | 1  | 1  | 1  |   |
| ENSP00000263918                  | ENSG00000115808 | STRN     | 67   | 4  | 1  | 3  | 2  | 4   | 1  | 2   | 2  | 2  | 1  | 4   | 2  | 3  | 2  | 3  | 3  | 1   | 2  | 1  | 3  | 1  | 3  | 3   | 2  | 3  | 4  | 1  | 2  | 1  | 1  |   |
| ENSP00000263935,ENSP00000105423  | ENSG00000054523 | KIF1B    | 39   | 1  | 0  | 3  | 3  | 1   | 1  | 0   | 0  | 0  | 0  | 1   | 2  | 2  | 2  | 0  | 1  | 0   | 0  | 4  | 2  | 2  | 2  | 2   | 2  | 0  | 2  | 3  | 1  | 2  | 0  | 2 |
| ENSP00000263956                  | ENSG00000119041 | GTF3C3   | 74   | 2  | 1  | 2  | 3  | 2   | 2  | 2   | 3  | 1  | 3  | 1   | 2  | 3  | 3  | 2  | 3  | 2   | 4  | 3  | 3  | 2  | 2  | 3   | 2  | 4  | 2  | 1  | 3  | 4  | 4  |   |
| ENSP00000263964                  | ENSG00000177565 | TBL1XR1  | 36   | 2  | 0  | 0  | 0  | 0   | 2  | 3   | 0  | 2  | 0  | 2   | 2  | 0  | 0  | 1  | 1  | 3   | 1  | 1  | 1  | 2  | 1  | 3   | 1  | 1  | 2  | 0  | 1  | 1  | 3  |   |
| ENSP00000263966                  | ENSG00000058056 | USP13    | 11   | 0  | 1  | 0  | 1  | 2   | 1  | 0   | 0  | 0  | 0  | 1   | 0  | 0  | 0  | 0  | 1  | 1   | 1  | 0  | 0  | 0  | 0  | 0   | 0  | 0  | 0  | 0  | 0  | 2  | 0  |   |
| ENSP00000263969,ENSP00000171109  | ENSG00000171109 | MFN1     | 27   | 1  | 0  | 1  | 1  | 1   | 1  | 2   | 1  | 0  | 0  | 1   | 1  | 1  | 1  | 1  | 2  | 0   | 1  | 0  | 1  | 0  | 1  | 1   | 1  | 0  | 2  | 0  | 3  | 1  | 1  |   |
| ENSP00000263985                  | ENSG00000059691 | PET112L  | 30   | 0  | 0  | 1  | 0  | 0   | 0  | 0   | 0  | 1  | 2  | 0   | 0  | 0  | 2  | 2  | 2  | 1   | 1  | 2  | 0  | 1  | 1  | 1   | 1  | 3  | 2  | 4  | 1  | 1  | 1  |   |
| ENSP00000263989,ENSP00000115464  | ENSG00000115464 | USP34    | 35   | 3  | 3  | 0  | 0  | 1   | 2  | 0   | 1  | 1  | 1  | 2   | 3  | 0  | 1  | 1  | 2  | 1   | 1  | 0  | 2  | 0  | 1  | 4   | 1  | 0  | 1  | 2  | 0  | 0  | 1  |   |
| ENSP00000264010                  | ENSG00000102974 | CTCF     | 28   | 0  | 2  | 2  | 2  | 1   | 2  | 2   | 1  | 1  | 0  | 1   | 1  | 1  | 3  | 1  | 0  | 0   | 1  | 1  | 0  | 3  | 0  | 1   | 1  | 0  | 0  | 1  | 0  | 0  | 0  |   |
| ENSP00000264012                  | ENSG00000062038 | CDH3     | 54   | 4  | 5  | 2  | 0  | 0   | 0  | 2   | 0  | 1  | 0  | 1   | 3  | 0  | 1  | 2  | 3  | 5   | 7  | 2  | 0  | 6  | 1  | 3   | 2  | 1  | 0  | 3  | 0  | 0  | 0  |   |
| ENSP00000264018                  | ENSG00000110367 | DDX6     | 175  | 9  | 6  | 5  | 6  | 7   | 9  | 4   | 5  | 5  | 3  | 10  | 3  | 4  | 4  | 7  | 7  | 11  | 2  | 5  | 5  | 5  | 2  | 5   | 3  | 9  | 8  | 5  | 5  | 11 | 5  |   |
| ENSP00000264028,ENSP00000109513  | ENSG0000009513  | ARGN1    | 231  | 18 | 12 | 7  | 9  | 9   | 15 | 14  | 4  | 11 | 0  | 4   | 4  | 4  | 1  | 8  | 7  | 6   | 7  | 11 | 8  | 6  | 4  | 9   | 4  | 6  | 10 | 12 | 5  | 8  | 7  |   |
| ENSP00000264033                  | ENSG00000110395 | CBL      | 29   | 2  | 0  | 2  | 1  | 1   | 0  | 1   | 0  | 0  | 0  | 0   | 0  | 1  | 0  | 1  | 3  | 3   | 1  | 2  | 1  | 2  | 0  | 0   | 0  | 0  | 0  | 0  | 3  | 2  | 3  |   |
| ENSP00000264036                  | ENSG00000076706 | MCAM     | 11   | 0  | 0  | 0  | 0  | 0   | 0  | 0   | 0  | 0  | 6  | 3   | 2  | 0  | 0  | 0  | 0  | 0   | 0  | 0  | 0  | 0  | 0  | 0   | 0  | 0  | 0  | 0  | 0  | 0  | 0  |   |
| ENSP00000264039                  | ENSG00000063660 | GPC1     | 23   | 0  | 0  | 0  | 0  | 0   | 0  | 0   | 0  | 0  | 2  | 4   | 5  | 0  | 0  | 1  | 0  | 1   | 0  | 5  | 0  | 2  | 1  | 0   | 0  | 0  | 0  | 0  | 1  | 1  | 0  |   |
| ENSP00000264042                  | ENSG00000006607 | FARP2    | 26   | 0  | 0  | 0  | 2  | 1   | 1  | 1   | 2  | 3  | 0  | 1   | 0  | 0  | 0  | 0  | 4  | 0   | 0  | 1  | 0  | 2  | 0  | 0   | 0  | 0  | 1  | 2  | 2  | 1  | 0  | 2 |
| ENSP00000264071                  | ENSG00000104833 | TUBB4    | 1190 | 46 | 34 | 48 | 27 | 66  | 46 | 35  | 14 | 27 | 20 | 33  | 20 | 32 | 47 | 32 | 32 | 43  | 41 | 35 | 64 | 37 | 27 | 35  | 26 | 69 | 57 | 56 | 48 | 57 | 36 |   |
| ENSP00000264106,ENSP00000109149  | ENSG0000009149  | ITGA6    | 367  | 3  | 4  | 1  | 21 | 30  | 26 | 11  | 9  | 18 | 9  | 17  | 15 | 11 | 7  | 16 | 4  | 11  | 12 | 5  | 6  | 4  | 16 | 24  | 18 | 18 | 30 | 20 | 1  | 0  | 0  |   |
| ENSP                             |                 |          |      |    |    |    |    |     |    |     |    |    |    |     |    |    |    |    |    |     |    |    |    |    |    |     |    |    |    |    |    |    |    |   |

[illegible]

|                                  |                  |          |      |    |    |    |    |     |    |    |    |    |    |    |    |    |    |    |    |    |    |    |    |    |    |    |    |    |     |    |    |    |    |
|----------------------------------|------------------|----------|------|----|----|----|----|-----|----|----|----|----|----|----|----|----|----|----|----|----|----|----|----|----|----|----|----|----|-----|----|----|----|----|
| ENSP00000266481                  | ENSG000000087470 | DNM1L    | 226  | 16 | 10 | 10 | 4  | 6   | 5  | 6  | 9  | 6  | 1  | 7  | 1  | 6  | 3  | 4  | 11 | 10 | 7  | 5  | 8  | 7  | 4  | 16 | 5  | 5  | 11  | 4  | 12 | 13 | 14 |
| ENSP00000266482                  | ENSG000000139132 | FGD4     | 25   | 1  | 0  | 0  | 1  | 1   | 1  | 3  | 3  | 0  | 0  | 1  | 0  | 0  | 0  | 0  | 0  | 0  | 0  | 2  | 1  | 0  | 3  | 2  | 2  | 1  | 1   | 1  | 0  | 0  |    |
| ENSP00000266508,ENSP000000139154 | ENSG000000139154 | AEBP2    | 12   | 0  | 0  | 0  | 1  | 0   | 1  | 0  | 0  | 0  | 0  | 1  | 0  | 1  | 1  | 0  | 2  | 2  | 0  | 0  | 1  | 1  | 0  | 0  | 0  | 1  | 0   | 0  | 0  | 0  |    |
| ENSP00000266517,ENSP000000139163 | ENSG000000139163 | ETNK1    | 13   | 2  | 0  | 0  | 1  | 0   | 1  | 1  | 0  | 1  | 0  | 0  | 0  | 0  | 0  | 0  | 0  | 0  | 1  | 0  | 0  | 0  | 1  | 0  | 0  | 0  | 0   | 0  | 3  | 2  |    |
| ENSP00000266544                  | ENSG000000139180 | NDUFA9   | 59   | 4  | 2  | 1  | 1  | 2   | 2  | 1  | 2  | 2  | 0  | 1  | 2  | 2  | 0  | 1  | 4  | 2  | 3  | 1  | 1  | 3  | 1  | 2  | 4  | 3  | 2   | 3  | 2  | 2  |    |
| ENSP00000266564,ENSP000000139197 | ENSG000000139197 | PEX5     | 20   | 1  | 2  | 0  | 0  | 0   | 1  | 1  | 0  | 2  | 0  | 0  | 0  | 0  | 0  | 1  | 0  | 1  | 0  | 0  | 0  | 0  | 0  | 0  | 0  | 1  | 1   | 1  | 2  | 5  |    |
| ENSP00000266604                  | ENSG000000139233 | LLPH     | 84   | 3  | 4  | 1  | 3  | 1   | 2  | 2  | 0  | 1  | 0  | 4  | 4  | 3  | 0  | 4  | 5  | 4  | 6  | 3  | 2  | 3  | 2  | 5  | 4  | 3  | 3   | 2  | 3  | 5  |    |
| ENSP00000266679                  | ENSG00000011605  | CPSF6    | 126  | 5  | 4  | 4  | 4  | 2   | 3  | 5  | 2  | 3  | 6  | 5  | 7  | 1  | 3  | 1  | 1  | 7  | 4  | 5  | 4  | 5  | 5  | 6  | 3  | 5  | 3   | 6  | 5  | 6  |    |
| ENSP00000266712                  | ENSG000000139324 | TMTC3    | 32   | 3  | 3  | 1  | 1  | 0   | 0  | 1  | 1  | 0  | 0  | 0  | 0  | 2  | 1  | 1  | 2  | 2  | 2  | 1  | 2  | 2  | 0  | 2  | 1  | 2  | 0   | 0  | 1  | 1  |    |
| ENSP00000266732                  | ENSG000000120802 | TMPO     | 553  | 20 | 19 | 18 | 16 | 23  | 14 | 14 | 19 | 12 | 11 | 23 | 16 | 21 | 14 | 13 | 22 | 16 | 11 | 17 | 23 | 21 | 22 | 27 | 23 | 17 | 16  | 13 | 30 | 19 |    |
| ENSP00000266735                  | ENSG000000139343 | SNRPF    | 35   | 3  | 0  | 3  | 0  | 0   | 0  | 0  | 0  | 2  | 0  | 0  | 0  | 1  | 1  | 1  | 1  | 1  | 0  | 3  | 0  | 3  | 7  | 0  | 0  | 4  | 0   | 3  | 2  | 0  |    |
| ENSP00000266742                  | ENSG000000139350 | NEDD1    | 27   | 1  | 0  | 0  | 3  | 2   | 2  | 0  | 0  | 1  | 0  | 0  | 1  | 0  | 1  | 0  | 2  | 2  | 1  | 1  | 1  | 1  | 0  | 2  | 0  | 3  | 1   | 0  | 3  | 0  |    |
| ENSP00000266839                  | ENSG000000139428 | MMAB     | 48   | 1  | 3  | 0  | 3  | 4   | 5  | 3  | 0  | 0  | 3  | 0  | 1  | 0  | 1  | 0  | 2  | 1  | 1  | 2  | 0  | 1  | 2  | 0  | 1  | 3  | 3   | 4  | 0  | 2  |    |
| ENSP00000266970,ENSP000000123374 | ENSG000000123374 | CDK2     | 29   | 3  | 1  | 1  | 1  | 0   | 1  | 2  | 0  | 1  | 0  | 2  | 1  | 0  | 0  | 1  | 1  | 0  | 1  | 1  | 0  | 0  | 1  | 1  | 1  | 0  | 2   | 0  | 2  | 2  |    |
| ENSP00000267012                  | ENSG000000110934 | BIN2     | 22   | 2  | 2  | 0  | 2  | 0   | 0  | 1  | 0  | 0  | 0  | 0  | 0  | 2  | 2  | 1  | 0  | 1  | 0  | 3  | 1  | 1  | 0  | 0  | 0  | 1  | 0   | 1  | 1  | 0  |    |
| ENSP00000267103,ENSP000000139637 | ENSG000000139637 | C12orf10 | 132  | 3  | 3  | 5  | 3  | 7   | 3  | 3  | 3  | 3  | 2  | 9  | 3  | 4  | 3  | 3  | 5  | 7  | 8  | 5  | 3  | 3  | 4  | 5  | 4  | 7  | 6   | 6  | 4  | 5  |    |
| ENSP00000267119                  | ENSG000000139648 | KRT71    | 24   | 0  | 2  | 0  | 1  | 0   | 0  | 1  | 0  | 0  | 0  | 3  | 1  | 1  | 0  | 1  | 1  | 0  | 2  | 1  | 0  | 2  | 1  | 2  | 3  | 0  | 1   | 1  | 0  | 0  |    |
| ENSP00000267163                  | ENSG000000139687 | RB1      | 54   | 1  | 0  | 0  | 4  | 3   | 2  | 2  | 2  | 2  | 1  | 6  | 0  | 1  | 2  | 2  | 1  | 0  | 1  | 3  | 2  | 0  | 1  | 3  | 0  | 2  | 4   | 0  | 4  | 3  |    |
| ENSP00000267169,ENSP000000184047 | ENSG000000184047 | DIABLO   | 99   | 5  | 2  | 5  | 3  | 2   | 2  | 4  | 3  | 2  | 3  | 7  | 2  | 1  | 4  | 4  | 1  | 2  | 1  | 5  | 5  | 1  | 6  | 6  | 3  | 4  | 4   | 2  | 3  | 5  |    |
| ENSP00000267176                  | ENSG000000139697 | SBN01    | 76   | 5  | 5  | 4  | 6  | 2   | 1  | 4  | 0  | 0  | 1  | 0  | 0  | 4  | 0  | 3  | 5  | 2  | 1  | 5  | 6  | 3  | 2  | 1  | 1  | 0  | 0   | 0  | 10 | 2  |    |
| ENSP00000267199                  | ENSG000000139719 | VPS33A   | 13   | 0  | 1  | 1  | 1  | 0   | 1  | 2  | 0  | 1  | 0  | 0  | 0  | 1  | 0  | 0  | 0  | 0  | 0  | 0  | 0  | 0  | 0  | 0  | 0  | 0  | 1   | 1  | 0  | 2  |    |
| ENSP00000267202                  | ENSG000000139722 | VPS37B   | 50   | 1  | 2  | 0  | 2  | 2   | 3  | 2  | 3  | 2  | 0  | 0  | 0  | 0  | 1  | 0  | 1  | 4  | 2  | 2  | 1  | 1  | 0  | 1  | 2  | 2  | 2   | 3  | 5  | 4  |    |
| ENSP00000267229                  | ENSG000000139746 | RBM26    | 171  | 4  | 5  | 5  | 4  | 5   | 8  | 6  | 4  | 5  | 5  | 11 | 5  | 5  | 3  | 6  | 8  | 9  | 6  | 7  | 3  | 4  | 5  | 8  | 6  | 2  | 1   | 4  | 10 | 7  |    |
| ENSP00000267328                  | ENSG000000139832 | RAB20    | 26   | 3  | 2  | 0  | 2  | 1   | 2  | 2  | 0  | 1  | 0  | 2  | 0  | 0  | 2  | 0  | 0  | 0  | 2  | 1  | 1  | 1  | 0  | 0  | 0  | 1  | 1   | 0  | 0  | 0  |    |
| ENSP00000267425                  | ENSG000000196943 | C14orf21 | 53   | 2  | 2  | 1  | 2  | 1   | 2  | 2  | 1  | 1  | 1  | 1  | 0  | 0  | 1  | 0  | 3  | 2  | 0  | 4  | 2  | 2  | 1  | 4  | 3  | 2  | 3   | 2  | 5  | 1  |    |
| ENSP00000267434                  | ENSG000000139921 | TMX1     | 189  | 8  | 3  | 6  | 9  | 10  | 4  | 7  | 8  | 3  | 3  | 6  | 5  | 8  | 4  | 6  | 8  | 9  | 5  | 9  | 11 | 4  | 6  | 6  | 5  | 8  | 6   | 4  | 6  | 7  |    |
| ENSP00000267436                  | ENSG000000087299 | L2HGDH   | 80   | 4  | 3  | 1  | 2  | 2   | 1  | 4  | 1  | 2  | 1  | 5  | 3  | 1  | 1  | 0  | 2  | 2  | 3  | 5  | 1  | 2  | 3  | 7  | 6  | 4  | 4   | 4  | 1  | 3  |    |
| ENSP00000267512                  | ENSG000000139998 | RAB15    | 148  | 5  | 3  | 4  | 6  | 7   | 5  | 16 | 7  | 3  | 2  | 5  | 2  | 4  | 3  | 2  | 5  | 5  | 6  | 5  | 4  | 4  | 7  | 3  | 9  | 5  | 3   | 4  | 5  | 4  |    |
| ENSP00000267622                  | ENSG000000100815 | TRIP11   | 150  | 3  | 3  | 3  | 3  | 5   | 1  | 5  | 2  | 4  | 5  | 5  | 9  | 7  | 7  | 12 | 3  | 3  | 1  | 7  | 12 | 9  | 6  | 9  | 4  | 1  | 4   | 5  | 3  | 6  |    |
| ENSP00000267750,ENSP000000128463 | ENSG000000128463 | TMEM85   | 35   | 0  | 1  | 1  | 3  | 2   | 1  | 2  | 2  | 2  | 1  | 1  | 0  | 2  | 3  | 1  | 0  | 1  | 0  | 2  | 3  | 1  | 1  | 0  | 0  | 1  | 0   | 1  | 1  | 1  |    |
| ENSP00000267812                  | ENSG000000140259 | MFAP1    | 49   | 2  | 2  | 1  | 0  | 0   | 2  | 1  | 2  | 3  | 1  | 3  | 0  | 0  | 4  | 0  | 2  | 1  | 2  | 1  | 5  | 2  | 3  | 4  | 1  | 2  | 0   | 2  | 0  | 2  |    |
| ENSP00000267814                  | ENSG000000140263 | SORD     | 112  | 6  | 3  | 3  | 3  | 7   | 6  | 7  | 1  | 6  | 1  | 2  | 1  | 2  | 0  | 0  | 5  | 8  | 4  | 2  | 2  | 4  | 0  | 2  | 2  | 3  | 9   | 6  | 3  | 9  |    |
| ENSP00000267842,ENSP000000140284 | ENSG000000140284 | SLC27A2  | 177  | 4  | 1  | 3  | 6  | 9   | 6  | 7  | 5  | 5  | 0  | 4  | 3  | 7  | 1  | 6  | 4  | 5  | 4  | 5  | 9  | 7  | 5  | 12 | 9  | 16 | 13  | 10 | 4  | 4  |    |
| ENSP00000267884                  | ENSG000000140319 | SRP14    | 111  | 2  | 6  | 0  | 1  | 4   | 6  | 3  | 1  | 3  | 0  | 6  | 3  | 4  | 0  | 6  | 3  | 4  | 7  | 2  | 6  | 3  | 6  | 3  | 1  | 6  | 2   | 5  | 6  | 5  |    |
| ENSP00000267935                  | ENSG000000140365 | COMMD4   | 25   | 2  | 1  | 1  | 1  | 1   | 1  | 1  | 0  | 1  | 0  | 0  | 0  | 1  | 1  | 0  | 1  | 0  | 0  | 1  | 1  | 2  | 1  | 1  | 0  | 1  | 1   | 2  | 1  | 1  |    |
| ENSP00000267950                  | ENSG000000140374 | ETFA     | 433  | 17 | 12 | 14 | 9  | 22  | 18 | 24 | 7  | 16 | 10 | 19 | 13 | 11 | 7  | 11 | 9  | 15 | 11 | 11 | 12 | 10 | 15 | 15 | 15 | 29 | 19  | 18 | 12 | 13 |    |
| ENSP00000267973                  | ENSG000000140395 | WDR61    | 93   | 5  | 3  | 4  | 4  | 6   | 3  | 4  | 4  | 7  | 0  | 5  | 1  | 1  | 0  | 1  | 2  | 4  | 3  | 1  | 4  | 3  | 2  | 6  | 3  | 2  | 4   | 1  | 4  | 3  |    |
| ENSP00000267974                  | ENSG000000140396 | NCOA2    | 10   | 0  | 0  | 0  | 0  | 0   | 0  | 1  | 0  | 1  | 0  | 0  | 0  | 0  | 2  | 0  | 0  | 1  | 0  | 1  | 0  | 0  | 0  | 0  | 0  | 1  | 1   | 1  | 0  | 1  |    |
| ENSP00000268035                  | ENSG000000140443 | IGF1R    | 20   | 1  | 1  | 0  | 2  | 1   | 1  | 2  | 0  | 1  | 0  | 0  | 1  | 0  | 0  | 0  | 1  | 0  | 0  | 1  | 1  | 1  | 0  | 3  | 2  | 0  | 1   | 0  | 0  | 0  |    |
| ENSP00000268058                  | ENSG000000140464 | PML      | 138  | 3  | 1  | 3  | 6  | 9   | 11 | 9  | 5  | 8  | 5  | 2  | 8  | 2  | 2  | 2  | 0  | 2  | 3  | 2  | 3  | 3  | 2  | 11 | 13 | 8  | 4   | 6  | 3  | 3  |    |
| ENSP00000268097                  | ENSG000000140470 | HEXA     | 200  | 6  | 5  | 5  | 9  | 12  | 9  | 11 | 8  | 6  | 3  | 7  | 9  | 4  | 2  | 4  | 1  | 7  | 4  | 6  | 8  | 7  | 5  | 13 | 9  | 8  | 11  | 6  | 5  | 4  |    |
| ENSP00000268099                  | ENSG000000140497 | SCAMP2   | 17   | 1  | 0  | 0  | 1  | 1   | 0  | 1  | 3  | 0  | 0  | 1  | 0  | 0  | 0  | 1  | 0  | 0  | 0  | 0  | 1  | 0  | 2  | 1  | 1  | 0  | 1   | 0  | 0  | 1  |    |
| ENSP00000268124                  | ENSG000000140521 | POLG     | 26   | 0  | 0  | 0  | 1  | 1   | 0  | 1  | 0  | 1  | 2  | 4  | 1  | 0  | 0  | 1  | 1  | 3  | 1  | 0  | 1  | 1  | 0  | 2  | 2  | 1  | 0   | 1  | 0  | 0  |    |
| ENSP00000268182                  | ENSG000000140575 | IQGAP1   | 1716 | 68 | 54 | 40 | 51 | 81  | 79 | 65 | 41 | 75 | 18 | 72 | 26 | 45 | 25 | 46 | 57 | 58 | 51 | 51 | 53 | 47 | 51 | 94 | 65 | 87 | 107 | 74 | 38 | 56 |    |
| ENSP00000268220                  | ENSG000000140612 | SEC11A   | 52   | 4  | 1  | 0  | 2  | 4   | 1  | 1  | 1  | 2  | 2  | 1  | 1  | 0  | 2  | 3  | 2  | 1  | 3  | 3  | 1  | 1  | 4  | 2  | 1  | 2  | 1   | 1  | 2  | 2  |    |
| ENSP00000268251,ENSP000000183044 | ENSG000000183044 | ABAT     | 23   | 1  | 3  | 2  | 0  | 0   | 0  | 0  | 0  | 0  | 1  | 0  | 0  | 2  | 1  | 4  | 0  | 0  | 0  | 0  | 0  | 0  | 0  | 0  | 0  | 4  | 1   | 3  | 0  | 0  |    |
| ENSP00000268261                  | ENSG000000140650 | PM22     | 137  | 6  | 6  | 3  | 5  | 5   | 5  | 8  | 6  | 5  | 2  | 2  | 2  | 2  | 3  | 5  | 2  | 4  | 3  | 6  | 4  | 3  | 3  | 6  | 4  | 4  | 8   | 6  | 8  | 5  |    |
| ENSP00000268349,ENSP000000140718 | ENSG000000140718 | FTO      | 41   | 3  | 3  | 2  | 1  | 1   | 1  | 3  | 0  | 1  | 0  | 0  | 1  | 0  | 0  | 1  | 2  | 3  | 3  | 1  | 5  | 0  | 1  | 2  | 1  | 2  | 1   | 2  | 0  | 0  |    |
| ENSP00000268379                  | ENSG000000140740 | UQCRC2   | 350  | 14 | 7  | 11 | 11 | 17  | 9  | 10 | 5  | 6  | 9  | 16 | 6  | 11 | 4  | 6  | 15 | 16 | 12 | 11 | 13 | 9  | 16 | 16 | 13 | 18 | 17  | 11 | 9  | 21 |    |
| ENSP00000268482                  | ENSG000000140829 | DHX38    | 155  | 10 | 4  | 8  | 5  | 3   | 3  | 6  | 4  | 4  | 2  | 9  | 0  | 2  | 3  | 2  | 5  | 5  | 5  | 4  | 2  | 3  | 8  | 14 | 5  | 4  | 11  | 2  | 11 | 4  |    |
| ENSP00000268605                  | ENSG000000140939 | NOL3     | 29   | 1  | 0  | 0  | 1  | 0   | 0  | 0  | 1  | 2  | 0  | 0  | 0  | 0  | 1  | 0  | 1  | 2  | 2  | 2  | 1  | 3  | 0  | 0  | 0  | 0  | 3   | 5  | 1  | 2  |    |
| ENSP00000268638                  | ENSG000000140968 | IRF8     | 13   | 0  | 2  | 0  | 2  | 1   | 0  | 0  | 1  | 0  | 0  | 0  | 0  | 0  | 1  | 0  | 1  | 0  | 1  | 0  | 0  | 0  | 1  | 0  | 0  | 2  | 1   | 0  | 0  | 0  |    |
| ENSP00000268668                  | ENSG000000140990 | NDUFB10  | 199  | 7  | 7  | 3  | 6  | 6</ |    |    |    |    |    |    |    |    |    |    |    |    |    |    |    |    |    |    |    |    |     |    |    |    |    |

|                                 |                 |         |     |    |    |    |    |    |    |    |    |    |    |    |    |    |    |    |    |    |    |    |    |    |    |    |    |    |    |    |    |    |    |   |
|---------------------------------|-----------------|---------|-----|----|----|----|----|----|----|----|----|----|----|----|----|----|----|----|----|----|----|----|----|----|----|----|----|----|----|----|----|----|----|---|
| ENSP00000271620                 | ENSG00000143363 | PRUNE   | 36  | 0  | 2  | 3  | 3  | 5  | 4  | 2  | 0  | 1  | 0  | 0  | 0  | 1  | 0  | 0  | 0  | 1  | 1  | 3  | 1  | 0  | 0  | 1  | 0  | 3  | 1  | 1  | 2  | 0  | 1  |   |
| ENSP00000271628                 | ENSG00000143368 | SF3B4   | 70  | 4  | 3  | 2  | 2  | 3  | 3  | 1  | 2  | 1  | 2  | 5  | 1  | 4  | 2  | 2  | 2  | 2  | 1  | 3  | 2  | 3  | 2  | 3  | 2  | 2  | 2  | 2  | 2  | 4  | 1  |   |
| ENSP00000271636                 | ENSG00000143375 | CGN     | 283 | 37 | 22 | 29 | 16 | 10 | 9  | 18 | 6  | 11 | 0  | 0  | 0  | 10 | 10 | 11 | 0  | 3  | 2  | 11 | 16 | 14 | 14 | 14 | 2  | 2  | 1  | 0  | 1  | 0  |    |   |
| ENSP00000271638                 | ENSG00000163191 | S100A11 | 151 | 3  | 4  | 2  | 1  | 10 | 10 | 3  | 4  | 9  | 2  | 10 | 4  | 2  | 2  | 3  | 6  | 1  | 7  | 1  | 4  | 4  | 3  | 5  | 8  | 5  | 7  | 6  | 6  | 13 | 6  |   |
| ENSP00000271640,ENSP00000143379 | ENSG00000143379 | SETDB1  | 34  | 2  | 0  | 0  | 3  | 1  | 1  | 2  | 1  | 0  | 1  | 0  | 0  | 1  | 2  | 0  | 2  | 0  | 0  | 2  | 3  | 1  | 1  | 3  | 0  | 1  | 1  | 1  | 3  | 1  | 1  |   |
| ENSP00000271657,ENSP00000143393 | ENSG00000143393 | PI4KB   | 12  | 0  | 0  | 3  | 1  | 0  | 0  | 0  | 0  | 0  | 1  | 0  | 0  | 0  | 0  | 0  | 0  | 0  | 0  | 0  | 2  | 1  | 0  | 0  | 0  | 0  | 0  | 0  | 2  | 0  | 2  |   |
| ENSP00000271732                 | ENSG00000143457 | GOLPH3L | 41  | 1  | 1  | 1  | 2  | 4  | 3  | 3  | 0  | 2  | 0  | 0  | 0  | 1  | 2  | 1  | 1  | 2  | 0  | 1  | 2  | 2  | 1  | 1  | 1  | 2  | 1  | 3  | 1  | 2  | 0  |   |
| ENSP00000271764                 | ENSG00000143486 | LGTN    | 51  | 1  | 0  | 2  | 4  | 3  | 1  | 2  | 2  | 0  | 0  | 0  | 0  | 2  | 1  | 1  | 1  | 3  | 5  | 3  | 2  | 1  | 1  | 0  | 4  | 4  | 0  | 1  | 3  | 3  |    |   |
| ENSP00000271857                 | ENSG00000143554 | SLC27A3 | 20  | 1  | 1  | 1  | 0  | 0  | 0  | 2  | 0  | 1  | 1  | 1  | 0  | 0  | 1  | 0  | 0  | 0  | 0  | 1  | 3  | 0  | 1  | 2  | 1  | 1  | 1  | 0  | 1  | 0  | 0  |   |
| ENSP00000271946,ENSP00000143627 | ENSG00000143627 | PKLR    | 210 | 7  | 1  | 5  | 16 | 17 | 6  | 9  | 7  | 5  | 4  | 8  | 2  | 8  | 7  | 4  | 9  | 11 | 4  | 10 | 6  | 5  | 4  | 13 | 6  | 8  | 5  | 2  | 6  | 6  | 7  |   |
| ENSP00000272065                 | ENSG00000143727 | ACP1    | 195 | 6  | 7  | 6  | 10 | 14 | 9  | 5  | 7  | 5  | 2  | 7  | 5  | 5  | 7  | 3  | 6  | 7  | 6  | 8  | 10 | 5  | 3  | 5  | 4  | 8  | 8  | 7  | 7  | 6  | 7  |   |
| ENSP00000272067                 | ENSG00000143727 | ACP1    | 63  | 2  | 2  | 2  | 3  | 3  | 2  | 2  | 3  | 1  | 1  | 1  | 2  | 2  | 4  | 1  | 2  | 3  | 2  | 3  | 3  | 1  | 1  | 2  | 1  | 2  | 4  | 3  | 2  | 1  | 2  |   |
| ENSP00000272167,ENSP00000143819 | ENSG00000143819 | EPHX1   | 194 | 8  | 6  | 3  | 7  | 10 | 11 | 7  | 3  | 11 | 1  | 6  | 4  | 6  | 2  | 8  | 3  | 2  | 7  | 6  | 5  | 10 | 3  | 9  | 9  | 16 | 17 | 9  | 0  | 3  | 2  |   |
| ENSP00000272193,ENSP00000143842 | ENSG00000143842 | SOX13   | 10  | 0  | 1  | 0  | 1  | 0  | 1  | 0  | 0  | 0  | 0  | 0  | 1  | 0  | 1  | 1  | 0  | 1  | 0  | 0  | 0  | 0  | 1  | 1  | 0  | 1  | 0  | 0  | 0  | 0  | 0  |   |
| ENSP00000272217                 | ENSG00000143862 | ARL8A   | 19  | 2  | 1  | 0  | 0  | 0  | 2  | 0  | 0  | 0  | 1  | 3  | 0  | 0  | 0  | 1  | 0  | 0  | 0  | 2  | 0  | 0  | 1  | 2  | 2  | 0  | 1  | 0  | 0  | 0  | 1  |   |
| ENSP00000272227,ENSP00000143870 | ENSG00000143870 | PDI6    | 640 | 34 | 21 | 23 | 16 | 43 | 27 | 21 | 23 | 18 | 17 | 24 | 15 | 18 | 20 | 22 | 16 | 17 | 13 | 14 | 32 | 20 | 16 | 22 | 16 | 29 | 35 | 17 | 21 | 18 | 12 |   |
| ENSP00000272233                 | ENSG00000143878 | RHOB    | 98  | 6  | 6  | 1  | 1  | 0  | 3  | 1  | 0  | 5  | 2  | 9  | 1  | 2  | 1  | 3  | 6  | 5  | 2  | 2  | 2  | 8  | 0  | 4  | 3  | 1  | 7  | 6  | 0  | 7  | 4  |   |
| ENSP00000272252                 | ENSG00000143891 | GALM    | 22  | 1  | 2  | 0  | 2  | 1  | 2  | 1  | 1  | 1  | 0  | 0  | 0  | 1  | 0  | 0  | 1  | 1  | 0  | 1  | 0  | 0  | 0  | 0  | 0  | 1  | 3  | 2  | 0  | 0  | 1  |   |
| ENSP00000272348                 | ENSG00000143977 | SNRPG   | 50  | 3  | 3  | 0  | 0  | 1  | 3  | 2  | 0  | 1  | 0  | 1  | 0  | 4  | 1  | 2  | 2  | 4  | 2  | 2  | 3  | 3  | 0  | 1  | 2  | 2  | 2  | 2  | 1  | 2  | 1  |   |
| ENSP00000272402                 | ENSG00000144021 | CIAO1   | 39  | 2  | 3  | 0  | 2  | 2  | 2  | 1  | 0  | 2  | 0  | 0  | 0  | 1  | 0  | 1  | 2  | 2  | 1  | 1  | 1  | 2  | 0  | 2  | 1  | 1  | 6  | 0  | 1  | 3  | 0  |   |
| ENSP00000272418                 | ENSG00000144029 | MRPS5   | 128 | 4  | 3  | 4  | 10 | 5  | 6  | 5  | 2  | 2  | 2  | 7  | 4  | 4  | 3  | 3  | 5  | 4  | 6  | 5  | 2  | 5  | 3  | 4  | 3  | 2  | 5  | 3  | 4  | 8  | 5  |   |
| ENSP00000272430                 | ENSG00000144993 | RTKN    | 48  | 2  | 1  | 0  | 1  | 0  | 1  | 1  | 1  | 3  | 0  | 4  | 2  | 3  | 1  | 3  | 2  | 0  | 4  | 1  | 3  | 2  | 0  | 2  | 1  | 1  | 2  | 2  | 1  | 2  | 2  |   |
| ENSP00000272519,ENSP00000144118 | ENSG00000144118 | RALB    | 38  | 4  | 3  | 0  | 1  | 1  | 0  | 5  | 0  | 2  | 0  | 2  | 0  | 3  | 0  | 1  | 1  | 2  | 1  | 1  | 0  | 2  | 3  | 2  | 0  | 0  | 2  | 1  | 0  | 1  | 0  |   |
| ENSP00000272638                 | ENSG00000144224 | UBXN4   | 45  | 5  | 1  | 0  | 2  | 1  | 2  | 2  | 0  | 3  | 0  | 8  | 1  | 0  | 0  | 0  | 0  | 1  | 2  | 2  | 2  | 2  | 0  | 1  | 4  | 0  | 2  | 2  | 1  | 2  | 1  |   |
| ENSP00000272645                 | ENSG00000144231 | POLR2D  | 58  | 2  | 2  | 2  | 0  | 0  | 3  | 3  | 1  | 0  | 3  | 2  | 2  | 1  | 0  | 3  | 5  | 2  | 2  | 0  | 4  | 2  | 4  | 2  | 2  | 3  | 1  | 2  | 3  | 1  | 1  |   |
| ENSP00000272716,ENSP00000144290 | ENSG00000144290 | SLC4A10 | 31  | 1  | 2  | 2  | 2  | 1  | 0  | 1  | 2  | 0  | 1  | 0  | 1  | 1  | 2  | 1  | 0  | 2  | 0  | 1  | 0  | 1  | 1  | 2  | 1  | 1  | 1  | 2  | 1  | 0  | 1  |   |
| ENSP00000272793                 | ENSG00000144357 | UBR3    | 22  | 1  | 0  | 0  | 0  | 0  | 1  | 2  | 0  | 0  | 1  | 0  | 0  | 0  | 1  | 2  | 1  | 1  | 0  | 0  | 1  | 1  | 1  | 0  | 0  | 3  | 1  | 0  | 1  | 3  | 1  |   |
| ENSP00000272895                 | ENSG00000144452 | ABCA12  | 10  | 0  | 0  | 1  | 1  | 1  | 0  | 0  | 0  | 2  | 1  | 0  | 0  | 0  | 0  | 0  | 0  | 1  | 0  | 0  | 2  | 2  | 0  | 0  | 1  | 0  | 0  | 0  | 0  | 0  | 0  |   |
| ENSP00000273037                 | ENSG00000144559 | C3orf31 | 31  | 2  | 0  | 0  | 1  | 0  | 2  | 2  | 0  | 0  | 1  | 2  | 1  | 2  | 1  | 1  | 2  | 0  | 1  | 1  | 1  | 1  | 0  | 2  | 2  | 0  | 2  | 0  | 0  | 3  | 1  |   |
| ENSP00000273047                 | ENSG00000144566 | RAB5A   | 109 | 9  | 3  | 1  | 2  | 3  | 3  | 2  | 4  | 4  | 0  | 6  | 2  | 7  | 0  | 4  | 1  | 2  | 5  | 3  | 3  | 4  | 0  | 5  | 5  | 4  | 8  | 4  | 2  | 9  | 4  |   |
| ENSP00000273062                 | ENSG00000144579 | CTDSP1  | 18  | 0  | 0  | 0  | 1  | 0  | 1  | 1  | 0  | 0  | 0  | 1  | 1  | 0  | 0  | 1  | 1  | 1  | 1  | 0  | 1  | 0  | 1  | 1  | 1  | 2  | 1  | 0  | 1  | 0  | 0  |   |
| ENSP00000273064                 | ENSG00000144580 | RQCD1   | 45  | 2  | 2  | 1  | 4  | 2  | 2  | 3  | 1  | 1  | 1  | 0  | 2  | 0  | 1  | 1  | 0  | 1  | 1  | 3  | 3  | 2  | 1  | 3  | 1  | 0  | 1  | 1  | 1  | 1  | 3  |   |
| ENSP00000273130                 | ENSG00000144635 | DYNC1L1 | 91  | 3  | 2  | 4  | 3  | 1  | 0  | 2  | 0  | 1  | 3  | 3  | 3  | 4  | 5  | 3  | 3  | 4  | 2  | 2  | 3  | 7  | 2  | 2  | 1  | 4  | 2  | 3  | 5  | 8  | 6  |   |
| ENSP00000273221                 | ENSG00000144711 | IQSEC1  | 36  | 0  | 1  | 1  | 1  | 2  | 1  | 2  | 0  | 2  | 1  | 2  | 1  | 1  | 2  | 2  | 1  | 1  | 1  | 3  | 2  | 1  | 1  | 1  | 1  | 0  | 1  | 1  | 2  | 1  | 0  |   |
| ENSP00000273258                 | ENSG00000144746 | ARL6IP5 | 108 | 4  | 6  | 1  | 1  | 3  | 3  | 2  | 2  | 7  | 0  | 4  | 1  | 2  | 0  | 6  | 4  | 3  | 4  | 2  | 3  | 5  | 2  | 7  | 8  | 6  | 7  | 6  | 2  | 4  | 3  |   |
| ENSP00000273308                 | ENSG00000144785 | CNPY2   | 212 | 10 | 6  | 5  | 5  | 5  | 3  | 6  | 6  | 7  | 6  | 11 | 7  | 2  | 10 | 7  | 5  | 7  | 3  | 9  | 7  | 9  | 9  | 13 | 6  | 8  | 7  | 7  | 9  | 12 | 5  |   |
| ENSP00000273356                 | ENSG00000144824 | PHLDB2  | 68  | 10 | 1  | 6  | 0  | 1  | 0  | 0  | 0  | 0  | 6  | 6  | 6  | 4  | 3  | 2  | 3  | 3  | 2  | 2  | 4  | 1  | 2  | 2  | 0  | 0  | 1  | 1  | 0  | 1  | 1  |   |
| ENSP00000273359                 | ENSG00000144827 | ABHD10  | 139 | 4  | 2  | 1  | 4  | 4  | 3  | 3  | 3  | 4  | 2  | 7  | 3  | 2  | 1  | 3  | 8  | 11 | 8  | 9  | 4  | 3  | 3  | 11 | 5  | 6  | 7  | 3  | 3  | 7  | 4  |   |
| ENSP00000273398                 | ENSG00000145753 | ATP6V1A | 233 | 11 | 9  | 4  | 9  | 8  | 8  | 4  | 11 | 1  | 10 | 6  | 10 | 3  | 6  | 8  | 8  | 6  | 10 | 11 | 7  | 1  | 5  | 3  | 16 | 15 | 11 | 7  | 12 | 5  |    |   |
| ENSP00000273406                 | ENSG00000144867 | SRPRB   | 240 | 11 | 6  | 11 | 8  | 15 | 9  | 8  | 10 | 6  | 5  | 12 | 8  | 7  | 8  | 7  | 7  | 8  | 5  | 7  | 11 | 4  | 6  | 10 | 5  | 9  | 9  | 7  | 8  | 7  | 6  |   |
| ENSP00000273432                 | ENSG00000144893 | MED12L  | 10  | 0  | 0  | 1  | 0  | 0  | 0  | 0  | 1  | 2  | 0  | 0  | 0  | 2  | 0  | 0  | 0  | 0  | 0  | 0  | 0  | 0  | 1  | 3  | 0  | 0  | 0  | 0  | 0  | 0  | 0  |   |
| ENSP00000273512                 | ENSG00000144959 | AADACL1 | 100 | 2  | 4  | 1  | 4  | 4  | 5  | 3  | 4  | 2  | 4  | 5  | 3  | 3  | 2  | 7  | 2  | 3  | 5  | 0  | 4  | 5  | 4  | 5  | 3  | 5  | 5  | 2  | 1  | 3  | 0  |   |
| ENSP00000273541,ENSP00000145002 | ENSG00000145002 | FTH1    | 32  | 2  | 1  | 0  | 1  | 0  | 0  | 2  | 0  | 3  | 2  | 1  | 1  | 2  | 0  | 0  | 0  | 1  | 0  | 1  | 2  | 2  | 0  | 2  | 2  | 2  | 0  | 2  | 2  | 2  | 2  |   |
| ENSP00000273550,ENSP00000167996 | ENSG00000167996 | FTH1    | 72  | 0  | 0  | 0  | 1  | 0  | 1  | 2  | 0  | 0  | 1  | 4  | 5  | 1  | 0  | 2  | 7  | 5  | 4  | 3  | 2  | 3  | 2  | 5  | 2  | 2  | 4  | 5  | 4  | 5  | 2  |   |
| ENSP00000273628                 | ENSG00000145050 | MANF    | 307 | 10 | 8  | 11 | 14 | 15 | 14 | 6  | 7  | 6  | 10 | 10 | 9  | 12 | 13 | 16 | 6  | 9  | 8  | 11 | 14 | 13 | 14 | 11 | 7  | 10 | 11 | 8  | 10 | 10 | 6  |   |
| ENSP00000273783                 | ENSG00000145191 | EIF2B5  | 18  | 2  | 2  | 0  | 0  | 0  | 2  | 1  | 0  | 1  | 0  | 1  | 0  | 0  | 0  | 2  | 1  | 1  | 0  | 0  | 0  | 2  | 0  | 0  | 0  | 0  | 1  | 0  | 0  | 0  | 2  |   |
| ENSP00000273784                 | ENSG00000145192 | AHSG    | 12  | 3  | 3  | 1  | 0  | 0  | 1  | 1  | 0  | 0  | 0  | 0  | 0  | 0  | 1  | 0  | 0  | 0  | 0  | 0  | 0  | 0  | 0  | 1  | 0  | 1  | 0  | 0  | 0  | 0  | 0  |   |
| ENSP00000273853                 | ENSG00000145241 | CENPC1  | 17  | 1  | 0  | 1  | 2  | 1  | 0  | 2  | 1  | 1  | 1  | 0  | 2  | 0  | 0  | 0  | 0  | 0  | 1  | 0  | 0  | 0  | 0  | 3  | 0  | 0  | 0  | 0  | 1  | 0  | 0  |   |
| ENSP00000273920                 | ENSG00000145293 | ENOPH1  | 102 | 6  | 3  | 1  | 4  | 6  | 3  | 3  | 2  | 6  | 0  | 3  | 2  | 3  | 0  | 4  | 4  | 4  | 4  | 4  | 3  | 3  | 1  | 5  | 2  | 6  | 7  | 5  | 2  | 2  | 3  |   |
| ENSP00000273986                 | ENSG00000145354 | CISD2   | 53  | 2  | 1  | 2  | 1  | 2  | 1  | 3  | 2  | 1  | 1  | 2  | 2  | 2  | 1  | 2  | 2  | 3  | 1  | 1  | 3  | 1  | 2  | 2  | 1  | 3  | 1  | 1  | 3  | 2  | 2  |   |
| ENSP00000274000                 | ENSG00000138660 | AP1AR   | 12  | 1  | 0  | 0  | 1  | 1  | 0  | 0  | 2  | 0  | 0  | 0  | 1  | 0  | 1  | 1  | 0  | 1  | 0  | 2  | 0  | 0  | 0  | 0  | 1  | 0  | 0  | 0  | 0  | 0  | 0  | 0 |
| ENSP00000274008                 | ENSG00000145375 | SPATA5  | 28  | 1  | 0  | 0  | 3  | 0  | 2  | 1  | 0  |    |    |    |    |    |    |    |    |    |    |    |    |    |    |    |    |    |    |    |    |    |    |   |





|                                            |                  |          |      |     |    |     |    |     |    |     |    |    |    |     |    |    |    |    |    |     |    |    |     |    |    |     |    |     |     |    |    |     |    |   |
|--------------------------------------------|------------------|----------|------|-----|----|-----|----|-----|----|-----|----|----|----|-----|----|----|----|----|----|-----|----|----|-----|----|----|-----|----|-----|-----|----|----|-----|----|---|
| ENSP00000288266                            | ENSG00000157500  | APPL1    | 39   | 1   | 1  | 2   | 1  | 1   | 4  | 1   | 1  | 1  | 2  | 2   | 1  | 1  | 0  | 2  | 0  | 1   | 0  | 3  | 1   | 2  | 1  | 0   | 0  | 2   | 3   | 1  | 1  | 2   | 1  |   |
| ENSP00000288274,ENSP000000:ENSG00000157514 |                  | TSC22D3  | 26   | 2   | 1  | 0   | 2  | 1   | 1  | 2   | 0  | 1  | 0  | 1   | 1  | 2  | 0  | 1  | 0  | 0   | 2  | 1  | 0   | 2  | 0  | 0   | 1  | 0   | 0   | 0  | 0  | 4   | 1  |   |
| ENSP00000288344,ENSP000000:ENSG00000205581 |                  | HMGN1    | 154  | 10  | 3  | 9   | 3  | 3   | 1  | 5   | 9  | 2  | 5  | 9   | 4  | 1  | 5  | 5  | 2  | 6   | 2  | 3  | 10  | 5  | 6  | 8   | 6  | 8   | 4   | 3  | 5  | 5   | 7  |   |
| ENSP00000288398,ENSP000000:ENSG00000140416 |                  | TPM1     | 530  | 30  | 20 | 30  | 19 | 21  | 8  | 23  | 16 | 12 | 5  | 4   | 5  | 25 | 41 | 31 | 10 | 13  | 8  | 12 | 23  | 9  | 24 | 22  | 14 | 29  | 30  | 17 | 8  | 11  | 10 |   |
| ENSP00000288532                            | ENSG00000110871  | COG5     | 19   | 1   | 0  | 0   | 1  | 1   | 0  | 1   | 2  | 1  | 0  | 1   | 1  | 0  | 0  | 0  | 0  | 0   | 0  | 0  | 1   | 0  | 0  | 2   | 2  | 0   | 3   | 1  | 0  | 1   | 0  |   |
| ENSP00000288757                            | ENSG00000157895  | C12orf43 | 45   | 1   | 3  | 2   | 1  | 3   | 1  | 0   | 1  | 1  | 1  | 1   | 1  | 1  | 2  | 2  | 1  | 1   | 2  | 0  | 1   | 1  | 2  | 2   | 3  | 2   | 0   | 1  | 2  | 3   | 3  |   |
| ENSP00000288937                            | ENSG00000158042  | MRPL17   | 54   | 3   | 1  | 2   | 3  | 3   | 2  | 3   | 0  | 3  | 0  | 2   | 1  | 1  | 2  | 2  | 1  | 2   | 2  | 2  | 2   | 1  | 1  | 2   | 2  | 3   | 2   | 1  | 1  | 2   |    |   |
| ENSP00000288986                            | ENSG00000158092  | NCK1     | 21   | 1   | 0  | 1   | 2  | 2   | 0  | 1   | 0  | 0  | 0  | 0   | 0  | 1  | 0  | 1  | 2  | 0   | 1  | 2  | 1   | 1  | 1  | 2   | 0  | 0   | 0   | 0  | 2  | 0   | 0  |   |
| ENSP00000289094                            | ENSG00000114098  | ARMC8    | 50   | 2   | 2  | 0   | 1  | 2   | 3  | 2   | 0  | 0  | 0  | 0   | 0  | 1  | 2  | 2  | 2  | 2   | 3  | 3  | 3   | 3  | 0  | 1   | 0  | 3   | 2   | 1  | 2  | 4   | 2  |   |
| ENSP00000289153                            | ENSG000000051382 | PIK3CB   | 31   | 1   | 1  | 0   | 2  | 3   | 3  | 3   | 0  | 3  | 0  | 0   | 0  | 0  | 1  | 1  | 1  | 0   | 1  | 1  | 1   | 1  | 2  | 0   | 0  | 1   | 3   | 0  | 1  | 1   | 0  | 0 |
| ENSP00000289175                            | ENSG00000124831  | LRRFIP1  | 336  | 6   | 5  | 8   | 9  | 8   | 8  | 12  | 22 | 14 | 8  | 7   | 7  | 9  | 15 | 16 | 6  | 8   | 11 | 11 | 15  | 8  | 11 | 18  | 6  | 16  | 25  | 13 | 10 | 10  | 14 |   |
| ENSP00000289228                            | ENSG00000115073  | ACTR1B   | 154  | 4   | 3  | 2   | 5  | 7   | 4  | 3   | 1  | 5  | 4  | 7   | 3  | 5  | 7  | 6  | 4  | 6   | 5  | 5  | 10  | 8  | 2  | 3   | 1  | 7   | 9   | 6  | 5  | 8   | 9  |   |
| ENSP00000289290,ENSP000000:ENSG00000102024 |                  | PLS3     | 495  | 40  | 34 | 29  | 19 | 24  | 18 | 14  | 6  | 10 | 3  | 8   | 3  | 17 | 11 | 21 | 13 | 25  | 17 | 20 | 12  | 12 | 4  | 7   | 7  | 16  | 22  | 9  | 23 | 28  | 23 |   |
| ENSP00000289371                            | ENSG00000158417  | EIF5B    | 421  | 19  | 15 | 9   | 8  | 10  | 4  | 17  | 8  | 14 | 4  | 17  | 7  | 16 | 9  | 15 | 14 | 19  | 20 | 17 | 21  | 15 | 9  | 17  | 11 | 18  | 25  | 21 | 12 | 17  | 13 |   |
| ENSP00000289416                            | ENSG00000005187  | ACSM3    | 23   | 0   | 0  | 0   | 0  | 0   | 0  | 4   | 4  | 6  | 0  | 0   | 0  | 0  | 0  | 0  | 0  | 1   | 0  | 0  | 0   | 0  | 0  | 1   | 0  | 2   | 1   | 3  | 1  | 0   | 0  |   |
| ENSP00000289509                            | ENSG00000158545  | ZC3H18   | 32   | 2   | 2  | 1   | 2  | 1   | 0  | 1   | 3  | 2  | 1  | 0   | 0  | 2  | 0  | 0  | 0  | 0   | 0  | 1  | 0   | 0  | 4  | 2   | 3  | 0   | 3   | 1  | 0  | 1   | 0  |   |
| ENSP00000289577                            | ENSG00000158604  | TMED4    | 84   | 3   | 2  | 3   | 2  | 2   | 1  | 2   | 3  | 4  | 0  | 0   | 2  | 2  | 2  | 2  | 2  | 2   | 6  | 3  | 3   | 4  | 4  | 4   | 4  | 6   | 2   | 5  | 5  | 0   | 3  | 1 |
| ENSP00000289893                            | ENSG00000127603  | MACF1    | 746  | 31  | 15 | 21  | 47 | 34  | 25 | 22  | 12 | 14 | 11 | 38  | 21 | 26 | 11 | 28 | 26 | 35  | 26 | 29 | 24  | 26 | 9  | 13  | 4  | 21  | 20  | 10 | 43 | 62  | 42 |   |
| ENSP00000289968                            | ENSG00000140750  | ARHGAP1  | 36   | 3   | 4  | 3   | 3  | 3   | 0  | 0   | 0  | 0  | 0  | 0   | 0  | 2  | 1  | 1  | 1  | 1   | 2  | 1  | 0   | 1  | 2  | 0   | 2  | 0   | 1   | 2  | 2  | 0   | 0  |   |
| ENSP00000290155                            | ENSG00000159079  | C21orf59 | 18   | 1   | 0  | 0   | 1  | 0   | 0  | 0   | 0  | 1  | 0  | 1   | 0  | 0  | 0  | 0  | 1  | 1   | 0  | 1  | 2   | 1  | 0  | 1   | 0  | 0   | 1   | 0  | 1  | 3   | 2  |   |
| ENSP00000290158                            | ENSG00000108424  | KPNB1    | 515  | 41  | 25 | 18  | 4  | 10  | 15 | 12  | 5  | 15 | 4  | 22  | 15 | 18 | 7  | 23 | 19 | 14  | 23 | 12 | 20  | 23 | 9  | 13  | 13 | 16  | 29  | 19 | 23 | 33  | 15 |   |
| ENSP00000290216,ENSP000000:ENSG00000141295 |                  | SCRN2    | 51   | 2   | 3  | 3   | 3  | 2   | 2  | 0   | 0  | 0  | 0  | 1   | 0  | 0  | 0  | 1  | 3  | 2   | 4  | 1  | 0   | 0  | 0  | 1   | 0  | 4   | 5   | 2  | 2  | 6   | 4  |   |
| ENSP00000290231                            | ENSG00000124160  | NCOA5    | 178  | 6   | 5  | 6   | 8  | 7   | 4  | 4   | 9  | 4  | 10 | 8   | 8  | 4  | 7  | 5  | 3  | 6   | 5  | 6  | 8   | 4  | 8  | 9   | 6  | 6   | 7   | 4  | 5  | 3   | 3  |   |
| ENSP00000290246,ENSP000000:ENSG00000062598 |                  | ELMO2    | 11   | 0   | 1  | 0   | 0  | 0   | 0  | 0   | 0  | 0  | 0  | 0   | 1  | 0  | 0  | 0  | 0  | 0   | 0  | 3  | 0   | 1  | 1  | 0   | 1  | 0   | 0   | 0  | 0  | 2   | 1  |   |
| ENSP00000290299                            | ENSG00000159186  | AC007383 | 137  | 8   | 6  | 3   | 0  | 6   | 4  | 2   | 4  | 3  | 1  | 8   | 2  | 1  | 0  | 2  | 2  | 2   | 6  | 4  | 2   | 5  | 3  | 13  | 9  | 6   | 8   | 7  | 4  | 14  | 2  |   |
| ENSP00000290330                            | ENSG00000159210  | SNF8     | 59   | 4   | 5  | 4   | 2  | 4   | 2  | 2   | 1  | 3  | 0  | 0   | 1  | 0  | 2  | 1  | 1  | 1   | 1  | 3  | 1   | 2  | 1  | 0   | 4  | 1   | 3   | 2  | 2  | 0   | 3  | 3 |
| ENSP00000290341                            | ENSG00000159217  | IGF2BP1  | 107  | 36  | 26 | 26  | 0  | 0   | 0  | 0   | 0  | 0  | 1  | 4   | 5  | 7  | 0  | 0  | 0  | 0   | 0  | 0  | 1   | 0  | 0  | 0   | 0  | 0   | 0   | 0  | 0  | 1   | 0  | 0 |
| ENSP00000290349                            | ENSG00000159228  | CBR1     | 198  | 6   | 5  | 3   | 2  | 10  | 10 | 8   | 3  | 7  | 1  | 9   | 4  | 5  | 0  | 3  | 0  | 0   | 0  | 3  | 11  | 9  | 1  | 11  | 7  | 17  | 17  | 11 | 9  | 16  | 10 |   |
| ENSP00000290354                            | ENSG00000159231  | CBR3     | 91   | 3   | 1  | 2   | 2  | 5   | 4  | 3   | 3  | 3  | 0  | 1   | 4  | 3  | 0  | 1  | 0  | 0   | 1  | 2  | 5   | 3  | 1  | 7   | 3  | 9   | 7   | 5  | 4  | 4   | 5  |   |
| ENSP00000290377                            | ENSG00000159247  | TUBBP5   | 292  | 7   | 5  | 14  | 10 | 29  | 9  | 11  | 5  | 6  | 9  | 5   | 5  | 6  | 18 | 6  | 6  | 13  | 8  | 6  | 12  | 6  | 11 | 11  | 7  | 19  | 10  | 5  | 13 | 11  | 9  |   |
| ENSP00000290378,ENSP000000:ENSG00000107796 |                  | ACTA2    | 2637 | 110 | 50 | 100 | 77 | 248 | 49 | 103 | 43 | 41 | 42 | 161 | 54 | 48 | 47 | 49 | 98 | 265 | 62 | 45 | 172 | 56 | 65 | 100 | 46 | 120 | 104 | 41 | 76 | 118 | 47 |   |
| ENSP00000290401,ENSP000000:ENSG00000156642 |                  | NPTN     | 30   | 0   | 2  | 0   | 0  | 0   | 0  | 3   | 1  | 1  | 0  | 0   | 0  | 2  | 4  | 4  | 1  | 1   | 3  | 2  | 0   | 2  | 1  | 1   | 2  | 0   | 1   | 2  | 0  | 0   | 1  |   |
| ENSP00000290429                            | ENSG00000100294  | MCAT     | 21   | 0   | 1  | 1   | 0  | 1   | 3  | 0   | 1  | 0  | 2  | 1   | 0  | 0  | 0  | 0  | 1  | 1   | 0  | 0  | 1   | 1  | 1  | 0   | 1  | 1   | 0   | 0  | 1  | 2   | 1  |   |
| ENSP00000290524,ENSP000000:ENSG00000143390 |                  | RFX5     | 11   | 1   | 0  | 0   | 0  | 0   | 0  | 0   | 1  | 0  | 1  | 0   | 0  | 0  | 0  | 0  | 0  | 0   | 0  | 0  | 0   | 1  | 1  | 0   | 2  | 0   | 2   | 0  | 0  | 1   | 2  |   |
| ENSP00000290541                            | ENSG00000159377  | PSMB4    | 153  | 4   | 8  | 0   | 1  | 1   | 3  | 4   | 4  | 1  | 11 | 1   | 14 | 4  | 6  | 1  | 2  | 7   | 5  | 2  | 1   | 2  | 7  | 2   | 4  | 4   | 5   | 14 | 10 | 2   | 20 | 7 |
| ENSP00000290573,ENSP000000:ENSG00000159399 |                  | HK2      | 205  | 6   | 5  | 1   | 3  | 3   | 6  | 4   | 2  | 2  | 0  | 5   | 0  | 13 | 4  | 11 | 6  | 5   | 9  | 9  | 11  | 12 | 4  | 9   | 5  | 6   | 16  | 9  | 11 | 17  | 11 |   |
| ENSP00000290649                            | ENSG00000159461  | AMFR     | 22   | 1   | 0  | 0   | 1  | 1   | 2  | 3   | 0  | 0  | 0  | 1   | 0  | 4  | 0  | 0  | 0  | 0   | 1  | 2  | 0   | 2  | 0  | 1   | 0  | 1   | 1   | 0  | 1  | 0   | 0  |   |
| ENSP00000290650                            | ENSG00000159459  | UBR1     | 28   | 1   | 1  | 0   | 1  | 1   | 4  | 3   | 1  | 3  | 0  | 1   | 0  | 0  | 0  | 0  | 1  | 0   | 0  | 0  | 1   | 0  | 0  | 2   | 1  | 0   | 1   | 1  | 0  | 2   | 3  |   |
| ENSP00000290663,ENSP000000:ENSG00000159479 |                  | MED8     | 15   | 4   | 0  | 0   | 1  | 0   | 0  | 0   | 1  | 0  | 1  | 2   | 0  | 0  | 0  | 0  | 0  | 1   | 0  | 0  | 1   | 0  | 1  | 1   | 0  | 1   | 0   | 0  | 1  | 0   | 0  |   |
| ENSP00000290704                            | ENSG00000187193  | MT1X     | 10   | 0   | 0  | 0   | 0  | 0   | 1  | 0   | 0  | 0  | 0  | 0   | 0  | 0  | 0  | 0  | 0  | 0   | 0  | 0  | 0   | 0  | 0  | 0   | 0  | 0   | 0   | 0  | 2  | 2   | 3  |   |
| ENSP00000290846,ENSP000000:ENSG00000100416 |                  | TRMU     | 13   | 0   | 1  | 0   | 0  | 0   | 0  | 0   | 1  | 0  | 0  | 0   | 0  | 0  | 0  | 0  | 1  | 2   | 0  | 0  | 0   | 2  | 0  | 0   | 0  | 1   | 1   | 1  | 1  | 0   | 0  | 2 |
| ENSP00000290858                            | ENSG00000067955  | CBFB     | 101  | 3   | 2  | 4   | 4  | 4   | 3  | 2   | 1  | 2  | 5  | 5   | 3  | 3  | 6  | 2  | 2  | 2   | 0  | 2  | 10  | 1  | 2  | 3   | 3  | 2   | 4   | 6  | 1  | 7   | 6  | 4 |
| ENSP00000290913,ENSP000000:ENSG00000159685 |                  | CHCHD6   | 15   | 0   | 0  | 0   | 1  | 1   | 0  | 0   | 2  | 0  | 1  | 2   | 0  | 0  | 0  | 0  | 0  | 1   | 0  | 0  | 0   | 0  | 1  | 1   | 0  | 0   | 2   | 0  | 1  | 2   | 0  |   |
| ENSP00000290949                            | ENSG00000159720  | ATP6V0D1 | 80   | 5   | 5  | 3   | 4  | 6   | 2  | 4   | 3  | 2  | 1  | 3   | 3  | 1  | 2  | 1  | 2  | 3   | 2  | 1  | 2   | 2  | 1  | 1   | 2  | 5   | 5   | 5  | 1  | 2   | 1  |   |
| ENSP00000291041                            | ENSG00000159792  | PSKH1    | 12   | 0   | 1  | 0   | 0  | 1   | 0  | 0   | 0  | 0  | 0  | 0   | 0  | 0  | 1  | 0  | 0  | 0   | 0  | 0  | 0   | 0  | 0  | 2   | 7  | 0   | 0   | 0  | 0  | 0   | 0  |   |
| ENSP00000291107,ENSP000000:ENSG00000159842 |                  | ABR      | 77   | 1   | 3  | 1   | 5  | 6   | 4  | 4   | 3  | 4  | 0  | 1   | 0  | 3  | 0  | 3  | 1  | 2   | 1  | 1  | 1   | 2  | 0  | 6   | 4  | 3   | 8   | 2  | 0  | 3   | 5  |   |
| ENSP00000291281                            | ENSG00000105287  | PRKD2    | 70   | 0   | 0  | 0   | 1  | 0   | 0  | 1   | 0  | 2  | 0  | 0   | 0  | 0  | 0  | 0  | 0  | 2   | 1  | 2  | 0   | 0  | 0  | 0   | 0  | 0   | 0   | 0  | 0  | 1   | 0  | 0 |
| ENSP00000291295,ENSP000000:ENSG00000143933 |                  | CALM2    | 772  | 45  | 23 | 19  | 20 | 22  | 22 | 24  | 29 | 23 | 7  | 33  | 13 | 22 | 16 | 33 | 22 | 29  | 19 | 29 | 32  | 30 | 17 | 32  | 23 | 39  | 42  | 28 | 19 | 36  | 24 |   |
| ENSP00000291386                            | ENSG00000160075  | SSU72    | 52   | 3   | 1  | 1   | 2  | 2   | 1  | 2   | 1  | 2  | 0  | 2   | 1  | 2  | 2  | 1  | 2  | 4   | 1  | 3  | 2   | 1  | 1  | 1   | 2  | 0   | 3   | 4  | 1  | 1   | 2  | 2 |
| ENSP00000291439                            | ENSG00000072958  | AP1M1    | 29   | 3   | 5  | 1   | 1  | 0   | 1  | 1   | 0  | 0  | 0  | 0   | 0  | 0  | 0  | 0  | 2  | 0   | 1  | 2  | 0   | 2  | 1  | 1   | 3  | 0   | 0   | 2  | 0  | 1   | 1  | 1 |
| ENSP00000291442                            | ENSG00000160113  | NR2F6    | 15   | 2   | 1  | 0   | 1  | 0   | 1  | 2   | 0  | 0  | 0  | 0   | 0  | 1  |    |    |    |     |    |    |     |    |    |     |    |     |     |    |    |     |    |   |

|                            |                 |          |      |    |    |    |    |    |    |    |    |    |    |    |    |    |    |    |    |    |    |    |    |    |    |    |    |    |    |    |    |    |    |   |
|----------------------------|-----------------|----------|------|----|----|----|----|----|----|----|----|----|----|----|----|----|----|----|----|----|----|----|----|----|----|----|----|----|----|----|----|----|----|---|
| ENSP00000293760            | ENSG00000161904 | LEMD2    | 58   | 3  | 1  | 1  | 2  | 1  | 0  | 4  | 5  | 2  | 3  | 4  | 0  | 0  | 1  | 2  | 2  | 6  | 2  | 4  | 2  | 2  | 2  | 0  | 1  | 1  | 0  | 1  | 3  | 1  |    |   |
| ENSP00000293774            | ENSG00000170477 | KRT4     | 216  | 4  | 4  | 2  | 2  | 9  | 5  | 2  | 5  | 14 | 2  | 24 | 15 | 5  | 1  | 9  | 4  | 4  | 13 | 1  | 6  | 6  | 15 | 29 | 20 | 1  | 3  | 6  | 0  | 5  |    |   |
| ENSP00000293804            | ENSG00000161939 | C17orf49 | 36   | 1  | 0  | 0  | 2  | 2  | 3  | 0  | 0  | 0  | 2  | 3  | 0  | 1  | 5  | 1  | 0  | 0  | 2  | 3  | 2  | 1  | 1  | 2  | 0  | 1  | 1  | 0  | 2  | 1  | 0  |   |
| ENSP00000293831,ENSP000001 | ENSG00000161960 | EIF4A1   | 1155 | 57 | 28 | 33 | 22 | 46 | 31 | 37 | 13 | 25 | 11 | 48 | 20 | 37 | 29 | 36 | 43 | 48 | 36 | 30 | 61 | 35 | 23 | 43 | 22 | 65 | 62 | 39 | 53 | 67 | 55 |   |
| ENSP00000293842            | ENSG00000161970 | RPL26    | 159  | 10 | 3  | 8  | 3  | 6  | 3  | 3  | 10 | 3  | 5  | 2  | 4  | 1  | 8  | 4  | 0  | 10 | 5  | 3  | 10 | 5  | 4  | 6  | 3  | 6  | 12 | 3  | 9  | 5  | 5  |   |
| ENSP00000293970            | ENSG00000162065 | TBC1D24  | 46   | 1  | 1  | 2  | 2  | 0  | 0  | 3  | 0  | 0  | 0  | 1  | 0  | 1  | 0  | 0  | 0  | 1  | 3  | 4  | 7  | 3  | 1  | 0  | 2  | 0  | 4  | 2  | 0  | 1  | 4  | 3 |
| ENSP00000293981,ENSP000001 | ENSG00000162076 | FLYWCH2  | 45   | 2  | 2  | 1  | 2  | 0  | 2  | 1  | 0  | 0  | 0  | 1  | 0  | 1  | 2  | 2  | 0  | 3  | 2  | 4  | 2  | 2  | 1  | 3  | 0  | 1  | 3  | 1  | 3  | 2  | 2  |   |
| ENSP00000294008            | ENSG00000188827 | TBD12    | 12   | 0  | 1  | 0  | 0  | 0  | 0  | 0  | 0  | 2  | 2  | 0  | 1  | 1  | 0  | 0  | 0  | 1  | 0  | 0  | 1  | 0  | 1  | 0  | 0  | 1  | 0  | 0  | 0  | 0  | 1  |   |
| ENSP00000294129            | ENSG00000213672 | NCKIPSD  | 29   | 0  | 1  | 1  | 1  | 1  | 1  | 0  | 1  | 0  | 0  | 1  | 0  | 0  | 2  | 1  | 2  | 1  | 0  | 1  | 2  | 3  | 1  | 2  | 0  | 0  | 3  | 0  | 1  | 3  | 0  | 0 |
| ENSP00000294168            | ENSG00000162227 | TAF6L    | 14   | 0  | 1  | 1  | 1  | 0  | 0  | 1  | 0  | 1  | 0  | 0  | 1  | 1  | 0  | 1  | 0  | 0  | 0  | 1  | 0  | 0  | 0  | 1  | 0  | 0  | 4  | 0  | 0  | 0  | 0  |   |
| ENSP00000294172            | ENSG00000162231 | NXF1     | 174  | 9  | 9  | 5  | 4  | 2  | 2  | 6  | 1  | 3  | 5  | 12 | 7  | 5  | 4  | 7  | 4  | 4  | 5  | 4  | 4  | 6  | 5  | 17 | 9  | 3  | 6  | 5  | 6  | 7  | 8  |   |
| ENSP00000294179,ENSP000001 | ENSG00000162236 | STX5     | 55   | 2  | 3  | 0  | 2  | 2  | 4  | 2  | 1  | 2  | 0  | 2  | 3  | 1  | 0  | 1  | 0  | 2  | 2  | 3  | 0  | 3  | 0  | 3  | 1  | 5  | 6  | 3  | 2  | 0  | 0  |   |
| ENSP00000294189            | ENSG00000162244 | RPL29    | 45   | 3  | 2  | 2  | 0  | 2  | 2  | 2  | 2  | 1  | 1  | 0  | 1  | 1  | 2  | 3  | 0  | 2  | 1  | 2  | 2  | 3  | 1  | 2  | 0  | 0  | 2  | 2  | 2  | 1  | 1  |   |
| ENSP00000294241,ENSP000001 | ENSG00000162290 | DCP1A    | 38   | 2  | 0  | 3  | 3  | 1  | 1  | 2  | 0  | 0  | 0  | 0  | 0  | 1  | 3  | 1  | 4  | 1  | 2  | 1  | 1  | 1  | 2  | 2  | 2  | 1  | 1  | 0  | 1  | 1  | 1  |   |
| ENSP00000294247            | ENSG00000162366 | MARK2    | 80   | 4  | 3  | 0  | 4  | 2  | 5  | 4  | 3  | 5  | 0  | 0  | 0  | 2  | 1  | 4  | 2  | 1  | 1  | 4  | 2  | 5  | 4  | 4  | 2  | 5  | 3  | 2  | 2  | 4  | 2  |   |
| ENSP00000294338,ENSP000001 | ENSG00000162366 | PDZK1IP1 | 11   | 0  | 0  | 0  | 0  | 0  | 0  | 4  | 2  | 3  | 0  | 0  | 0  | 0  | 0  | 0  | 0  | 0  | 0  | 0  | 0  | 0  | 0  | 0  | 0  | 1  | 1  | 0  | 0  | 0  | 0  |   |
| ENSP00000294383            | ENSG00000162402 | USP24    | 60   | 4  | 1  | 0  | 9  | 5  | 3  | 4  | 1  | 1  | 0  | 0  | 0  | 0  | 0  | 0  | 4  | 2  | 1  | 2  | 1  | 0  | 0  | 1  | 1  | 2  | 3  | 5  | 4  | 2  | 4  |   |
| ENSP00000294419,ENSP000001 | ENSG00000162433 | AK3L1    | 64   | 6  | 3  | 2  | 0  | 0  | 0  | 3  | 2  | 3  | 0  | 4  | 4  | 1  | 0  | 2  | 0  | 4  | 3  | 2  | 3  | 2  | 1  | 3  | 2  | 2  | 1  | 1  | 4  | 3  | 3  |   |
| ENSP00000294623,ENSP000001 | ENSG00000162613 | FUBP1    | 619  | 25 | 16 | 19 | 18 | 23 | 20 | 25 | 21 | 13 | 25 | 15 | 15 | 18 | 14 | 18 | 21 | 15 | 17 | 37 | 19 | 33 | 32 | 21 | 22 | 18 | 18 | 24 | 18 | 18 |    |   |
| ENSP00000294661            | ENSG00000162642 | C1orf52  | 14   | 0  | 0  | 0  | 1  | 0  | 0  | 1  | 0  | 1  | 0  | 0  | 0  | 1  | 0  | 0  | 1  | 0  | 1  | 3  | 0  | 0  | 0  | 0  | 0  | 0  | 0  | 0  | 0  | 0  | 1  | 0 |
| ENSP00000294742            | ENSG00000162704 | ARPC5    | 25   | 3  | 1  | 1  | 0  | 1  | 0  | 1  | 2  | 1  | 1  | 1  | 0  | 0  | 1  | 1  | 0  | 1  | 0  | 1  | 1  | 0  | 1  | 2  | 0  | 1  | 3  | 0  | 1  | 0  | 0  |   |
| ENSP00000294785,ENSP000001 | ENSG00000162736 | NCSTN    | 20   | 1  | 1  | 0  | 0  | 0  | 0  | 0  | 1  | 0  | 0  | 0  | 0  | 1  | 0  | 0  | 0  | 1  | 1  | 2  | 0  | 0  | 1  | 1  | 0  | 3  | 2  | 0  | 2  | 2  | 1  |   |
| ENSP00000295024            | ENSG00000162923 | WDR26    | 25   | 1  | 1  | 0  | 0  | 0  | 0  | 0  | 0  | 1  | 0  | 3  | 0  | 1  | 0  | 1  | 1  | 2  | 2  | 2  | 1  | 1  | 0  | 1  | 1  | 1  | 1  | 1  | 1  | 1  | 1  |   |
| ENSP00000295025,ENSP000001 | ENSG00000162924 | REL      | 12   | 0  | 0  | 0  | 3  | 0  | 0  | 1  | 0  | 0  | 0  | 0  | 0  | 2  | 0  | 1  | 0  | 0  | 0  | 2  | 0  | 1  | 0  | 0  | 0  | 1  | 0  | 1  | 0  | 1  | 0  |   |
| ENSP00000295079,ENSP000001 | ENSG00000162972 | C2orf47  | 42   | 1  | 2  | 0  | 1  | 2  | 1  | 1  | 2  | 0  | 0  | 3  | 2  | 1  | 0  | 1  | 1  | 2  | 1  | 1  | 3  | 1  | 0  | 2  | 1  | 2  | 4  | 1  | 2  | 2  | 2  |   |
| ENSP00000295266            | ENSG00000163114 | PDHA2    | 134  | 9  | 5  | 5  | 3  | 5  | 1  | 4  | 6  | 3  | 5  | 6  | 3  | 3  | 4  | 1  | 4  | 5  | 2  | 4  | 6  | 3  | 6  | 6  | 3  | 8  | 7  | 2  | 7  | 5  | 3  |   |
| ENSP00000295321            | ENSG00000163166 | IWS1     | 89   | 5  | 5  | 1  | 3  | 2  | 1  | 3  | 0  | 2  | 1  | 3  | 0  | 2  | 0  | 7  | 1  | 5  | 4  | 4  | 1  | 6  | 2  | 6  | 4  | 6  | 2  | 0  | 3  | 3  | 7  |   |
| ENSP00000295373            | ENSG00000163214 | DHX57    | 36   | 1  | 1  | 1  | 0  | 0  | 0  | 2  | 0  | 1  | 0  | 0  | 0  | 0  | 2  | 3  | 3  | 2  | 2  | 0  | 3  | 2  | 1  | 1  | 0  | 2  | 4  | 1  | 3  | 1  | 0  |   |
| ENSP00000295448            | ENSG00000163281 | GNPDA2   | 73   | 3  | 2  | 2  | 3  | 3  | 2  | 2  | 0  | 1  | 2  | 3  | 1  | 2  | 0  | 3  | 2  | 3  | 3  | 3  | 3  | 2  | 2  | 1  | 3  | 1  | 5  | 4  | 3  | 4  | 5  | 3 |
| ENSP00000295453            | ENSG00000163286 | ALPPL2   | 86   | 0  | 0  | 0  | 0  | 0  | 0  | 0  | 0  | 0  | 0  | 1  | 0  | 0  | 1  | 0  | 0  | 0  | 0  | 0  | 0  | 0  | 22 | 33 | 29 | 0  | 0  | 0  | 0  | 0  | 0  |   |
| ENSP00000295470            | ENSG00000152795 | HNRPDL   | 619  | 18 | 21 | 23 | 15 | 17 | 12 | 16 | 24 | 15 | 20 | 29 | 17 | 22 | 30 | 16 | 24 | 21 | 19 | 34 | 23 | 24 | 21 | 26 | 18 | 14 | 17 | 9  | 22 | 30 | 22 |   |
| ENSP00000295572            | ENSG00000163380 | LMOD3    | 15   | 0  | 0  | 0  | 0  | 0  | 2  | 0  | 1  | 1  | 0  | 1  | 0  | 0  | 0  | 0  | 1  | 0  | 0  | 0  | 0  | 1  | 0  | 5  | 1  | 1  | 0  | 1  | 0  | 0  | 1  | 0 |
| ENSP00000295588            | ENSG00000163389 | KTELC1   | 30   | 1  | 2  | 2  | 0  | 0  | 1  | 2  | 2  | 1  | 0  | 2  | 1  | 0  | 1  | 1  | 0  | 1  | 2  | 1  | 1  | 1  | 1  | 1  | 2  | 0  | 0  | 2  | 0  | 0  | 0  | 1 |
| ENSP00000295598,ENSP000001 | ENSG00000163399 | ATP1A1   | 1071 | 57 | 34 | 36 | 28 | 55 | 51 | 33 | 33 | 28 | 22 | 47 | 30 | 21 | 16 | 26 | 29 | 42 | 28 | 32 | 41 | 28 | 24 | 43 | 34 | 52 | 70 | 46 | 29 | 28 | 24 |   |
| ENSP00000295633            | ENSG00000163430 | FSTL1    | 10   | 0  | 0  | 0  | 1  | 1  | 0  | 2  | 0  | 0  | 0  | 0  | 0  | 0  | 1  | 0  | 1  | 0  | 0  | 1  | 0  | 1  | 0  | 0  | 1  | 0  | 0  | 1  | 0  | 0  | 0  | 0 |
| ENSP00000295640            | ENSG00000176393 | RNPBP    | 279  | 12 | 10 | 9  | 8  | 11 | 8  | 10 | 13 | 11 | 0  | 2  | 2  | 7  | 6  | 11 | 6  | 11 | 7  | 11 | 22 | 12 | 5  | 9  | 7  | 15 | 18 | 14 | 7  | 10 | 5  |   |
| ENSP00000295641            | ENSG00000144589 | STK11IP  | 33   | 0  | 1  | 1  | 0  | 3  | 1  | 0  | 1  | 1  | 0  | 1  | 0  | 1  | 3  | 5  | 0  | 1  | 1  | 1  | 2  | 1  | 1  | 1  | 2  | 1  | 2  | 2  | 0  | 0  | 0  | 0 |
| ENSP00000295704            | ENSG00000163481 | RNF25    | 22   | 0  | 1  | 2  | 1  | 1  | 0  | 1  | 0  | 0  | 0  | 0  | 0  | 2  | 2  | 1  | 0  | 0  | 0  | 1  | 2  | 0  | 1  | 0  | 0  | 2  | 0  | 0  | 4  | 0  | 1  | 0 |
| ENSP00000295713            | ENSG00000163486 | SRGAP2   | 27   | 1  | 1  | 0  | 2  | 2  | 0  | 0  | 0  | 2  | 1  | 1  | 1  | 0  | 0  | 0  | 2  | 2  | 0  | 2  | 3  | 1  | 1  | 1  | 0  | 0  | 0  | 2  | 0  | 1  | 1  | 0 |
| ENSP00000295736            | ENSG00000133867 |          | 24   | 2  | 0  | 0  | 0  | 0  | 0  | 0  | 1  | 0  | 0  | 0  | 0  | 1  | 0  | 0  | 0  | 3  | 2  | 1  | 2  | 2  | 0  | 1  | 0  | 1  | 1  | 1  | 3  | 2  | 1  |   |
| ENSP00000295746            | ENSG00000163507 | KIAA1524 | 39   | 2  | 1  | 0  | 1  | 0  | 1  | 3  | 0  | 0  | 1  | 0  | 1  | 2  | 1  | 4  | 1  | 0  | 2  | 2  | 4  | 2  | 1  | 0  | 0  | 0  | 2  | 0  | 1  | 2  | 5  |   |
| ENSP00000295766            | ENSG00000163526 | ANKZF1   | 124  | 6  | 8  | 2  | 0  | 6  | 3  | 2  | 2  | 3  | 2  | 6  | 2  | 3  | 2  | 4  | 2  | 2  | 5  | 2  | 6  | 6  | 1  | 5  | 1  | 6  | 9  | 7  | 5  | 10 | 6  |   |
| ENSP00000295767,ENSP000001 | ENSG00000163528 | CHCHD4   | 71   | 2  | 1  | 0  | 2  | 1  | 0  | 2  | 1  | 2  | 0  | 5  | 1  | 2  | 0  | 2  | 0  | 2  | 3  | 1  | 2  | 2  | 2  | 3  | 4  | 6  | 4  | 7  | 3  | 4  | 5  | 4 |
| ENSP00000295770            | ENSG00000163527 | STT3B    | 172  | 6  | 4  | 6  | 5  | 10 | 5  | 3  | 3  | 6  | 5  | 8  | 6  | 7  | 6  | 5  | 4  | 7  | 8  | 9  | 6  | 5  | 4  | 6  | 5  | 10 | 4  | 5  | 5  | 4  | 5  |   |
| ENSP00000295802            | ENSG00000144445 | RETSAT   | 37   | 1  | 0  | 0  | 3  | 1  | 2  | 1  | 0  | 2  | 0  | 0  | 0  | 0  | 0  | 0  | 1  | 2  | 3  | 1  | 0  | 0  | 0  | 0  | 4  | 0  | 3  | 6  | 6  | 0  | 1  | 0 |
| ENSP00000295822            | ENSG00000163577 | EIF5A2   | 207  | 5  | 4  | 2  | 8  | 5  | 7  | 5  | 1  | 5  | 4  | 8  | 4  | 8  | 6  | 8  | 8  | 9  | 8  | 8  | 7  | 9  | 4  | 6  | 7  | 9  | 7  | 12 | 13 | 11 | 9  |   |
| ENSP00000295834            | ENSG00000163586 | FABP1    | 39   | 6  | 3  | 3  | 1  | 1  | 3  | 1  | 2  | 0  | 0  | 0  | 0  | 0  | 0  | 0  | 0  | 0  | 0  | 0  | 0  | 0  | 0  | 0  | 0  | 6  | 8  | 5  | 0  | 0  | 0  |   |
| ENSP00000295851,ENSP000001 | ENSG00000138443 | ABI2     | 19   | 0  | 1  | 0  | 0  | 1  | 0  | 0  | 0  | 1  | 1  | 0  | 1  | 1  | 1  | 1  | 1  | 1  | 1  | 3  | 1  | 2  | 0  | 0  | 0  | 0  | 0  | 0  | 1  | 0  | 1  | 0 |
| ENSP00000295859            | ENSG00000163602 | RYBP     | 16   | 1  | 0  | 2  | 0  | 0  | 0  | 0  | 0  | 1  | 0  | 0  | 0  | 0  | 1  | 0  | 1  | 1  | 0  | 1  | 1  | 0  | 1  | 1  | 0  | 1  | 0  | 0  | 1  | 2  | 1  | 1 |
| ENSP00000295862,ENSP000001 | ENSG00000163605 | PPP4R2   | 99   | 10 | 6  | 3  | 5  | 3  | 1  | 3  | 2  | 2  | 9  | 4  | 5  | 1  | 2  | 2  | 1  | 3  | 4  | 4  | 1  | 2  | 4  | 2  | 0  | 3  | 2  | 4  | 6  | 3  |    |   |
| ENSP00000295884            | ENSG00000151276 | MAGI1    | 23   | 2  | 4  | 3  | 0  | 0  | 0  | 1  | 0  | 1  | 0  | 0  | 0  | 1  | 0  | 0  | 0  | 2  | 1  | 1  | 0  | 1  |    |    |    |    |    |    |    |    |    |   |





|                            |                 |          |      |    |    |    |    |     |    |    |    |    |    |    |    |    |    |    |    |    |    |    |    |    |    |    |    |     |     |     |    |    |    |   |
|----------------------------|-----------------|----------|------|----|----|----|----|-----|----|----|----|----|----|----|----|----|----|----|----|----|----|----|----|----|----|----|----|-----|-----|-----|----|----|----|---|
| ENSP00000303427            | ENSG00000121892 | PDS5A    | 342  | 8  | 10 | 8  | 15 | 9   | 12 | 17 | 11 | 11 | 6  | 12 | 8  | 5  | 7  | 10 | 11 | 14 | 11 | 15 | 22 | 14 | 9  | 15 | 13 | 14  | 9   | 5   | 15 | 9  | 17 |   |
| ENSP00000303476            | ENSG00000171914 | TLN2     | 151  | 23 | 10 | 9  | 3  | 3   | 3  | 2  | 2  | 0  | 3  | 1  | 3  | 1  | 4  | 2  | 3  | 2  | 4  | 6  | 5  | 6  | 15 | 12 | 3  | 8   | 3   | 4   | 3  | 5  |    |   |
| ENSP00000303507            | ENSG00000186716 | BCR      | 50   | 2  | 3  | 3  | 2  | 4   | 2  | 0  | 1  | 0  | 0  | 0  | 3  | 1  | 2  | 0  | 1  | 0  | 1  | 3  | 1  | 0  | 3  | 2  | 3  | 4   | 1   | 3   | 2  | 1  |    |   |
| ENSP00000303515,ENSP000001 | ENSG00000169718 | DUS1L    | 31   | 0  | 0  | 2  | 2  | 1   | 0  | 1  | 1  | 0  | 1  | 0  | 0  | 1  | 4  | 1  | 1  | 1  | 1  | 1  | 3  | 1  | 2  | 1  | 0  | 1   | 2   | 1   | 1  | 0  | 1  |   |
| ENSP00000303525            | ENSG00000145439 | CBR4     | 30   | 1  | 1  | 1  | 0  | 1   | 1  | 1  | 1  | 1  | 1  | 0  | 1  | 1  | 1  | 0  | 2  | 1  | 1  | 1  | 0  | 1  | 1  | 1  | 4  | 2   | 1   | 1   | 1  | 0  |    |   |
| ENSP00000303552,ENSP000001 | ENSG00000171503 | ETFDH    | 35   | 0  | 0  | 0  | 3  | 3   | 3  | 1  | 0  | 0  | 0  | 0  | 0  | 1  | 1  | 0  | 2  | 0  | 1  | 0  | 1  | 0  | 1  | 2  | 1  | 1   | 3   | 4   | 3  | 1  | 1  | 3 |
| ENSP00000303570            | ENSG00000106524 | ANKMY2   | 16   | 1  | 0  | 0  | 0  | 0   | 0  | 1  | 0  | 0  | 0  | 0  | 0  | 1  | 3  | 0  | 0  | 0  | 1  | 5  | 2  | 0  | 0  | 0  | 0  | 1   | 0   | 0   | 0  | 0  | 1  |   |
| ENSP00000303575,ENSP000001 | ENSG00000170502 | NUDT9    | 58   | 2  | 2  | 2  | 2  | 1   | 2  | 3  | 1  | 2  | 1  | 0  | 0  | 2  | 1  | 2  | 1  | 2  | 2  | 2  | 2  | 2  | 2  | 3  | 2  | 3   | 4   | 2   | 5  | 1  | 2  |   |
| ENSP00000303600            | ENSG00000071054 | MAP4K4   | 15   | 3  | 1  | 0  | 1  | 1   | 1  | 0  | 0  | 0  | 0  | 0  | 0  | 0  | 0  | 0  | 0  | 1  | 1  | 1  | 0  | 1  | 0  | 1  | 0  | 1   | 2   | 0   | 0  | 0  | 0  |   |
| ENSP00000303623            | ENSG00000105281 | SLC1A5   | 280  | 13 | 10 | 3  | 9  | 15  | 10 | 8  | 10 | 13 | 11 | 28 | 20 | 4  | 3  | 11 | 7  | 10 | 5  | 7  | 6  | 11 | 5  | 8  | 6  | 5   | 9   | 7   | 8  | 9  | 9  |   |
| ENSP00000303634            | ENSG00000157193 | LRP8     | 11   | 0  | 0  | 0  | 0  | 0   | 0  | 3  | 1  | 5  | 0  | 0  | 0  | 1  | 0  | 0  | 1  | 0  | 0  | 0  | 0  | 0  | 0  | 0  | 0  | 0   | 0   | 0   | 0  | 0  | 0  | 0 |
| ENSP00000303698,ENSP000001 | ENSG00000075413 | MARK3    | 80   | 4  | 3  | 0  | 2  | 1   | 3  | 3  | 2  | 5  | 0  | 0  | 0  | 2  | 0  | 6  | 2  | 3  | 1  | 3  | 4  | 6  | 3  | 4  | 1  | 4   | 3   | 2   | 3  | 7  | 3  |   |
| ENSP00000303709            | ENSG00000170142 | UBE2E1   | 37   | 2  | 0  | 2  | 1  | 1   | 0  | 1  | 0  | 0  | 0  | 2  | 1  | 1  | 1  | 1  | 1  | 1  | 1  | 1  | 4  | 1  | 2  | 1  | 0  | 2   | 3   | 1   | 3  | 2  | 1  |   |
| ENSP00000303754            | ENSG00000171497 | PPID     | 148  | 8  | 3  | 2  | 3  | 2   | 3  | 1  | 2  | 0  | 0  | 3  | 2  | 5  | 1  | 10 | 8  | 6  | 8  | 8  | 9  | 6  | 1  | 1  | 1  | 5   | 13  | 6   | 10 | 13 | 8  |   |
| ENSP00000303788            | ENSG00000168564 | CDKN2AIF | 53   | 0  | 0  | 1  | 2  | 1   | 2  | 1  | 2  | 0  | 0  | 2  | 0  | 4  | 0  | 2  | 0  | 1  | 0  | 3  | 5  | 3  | 4  | 5  | 4  | 1   | 2   | 1   | 2  | 3  | 2  |   |
| ENSP00000303800            | ENSG00000170322 | NFRKB    | 11   | 1  | 1  | 0  | 1  | 0   | 0  | 0  | 0  | 0  | 0  | 0  | 1  | 0  | 0  | 1  | 2  | 0  | 0  | 0  | 1  | 0  | 0  | 0  | 1  | 0   | 1   | 0   | 1  | 0  | 0  |   |
| ENSP00000303908            | ENSG00000221814 |          | 163  | 6  | 2  | 3  | 4  | 3   | 5  | 3  | 4  | 5  | 1  | 8  | 4  | 4  | 1  | 5  | 6  | 10 | 9  | 3  | 10 | 7  | 2  | 5  | 5  | 2   | 9   | 7   | 6  | 13 | 11 |   |
| ENSP00000303968,ENSP000001 | ENSG00000105808 | RASA4    | 14   | 0  | 0  | 0  | 0  | 0   | 0  | 3  | 2  | 4  | 0  | 0  | 0  | 0  | 1  | 1  | 0  | 0  | 0  | 1  | 0  | 0  | 1  | 0  | 0  | 1   | 0   | 0   | 0  | 0  | 0  | 0 |
| ENSP00000303991            | ENSG00000162191 | UBXN1    | 84   | 2  | 3  | 2  | 2  | 2   | 3  | 2  | 1  | 4  | 0  | 1  | 2  | 1  | 1  | 3  | 3  | 5  | 3  | 3  | 5  | 5  | 2  | 6  | 3  | 2   | 3   | 3   | 5  | 4  | 4  |   |
| ENSP00000303992            | ENSG00000170876 | TMEM43   | 85   | 3  | 2  | 1  | 3  | 2   | 0  | 2  | 1  | 1  | 1  | 6  | 4  | 6  | 2  | 3  | 4  | 3  | 2  | 5  | 2  | 4  | 2  | 6  | 5  | 2   | 3   | 2   | 1  | 3  | 4  |   |
| ENSP00000304006            | ENSG00000168092 | PAFAH1B  | 17   | 0  | 1  | 1  | 0  | 1   | 0  | 1  | 1  | 1  | 1  | 1  | 0  | 0  | 1  | 1  | 1  | 2  | 0  | 0  | 1  | 1  | 0  | 0  | 0  | 0   | 1   | 1   | 0  | 0  | 0  | 0 |
| ENSP00000304017            | ENSG00000171953 | ATPAF2   | 94   | 4  | 3  | 2  | 3  | 2   | 2  | 3  | 3  | 3  | 3  | 3  | 1  | 1  | 2  | 2  | 3  | 3  | 4  | 4  | 5  | 3  | 5  | 3  | 5  | 6   | 3   | 4   | 4  | 4  | 2  |   |
| ENSP00000304072            | ENSG00000123064 | DDX54    | 77   | 4  | 1  | 2  | 0  | 1   | 1  | 2  | 1  | 4  | 2  | 4  | 1  | 2  | 1  | 4  | 1  | 1  | 2  | 4  | 1  | 3  | 2  | 4  | 8  | 3   | 3   | 3   | 3  | 6  | 3  |   |
| ENSP00000304078            | ENSG00000168143 | FAM83B   | 25   | 0  | 1  | 1  | 5  | 2   | 1  | 1  | 0  | 0  | 0  | 0  | 2  | 1  | 1  | 0  | 0  | 0  | 1  | 1  | 1  | 1  | 0  | 0  | 1  | 1   | 3   | 2   | 0  | 0  | 0  | 0 |
| ENSP00000304102            | ENSG00000168090 | COPS6    | 11   | 1  | 0  | 0  | 0  | 0   | 0  | 0  | 0  | 0  | 0  | 0  | 0  | 0  | 0  | 0  | 0  | 0  | 0  | 0  | 1  | 0  | 0  | 0  | 1  | 0   | 2   | 1   | 0  | 2  | 2  |   |
| ENSP00000304139            | ENSG00000170748 | RBMLX2   | 138  | 6  | 3  | 2  | 3  | 7   | 3  | 7  | 6  | 2  | 4  | 10 | 3  | 5  | 6  | 3  | 3  | 7  | 4  | 5  | 5  | 4  | 5  | 5  | 3  | 7   | 4   | 2   | 5  | 6  | 3  |   |
| ENSP00000304151            | ENSG00000170727 | BOP1     | 240  | 11 | 6  | 10 | 6  | 7   | 8  | 7  | 8  | 4  | 8  | 13 | 7  | 5  | 9  | 8  | 8  | 11 | 10 | 10 | 8  | 8  | 5  | 9  | 5  | 6   | 4   | 3   | 11 | 16 | 9  |   |
| ENSP00000304229            | ENSG00000169567 | HINT1    | 93   | 2  | 3  | 3  | 1  | 3   | 5  | 1  | 3  | 3  | 3  | 4  | 3  | 4  | 4  | 1  | 2  | 4  | 2  | 2  | 4  | 1  | 4  | 4  | 2  | 7   | 3   | 2   | 4  | 7  | 2  |   |
| ENSP00000304283            | ENSG00000169750 | RAC3     | 135  | 5  | 4  | 4  | 2  | 5   | 6  | 3  | 4  | 3  | 4  | 6  | 3  | 3  | 3  | 5  | 5  | 6  | 3  | 4  | 5  | 3  | 10 | 6  | 4  | 7   | 5   | 2   | 6  | 4  | 4  |   |
| ENSP00000304350            | ENSG00000174231 | PRPF8    | 578  | 27 | 19 | 9  | 7  | 15  | 16 | 12 | 9  | 18 | 10 | 36 | 26 | 17 | 7  | 21 | 17 | 18 | 18 | 18 | 17 | 21 | 17 | 36 | 32 | 15  | 22  | 18  | 17 | 36 | 27 |   |
| ENSP00000304353            | ENSG00000172336 | POP7     | 32   | 1  | 1  | 2  | 1  | 1   | 1  | 0  | 1  | 1  | 1  | 1  | 0  | 1  | 1  | 1  | 1  | 2  | 1  | 1  | 2  | 1  | 3  | 1  | 1  | 1   | 1   | 0   | 1  | 1  | 1  | 1 |
| ENSP00000304376,ENSP000001 | ENSG00000169228 | RAB24    | 16   | 0  | 1  | 2  | 1  | 1   | 0  | 2  | 0  | 0  | 0  | 0  | 1  | 0  | 0  | 0  | 0  | 0  | 0  | 1  | 0  | 0  | 0  | 0  | 2  | 0   | 1   | 1   | 1  | 0  | 2  |   |
| ENSP00000304405,ENSP000001 | ENSG00000125944 | HNRNP9   | 487  | 18 | 13 | 8  | 9  | 17  | 17 | 15 | 16 | 14 | 9  | 27 | 16 | 16 | 6  | 15 | 18 | 21 | 15 | 11 | 11 | 21 | 20 | 21 | 17 | 17  | 17  | 23  | 23 | 19 |    |   |
| ENSP00000304429,ENSP000001 | ENSG00000162627 | SNX7     | 16   | 1  | 0  | 1  | 0  | 0   | 0  | 1  | 2  | 2  | 0  | 0  | 0  | 0  | 0  | 1  | 0  | 0  | 0  | 0  | 2  | 2  | 0  | 0  | 1  | 1   | 0   | 0   | 0  | 0  | 1  | 1 |
| ENSP00000304467,ENSP000001 | ENSG00000172009 | THOP1    | 205  | 5  | 5  | 2  | 5  | 3   | 6  | 4  | 1  | 4  | 2  | 11 | 3  | 8  | 3  | 6  | 13 | 10 | 7  | 12 | 7  | 11 | 6  | 9  | 3  | 9   | 10  | 6   | 10 | 14 | 10 |   |
| ENSP00000304565            | ENSG00000168461 | RAB31    | 30   | 1  | 1  | 1  | 2  | 1   | 2  | 1  | 2  | 0  | 0  | 1  | 1  | 1  | 0  | 1  | 1  | 2  | 1  | 1  | 1  | 2  | 1  | 1  | 1  | 1   | 1   | 1   | 0  | 0  | 1  |   |
| ENSP00000304592            | ENSG00000169710 | FASN     | 1816 | 80 | 61 | 51 | 60 | 100 | 68 | 64 | 37 | 55 | 14 | 33 | 21 | 46 | 47 | 46 | 80 | 66 | 90 | 55 | 61 | 59 | 32 | 49 | 30 | 114 | 149 | 102 | 41 | 53 | 52 |   |
| ENSP00000304668            | ENSG00000170445 | HARS     | 477  | 21 | 10 | 15 | 13 | 25  | 16 | 15 | 10 | 11 | 7  | 17 | 10 | 9  | 12 | 9  | 15 | 19 | 16 | 18 | 17 | 13 | 14 | 19 | 9  | 23  | 19  | 13  | 27 | 35 | 20 |   |
| ENSP00000304669            | ENSG00000044115 | CTNNA1   | 1021 | 45 | 42 | 36 | 22 | 40  | 32 | 44 | 38 | 44 | 19 | 40 | 20 | 36 | 26 | 38 | 30 | 49 | 30 | 33 | 33 | 36 | 42 | 46 | 36 | 61  | 54  | 40  | 8  | 7  | 4  |   |
| ENSP00000304743,ENSP000001 | ENSG00000163539 | CLASP2   | 63   | 3  | 2  | 3  | 1  | 1   | 0  | 1  | 1  | 1  | 0  | 1  | 2  | 2  | 6  | 1  | 2  | 5  | 2  | 5  | 4  | 0  | 0  | 0  | 4  | 6   | 1   | 1   | 5  | 3  | 5  |   |
| ENSP00000304854            | ENSG00000170584 | NUDCD2   | 53   | 2  | 2  | 1  | 1  | 1   | 1  | 1  | 0  | 0  | 1  | 4  | 1  | 2  | 1  | 1  | 2  | 2  | 3  | 1  | 4  | 1  | 1  | 2  | 1  | 4   | 3   | 3   | 1  | 6  | 0  |   |
| ENSP00000304855,ENSP000001 | ENSG00000170439 | METTL7B  | 67   | 1  | 2  | 3  | 4  | 3   | 2  | 4  | 0  | 3  | 4  | 4  | 3  | 1  | 1  | 1  | 1  | 2  | 1  | 3  | 4  | 1  | 2  | 4  | 2  | 3   | 4   | 3   | 0  | 0  | 1  |   |
| ENSP00000304891,ENSP000001 | ENSG00000171142 | ATP6V1E2 | 28   | 3  | 1  | 1  | 0  | 0   | 1  | 1  | 2  | 0  | 1  | 1  | 0  | 0  | 1  | 1  | 0  | 0  | 2  | 1  | 3  | 1  | 1  | 3  | 0  | 0   | 1   | 0   | 1  | 1  | 1  | 1 |
| ENSP00000304903            | ENSG00000169217 | CD2BP2   | 28   | 3  | 0  | 0  | 0  | 0   | 1  | 0  | 0  | 1  | 0  | 3  | 0  | 1  | 0  | 0  | 2  | 0  | 3  | 0  | 1  | 3  | 0  | 1  | 1  | 1   | 1   | 1   | 1  | 3  | 1  |   |
| ENSP00000304997            | ENSG00000170855 | TRIAP1   | 35   | 0  | 1  | 1  | 0  | 0   | 1  | 1  | 0  | 0  | 1  | 2  | 0  | 0  | 1  | 3  | 0  | 2  | 1  | 1  | 1  | 2  | 2  | 4  | 2  | 2   | 2   | 2   | 1  | 1  | 1  |   |
| ENSP00000305027,ENSP000001 | ENSG00000168502 | KIAA0802 | 17   | 2  | 0  | 0  | 1  | 0   | 0  | 2  | 0  | 0  | 0  | 0  | 0  | 1  | 2  | 0  | 1  | 3  | 0  | 0  | 0  | 0  | 0  | 0  | 0  | 0   | 0   | 0   | 0  | 0  | 0  | 0 |
| ENSP00000305039            | ENSG00000171362 |          | 10   | 0  | 0  | 0  | 0  | 1   | 1  | 0  | 0  | 0  | 0  | 0  | 0  | 0  | 0  | 0  | 0  | 0  | 0  | 0  | 0  | 0  | 2  | 0  | 2  | 0   | 1   | 0   | 0  | 0  | 0  |   |
| ENSP00000305069            | ENSG00000170808 | TMEM192  | 30   | 1  | 0  | 1  | 1  | 1   | 1  | 1  | 1  | 1  | 1  | 1  | 1  | 1  | 2  | 1  | 1  | 1  | 1  | 2  | 2  | 1  | 1  | 1  | 1  | 1   | 1   | 1   | 1  | 0  | 0  | 0 |
| ENSP00000305161            | ENSG00000169871 | TRIM56   | 49   | 1  | 0  | 2  | 2  | 2   | 0  | 2  | 2  | 0  | 4  | 0  | 1  | 1  | 1  | 0  | 0  | 2  | 0  | 4  | 2  | 0  | 2  | 1  | 2  | 3   | 2   | 1   | 4  | 4  | 4  |   |
| ENSP00000305193            | ENSG00000118960 | HS1BP3   | 28   | 2  | 2  | 0  | 1  | 1   | 0  | 0  | 0  | 2  | 0  | 0  | 0  | 1  | 0  | 1  | 1  | 0  | 1  | 1  | 0  | 1  | 0  | 0  | 0  | 4   | 3   | 5   | 0  | 0  | 1  | 1 |
| ENSP00000305255            | ENSG00000170310 | STX8     | 45   | 0  | 0  | 2  | 1  | 1   | 1  | 1  | 2  | 0  | 3  | 3  | 2  | 1  | 1  | 1  | 1  | 1  | 1  | 2  | 7  | 1  | 3  | 1  | 0  | 1   | 0   | 1   | 3  | 1  |    |   |

ENSP00000306535,ENSP000003:ENSG00000174428  
ENSP00000306548  
ENSP00000306614  
ENSP00000306670,ENSP000003:ENSG00000168101  
ENSP00000306761  
ENSP00000306866  
ENSP00000306881  
ENSP00000306887  
ENSP00000306920,ENSP000003:ENSG00000170266  
ENSP00000307014  
ENSP00000307071  
ENSP00000307078,ENSP000003:ENSG00000170759  
ENSP00000307079,ENSP000003:ENSG00000170324  
ENSP00000307089  
ENSP00000307126  
ENSP00000307156  
ENSP00000307181  
ENSP00000307188,ENSP000003:ENSG00000169910  
ENSP00000307208,ENSP000003:ENSG00000171634  
ENSP00000307214  
ENSP00000307260  
ENSP00000307265  
ENSP00000307272  
ENSP00000307275  
ENSP00000307280,ENSP000003:ENSG00000168530  
ENSP00000307288  
ENSP00000307297  
ENSP00000307298  
ENSP00000307304  
ENSP00000307318,ENSP000003:ENSG00000122884  
ENSP00000307387  
ENSP00000307432  
ENSP00000307471,ENSP000003:ENSG00000132535  
ENSP00000307481,ENSP000003:ENSG00000162066  
ENSP00000307491  
ENSP00000307508  
ENSP00000307525  
ENSP00000307544  
ENSP00000307567  
ENSP00000307666  
ENSP00000307674,ENSP000003:ENSG00000171302  
ENSP00000307684  
ENSP00000307705  
ENSP00000307706  
ENSP00000307765  
ENSP00000307786,ENSP000003:ENSG00000172115  
ENSP00000307805  
ENSP00000307833  
ENSP00000307863  
ENSP00000307889,ENSP000003:ENSG00000167526  
ENSP00000307928  
ENSP00000307933  
ENSP00000307940  
ENSP00000308021  
ENSP00000308067  
ENSP00000308179  
ENSP00000308193  
ENSP00000308208  
ENSP00000308344  
ENSP00000308369  
ENSP00000308405,ENSP000003:ENSG00000164032  
ENSP00000308450,ENSP000003:ENSG00000117399  
ENSP00000308495  
ENSP00000308532,ENSP000003:ENSG00000113758  
ENSP00000308541  
ENSP00000308546  
ENSP00000308606  
ENSP00000308610,ENSP000003:ENSG00000115159  
ENSP00000308622,ENSP000003:ENSG00000119392  
ENSP00000308671,ENSP000003:ENSG00000174891  
ENSP00000308695  
ENSP00000308717,ENSP000003:ENSG00000175581  
ENSP00000308753  
ENSP00000308773,ENSP000003:ENSG00000168781  
ENSP00000308897  
ENSP00000308901  
ENSP00000309031  
ENSP00000309070,ENSP000003:ENSG00000138674  
ENSP00000309096  
ENSP00000309142  
ENSP00000309148,ENSP000003:ENSG00000167755  
ENSP00000309175  
ENSP00000309198  
ENSP00000309230  
ENSP00000309262,ENSP000003:ENSG00000090686  
ENSP00000309297  
ENSP00000309298,ENSP000003:ENSG00000158987  
ENSP00000309302  
ENSP00000309334,ENSP000003:ENSG00000174748  
ENSP00000309415,ENSP000003:ENSG00000175416  
ENSP00000309433  
ENSP00000309438,ENSP000003:ENSG00000141959  
ENSP00000309463  
ENSP00000309493,ENSP000003:ENSG00000173612  
ENSP00000309539  
ENSP00000309561  
ENSP00000309565  
ENSP00000309595  
ENSP00000309629

GTF2IRD2  
MRPL13  
PIIH  
NUDT16L1  
C17orf28  
GABARAP  
SEC23A  
TMEM126/  
GLB1  
KRT73  
C15orf40  
KIF5B  
FRMPD2  
CELSR3  
DEGS2  
LAMB2  
FAM103A1  
BPTF  
LCMT2  
TBL2  
IRF2BP1  
RPTOR  
SCAMP3  
MYL1  
MCM7  
CHST14  
FEM1B  
CHD7  
P4HA1  
PDCD6IP  
SUGLC2  
DLG4  
AMDH2  
WDR48  
CALB2  
NMD3  
HNRNP  
QARS  
CCDC132  
CANT1  
TADA3  
HIST1H1E  
MT1E  
C17orf62  
CYCS  
AC093323  
FBXO22  
UZAF2  
RPL13  
GOLGA6L  
C11orf68  
EEF2  
CEP290  
SUGT1  
WDR3  
RNASEH2  
MMP14  
DCAF7  
LEMD3  
H2AFZ  
CDC20  
KRAS  
DBN1  
F2  
MEPCE  
AGR3  
GPD2  
GLE1  
RSRC1  
DPY19L1  
MRPL48  
TMOD3  
HISPPD2A  
MRPL15  
MRPL45  
MRPL41  
VCP  
SEC31A  
APO1107.  
PDE12  
KLK6  
EIF1AD  
UBE3C  
AC107883  
USP48  
SPON1  
RAPGEF6  
KDM2A  
RPL15  
CLTB  
TRMT112  
PKFL  
LIP2  
GPRC6A  
DPYSL2  
C19orf70  
UQCRRH  
C10orf2  
CFL1

40 3 3 0 0 1 1 2 1 1 3 3 2 0 2 0 0 0 1 0 0 0 2 2 1 3 3 1 3 1 1  
66 0 3 2 1 2 4 1 2 1 2 2 3 3 2 1 3 2 7 3 2 2 1 2 2 2 3 3 1 2 2 2  
131 4 1 3 5 6 4 5 4 2 2 2 3 5 3 4 3 7 7 7 7 8 5 5 3 4 6 4 6 5 5  
18 2 1 1 1 0 0 1 0 0 0 0 0 1 0 2 1 0 1 1 1 1 0 0 0 2 1 0 0 1 0  
24 0 0 0 1 1 0 1 0 0 0 0 1 0 2 0 0 1 0 1 3 1 1 1 3 0 0 2 2 1 1 1  
11 0 0 0 0 0 0 0 0 0 0 0 0 0 0 1 0 1 0 1 1 0 0 0 2 2 0 0 2 0 1  
102 6 11 4 0 0 3 1 3 6 0 2 0 0 3 4 4 0 2 2 2 2 5 1 3 4 8 8 9 1 6 4  
18 2 1 0 1 1 1 1 0 0 0 2 2 0 1 0 0 0 1 0 2 0 1 0 2 1 0 1 0 0 0 0  
184 19 15 13 5 5 3 7 4 3 4 8 8 8 2 5 6 8 4 8 3 4 5 6 5 6 9 2 4 2 3  
79 3 3 1 4 0 3 2 4 4 1 1 1 0 0 4 0 6 5 3 1 4 3 6 3 4 5 3 2 2 2 1  
21 0 2 1 1 1 1 1 1 1 1 0 0 0 0 0 1 0 1 0 0 0 1 1 0 1 1 1 2 1 1  
898 50 36 44 21 17 18 24 22 25 11 16 10 23 24 25 26 38 33 41 43 39 25 30 24 36 48 22 45 44 38  
17 0 0 0 0 0 2 0 3 0 0 0 0 0 0 2 0 1 1 0 0 0 0 5 0 0 0 3 0 0 0  
11 1 0 0 1 1 1 0 0 0 0 0 0 0 0 1 0 1 0 0 0 0 0 0 0 0 4 1 0 0 0  
11 0 0 0 0 1 0 1 0 2 2 0 0 0 0 0 0 0 0 1 0 0 0 1 0 2 1 0 0 0 0  
11 0 0 1 0 0 0 0 0 0 0 0 1 0 0 0 0 3 0 1 1 0 2 0 1 0 0 0 1 0 0  
52 0 0 3 1 1 1 3 1 2 1 2 1 0 0 2 2 5 2 2 1 3 2 3 2 1 2 1 3 2 3  
136 4 7 6 8 8 10 8 6 6 0 0 0 1 2 3 5 7 2 4 5 3 3 1 2 8 11 8 3 2 3  
65 3 2 2 4 0 1 6 2 3 0 3 3 0 1 2 4 0 4 4 7 1 4 0 1 1 1 2 1 1 3 3  
15 0 1 0 2 0 3 0 1 1 0 0 0 0 1 0 0 0 1 0 2 0 2 0 0 0 0 0 0 0 0  
135 7 7 5 6 4 6 6 6 5 2 1 3 2 3 3 2 7 6 7 6 4 3 9 3 4 2 3 6 3 4  
79 3 2 2 4 3 0 7 3 2 2 1 3 2 3 1 2 1 3 6 3 1 4 3 1 5 4 3 2 3 0  
39 0 2 0 1 2 2 1 1 1 1 0 0 1 1 1 3 2 4 4 3 0 1 1 3 0 1 0 1 1 3 2  
13 1 0 0 0 1 1 1 1 0 0 1 0 0 0 0 1 0 0 0 0 1 0 1 0 1 1 0 1 0 1  
120 6 2 4 9 5 5 8 2 2 2 1 3 2 4 2 3 6 3 8 9 2 5 4 2 6 4 4 3 2 2  
397 23 13 12 18 12 12 12 7 10 9 26 13 12 16 12 10 9 11 11 17 13 7 13 6 14 20 13 14 19 13  
11 2 0 0 1 0 0 2 1 0 0 0 0 0 0 0 0 1 0 2 1 0 1 0 0 0 0 0 0 0 0  
20 0 0 2 0 1 0 0 1 0 1 0 0 0 1 2 0 0 1 1 0 2 0 2 0 0 0 1 0 0 3 2  
43 4 2 6 3 0 0 1 1 1 2 0 0 2 2 2 0 0 2 6 1 1 1 0 0 3 0 2 0 2 1  
141 18 10 11 2 0 0 5 2 3 2 1 3 4 6 8 3 3 8 5 8 9 5 2 1 4 6 5 3 2 2  
531 21 14 23 17 17 14 15 15 11 7 18 13 16 17 14 18 23 18 18 25 20 12 19 16 28 27 26 15 17 17  
373 16 12 9 7 13 7 19 12 11 6 17 14 8 2 8 9 14 10 18 13 9 15 17 14 25 25 18 9 9 7  
42 3 1 1 3 4 3 2 0 1 0 2 2 1 0 1 2 1 1 3 2 2 1 1 1 0 2 1 1 0 1  
32 0 1 0 1 1 1 1 2 1 0 0 0 0 2 0 2 1 1 1 3 1 0 1 0 2 3 1 3 2 1  
38 0 1 2 0 0 0 0 0 0 2 2 2 0 0 1 0 0 2 2 2 1 2 0 0 1 3 4 0 5 5 3  
56 0 0 0 1 0 0 5 2 5 0 0 0 0 0 0 1 8 1 0 0 0 0 1 0 12 10 5 1 3 1  
10 0 1 0 0 0 0 1 0 0 0 0 0 0 0 1 1 0 0 0 0 1 0 0 0 0 1 2 0 1 1 0  
658 19 22 30 15 21 14 19 25 16 19 34 17 19 23 11 21 27 24 30 21 20 32 30 16 16 24 24 16 33 20  
416 20 13 13 14 18 11 19 10 7 6 14 6 13 11 15 11 17 15 14 12 10 13 16 11 24 21 11 16 22 13  
60 4 1 1 1 3 3 2 1 2 0 3 2 1 0 3 2 1 2 5 2 2 2 2 3 3 4 2 2 1 1 3  
49 2 0 0 5 8 5 4 1 0 0 0 2 1 1 1 1 1 3 1 0 0 1 0 1 3 2 3 0 2  
24 0 0 1 1 0 2 0 0 0 1 1 1 1 1 2 1 0 0 1 1 1 2 2 1 1 0 0 1 0 2 0  
813 18 20 25 20 37 27 23 20 20 21 29 21 68 25 15 42 26 17 28 35 21 32 29 26 31 26 21 35 38 17  
13 0 0 0 0 0 1 0 0 0 0 0 0 0 0 0 0 0 0 0 0 0 0 0 0 0 0 2 3 7  
18 0 1 1 1 0 1 1 2 0 0 0 0 0 0 0 1 0 0 1 1 1 1 1 2 0 0 0 1 1 0 0  
66 2 1 2 0 1 1 2 1 0 1 10 3 2 0 0 0 1 2 3 2 2 2 0 8 2 3 7 4 2 2 0  
10 1 1 0 0 0 1 0 0 1 0 1 0 0 0 0 0 0 0 0 0 0 0 0 1 0 2 1 0 0 1  
44 1 1 0 1 2 3 3 1 1 0 1 0 1 0 3 1 1 2 4 2 2 0 3 1 2 2 2 1 0 3  
152 11 4 1 2 3 3 3 4 7 0 11 4 5 0 8 8 5 5 4 3 3 3 8 7 5 7 8 4 10 6  
289 16 7 9 4 13 7 10 15 6 5 7 5 8 20 7 5 12 10 10 11 10 13 18 5 9 11 8 10 8 10  
14 1 0 0 1 1 0 3 1 0 0 1 0 0 0 0 0 0 0 0 0 0 1 0 0 0 1 1 2 1 0  
53 0 0 1 3 3 2 2 2 1 0 0 0 0 3 1 2 3 3 3 2 3 1 1 2 1 3 3 2 3 3  
1732 77 52 39 32 53 40 37 28 40 14 47 25 47 51 43 80 88 91 59 74 71 26 70 36 78 103 59 84 107 81  
15 2 0 1 2 1 1 0 0 0 0 0 1 0 1 0 1 0 0 0 1 0 0 0 0 1 0 0 0 0 1 1  
278 18 12 12 16 17 13 12 5 7 1 5 5 12 8 8 4 10 8 8 13 6 4 11 5 11 15 7 9 6 10  
166 5 3 2 1 1 3 4 3 7 0 9 4 6 4 9 4 8 10 4 5 5 5 12 7 5 9 4 4 14 9  
14 0 1 1 3 0 1 0 0 0 1 1 1 0 0 0 0 0 1 0 0 0 1 0 1 0 0 0 0 1 1 0  
11 2 0 1 0 0 0 0 0 0 1 1 1 0 0 0 0 0 0 0 0 0 0 0 0 0 0 1 0 1 1  
49 2 2 0 0 3 3 0 0 3 0 1 1 2 0 1 3 3 2 0 0 6 1 1 2 2 3 2 2 5 3  
89 1 2 2 2 4 1 2 2 1 6 3 1 5 2 4 3 1 2 4 3 2 5 6 5 4 5 2 2 1 3  
175 3 4 6 6 8 2 4 5 4 4 5 3 8 7 3 10 8 6 3 10 7 9 9 6 8 4 3 9 6 5  
20 1 0 1 0 0 1 0 0 0 0 2 1 2 0 2 0 1 2 0 1 1 0 1 0 0 0 1 0 2  
157 6 6 10 5 4 2 6 4 2 8 7 5 3 3 4 4 6 2 6 5 4 9 7 6 8 6 6 6 4 5 4  
231 21 9 13 1 1 1 4 5 2 11 24 10 0 0 0 5 15 9 2 4 1 10 18 9 0 0 1 15 21 19  
18 0 1 1 0 3 2 0 0 0 0 2 0 0 0 0 0 0 0 0 0 1 1 1 2 3 0 1 0 0 0  
54 0 1 0 0 2 1 3 1 2 4 9 4 0 0 1 1 0 1 2 1 0 2 1 3 2 1 3 2 1 6  
83 2 1 4 0 4 4 11 1 6 0 0 0 2 4 1 0 0 1 0 0 0 4 2 1 15 10 10 0 0  
368 14 9 9 8 8 8 15 8 11 5 15 12 6 1 8 15 17 15 15 9 11 13 26 12 18 24 14 12 18 12  
34 2 1 2 2 2 1 0 0 0 2 2 0 0 0 1 1 3 1 1 1 0 3 2 0 2 2 2 1 0 1  
26 2 0 1 1 1 0 0 0 0 0 2 0 1 1 1 0 2 2 2 1 0 3 2 1 1 0 1 0 1 0  
11 0 0 0 3 0 0 1 0 1 1 1 0 0 0 0 0 0 0 0 0 1 0 1 0 1 0 1 0 0 0  
68 3 2 2 4 1 2 4 2 1 2 3 1 1 1 2 1 4 1 4 1 3 2 5 2 2 3 3 1 3 2  
235 9 10 7 5 2 7 6 5 9 4 10 7 12 7 11 8 7 9 10 6 8 8 10 8 13 14 8 4 6 5  
27 2 0 0 3 3 1 2 0 1 0 0 0 1 0 0 1 0 0 2 0 0 0 2 0 1 5 2 0 0 1  
97 5 2 2 1 2 2 2 6 3 1 5 2 4 2 3 3 3 5 0 4 3 3 6 3 5 7 4 2 3 4  
66 3 2 2 3 3 3 2 3 2 3 1 3 3 2 2 2 3 3 2 2 2 0 2 2 3 2 4 3 1 2 1  
74 1 1 0 5 3 3 4 1 1 0 3 0 1 1 3 3 7 4 3 1 0 0 3 1 2 4 1 4 9 5  
140 15 11 8 7 9 8 7 7 8 2 3 1 0 0 0 2 4 2 0 0 0 4 10 3 6 9 7 3 2 2  
21 4 3 2 1 0 0 3 0 0 0 1 0 0 0 0 0 0 0 2 1 0 1 0 1 0 0 1 0 0 0  
93 5 3 1 4 4 3 2 0 0 0 8 4 2 1 3 5 3 4 4 2 5 1 2 3 2 5 2 1 10 4  
30 0 0 0 2 3 1 6 6 4 0 0 0 1 2 2 1 2 0 0 0 0 0 0 0 0 0 0 0 0 0  
29 2 0 2 1 1 2 2 0 0 0 0 0 2 2 0 2 1 0 1 1 0 2 2 1 1 1 0 1 1 1  
70 1 3 2 3 4 1 3 1 3 0 2 1 1 0 3 2 3 4 3 2 3 1 1 1 2 5 4 1 5 5  
10 0 1 0 1 0 1 0 1 0 0 0 0 0 0 0 0 2 0 0 0 0 1 0 1 0 0 0 2 0 0  
52 3 2 1 2 1 2 2 0 2 1 1 2 2 0 1 4 2 2 2 1 1 0 4 3 2 1 3 2 2 1  
27 5 1 1 0 0 0 0 0 0 0 0 0 0 0 0 0 0 0 1 0 0 4 4 4 2 3 2 0 0 0  
26 0 0 1 4 1 1 3 1 0 0 0 0 1 1 1 0 2 0 2 0 1 1 0 0 2 0 2 1 0 1  
58 2 3 5 2 0 1 2 3 0 3 2 1 3 3 2 1 1 2 4 3 3 1 2 0 2 1 1 3 1 1  
173 8 5 2 2 8 4 5 3 6 2 4 4 4 5 3 5 5 10 12 3 8 6 4 7 5 10 8 6 11 7  
168 5 3 7 4 5 4 3 6 2 8 4 4 4 2 11 7 2 6 6 4 10 2 15 10 3 5 8 3 8 4 7  
88 3 2 10 1 4 3 1 2 5 6 3 0 1 6 2 2 3 2 1 5 3 6 3 2 3 4 3 3 6 3  
16 6 3 2 1 2 1 2 3 2 0 4 1 3 1 2 2 2 4 4 1 2 1 7 1 5 14 8 2 1 1  
13 1 1 1 0 1 0 2 1 1 0 1 1 0 0 1 1 1 0 0 0 0 1 2 0 0 0 0 0 0 0  
417 1 0 0 0 1 0 1 0 0 0 0 0 0 1 1 0 1 0 1 0 1 1 0 1 0 1 0 1 0 0  
13 16 21 14 15 22 17 4 1 6 9 20 16 21 11 15 11 6 11 16 21 21 6 13 10 31 24 20 5 8 6  
14 0 0 0 0 1 1 0 0 1 0 2 0 0 0 1 2 1 1 1 0 1 0 0 0 0 0 0 1 0 1 0  
121 9 3 4 1 1 5 2 3 5 4 10 1 1 3 4 1 2 6 3 4 3 3 11 6 2 7 6 4 5 2  
18 1 0 0 0 0 0 1 1 0 0 0 0 0 0 1 1 1 1 0 0 0 0 1 2 1 2 1 1 2 1  
518 21 25 8 10 15 21 17 14 23 4 26 13 15 10 15 19 10 19 15 11 22 5 20 15 18 33 31 15 27 21

|                                            |                 |          |     |    |    |    |    |    |    |    |    |    |    |    |    |    |    |    |    |    |    |    |    |    |    |    |    |    |    |    |    |    |    |   |
|--------------------------------------------|-----------------|----------|-----|----|----|----|----|----|----|----|----|----|----|----|----|----|----|----|----|----|----|----|----|----|----|----|----|----|----|----|----|----|----|---|
| ENSP00000309644                            | ENSG00000145919 | BOD1     | 27  | 2  | 1  | 2  | 0  | 0  | 1  | 1  | 0  | 1  | 2  | 2  | 1  | 1  | 2  | 0  | 1  | 1  | 1  | 0  | 1  | 1  | 2  | 0  | 0  | 1  | 1  | 0  | 1  | 1  | 0  |   |
| ENSP00000309689                            | ENSG00000077454 | LRCH4    | 21  | 1  | 0  | 0  | 0  | 0  | 0  | 1  | 3  | 3  | 1  | 1  | 0  | 2  | 0  | 1  | 0  | 0  | 0  | 1  | 1  | 0  | 0  | 2  | 0  | 0  | 1  | 1  | 0  | 1  | 1  | 0 |
| ENSP00000309714                            | ENSG00000174705 | SH3PXD2f | 20  | 1  | 0  | 1  | 0  | 0  | 0  | 0  | 0  | 0  | 1  | 0  | 0  | 0  | 1  | 0  | 2  | 2  | 1  | 0  | 1  | 2  | 0  | 0  | 0  | 0  | 0  | 0  | 3  | 3  | 2  |   |
| ENSP00000309830                            | ENSG00000172809 | AC100786 | 84  | 4  | 3  | 1  | 0  | 3  | 2  | 1  | 0  | 2  | 0  | 3  | 1  | 3  | 1  | 4  | 4  | 7  | 2  | 1  | 8  | 4  | 2  | 4  | 2  | 6  | 6  | 1  | 4  | 3  | 2  |   |
| ENSP00000309871                            | ENSG00000161800 | RACGAP1  | 51  | 4  | 1  | 5  | 2  | 2  | 0  | 0  | 1  | 3  | 2  | 1  | 1  | 2  | 2  | 1  | 0  | 0  | 1  | 1  | 4  | 1  | 4  | 4  | 2  | 0  | 1  | 0  | 4  | 1  | 1  |   |
| ENSP00000309893                            | ENSG00000173905 | GOLIM4   | 56  | 0  | 1  | 0  | 2  | 1  | 2  | 4  | 3  | 5  | 2  | 1  | 2  | 1  | 2  | 0  | 0  | 0  | 2  | 1  | 1  | 3  | 4  | 2  | 4  | 5  | 4  | 0  | 0  | 3  |    |   |
| ENSP00000309923,ENSP000001:ENSG00000204256 |                 |          | 47  | 0  | 0  | 1  | 1  | 2  | 1  | 0  | 2  | 1  | 0  | 1  | 2  | 3  | 2  | 1  | 2  | 3  | 4  | 1  | 3  | 1  | 3  | 1  | 2  | 2  | 2  | 2  | 1  | 1  | 0  | 2 |
| ENSP00000309945,ENSP000001:ENSG00000169682 | 16              | 2        | 0   | 1  | 1  | 1  | 1  | 1  | 0  | 1  | 0  | 1  | 0  | 0  | 0  | 1  | 0  | 1  | 0  | 1  | 0  | 1  | 0  | 0  | 0  | 0  | 1  | 0  | 1  | 0  | 0  | 1  | 1  |   |
| ENSP00000310040                            | ENSG00000175390 | E1F3F    | 80  | 3  | 6  | 1  | 2  | 3  | 3  | 3  | 1  | 2  | 0  | 1  | 2  | 2  | 3  | 5  | 1  | 2  | 6  | 3  | 3  | 5  | 0  | 2  | 1  | 2  | 3  | 5  | 7  | 1  | 2  | 1 |
| ENSP00000310042                            | ENSG00000173545 | ZNF622   | 36  | 2  | 2  | 1  | 0  | 0  | 2  | 0  | 0  | 2  | 0  | 2  | 0  | 2  | 0  | 2  | 3  | 2  | 1  | 0  | 1  | 1  | 1  | 1  | 1  | 2  | 1  | 1  | 2  | 2  | 2  |   |
| ENSP00000310088,ENSP000001:ENSG00000159335 | 86              | 4        | 5   | 3  | 1  | 1  | 1  | 1  | 2  | 1  | 3  | 8  | 5  | 2  | 1  | 2  | 1  | 7  | 7  | 4  | 2  | 2  | 2  | 1  | 3  | 1  | 5  | 3  | 1  | 3  | 4  | 1  | 1  |   |
| ENSP00000310094                            | ENSG00000149930 | TAOK2    | 26  | 2  | 1  | 2  | 3  | 1  | 0  | 2  | 0  | 1  | 0  | 1  | 0  | 1  | 0  | 0  | 0  | 0  | 1  | 3  | 1  | 0  | 1  | 1  | 0  | 1  | 1  | 0  | 1  | 0  | 2  |   |
| ENSP00000310109                            | ENSG00000124831 | LRRFIP1  | 62  | 1  | 1  | 2  | 0  | 0  | 1  | 1  | 2  | 5  | 0  | 3  | 3  | 2  | 2  | 5  | 1  | 1  | 3  | 1  | 0  | 3  | 2  | 4  | 2  | 1  | 5  | 4  | 0  | 3  | 4  |   |
| ENSP00000310117                            | ENSG00000173457 | PPP1R14E | 49  | 1  | 3  | 2  | 1  | 0  | 2  | 0  | 0  | 1  | 1  | 1  | 0  | 1  | 2  | 1  | 2  | 4  | 3  | 0  | 1  | 4  | 1  | 0  | 0  | 3  | 5  | 2  | 2  | 3  | 3  |   |
| ENSP00000310127                            | ENSG00000126456 | IRF3     | 29  | 3  | 1  | 2  | 2  | 3  | 1  | 2  | 0  | 1  | 0  | 1  | 1  | 0  | 0  | 1  | 0  | 0  | 1  | 2  | 1  | 1  | 0  | 1  | 0  | 0  | 1  | 1  | 1  | 1  | 1  |   |
| ENSP00000310129                            | ENSG00000175166 | PSMD2    | 340 | 15 | 9  | 5  | 4  | 4  | 7  | 7  | 6  | 10 | 1  | 22 | 8  | 8  | 1  | 9  | 13 | 11 | 14 | 11 | 14 | 13 | 4  | 15 | 8  | 11 | 22 | 10 | 22 | 30 | 26 |   |
| ENSP00000310219                            | ENSG00000173110 | HSPA6    | 964 | 34 | 19 | 25 | 46 | 49 | 26 | 52 | 46 | 20 | 15 | 22 | 16 | 26 | 45 | 20 | 46 | 60 | 28 | 39 | 48 | 26 | 26 | 32 | 20 | 33 | 34 | 21 | 29 | 38 | 23 |   |
| ENSP00000310275                            | ENSG00000175334 | BANF1    | 170 | 7  | 7  | 2  | 3  | 4  | 8  | 2  | 2  | 10 | 4  | 11 | 4  | 6  | 2  | 6  | 5  | 4  | 5  | 2  | 2  | 5  | 3  | 9  | 8  | 8  | 8  | 7  | 5  | 14 | 3  |   |
| ENSP00000310301                            | ENSG00000172845 | SP3      | 31  | 2  | 1  | 0  | 1  | 0  | 2  | 2  | 0  | 1  | 0  | 1  | 1  | 0  | 1  | 0  | 1  | 0  | 2  | 3  | 1  | 1  | 0  | 3  | 2  | 0  | 0  | 1  | 0  | 1  | 0  |   |
| ENSP00000310440,ENSP000001:ENSG00000130724 | 119             | 7        | 2   | 6  | 3  | 8  | 5  | 4  | 4  | 3  | 2  | 5  | 3  | 1  | 0  | 5  | 3  | 4  | 4  | 5  | 8  | 6  | 2  | 4  | 3  | 4  | 5  | 3  | 4  | 3  | 3  |    |    |   |
| ENSP00000310448                            | ENSG00000175467 | SART1    | 432 | 21 | 12 | 18 | 11 | 10 | 11 | 15 | 11 | 11 | 17 | 17 | 17 | 10 | 16 | 16 | 9  | 18 | 13 | 14 | 16 | 13 | 21 | 25 | 13 | 13 | 16 | 8  | 16 | 13 | 11 |   |
| ENSP00000310471                            | ENSG00000173914 | RBM4B    | 184 | 10 | 7  | 6  | 6  | 4  | 6  | 4  | 7  | 5  | 4  | 8  | 6  | 6  | 2  | 8  | 2  | 4  | 6  | 9  | 6  | 9  | 5  | 7  | 8  | 6  | 7  | 5  | 7  | 9  | 5  |   |
| ENSP00000310491                            | ENSG00000175220 | ARHGAP1  | 89  | 2  | 3  | 1  | 4  | 2  | 5  | 3  | 3  | 2  | 0  | 5  | 0  | 3  | 1  | 3  | 4  | 3  | 5  | 2  | 4  | 3  | 0  | 2  | 2  | 4  | 7  | 4  | 2  | 6  | 4  |   |
| ENSP00000310520,ENSP000001:ENSG00000175595 | 19              | 0        | 0   | 0  | 1  | 0  | 0  | 0  | 0  | 0  | 1  | 0  | 1  | 1  | 1  | 1  | 1  | 2  | 0  | 2  | 3  | 3  | 0  | 0  | 0  | 0  | 0  | 0  | 1  | 0  | 0  | 0  | 1  |   |
| ENSP00000310521                            | ENSG00000121542 | SEC22A   | 10  | 0  | 0  | 0  | 1  | 0  | 0  | 1  | 0  | 1  | 0  | 0  | 0  | 0  | 0  | 0  | 0  | 2  | 1  | 0  | 0  | 0  | 0  | 0  | 0  | 1  | 0  | 1  | 0  | 0  | 0  |   |
| ENSP00000310572,ENSP000001:ENSG00000087191 | 594             | 25       | 24  | 13 | 19 | 15 | 14 | 25 | 4  | 19 | 5  | 25 | 19 | 24 | 11 | 25 | 21 | 21 | 17 | 27 | 21 | 22 | 12 | 20 | 11 | 29 | 30 | 18 | 22 | 31 | 25 |    |    |   |
| ENSP00000310590                            | ENSG00000055483 | USP36    | 25  | 0  | 0  | 1  | 0  | 0  | 0  | 1  | 0  | 0  | 1  | 0  | 3  | 0  | 2  | 1  | 0  | 0  | 2  | 1  | 2  | 0  | 2  | 1  | 0  | 1  | 0  | 0  | 3  | 2  | 2  |   |
| ENSP00000310593                            | ENSG00000164114 | MAP9     | 12  | 0  | 0  | 0  | 0  | 1  | 1  | 1  | 0  | 1  | 0  | 0  | 0  | 0  | 0  | 0  | 0  | 0  | 2  | 0  | 0  | 0  | 0  | 2  | 0  | 0  | 0  | 0  | 3  | 1  | 0  |   |
| ENSP00000310623,ENSP000001:ENSG00000136003 | 10              | 0        | 0   | 0  | 0  | 0  | 1  | 0  | 1  | 0  | 0  | 0  | 0  | 0  | 0  | 0  | 0  | 0  | 0  | 1  | 0  | 1  | 2  | 0  | 0  | 1  | 1  | 0  | 0  | 0  | 1  | 1  |    |   |
| ENSP00000310668                            | ENSG00000102900 | NUP93    | 496 | 24 | 15 | 19 | 21 | 22 | 14 | 20 | 11 | 11 | 8  | 21 | 15 | 18 | 9  | 14 | 15 | 14 | 12 | 18 | 21 | 10 | 23 | 28 | 10 | 20 | 16 | 9  | 21 | 20 | 17 |   |
| ENSP00000310670,ENSP000001:ENSG00000158941 | 282             | 14       | 6   | 10 | 5  | 6  | 3  | 3  | 6  | 3  | 11 | 18 | 10 | 5  | 9  | 10 | 5  | 7  | 9  | 4  | 22 | 12 | 7  | 12 | 4  | 14 | 17 | 8  | 10 | 20 | 12 |    |    |   |
| ENSP00000310685                            | ENSG00000134686 | PHC2     | 62  | 2  | 2  | 1  | 1  | 2  | 1  | 2  | 1  | 3  | 0  | 3  | 2  | 2  | 1  | 3  | 2  | 3  | 2  | 1  | 3  | 1  | 3  | 4  | 2  | 1  | 3  | 2  | 3  | 3  | 3  |   |
| ENSP00000310688                            | ENSG00000173208 | ABCD2    | 10  | 0  | 0  | 1  | 1  | 1  | 1  | 2  | 0  | 0  | 0  | 1  | 2  | 0  | 0  | 0  | 0  | 1  | 0  | 0  | 1  | 0  | 0  | 0  | 0  | 0  | 0  | 0  | 0  | 0  | 0  |   |
| ENSP00000310723                            | ENSG00000174243 | DDX23    | 408 | 17 | 11 | 18 | 8  | 9  | 13 | 10 | 11 | 9  | 15 | 20 | 14 | 9  | 8  | 11 | 11 | 15 | 12 | 10 | 9  | 11 | 32 | 28 | 18 | 17 | 14 | 6  | 17 | 13 | 12 |   |
| ENSP00000310749,ENSP000001:ENSG00000115756 | 138             | 3        | 2   | 2  | 8  | 10 | 6  | 7  | 6  | 6  | 4  | 8  | 5  | 3  | 4  | 4  | 8  | 10 | 3  | 4  | 3  | 3  | 2  | 4  | 2  | 4  | 5  | 3  | 1  | 4  | 4  | 4  |    |   |
| ENSP00000310785                            | ENSG00000175110 | MRPS22   | 168 | 5  | 4  | 5  | 4  | 8  | 5  | 7  | 5  | 5  | 2  | 4  | 5  | 4  | 2  | 7  | 6  | 5  | 6  | 7  | 10 | 5  | 7  | 9  | 10 | 8  | 6  | 4  | 4  | 5  | 4  |   |
| ENSP00000310861                            | ENSG00000172867 | KRT2     | 326 | 10 | 13 | 0  | 9  | 4  | 20 | 7  | 13 | 9  | 6  | 51 | 50 | 5  | 0  | 12 | 1  | 5  | 16 | 5  | 5  | 10 | 2  | 9  | 21 | 2  | 1  | 17 | 3  | 3  | 17 |   |
| ENSP00000310901                            | ENSG00000175183 | CSRP2    | 12  | 2  | 1  | 1  | 0  | 0  | 0  | 0  | 0  | 0  | 0  | 1  | 1  | 0  | 0  | 1  | 0  | 1  | 3  | 0  | 0  | 0  | 0  | 1  | 0  | 0  | 0  | 0  | 0  | 0  | 0  |   |
| ENSP00000310935,ENSP000001:ENSG00000173486 | 73              | 4        | 1   | 3  | 1  | 3  | 4  | 4  | 2  | 3  | 2  | 4  | 2  | 3  | 3  | 3  | 1  | 3  | 2  | 3  | 2  | 4  | 3  | 3  | 4  | 1  | 0  | 1  | 1  | 2  | 1  | 2  |    |   |
| ENSP00000310966                            | ENSG00000117877 | CD3EAP   | 62  | 2  | 2  | 1  | 0  | 0  | 0  | 4  | 0  | 4  | 7  | 2  | 2  | 1  | 5  | 0  | 4  | 2  | 1  | 2  | 4  | 1  | 5  | 2  | 3  | 1  | 2  | 0  | 1  | 2  | 2  |   |
| ENSP00000310984,ENSP000001:ENSG00000165322 | 18              | 1        | 1   | 1  | 0  | 0  | 0  | 1  | 1  | 1  | 0  | 1  | 0  | 0  | 0  | 0  | 0  | 0  | 0  | 1  | 2  | 1  | 0  | 0  | 0  | 1  | 3  | 1  | 0  | 1  | 0  | 1  | 0  |   |
| ENSP00000311028,ENSP000001:ENSG00000164587 | 529             | 24       | 13  | 21 | 13 | 33 | 13 | 17 | 1  |    |    |    |    |    |    |    |    |    |    |    |    |    |    |    |    |    |    |    |    |    |    |    |    |   |

[illegible]

|                                 |                  |          |      |    |    |    |    |    |    |    |    |    |    |    |    |    |    |    |    |    |    |    |    |    |    |    |    |    |    |    |    |    |    |   |
|---------------------------------|------------------|----------|------|----|----|----|----|----|----|----|----|----|----|----|----|----|----|----|----|----|----|----|----|----|----|----|----|----|----|----|----|----|----|---|
| ENSP00000316032                 | ENSG00000110713  | NUP98    | 390  | 20 | 13 | 11 | 12 | 12 | 12 | 16 | 11 | 15 | 8  | 21 | 16 | 11 | 11 | 12 | 12 | 10 | 12 | 11 | 12 | 10 | 15 | 22 | 14 | 13 | 11 | 12 | 11 | 14 | 10 |   |
| ENSP00000316042                 | ENSG00000177733  | HNRPNA0  | 181  | 5  | 7  | 3  | 6  | 5  | 4  | 3  | 2  | 6  | 3  | 10 | 5  | 4  | 2  | 10 | 1  | 8  | 10 | 7  | 5  | 5  | 7  | 9  | 8  | 7  | 7  | 6  | 5  | 13 | 8  |   |
| ENSP00000316145,ENSP00000316145 | ENSG00000104413  | ESRP1    | 97   | 7  | 4  | 2  | 8  | 7  | 7  | 4  | 6  | 3  | 1  | 8  | 3  | 1  | 0  | 0  | 7  | 9  | 7  | 1  | 0  | 0  | 0  | 0  | 5  | 4  | 3  | 0  | 0  | 0  |    |   |
| ENSP00000316176                 | ENSG00000177889  | UBE2N    | 177  | 8  | 7  | 5  | 4  | 5  | 7  | 3  | 2  | 5  | 5  | 5  | 5  | 5  | 5  | 7  | 11 | 8  | 5  | 5  | 6  | 5  | 4  | 7  | 3  | 6  | 8  | 6  | 7  | 10 | 8  |   |
| ENSP00000316203,ENSP00000316203 | ENSG00000100003  | SEC14L2  | 12   | 0  | 0  | 0  | 2  | 2  | 1  | 0  | 0  | 0  | 0  | 0  | 0  | 0  | 0  | 1  | 3  | 1  | 1  | 0  | 0  | 0  | 0  | 0  | 0  | 0  | 0  | 0  | 1  | 0  |    |   |
| ENSP00000316291,ENSP00000316291 | ENSG00000122257  | RBBP6    | 79   | 1  | 0  | 4  | 2  | 2  | 1  | 3  | 0  | 0  | 4  | 3  | 1  | 5  | 4  | 4  | 2  | 4  | 2  | 5  | 5  | 3  | 5  | 6  | 4  | 3  | 1  | 0  | 2  | 3  | 0  |   |
| ENSP00000316357,ENSP00000316357 | ENSG00000124486  | USP9X    | 232  | 12 | 9  | 6  | 11 | 8  | 5  | 10 | 7  | 5  | 2  | 3  | 3  | 6  | 2  | 8  | 9  | 9  | 3  | 15 | 13 | 11 | 1  | 10 | 3  | 6  | 13 | 7  | 14 | 14 | 7  |   |
| ENSP00000316454                 | ENSG00000175115  | PACS1    | 12   | 1  | 2  | 0  | 0  | 0  | 0  | 1  | 0  | 0  | 1  | 0  | 0  | 0  | 1  | 0  | 0  | 1  | 0  | 0  | 1  | 0  | 0  | 0  | 1  | 0  | 0  | 0  | 1  | 1  | 1  |   |
| ENSP00000316464,ENSP00000316464 | ENSG00000142765  | SYTL1    | 15   | 0  | 0  | 0  | 1  | 1  | 0  | 2  | 1  | 0  | 0  | 1  | 0  | 0  | 0  | 0  | 0  | 1  | 0  | 1  | 0  | 0  | 0  | 0  | 0  | 0  | 4  | 2  | 1  | 0  | 0  |   |
| ENSP00000316543,ENSP00000316543 | ENSG00000173166  | RAPH1    | 18   | 5  | 2  | 1  | 2  | 0  | 0  | 1  | 0  | 0  | 0  | 0  | 0  | 2  | 0  | 2  | 0  | 0  | 0  | 1  | 0  | 1  | 0  | 1  | 0  | 0  | 0  | 0  | 0  | 0  | 0  |   |
| ENSP00000316578                 | ENSG00000178691  | SUZ12    | 65   | 2  | 0  | 2  | 3  | 2  | 1  | 5  | 2  | 1  | 2  | 2  | 2  | 2  | 3  | 2  | 0  | 2  | 3  | 3  | 3  | 3  | 2  | 2  | 2  | 1  | 1  | 0  | 4  | 4  | 4  |   |
| ENSP00000316589                 | ENSG00000141084  | RANBP10  | 27   | 2  | 1  | 1  | 1  | 0  | 1  | 1  | 0  | 1  | 1  | 0  | 1  | 0  | 0  | 1  | 0  | 1  | 2  | 1  | 1  | 1  | 1  | 1  | 1  | 1  | 1  | 1  | 2  | 1  | 1  |   |
| ENSP00000316598                 | ENSG00000178605  | GTPBP6   | 17   | 3  | 2  | 0  | 0  | 0  | 0  | 1  | 2  | 2  | 0  | 1  | 0  | 0  | 0  | 0  | 0  | 0  | 0  | 1  | 1  | 1  | 0  | 1  | 0  | 0  | 0  | 0  | 0  | 1  | 1  |   |
| ENSP00000316632,ENSP00000316632 | ENSG00000156958  | GALK2    | 29   | 1  | 0  | 0  | 1  | 3  | 2  | 1  | 2  | 1  | 0  | 0  | 1  | 1  | 0  | 1  | 1  | 0  | 0  | 1  | 1  | 1  | 1  | 1  | 0  | 1  | 2  | 3  | 1  | 1  | 1  |   |
| ENSP00000316651,ENSP00000316651 | ENSG000000086200 | IPO11    | 55   | 3  | 1  | 1  | 3  | 0  | 1  | 2  | 0  | 1  | 0  | 1  | 0  | 3  | 0  | 1  | 2  | 2  | 4  | 4  | 3  | 3  | 1  | 3  | 1  | 1  | 3  | 3  | 1  | 3  | 4  |   |
| ENSP00000316809                 | ENSG00000174238  | PITPNA   | 44   | 2  | 2  | 1  | 3  | 1  | 1  | 0  | 0  | 0  | 0  | 1  | 0  | 1  | 1  | 0  | 4  | 2  | 2  | 4  | 2  | 2  | 1  | 0  | 2  | 0  | 1  | 4  | 0  | 1  | 2  | 6 |
| ENSP00000316842                 | ENSG00000177045  | SIX5     | 33   | 0  | 1  | 0  | 0  | 0  | 0  | 1  | 8  | 1  | 1  | 0  | 0  | 0  | 0  | 1  | 0  | 0  | 2  | 1  | 3  | 2  | 4  | 0  | 1  | 0  | 0  | 2  | 2  | 2  | 1  |   |
| ENSP00000316854                 | ENSG00000177556  | ATOX1    | 41   | 4  | 4  | 0  | 5  | 1  | 2  | 1  | 0  | 0  | 0  | 1  | 1  | 1  | 0  | 2  | 2  | 0  | 0  | 4  | 1  | 2  | 0  | 0  | 0  | 1  | 3  | 2  | 1  | 2  | 1  |   |
| ENSP00000316905                 | ENSG00000164466  | SFXN1    | 120  | 5  | 4  | 0  | 2  | 4  | 6  | 3  | 4  | 3  | 4  | 6  | 3  | 5  | 7  | 5  | 4  | 5  | 5  | 4  | 5  | 8  | 4  | 4  | 3  | 4  | 3  | 3  | 2  | 4  | 1  |   |
| ENSP00000316924                 | ENSG00000154930  | ACSS1    | 75   | 3  | 3  | 4  | 0  | 0  | 0  | 7  | 7  | 6  | 1  | 4  | 1  | 0  | 0  | 2  | 0  | 0  | 0  | 1  | 1  | 1  | 3  | 7  | 6  | 3  | 6  | 6  | 0  | 0  | 1  |   |
| ENSP00000316950,ENSP00000316950 | ENSG00000104177  | MYEF2    | 19   | 1  | 1  | 1  | 0  | 0  | 0  | 3  | 3  | 2  | 1  | 3  | 2  | 0  | 0  | 0  | 0  | 0  | 0  | 0  | 0  | 0  | 0  | 0  | 0  | 1  | 0  | 0  | 0  | 0  | 1  |   |
| ENSP00000316974                 | ENSG00000064042  | LIMCH1   | 10   | 0  | 0  | 0  | 1  | 0  | 0  | 1  | 0  | 1  | 0  | 0  | 0  | 1  | 0  | 2  | 0  | 0  | 0  | 1  | 0  | 0  | 1  | 0  | 0  | 1  | 0  | 1  | 0  | 1  | 0  |   |
| ENSP00000316990                 | ENSG00000181029  | TRAPPC5  | 17   | 0  | 1  | 0  | 1  | 0  | 1  | 1  | 1  | 1  | 0  | 0  | 0  | 1  | 0  | 0  | 0  | 1  | 1  | 1  | 1  | 1  | 0  | 0  | 0  | 1  | 1  | 1  | 0  | 1  | 1  |   |
| ENSP00000317053                 | ENSG00000102804  | TSC22D1  | 32   | 2  | 1  | 1  | 3  | 2  | 2  | 2  | 0  | 1  | 0  | 1  | 1  | 2  | 0  | 1  | 1  | 2  | 3  | 1  | 0  | 2  | 0  | 0  | 1  | 1  | 0  | 0  | 0  | 1  | 1  |   |
| ENSP00000317088                 | ENSG00000188014  |          | 18   | 0  | 0  | 1  | 0  | 0  | 0  | 1  | 2  | 0  | 0  | 2  | 0  | 1  | 1  | 0  | 0  | 2  | 1  | 1  | 0  | 0  | 0  | 0  | 1  | 3  | 0  | 1  | 0  | 0  | 1  |   |
| ENSP00000317123                 | ENSG00000144028  | SNRNP200 | 1421 | 60 | 48 | 32 | 27 | 36 | 40 | 32 | 28 | 44 | 26 | 83 | 46 | 40 | 16 | 49 | 51 | 52 | 54 | 44 | 48 | 58 | 48 | 82 | 57 | 41 | 53 | 44 | 48 | 75 | 59 |   |
| ENSP00000317144                 | ENSG00000083535  | PIBF1    | 21   | 1  | 0  | 1  | 1  | 1  | 0  | 0  | 0  | 0  | 0  | 0  | 0  | 1  | 3  | 0  | 1  | 3  | 0  | 2  | 0  | 0  | 2  | 0  | 0  | 1  | 0  | 1  | 2  | 1  | 0  |   |
| ENSP00000317159                 | ENSG00000179091  | CYC1     | 54   | 0  | 0  | 0  | 1  | 1  | 1  | 1  | 1  | 2  | 2  | 4  | 1  | 2  | 0  | 0  | 1  | 7  | 1  | 4  | 0  | 2  | 2  | 4  | 6  | 3  | 2  | 2  | 1  | 0  | 2  | 1 |
| ENSP00000317224,ENSP00000317224 | ENSG00000179134  | SAMD4B   | 10   | 0  | 2  | 0  | 0  | 0  | 0  | 1  | 0  | 0  | 0  | 0  | 0  | 0  | 0  | 1  | 0  | 1  | 1  | 1  | 1  | 0  | 0  | 1  | 1  | 0  | 0  | 0  | 0  | 0  | 0  |   |
| ENSP00000317232                 | ENSG00000141756  | FKBP10   | 143  | 15 | 8  | 11 | 0  | 0  | 1  | 13 | 5  | 5  | 9  | 4  | 6  | 0  | 0  | 0  | 4  | 9  | 6  | 2  | 2  | 1  | 0  | 0  | 0  | 2  | 0  | 1  | 15 | 12 | 12 |   |
| ENSP00000317300                 | ENSG00000176454  | LCAT4    | 29   | 0  | 1  | 0  | 2  | 2  | 1  | 4  | 2  | 0  | 0  | 0  | 2  | 0  | 0  | 0  | 1  | 4  | 1  | 0  | 0  | 1  | 0  | 1  | 0  | 1  | 1  | 2  | 1  | 0  | 0  |   |
| ENSP00000317334                 | ENSG00000120438  | TCP1     | 892  | 43 | 33 | 12 | 18 | 21 | 25 | 22 | 10 | 29 | 8  | 46 | 16 | 28 | 10 | 30 | 40 | 38 | 47 | 29 | 25 | 46 | 12 | 38 | 27 | 30 | 47 | 33 | 31 | 57 | 41 |   |
| ENSP00000317362,ENSP00000317362 | ENSG00000137509  | PRCP     | 19   | 1  | 2  | 0  | 0  | 0  | 0  | 0  | 0  | 0  | 0  | 1  | 1  | 0  | 1  | 1  | 1  | 2  | 0  | 1  | 1  | 1  | 2  | 0  | 0  | 1  | 0  | 1  | 0  | 0  | 2  | 1 |
| ENSP00000317379                 | ENSG00000115419  | GLS      | 138  | 7  | 4  | 3  | 2  | 1  | 3  | 0  | 1  | 2  | 3  | 12 | 4  | 3  | 2  | 10 | 1  | 0  | 2  | 5  | 5  | 4  | 4  | 8  | 7  | 6  | 9  | 6  | 9  | 8  | 7  |   |
| ENSP00000317399                 | ENSG00000104529  | EEF1D    | 329  | 22 | 12 | 10 | 6  | 10 | 9  | 10 | 3  | 10 | 3  | 15 | 7  | 8  | 8  | 11 | 11 | 12 | 11 | 8  | 17 | 8  | 7  | 12 | 8  | 10 | 21 | 14 | 13 | 21 | 12 |   |
| ENSP00000317468                 | ENSG00000176108  | CHMP6    | 25   | 2  | 1  | 1  | 2  | 2  | 2  | 2  | 2  | 3  | 1  | 0  | 1  | 1  | 2  | 2  | 2  | 4  | 2  | 1  | 1  | 2  | 2  | 3  | 5  | 1  | 1  | 3  | 1  | 1  | 2  | 2 |
| ENSP00000317473                 | ENSG00000137955  | RABGGTB  | 47   | 2  | 0  | 2  | 2  | 2  | 1  | 2  | 1  | 0  | 0  | 0  | 0  | 3  | 2  | 1  | 3  | 2  | 2  | 3  | 3  | 1  | 0  | 3  | 0  | 2  | 4  | 1  | 1  | 2  | 2  |   |
| ENSP00000317487,ENSP00000317487 | ENSG00000166037  | CEP57    | 13   | 0  | 1  | 1  | 0  | 0  | 1  | 0  | 1  | 0  | 1  | 0  | 1  | 0  | 0  | 1  | 1  | 1  | 0  | 1  | 0  | 1  | 0  | 1  | 1  | 0  | 0  | 0  | 0  | 0  | 0  |   |
| ENSP00000317578                 | ENSG00000100077  | ADRBK2   | 28   | 0  | 1  | 1  | 3  | 1  | 1  | 1  | 0  | 0  | 0  | 1  | 0  | 2  | 1  | 0  | 1  | 2  | 1  | 1  | 1  | 0  | 0  | 1  | 0  | 3  | 2  | 2  | 1  | 1  | 0  |   |
| ENSP00000317579                 | ENSG00000140688  | C16orf58 | 14   | 1  | 0  | 0  | 1  | 1  | 1  | 1  | 1  | 0  | 0  | 0  | 1  | 0  | 0  | 0  | 0  | 1  | 1  | 0  | 1  | 0  | 0  | 0  | 0  | 1  | 1  | 1  | 0  | 0  | 0  |   |
| ENSP00000317618                 | ENSG00000136480  | POLG2    | 15   | 1  | 1  | 0  | 0  | 0  | 0  | 0  | 0  | 1  | 0  | 2  | 1  | 0  | 0  | 0  | 1  | 1  | 1  | 0  | 0  | 0  | 0  | 1  | 0  | 1  | 1  | 0  | 1  | 0  | 0  | 2 |
| ENSP00000317636                 | ENSG00000108469  | RECQL5   | 10   | 0  | 1  | 0  | 1  | 0  | 2  | 0  | 0  | 0  | 0  | 1  | 0  | 0  | 0  | 0  | 0  | 1  | 0  | 1  | 0  | 0  | 0  | 0  | 1  | 0  | 0  | 0  | 0  | 1  | 2  |   |
| ENSP00000317780                 | ENSG00000178741  | COX5A    | 213  | 10 | 5  | 11 | 5  | 6  | 5  | 7  | 5  | 5  | 10 | 5  | 6  | 7  | 9  | 6  | 4  | 10 | 4  | 5  | 7  | 4  | 14 | 13 | 9  | 12 | 7  | 5  | 9  | 5  | 3  |   |
| ENSP00000317786                 | ENSG00000133030  | MPRIAP   | 83   | 0  | 2  | 2  | 0  | 0  | 1  | 3  | 0  | 3  | 3  | 5  | 4  | 8  | 2  | 3  | 1  | 2  | 0  | 4  | 1  | 3  | 6  | 12 | 10 | 2  | 2  | 2  | 0  | 1  | 1  |   |
| ENSP00000317904,ENSP00000317904 | ENSG00000104812  | GYSI     | 96   | 5  | 0  | 0  | 3  | 1  | 2  | 7  | 3  | 5  | 0  | 0  | 0  | 1  | 4  | 1  | 7  | 4  | 3  | 7  | 3  | 2  | 4  | 2  | 3  | 3  | 6  | 4  | 3  | 2  | 4  | 7 |
| ENSP00000317912                 | ENSG00000178078  | STAP2    | 10   | 1  | 0  | 0  | 0  | 0  | 0  | 0  | 1  | 0  | 0  | 0  | 0  | 0  | 0  | 0  | 0  | 0  | 0  | 1  | 4  | 1  | 0  | 0  | 0  | 2  | 0  | 0  | 0  | 0  | 0  |   |
| ENSP00000317955                 | ENSG00000102189  | EEA1     | 628  | 38 | 25 | 33 | 1  | 3  | 3  | 22 | 14 | 13 | 9  | 26 | 13 | 33 | 23 | 28 | 12 | 17 | 10 | 25 | 29 | 24 | 27 | 38 | 28 | 23 | 20 | 13 | 25 | 30 | 23 |   |
| ENSP00000317992                 | ENSG00000188976  | NOC2L    | 100  | 2  | 3  | 2  | 2  | 2  | 1  | 4  | 2  | 1  | 2  | 5  | 3  | 2  | 6  | 7  | 2  | 4  | 5  | 4  | 2  | 5  | 2  | 3  | 6  | 2  | 2  | 3  | 4  | 6  | 6  |   |
| ENSP00000318016,ENSP00000318016 | ENSG00000164961  | KIAA0196 | 83   | 2  | 1  | 3  | 3  | 5  | 6  | 5  | 3  | 1  | 1  | 2  | 1  | 4  | 2  | 1  | 4  | 2  | 3  | 3  | 4  | 3  | 1  | 2  | 2  | 4  | 3  | 4  | 3  | 4  | 1  |   |
| ENSP00000318024                 | ENSG00000176623  | FAM82B   | 94   | 1  | 5  | 1  | 0  | 1  | 3  | 1  | 1  | 3  | 1  | 8  | 2  | 2  | 3  | 4  | 8  | 9  | 4  | 2  | 1  | 2  | 4  | 4  | 4  | 3  | 4  | 2  | 1  | 6  | 4  |   |
| ENSP00000318089                 | ENSG00000145012  | LPP      | 35   | 1  | 1  | 1  | 3  | 3  | 1  | 2  | 0  | 0  | 0  | 1  | 0  | 1  | 0  | 1  | 0  | 1  | 2  | 4  | 0  | 1  | 1  | 2  | 0  |    |    |    |    |    |    |   |

|                                            |                 |      |    |    |    |    |    |    |    |    |    |    |    |    |    |    |    |    |    |    |    |    |    |    |    |    |    |    |    |    |    |    |   |
|--------------------------------------------|-----------------|------|----|----|----|----|----|----|----|----|----|----|----|----|----|----|----|----|----|----|----|----|----|----|----|----|----|----|----|----|----|----|---|
| ENSP00000319412,ENSP000003:ENSG00000170632 | ARMC10          | 11   | 0  | 0  | 0  | 0  | 0  | 0  | 0  | 0  | 1  | 1  | 2  | 2  | 0  | 0  | 0  | 0  | 0  | 0  | 0  | 0  | 0  | 0  | 1  | 1  | 0  | 0  | 0  | 1  | 1  | 0  | 1 |
| ENSP00000319417                            | ENSG00000165480 | 30   | 1  | 1  | 4  | 0  | 1  | 0  | 0  | 0  | 0  | 0  | 0  | 1  | 2  | 4  | 2  | 0  | 1  | 0  | 3  | 4  | 2  | 0  | 0  | 0  | 0  | 0  | 0  | 1  | 1  | 0  | 1 |
| ENSP00000319501                            | ENSG00000109814 | 347  | 20 | 11 | 13 | 11 | 21 | 13 | 14 | 8  | 8  | 4  | 9  | 4  | 16 | 14 | 13 | 11 | 10 | 6  | 11 | 10 | 5  | 7  | 13 | 4  | 28 | 27 | 17 | 7  | 7  | 5  |   |
| ENSP00000319531                            | ENSG00000140905 | 106  | 10 | 5  | 4  | 2  | 3  | 1  | 4  | 3  | 4  | 2  | 5  | 1  | 3  | 2  | 3  | 7  | 3  | 5  | 3  | 4  | 4  | 2  | 5  | 5  | 3  | 5  | 3  | 2  | 3  | 0  |   |
| ENSP00000319664                            | ENSG00000090273 | 671  | 26 | 15 | 21 | 25 | 21 | 18 | 19 | 15 | 18 | 9  | 16 | 14 | 11 | 29 | 25 | 18 | 29 | 25 | 25 | 37 | 18 | 16 | 24 | 9  | 25 | 24 | 9  | 46 | 44 | 0  |   |
| ENSP00000319673,ENSP000003:ENSG00000188092 | GPR89B          | 29   | 2  | 1  | 2  | 1  | 2  | 2  | 1  | 0  | 0  | 0  | 1  | 2  | 1  | 0  | 0  | 0  | 1  | 0  | 2  | 1  | 0  | 0  | 1  | 1  | 1  | 1  | 1  | 2  | 1  | 2  | 1 |
| ENSP00000319690,ENSP000003:ENSG00000092199 | HNRNPC          | 1134 | 33 | 26 | 31 | 25 | 41 | 30 | 28 | 34 | 24 | 32 | 47 | 36 | 27 | 34 | 32 | 29 | 45 | 40 | 46 | 50 | 37 | 55 | 61 | 38 | 46 | 51 | 26 | 46 | 49 | 35 |   |
| ENSP00000319742,ENSP000003:ENSG00000114439 | BBX             | 11   | 0  | 0  | 0  | 0  | 1  | 0  | 0  | 0  | 0  | 0  | 0  | 0  | 0  | 1  | 0  | 0  | 1  | 0  | 1  | 2  | 0  | 1  | 1  | 0  | 0  | 0  | 1  | 1  | 0  | 1  |   |
| ENSP00000319771                            | ENSG00000134987 | 225  | 5  | 6  | 6  | 5  | 3  | 4  | 7  | 6  | 7  | 4  | 9  | 6  | 5  | 5  | 8  | 7  | 14 | 10 | 11 | 7  | 7  | 8  | 14 | 11 | 7  | 9  | 6  | 8  | 10 | 10 |   |
| ENSP00000319788,ENSP000003:ENSG00000181019 | NQO1            | 73   | 0  | 0  | 0  | 1  | 6  | 8  | 4  | 1  | 2  | 0  | 1  | 0  | 0  | 0  | 1  | 2  | 3  | 2  | 4  | 5  | 6  | 1  | 0  | 0  | 10 | 7  | 6  | 2  | 1  | 0  |   |
| ENSP00000319799                            | ENSG00000178804 | 65   | 1  | 3  | 1  | 2  | 3  | 1  | 1  | 2  | 2  | 2  | 4  | 3  | 1  | 2  | 2  | 0  | 3  | 6  | 2  | 2  | 3  | 3  | 3  | 2  | 3  | 2  | 1  | 1  | 2  | 2  |   |
| ENSP00000319814                            | ENSG00000124253 | 14   | 0  | 0  | 0  | 5  | 4  | 3  | 0  | 0  | 0  | 0  | 0  | 0  | 0  | 0  | 0  | 0  | 0  | 0  | 0  | 0  | 0  | 0  | 0  | 2  | 0  | 0  | 0  | 0  | 0  |    |   |
| ENSP00000319817                            | ENSG00000125741 | 29   | 2  | 0  | 1  | 1  | 1  | 0  | 1  | 1  | 1  | 1  | 1  | 1  | 1  | 1  | 1  | 1  | 1  | 1  | 1  | 1  | 1  | 1  | 1  | 2  | 1  | 1  | 0  | 1  | 1  | 1  |   |
| ENSP00000319831                            | ENSG00000023892 | 17   | 0  | 0  | 0  | 1  | 0  | 0  | 1  | 0  | 0  | 0  | 1  | 0  | 0  | 0  | 0  | 1  | 1  | 0  | 0  | 0  | 0  | 1  | 0  | 0  | 3  | 4  | 0  | 0  | 3  | 1  |   |
| ENSP00000319851                            | ENSG00000016391 | 101  | 7  | 4  | 7  | 6  | 4  | 5  | 4  | 4  | 3  | 4  | 2  | 1  | 1  | 0  | 3  | 2  | 4  | 0  | 2  | 5  | 2  | 2  | 6  | 5  | 5  | 6  | 2  | 3  | 0  | 2  |   |
| ENSP00000319859,ENSP000003:ENSG00000171903 | AC005336        | 19   | 1  | 0  | 0  | 1  | 0  | 1  | 0  | 0  | 1  | 0  | 0  | 0  | 0  | 0  | 1  | 2  | 1  | 0  | 1  | 0  | 1  | 1  | 2  | 1  | 0  | 4  | 1  | 0  | 0  | 0  |   |
| ENSP00000319910                            | ENSG00000149100 | 332  | 16 | 10 | 9  | 8  | 5  | 15 | 7  | 3  | 7  | 3  | 15 | 9  | 13 | 9  | 11 | 17 | 14 | 12 | 13 | 8  | 11 | 1  | 13 | 8  | 21 | 16 | 8  | 10 | 22 | 18 |   |
| ENSP00000319918                            | ENSG00000129636 | 11   | 1  | 1  | 0  | 0  | 1  | 1  | 0  | 0  | 0  | 0  | 1  | 0  | 0  | 0  | 0  | 1  | 0  | 1  | 1  | 0  | 0  | 0  | 1  | 1  | 0  | 1  | 0  | 0  | 0  | 0  |   |
| ENSP00000319975                            | ENSG00000175470 | 50   | 0  | 2  | 0  | 2  | 0  | 3  | 1  | 0  | 1  | 1  | 3  | 0  | 1  | 1  | 4  | 1  | 0  | 2  | 0  | 1  | 4  | 1  | 4  | 1  | 0  | 2  | 2  | 0  | 6  | 7  |   |
| ENSP00000320043,ENSP000003:ENSG00000120992 | LYPLA1          | 71   | 1  | 4  | 1  | 2  | 3  | 2  | 3  | 4  | 2  | 2  | 1  | 1  | 4  | 1  | 0  | 4  | 1  | 2  | 2  | 3  | 3  | 1  | 4  | 3  | 1  | 4  | 3  | 1  | 6  | 4  | 3 |
| ENSP00000320083                            | ENSG00000077616 | 39   | 12 | 10 | 15 | 0  | 0  | 0  | 0  | 0  | 0  | 0  | 0  | 0  | 0  | 0  | 0  | 0  | 0  | 0  | 0  | 0  | 0  | 0  | 0  | 0  | 0  | 1  | 0  | 0  | 1  | 0  |   |
| ENSP00000320087                            | ENSG00000177119 | 13   | 0  | 3  | 1  | 0  | 1  | 0  | 0  | 0  | 1  | 0  | 1  | 1  | 0  | 0  | 0  | 0  | 0  | 0  | 0  | 0  | 0  | 2  | 0  | 1  | 1  | 0  | 0  | 1  | 0  | 0  |   |
| ENSP00000320108,ENSP000003:ENSG00000163694 | RBM47           | 102  | 1  | 2  | 0  | 5  | 4  | 5  | 7  | 2  | 9  | 0  | 0  | 0  | 3  | 1  | 4  | 0  | 1  | 0  | 6  | 4  | 8  | 0  | 4  | 8  | 9  | 8  | 11 | 0  | 0  | 0  | 0 |
| ENSP00000320116,ENSP000003:ENSG00000181396 | C17orf101       | 13   | 0  | 1  | 0  | 0  | 1  | 0  | 1  | 1  | 0  | 0  | 0  | 1  | 1  | 0  | 1  | 1  | 1  | 0  | 1  | 1  | 1  | 0  | 0  | 0  | 1  | 0  | 0  | 0  | 0  | 0  |   |
| ENSP00000320117                            | ENSG00000125733 | 131  | 7  | 8  | 8  | 3  | 3  | 2  | 8  | 6  | 4  | 0  | 2  | 1  | 0  | 2  | 1  | 2  | 7  | 8  | 5  | 6  | 6  | 3  | 3  | 6  | 9  | 2  | 3  | 5  | 5  | 6  |   |
| ENSP00000320147,ENSP000003:ENSG00000106462 | EZH2            | 37   | 2  | 0  | 1  | 1  | 0  | 1  | 2  | 0  | 0  | 1  | 3  | 3  | 1  | 2  | 3  | 2  | 0  | 2  | 0  | 2  | 2  | 2  | 1  | 2  | 0  | 1  | 0  | 1  | 1  | 2  |   |
| ENSP00000320168                            | ENSG00000070081 | 163  | 5  | 5  | 6  | 14 | 12 | 10 | 4  | 1  | 2  | 2  | 4  | 4  | 3  | 5  | 6  | 2  | 3  | 3  | 7  | 13 | 6  | 6  | 9  | 3  | 6  | 6  | 7  | 3  | 2  | 4  |   |
| ENSP00000320184                            | ENSG00000181610 | 54   | 1  | 2  | 2  | 2  | 3  | 4  | 1  | 2  | 2  | 4  | 1  | 0  | 0  | 3  | 1  | 1  | 2  | 2  | 1  | 3  | 0  | 2  | 2  | 1  | 2  | 1  | 1  | 5  | 3  | 0  |   |
| ENSP00000320291                            | ENSG00000141447 | 20   | 0  | 0  | 1  | 1  | 0  | 0  | 2  | 0  | 1  | 1  | 1  | 1  | 1  | 0  | 0  | 0  | 0  | 0  | 3  | 2  | 1  | 0  | 0  | 0  | 1  | 2  | 2  | 0  | 0  | 0  |   |
| ENSP00000320298,ENSP000003:ENSG00000175354 | PTPN2           | 44   | 3  | 1  | 1  | 0  | 1  | 1  | 3  | 0  | 1  | 2  | 2  | 2  | 3  | 0  | 1  | 1  | 1  | 0  | 1  | 2  | 2  | 5  | 4  | 2  | 1  | 0  | 1  | 0  | 2  | 2  | 1 |
| ENSP00000320309                            | ENSG00000179115 | 229  | 16 | 12 | 5  | 5  | 3  | 6  | 9  | 3  | 10 | 1  | 11 | 7  | 6  | 3  | 8  | 9  | 9  | 12 | 8  | 9  | 6  | 1  | 6  | 6  | 8  | 15 | 8  | 4  | 13 | 10 |   |
| ENSP00000320324                            | ENSG00000141279 | 166  | 13 | 9  | 11 | 15 | 14 | 12 | 6  | 9  | 0  | 8  | 5  | 13 | 3  | 6  | 23 | 18 | 19 | 20 | 12 | 14 | 4  | 11 | 5  | 14 | 17 | 10 | 12 | 16 | 15 |    |   |
| ENSP00000320345,ENSP000003:ENSG00000186101 | CXorf56         | 25   | 2  | 2  | 1  | 2  | 0  | 0  | 2  | 1  | 0  | 0  | 1  | 0  | 1  | 1  | 2  | 0  | 0  | 1  | 1  | 0  | 1  | 0  | 1  | 0  | 1  | 1  | 0  | 2  | 1  | 1  |   |
| ENSP00000320352,ENSP000003:ENSG00000109016 | DHRS7B          | 37   | 1  | 1  | 0  | 0  | 3  | 4  | 0  | 0  | 1  | 0  | 1  | 2  | 1  | 0  | 2  | 1  | 1  | 2  | 1  | 1  | 0  | 1  | 1  | 1  | 3  | 2  | 2  | 2  | 1  | 2  |   |
| ENSP00000320468                            | ENSG00000132361 | 239  | 16 | 9  | 12 | 8  | 5  | 5  | 6  | 5  | 12 | 0  | 5  | 2  | 4  | 4  | 4  | 7  | 5  | 8  | 13 | 11 | 8  | 4  | 7  | 4  | 14 | 21 | 7  | 14 | 8  | 11 |   |
| ENSP00000320485                            | ENSG00000117713 | 77   | 3  | 2  | 2  | 3  | 4  | 2  | 4  | 1  | 3  | 3  | 2  | 3  | 4  | 3  | 0  | 3  | 3  | 1  | 10 | 7  | 8  | 0  | 1  | 0  | 2  | 2  | 1  | 0  | 0  | 0  |   |
| ENSP00000320503                            | ENSG00000179151 | 60   | 5  | 3  | 1  | 1  | 1  | 4  | 0  | 1  | 2  | 0  | 1  | 1  | 1  | 2  | 0  | 4  | 4  | 3  | 4  | 0  | 0  | 0  | 1  | 3  | 3  | 3  | 3  | 3  | 1  | 2  |   |
| ENSP00000320510                            | ENSG00000108819 | 64   | 6  | 2  | 3  | 4  | 0  | 0  | 0  | 1  | 0  | 0  | 3  | 2  | 1  | 1  | 1  | 3  | 6  | 2  | 5  | 4  | 1  | 2  | 2  | 0  | 2  | 2  | 2  | 4  | 2  | 3  |   |
| ENSP00000320566                            | ENSG00000071243 | 21   | 0  | 1  | 0  | 0  | 0  | 0  | 0  | 0  | 1  | 0  | 1  | 1  | 0  | 0  | 2  | 2  | 0  | 1  | 1  | 1  | 2  | 0  | 4  | 0  | 0  | 0  | 1  | 1  | 0  | 2  |   |
| ENSP00000320658                            | ENSG00000139131 | 83   | 3  | 5  | 3  | 1  | 2  | 3  | 1  | 3  | 4  | 2  | 4  | 2  | 1  | 2  | 2  | 2  | 2  | 4  | 3  | 2  | 3  | 3  | 2  | 7  | 2  | 1  | 3  | 2  | 6  | 3  |   |
| ENSP00000320663                            | ENSG00000143924 | 330  | 18 | 14 | 13 | 13 | 17 | 12 | 16 | 18 | 13 | 4  | 10 | 7  | 10 | 7  | 10 | 12 | 10 | 4  | 11 | 13 | 6  | 8  | 10 | 5  | 17 | 17 | 9  | 7  | 11 | 8  |   |
| ENSP00000320821                            | ENSG00000129250 | 46   | 1  | 0  | 3  | 3  | 1  | 1  | 3  | 0  | 0  | 0  | 1  | 2  | 2  | 1  | 1  | 1  | 1  | 3  | 4  | 3  | 0  | 1  | 1  | 0  | 2  | 2  | 1  | 3  | 1  | 4  |   |
| ENSP00000320828                            | ENSG00000177106 | 152  | 10 | 4  | 4  | 4  | 6  | 3  | 9  | 5  | 12 | 1  | 2  | 1  | 14 | 10 | 13 | 5  | 4  | 4  | 6  | 7  | 6  | 2  | 2  | 2  | 0  | 8  | 6  | 4  | 0  | 0  |   |
| ENSP00000320866                            | ENSG00000179218 | 698  | 17 | 26 | 21 | 22 | 31 | 27 | 19 | 15 | 34 | 12 | 22 | 16 | 16 | 21 | 29 | 16 | 23 | 24 | 17 | 27 | 28 | 25 | 26 | 17 | 28 | 28 | 31 | 25 | 32 | 23 |   |
| ENSP00000320869                            | ENSG00000146063 | 12   | 0  | 0  | 0  | 0  | 1  | 0  | 1  | 0  | 0  | 0  | 0  | 0  | 1  | 0  | 0  | 1  | 1  | 0  | 2  | 0  | 2  | 1  | 1  | 0  | 0  | 0  | 0  | 0  | 0  | 1  |   |
| ENSP00000320885                            | ENSG00000021574 | 15   | 1  | 1  | 0  | 2  | 1  | 2  | 1  | 1  | 0  | 0  | 0  | 0  | 0  | 0  | 0  | 1  | 0  | 0  | 0  | 0  | 0  | 1  | 1  | 1  | 0  | 0  | 0  | 1  | 0  | 1  |   |
| ENSP00000320917                            | ENSG00000129347 | 86   | 2  | 0  | 1  | 3  | 4  | 0  | 1  | 1  | 2  | 1  | 5  | 1  | 1  | 2  | 1  | 2  | 5  | 4  | 4  | 4  | 3  | 4  | 3  | 5  | 3  | 3  | 2  | 4  | 8  | 7  |   |
| ENSP00000320924,ENSP000003:ENSG00000171475 | WIPF2           | 19   | 0  | 0  | 1  | 1  | 0  | 0  | 2  | 0  | 2  | 1  | 0  | 0  | 1  | 1  | 0  | 0  | 0  | 0  | 0  | 1  | 1  | 2  | 1  | 0  | 2  | 0  | 0  | 1  | 1  | 0  |   |
| ENSP00000320949                            | ENSG00000125107 | 311  | 16 | 10 | 11 | 9  | 10 | 12 | 9  | 10 | 12 | 1  | 8  | 2  | 10 | 7  | 10 | 10 | 15 | 12 | 13 | 16 | 11 | 5  | 13 | 6  | 11 | 11 | 14 | 10 | 17 | 10 |   |
| ENSP00000321013                            | ENSG00000105063 | 26   | 1  | 0  | 1  | 2  | 1  | 3  | 0  | 1  | 1  | 1  | 1  | 1  | 1  | 0  | 0  | 0  | 0  | 1  | 1  | 2  | 0  | 0  | 0  | 0  | 2  | 2  | 1  | 1  | 2  | 1  |   |
| ENSP00000321070                            | ENSG00000082212 | 183  | 6  | 3  | 3  | 4  | 6  | 4  | 4  | 2  | 3  | 0  | 3  | 4  | 4  | 3  | 6  | 7  | 6  | 6  | 8  | 13 | 10 | 5  | 7  | 8  | 10 | 11 | 8  | 8  | 12 | 9  |   |
| ENSP00000321179,ENSP000003:ENSG00000177483 | RBM44           | 12   | 0  | 0  | 0  | 0  | 1  | 0  | 0  | 0  | 0  | 0  | 0  | 1  | 0  | 0  | 1  | 0  | 2  | 1  | 1  | 1  | 1  | 0  | 0  | 0  | 0  | 2  | 1  | 0  | 0  | 0  |   |
| ENSP00000321195                            | ENSG00000058063 | 11   | 0  | 0  | 0  | 0  | 0  |    |    |    |    |    |    |    |    |    |    |    |    |    |    |    |    |    |    |    |    |    |    |    |    |    |   |

|                                            |                 |          |      |     |    |     |     |     |     |     |     |     |     |     |     |     |     |     |     |     |     |     |     |     |     |     |     |     |     |      |     |     |    |   |
|--------------------------------------------|-----------------|----------|------|-----|----|-----|-----|-----|-----|-----|-----|-----|-----|-----|-----|-----|-----|-----|-----|-----|-----|-----|-----|-----|-----|-----|-----|-----|-----|------|-----|-----|----|---|
| ENSP00000322926,ENSP000000:ENSG00000152767 | FARP1           | 39       | 6    | 5   | 4  | 1   | 1   | 1   | 0   | 1   | 0   | 0   | 0   | 1   | 3   | 0   | 3   | 1   | 2   | 2   | 0   | 3   | 1   | 0   | 1   | 0   | 0   | 1   | 0   | 1    | 1   | 0   |    |   |
| ENSP00000322991,ENSP000000:ENSG00000105552 | BCAT2           | 55       | 3    | 1   | 1  | 1   | 1   | 2   | 1   | 2   | 2   | 0   | 4   | 1   | 2   | 0   | 3   | 2   | 1   | 1   | 2   | 2   | 3   | 1   | 3   | 2   | 0   | 5   | 2   | 0    | 5   | 2   |    |   |
| ENSP00000323036,ENSP000000:ENSG00000014257 | ACPP            | 11       | 0    | 0   | 0  | 3   | 5   | 2   | 0   | 0   | 0   | 0   | 0   | 0   | 0   | 0   | 0   | 0   | 0   | 0   | 0   | 0   | 0   | 0   | 0   | 0   | 0   | 0   | 0   | 0    | 0   |     |    |   |
| ENSP00000323046                            | ENSG00000107371 | EXOSC3   | 75   | 3   | 3  | 0   | 1   | 2   | 2   | 1   | 2   | 2   | 0   | 7   | 2   | 1   | 0   | 3   | 2   | 4   | 2   | 3   | 2   | 3   | 1   | 3   | 3   | 3   | 6   | 0    | 4   | 7   | 3  |   |
| ENSP00000323047                            | ENSG00000148824 | MTG1     | 36   | 1   | 1  | 2   | 3   | 1   | 1   | 2   | 3   | 1   | 0   | 1   | 3   | 0   | 0   | 0   | 3   | 1   | 1   | 1   | 1   | 1   | 2   | 1   | 2   | 2   | 1   | 0    | 1   | 0   | 1  |   |
| ENSP00000323065                            | ENSG00000179271 | GADD45G  | 149  | 3   | 5  | 5   | 2   | 5   | 7   | 3   | 4   | 2   | 5   | 3   | 5   | 6   | 2   | 9   | 7   | 6   | 8   | 3   | 9   | 3   | 6   | 6   | 5   | 9   | 6   | 4    | 4   | 3   |    |   |
| ENSP00000323071                            | ENSG00000177465 | ACOT4    | 19   | 0   | 0  | 0   | 1   | 2   | 1   | 2   | 1   | 0   | 1   | 0   | 1   | 2   | 0   | 1   | 1   | 0   | 2   | 0   | 1   | 0   | 1   | 1   | 1   | 0   | 0   | 0    | 0   | 0   |    |   |
| ENSP00000323074,ENSP000000:ENSG00000108557 | RAI1            | 26       | 1    | 2   | 1  | 0   | 0   | 1   | 1   | 1   | 1   | 1   | 2   | 0   | 0   | 0   | 1   | 0   | 2   | 0   | 3   | 1   | 0   | 0   | 1   | 2   | 2   | 1   | 0   | 2    | 0   | 0   |    |   |
| ENSP00000323076                            | ENSG00000178057 | NDUFAF3  | 57   | 2   | 1  | 0   | 0   | 1   | 2   | 1   | 2   | 1   | 2   | 1   | 4   | 2   | 2   | 1   | 1   | 1   | 2   | 2   | 1   | 3   | 2   | 2   | 3   | 2   | 2   | 2    | 4   | 4   | 2  |   |
| ENSP00000323099,ENSP000000:ENSG00000164053 | ATRP1           | 13       | 1    | 0   | 0  | 0   | 0   | 0   | 1   | 0   | 0   | 0   | 1   | 3   | 1   | 1   | 0   | 1   | 0   | 0   | 0   | 0   | 0   | 0   | 0   | 0   | 0   | 1   | 1   | 0    | 0   | 0   | 2  |   |
| ENSP00000323194,ENSP000000:ENSG00000076356 | PLXNA2          | 14       | 2    | 0   | 0  | 2   | 0   | 0   | 2   | 0   | 1   | 0   | 1   | 0   | 1   | 0   | 0   | 0   | 0   | 0   | 0   | 1   | 1   | 0   | 1   | 1   | 1   | 0   | 0   | 1    | 0   | 0   | 0  |   |
| ENSP00000323264                            | ENSG00000152939 | MARVELD  | 10   | 0   | 0  | 0   | 1   | 0   | 1   | 1   | 1   | 1   | 0   | 0   | 0   | 0   | 0   | 0   | 0   | 1   | 0   | 0   | 0   | 0   | 1   | 1   | 0   | 2   | 0   | 0    | 0   | 0   | 0  |   |
| ENSP00000323288                            | ENSG00000166133 | RPUSD2   | 30   | 1   | 0  | 0   | 0   | 0   | 1   | 1   | 0   | 0   | 1   | 0   | 0   | 2   | 1   | 1   | 1   | 1   | 0   | 2   | 0   | 0   | 0   | 2   | 3   | 3   | 2   | 1    | 2   | 3   | 1  |   |
| ENSP00000323300                            | ENSG00000076382 | SPAG5    | 26   | 1   | 1  | 3   | 0   | 0   | 1   | 1   | 0   | 1   | 1   | 0   | 0   | 2   | 0   | 1   | 0   | 0   | 3   | 2   | 2   | 2   | 1   | 0   | 0   | 1   | 0   | 0    | 0   | 1   | 2  |   |
| ENSP00000323313                            | ENSG00000065485 | PDIA5    | 68   | 9   | 4  | 4   | 3   | 4   | 3   | 4   | 2   | 2   | 1   | 3   | 1   | 1   | 0   | 0   | 1   | 5   | 2   | 2   | 2   | 1   | 0   | 2   | 3   | 2   | 2   | 3    | 0   | 1   | 1  |   |
| ENSP00000323377,ENSP000000:ENSG00000180104 | EXOC3           | 50       | 2    | 1   | 0  | 4   | 1   | 4   | 2   | 3   | 2   | 0   | 2   | 1   | 3   | 0   | 0   | 2   | 0   | 2   | 2   | 3   | 2   | 1   | 2   | 1   | 1   | 1   | 2   | 1    | 3   | 2   |    |   |
| ENSP00000323421                            | ENSG00000072501 | SMC1A    | 526  | 13  | 18 | 11  | 16  | 17  | 15  | 20  | 13  | 24  | 17  | 43  | 14  | 14  | 9   | 20  | 12  | 14  | 12  | 23  | 21  | 20  | 15  | 24  | 17  | 16  | 20  | 9    | 21  | 22  | 16 |   |
| ENSP00000323439,ENSP000000:ENSG00000163029 | SMC6            | 33       | 0    | 0   | 0  | 1   | 1   | 0   | 3   | 0   | 1   | 2   | 4   | 0   | 0   | 4   | 0   | 2   | 1   | 0   | 2   | 3   | 1   | 1   | 3   | 1   | 1   | 0   | 0   | 1    | 0   | 1   | 1  |   |
| ENSP00000323511                            | ENSG00000039650 | PNKP     | 102  | 2   | 3  | 5   | 2   | 3   | 5   | 4   | 5   | 4   | 2   | 3   | 3   | 1   | 2   | 3   | 3   | 3   | 4   | 6   | 4   | 2   | 3   | 2   | 4   | 5   | 4   | 5    | 3   | 4   | 0  |   |
| ENSP00000323527                            | ENSG00000128585 | MKLN1    | 13   | 1   | 0  | 1   | 0   | 0   | 0   | 0   | 1   | 0   | 0   | 1   | 0   | 1   | 0   | 1   | 1   | 0   | 1   | 2   | 1   | 0   | 0   | 0   | 1   | 0   | 0   | 0    | 0   | 2   | 0  | 0 |
| ENSP00000323580,ENSP000000:ENSG00000032742 | IFT88           | 13       | 1    | 0   | 0  | 3   | 0   | 2   | 1   | 1   | 0   | 0   | 0   | 1   | 0   | 0   | 0   | 0   | 0   | 0   | 1   | 0   | 0   | 1   | 0   | 0   | 1   | 0   | 0   | 0    | 0   | 1   | 0  |   |
| ENSP00000323593,ENSP000000:ENSG00000127328 | RAB31P          | 34       | 0    | 1   | 1  | 3   | 4   | 0   | 1   | 1   | 0   | 0   | 0   | 2   | 1   | 1   | 1   | 0   | 0   | 0   | 2   | 3   | 1   | 2   | 0   | 2   | 3   | 0   | 1   | 3    | 0   | 1   | 0  |   |
| ENSP00000323680,ENSP000000:ENSG00000100897 | DCAF11          | 11       | 0    | 0   | 0  | 1   | 0   | 1   | 0   | 0   | 1   | 0   | 0   | 0   | 2   | 0   | 1   | 0   | 0   | 0   | 0   | 1   | 0   | 0   | 0   | 0   | 0   | 0   | 0   | 2    | 1   | 1   | 1  |   |
| ENSP00000323687                            | ENSG00000175931 | UBE2O    | 53   | 5   | 1  | 3   | 3   | 0   | 1   | 3   | 0   | 0   | 0   | 1   | 1   | 2   | 0   | 0   | 3   | 4   | 2   | 4   | 4   | 1   | 2   | 1   | 1   | 2   | 3   | 3    | 1   | 1   | 1  |   |
| ENSP00000323696                            | ENSG00000170275 | CRTPA    | 19   | 2   | 2  | 1   | 1   | 0   | 0   | 0   | 0   | 0   | 0   | 1   | 1   | 0   | 0   | 0   | 1   | 0   | 0   | 0   | 0   | 0   | 1   | 0   | 0   | 0   | 1   | 1    | 3   | 1   | 3  |   |
| ENSP00000323720                            | ENSG00000180182 | MED14    | 34   | 1   | 1  | 0   | 2   | 0   | 1   | 3   | 1   | 0   | 1   | 1   | 2   | 3   | 0   | 2   | 1   | 0   | 2   | 1   | 2   | 1   | 1   | 3   | 3   | 0   | 0   | 1    | 1   | 0   | 0  |   |
| ENSP00000323782                            | ENSG00000180329 | CCDC43   | 51   | 4   | 2  | 2   | 1   | 1   | 0   | 3   | 2   | 2   | 1   | 0   | 0   | 2   | 2   | 3   | 2   | 0   | 2   | 4   | 3   | 2   | 1   | 0   | 0   | 2   | 2   | 2    | 2   | 2   | 2  |   |
| ENSP00000323795,ENSP000000:ENSG00000184909 | RP5-990P        | 15       | 0    | 1   | 0  | 1   | 0   | 0   | 1   | 0   | 0   | 1   | 0   | 0   | 0   | 1   | 1   | 2   | 1   | 0   | 0   | 0   | 2   | 0   | 1   | 1   | 0   | 0   | 0   | 1    | 1   | 0   | 1  |   |
| ENSP00000323811                            | ENSG00000131373 | HACL1    | 28   | 2   | 2  | 3   | 1   | 0   | 0   | 1   | 2   | 1   | 2   | 0   | 2   | 0   | 0   | 1   | 0   | 0   | 1   | 1   | 1   | 1   | 1   | 3   | 0   | 0   | 0   | 1    | 1   | 0   | 1  | 0 |
| ENSP00000323837                            | ENSG00000163798 | SLC4A1AF | 60   | 4   | 4  | 5   | 3   | 2   | 2   | 2   | 0   | 0   | 2   | 2   | 2   | 0   | 4   | 1   | 2   | 2   | 2   | 3   | 2   | 1   | 0   | 1   | 1   | 2   | 0   | 0    | 3   | 5   | 3  |   |
| ENSP00000323856                            | ENSG00000178209 | PLEC     | 5716 | 159 | 84 | 115 | 125 | 176 | 139 | 223 | 226 | 209 | 323 | 430 | 290 | 179 | 204 | 231 | 164 | 285 | 235 | 174 | 214 | 178 | 218 | 257 | 151 | 162 | 213 | 120  | 81  | 82  | 69 |   |
| ENSP00000323867,ENSP000000:ENSG00000181929 | PRKAG1          | 61       | 1    | 2   | 2  | 3   | 3   | 4   | 3   | 1   | 5   | 0   | 0   | 0   | 2   | 3   | 2   | 3   | 2   | 4   | 4   | 1   | 2   | 0   | 1   | 1   | 3   | 4   | 3   | 3    | 2   | 1   | 2  |   |
| ENSP00000323889                            | ENSG00000121060 | TRIM25   | 299  | 13  | 7  | 7   | 8   | 11  | 13  | 10  | 9   | 8   | 4   | 14  | 7   | 10  | 6   | 7   | 16  | 14  | 12  | 6   | 10  | 8   | 5   | 9   | 8   | 20  | 13  | 8    | 9   | 17  | 10 |   |
| ENSP00000323967,ENSP000000:ENSG00000073584 | SMARCE1         | 102      | 4    | 3   | 3  | 2   | 1   | 1   | 2   | 2   | 3   | 4   | 4   | 2   | 5   | 4   | 2   | 5   | 4   | 2   | 3   | 7   | 5   | 7   | 4   | 3   | 3   | 6   | 4   | 1    | 5   | 1   | 1  |   |
| ENSP00000324020,ENSP000000:ENSG00000163808 | KIF15           | 35       | 3    | 1   | 3  | 3   | 1   | 1   | 1   | 0   | 2   | 0   | 2   | 1   | 1   | 1   | 0   | 1   | 0   | 1   | 0   | 1   | 2   | 0   | 0   | 1   | 0   | 0   | 1   | 3    | 1   | 2   | 0  | 3 |
| ENSP00000324074                            | ENSG00000143401 | ANP32E   | 125  | 5   | 3  | 2   | 1   | 3   | 4   | 2   | 2   | 6   | 1   | 8   | 1   | 2   | 3   | 4   | 6   | 4   | 9   | 2   | 4   | 7   | 2   | 5   | 5   | 2   | 6   | 7    | 4   | 10  | 5  |   |
| ENSP00000324100,ENSP000000:ENSG00000159111 | MRPL10          | 45       | 2    | 2   | 1  | 1   | 1   | 1   | 1   | 2   | 1   | 2   | 0   | 3   | 3   | 0   | 0   | 0   | 2   | 1   | 1   | 0   | 1   | 3   | 0   | 1   | 3   | 2   | 5   | 2    | 0   | 2   | 3  |   |
| ENSP00000324122                            | ENSG00000105618 | PRPF31   | 136  | 5   | 6  | 6   | 9   | 2   | 6   | 5   | 2   | 3   | 3   | 6   | 5   | 3   | 4   | 7   | 2   | 4   | 5   | 9   | 4   | 1   | 2   | 4   | 5   | 3   | 2   | 3    | 9   | 7   | 4  |   |
| ENSP00000324135,ENSP000000:ENSG00000125633 | CCDC93          | 24       | 1    | 2   | 0  | 1   | 0   | 1   | 0   | 0   | 0   | 1   | 0   | 0   | 1   | 0   | 1   | 0   | 0   | 2   | 2   | 0   | 2   | 0   | 0   | 0   | 1   | 2   | 1   | 2    | 1   | 2   | 1  |   |
| ENSP00000324173                            | ENSG00000044574 | HSPA5    | 3084 | 78  | 59 | 75  | 182 | 289 | 178 | 97  | 70  | 65  | 61  | 91  | 43  | 81  | 92  | 84  | 140 | 199 | 98  | 96  | 123 | 82  | 84  | 91  | 80  | 84  | 89  | 73   | 102 | 130 | 68 |   |
| ENSP00000324205                            | ENSG00000100931 | CHMP4A   | 50   | 2   | 1  | 1   | 2   | 4   | 3   | 2   | 2   | 1   | 0   | 1   | 0   | 2   | 1   | 1   | 1   | 1   | 1   | 5   | 1   | 2   | 1   | 1   | 1   | 5   | 1   | 2    | 3   | 1   | 1  |   |
| ENSP00000324287                            | ENSG00000114331 | ACAP2    | 59   | 0   | 1  | 1   | 6   | 2   | 6   | 3   | 2   | 0   | 0   | 0   | 1   | 0   | 0   | 2   | 2   | 5   | 3   | 2   | 1   | 3   | 0   | 1   | 1   | 1   | 2   | 2    | 3   | 3   | 6  |   |
| ENSP00000324294                            | ENSG00000152242 | C18orf25 | 23   | 0   | 0  | 0   | 1   | 0   | 1   | 2   | 0   | 1   | 0   | 0   | 0   | 0   | 1   | 1   | 1   | 2   | 1   | 3   | 0   | 0   | 0   | 1   | 1   | 0   | 1   | 0    | 1   | 1   | 1  |   |
| ENSP00000324392                            | ENSG00000180843 |          | 30   | 0   | 1  | 0   | 2   | 0   | 2   | 3   | 4   | 1   | 0   | 0   | 0   | 0   | 2   | 1   | 0   | 0   | 0   | 1   | 4   | 1   | 1   | 1   | 1   | 2   | 1   | 1    | 0   | 1   | 0  |   |
| ENSP00000324438,ENSP000000:ENSG00000171858 | RPS21           | 330      | 16   | 6   | 13 | 8   | 15  | 10  | 6   | 2   | 9   | 15  | 4   | 9   | 21  | 6   | 12  | 21  | 13  | 6   | 18  | 9   | 9   | 14  | 5   | 14  | 12  | 8   | 10  | 18   | 12  |     |    |   |
| ENSP00000324444,ENSP000000:ENSG00000151332 | MBIP            | 24       | 2    | 2   | 0  | 3   | 0   | 2   | 0   | 0   | 1   | 0   | 0   | 1   | 2   | 0   | 0   | 1   | 0   | 1   | 3   | 2   | 1   | 0   | 0   | 1   | 0   | 1   | 0   | 1    | 0   | 0   | 0  |   |
| ENSP00000324463                            | ENSG00000119596 | YLPM1    | 73   | 5   | 1  | 0   | 3   | 0   | 2   | 3   | 0   | 2   | 6   | 5   | 6   | 3   | 0   | 2   | 1   | 1   | 2   | 6   | 1   | 1   | 2   | 6   | 6   | 1   | 2   | 1    | 3   | 1   | 1  |   |
| ENSP00000324527                            | ENSG00000176658 | MYO1D    | 413  | 27  | 19 | 18  | 9   | 7   | 6   | 21  | 11  | 13  | 9   | 31  | 26  | 14  | 4   | 11  | 9   | 9   | 10  | 19  | 11  | 13  | 13  | 17  | 12  | 24  | 30  | 20   | 0   | 0   | 0  |   |
| ENSP00000324532                            | ENSG00000053747 | LAMA3    | 17   | 2   | 0  | 0   | 2   | 1   | 1   | 0   | 1   | 0   | 0   | 1   | 1   | 0   | 0   | 0   | 1   | 0   | 2   | 0   | 0   | 0   | 1   | 2   | 2   | 0   | 0   | 0    | 0   | 0   | 0  |   |
| ENSP00000324549                            | ENSG00000068799 | CYFIP1   | 278  | 16  | 14 | 6   | 6   | 9   | 10  | 8   | 5   | 12  | 2   | 10  | 3   | 6   | 6   | 7   | 9   | 11  | 9   | 14  | 10  | 10  | 6   | 11  | 9   | 13  | 15  | 11   | 11  | 9   | 10 |   |
| ENSP00000324573                            | ENSG00000177731 | FLII     | 197  | 5   | 4  | 3   | 4   | 6   | 8   | 8   | 6   | 9   | 1   | 4   | 3   | 7   | 5   | 7   | 6   | 7   | 8   | 7   | 7   | 9   | 3   | 7   | 5   | 5   | 14  | 11</ |     |     |    |   |

|                                 |                 |           |      |    |    |    |    |     |    |    |    |    |    |    |    |    |    |    |    |    |    |    |    |    |    |    |    |    |    |    |    |    |    |
|---------------------------------|-----------------|-----------|------|----|----|----|----|-----|----|----|----|----|----|----|----|----|----|----|----|----|----|----|----|----|----|----|----|----|----|----|----|----|----|
| ENSP00000326550                 | ENSG00000013810 | TACC3     | 58   | 5  | 4  | 5  | 3  | 1   | 4  | 0  | 1  | 1  | 0  | 0  | 1  | 2  | 3  | 1  | 1  | 2  | 1  | 3  | 4  | 1  | 0  | 2  | 1  | 0  | 2  | 2  | 4  | 1  | 3  |
| ENSP00000326563                 | ENSG00000120733 | KDM3B     | 168  | 11 | 5  | 5  | 5  | 5   | 5  | 9  | 6  | 2  | 1  | 7  | 4  | 4  | 2  | 7  | 4  | 6  | 6  | 7  | 8  | 9  | 3  | 10 | 2  | 9  | 8  | 3  | 5  | 5  | 5  |
| ENSP00000326579,ENSP00000326580 | ENSG00000004961 | HCCS      | 142  | 7  | 5  | 1  | 5  | 3   | 6  | 5  | 2  | 0  | 3  | 13 | 9  | 3  | 2  | 4  | 9  | 4  | 6  | 4  | 3  | 5  | 2  | 8  | 5  | 1  | 5  | 4  | 4  | 8  | 6  |
| ENSP00000326603                 | ENSG00000180715 |           | 72   | 5  | 2  | 3  | 3  | 0   | 1  | 4  | 1  | 3  | 1  | 1  | 3  | 5  | 1  | 2  | 2  | 4  | 2  | 4  | 2  | 3  | 2  | 4  | 3  | 2  | 3  | 1  | 2  | 0  | 3  |
| ENSP00000326753                 | ENSG00000143337 | TOR1AIP1  | 70   | 2  | 1  | 2  | 2  | 1   | 1  | 3  | 2  | 2  | 3  | 4  | 2  | 1  | 2  | 1  | 3  | 4  | 3  | 4  | 3  | 1  | 3  | 4  | 3  | 1  | 1  | 1  | 3  | 5  | 2  |
| ENSP00000326806                 | ENSG00000114503 | NCPB2     | 82   | 6  | 2  | 2  | 3  | 7   | 2  | 5  | 1  | 1  | 2  | 4  | 2  | 2  | 2  | 2  | 3  | 2  | 2  | 3  | 2  | 3  | 2  | 2  | 4  | 2  | 4  | 3  | 1  | 4  | 3  |
| ENSP00000326817,ENSP00000326818 | ENSG00000180979 | LRRC57    | 35   | 0  | 2  | 0  | 2  | 2   | 2  | 1  | 1  | 1  | 0  | 0  | 0  | 1  | 2  | 1  | 1  | 2  | 1  | 1  | 3  | 1  | 2  | 2  | 1  | 1  | 2  | 1  | 1  | 0  | 1  |
| ENSP00000326841,ENSP00000326842 | ENSG00000123352 | SPATS2    | 53   | 6  | 1  | 6  | 2  | 1   | 0  | 0  | 1  | 2  | 0  | 0  | 0  | 0  | 2  | 2  | 3  | 4  | 1  | 1  | 2  | 2  | 2  | 4  | 2  | 3  | 1  | 0  | 3  | 1  | 1  |
| ENSP00000326858                 | ENSG00000178425 | NTSDC1    | 52   | 3  | 3  | 2  | 1  | 2   | 1  | 2  | 0  | 2  | 0  | 0  | 0  | 0  | 0  | 0  | 4  | 3  | 4  | 3  | 2  | 3  | 2  | 2  | 2  | 1  | 2  | 2  | 2  | 1  | 3  |
| ENSP00000326981,ENSP00000326982 | ENSG00000177971 | IMP3      | 88   | 3  | 4  | 0  | 3  | 4   | 2  | 2  | 2  | 2  | 2  | 2  | 3  | 2  | 2  | 4  | 2  | 4  | 3  | 1  | 3  | 4  | 5  | 3  | 2  | 5  | 2  | 1  | 7  | 5  | 4  |
| ENSP00000327054                 | ENSG00000176619 | LMNB2     | 850  | 24 | 18 | 21 | 18 | 15  | 16 | 21 | 29 | 17 | 30 | 40 | 36 | 28 | 28 | 34 | 21 | 26 | 36 | 34 | 34 | 33 | 38 | 41 | 28 | 30 | 33 | 25 | 30 | 39 | 27 |
| ENSP00000327070                 | ENSG00000146701 | MDH2      | 1328 | 45 | 31 | 32 | 28 | 70  | 47 | 47 | 57 | 37 | 45 | 56 | 42 | 38 | 30 | 33 | 43 | 51 | 43 | 35 | 52 | 37 | 53 | 55 | 37 | 61 | 50 | 42 | 45 | 48 | 38 |
| ENSP00000327077,ENSP00000327078 | ENSG00000078674 | PCM1      | 195  | 9  | 4  | 3  | 7  | 5   | 4  | 2  | 1  | 2  | 6  | 5  | 8  | 6  | 8  | 10 | 3  | 5  | 5  | 16 | 11 | 15 | 1  | 11 | 2  | 9  | 7  | 4  | 8  | 9  | 9  |
| ENSP00000327116                 | ENSG00000013016 | EH03      | 124  | 5  | 6  | 3  | 6  | 8   | 4  | 5  | 1  | 4  | 0  | 4  | 4  | 3  | 1  | 3  | 6  | 5  | 4  | 4  | 5  | 4  | 2  | 7  | 4  | 6  | 5  | 4  | 4  | 4  | 3  |
| ENSP00000327137,ENSP00000327138 | ENSG00000163466 | ARPC2     | 98   | 6  | 5  | 1  | 1  | 2   | 6  | 1  | 4  | 2  | 0  | 6  | 3  | 5  | 0  | 5  | 3  | 1  | 5  | 3  | 5  | 3  | 1  | 4  | 1  | 2  | 13 | 4  | 2  | 2  | 2  |
| ENSP00000327154,ENSP00000327155 | ENSG00000137216 | TMEM63B   | 10   | 1  | 0  | 1  | 0  | 0   | 0  | 0  | 0  | 0  | 1  | 0  | 0  | 0  | 0  | 1  | 0  | 0  | 1  | 1  | 0  | 0  | 1  | 0  | 1  | 0  | 1  | 1  | 1  | 0  | 0  |
| ENSP00000327179                 | ENSG00000141076 | CIRH1A    | 82   | 5  | 2  | 1  | 1  | 1   | 2  | 2  | 1  | 2  | 1  | 5  | 2  | 3  | 1  | 1  | 5  | 3  | 3  | 2  | 3  | 2  | 1  | 4  | 2  | 5  | 4  | 3  | 3  | 6  | 6  |
| ENSP00000327191                 | ENSG00000132141 | CCT6B     | 107  | 5  | 2  | 2  | 3  | 1   | 2  | 4  | 1  | 2  | 0  | 3  | 2  | 5  | 2  | 5  | 6  | 7  | 6  | 5  | 3  | 7  | 2  | 2  | 2  | 4  | 6  | 4  | 4  | 6  | 4  |
| ENSP00000327255,ENSP00000327256 | ENSG00000100614 | PPM1A     | 62   | 1  | 0  | 1  | 4  | 2   | 3  | 2  | 1  | 1  | 0  | 0  | 3  | 2  | 3  | 2  | 3  | 2  | 1  | 3  | 2  | 3  | 0  | 1  | 1  | 3  | 5  | 3  | 3  | 5  | 2  |
| ENSP00000327268,ENSP00000327269 | ENSG00000178127 | NDUFV2    | 108  | 4  | 2  | 2  | 3  | 2   | 4  | 1  | 4  | 3  | 2  | 7  | 4  | 3  | 2  | 3  | 3  | 7  | 3  | 2  | 2  | 2  | 1  | 7  | 3  | 4  | 6  | 5  | 4  | 11 | 1  |
| ENSP00000327309,ENSP00000327310 | ENSG00000149182 | ARFGAP2   | 59   | 5  | 1  | 7  | 6  | 2   | 4  | 1  | 3  | 1  | 1  | 0  | 0  | 1  | 5  | 1  | 1  | 1  | 1  | 1  | 5  | 0  | 1  | 1  | 0  | 3  | 3  | 1  | 1  | 1  | 1  |
| ENSP00000327336,ENSP00000327337 | ENSG00000182492 | BGN       | 10   | 1  | 0  | 0  | 0  | 0   | 1  | 2  | 1  | 3  | 0  | 1  | 0  | 0  | 0  | 0  | 0  | 0  | 0  | 0  | 0  | 0  | 0  | 0  | 0  | 0  | 0  | 0  | 0  | 1  | 0  |
| ENSP00000327436                 | ENSG00000183576 | SETD3     | 163  | 13 | 6  | 7  | 11 | 11  | 7  | 7  | 7  | 3  | 3  | 1  | 1  | 3  | 2  | 4  | 5  | 6  | 4  | 4  | 9  | 3  | 1  | 5  | 1  | 9  | 12 | 7  | 5  | 1  | 5  |
| ENSP00000327487                 | ENSG00000182173 | TSEN54    | 11   | 0  | 0  | 0  | 0  | 0   | 0  | 0  | 0  | 0  | 0  | 0  | 0  | 0  | 0  | 0  | 3  | 0  | 0  | 0  | 0  | 2  | 0  | 0  | 1  | 1  | 1  | 0  | 1  | 0  |    |
| ENSP00000327522                 | ENSG00000184672 | RALYL     | 36   | 3  | 1  | 1  | 0  | 0   | 3  | 1  | 1  | 1  | 1  | 2  | 1  | 0  | 1  | 1  | 1  | 0  | 1  | 2  | 2  | 2  | 1  | 1  | 1  | 1  | 1  | 2  | 2  | 0  | 1  |
| ENSP00000327650                 | ENSG00000184056 | VPS33B    | 14   | 2  | 1  | 0  | 2  | 2   | 1  | 0  | 0  | 0  | 0  | 0  | 0  | 0  | 1  | 0  | 1  | 0  | 0  | 0  | 0  | 0  | 0  | 0  | 0  | 1  | 1  | 1  | 0  | 1  | 0  |
| ENSP00000327669                 | ENSG00000184730 | AC13B894  | 20   | 0  | 0  | 0  | 0  | 0   | 0  | 0  | 0  | 0  | 0  | 0  | 1  | 0  | 0  | 1  | 0  | 0  | 0  | 0  | 0  | 0  | 0  | 0  | 0  | 3  | 14 | 1  | 0  | 0  |    |
| ENSP00000327691,ENSP00000327692 | ENSG00000182952 | HMGNA4    | 10   | 0  | 0  | 1  | 0  | 0   | 0  | 0  | 0  | 0  | 2  | 0  | 0  | 0  | 1  | 1  | 0  | 0  | 1  | 0  | 0  | 0  | 3  | 0  | 0  | 0  | 0  | 0  | 1  | 0  | 0  |
| ENSP00000327694                 | ENSG00000183020 | AP2A2     | 240  | 6  | 9  | 5  | 10 | 5   | 14 | 9  | 2  | 9  | 1  | 8  | 5  | 7  | 8  | 11 | 4  | 6  | 9  | 9  | 9  | 10 | 10 | 11 | 7  | 12 | 9  | 11 | 7  | 10 | 7  |
| ENSP00000327801                 | ENSG00000185624 | P4HB      | 1552 | 60 | 44 | 70 | 61 | 134 | 63 | 62 | 47 | 43 | 38 | 36 | 25 | 38 | 66 | 33 | 52 | 82 | 40 | 45 | 86 | 41 | 49 | 63 | 30 | 63 | 61 | 42 | 32 | 31 | 15 |
| ENSP00000327821                 | ENSG00000184575 | XPOT      | 108  | 6  | 6  | 1  | 7  | 3   | 7  | 4  | 2  | 5  | 0  | 4  | 1  | 3  | 0  | 3  | 7  | 5  | 6  | 4  | 3  | 5  | 0  | 0  | 1  | 2  | 0  | 5  | 4  | 9  | 5  |
| ENSP00000327889                 | ENSG00000185085 | INTS5     | 33   | 1  | 1  | 0  | 2  | 1   | 2  | 3  | 0  | 0  | 1  | 1  | 1  | 0  | 1  | 1  | 1  | 1  | 2  | 0  | 1  | 1  | 1  | 2  | 1  | 2  | 2  | 0  | 1  | 1  | 2  |
| ENSP00000328023                 | ENSG00000182934 | SRPR      | 145  | 5  | 6  | 3  | 2  | 2   | 6  | 3  | 5  | 7  | 2  | 9  | 4  | 3  | 2  | 7  | 4  | 2  | 7  | 5  | 8  | 7  | 2  | 5  | 6  | 5  | 10 | 6  | 3  | 4  | 5  |
| ENSP00000328062                 | ENSG00000136051 | KIAA1033  | 78   | 3  | 2  | 3  | 4  | 5   | 3  | 5  | 4  | 3  | 0  | 0  | 1  | 1  | 2  | 3  | 1  | 2  | 2  | 3  | 2  | 3  | 1  | 2  | 1  | 4  | 6  | 3  | 3  | 2  | 3  |
| ENSP00000328088                 | ENSG00000177425 | PAWR      | 90   | 6  | 4  | 7  | 3  | 2   | 1  | 3  | 2  | 3  | 0  | 3  | 1  | 3  | 1  | 4  | 1  | 4  | 3  | 3  | 3  | 4  | 0  | 5  | 3  | 4  | 5  | 0  | 2  | 6  | 4  |
| ENSP00000328178                 | ENSG00000184203 | PPP1R2    | 15   | 4  | 1  | 1  | 2  | 0   | 1  | 0  | 0  | 0  | 1  | 1  | 2  | 0  | 0  | 0  | 1  | 0  | 0  | 0  | 0  | 0  | 1  | 0  | 0  | 0  | 0  | 0  | 0  | 0  | 0  |
| ENSP00000328228,ENSP00000328229 | ENSG00000184661 | CDC42     | 23   | 1  | 2  | 1  | 0  | 0   | 0  | 0  | 0  | 0  | 0  | 1  | 1  | 2  | 1  | 1  | 1  | 0  | 1  | 1  | 0  | 0  | 0  | 1  | 0  | 1  | 0  | 1  | 5  | 1  | 1  |
| ENSP00000328236                 | ENSG00000184445 | KNTC1     | 37   | 1  | 1  | 1  | 5  | 4   | 1  | 6  | 0  | 2  | 0  | 1  | 0  | 3  | 0  | 0  | 0  | 0  | 1  | 2  | 0  | 1  | 0  | 0  | 1  | 1  | 1  | 1  | 1  | 0  | 3  |
| ENSP00000328287,ENSP00000328288 | ENSG00000164068 | RNF123    | 18   | 2  | 1  | 1  | 1  | 0   | 1  | 0  | 0  | 0  | 0  | 1  | 1  | 0  | 0  | 0  | 1  | 1  | 0  | 3  | 1  | 0  | 0  | 0  | 1  | 1  | 0  | 1  | 0  | 1  | 0  |
| ENSP00000328358                 | ENSG00000185640 | KRT79     | 246  | 3  | 1  | 2  | 15 | 4   | 9  | 6  | 16 | 12 | 7  | 48 | 24 | 6  | 4  | 7  | 12 | 14 | 8  | 14 | 4  | 3  | 4  | 6  | 8  | 0  | 4  | 2  | 1  | 0  | 2  |
| ENSP00000328405,ENSP00000328406 | ENSG00000065357 | DGKA      | 15   | 0  | 0  | 0  | 0  | 0   | 0  | 0  | 0  | 0  | 0  | 0  | 0  | 0  | 0  | 0  | 2  | 1  | 0  | 0  | 0  | 0  | 2  | 0  | 0  | 1  | 0  | 2  | 4  | 1  |    |
| ENSP00000328547,ENSP00000328548 | ENSG00000088305 | DNMT3B    | 12   | 8  | 2  | 1  | 0  | 0   | 0  | 0  | 0  | 0  | 0  | 0  | 0  | 0  | 0  | 0  | 0  | 0  | 0  | 0  | 0  | 1  | 0  | 0  | 0  | 0  | 0  | 0  | 0  | 0  | 0  |
| ENSP00000328570                 | ENSG00000182512 | GLRX5     | 85   | 4  | 2  | 3  | 1  | 3   | 2  | 2  | 1  | 2  | 2  | 6  | 5  | 3  | 1  | 3  | 3  | 2  | 2  | 1  | 4  | 2  | 1  | 3  | 4  | 4  | 5  | 3  | 3  | 4  | 4  |
| ENSP00000328671,ENSP00000328672 | ENSG00000160193 | WDR4      | 10   | 2  | 0  | 0  | 0  | 0   | 0  | 0  | 0  | 0  | 0  | 0  | 0  | 0  | 0  | 0  | 1  | 0  | 0  | 0  | 0  | 0  | 0  | 2  | 2  | 0  | 0  | 1  | 0  | 2  | 0  |
| ENSP00000328690                 | ENSG00000089737 | DDX24     | 187  | 12 | 5  | 7  | 5  | 5   | 1  | 3  | 2  | 3  | 7  | 16 | 9  | 4  | 13 | 8  | 6  | 8  | 5  | 8  | 5  | 6  | 6  | 7  | 3  | 4  | 5  | 5  | 8  | 3  |    |
| ENSP00000328720                 | ENSG00000164916 | FOXK1     | 30   | 3  | 0  | 2  | 0  | 0   | 0  | 3  | 0  | 0  | 1  | 2  | 0  | 0  | 1  | 1  | 1  | 1  | 2  | 1  | 2  | 2  | 2  | 1  | 2  | 0  | 0  | 0  | 2  | 1  | 0  |
| ENSP00000328729                 | ENSG00000183291 | RP4-604K1 | 87   | 4  | 3  | 0  | 3  | 2   | 2  | 2  | 2  | 4  | 1  | 6  | 2  | 2  | 0  | 4  | 1  | 3  | 3  | 3  | 6  | 4  | 1  | 7  | 4  | 3  | 5  | 4  | 1  | 3  | 2  |
| ENSP00000328773                 | ENSG00000186834 | HEXIM1    | 98   | 5  | 3  | 6  | 0  | 0   | 0  | 1  | 1  | 1  | 5  | 5  | 1  | 1  | 6  | 3  | 1  | 8  | 4  | 3  | 9  | 5  | 5  | 6  | 2  | 2  | 5  | 1  | 3  | 2  | 4  |
| ENSP00000328835                 | ENSG00000184428 | TOP1MT    | 17   | 0  | 1  | 1  | 0  | 0   | 0  | 0  | 1  | 0  | 1  | 3  | 1  | 0  | 1  | 1  | 1  | 1  | 0  | 0  | 0  | 0  | 1  | 0  | 0  | 0  | 0  | 0  | 2  | 1  | 0  |
| ENSP00000328854                 | ENSG00000184967 | NOC4L     | 39   | 1  | 0  | 1  | 2  | 1   | 0  | 2  | 0  | 2  | 0  | 1  | 2  | 1  | 0  | 3  | 2  | 2  | 1  | 1  | 1  | 2  | 1  | 2  | 3  | 0  | 1  | 1  | 3  | 2  | 1  |
| ENSP00000328923,ENSP00000328924 | ENSG00000186994 | KANK3     | 12   | 0  | 0  | 0  | 0  | 0   | 0  | 0  | 0  | 0  | 0  | 2  | 0  | 1  | 0  | 1  | 0  | 1  | 1  | 0  | 1  |    |    |    |    |    |    |    |    |    |    |

|                            |                 |          |      |     |     |     |    |     |    |     |    |    |    |     |    |    |    |    |     |     |     |    |     |     |    |     |     |     |     |     |    |     |    |   |
|----------------------------|-----------------|----------|------|-----|-----|-----|----|-----|----|-----|----|----|----|-----|----|----|----|----|-----|-----|-----|----|-----|-----|----|-----|-----|-----|-----|-----|----|-----|----|---|
| ENSP00000331514            | ENSG00000184009 | ACTG1    | 3448 | 137 | 133 | 123 | 70 | 167 | 80 | 104 | 70 | 91 | 62 | 236 | 75 | 72 | 49 | 89 | 114 | 182 | 110 | 61 | 173 | 116 | 87 | 149 | 104 | 134 | 197 | 104 | 91 | 180 | 88 |   |
| ENSP00000331666            | ENSG00000163631 | ALB      | 34   | 3   | 0   | 1   | 4  | 1   | 1  | 0   | 0  | 0  | 0  | 0   | 16 | 2  | 0  | 4  | 0   | 1   | 1   | 0  | 0   | 0   | 0  | 0   | 0   | 0   | 0   | 0   | 0  | 0   | 0  |   |
| ENSP00000331672            | ENSG00000177034 | MTX3     | 18   | 0   | 0   | 0   | 0  | 2   | 2  | 2   | 0  | 0  | 0  | 0   | 0  | 0  | 0  | 0  | 3   | 1   | 1   | 1  | 0   | 1   | 1  | 2   | 0   | 2   | 0   | 0   | 0  | 0   |    |   |
| ENSP00000331678            | ENSG00000184363 | PKP3     | 297  | 13  | 10  | 7   | 9  | 12  | 4  | 10  | 8  | 10 | 9  | 12  | 11 | 10 | 14 | 15 | 15  | 14  | 12  | 5  | 10  | 8   | 9  | 7   | 9   | 25  | 14  | 13  | 1  | 0   | 1  |   |
| ENSP00000331679            | ENSG00000102054 | RBBP7    | 284  | 13  | 9   | 11  | 7  | 10  | 10 | 9   | 5  | 7  | 4  | 16  | 5  | 5  | 10 | 8  | 6   | 10  | 15  | 12 | 10  | 11  | 7  | 12  | 3   | 11  | 19  | 6   | 8  | 14  | 11 |   |
| ENSP00000331710            | ENSG00000120925 | RNF170   | 10   | 2   | 0   | 1   | 0  | 1   | 0  | 0   | 0  | 0  | 1  | 0   | 0  | 0  | 0  | 1  | 0   | 1   | 1   | 0  | 1   | 1   | 0  | 0   | 0   | 0   | 0   | 0   | 0  | 0   | 0  |   |
| ENSP00000331719            | ENSG00000185813 | PCYT2    | 66   | 4   | 4   | 4   | 2  | 6   | 4  | 0   | 3  | 1  | 2  | 1   | 0  | 3  | 2  | 1  | 2   | 2   | 1   | 3  | 2   | 2   | 1  | 0   | 0   | 6   | 5   | 5   | 0  | 0   | 0  |   |
| ENSP00000331748            | ENSG00000206418 | RAB12    | 34   | 4   | 3   | 0   | 0  | 0   | 0  | 2   | 1  | 1  | 0  | 1   | 1  | 1  | 0  | 0  | 1   | 2   | 3   | 0  | 1   | 1   | 0  | 2   | 1   | 3   | 2   | 0   | 3  | 0   | 1  |   |
| ENSP00000331775,ENSP000001 | ENSG00000169756 | LIMS1    | 41   | 1   | 1   | 1   | 1  | 1   | 1  | 1   | 1  | 1  | 1  | 5   | 1  | 1  | 1  | 2  | 1   | 1   | 2   | 1  | 1   | 1   | 1  | 2   | 1   | 2   | 2   | 3   | 1  | 1   | 1  |   |
| ENSP00000331787            | ENSG00000185432 | MTTL7A   | 24   | 0   | 0   | 0   | 2  | 6   | 4  | 1   | 0  | 1  | 0  | 0   | 1  | 0  | 0  | 0  | 0   | 0   | 0   | 1  | 0   | 0   | 1  | 1   | 2   | 0   | 2   | 2   | 0  | 0   | 0  |   |
| ENSP00000331815            | ENSG00000183751 | TBL3     | 207  | 5   | 5   | 3   | 2  | 2   | 1  | 8   | 6  | 6  | 3  | 12  | 7  | 10 | 3  | 8  | 5   | 12  | 10  | 11 | 8   | 3   | 6  | 13  | 7   | 6   | 9   | 6   | 7  | 15  | 8  |   |
| ENSP00000331817            | ENSG00000183684 | THOC4    | 405  | 22  | 18  | 6   | 5  | 15  | 13 | 6   | 2  | 18 | 10 | 28  | 11 | 10 | 7  | 17 | 16  | 12  | 15  | 9  | 16  | 22  | 8  | 20  | 14  | 15  | 12  | 7   | 8  | 27  | 16 |   |
| ENSP00000331849            | ENSG00000183617 | MRPL54   | 36   | 1   | 1   | 2   | 1  | 1   | 1  | 1   | 1  | 1  | 1  | 2   | 1  | 1  | 1  | 1  | 1   | 2   | 1   | 1  | 1   | 1   | 2  | 2   | 1   | 1   | 2   | 1   | 1  | 1   | 1  |   |
| ENSP00000331897            | ENSG00000182054 | IDH2     | 710  | 20  | 11  | 12  | 41 | 40  | 55 | 36  | 19 | 34 | 2  | 17  | 13 | 10 | 2  | 12 | 10  | 13  | 14  | 33 | 24  | 19  | 15 | 30  | 21  | 68  | 65  | 49  | 8  | 10  | 7  |   |
| ENSP00000331907            | ENSG00000134815 | DHX34    | 17   | 0   | 0   | 0   | 2  | 0   | 0  | 0   | 2  | 0  | 1  | 0   | 0  | 1  | 1  | 0  | 2   | 1   | 1   | 1  | 2   | 0   | 0  | 0   | 0   | 1   | 1   | 0   | 1  | 0   | 0  |   |
| ENSP00000331983            | ENSG00000079691 | LRRC16A  | 146  | 4   | 3   | 2   | 12 | 17  | 10 | 5   | 7  | 2  | 0  | 1   | 0  | 4  | 3  | 4  | 4   | 4   | 5   | 4  | 7   | 3   | 4  | 7   | 3   | 8   | 9   | 7   | 2  | 2   | 3  |   |
| ENSP00000332073,ENSP000001 | ENSG00000131446 | MGAT1    | 16   | 3   | 1   | 1   | 2  | 0   | 2  | 0   | 1  | 0  | 0  | 0   | 0  | 0  | 0  | 0  | 0   | 0   | 2   | 0  | 0   | 1   | 0  | 2   | 0   | 0   | 1   | 0   | 0  | 0   | 0  |   |
| ENSP00000332118            | ENSG00000182580 | EPHB3    | 48   | 0   | 0   | 0   | 1  | 0   | 1  | 0   | 1  | 1  | 1  | 1   | 0  | 0  | 2  | 0  | 1   | 1   | 0   | 0  | 0   | 1   | 0  | 0   | 1   | 14  | 16  | 6   | 0  | 0   | 1  |   |
| ENSP00000332198            | ENSG00000182117 | NOP10    | 68   | 2   | 1   | 1   | 1  | 3   | 1  | 1   | 1  | 1  | 1  | 2   | 4  | 2  | 3  | 2  | 2   | 5   | 1   | 2  | 4   | 1   | 2  | 3   | 3   | 5   | 3   | 2   | 4  | 4   | 1  |   |
| ENSP00000332256            | ENSG00000184254 | ALDH1A3  | 107  | 1   | 1   | 2   | 0  | 0   | 0  | 1   | 1  | 1  | 1  | 4   | 9  | 7  | 1  | 1  | 1   | 11  | 12  | 18 | 1   | 2   | 1  | 7   | 10  | 5   | 1   | 1   | 2  | 1   | 3  | 2 |
| ENSP00000332340            | ENSG00000182810 | DDX28    | 30   | 2   | 1   | 3   | 1  | 0   | 0  | 1   | 1  | 0  | 1  | 0   | 0  | 0  | 1  | 0  | 1   | 4   | 1   | 0  | 0   | 0   | 2  | 2   | 1   | 1   | 1   | 2   | 1  | 2   | 2  | 1 |
| ENSP00000332373,ENSP000001 | ENSG00000064607 | SFRS14   | 90   | 2   | 1   | 3   | 5  | 4   | 1  | 2   | 2  | 1  | 1  | 4   | 2  | 4  | 0  | 0  | 1   | 3   | 1   | 1  | 2   | 4   | 1  | 6   | 9   | 8   | 8   | 4   | 3  | 4   | 1  | 3 |
| ENSP00000332444            | ENSG00000177613 | CSTF2T   | 114  | 7   | 2   | 2   | 3  | 2   | 4  | 2   | 2  | 4  | 3  | 5   | 2  | 6  | 4  | 4  | 2   | 3   | 5   | 4  | 3   | 4   | 3  | 4   | 3   | 4   | 6   | 4   | 7  | 2   | 4  | 8 |
| ENSP00000332698            | ENSG00000185122 | HSF1     | 38   | 0   | 0   | 1   | 2  | 1   | 1  | 2   | 1  | 2  | 1  | 1   | 0  | 2  | 3  | 0  | 1   | 3   | 2   | 1  | 3   | 1   | 0  | 0   | 0   | 2   | 2   | 0   | 2  | 2   | 2  | 2 |
| ENSP00000332790            | ENSG00000184270 | HIST2H2A | 325  | 6   | 19  | 1   | 0  | 2   | 15 | 2   | 2  | 13 | 4  | 52  | 9  | 6  | 1  | 15 | 3   | 1   | 8   | 1  | 4   | 17  | 3  | 22  | 16  | 8   | 18  | 15  | 6  | 37  | 19 |   |
| ENSP00000332876            | ENSG00000185602 | ACO03070 | 13   | 0   | 0   | 0   | 3  | 0   | 2  | 1   | 0  | 0  | 0  | 0   | 0  | 0  | 0  | 0  | 0   | 1   | 2   | 1  | 0   | 0   | 0  | 0   | 1   | 1   | 0   | 0   | 0  | 0   | 0  | 0 |
| ENSP00000332887            | ENSG00000184076 | UQCR10   | 79   | 2   | 2   | 1   | 1  | 3   | 3  | 4   | 4  | 2  | 1  | 3   | 1  | 3  | 2  | 3  | 3   | 3   | 4   | 7  | 1   | 3   | 3  | 3   | 2   | 3   | 5   | 1   | 1  | 3   | 2  |   |
| ENSP00000332952            | ENSG00000183808 | RBM12B   | 50   | 1   | 2   | 0   | 1  | 0   | 1  | 2   | 3  | 1  | 0  | 1   | 1  | 1  | 0  | 0  | 1   | 2   | 4   | 3  | 3   | 4   | 0  | 2   | 2   | 2   | 1   | 1   | 1  | 3   | 5  | 2 |
| ENSP00000332973            | ENSG00000166949 | SMAD3    | 25   | 3   | 2   | 0   | 0  | 0   | 0  | 1   | 1  | 2  | 0  | 0   | 0  | 0  | 0  | 0  | 2   | 1   | 3   | 2  | 2   | 0   | 1  | 2   | 0   | 1   | 1   | 1   | 0  | 0   | 1  | 0 |
| ENSP00000333001            | ENSG00000131795 | RBM8A    | 199  | 7   | 4   | 8   | 3  | 8   | 4  | 3   | 5  | 6  | 3  | 8   | 5  | 5  | 8  | 7  | 4   | 7   | 8   | 9  | 11  | 9   | 7  | 13  | 8   | 7   | 6   | 4   | 6  | 11  | 5  |   |
| ENSP00000333298            | ENSG00000185896 | LAMP1    | 67   | 6   | 3   | 2   | 1  | 5   | 2  | 5   | 4  | 3  | 1  | 1   | 1  | 2  | 2  | 1  | 2   | 3   | 3   | 2  | 0   | 1   | 2  | 0   | 2   | 4   | 4   | 2   | 1  | 1   | 2  |   |
| ENSP00000333401            | ENSG00000185608 | MRPL40   | 88   | 4   | 3   | 3   | 0  | 1   | 2  | 1   | 2  | 8  | 2  | 6   | 1  | 2  | 2  | 4  | 2   | 4   | 4   | 2  | 2   | 2   | 3  | 5   | 2   | 3   | 5   | 1   | 2  | 6   | 4  |   |
| ENSP00000333547            | ENSG00000185236 | RAB11B   | 241  | 11  | 6   | 3   | 7  | 14  | 16 | 9   | 7  | 8  | 2  | 12  | 5  | 8  | 2  | 8  | 9   | 8   | 10  | 8  | 10  | 9   | 4  | 10  | 6   | 9   | 13  | 7   | 4  | 9   | 7  |   |
| ENSP00000333551            | ENSG00000147471 | PROSC    | 51   | 2   | 1   | 1   | 0  | 0   | 2  | 0   | 0  | 0  | 0  | 4   | 1  | 2  | 0  | 0  | 1   | 3   | 3   | 2  | 0   | 0   | 0  | 1   | 1   | 2   | 6   | 5   | 2  | 2   | 7  | 3 |
| ENSP00000333602,ENSP000001 | ENSG00000183495 | EP400    | 38   | 2   | 0   | 2   | 0  | 0   | 1  | 1   | 1  | 0  | 0  | 2   | 1  | 1  | 2  | 1  | 0   | 2   | 0   | 2  | 4   | 2   | 4  | 4   | 0   | 3   | 0   | 1   | 1  | 0   | 1  | 0 |
| ENSP00000333656,ENSP000001 | ENSG00000185187 | SIGIRR   | 77   | 2   | 2   | 5   | 1  | 6   | 3  | 4   | 7  | 4  | 3  | 3   | 0  | 2  | 2  | 1  | 1   | 2   | 1   | 0  | 2   | 5   | 0  | 3   | 2   | 1   | 7   | 6   | 4  | 0   | 0  | 0 |
| ENSP00000333664            | ENSG00000060971 | ACAA1    | 271  | 12  | 18  | 7   | 2  | 6   | 8  | 5   | 10 | 13 | 3  | 11  | 5  | 10 | 3  | 8  | 10  | 4   | 3   | 1  | 9   | 13  | 13 | 16  | 17  | 17  | 17  | 13  | 7  | 5   | 5  |   |
| ENSP00000333666            | ENSG00000182551 | ADI1     | 78   | 3   | 2   | 4   | 2  | 1   | 3  | 1   | 1  | 2  | 3  | 2   | 0  | 2  | 2  | 3  | 3   | 1   | 4   | 5  | 9   | 5   | 1  | 1   | 1   | 1   | 4   | 4   | 3  | 2   | 2  | 2 |
| ENSP00000333667            | ENSG00000182199 | SHMT2    | 615  | 16  | 13  | 16  | 12 | 19  | 10 | 19  | 13 | 22 | 22 | 34  | 25 | 14 | 17 | 15 | 20  | 18  | 17  | 14 | 17  | 22  | 28 | 30  | 19  | 22  | 31  | 20  | 31 | 35  | 24 |   |
| ENSP00000333799            | ENSG00000174374 | WBSCR16  | 32   | 1   | 2   | 2   | 1  | 3   | 1  | 2   | 0  | 0  | 0  | 1   | 1  | 1  | 0  | 0  | 2   | 2   | 0   | 1  | 2   | 0   | 1  | 1   | 0   | 2   | 1   | 0   | 2  | 1   | 2  | 2 |
| ENSP00000333811            | ENSG00000185627 | PSMD13   | 335  | 19  | 11  | 7   | 8  | 10  | 6  | 9   | 7  | 5  | 5  | 14  | 13 | 9  | 10 | 15 | 10  | 16  | 12  | 10 | 11  | 10  | 5  | 6   | 9   | 14  | 20  | 13  | 12 | 24  | 15 |   |
| ENSP00000333837            | ENSG00000183093 | MRPL12   | 139  | 5   | 4   | 8   | 2  | 6   | 5  | 5   | 5  | 4  | 6  | 4   | 7  | 3  | 2  | 2  | 6   | 7   | 6   | 7  | 4   | 4   | 3  | 6   | 6   | 6   | 7   | 2   | 4  | 2   | 1  |   |
| ENSP00000333873            | ENSG00000185043 | CIB1     | 49   | 0   | 0   | 1   | 4  | 3   | 5  | 3   | 4  | 0  | 0  | 0   | 0  | 2  | 1  | 1  | 4   | 2   | 0   | 2  | 0   | 1   | 3  | 0   | 1   | 2   | 2   | 2   | 2  | 0   | 0  | 0 |
| ENSP00000333896            | ENSG00000162302 | RPS6KA4  | 25   | 2   | 2   | 2   | 1  | 0   | 1  | 1   | 0  | 2  | 0  | 2   | 0  | 1  | 0  | 1  | 0   | 0   | 2   | 0  | 1   | 0   | 0  | 4   | 0   | 0   | 0   | 0   | 0  | 0   | 2  | 1 |
| ENSP00000333920,ENSP000001 | ENSG00000125482 | TTF1     | 13   | 1   | 0   | 0   | 0  | 0   | 1  | 0   | 0  | 1  | 0  | 1   | 0  | 0  | 1  | 1  | 0   | 0   | 0   | 0  | 0   | 0   | 0  | 0   | 2   | 0   | 0   | 0   | 2  | 1   | 2  |   |
| ENSP00000333928,ENSP000001 | ENSG00000165115 | KIF27    | 13   | 0   | 0   | 0   | 2  | 2   | 0  | 1   | 0  | 0  | 0  | 0   | 0  | 1  | 2  | 0  | 0   | 0   | 1   | 2  | 0   | 0   | 0  | 0   | 0   | 0   | 0   | 0   | 0  | 0   | 0  | 0 |
| ENSP00000333934,ENSP000001 | ENSG00000066651 | TRMT11   | 24   | 1   | 0   | 0   | 0  | 0   | 1  | 0   | 1  | 0  | 0  | 0   | 0  | 1  | 0  | 0  | 0   | 0   | 2   | 0  | 3   | 3   | 2  | 0   | 1   | 0   | 2   | 0   | 2  | 3   | 2  |   |
| ENSP00000333948            | ENSG00000187051 | RPS19BP1 | 52   | 0   | 0   | 1   | 2  | 2   | 0  | 1   | 3  | 0  | 1  | 4   | 2  | 1  | 1  | 2  | 2   | 4   | 2   | 3  | 3   | 1   | 2  | 2   | 2   | 2   | 1   | 0   | 2  | 2   | 1  | 3 |
| ENSP00000333950            | ENSG00000186031 | FMN1     | 14   | 1   | 0   | 0   | 4  | 1   | 2  | 1   | 1  | 0  | 0  | 0   | 0  | 0  | 1  | 0  | 0   | 0   | 0   | 0  | 0   | 1   | 1  | 0   | 1   | 0   | 0   | 0   | 0  | 0   | 0  | 0 |
| ENSP00000333994            | ENSG00000221842 | PARVA    | 42   | 3   | 1   | 2   | 2  | 2   | 5  | 1   | 1  | 0  | 0  | 1   | 1  | 1  | 2  | 1  | 0   | 1   | 1   | 0  | 0   | 0   | 0  | 1   | 1   | 3   | 3   | 6   | 1  | 1   | 1  | 1 |
| ENSP00000334008            | ENSG00000197702 | ADAP3    | 80   | 3   | 4   | 2   | 2  | 3   | 2  | 2   | 1  | 3  | 1  | 4   | 3  | 4  | 2  | 4  | 4   | 0   | 4   | 4  |     |     |    |     |     |     |     |     |    |     |    |   |

ENSP00000335632,ENSP000003:ENSG00000187446  
ENSP00000335636,ENSP000003:ENSG00000173418  
ENSP00000335655 ENSG00000161791  
ENSP00000335808 ENSG00000172775  
ENSP00000336579,ENSP000003:ENSG00000183010  
ENSP00000336580,ENSP000003:ENSG00000123130  
ENSP00000336606 ENSG00000197275  
ENSP00000336666 ENSG00000106367  
ENSP00000336687,ENSP000003:ENSG00000122565  
ENSP00000336701 ENSG00000108384  
ENSP00000336702,ENSP000003:ENSG00000132507  
ENSP00000336712,ENSP000003:ENSG000000083312  
ENSP00000336720 ENSG00000100364  
ENSP00000336735 ENSG00000129116  
ENSP00000336741 ENSG00000109606  
ENSP00000336744 ENSG00000168765  
ENSP00000336747 ENSG00000127946  
ENSP00000336824,ENSP000003:ENSG00000065613  
ENSP00000336831 ENSG00000120756  
ENSP00000336842 ENSG00000113812  
ENSP00000336856,ENSP000003:ENSG00000140382  
ENSP00000336888,ENSP000003:ENSG00000129353  
ENSP00000336923 ENSG000000071205  
ENSP00000336994 ENSG00000104853  
ENSP00000337053 ENSG00000071537  
ENSP00000337060,ENSP000003:ENSG0000011052  
ENSP00000337125 ENSG00000100796  
ENSP00000337132,ENSP000003:ENSG00000071626  
ENSP00000337159 ENSG000000039319  
ENSP00000337190,ENSP000003:ENSG00000131069  
ENSP00000337194 ENSG00000112739  
ENSP00000337196 ENSG000000087263  
ENSP00000337313 ENSG00000033030  
ENSP00000337358,ENSP000003:ENSG00000069998  
ENSP00000337405,ENSP000003:ENSG00000126226  
ENSP00000337443 ENSG00000167693  
ENSP00000337445 ENSG00000006744  
ENSP00000337448 ENSG00000119383  
ENSP00000337476,ENSP000003:ENSG00000141425  
ENSP00000337513 ENSG00000213523  
ENSP00000337518 ENSG00000108592  
ENSP00000337541,ENSP000003:ENSG00000172661  
ENSP00000337623 ENSG00000136104  
ENSP00000337632 ENSG00000205323  
ENSP00000337641 ENSG00000154001  
ENSP00000337669,ENSP000003:ENSG00000070831  
ENSP00000337688 ENSG00000008952  
ENSP00000337701,ENSP000003:ENSG00000177662  
ENSP00000337736 ENSG00000121057  
ENSP00000337773,ENSP000003:ENSG00000124588  
ENSP00000337776,ENSP000003:ENSG00000123992  
ENSP00000337804 ENSG00000155761  
ENSP00000337825,ENSP000003:ENSG00000182866  
ENSP00000337838 ENSG00000115310  
ENSP00000337907,ENSP000003:ENSG00000150054  
ENSP00000337991,ENSP000003:ENSG00000179119  
ENSP00000338034 ENSG00000176422  
ENSP00000338104,ENSP000003:ENSG00000164830  
ENSP00000338141,ENSP000003:ENSG00000114209  
ENSP00000338160,ENSP000003:ENSG00000090600  
ENSP00000338173,ENSP000003:ENSG00000055917  
ENSP00000338185 ENSG00000182621  
ENSP00000338186,ENSP000003:ENSG00000074266  
ENSP00000338191 ENSG00000168807  
ENSP00000338218 ENSG00000173821  
ENSP00000338235 ENSG00000147649  
ENSP00000338258 ENSG00000179604  
ENSP00000338302,ENSP000003:ENSG00000163939  
ENSP00000338323,ENSP000003:ENSG00000104529  
ENSP00000338352 ENSG00000173598  
ENSP00000338379,ENSP000003:ENSG00000100266  
ENSP00000338422 ENSG00000100284  
ENSP00000338523 ENSG00000075420  
ENSP00000338562,ENSP000003:ENSG00000166900  
ENSP00000338573,ENSP000003:ENSG00000130119  
ENSP00000338576 ENSG00000100345  
ENSP00000338607 ENSG00000130193  
ENSP00000338615,ENSP000003:ENSG00000175029  
ENSP00000338673,ENSP000003:ENSG00000185324  
ENSP00000338703 ENSG00000169764  
ENSP00000338711 ENSG00000121236  
ENSP00000338718 ENSG00000168488  
ENSP00000338727 ENSG000000993167  
ENSP00000338728 ENSG00000115355  
ENSP00000338788 ENSG00000066548  
ENSP00000338814,ENSP000003:ENSG00000166170  
ENSP00000338844,ENSP000003:ENSG00000101310  
ENSP00000338862 ENSG00000113460  
ENSP00000338919,ENSP000003:ENSG00000158290  
ENSP00000338989,ENSP000003:ENSG00000108448  
ENSP00000338990 ENSG00000123395  
ENSP00000339007,ENSP000003:ENSG00000177885  
ENSP00000339016,ENSP000003:ENSG00000138138  
ENSP00000339027,ENSP000003:ENSG00000089157  
ENSP00000339035 ENSG00000143549  
ENSP00000339063,ENSP000003:ENSG00000156508  
ENSP00000339090,ENSP000003:ENSG00000134597  
ENSP00000339095,ENSP000003:ENSG00000171863  
ENSP00000339109 ENSG00000153107

AC012652  
NAT5  
FMNL3  
FAM192A  
PYCR1  
ACOT9  
RAD54B  
AP1S1  
CBX3  
RDX3  
RBD51C  
EIF5A  
TNPO1  
C22orf9  
PALD  
DHX15  
GSTM4  
HIP1  
SLK  
PLS1  
ACTR8  
HMG20A  
SLC44A2  
ARHGAP1  
CLPTM1  
SELL1  
SMEK1  
DAZAP1  
ZFYVE16  
ACSS2  
PRPF4B  
EGFOD1  
ZCCHC8  
CECR5  
PCID2  
NXN  
ELAC2  
PPP2R4  
RPRD1A  
SRA1  
FTSJ3  
FAM21C  
RNASEH2  
SARNP  
PPP2R5E  
CDC42  
SEC62  
PNPLA2  
AKAP1  
NQO2  
DNPEP  
SPAG17  
LCK  
RTN4  
MPY7  
SPRY2D1  
SPRYD4  
OXR1  
PDCD10  
FKBP5  
PUM2  
PLCB1  
EED  
SNTB2  
RNF213  
MTDH  
CDC42EP2  
PBRM1  
EEF1D  
NUDT4  
PACSLN2  
TOM1  
FNDC3B  
STX3  
GNL3L  
MYH9  
C8orf55  
CTBP2  
CDK10  
UGP2  
TRIM6  
ATXN2L  
LRRFIP2  
CCDC88A  
ZC3H15  
BAG5  
SEC23B  
BRIX1  
CUL4B  
TRIM16L  
C12orf44  
GRB2  
ATAD1  
RPLP0  
TPM3  
EEF1A1  
RBMX2  
RPS7  
ANAPC1

131 6 3 4 3 4 3 2 4 3 2 7 4 4 4 6 3 5 4 2 2 5 5 7 5 3 8 6 4 7 6  
32 0 1 1 2 2 1 2 1 0 0 0 0 2 2 1 1 1 2 3 1 2 1 1 0 1 1 0 1 1 1  
39 3 2 0 1 0 0 1 0 0 0 1 0 2 1 2 3 0 0 1 3 1 1 2 0 1 1 2 2 5 4  
74 7 1 3 3 1 3 1 2 3 1 5 1 1 3 3 2 2 2 3 4 3 1 3 2 2 3 1 2 3 3  
346 16 9 3 9 12 16 10 2 6 2 9 4 11 1 12 18 24 19 19 19 20 1 11 10 16 15 12 8 18 14  
66 2 3 1 2 3 2 0 0 0 2 11 2 1 0 0 7 2 2 3 1 1 2 4 1 2 1 1 2 6 2  
10 0 0 1 0 1 0 0 1 0 1 0 0 0 0 0 1 0 0 2 0 1 0 0 1 0 0 1 0 0  
75 3 2 4 2 4 3 3 2 4 1 1 1 4 4 2 1 0 2 3 2 3 2 2 3 4 4 3 2 2 2  
797 44 21 41 16 27 20 21 16 18 30 54 22 16 42 21 20 27 20 23 31 22 31 29 15 31 35 16 35 33 20  
13 0 0 1 1 1 0 0 0 0 0 0 0 1 1 1 2 0 0 1 2 2 0 0 0 0 0 0 0 0  
474 14 10 8 14 15 16 12 6 10 9 15 9 17 19 17 15 23 19 21 19 24 9 12 13 23 17 24 26 18 20  
321 13 15 15 8 9 7 9 6 8 4 10 5 10 12 11 12 13 11 13 18 14 12 8 7 9 11 9 14 17 11  
17 0 0 0 1 0 1 1 0 0 0 0 1 1 1 0 1 3 1 1 2 0 0 1 0 0 1 1 0 0 0  
29 0 0 1 0 0 0 1 0 0 0 0 0 0 1 2 1 3 2 2 1 1 0 2 4 2 2 0 1 2 1 0  
534 18 16 14 16 22 15 18 11 14 6 16 10 16 13 15 20 21 20 16 21 22 18 26 21 21 20 15 26 27 20  
15 0 1 1 0 0 0 1 0 1 0 1 0 0 0 0 1 0 0 1 0 0 1 0 0 1 0 0 3 3 1  
65 1 1 1 0 0 0 0 1 0 1 4 1 2 3 4 4 0 0 3 3 7 8 7 2 4 1 1 0 0 2 1 3  
310 7 6 11 13 17 12 12 11 6 1 5 2 5 9 5 6 10 10 17 11 11 16 17 14 15 16 12 13 9 11  
456 12 13 12 18 26 23 20 10 19 1 11 8 15 9 13 11 15 11 14 12 19 9 20 17 25 27 25 14 15 12  
10 0 0 0 0 0 0 0 0 1 0 1 0 0 0 0 2 1 1 2 0 0 1 0 0 0 1 0 0 0  
19 2 0 0 1 0 1 0 0 1 0 1 1 1 0 1 0 0 0 0 1 1 0 1 2 0 2 1 1 1 0  
34 1 1 3 2 1 0 2 4 2 0 0 0 2 2 1 0 2 1 3 2 2 0 1 0 2 0 0 0 0 0  
29 1 2 2 1 0 0 1 0 1 0 1 0 0 2 1 0 2 2 2 2 4 0 1 0 0 2 1 1 1 0  
44 4 2 3 4 2 1 3 1 3 2 2 0 1 1 0 2 1 1 3 1 2 0 0 0 0 3 0 1 1 0  
56 3 2 1 4 2 4 3 4 2 0 2 1 0 0 0 1 5 1 0 0 1 5 1 2 4 3 1 1 3  
369 18 15 14 7 15 15 12 4 9 2 14 8 10 9 11 14 15 18 13 15 7 4 11 6 17 20 19 11 22 14  
132 4 3 4 6 4 5 5 2 2 1 8 5 5 1 5 1 6 5 4 3 4 5 8 4 4 6 5 8 4 5  
56 3 1 0 0 0 2 0 0 2 0 4 2 0 0 2 4 2 1 0 1 1 0 5 5 2 7 2 1 5 4  
34 1 0 0 1 0 1 1 0 0 0 0 0 4 0 3 1 2 2 3 2 3 0 0 0 0 1 2 2 1 4  
38 2 2 0 1 0 1 1 1 1 1 1 0 0 1 1 0 3 0 2 3 3 0 2 1 5 3 1 1 1 0  
220 6 6 5 5 4 10 4 3 6 4 15 7 4 1 4 9 12 10 6 7 7 7 10 11 6 12 8 10 14 7  
55 4 2 1 1 0 1 2 0 0 0 1 0 4 2 2 2 1 2 3 4 2 0 0 3 4 1 2 0 2 6 3  
100 3 2 1 5 2 2 3 4 3 2 5 1 2 1 3 2 1 2 4 5 9 6 14 9 0 3 3 0 2 1  
179 6 7 2 3 4 5 1 1 3 2 9 5 5 3 8 5 6 6 5 7 7 5 9 12 7 7 5 5 17 12  
40 1 0 0 5 1 1 4 3 1 0 1 1 0 0 1 0 1 1 3 1 1 1 1 0 1 2 0 3 2 3  
14 0 0 0 0 0 0 0 0 3 0 0 1 1 0 1 2 1 3 1 0 1 0 0 0 0 0 0 0 0  
114 2 4 1 1 2 3 1 0 2 0 6 1 4 1 6 4 4 6 5 5 5 1 6 3 4 10 5 4 10 8  
79 2 3 2 4 5 4 3 1 0 4 1 4 0 2 2 1 2 4 3 4 0 2 1 2 5 2 3 6 6  
63 0 0 0 1 1 2 3 0 0 1 0 1 4 2 3 5 6 3 2 3 3 2 0 1 5 1 2 4 4 4  
15 1 0 1 0 0 1 0 0 0 0 1 0 0 1 0 0 0 1 0 2 0 1 0 1 2 1 0 1 0  
332 19 9 12 5 9 7 8 7 6 10 18 9 11 10 12 13 12 8 13 9 15 17 13 9 11 8 13 16 11  
106 6 3 3 3 6 2 2 3 6 0 6 1 0 3 4 3 3 4 6 5 6 0 2 4 3 6 2 3 5 6  
11 2 1 1 0 1 0 0 0 0 2 0 0 0 0 0 0 0 0 0 1 1 1 0 0 0 0 1 0 0  
123 5 3 4 3 8 5 2 4 1 5 2 5 2 7 3 3 5 3 7 7 6 7 3 2 2 5 1 7 4 2  
32 1 1 1 2 1 1 1 2 0 0 0 2 1 2 0 0 0 1 1 3 1 0 2 3 0 1 1 0 3  
120 7 4 3 0 1 4 3 1 6 0 9 3 2 1 5 4 3 9 2 1 6 1 3 5 2 12 6 1 11 5  
81 6 2 3 3 2 2 3 4 3 2 3 2 3 2 3 1 2 4 5 4 4 2 2 2 2 2 3 1 2  
16 0 0 0 0 0 0 1 2 1 0 0 0 0 1 2 1 0 0 1 2 0 0 0 0 0 1 0 1 1  
98 4 2 4 3 1 2 5 1 3 4 7 1 0 4 0 1 0 0 2 3 0 10 8 15 4 4 3 2 3 2  
42 1 1 1 1 2 1 2 1 0 0 0 0 0 1 1 0 3 1 2 1 4 1 2 2 1 0 0 3 7 3  
68 1 2 3 3 3 2 4 3 2 2 1 1 2 2 1 2 2 1 3 4 3 4 2 2 5 1 2 2 2 1  
14 0 0 0 0 0 1 0 1 0 0 0 0 1 2 0 2 2 0 1 0 0 0 1 1 0 0 2 0 0  
53 1 1 2 2 9 6 1 4 1 1 2 1 1 2 1 0 1 1 2 1 1 1 1 1 2 2 1 2 1 1  
94 7 5 1 1 1 4 2 1 3 1 7 3 0 1 7 3 2 5 0 1 4 1 6 3 2 5 4 3 6 5  
36 4 2 1 1 1 0 1 1 1 1 1 2 0 1 0 3 5 1 1 2 1 1 1 1 1 2 1 0 0 0  
10 1 0 0 0 0 0 1 0 0 0 0 0 2 0 0 0 0 2 0 0 0 1 1 0 0 0 0 1 0 2  
70 2 2 1 2 1 3 2 1 1 0 2 2 1 1 2 0 2 1 5 4 2 1 3 2 3 9 2 3 6 4  
61 0 1 0 0 1 2 1 3 1 3 10 8 4 1 1 1 1 1 1 1 1 0 0 1 4 3 3 2 2 4  
141 8 5 5 3 7 6 5 3 8 0 6 3 4 3 4 4 5 3 8 4 7 1 4 4 4 6 5 4 8 4  
186 6 3 2 4 3 5 10 8 7 3 8 3 5 3 6 8 10 12 5 10 9 4 4 2 4 9 7 5 14 7  
52 2 1 1 3 2 0 2 0 1 0 1 0 2 2 2 2 1 3 5 6 2 1 0 1 0 1 1 2 5 4 1  
11 5 0 0 1 0 1 0 1 0 0 0 1 0 0 0 0 0 0 0 0 0 0 0 1 0 0 0 0 1  
37 4 3 1 3 1 1 4 1 0 0 1 3 2 0 0 1 1 0 4 2 2 1 0 0 1 1 0 0 0 2  
23 0 2 3 0 0 0 0 1 1 1 0 0 1 3 1 0 1 0 2 1 0 2 0 1 0 0 0 1 0 2  
166 0 2 1 11 4 3 26 14 10 0 2 1 5 1 1 2 0 2 19 16 12 1 7 3 9 7 4 1 2 0  
352 5 4 8 10 12 10 8 13 5 14 14 6 7 13 11 9 14 11 12 21 10 15 14 10 10 12 7 29 23 15  
40 1 0 2 3 4 1 3 2 3 0 1 0 0 1 1 0 3 0 1 3 0 0 0 0 5 5 0 0 1 0  
128 6 5 5 5 6 2 5 2 0 3 5 2 4 4 4 2 4 6 5 7 6 6 3 5 8 5 0 6 3 4  
459 29 14 16 11 16 11 5 14 7 18 7 15 12 15 18 20 14 9 24 14 17 10 18 26 16 19 23 16  
37 1 2 2 1 1 1 2 1 3 0 1 1 2 1 1 1 0 0 1 2 1 1 1 1 2 2 1 2 1 1  
162 13 6 9 4 9 9 4 4 3 2 3 4 6 4 6 3 5 3 8 6 6 4 7 3 6 11 3 4 4 3  
84 3 3 3 6 6 5 4 4 2 1 0 1 2 2 0 3 5 1 2 2 0 1 2 1 9 8 3 5 1 0  
12 0 0 0 0 0 1 0 0 0 0 0 0 1 0 0 1 1 3 1 0 1 1 0 0 1 0 0 0 0 1  
91 8 6 6 3 3 3 4 6 1 2 2 3 3 1 4 0 1 1 1 3 2 4 3 4 2 2 7 2 2 2 1  
54 6 3 3 3 2 5 2 0 1 0 1 2 2 0 0 0 1 1 1 1 2 0 4 4 5 0 0 0 3 1 2  
3337 170 141 128 103 198 114 80 65 103 49 102 66 79 102 110 88 152 121 105 131 105 74 130 80 153 156 100 106 127 99  
100 4 2 4 6 4 5 7 2 4 2 0 4 2 2 2 0 2 3 5 4 3 4 4 4 3 5 3 4 3 2 5  
153 7 4 3 5 5 6 5 3 2 3 6 3 9 6 6 4 8 6 7 7 5 2 5 2 8 9 4 3 5 5  
32 1 1 0 2 1 1 1 0 0 0 0 1 2 1 1 2 1 1 1 1 1 1 2 1 1 1 1 1 1 3  
161 11 14 5 16 12 8 5 1 4 1 4 1 16 6 9 7 3 1 7 3 6 4 1 1 5 4 5 0 1 0  
11 0 0 0 0 0 1 0 0 0 0 0 1 0 1 0 2 1 0 1 0 0 1 0 1 0 0 0 1 0 1  
224 8 6 11 10 5 6 9 4 5 8 4 5 5 10 9 7 9 8 14 13 6 7 5 4 8 8 4 11 7 8  
52 2 1 3 1 1 1 3 1 0 1 0 0 2 2 0 1 2 1 2 2 1 4 4 1 3 5 3 2 3 0  
13 0 0 0 0 0 1 0 1 0 2 2 0 0 0 1 0 0 1 0 0 0 1 1 0 1 0 0 1 1 0  
187 10 5 5 4 4 4 5 4 4 1 3 3 7 6 11 8 6 7 12 10 8 5 8 3 7 10 5 8 7 7  
62 2 1 4 2 2 1 1 1 2 0 2 0 3 0 1 4 0 2 2 2 3 4 2 2 4 4 1 1 4 4  
124 2 11 2 6 6 12 4 3 6 0 2 0 2 2 3 3 3 5 4 5 10 1 3 5 4 5 6 2 4 3  
62 4 1 2 0 0 1 5 1 1 1 1 2 1 1 2 2 1 2 1 5 4 2 6 3 1 5 1 1 2 3  
293 12 9 5 13 7 10 10 9 7 5 17 10 10 5 15 11 13 14 15 15 13 2 9 5 10 15 5 8 5 9  
18 0 0 0 0 1 0 0 0 0 0 0 0 4 1 4 0 0 0 0 1 2 0 0 0 0 1 2 2 0 0  
11 1 0 1 1 1 0 1 0 1 0 1 0 1 0 2 1 0 0 0 0 1 0 0 0 0 0 0 0 0 0  
415 5 4 5 5 8 4 5 3 4 3 3 1 3 4 3 4 5 5 4 5 5 3 2 1 3 6 1 4 4 3 4  
127 4 2 0 1 1 2 0 2 2 1 3 1 2 0 2 1 3 1 2 1 3 1 3 2 1 2 1 2 1 0  
467 16 11 9 17 14 14 24 10 9 4 17 8 17 6 14 21 23 24 18 15 14 11 18 13 22 21 16 19 24 18  
471 18 18 22 9 17 14 18 15 17 14 10 8 11 21 17 10 18 13 10 20 14 21 25 12 20 20 13 17 16 13  
1852 97 79 27 47 49 59 52 19 62 4 72 32 67 18 58 63 65 75 84 66 96 12 64 52 73 130 64 55 127 84  
40 3 1 1 3 0 1 1 1 1 1 1 2 1 1 0 2 2 0 1 2 2 1 4 0 2 1 4 0 2 1 1  
84 6 8 0 2 2 4 2 1 5 1 2 2 1 0 3 3 2 4 1 3 4 0 2 4 2 5 4 2 6 3  
40 3 1 2 1 0 1 1 0 1 2 2 1 2 3 1 2 1 1 3 1 1 2 1 0 2 1 0 1 1 2





|                                                                                                 |                   |          |     |    |    |    |    |    |    |    |    |    |    |    |    |    |    |    |    |    |    |    |    |    |    |    |    |    |    |    |    |    |    |   |
|-------------------------------------------------------------------------------------------------|-------------------|----------|-----|----|----|----|----|----|----|----|----|----|----|----|----|----|----|----|----|----|----|----|----|----|----|----|----|----|----|----|----|----|----|---|
| ENSP00000344868                                                                                 | ENSG00000122545   | SEPT7    | 213 | 11 | 7  | 7  | 7  | 7  | 4  | 9  | 8  | 7  | 2  | 10 | 3  | 6  | 6  | 7  | 6  | 7  | 7  | 9  | 8  | 8  | 4  | 8  | 4  | 5  | 14 | 5  | 8  | 11 | 8  |   |
| ENSP00000344903,ENSP00000344900                                                                 | ENSG00000198517   | MAFK     | 30  | 0  | 0  | 0  | 1  | 1  | 1  | 2  | 2  | 1  | 2  | 2  | 2  | 1  | 1  | 0  | 1  | 1  | 1  | 1  | 1  | 1  | 2  | 2  | 1  | 1  | 0  | 0  | 1  | 1  | 1  |   |
| ENSP00000344909                                                                                 | ENSG00000184007   | PTP4A2   | 34  | 3  | 1  | 0  | 2  | 1  | 2  | 2  | 2  | 1  | 0  | 0  | 1  | 1  | 0  | 1  | 1  | 2  | 2  | 2  | 1  | 1  | 0  | 3  | 1  | 2  | 1  | 1  | 0  | 0  | 0  |   |
| ENSP00000344914,ENSP00000344925                                                                 | ENSG00000107554   | DNMBP    | 27  | 1  | 0  | 0  | 0  | 0  | 0  | 0  | 0  | 0  | 0  | 0  | 0  | 0  | 1  | 1  | 6  | 6  | 6  | 1  | 0  | 0  | 0  | 0  | 1  | 1  | 0  | 0  | 1  | 1  | 1  |   |
| ENSP00000344925                                                                                 | ENSG00000109854   | HTATIP2  | 69  | 4  | 3  | 1  | 2  | 4  | 6  | 4  | 3  | 4  | 0  | 7  | 2  | 1  | 1  | 2  | 1  | 1  | 2  | 3  | 2  | 2  | 1  | 2  | 2  | 1  | 3  | 1  | 1  | 2  | 1  |   |
| ENSP00000344942                                                                                 | ENSG00000175970   | UNC119B  | 27  | 0  | 1  | 0  | 2  | 2  | 2  | 0  | 0  | 1  | 0  | 1  | 0  | 0  | 0  | 2  | 2  | 1  | 1  | 2  | 1  | 1  | 1  | 0  | 1  | 0  | 1  | 2  | 1  | 1  | 0  | 0 |
| ENSP00000344950,ENSP00000344966                                                                 | ENSG00000174720   | LARP7    | 118 | 1  | 2  | 4  | 4  | 5  | 3  | 8  | 5  | 5  | 5  | 6  | 3  | 5  | 3  | 1  | 2  | 4  | 5  | 2  | 5  | 3  | 2  | 4  | 7  | 4  | 5  | 3  | 5  | 4  | 3  |   |
| ENSP00000344996                                                                                 | ENSG00000187867   | PALM3    | 19  | 8  | 2  | 7  | 0  | 0  | 0  | 0  | 0  | 0  | 0  | 0  | 0  | 0  | 0  | 1  | 0  | 0  | 0  | 0  | 0  | 0  | 0  | 0  | 0  | 0  | 0  | 0  | 1  | 0  | 0  |   |
| ENSP00000345083,ENSP00000345123                                                                 | ENSG00000034152   | MAP2K3   | 60  | 1  | 3  | 2  | 1  | 1  | 1  | 3  | 1  | 4  | 1  | 0  | 0  | 0  | 0  | 1  | 2  | 1  | 2  | 1  | 1  | 3  | 3  | 2  | 2  | 2  | 3  | 6  | 3  | 5  | 8  |   |
| ENSP00000345133                                                                                 | ENSG00000171219   | CDC42BP1 | 31  | 2  | 0  | 3  | 1  | 1  | 2  | 2  | 1  | 0  | 0  | 0  | 0  | 2  | 0  | 1  | 2  | 1  | 1  | 3  | 1  | 2  | 1  | 0  | 1  | 2  | 1  | 1  | 0  | 0  | 0  |   |
| ENSP00000345136,ENSP00000345162,ENSP00000345195                                                 | ENSG00000133392   | MYH11    | 640 | 27 | 31 | 21 | 22 | 37 | 24 | 22 | 15 | 27 | 9  | 17 | 9  | 17 | 14 | 19 | 20 | 25 | 29 | 15 | 28 | 26 | 14 | 22 | 19 | 24 | 32 | 19 | 13 | 22 | 21 |   |
| ENSP00000345206,ENSP00000345216                                                                 | ENSG00000062650   | WAPAL    | 96  | 3  | 3  | 4  | 4  | 4  | 2  | 4  | 5  | 5  | 1  | 2  | 1  | 3  | 2  | 3  | 2  | 3  | 3  | 6  | 4  | 4  | 3  | 5  | 3  | 3  | 3  | 2  | 3  | 4  | 2  |   |
| ENSP00000345230                                                                                 | ENSG00000188021   | UBQLN2   | 86  | 1  | 4  | 0  | 2  | 2  | 2  | 2  | 2  | 3  | 1  | 3  | 2  | 2  | 2  | 4  | 5  | 1  | 4  | 3  | 1  | 6  | 1  | 3  | 1  | 5  | 5  | 4  | 1  | 8  | 6  |   |
| ENSP00000345236                                                                                 | ENSG00000168214   | RBPJ     | 11  | 0  | 0  | 0  | 0  | 0  | 1  | 1  | 0  | 1  | 0  | 0  | 0  | 0  | 0  | 0  | 0  | 0  | 0  | 1  | 0  | 2  | 0  | 1  | 1  | 0  | 1  | 0  | 2  | 0  | 0  |   |
| ENSP00000345236,ENSP00000345230                                                                 | ENSG00000166348   | USP54    | 15  | 1  | 0  | 0  | 1  | 1  | 0  | 0  | 0  | 1  | 1  | 2  | 0  | 2  | 1  | 0  | 1  | 0  | 0  | 0  | 0  | 0  | 0  | 0  | 1  | 2  | 0  | 0  | 0  | 1  | 0  |   |
| ENSP00000345236,ENSP00000345236                                                                 | ENSG00000167460   | TPM4     | 592 | 28 | 14 | 26 | 17 | 15 | 9  | 19 | 14 | 9  | 13 | 20 | 11 | 18 | 35 | 18 | 13 | 31 | 14 | 22 | 30 | 19 | 17 | 21 | 11 | 24 | 24 | 17 | 22 | 38 | 23 |   |
| ENSP00000345282                                                                                 | ENSG00000166123   | RHOC     | 268 | 10 | 15 | 5  | 3  | 7  | 10 | 6  | 2  | 11 | 4  | 15 | 3  | 5  | 2  | 9  | 15 | 11 | 9  | 7  | 5  | 16 | 5  | 15 | 9  | 8  | 16 | 10 | 8  | 14 | 13 |   |
| ENSP00000345297,ENSP00000345308,ENSP00000345369                                                 | ENSG00000108312   | GPT2     | 47  | 4  | 2  | 2  | 2  | 2  | 0  | 2  | 2  | 1  | 1  | 1  | 1  | 0  | 1  | 1  | 2  | 0  | 2  | 2  | 2  | 2  | 0  | 1  | 2  | 1  | 2  | 2  | 2  | 3  | 3  |   |
| ENSP00000345341                                                                                 | ENSG00000148334   | UBTF     | 230 | 7  | 7  | 9  | 6  | 8  | 5  | 6  | 8  | 9  | 10 | 9  | 6  | 6  | 7  | 8  | 7  | 8  | 8  | 8  | 11 | 6  | 9  | 11 | 7  | 10 | 9  | 6  | 6  | 8  | 5  |   |
| ENSP00000345347,ENSP00000345352,ENSP00000345361,ENSP00000345393,ENSP00000345425,ENSP00000345456 | ENSG00000143569   | UBAP2L   | 224 | 9  | 4  | 8  | 5  | 8  | 5  | 7  | 6  | 4  | 3  | 4  | 3  | 10 | 14 | 5  | 4  | 11 | 6  | 7  | 16 | 8  | 7  | 11 | 3  | 14 | 8  | 4  | 11 | 10 | 9  |   |
| ENSP00000345352,ENSP00000345361,ENSP00000345393,ENSP00000345425,ENSP00000345456                 | ENSG00000189403   | PTGES2   | 59  | 2  | 1  | 1  | 0  | 2  | 2  | 1  | 1  | 2  | 0  | 2  | 0  | 1  | 0  | 1  | 2  | 4  | 2  | 1  | 1  | 3  | 1  | 3  | 4  | 2  | 3  | 4  | 4  | 5  | 4  |   |
| ENSP00000345352,ENSP00000345361,ENSP00000345393,ENSP00000345425,ENSP00000345456                 | ENSG00000154310   | HMGCB1   | 489 | 20 | 16 | 11 | 21 | 38 | 28 | 27 | 4  | 12 | 7  | 23 | 8  | 13 | 14 | 9  | 13 | 26 | 13 | 20 | 18 | 16 | 7  | 21 | 9  | 21 | 18 | 17 | 13 | 17 | 9  |   |
| ENSP00000345352,ENSP00000345361,ENSP00000345393,ENSP00000345425,ENSP00000345456                 | ENSG00000136950   | TNIK     | 28  | 1  | 2  | 1  | 5  | 1  | 2  | 1  | 1  | 0  | 1  | 1  | 2  | 0  | 0  | 1  | 2  | 1  | 1  | 0  | 0  | 1  | 0  | 1  | 0  | 2  | 0  | 1  | 0  | 0  | 0  |   |
| ENSP00000345352,ENSP00000345361,ENSP00000345393,ENSP00000345425,ENSP00000345456                 | ENSG00000185022   | ARPC5L   | 66  | 3  | 2  | 3  | 1  | 4  | 2  | 3  | 4  | 2  | 1  | 2  | 2  | 4  | 1  | 3  | 3  | 1  | 2  | 3  | 0  | 0  | 2  | 1  | 1  | 2  | 1  | 1  | 4  | 4  | 2  |   |
| ENSP00000345352,ENSP00000345361,ENSP00000345393,ENSP00000345425,ENSP00000345456                 | ENSG00000124214   | MAFF     | 46  | 1  | 1  | 0  | 1  | 2  | 1  | 2  | 3  | 1  | 3  | 2  | 3  | 1  | 2  | 0  | 1  | 1  | 1  | 2  | 3  | 1  | 3  | 2  | 2  | 0  | 0  | 0  | 1  | 3  | 3  |   |
| ENSP00000345352,ENSP00000345361,ENSP00000345393,ENSP00000345425,ENSP00000345456                 | ENSG00000140694   | STAU1    | 241 | 14 | 8  | 19 | 9  | 6  | 7  | 8  | 3  | 8  | 7  | 12 | 5  | 8  | 10 | 7  | 4  | 6  | 12 | 9  | 7  | 8  | 6  | 7  | 6  | 5  | 10 | 5  | 7  | 11 | 7  |   |
| ENSP00000345352,ENSP00000345361,ENSP00000345393,ENSP00000345425,ENSP00000345456                 | ENSG00000188313   | PARN     | 79  | 2  | 2  | 1  | 2  | 2  | 2  | 2  | 5  | 1  | 1  | 3  | 0  | 1  | 0  | 2  | 4  | 2  | 4  | 2  | 3  | 2  | 2  | 7  | 3  | 4  | 4  | 2  | 1  | 8  | 4  |   |
| ENSP00000345352,ENSP00000345361,ENSP00000345393,ENSP00000345425,ENSP00000345456                 | ENSG00000143061   | PLSCR1   | 34  | 2  | 1  | 0  | 1  | 0  | 1  | 3  | 2  | 3  | 1  | 0  | 0  | 0  | 0  | 3  | 1  | 1  | 0  | 3  | 1  | 1  | 1  | 3  | 3  | 0  | 1  | 2  | 0  | 0  | 0  |   |
| ENSP00000345352,ENSP00000345361,ENSP00000345393,ENSP00000345425,ENSP00000345456                 | ENSG00000148719   | IGSF3    | 13  | 2  | 1  | 0  | 0  | 0  | 0  | 0  | 0  | 1  | 0  | 0  | 0  | 0  | 0  | 1  | 2  | 0  | 2  | 0  | 0  | 0  | 1  | 1  | 0  | 2  | 0  | 0  | 0  | 0  | 0  |   |
| ENSP00000345352,ENSP00000345361,ENSP00000345393,ENSP00000345425,ENSP00000345456                 | ENSG00000101558   | DNAJB12  | 50  | 2  | 2  | 3  | 2  | 2  | 2  | 2  | 3  | 3  | 0  | 0  | 1  | 2  | 2  | 1  | 2  | 1  | 1  | 2  | 4  | 1  | 3  | 1  | 0  | 2  | 0  | 0  | 2  | 2  | 2  |   |
| ENSP00000345352,ENSP00000345361,ENSP00000345393,ENSP00000345425,ENSP00000345456                 | ENSG00000105669   | VAPA     | 251 | 7  | 8  | 9  | 10 | 7  | 6  | 16 | 10 | 8  | 7  | 7  | 5  | 6  | 7  | 9  | 8  | 13 | 8  | 11 | 9  | 6  | 11 | 13 | 12 | 6  | 6  | 5  | 8  | 9  | 4  |   |
| ENSP00000345352,ENSP00000345361,ENSP00000345393,ENSP00000345425,ENSP00000345456                 | ENSG00000106976   | COPE     | 151 | 9  | 7  | 1  | 8  | 8  | 9  | 1  | 3  | 6  | 0  | 3  | 0  | 3  | 3  | 5  | 5  | 2  | 2  | 3  | 10 | 3  | 3  | 5  | 2  | 10 | 13 | 8  | 3  | 10 | 6  |   |
| ENSP00000345352,ENSP00000345361,ENSP00000345393,ENSP00000345425,ENSP00000345456                 | ENSG000001108774  | DNM1     | 79  | 1  | 2  | 1  | 3  | 4  | 2  | 7  | 5  | 9  | 0  | 1  | 1  | 0  | 3  | 1  | 4  | 1  | 3  | 4  | 2  | 2  | 4  | 1  | 5  | 3  | 2  | 4  | 2  | 1  | 1  |   |
| ENSP00000345352,ENSP00000345361,ENSP00000345393,ENSP00000345425,ENSP00000345456                 | ENSG00000136827   | RAB5C    | 180 | 10 | 8  | 4  | 3  | 6  | 6  | 3  | 6  | 7  | 1  | 11 | 3  | 6  | 1  | 8  | 4  | 4  | 8  | 4  | 5  | 7  | 2  | 10 | 11 | 4  | 11 | 6  | 5  | 8  | 8  |   |
| ENSP00000345352,ENSP00000345361,ENSP00000345393,ENSP00000345425,ENSP00000345456                 | ENSG00000130816   | TOR1A    | 67  | 0  | 0  | 0  | 3  | 2  | 1  | 5  | 0  | 0  | 0  | 1  | 2  | 6  | 0  | 6  | 1  | 0  | 2  | 6  | 3  | 3  | 1  | 3  | 2  | 1  | 2  | 1  | 7  | 4  | 5  |   |
| ENSP00000345352,ENSP00000345361,ENSP00000345393,ENSP00000345425,ENSP00000345456                 | ENSG00000087053   | DNMT1    | 310 | 15 | 11 | 11 | 14 | 11 | 3  | 12 | 0  | 8  | 7  | 6  | 8  | 11 | 14 | 13 | 12 | 10 | 12 | 11 | 18 | 13 | 4  | 9  | 3  | 11 | 16 | 6  | 13 | 15 | 13 |   |
| ENSP00000345352,ENSP00000345361,ENSP00000345393,ENSP00000345425,ENSP00000345456                 | ENSG00000152556   | MTMR2    | 17  | 2  | 0  | 2  | 1  | 1  | 0  | 2  | 1  | 0  | 0  | 0  | 0  | 0  | 0  | 1  | 0  | 0  | 1  | 1  | 1  | 0  | 0  | 0  | 0  | 1  | 0  | 0  | 1  | 1  | 1  |   |
| ENSP00000345352,ENSP00000345361,ENSP00000345393,ENSP00000345425,ENSP00000345456                 | ENSG00000100403   | PFKM     | 90  | 1  | 4  | 1  | 3  | 1  | 3  | 1  | 2  | 3  | 0  | 1  | 2  | 3  | 0  | 2  | 4  | 2  | 7  | 5  | 4  | 4  | 0  | 7  | 0  | 2  | 8  | 5  | 3  | 7  | 5  |   |
| ENSP00000345352,ENSP00000345361,ENSP00000345393,ENSP00000345425,ENSP00000345456                 | ENSG00000100403   | ALDH3A2  | 243 | 10 | 6  | 6  | 9  | 12 | 10 | 11 | 11 | 7  | 5  | 6  | 6  | 7  | 7  | 5  | 8  | 12 | 8  | 10 | 7  | 6  | 7  | 8  | 7  | 16 | 17 | 6  | 6  | 4  | 3  |   |
| ENSP00000345352,ENSP00000345361,ENSP00000345393,ENSP00000345425,ENSP00000345456                 | ENSG00000136938   | ZC3H7B   | 34  | 1  | 1  | 1  | 2  | 1  | 1  | 3  | 0  | 0  | 0  | 0  | 0  | 1  | 1  | 0  | 1  | 3  | 1  | 4  | 4  | 1  | 0  | 0  | 1  | 2  | 0  | 0  | 2  | 0  | 3  |   |
| ENSP00000345352,ENSP00000345361,ENSP00000345393,ENSP00000345425,ENSP00000345456                 | ENSG00000189229   | ANP32B   | 546 | 20 | 18 | 18 | 15 | 35 | 18 | 19 | 11 | 13 | 6  | 18 | 10 | 16 | 10 | 15 | 16 | 24 | 17 | 22 | 27 | 21 | 13 | 18 | 14 | 30 | 19 | 15 | 22 | 29 | 17 |   |
| ENSP00000345352,ENSP00000345361,ENSP00000345393,ENSP00000345425,ENSP00000345456                 | ENSG0000010993000 | ACO69277 | 216 | 9  | 8  | 5  | 9  | 7  | 5  | 6  | 5  | 2  | 3  | 8  | 8  | 8  | 6  | 10 | 5  | 10 | 8  | 8  | 8  | 7  | 8  | 13 | 8  | 11 | 7  | 5  | 5  | 7  | 7  |   |
| ENSP00000345352,ENSP00000345361,ENSP00000345393,ENSP00000345425,ENSP00000345456                 | ENSG00000118705   | NUP50    | 64  | 2  | 1  | 2  | 1  | 1  | 1  | 1  | 1  | 0  | 1  | 2  | 4  | 1  | 2  | 3  | 1  | 3  | 3  | 2  | 4  | 1  | 7  | 2  | 1  | 2  | 2  | 1  | 4  | 2  | 1  |   |
| ENSP00000345352,ENSP00000345361,ENSP00000345393,ENSP00000345425,ENSP00000345456                 | ENSG00000145220   | RPN2     | 378 | 25 | 25 | 5  | 7  | 9  | 17 | 8  | 9  | 19 | 1  | 23 | 16 | 14 | 2  | 13 | 12 | 5  | 8  | 9  | 7  | 19 | 3  | 25 | 17 | 11 | 24 | 18 | 3  | 10 | 14 |   |
| ENSP00000345352,ENSP00000345361,ENSP00000345393,ENSP00000345425,ENSP00000345456                 | ENSG00000128595   | LYAR     | 270 | 12 | 6  | 4  | 5  | 4  | 6  | 9  | 6  | 8  | 5  | 13 | 6  | 9  | 2  | 6  | 7  |    |    |    |    |    |    |    |    |    |    |    |    |    |    |   |



|                                             |                  |           |      |     |     |     |    |     |     |    |    |    |    |     |    |    |     |     |    |    |    |    |     |    |    |     |     |     |     |     |    |    |    |   |
|---------------------------------------------|------------------|-----------|------|-----|-----|-----|----|-----|-----|----|----|----|----|-----|----|----|-----|-----|----|----|----|----|-----|----|----|-----|-----|-----|-----|-----|----|----|----|---|
| ENSP00000348838                             | ENSG00000175063  | UBE2C     | 36   | 4   | 3   | 4   | 1  | 1   | 1   | 1  | 0  | 1  | 0  | 0   | 0  | 1  | 1   | 2   | 2  | 1  | 0  | 1  | 1   | 3  | 1  | 0   | 1   | 0   | 1   | 1   | 0  | 2  | 1  | 1 |
| ENSP00000348847,ENSP000000:ENSG000000049759 | ENSG00000165283  | NEDD4L    | 72   | 6   | 1   | 5   | 2  | 1   | 3   | 1  | 1  | 0  | 4  | 0   | 0  | 2  | 3   | 5   | 0  | 3  | 2  | 5  | 1   | 6  | 3  | 0   | 0   | 3   | 5   | 2   | 6  | 1  | 1  |   |
| ENSP00000348849,ENSP000000:ENSG00000196656  | ENSG00000196656  | AC004057  | 93   | 5   | 2   | 2   | 0  | 3   | 5   | 2  | 2  | 4  | 2  | 4   | 2  | 4  | 3   | 3   | 4  | 5  | 2  | 5  | 3   | 1  | 4  | 2   | 2   | 3   | 3   | 3   | 5  | 5  |    |   |
| ENSP00000348877                             | ENSG00000105220  | GPI       | 529  | 17  | 18  | 13  | 11 | 17  | 16  | 15 | 10 | 23 | 5  | 16  | 7  | 15 | 11  | 20  | 11 | 18 | 20 | 19 | 25  | 18 | 12 | 11  | 12  | 32  | 24  | 31  | 28 | 29 | 25 |   |
| ENSP00000348878,ENSP000000:ENSG00000006282  | ENSG00000006282  | SPATA20   | 19   | 1   | 2   | 0   | 0  | 0   | 1   | 1  | 0  | 1  | 0  | 1   | 1  | 1  | 0   | 1   | 0  | 0  | 1  | 0  | 0   | 1  | 0  | 0   | 0   | 3   | 1   | 1   | 2  | 0  | 0  |   |
| ENSP00000348886                             | ENSG00000165283  | STOML2    | 369  | 21  | 12  | 11  | 8  | 9   | 7   | 5  | 11 | 9  | 20 | 18  | 7  | 3  | 10  | 7   | 13 | 12 | 13 | 15 | 10  | 14 | 15 | 17  | 11  | 16  | 11  | 15  | 26 | 16 |    |   |
| ENSP00000348888                             | ENSG00000162896  | PIGR      | 152  | 0   | 1   | 0   | 0  | 0   | 0   | 1  | 0  | 0  | 0  | 0   | 0  | 0  | 0   | 0   | 0  | 0  | 0  | 0  | 0   | 0  | 0  | 0   | 52  | 63  | 35  | 0   | 0  | 0  |    |   |
| ENSP00000348889                             | ENSG00000197043  | ANXA6     | 393  | 32  | 27  | 31  | 9  | 17  | 17  | 4  | 2  | 2  | 10 | 33  | 19 | 7  | 9   | 13  | 22 | 13 | 13 | 13 | 11  | 0  | 3  | 0   | 0   | 0   | 0   | 21  | 28 | 24 |    |   |
| ENSP00000348933                             | ENSG00000147419  | CCDC25    | 35   | 3   | 1   | 0   | 3  | 2   | 1   | 1  | 0  | 0  | 0  | 1   | 1  | 1  | 0   | 1   | 2  | 2  | 1  | 1  | 1   | 1  | 0  | 1   | 1   | 0   | 2   | 3   | 0  | 2  | 3  |   |
| ENSP00000348936                             | ENSG00000197980  | RP11-6F2. | 10   | 1   | 0   | 0   | 0  | 1   | 0   | 2  | 0  | 0  | 1  | 1   | 0  | 0  | 0   | 0   | 1  | 2  | 0  | 0  | 0   | 0  | 1  | 0   | 0   | 0   | 0   | 0   | 0  | 0  | 0  |   |
| ENSP00000348959,ENSP000000:ENSG00000198162  | ENSG00000198162  | MAN1A2    | 15   | 0   | 1   | 0   | 2  | 0   | 0   | 0  | 1  | 1  | 0  | 0   | 0  | 1  | 0   | 2   | 1  | 0  | 1  | 0  | 0   | 1  | 0  | 1   | 2   | 0   | 1   | 0   | 0  | 0  | 0  |   |
| ENSP00000348965                             | ENSG00000197102  | DYNC1H1   | 1805 | 79  | 60  | 58  | 43 | 33  | 42  | 50 | 41 | 45 | 16 | 75  | 37 | 57 | 38  | 78  | 52 | 68 | 70 | 68 | 88  | 94 | 36 | 79  | 42  | 67  | 93  | 50  | 71 | 96 | 79 |   |
| ENSP00000348984,ENSP000000:ENSG00000159140  | ENSG00000159140  | SON       | 294  | 7   | 6   | 7   | 7  | 10  | 5   | 7  | 11 | 6  | 10 | 20  | 12 | 9  | 10  | 14  | 6  | 9  | 10 | 10 | 18  | 9  | 13 | 12  | 10  | 6   | 4   | 7   | 10 | 19 | 10 |   |
| ENSP00000349016                             | ENSG00000142655  | PEX14     | 10   | 0   | 0   | 0   | 0  | 0   | 0   | 1  | 2  | 0  | 1  | 0   | 0  | 0  | 0   | 0   | 0  | 0  | 1  | 0  | 1   | 0  | 1  | 0   | 1   | 0   | 1   | 1   | 0  | 0  | 0  |   |
| ENSP00000349029,ENSP000000:ENSG00000150995  | ENSG00000150995  | ITPR1     | 18   | 0   | 2   | 0   | 1  | 1   | 0   | 2  | 0  | 1  | 0  | 2   | 0  | 1  | 0   | 0   | 1  | 0  | 1  | 1  | 2   | 0  | 1  | 0   | 1   | 0   | 0   | 0   | 0  | 0  | 1  | 0 |
| ENSP00000349049,ENSP000000:ENSG00000004487  | ENSG00000004487  | KDM1A     | 88   | 7   | 4   | 4   | 2  | 2   | 0   | 1  | 3  | 3  | 2  | 4   | 3  | 4  | 1   | 2   | 2  | 3  | 2  | 5  | 7   | 4  | 2  | 3   | 1   | 1   | 6   | 3   | 4  | 1  | 2  |   |
| ENSP00000349053                             | ENSG00000008959  | GANAB     | 998  | 53  | 33  | 37  | 25 | 41  | 23  | 39 | 28 | 42 | 16 | 32  | 30 | 28 | 26  | 32  | 28 | 39 | 29 | 39 | 50  | 38 | 37 | 50  | 27  | 28  | 39  | 25  | 28 | 27 | 29 |   |
| ENSP00000349056,ENSP000000:ENSG00000196914  | ENSG00000196914  | ARHGEF1   | 38   | 4   | 0   | 1   | 1  | 2   | 0   | 3  | 2  | 2  | 0  | 0   | 0  | 0  | 5   | 0   | 0  | 3  | 0  | 3  | 5   | 2  | 0  | 1   | 1   | 0   | 0   | 1   | 0  | 1  | 1  |   |
| ENSP00000349078,ENSP000000:ENSG00000160752  | ENSG00000160752  | FDPS      | 262  | 16  | 8   | 6   | 13 | 13  | 10  | 7  | 2  | 7  | 3  | 7   | 6  | 5  | 10  | 7   | 4  | 6  | 7  | 13 | 9   | 11 | 5  | 6   | 4   | 20  | 21  | 16  | 7  | 6  | 7  |   |
| ENSP00000349096                             | ENSG00000198001  | IRAK4     | 11   | 0   | 0   | 0   | 2  | 1   | 0   | 1  | 0  | 1  | 0  | 0   | 0  | 1  | 1   | 0   | 0  | 0  | 2  | 0  | 0   | 0  | 0  | 0   | 0   | 0   | 0   | 0   | 0  | 0  | 1  |   |
| ENSP00000349101                             | ENSG00000122566  | HNRNPA2   | 1692 | 57  | 48  | 35  | 60 | 56  | 46  | 79 | 42 | 52 | 38 | 92  | 58 | 37 | 23  | 50  | 47 | 83 | 53 | 73 | 58  | 51 | 53 | 83  | 68  | 60  | 67  | 51  | 52 | 71 | 49 |   |
| ENSP00000349148,ENSP000000:ENSG00000106268  | ENSG00000106268  | NUDT1     | 36   | 3   | 2   | 1   | 0  | 2   | 1   | 0  | 2  | 0  | 1  | 1   | 0  | 0  | 0   | 1   | 1  | 1  | 1  | 2  | 1   | 1  | 3  | 1   | 0   | 2   | 3   | 1   | 2  | 2  | 0  |   |
| ENSP00000349168,ENSP000000:ENSG00000169045  | ENSG00000169045  | HNRNPH1   | 749  | 31  | 21  | 21  | 13 | 25  | 19  | 15 | 14 | 22 | 17 | 53  | 21 | 29 | 17  | 27  | 21 | 22 | 25 | 23 | 23  | 29 | 20 | 46  | 35  | 32  | 30  | 15  | 24 | 40 | 19 |   |
| ENSP00000349205                             | ENSG00000196455  | PIK3R4    | 39   | 4   | 0   | 0   | 3  | 2   | 2   | 3  | 0  | 0  | 0  | 1   | 2  | 5  | 0   | 0   | 1  | 0  | 2  | 3  | 4   | 2  | 0  | 0   | 0   | 1   | 1   | 2   | 0  | 1  | 0  |   |
| ENSP00000349212                             | ENSG00000196531  | NACA      | 411  | 21  | 11  | 17  | 15 | 15  | 9   | 14 | 7  | 10 | 8  | 12  | 7  | 13 | 14  | 14  | 19 | 22 | 16 | 16 | 13  | 13 | 11 | 12  | 7   | 13  | 25  | 10  | 13 | 18 | 16 |   |
| ENSP00000349259,ENSP000000:ENSG00000115306  | ENSG00000115306  | SPTBN1    | 3054 | 174 | 121 | 136 | 89 | 125 | 103 | 86 | 71 | 73 | 74 | 129 | 83 | 95 | 110 | 138 | 33 | 53 | 49 | 86 | 120 | 87 | 98 | 122 | 100 | 201 | 223 | 124 | 54 | 43 | 54 |   |
| ENSP00000349297,ENSP000000:ENSG00000072778  | ENSG00000072778  | ACADVL    | 416  | 8   | 3   | 4   | 10 | 20  | 18  | 16 | 12 | 16 | 6  | 39  | 18 | 6  | 2   | 7   | 14 | 11 | 13 | 9  | 10  | 10 | 10 | 25  | 14  | 17  | 44  | 19  | 10 | 17 | 8  |   |
| ENSP00000349305                             | ENSG00000144674  | GOLGA4    | 211  | 18  | 7   | 15  | 4  | 3   | 3   | 4  | 5  | 7  | 3  | 4   | 6  | 7  | 6   | 13  | 8  | 12 | 9  | 10 | 13  | 7  | 2  | 4   | 4   | 8   | 12  | 2   | 6  | 2  | 7  |   |
| ENSP00000349321                             | ENSG00000105576  | TNPO2     | 103  | 7   | 4   | 3   | 3  | 3   | 2   | 1  | 1  | 0  | 1  | 0   | 4  | 3  | 3   | 3   | 2  | 5  | 6  | 5  | 6   | 3  | 3  | 2   | 2   | 1   | 6   | 4   | 5  | 8  | 4  |   |
| ENSP00000349351                             | ENSG00000185963  | BICD2     | 16   | 0   | 0   | 0   | 0  | 0   | 0   | 0  | 0  | 1  | 0  | 1   | 0  | 0  | 0   | 0   | 0  | 2  | 0  | 1  | 1   | 1  | 1  | 1   | 0   | 0   | 0   | 0   | 4  | 0  | 4  |   |
| ENSP00000349358                             | ENSG00000133641  | C12orf29  | 43   | 2   | 1   | 1   | 2  | 1   | 1   | 1  | 1  | 0  | 2  | 0   | 1  | 2  | 2   | 2   | 3  | 2  | 3  | 2  | 3   | 1  | 2  | 2   | 0   | 3   | 1   | 0   | 1  | 0  | 1  |   |
| ENSP00000349386                             | ENSG00000075151  | E1F4G3    | 25   | 1   | 1   | 0   | 2  | 1   | 0   | 1  | 0  | 1  | 0  | 0   | 0  | 1  | 0   | 1   | 0  | 2  | 1  | 1  | 4   | 3  | 0  | 1   | 0   | 2   | 0   | 0   | 0  | 0  | 2  |   |
| ENSP00000349415                             | ENSG000000099246 | RAB18     | 86   | 7   | 9   | 3   | 2  | 2   | 2   | 1  | 2  | 2  | 1  | 2   | 2  | 4  | 1   | 3   | 2  | 2  | 3  | 2  | 4   | 3  | 3  | 3   | 3   | 3   | 3   | 2   | 3  | 4  | 3  |   |
| ENSP00000349428,ENSP000000:ENSG000000011304 | ENSG000000011304 | PTBP1     | 150  | 3   | 7   | 3   | 0  | 3   | 6   | 4  | 0  | 7  | 1  | 3   | 6  | 2  | 4   | 5   | 5  | 1  | 6  | 2  | 4   | 10 | 6  | 8   | 15  | 4   | 5   | 6   | 6  | 7  | 11 |   |
| ENSP00000349436,ENSP000000:ENSG00000143537  | ENSG00000143537  | ADAM15    | 14   | 1   | 0   | 0   | 0  | 0   | 0   | 1  | 1  | 1  | 0  | 0   | 0  | 1  | 0   | 2   | 0  | 1  | 2  | 1  | 0   | 1  | 0  | 0   | 0   | 1   | 0   | 0   | 0  | 0  | 1  |   |
| ENSP00000349486                             | ENSG00000180900  | SCRIB     | 246  | 12  | 5   | 4   | 7  | 4   | 7   | 6  | 6  | 6  | 3  | 9   | 8  | 7  | 3   | 8   | 8  | 3  | 7  | 7  | 11  | 8  | 7  | 13  | 6   | 12  | 14  | 10  | 17 | 14 | 14 |   |
| ENSP00000349541,ENSP000000:ENSG00000177469  | ENSG00000177469  | PTRF      | 97   | 2   | 1   | 0   | 0  | 0   | 0   | 0  | 0  | 1  | 0  | 4   | 1  | 3  | 3   | 3   | 8  | 15 | 7  | 2  | 2   | 2  | 11 | 16  | 9   | 0   | 0   | 0   | 3  | 2  | 2  |   |
| ENSP00000349560                             | ENSG00000167578  | RAB4B     | 14   | 1   | 1   | 0   | 0  | 1   | 0   | 1  | 1  | 2  | 0  | 1   | 0  | 0  | 0   | 0   | 0  | 0  | 0  | 1  | 0   | 0  | 0  | 1   | 0   | 2   | 1   | 0   | 0  | 0  | 0  |   |
| ENSP00000349576,ENSP000000:ENSG00000129187  | ENSG00000129187  | DCTD      | 29   | 2   | 1   | 0   | 3  | 2   | 0   | 1  | 0  | 1  | 0  | 1   | 1  | 2  | 0   | 1   | 1  | 1  | 1  | 0  | 1   | 0  | 0  | 1   | 2   | 0   | 1   | 1   | 1  | 2  | 2  |   |
| ENSP00000349629                             | ENSG00000198589  | LRBA      | 253  | 6   | 7   | 9   | 17 | 18  | 20  | 14 | 7  | 10 | 1  | 3   | 1  | 5  | 1   | 10  | 7  | 18 | 14 | 30 | 0   | 1  | 1  | 7   | 5   | 13  | 14  | 13  | 5  | 12 | 11 |   |
| ENSP00000349630,ENSP000000:ENSG000000049130 | ENSG000000049130 | KITLG     | 10   | 1   | 2   | 0   | 0  | 0   | 0   | 0  | 0  | 0  | 0  | 1   | 0  | 0  | 0   | 0   | 0  | 1  | 1  | 1  | 1   | 0  | 0  | 0   | 0   | 0   | 1   | 0   | 1  | 0  | 0  |   |
| ENSP00000349658                             | ENSG00000196236  | YXNPEP3   | 67   | 3   | 1   | 2   | 0  | 2   | 2   | 0  | 1  | 2  | 1  | 1   | 1  | 4  | 1   | 4   | 4  | 1  | 3  | 4  | 2   | 6  | 0  | 1   | 2   | 1   | 5   | 2   | 3  | 3  | 5  |   |
| ENSP00000349679,ENSP000000:ENSG00000168589  | ENSG00000168589  | DXNLRB2   | 68   | 5   | 3   | 3   | 2  | 4   | 1   | 2  | 2  | 2  | 1  | 3   | 1  | 3  | 1   | 2   | 2  | 2  | 1  | 2  | 4   | 2  | 2  | 3   | 1   | 3   | 2   | 1   | 2  | 4  | 2  |   |
| ENSP00000349685,ENSP000000:ENSG00000132549  | ENSG00000132549  | VPS13B    | 40   | 1   | 2   | 1   | 1  | 0   | 1   | 2  | 2  | 1  | 1  | 0   | 0  | 4  | 0   | 2   | 0  | 3  | 0  | 3  | 1   | 3  | 0  | 2   | 0   | 2   | 1   | 0   | 3  | 2  | 2  |   |
| ENSP00000349705,ENSP000000:ENSG00000100038  | ENSG00000100038  | TOP3B     | 28   | 1   | 0   | 0   | 2  | 2   | 1   | 0  | 0  | 0  | 1  | 0   | 0  | 2  | 0   | 1   | 2  | 1  | 3  | 2  | 1   | 1  | 1  | 1   | 0   | 2   | 2   | 0   | 1  | 0  | 1  |   |
| ENSP00000349748                             | ENSG00000116560  | SFPQ      | 858  | 38  | 21  | 18  | 20 | 26  | 25  | 21 | 20 | 24 | 20 | 41  | 30 | 18 | 23  | 28  | 23 | 27 | 36 | 23 | 36  | 29 | 38 | 51  | 32  | 37  | 34  | 27  | 30 | 37 | 25 |   |
| ENSP00000349767,ENSP000000:ENSG00000182473  | ENSG00000182473  | EXOC7     | 79   | 3   | 4   | 1   | 6  | 2   | 2   | 3  | 0  | 2  | 2  | 0   | 0  | 5  | 2   | 2   | 6  | 1  | 2  | 6  | 3   | 1  | 2  | 2   | 1   | 8   | 5   | 1   | 1  | 2  | 4  |   |
| ENSP00000349823,ENSP000000:ENSG00000138375  | ENSG00000138375  | SMARCAL   | 11   | 1   | 0   | 1   | 0  | 1   | 0   | 0  | 0  | 0  | 0  | 0   | 0  | 0  | 0   | 0   | 1  | 1  | 1  | 1  | 0   | 0  | 0  | 0   | 0   | 0   | 2   | 1   | 0  | 0  | 0  |   |
| ENSP00000349856                             | ENSG00000130723  | BAT2L     | 10   | 2   | 0   | 0   | 1  | 0   | 0   | 0  |    |    |    |     |    |    |     |     |    |    |    |    |     |    |    |     |     |     |     |     |    |    |    |   |



[illegible]



|                                            |                  |      |    |    |    |    |    |    |    |    |    |    |    |    |    |    |    |    |    |    |    |    |    |    |    |    |    |    |    |    |    |    |
|--------------------------------------------|------------------|------|----|----|----|----|----|----|----|----|----|----|----|----|----|----|----|----|----|----|----|----|----|----|----|----|----|----|----|----|----|----|
| ENSP00000355783,ENSP000000:ENSG00000143751 | C1orf55          | 24   | 0  | 1  | 0  | 0  | 1  | 0  | 0  | 0  | 0  | 1  | 0  | 1  | 1  | 0  | 0  | 0  | 0  | 4  | 1  | 0  | 4  | 2  | 0  | 0  | 2  | 0  | 2  | 2  | 2  |    |
| ENSP00000355812                            | ENSG00000213066  | 21   | 3  | 1  | 1  | 2  | 0  | 1  | 0  | 0  | 1  | 0  | 1  | 0  | 1  | 0  | 0  | 0  | 1  | 2  | 2  | 1  | 1  | 0  | 0  | 2  | 1  | 0  | 0  | 0  |    |    |
| ENSP00000355831,ENSP000000:ENSG00000071242 | RFGR10P          | 109  | 7  | 3  | 3  | 4  | 3  | 6  | 4  | 3  | 3  | 4  | 2  | 6  | 3  | 3  | 3  | 2  | 5  | 3  | 6  | 1  | 3  | 1  | 5  | 7  | 6  | 4  | 4  | 2  |    |    |
| ENSP00000355834,ENSP000000:ENSG00000162909 | RPS6KA2          | 266  | 8  | 5  | 5  | 8  | 11 | 8  | 7  | 5  | 8  | 4  | 11 | 6  | 11 | 4  | 6  | 19 | 9  | 11 | 7  | 6  | 11 | 2  | 12 | 5  | 5  | 3  | 5  | 11 | 31 | 22 |
| ENSP00000355885                            | ENSG00000116141  | 27   | 1  | 2  | 0  | 0  | 0  | 1  | 1  | 1  | 2  | 0  | 0  | 0  | 0  | 0  | 3  | 1  | 1  | 0  | 0  | 1  | 2  | 1  | 0  | 0  | 2  | 1  | 1  | 2  | 2  | 2  |
| ENSP00000355890                            | ENSG00000136628  | 854  | 40 | 22 | 25 | 25 | 33 | 32 | 31 | 16 | 21 | 6  | 22 | 9  | 20 | 36 | 29 | 25 | 40 | 27 | 30 | 31 | 21 | 24 | 33 | 21 | 43 | 61 | 27 | 36 | 42 | 26 |
| ENSP00000355894,ENSP000000:ENSG00000143353 | LYPLAL1          | 13   | 1  | 1  | 0  | 0  | 1  | 0  | 1  | 0  | 1  | 0  | 0  | 0  | 0  | 0  | 0  | 0  | 1  | 1  | 1  | 1  | 0  | 0  | 0  | 1  | 1  | 2  | 0  | 0  | 0  |    |
| ENSP00000355899                            | ENSG00000067533  | 67   | 5  | 2  | 3  | 2  | 2  | 2  | 1  | 3  | 0  | 1  | 1  | 2  | 2  | 3  | 3  | 2  | 1  | 2  | 3  | 3  | 2  | 3  | 3  | 3  | 1  | 2  | 2  | 2  | 4  |    |
| ENSP00000355922                            | ENSG00000117724  | 85   | 5  | 2  | 4  | 6  | 1  | 3  | 2  | 1  | 3  | 4  | 2  | 7  | 2  | 4  | 5  | 1  | 1  | 0  | 4  | 7  | 1  | 4  | 0  | 1  | 1  | 0  | 0  | 5  | 4  | 5  |
| ENSP00000355923                            | ENSG00000152104  | 12   | 2  | 1  | 0  | 0  | 0  | 0  | 1  | 1  | 0  | 0  | 2  | 0  | 1  | 0  | 0  | 1  | 0  | 0  | 0  | 0  | 1  | 0  | 0  | 0  | 1  | 0  | 0  | 0  | 1  |    |
| ENSP00000355924                            | ENSG00000143499  | 16   | 3  | 2  | 1  | 1  | 2  | 1  | 0  | 0  | 0  | 0  | 0  | 0  | 0  | 2  | 1  | 0  | 0  | 0  | 2  | 0  | 0  | 0  | 0  | 0  | 0  | 1  | 0  | 0  | 0  | 0  |
| ENSP00000355955                            | ENSG00000117691  | 179  | 8  | 5  | 15 | 4  | 6  | 3  | 2  | 2  | 2  | 7  | 6  | 6  | 8  | 11 | 6  | 5  | 10 | 6  | 4  | 6  | 5  | 8  | 6  | 3  | 8  | 5  | 3  | 9  | 5  | 5  |
| ENSP00000355959                            | ENSG00000143493  | 55   | 0  | 0  | 0  | 3  | 2  | 1  | 3  | 2  | 2  | 1  | 2  | 3  | 2  | 1  | 1  | 3  | 3  | 4  | 3  | 4  | 1  | 2  | 4  | 2  | 1  | 0  | 1  | 1  | 0  | 3  |
| ENSP00000355968                            | ENSG00000170385  | 36   | 1  | 0  | 2  | 1  | 1  | 2  | 3  | 2  | 0  | 1  | 0  | 0  | 1  | 1  | 1  | 1  | 1  | 1  | 1  | 2  | 0  | 3  | 3  | 2  | 1  | 3  | 2  | 0  | 0  | 0  |
| ENSP00000355972                            | ENSG00000117625  | 54   | 2  | 1  | 3  | 3  | 2  | 3  | 5  | 1  | 1  | 2  | 1  | 3  | 2  | 3  | 1  | 3  | 2  | 1  | 4  | 3  | 1  | 1  | 1  | 0  | 2  | 1  | 0  | 1  | 0  | 1  |
| ENSP00000355973                            | ENSG00000117625  | 47   | 2  | 1  | 2  | 2  | 2  | 3  | 4  | 1  | 1  | 2  | 1  | 2  | 1  | 3  | 1  | 1  | 2  | 1  | 4  | 2  | 1  | 1  | 1  | 0  | 2  | 1  | 0  | 1  | 1  | 1  |
| ENSP00000355987                            | ENSG00000117597  | 52   | 2  | 1  | 2  | 0  | 0  | 0  | 3  | 2  | 1  | 2  | 3  | 2  | 0  | 0  | 1  | 0  | 2  | 3  | 2  | 1  | 0  | 2  | 2  | 4  | 2  | 1  | 2  | 4  | 6  | 2  |
| ENSP00000356001                            | ENSG00000112110  | 17   | 1  | 1  | 0  | 0  | 1  | 1  | 0  | 1  | 1  | 0  | 0  | 0  | 0  | 0  | 2  | 0  | 1  | 1  | 0  | 0  | 1  | 0  | 1  | 1  | 1  | 1  | 1  | 0  | 0  | 1  |
| ENSP00000356015                            | ENSG00000120437  | 38   | 5  | 3  | 2  | 0  | 2  | 1  | 1  | 0  | 2  | 0  | 0  | 0  | 0  | 0  | 1  | 0  | 2  | 2  | 3  | 2  | 2  | 0  | 0  | 1  | 0  | 4  | 1  | 0  | 3  | 1  |
| ENSP00000356022,ENSP000000:ENSG00000112096 | SOD2             | 27   | 0  | 1  | 0  | 0  | 1  | 0  | 2  | 0  | 0  | 0  | 0  | 0  | 0  | 1  | 0  | 2  | 0  | 0  | 1  | 0  | 1  | 1  | 4  | 3  | 1  | 4  | 2  | 0  | 2  | 1  |
| ENSP00000356034,ENSP000000:ENSG00000196352 | CD55             | 75   | 2  | 2  | 1  | 0  | 0  | 0  | 0  | 0  | 3  | 0  | 0  | 0  | 0  | 2  | 2  | 0  | 3  | 1  | 1  | 2  | 2  | 19 | 21 | 12 | 0  | 0  | 1  | 1  | 0  | 0  |
| ENSP00000356047                            | ENSG00000123836  | 146  | 8  | 4  | 4  | 16 | 21 | 12 | 4  | 1  | 1  | 0  | 1  | 0  | 5  | 1  | 2  | 5  | 5  | 2  | 7  | 2  | 3  | 1  | 6  | 2  | 10 | 12 | 6  | 2  | 2  | 1  |
| ENSP00000356067                            | ENSG00000185068  | 10   | 0  | 0  | 0  | 1  | 0  | 0  | 0  | 0  | 0  | 1  | 1  | 1  | 1  | 0  | 0  | 0  | 0  | 0  | 0  | 0  | 0  | 1  | 0  | 0  | 0  | 0  | 0  | 1  | 1  | 1  |
| ENSP00000356070                            | ENSG00000162889  | 44   | 3  | 2  | 1  | 2  | 2  | 0  | 2  | 1  | 0  | 0  | 0  | 2  | 2  | 2  | 2  | 1  | 2  | 2  | 3  | 2  | 2  | 0  | 1  | 0  | 1  | 1  | 1  | 3  | 1  | 3  |
| ENSP00000356110,ENSP000000:ENSG00000069275 | NUCKS1           | 43   | 2  | 3  | 0  | 0  | 2  | 2  | 0  | 3  | 3  | 0  | 1  | 0  | 0  | 2  | 3  | 0  | 4  | 2  | 0  | 2  | 1  | 0  | 0  | 2  | 1  | 5  | 2  | 0  | 3  | 0  |
| ENSP00000356134                            | ENSG00000029639  | 21   | 1  | 1  | 0  | 0  | 1  | 0  | 1  | 0  | 0  | 1  | 2  | 1  | 1  | 0  | 1  | 2  | 0  | 1  | 0  | 0  | 0  | 1  | 1  | 0  | 0  | 0  | 0  | 2  | 3  | 0  |
| ENSP00000356146,ENSP000000:ENSG00000213079 | RBM16            | 36   | 0  | 2  | 1  | 0  | 0  | 1  | 3  | 1  | 2  | 2  | 0  | 0  | 1  | 1  | 1  | 2  | 1  | 2  | 3  | 2  | 2  | 2  | 0  | 0  | 0  | 0  | 1  | 3  | 1  | 2  |
| ENSP00000356155                            | ENSG00000133056  | 11   | 0  | 2  | 0  | 0  | 0  | 1  | 0  | 0  | 0  | 0  | 1  | 0  | 0  | 0  | 0  | 0  | 1  | 0  | 1  | 0  | 0  | 0  | 0  | 0  | 0  | 2  | 2  | 1  | 0  | 0  |
| ENSP00000356159,ENSP000000:ENSG00000143850 | PLEKHA2B         | 52   | 0  | 2  | 0  | 3  | 4  | 0  | 2  | 4  | 7  | 1  | 1  | 1  | 0  | 0  | 0  | 1  | 0  | 0  | 0  | 1  | 1  | 2  | 3  | 2  | 6  | 6  | 5  | 0  | 0  | 0  |
| ENSP00000356177                            | ENSG00000182004  | 114  | 4  | 3  | 4  | 2  | 5  | 3  | 4  | 2  | 3  | 3  | 5  | 3  | 5  | 3  | 4  | 5  | 4  | 4  | 3  | 5  | 3  | 3  | 5  | 3  | 6  | 3  | 3  | 6  | 4  | 4  |
| ENSP00000356183,ENSP000000:ENSG00000058673 | ZC3H11A          | 122  | 6  | 2  | 4  | 4  | 3  | 2  | 7  | 8  | 2  | 4  | 1  | 2  | 3  | 5  | 6  | 3  | 2  | 2  | 8  | 8  | 6  | 5  | 5  | 5  | 5  | 3  | 1  | 3  | 5  | 2  |
| ENSP00000356188,ENSP000000:ENSG00000058668 | ATP2B4           | 184  | 4  | 6  | 2  | 2  | 2  | 0  | 5  | 5  | 9  | 0  | 2  | 3  | 6  | 2  | 7  | 9  | 20 | 10 | 10 | 3  | 9  | 5  | 17 | 11 | 9  | 12 | 6  | 1  | 3  | 4  |
| ENSP00000356218                            | ENSG00000159348  | 63   | 3  | 1  | 2  | 3  | 4  | 2  | 2  | 3  | 3  | 0  | 4  | 2  | 1  | 1  | 1  | 2  | 2  | 1  | 1  | 3  | 1  | 1  | 3  | 1  | 2  | 5  | 1  | 2  | 3  | 3  |
| ENSP00000356224,ENSP000000:ENSG00000131018 | SYNE1            | 27   | 2  | 1  | 0  | 3  | 1  | 0  | 0  | 0  | 1  | 0  | 2  | 0  | 2  | 0  | 1  | 0  | 1  | 1  | 3  | 0  | 1  | 0  | 2  | 0  | 1  | 2  | 1  | 1  | 1  | 0  |
| ENSP00000356243                            | ENSG00000077152  | 16   | 3  | 1  | 0  | 1  | 0  | 0  | 1  | 0  | 1  | 0  | 0  | 0  | 1  | 0  | 0  | 0  | 0  | 1  | 1  | 2  | 1  | 0  | 1  | 0  | 0  | 1  | 0  | 0  | 0  | 1  |
| ENSP00000356263                            | ENSG00000146476  | 31   | 2  | 1  | 0  | 0  | 1  | 0  | 1  | 2  | 0  | 0  | 0  | 0  | 2  | 0  | 1  | 2  | 0  | 2  | 1  | 5  | 1  | 0  | 1  | 0  | 3  | 2  | 0  | 1  | 1  | 2  |
| ENSP00000356271,ENSP000000:ENSG00000134369 | NAV1             | 10   | 0  | 0  | 1  | 1  | 1  | 0  | 1  | 0  | 1  | 0  | 0  | 0  | 0  | 0  | 0  | 0  | 0  | 0  | 0  | 0  | 0  | 0  | 0  | 0  | 0  | 0  | 2  | 2  | 0  | 1  |
| ENSP00000356272                            | ENSG00000155906  | 45   | 1  | 2  | 1  | 0  | 0  | 0  | 1  | 0  | 0  | 1  | 1  | 1  | 2  | 1  | 1  | 1  | 2  | 1  | 4  | 2  | 1  | 2  | 0  | 1  | 4  | 2  | 2  | 6  | 3  | 2  |
| ENSP00000356275,ENSP000000:ENSG00000159176 | CSRP1            | 94   | 5  | 3  | 3  | 5  | 3  | 3  | 4  | 1  | 3  | 3  | 3  | 2  | 2  | 4  | 3  | 2  | 4  | 1  | 4  | 4  | 3  | 2  | 2  | 1  | 6  | 5  | 2  | 2  | 6  | 3  |
| ENSP00000356290                            | ENSG00000120254  | 463  | 10 | 5  | 14 | 9  | 16 | 13 | 8  | 14 | 6  | 13 | 15 | 13 | 14 | 16 | 16 | 18 | 20 | 21 | 10 | 25 | 17 | 19 | 23 | 18 | 21 | 14 | 12 | 24 | 23 | 16 |
| ENSP00000356319                            | ENSG00000118193  | 16   | 2  | 0  | 0  | 1  | 0  | 0  | 2  | 0  | 0  | 0  | 1  | 1  | 0  | 1  | 0  | 0  | 0  | 0  | 0  | 0  | 1  | 1  | 0  | 0  | 1  | 2  | 0  | 0  | 1  | 1  |
| ENSP00000356320                            | ENSG00000131015  | 16   | 0  | 0  | 1  | 1  | 0  | 0  | 0  | 0  | 0  | 1  | 0  | 0  | 0  | 0  | 0  | 1  | 1  | 1  | 0  | 0  | 1  | 2  | 3  | 2  | 0  | 0  | 0  | 1  | 1  | 0  |
| ENSP00000356354,ENSP000000:ENSG00000120265 | PCMT1            | 136  | 7  | 3  | 8  | 2  | 3  | 2  | 4  | 3  | 3  | 1  | 3  | 4  | 4  | 4  | 3  | 4  | 7  | 4  | 5  | 8  | 4  | 4  | 4  | 3  | 6  | 7  | 3  | 8  | 9  | 6  |
| ENSP00000356374                            | ENSG00000120253  | 31   | 5  | 2  | 2  | 1  | 0  | 1  | 1  | 0  | 0  | 0  | 3  | 0  | 2  | 0  | 0  | 3  | 0  | 1  | 1  | 0  | 2  | 0  | 3  | 0  | 0  | 4  | 0  | 0  | 0  | 0  |
| ENSP00000356379                            | ENSG00000066629  | 19   | 3  | 2  | 0  | 0  | 0  | 1  | 1  | 1  | 0  | 1  | 0  | 1  | 0  | 1  | 0  | 0  | 0  | 2  | 0  | 0  | 1  | 2  | 0  | 0  | 0  | 0  | 1  | 1  | 0  | 1  |
| ENSP00000356405                            | ENSG00000134371  | 109  | 8  | 4  | 4  | 2  | 4  | 3  | 4  | 4  | 3  | 2  | 4  | 5  | 0  | 2  | 0  | 4  | 5  | 3  | 5  | 4  | 1  | 3  | 7  | 3  | 4  | 4  | 3  | 5  | 3  | 6  |
| ENSP00000356416,ENSP000000:ENSG00000116747 | TROVE2           | 184  | 5  | 4  | 1  | 5  | 6  | 4  | 4  | 4  | 5  | 0  | 3  | 1  | 6  | 2  | 6  | 13 | 13 | 9  | 4  | 5  | 8  | 1  | 11 | 5  | 11 | 12 | 7  | 9  | 9  | 11 |
| ENSP00000356424,ENSP000000:ENSG00000116750 | UCHL5            | 183  | 7  | 5  | 3  | 7  | 5  | 6  | 7  | 4  | 8  | 2  | 2  | 4  | 4  | 5  | 5  | 5  | 10 | 9  | 9  | 11 | 6  | 3  | 6  | 3  | 10 | 6  | 5  | 9  | 8  | 9  |
| ENSP00000356436                            | ENSG00000116711  | 20   | 1  | 0  | 0  | 0  | 0  | 0  | 5  | 1  | 2  | 0  | 0  | 0  | 0  | 0  | 0  | 0  | 1  | 1  | 0  | 0  | 0  | 1  | 0  | 0  | 4  | 3  | 0  | 0  | 0  | 1  |
| ENSP00000356448                            | ENSG000000047410 | 1402 | 67 | 38 | 53 | 39 | 41 | 25 | 32 | 44 | 25 | 46 | 53 | 49 | 38 | 38 | 37 | 39 | 65 | 38 | 51 | 53 | 35 | 73 | 67 | 45 | 56 | 58 | 26 | 66 | 62 | 43 |
| ENSP00000356465                            | ENSG00000118508  | 48   | 1  | 1  | 0  | 1  | 1  | 1  | 3  | 0  | 0  | 0  | 2  | 2  | 1  | 0  | 1  | 1  | 2  | 1  | 0  | 0  | 1  | 3  | 3  | 3  | 7  | 5  | 5  | 0  | 2  | 1  |
| ENSP00000356476                            | ENSG00000121486  | 48   | 1  | 0  | 1  | 1  | 0  | 2  | 1  | 1  | 2  | 0  | 2  | 2  | 1  | 0  | 2  | 1  | 4  | 2  | 2  | 4  | 3  | 1  | 2  | 1  | 1  | 1  | 2  | 3  | 2  | 3  |
| ENSP00000356480                            | ENSG00000121481  | 50   | 2  | 1  | 1  | 1  | 1  | 1  | 2  | 1  | 4  | 2  | 2  | 2  | 1  | 1  | 2  | 1  | 1  | 1  | 1  | 1  | 1  | 2  | 2  | 3  | 1  | 2  | 1  | 4  | 1  | 4  |
| ENSP0                                      |                  |      |    |    |    |    |    |    |    |    |    |    |    |    |    |    |    |    |    |    |    |    |    |    |    |    |    |    |    |    |    |    |

|                            |                  |         |      |    |    |    |    |     |     |     |     |     |    |     |    |    |    |    |    |     |    |    |    |    |     |     |     |     |    |    |    |    |    |   |
|----------------------------|------------------|---------|------|----|----|----|----|-----|-----|-----|-----|-----|----|-----|----|----|----|----|----|-----|----|----|----|----|-----|-----|-----|-----|----|----|----|----|----|---|
| ENSP00000357177            | ENSG00000132694  | ARHGEF1 | 52   | 4  | 1  | 2  | 1  | 2   | 2   | 1   | 2   | 3   | 0  | 1   | 3  | 1  | 1  | 3  | 3  | 2   | 2  | 2  | 3  | 2  | 3   | 2   | 1   | 1   | 1  | 1  | 0  | 1  | 1  |   |
| ENSP00000357189,ENSP000003 | ENSG00000143321  | HDFGF   | 527  | 33 | 14 | 16 | 14 | 22  | 15  | 16  | 12  | 23  | 12 | 17  | 9  | 6  | 15 | 11 | 5  | 22  | 15 | 14 | 15 | 12 | 13  | 25  | 19  | 30  | 38 | 17 | 23 | 31 | 13 |   |
| ENSP00000357196,ENSP000003 | ENSG00000152894  | PTPRK   | 32   | 0  | 0  | 0  | 0  | 0   | 0   | 4   | 1   | 2   | 0  | 0   | 0  | 4  | 3  | 2  | 0  | 0   | 0  | 1  | 0  | 0  | 5   | 4   | 0   | 0   | 4  | 0  | 0  | 0  | 0  |   |
| ENSP00000357202,ENSP000003 | ENSG00000143319  | ISG20L2 | 126  | 1  | 2  | 0  | 2  | 0   | 1   | 0   | 0   | 1   | 0  | 1   | 1  | 0  | 0  | 1  | 0  | 0   | 1  | 1  | 0  | 0  | 1   | 1   | 3   | 1   | 1  | 2  | 1  | 2  | 1  |   |
| ENSP00000357205,ENSP000003 | ENSG00000143320  | CRABP2  | 112  | 5  | 3  | 3  | 0  | 0   | 0   | 18  | 13  | 12  | 1  | 4   | 6  | 0  | 0  | 0  | 6  | 5   | 8  | 3  | 2  | 3  | 0   | 0   | 0   | 0   | 0  | 0  | 0  | 7  | 7  | 6 |
| ENSP00000357206            | ENSG00000132688  | NES     | 160  | 30 | 7  | 13 | 0  | 0   | 0   | 0   | 0   | 0   | 25 | 46  | 38 | 0  | 0  | 0  | 0  | 0   | 0  | 0  | 0  | 0  | 0   | 0   | 1   | 0   | 0  | 0  | 0  | 0  | 0  |   |
| ENSP00000357212            | ENSG00000160818  | GPATCH4 | 103  | 4  | 1  | 4  | 2  | 1   | 0   | 4   | 2   | 1   | 3  | 2   | 3  | 5  | 7  | 4  | 3  | 7   | 2  | 5  | 6  | 2  | 4   | 4   | 4   | 5   | 2  | 2  | 6  | 3  | 5  |   |
| ENSP00000357218            | ENSG00000163382  | APOA1BP | 205  | 1  | 2  | 0  | 0  | 0   | 3   | 1   | 0   | 1   | 0  | 1   | 0  | 0  | 0  | 0  | 0  | 0   | 2  | 0  | 0  | 1  | 0   | 0   | 0   | 3   | 2  | 2  | 2  | 3  | 1  |   |
| ENSP00000357231            | ENSG00000172673  | THEMIS  | 12   | 1  | 0  | 0  | 0  | 0   | 0   | 0   | 0   | 0   | 1  | 0   | 1  | 0  | 0  | 0  | 0  | 0   | 0  | 1  | 0  | 0  | 1   | 0   | 1   | 1   | 1  | 0  | 1  | 1  |    |   |
| ENSP00000357244,ENSP000003 | ENSG00000163468  | CCT3    | 943  | 42 | 38 | 22 | 17 | 24  | 17  | 28  | 20  | 30  | 8  | 34  | 13 | 27 | 15 | 26 | 41 | 43  | 45 | 37 | 45 | 39 | 23  | 28  | 27  | 50  | 59 | 31 | 34 | 48 | 32 |   |
| ENSP00000357260,ENSP000003 | ENSG00000160783  | PMF1    | 13   | 0  | 0  | 1  | 1  | 1   | 0   | 0   | 0   | 2   | 0  | 0   | 0  | 0  | 1  | 1  | 1  | 0   | 0  | 0  | 1  | 0  | 0   | 0   | 1   | 0   | 1  | 0  | 0  | 2  | 0  |   |
| ENSP00000357278,ENSP000003 | ENSG000001009314 | ECHDC1  | 159  | 11 | 6  | 4  | 3  | 1   | 2   | 4   | 5   | 4   | 1  | 2   | 2  | 6  | 7  | 8  | 6  | 6   | 3  | 5  | 4  | 4  | 5   | 8   | 1   | 8   | 8  | 5  | 7  | 14 | 9  |   |
| ENSP00000357280,ENSP000003 | ENSG00000160789  | LMNA    | 1973 | 31 | 28 | 27 | 74 | 116 | 87  | 91  | 92  | 81  | 71 | 109 | 76 | 52 | 56 | 56 | 54 | 84  | 63 | 41 | 57 | 45 | 98  | 95  | 84  | 88  | 65 | 56 | 31 | 32 | 33 |   |
| ENSP00000357283            | ENSG00000160789  | LMNA    | 2551 | 42 | 37 | 41 | 92 | 152 | 106 | 118 | 125 | 102 | 99 | 134 | 98 | 64 | 75 | 69 | 63 | 106 | 83 | 56 | 79 | 59 | 125 | 124 | 102 | 106 | 89 | 74 | 44 | 45 | 42 |   |
| ENSP00000357288            | ENSG00000165686  | ROBLD3  | 59   | 1  | 1  | 1  | 3  | 2   | 2   | 4   | 0   | 0   | 4  | 0   | 4  | 3  | 3  | 0  | 2  | 2   | 2  | 1  | 2  | 1  | 2   | 1   | 2   | 5   | 1  | 2  | 3  | 1  | 2  |   |
| ENSP00000357292            | ENSG00000160803  | UBQLN4  | 67   | 3  | 2  | 1  | 2  | 1   | 1   | 3   | 0   | 2   | 1  | 2   | 2  | 1  | 0  | 3  | 3  | 1   | 3  | 1  | 3  | 4  | 1   | 2   | 2   | 2   | 5  | 3  | 3  | 5  | 5  |   |
| ENSP00000357315            | ENSG0000016580   | GON4L   | 15   | 0  | 0  | 0  | 1  | 1   | 0   | 0   | 0   | 0   |    |     |    |    |    |    |    |     |    |    |    |    |     |     |     |     |    |    |    |    |    |   |



|                                                                 |                 |          |     |    |    |    |    |    |    |    |    |    |    |    |    |    |    |    |    |    |    |    |    |    |    |    |    |    |    |    |    |    |    |   |
|-----------------------------------------------------------------|-----------------|----------|-----|----|----|----|----|----|----|----|----|----|----|----|----|----|----|----|----|----|----|----|----|----|----|----|----|----|----|----|----|----|----|---|
| ENSP00000359339                                                 | ENSG00000164430 | C6orf150 | 31  | 2  | 3  | 2  | 1  | 0  | 0  | 0  | 0  | 1  | 1  | 1  | 0  | 0  | 0  | 0  | 0  | 0  | 0  | 1  | 0  | 0  | 2  | 0  | 3  | 0  | 0  | 0  | 4  | 3  | 7  |   |
| ENSP00000359345                                                 | ENSG00000122406 | RPL5     | 614 | 30 | 17 | 19 | 18 | 19 | 18 | 22 | 5  | 14 | 7  | 15 | 18 | 22 | 18 | 22 | 14 | 21 | 25 | 26 | 27 | 22 | 11 | 23 | 14 | 25 | 39 | 26 | 23 | 34 | 20 |   |
| ENSP00000359356                                                 | ENSG00000067208 | EV15     | 32  | 0  | 1  | 3  | 1  | 1  | 1  | 1  | 2  | 0  | 1  | 0  | 1  | 2  | 2  | 0  | 0  | 3  | 0  | 1  | 5  | 1  | 1  | 1  | 0  | 2  | 0  | 1  | 1  | 0  | 0  |   |
| ENSP00000359358                                                 | ENSG00000149658 | YTHDF1   | 78  | 7  | 2  | 4  | 2  | 3  | 2  | 2  | 3  | 2  | 1  | 0  | 1  | 1  | 5  | 2  | 1  | 2  | 2  | 3  | 6  | 2  | 3  | 4  | 1  | 2  | 4  | 2  | 4  | 2  | 3  |   |
| ENSP00000359380                                                 | ENSG00000099194 | SCD      | 40  | 2  | 1  | 2  | 2  | 3  | 3  | 1  | 1  | 1  | 0  | 1  | 0  | 1  | 1  | 2  | 2  | 2  | 1  | 2  | 1  | 2  | 1  | 0  | 1  | 4  | 0  | 1  | 1  | 0  |    |   |
| ENSP00000359385                                                 | ENSG00000174842 | GLMN     | 52  | 2  | 1  | 0  | 2  | 1  | 0  | 1  | 0  | 1  | 0  | 1  | 1  | 2  | 3  | 6  | 1  | 4  | 4  | 3  | 2  | 0  | 3  | 1  | 1  | 4  | 3  | 1  | 0  | 2  |    |   |
| ENSP00000359393                                                 | ENSG00000029993 | HMGGB3   | 121 | 7  | 3  | 6  | 3  | 5  | 3  | 4  | 2  | 3  | 3  | 6  | 1  | 4  | 3  | 2  | 4  | 5  | 5  | 4  | 6  | 4  | 3  | 5  | 2  | 8  | 6  | 4  | 3  | 5  |    |   |
| ENSP00000359424                                                 | ENSG00000213341 | CHUK     | 12  | 0  | 1  | 0  | 0  | 0  | 0  | 0  | 0  | 1  | 1  | 0  | 0  | 0  | 0  | 0  | 0  | 0  | 0  | 1  | 0  | 0  | 3  | 0  | 0  | 1  | 0  | 0  | 1  | 0  | 3  |   |
| ENSP00000359433                                                 | ENSG00000203914 | HSP90B3F | 344 | 16 | 11 | 10 | 13 | 28 | 17 | 13 | 6  | 7  | 5  | 8  | 4  | 8  | 8  | 9  | 7  | 11 | 19 | 7  | 14 | 13 | 11 | 11 | 15 | 8  | 24 | 13 | 12 | 7  | 7  | 6 |
| ENSP00000359438,ENSP00000359478                                 | ENSG00000107566 | ERLIN1   | 217 | 8  | 5  | 7  | 5  | 7  | 5  | 5  | 6  | 3  | 9  | 5  | 4  | 5  | 12 | 8  | 7  | 9  | 8  | 6  | 9  | 6  | 13 | 10 | 6  | 8  | 12 | 6  | 9  | 10 | 4  |   |
| ENSP00000359478                                                 | ENSG00000023839 | ABCC2    | 17  | 3  | 2  | 0  | 5  | 2  | 2  | 0  | 0  | 0  | 0  | 0  | 0  | 0  | 0  | 0  | 0  | 0  | 0  | 0  | 0  | 1  | 0  | 0  | 0  | 1  | 0  | 0  | 0  | 0  | 1  |   |
| ENSP00000359491                                                 | ENSG00000060491 | OGFR     | 179 | 11 | 6  | 7  | 6  | 1  | 3  | 12 | 7  | 9  | 5  | 3  | 1  | 2  | 4  | 5  | 2  | 11 | 8  | 13 | 11 | 8  | 5  | 9  | 4  | 2  | 5  | 4  | 6  | 4  | 5  |   |
| ENSP00000359497                                                 | ENSG00000162645 | GBP2     | 15  | 0  | 0  | 0  | 3  | 0  | 5  | 2  | 0  | 0  | 0  | 0  | 0  | 0  | 0  | 0  | 0  | 0  | 0  | 0  | 0  | 0  | 0  | 2  | 0  | 1  | 1  | 1  | 0  | 0  | 0  |   |
| ENSP00000359503,ENSP00000359505                                 | ENSG00000119929 | CUTC     | 25  | 2  | 1  | 0  | 1  | 0  | 0  | 0  | 1  | 0  | 0  | 0  | 0  | 0  | 0  | 0  | 0  | 4  | 3  | 2  | 2  | 0  | 1  | 0  | 0  | 0  | 0  | 0  | 2  | 3  | 3  |   |
| ENSP00000359505                                                 | ENSG00000154079 | C6orf57  | 11  | 1  | 0  | 0  | 1  | 0  | 0  | 3  | 0  | 0  | 0  | 0  | 0  | 1  | 0  | 0  | 0  | 0  | 0  | 2  | 1  | 1  | 0  | 0  | 0  | 0  | 0  | 0  | 0  | 0  | 0  |   |
| ENSP00000359508,ENSP00000359518                                 | ENSG00000102081 | FMR1     | 108 | 5  | 2  | 4  | 3  | 1  | 2  | 6  | 4  | 5  | 3  | 5  | 4  | 4  | 4  | 3  | 2  | 5  | 3  | 3  | 4  | 1  | 4  | 5  | 6  | 3  | 2  | 4  | 4  | 1  | 6  |   |
| ENSP00000359518                                                 | ENSG00000101189 | C20orf20 | 17  | 2  | 1  | 0  | 0  | 0  | 1  | 0  | 0  | 1  | 0  | 2  | 0  | 1  | 1  | 0  | 2  | 1  | 1  | 1  | 0  | 0  | 0  | 0  | 1  | 1  | 0  | 1  | 0  | 0  | 1  |   |
| ENSP00000359522,ENSP00000359531                                 | ENSG00000137944 | CCBL2    | 58  | 2  | 1  | 1  | 1  | 1  | 1  | 2  | 1  | 3  | 0  | 1  | 0  | 1  | 0  | 2  | 2  | 4  | 2  | 4  | 9  | 6  | 1  | 1  | 0  | 2  | 3  | 1  | 4  | 1  | 1  |   |
| ENSP00000359531                                                 | ENSG00000137947 | GTF2B    | 151 | 2  | 1  | 0  | 7  | 4  | 4  | 8  | 3  | 0  | 0  | 0  | 1  | 8  | 3  | 7  | 6  | 15 | 10 | 6  | 6  | 7  | 3  | 11 | 5  | 6  | 6  | 5  | 7  | 5  | 5  |   |
| ENSP00000359539                                                 | ENSG00000120053 | GOT1     | 225 | 6  | 5  | 6  | 4  | 10 | 14 | 6  | 7  | 5  | 2  | 6  | 5  | 5  | 7  | 9  | 11 | 16 | 7  | 4  | 8  | 8  | 6  | 4  | 14 | 15 | 11 | 6  | 9  | 4  |    |   |
| ENSP00000359552                                                 | ENSG00000065243 | PKN2     | 116 | 1  | 0  | 3  | 0  | 2  | 1  | 5  | 4  | 3  | 1  | 1  | 1  | 6  | 2  | 3  | 6  | 4  | 7  | 9  | 6  | 8  | 3  | 3  | 0  | 9  | 8  | 6  | 1  | 5  | 8  |   |
| ENSP00000359581,ENSP00000359588                                 | ENSG00000153936 | HS2ST1   | 15  | 2  | 1  | 0  | 0  | 0  | 2  | 1  | 2  | 0  | 0  | 2  | 0  | 0  | 0  | 0  | 0  | 1  | 0  | 0  | 0  | 0  | 0  | 0  | 1  | 0  | 2  | 0  | 0  | 1  | 0  |   |
| ENSP00000359588                                                 | ENSG00000101974 | ATP11C   | 11  | 0  | 0  | 0  | 0  | 0  | 0  | 0  | 0  | 0  | 0  | 2  | 1  | 0  | 0  | 0  | 0  | 1  | 0  | 1  | 0  | 1  | 0  | 2  | 0  | 0  | 0  | 0  | 2  | 0  | 1  |   |
| ENSP00000359589                                                 | ENSG00000097033 | SH3GLB1  | 60  | 2  | 1  | 1  | 1  | 1  | 1  | 2  | 5  | 1  | 0  | 0  | 1  | 1  | 2  | 1  | 1  | 2  | 2  | 3  | 4  | 1  | 2  | 1  | 3  | 2  | 3  | 7  | 4  | 3  |    |   |
| ENSP00000359645                                                 | ENSG00000147274 | RBMX     | 349 | 11 | 9  | 5  | 15 | 14 | 7  | 18 | 14 | 8  | 17 | 16 | 15 | 6  | 11 | 8  | 4  | 17 | 11 | 15 | 13 | 12 | 21 | 7  | 10 | 15 | 9  | 9  | 11 | 12 | 9  |   |
| ENSP00000359657                                                 | ENSG00000129675 | ARHGFEF6 | 26  | 1  | 0  | 1  | 1  | 3  | 2  | 1  | 1  | 1  | 0  | 0  | 1  | 1  | 1  | 0  | 1  | 1  | 1  | 0  | 1  | 0  | 0  | 2  | 0  | 1  | 0  | 0  | 2  | 2  | 1  |   |
| ENSP00000359665                                                 | ENSG00000043822 |          | 13  | 0  | 1  | 0  | 1  | 0  | 0  | 1  | 0  | 0  | 1  | 1  | 1  | 0  | 0  | 0  | 2  | 0  | 0  | 0  | 0  | 0  | 1  | 0  | 0  | 0  | 0  | 0  | 0  | 1  | 3  |   |
| ENSP00000359685                                                 | ENSG00000112245 | PTP4A1   | 40  | 2  | 1  | 0  | 1  | 1  | 1  | 2  | 4  | 2  | 0  | 2  | 1  | 1  | 0  | 1  | 1  | 3  | 3  | 2  | 2  | 1  | 0  | 3  | 2  | 2  | 1  | 2  | 0  | 1  | 0  |   |
| ENSP00000359688                                                 | ENSG00000117133 | RPF1     | 18  | 0  | 0  | 0  | 0  | 0  | 0  | 0  | 0  | 0  | 0  | 1  | 1  | 0  | 0  | 0  | 1  | 0  | 1  | 1  | 0  | 2  | 1  | 1  | 0  | 1  | 0  | 0  | 2  | 5  | 0  |   |
| ENSP00000359691,ENSP00000359694,ENSP00000359725,ENSP00000359727 | ENSG00000146166 | LGSN     | 20  | 2  | 0  | 0  | 0  | 0  | 1  | 1  | 0  | 0  | 0  | 0  | 0  | 0  | 0  | 1  | 1  | 2  | 1  | 2  | 1  | 1  | 1  | 2  | 0  | 0  | 0  | 0  | 1  | 1  | 1  |   |
| ENSP00000359727                                                 | ENSG00000112208 | MAP7D3   | 10  | 0  | 0  | 0  | 0  | 0  | 0  | 0  | 0  | 1  | 0  | 0  | 0  | 0  | 1  | 2  | 1  | 0  | 1  | 0  | 0  | 0  | 0  | 1  | 0  | 0  | 0  | 1  | 1  | 1  | 0  |   |
| ENSP00000359795                                                 | ENSG00000137960 | LAMA5    | 76  | 25 | 13 | 19 | 0  | 0  | 0  | 3  | 3  | 1  | 0  | 1  | 1  | 0  | 0  | 0  | 0  | 2  | 0  | 0  | 0  | 0  | 0  | 2  | 1  | 4  | 1  | 0  | 0  | 0  | 0  |   |
| ENSP00000359795                                                 | ENSG00000137960 | BAG2     | 259 | 11 | 4  | 8  | 7  | 8  | 8  | 9  | 6  | 11 | 4  | 9  | 7  | 9  | 6  | 4  | 8  | 10 | 10 | 10 | 6  | 6  | 7  | 10 | 7  | 10 | 16 | 6  | 12 | 17 | 13 |   |
| ENSP00000359799                                                 | ENSG00000162616 | GIPC2    | 24  | 0  | 0  | 0  | 2  | 1  | 2  | 6  | 0  | 2  | 0  | 0  | 0  | 0  | 0  | 0  | 0  | 0  | 0  | 0  | 0  | 0  | 1  | 1  | 1  | 3  | 3  | 2  | 0  | 0  | 0  |   |
| ENSP00000359801                                                 | ENSG00000151914 | DNAJB4   | 60  | 2  | 1  | 1  | 2  | 2  | 1  | 1  | 3  | 2  | 0  | 4  | 0  | 2  | 1  | 3  | 5  | 4  | 3  | 4  | 1  | 1  | 1  | 2  | 1  | 1  | 2  | 1  | 2  | 4  | 3  |   |
| ENSP00000359818,ENSP00000359837                                 | ENSG00000155229 | DST      | 51  | 2  | 0  | 0  | 3  | 5  | 3  | 2  | 0  | 0  | 2  | 2  | 1  | 2  | 1  | 2  | 4  | 1  | 4  | 2  | 1  | 4  | 0  | 2  | 1  | 0  | 1  | 0  | 2  | 2  | 2  |   |
| ENSP00000359837                                                 | ENSG00000036549 | MMS19    | 71  | 2  | 2  | 2  | 2  | 1  | 2  | 4  | 2  | 4  | 0  | 0  | 1  | 2  | 3  | 3  | 1  | 4  | 4  | 1  | 4  | 3  | 0  | 2  | 1  | 4  | 4  | 5  | 4  | 0  | 4  |   |
| ENSP00000359848                                                 | ENSG00000142892 | ZZZ3     | 13  | 1  | 0  | 0  | 0  | 0  | 0  | 0  | 0  | 1  | 0  | 0  | 0  | 2  | 0  | 0  | 1  | 0  | 0  | 2  | 0  | 1  | 1  | 1  | 1  | 1  | 0  | 0  | 0  | 0  | 0  |   |
| ENSP00000359849                                                 | ENSG00000142892 | PIGK     | 35  | 1  | 1  | 1  | 3  | 2  | 1  | 3  | 2  | 2  | 0  | 1  | 1  | 1  | 0  | 1  | 2  | 0  | 0  | 4  | 2  | 1  | 0  | 1  | 1  | 1  | 1  | 1  | 0  | 0  | 0  | 1 |
| ENSP00000359864                                                 | ENSG00000076716 | PIGK     | 10  | 0  | 0  | 0  | 2  | 0  | 1  | 2  | 0  | 0  | 0  | 0  | 0  | 0  | 0  | 0  | 1  | 0  | 0  | 3  | 0  | 0  | 0  | 0  | 0  | 0  | 0  | 0  | 0  | 0  | 0  | 1 |
| ENSP00000359878,ENSP00000359910                                 | ENSG00000117054 | GPC4     | 14  | 0  | 0  | 0  | 2  | 1  | 0  | 3  | 0  | 2  | 0  | 0  | 0  | 0  | 0  | 0  | 0  | 0  | 0  | 1  | 0  | 0  | 0  | 1  | 0  | 2  | 1  | 1  | 0  | 0  | 0  | 0 |
| ENSP00000359910                                                 | ENSG00000101182 | ACADM    | 209 | 5  | 4  | 5  | 6  | 6  | 4  | 4  | 4  | 3  | 8  | 7  | 6  | 5  | 5  | 7  | 6  | 10 | 7  | 6  | 7  | 9  | 7  | 11 | 5  | 10 | 7  | 7  | 15 | 8  |    |   |
| ENSP00000359923,ENSP00000359925                                 | ENSG00000171311 | PSMA7    | 345 | 14 | 12 | 6  | 7  | 12 | 13 | 9  | 11 | 15 | 3  | 13 | 8  | 13 | 4  | 13 | 12 | 11 | 13 | 14 | 10 | 14 | 7  | 10 | 10 | 16 | 23 | 7  | 13 | 15 | 17 |   |
| ENSP00000359925                                                 | ENSG00000137269 | EXOSC1   | 21  | 0  | 0  | 0  | 0  | 0  | 0  | 0  | 0  | 0  | 0  | 1  | 1  | 1  | 0  | 0  | 3  | 1  | 1  | 0  | 0  | 0  | 0  | 1  | 1  | 0  | 2  | 0  | 2  | 3  | 4  |   |
| ENSP00000359958                                                 | ENSG00000132485 | LRRRC1   | 122 | 12 | 7  | 7  | 2  | 4  | 7  | 3  | 4  | 3  | 0  | 3  | 1  | 2  | 1  | 4  | 5  | 3  | 4  | 3  | 7  | 3  | 3  | 5  | 5  | 6  | 5  | 4  | 5  | 3  | 3  |   |
| ENSP00000359989,ENSP00000360000                                 | ENSG00000116754 | ZRANB2   | 101 | 4  | 5  | 3  | 3  | 2  | 1  | 1  | 4  | 1  | 3  | 5  | 2  | 2  | 5  | 5  | 4  | 6  | 1  | 3  | 3  | 2  | 2  | 4  | 2  | 3  | 5  | 2  | 5  | 12 | 2  |   |
| ENSP00000359990                                                 | ENSG00000066557 | SFRS11   | 127 | 4  | 3  | 3  | 2  | 7  | 6  | 1  | 4  | 5  | 3  | 3  | 6  | 1  | 3  | 4  | 7  | 3  | 5  | 10 | 4  | 4  | 4  | 3  | 10 | 6  | 3  | 2  | 6  | 4  | 3  |   |
| ENSP00000360017,ENSP00000360021                                 | ENSG00000056277 | LRRC40   | 67  | 4  | 2  | 0  | 1  | 1  | 0  | 5  | 2  | 2  | 0  | 0  | 1  | 5  | 5  | 4  | 2  | 0  | 1  | 6  | 5  | 2  | 0  | 0  | 0  | 6  | 1  | 2  | 4  | 3  | 3  |   |
| ENSP00000360031,ENSP00000360033,ENSP00000360034,ENSP00000360039 | ENSG00000059573 | ZNF280C  | 10  | 0  | 0  | 1  | 0  | 0  | 0  | 0  | 0  | 0  | 1  | 1  | 0  | 1  | 0  | 1  | 0  | 0  | 0  | 1  | 1  | 0  | 1  | 0  | 0  | 0  | 0  | 0  | 1  | 1  | 0  |   |
| ENSP00000360039                                                 | ENSG00000079739 | GN212    | 70  | 2  | 1  | 1  | 1  | 3  | 3  | 7  | 2  | 1  | 1  | 1  | 1  | 3  | 1  | 1  | 2  | 2  | 3  | 3  | 1  | 2  | 4  | 1  | 3  | 4  | 5  | 4  | 2  | 2  | 1  | 3 |
| ENSP00000360041,ENSP00000360042,ENSP00000360046                 | ENSG00000008740 | RRP12    | 395 | 16 | 12 | 12 | 6  | 6  | 8  | 9  | 9  | 15 | 13 | 25 | 10 | 9  | 8  | 11 | 14 | 13 | 16 | 7  | 11 | 10 | 13 | 18 |    |    |    |    |    |    |    |   |



[illegible]



|                                            |                 |          |      |    |    |    |    |    |    |    |    |    |    |    |    |    |    |    |    |    |    |    |    |    |    |    |    |    |    |    |    |     |    |   |
|--------------------------------------------|-----------------|----------|------|----|----|----|----|----|----|----|----|----|----|----|----|----|----|----|----|----|----|----|----|----|----|----|----|----|----|----|----|-----|----|---|
| ENSP00000364721                            | ENSG00000101367 | MAPRE1   | 290  | 20 | 11 | 20 | 9  | 20 | 9  | 9  | 9  | 9  | 7  | 12 | 4  | 8  | 5  | 8  | 4  | 10 | 11 | 7  | 14 | 10 | 3  | 7  | 7  | 13 | 9  | 3  | 12 | 9   | 11 |   |
| ENSP00000364744,ENSP000000:ENSG00000198000 |                 | NOL8     | 28   | 1  | 0  | 1  | 4  | 1  | 1  | 2  | 1  | 0  | 1  | 4  | 3  | 1  | 1  | 0  | 0  | 0  | 0  | 2  | 0  | 1  | 0  | 1  | 3  | 0  | 0  | 0  | 0  | 0   | 0  |   |
| ENSP00000364754,ENSP000000:ENSG00000126217 |                 | MCF2L    | 23   | 3  | 1  | 0  | 1  | 0  | 1  | 2  | 0  | 0  | 0  | 1  | 1  | 0  | 0  | 0  | 1  | 0  | 0  | 2  | 0  | 1  | 0  | 1  | 0  | 3  | 4  | 0  | 0  | 1   | 0  |   |
| ENSP00000364794,ENSP000000:ENSG00000196305 |                 | IARS     | 769  | 13 | 11 | 5  | 22 | 39 | 29 | 28 | 17 | 22 | 2  | 19 | 13 | 26 | 9  | 29 | 27 | 38 | 36 | 24 | 33 | 26 | 17 | 23 | 22 | 43 | 41 | 30 | 33 | 52  | 40 |   |
| ENSP00000364796,ENSP000000:ENSG00000068650 |                 | ATP11A   | 35   | 1  | 4  | 2  | 4  | 6  | 5  | 2  | 3  | 2  | 0  | 0  | 0  | 0  | 0  | 0  | 1  | 0  | 0  | 1  | 0  | 0  | 0  | 1  | 1  | 1  | 0  | 0  | 0  | 0   | 1  |   |
| ENSP00000364864                            | ENSG00000101350 | KIF3B    | 16   | 2  | 0  | 1  | 1  | 0  | 2  | 1  | 0  | 2  | 0  | 2  | 0  | 1  | 0  | 0  | 0  | 0  | 0  | 1  | 0  | 0  | 0  | 0  | 0  | 0  | 0  | 0  | 1  | 0   | 1  |   |
| ENSP00000364883                            | ENSG00000148090 | AUH      | 16   | 0  | 0  | 0  | 0  | 0  | 1  | 0  | 0  | 2  | 0  | 1  | 1  | 0  | 0  | 0  | 0  | 1  | 1  | 1  | 1  | 1  | 0  | 1  | 1  | 1  | 1  | 0  | 0  | 1   | 1  |   |
| ENSP00000364902                            | ENSG00000101346 | POFUT1   | 95   | 6  | 4  | 4  | 3  | 4  | 4  | 7  | 3  | 2  | 4  | 2  | 4  | 4  | 5  | 2  | 2  | 2  | 3  | 3  | 5  | 3  | 3  | 2  | 3  | 3  | 1  | 3  | 1  | 0   | 2  |   |
| ENSP00000364904,ENSP000000:ENSG00000165025 |                 | SYK      | 24   | 0  | 0  | 0  | 4  | 2  | 0  | 1  | 0  | 0  | 0  | 4  | 2  | 0  | 0  | 0  | 0  | 0  | 0  | 0  | 0  | 1  | 1  | 0  | 1  | 0  | 2  | 2  | 1  | 1   | 1  |   |
| ENSP00000364912                            | ENSG00000065526 | SPEN     | 69   | 1  | 1  | 2  | 4  | 2  | 2  | 4  | 1  | 1  | 4  | 4  | 2  | 1  | 1  | 2  | 1  | 1  | 2  | 5  | 1  | 3  | 3  | 7  | 5  | 1  | 1  | 1  | 2  | 3   | 1  |   |
| ENSP00000364926,ENSP000000:ENSG00000162458 |                 | FBLIM1   | 16   | 0  | 0  | 0  | 2  | 1  | 1  | 0  | 0  | 0  | 0  | 1  | 0  | 1  | 2  | 0  | 0  | 0  | 0  | 0  | 0  | 0  | 1  | 1  | 0  | 3  | 1  | 2  | 0  | 0   | 0  |   |
| ENSP00000364927,ENSP000000:ENSG00000179222 |                 | MAGED1   | 23   | 2  | 2  | 2  | 1  | 0  | 0  | 1  | 0  | 0  | 0  | 1  | 1  | 1  | 0  | 2  | 1  | 0  | 0  | 1  | 1  | 2  | 0  | 1  | 0  | 0  | 0  | 0  | 2  | 1   | 1  |   |
| ENSP00000364965,ENSP000000:ENSG00000187742 |                 | SECISBP2 | 21   | 0  | 0  | 0  | 0  | 0  | 1  | 0  | 1  | 1  | 1  | 0  | 0  | 0  | 0  | 0  | 4  | 0  | 1  | 2  | 0  | 1  | 3  | 0  | 0  | 1  | 2  | 0  | 0  | 1   | 0  | 2 |
| ENSP00000364986                            | ENSG00000116771 | AGMAT    | 29   | 5  | 2  | 1  | 3  | 0  | 2  | 4  | 0  | 1  | 0  | 0  | 0  | 1  | 0  | 0  | 0  | 0  | 0  | 0  | 0  | 0  | 0  | 3  | 0  | 1  | 2  | 0  | 0  | 1   | 3  |   |
| ENSP00000365016                            | ENSG00000185950 | IRS2     | 29   | 1  | 1  | 0  | 3  | 4  | 3  | 1  | 0  | 1  | 0  | 0  | 1  | 0  | 0  | 0  | 0  | 0  | 0  | 0  | 0  | 1  | 0  | 0  | 1  | 1  | 6  | 2  | 2  | 0   | 0  | 1 |
| ENSP00000365019,ENSP000000:ENSG00000106723 |                 | SPIN1    | 12   | 1  | 0  | 0  | 0  | 0  | 1  | 0  | 0  | 0  | 0  | 0  | 1  | 0  | 0  | 0  | 0  | 1  | 1  | 1  | 1  | 1  | 0  | 0  | 0  | 0  | 1  | 0  | 1  | 1   | 1  |   |
| ENSP00000365045                            | ENSG00000204434 | POTEK    | 380  | 12 | 11 | 7  | 11 | 14 | 13 | 25 | 9  | 14 | 3  | 25 | 8  | 12 | 3  | 10 | 11 | 19 | 14 | 12 | 12 | 8  | 7  | 15 | 11 | 18 | 20 | 18 | 9  | 18  | 11 |   |
| ENSP00000365120                            | ENSG00000149599 | DUSP15   | 11   | 1  | 1  | 0  | 0  | 0  | 0  | 0  | 0  | 0  | 1  | 0  | 0  | 1  | 1  | 0  | 0  | 1  | 0  | 0  | 1  | 0  | 0  | 0  | 0  | 0  | 1  | 0  | 1  | 0   | 2  |   |
| ENSP00000365130,ENSP000000:ENSG00000083223 |                 | ZCCHC6   | 16   | 0  | 0  | 0  | 1  | 1  | 0  | 0  | 0  | 0  | 1  | 0  | 0  | 0  | 0  | 0  | 0  | 2  | 0  | 2  | 1  | 0  | 0  | 0  | 1  | 1  | 3  | 0  | 0  | 1   | 2  |   |
| ENSP00000365147                            | ENSG00000142634 | EFHD2    | 293  | 9  | 7  | 7  | 12 | 26 | 15 | 11 | 6  | 10 | 4  | 6  | 6  | 9  | 7  | 10 | 9  | 13 | 8  | 9  | 14 | 8  | 7  | 6  | 3  | 12 | 13 | 7  | 14 | 13  | 2  |   |
| ENSP00000365158,ENSP000000:ENSG00000136731 |                 | UGGT1    | 470  | 15 | 17 | 18 | 17 | 20 | 20 | 15 | 11 | 19 | 6  | 20 | 10 | 13 | 9  | 15 | 17 | 16 | 14 | 12 | 17 | 20 | 10 | 22 | 16 | 20 | 22 | 18 | 12 | 17  | 12 |   |
| ENSP00000365182,ENSP000000:ENSG00000171729 |                 | TMEM51   | 11   | 1  | 0  | 0  | 1  | 1  | 1  | 0  | 2  | 1  | 0  | 0  | 0  | 0  | 0  | 1  | 0  | 0  | 0  | 1  | 1  | 0  | 0  | 1  | 0  | 0  | 0  | 0  | 0  | 0   | 0  | 0 |
| ENSP00000365210,ENSP000000:ENSG00000147082 |                 | CCNB3    | 12   | 1  | 0  | 0  | 0  | 1  | 1  | 0  | 0  | 0  | 0  | 0  | 0  | 0  | 0  | 0  | 0  | 0  | 0  | 0  | 1  | 0  | 1  | 1  | 0  | 0  | 0  | 1  | 1  | 0   | 1  | 2 |
| ENSP00000365220,ENSP000000:ENSG00000134900 |                 | TPP2     | 389  | 15 | 15 | 10 | 15 | 20 | 14 | 14 | 7  | 14 | 6  | 17 | 8  | 15 | 7  | 12 | 5  | 5  | 8  | 13 | 19 | 15 | 14 | 11 | 9  | 20 | 16 | 13 | 16 | 19  | 17 |   |
| ENSP00000365230,ENSP000000:ENSG00000171552 |                 | BCL2L1   | 65   | 4  | 1  | 6  | 1  | 1  | 1  | 2  | 2  | 1  | 5  | 2  | 3  | 2  | 2  | 2  | 0  | 3  | 1  | 3  | 2  | 0  | 3  | 5  | 2  | 0  | 1  | 1  | 4  | 3   | 2  |   |
| ENSP00000365297                            | ENSG00000180991 |          | 13   | 1  | 0  | 1  | 1  | 1  | 1  | 2  | 0  | 0  | 0  | 0  | 0  | 1  | 1  | 0  | 0  | 0  | 0  | 1  | 1  | 1  | 0  | 0  | 0  | 0  | 0  | 0  | 1  | 0   | 0  | 0 |
| ENSP00000365370                            | ENSG00000179172 | HNRNPCL  | 582  | 20 | 15 | 13 | 15 | 23 | 16 | 18 | 18 | 14 | 9  | 25 | 19 | 19 | 13 | 21 | 15 | 21 | 21 | 28 | 22 | 19 | 20 | 30 | 16 | 25 | 25 | 13 | 23 | 29  | 17 |   |
| ENSP00000365401                            | ENSG00000101997 | CCDC22   | 74   | 7  | 2  | 1  | 3  | 0  | 3  | 2  | 0  | 2  | 0  | 2  | 0  | 5  | 0  | 3  | 2  | 1  | 2  | 5  | 1  | 2  | 0  | 3  | 0  | 5  | 13 | 3  | 0  | 3   | 4  |   |
| ENSP00000365402                            | ENSG00000204525 | HLA-C    | 113  | 1  | 1  | 0  | 6  | 10 | 6  | 8  | 6  | 5  | 1  | 7  | 3  | 0  | 0  | 3  | 3  | 10 | 5  | 3  | 3  | 4  | 3  | 7  | 3  | 0  | 1  | 0  | 1  | 4   | 6  | 3 |
| ENSP00000365412,ENSP000000:ENSG00000204525 |                 | HLA-C    | 98   | 3  | 2  | 0  | 8  | 7  | 7  | 5  | 4  | 2  | 1  | 4  | 3  | 1  | 0  | 3  | 3  | 6  | 6  | 2  | 2  | 5  | 3  | 4  | 4  | 1  | 2  | 1  | 1  | 4   | 4  | 3 |
| ENSP00000365432                            | ENSG00000165119 | HNRNPK   | 677  | 15 | 20 | 13 | 17 | 41 | 20 | 23 | 21 | 19 | 14 | 30 | 22 | 16 | 14 | 17 | 25 | 35 | 23 | 36 | 27 | 29 | 19 | 23 | 16 | 25 | 27 | 19 | 22 | 26  | 23 |   |
| ENSP00000365458,ENSP000000:ENSG00000165119 |                 | HNRNPK   | 1514 | 43 | 45 | 30 | 36 | 69 | 43 | 50 | 35 | 46 | 33 | 76 | 46 | 39 | 40 | 43 | 49 | 62 | 50 | 57 | 63 | 59 | 46 | 69 | 43 | 51 | 68 | 45 | 61 | 67  | 50 |   |
| ENSP00000365463,ENSP000000:ENSG00000175198 |                 | PCCA     | 117  | 7  | 5  | 1  | 9  | 11 | 12 | 5  | 4  | 4  | 1  | 4  | 3  | 3  | 1  | 3  | 2  | 5  | 2  | 4  | 2  | 5  | 0  | 1  | 2  | 8  | 6  | 7  | 0  | 0   | 0  |   |
| ENSP00000365522                            | ENSG00000165118 | C9orf64  | 139  | 6  | 3  | 2  | 10 | 10 | 6  | 5  | 1  | 3  | 0  | 5  | 4  | 6  | 2  | 7  | 1  | 0  | 0  | 5  | 7  | 9  | 1  | 1  | 3  | 3  | 3  | 2  | 8  | 17  | 9  |   |
| ENSP00000365524,ENSP000000:ENSG00000068394 |                 | GPKOW    | 109  | 4  | 2  | 4  | 5  | 3  | 5  | 2  | 1  | 3  | 2  | 8  | 4  | 5  | 6  | 6  | 3  | 2  | 4  | 4  | 5  | 3  | 2  | 3  | 2  | 4  | 5  | 1  | 5  | 2   | 4  |   |
| ENSP00000365530                            | ENSG00000166263 | STXBP4   | 10   | 2  | 0  | 0  | 2  | 0  | 0  | 0  | 1  | 0  | 1  | 0  | 0  | 0  | 0  | 0  | 1  | 0  | 0  | 0  | 0  | 0  | 1  | 0  | 0  | 0  | 0  | 1  | 1  | 0   | 0  | 0 |
| ENSP00000365534                            | ENSG00000185875 | THNSL1   | 88   | 0  | 1  | 1  | 0  | 0  | 0  | 1  | 1  | 1  | 0  | 2  | 1  | 2  | 0  | 4  | 4  | 1  | 1  | 4  | 2  | 4  | 2  | 5  | 4  | 4  | 4  | 4  | 13 | 12  | 10 |   |
| ENSP00000365538,ENSP000000:ENSG00000125246 |                 | CLYBL    | 64   | 0  | 0  | 0  | 7  | 10 | 8  | 4  | 2  | 0  | 0  | 0  | 0  | 1  | 0  | 1  | 5  | 6  | 3  | 4  | 3  | 0  | 1  | 2  | 0  | 3  | 2  | 0  | 2  | 0   | 0  |   |
| ENSP00000365558                            | ENSG00000099256 | PRTFDC1  | 22   | 2  | 2  | 1  | 0  | 1  | 0  | 1  | 1  | 0  | 0  | 0  | 1  | 1  | 2  | 2  | 0  | 0  | 0  | 1  | 2  | 1  | 0  | 0  | 0  | 0  | 0  | 0  | 1  | 1   | 1  |   |
| ENSP00000365567                            | ENSG00000125304 | TMSF2    | 136  | 11 | 4  | 3  | 5  | 7  | 6  | 6  | 3  | 6  | 0  | 7  | 4  | 3  | 3  | 6  | 0  | 7  | 2  | 5  | 3  | 4  | 6  | 3  | 8  | 4  | 4  | 8  | 3  | 2   | 3  | 3 |
| ENSP00000365570                            | ENSG00000102050 |          | 36   | 0  | 0  | 1  | 1  | 1  | 2  | 0  | 0  | 0  | 1  | 4  | 4  | 2  | 3  | 2  | 1  | 2  | 3  | 3  | 1  | 4  | 0  | 0  | 0  | 1  | 0  | 0  | 0  | 0   | 0  | 0 |
| ENSP00000365572,ENSP000000:ENSG00000011052 |                 | NME1-NMI | 529  | 29 | 20 | 19 | 9  | 23 | 21 | 17 | 9  | 14 | 5  | 23 | 10 | 15 | 14 | 14 | 22 | 25 | 23 | 18 | 21 | 12 | 6  | 15 | 8  | 23 | 25 | 24 | 17 | 26  | 22 |   |
| ENSP00000365576,ENSP000000:ENSG00000135018 |                 | UBQLN1   | 87   | 2  | 2  | 0  | 2  | 2  | 2  | 2  | 2  | 3  | 1  | 3  | 2  | 2  | 2  | 4  | 5  | 1  | 4  | 3  | 1  | 6  | 1  | 3  | 1  | 5  | 6  | 4  | 1  | 9   | 6  |   |
| ENSP00000365589                            | ENSG00000008294 | SPAG9    | 169  | 11 | 9  | 11 | 3  | 5  | 8  | 5  | 8  | 3  | 0  | 1  | 1  | 3  | 3  | 5  | 2  | 7  | 6  | 6  | 10 | 7  | 2  | 4  | 3  | 7  | 13 | 5  | 9  | 6   | 6  |   |
| ENSP00000365604                            | ENSG00000107863 | ARHGAP2  | 11   | 0  | 0  | 0  | 0  | 0  | 0  | 1  | 1  | 0  | 0  | 0  | 0  | 1  | 0  | 0  | 0  | 0  | 1  | 0  | 2  | 0  | 0  | 1  | 0  | 0  | 1  | 1  | 0  | 1   | 1  |   |
| ENSP00000365628,ENSP000000:ENSG00000068400 |                 | GRIPAP1  | 93   | 3  | 1  | 0  | 10 | 11 | 12 | 5  | 1  | 3  | 1  | 3  | 2  | 3  | 1  | 1  | 2  | 2  | 1  | 6  | 1  | 1  | 2  | 2  | 0  | 4  | 1  | 3  | 6  | 2   | 3  |   |
| ENSP00000365630                            | ENSG00000165105 | RASEF    | 150  | 5  | 3  | 4  | 6  | 7  | 5  | 17 | 8  | 3  | 2  | 5  | 2  | 4  | 2  | 6  | 2  | 5  | 5  | 6  | 5  | 4  | 4  | 7  | 3  | 9  | 5  | 3  | 4  | 5   | 4  |   |
| ENSP00000365636,ENSP000000:ENSG00000088387 |                 | DOCK9    | 89   | 22 | 6  | 7  | 7  | 4  | 6  | 2  | 0  | 0  | 0  | 11 | 5  | 0  | 0  | 0  | 3  | 1  | 2  | 2  | 0  | 2  | 0  | 1  | 1  | 2  | 1  | 0  | 1  | 2   | 1  |   |
| ENSP00000365637                            | ENSG00000120549 | KIAA1217 | 189  | 39 | 36 | 34 | 3  | 4  | 6  | 3  | 2  | 0  | 2  | 2  | 4  | 3  | 2  | 5  | 2  | 2  | 0  | 4  | 4  | 2  | 4  | 5  | 3  | 7  | 4  | 4  | 2  | 1   | 0  |   |
| ENSP00000365643,ENSP000000:ENSG00000088387 |                 | DOCK9    | 95   | 23 | 7  | 8  | 7  | 4  | 6  | 2  | 0  | 0  | 1  | 12 | 6  | 0  | 0  | 0  | 3  | 1  | 2  | 2  | 0  | 2  | 0  | 1  | 1  | 2  | 1  | 0  | 1  | 2</ |    |   |





|                                 |                  |          |     |     |    |    |    |    |    |    |    |    |    |    |    |    |    |    |    |    |    |    |    |    |    |    |    |    |    |    |    |    |    |   |
|---------------------------------|------------------|----------|-----|-----|----|----|----|----|----|----|----|----|----|----|----|----|----|----|----|----|----|----|----|----|----|----|----|----|----|----|----|----|----|---|
| ENSP00000370074                 | ENSG00000170542  | SERPINB9 | 88  | 0   | 1  | 0  | 0  | 1  | 0  | 3  | 1  | 1  | 0  | 1  | 0  | 0  | 0  | 7  | 11 | 10 | 10 | 5  | 4  | 1  | 4  | 2  | 0  | 0  | 1  | 8  | 10 | 7  |    |   |
| ENSP00000370077,ENSP00000370077 | ENSG00000164989  | C9orf93  | 14  | 0   | 1  | 1  | 0  | 1  | 0  | 0  | 0  | 0  | 1  | 2  | 0  | 0  | 2  | 0  | 0  | 1  | 0  | 1  | 0  | 0  | 1  | 0  | 1  | 0  | 0  | 0  | 1  | 0  |    |   |
| ENSP00000370105,ENSP00000370105 | ENSG00000145736  | AC044797 | 46  | 1   | 1  | 1  | 2  | 2  | 1  | 2  | 3  | 0  | 1  | 0  | 1  | 1  | 2  | 1  | 1  | 2  | 2  | 2  | 3  | 0  | 2  | 1  | 1  | 1  | 3  | 0  | 4  | 3  | 2  |   |
| ENSP00000370109,ENSP00000370109 | ENSG00000164985  | PSIP1    | 375 | 10  | 3  | 8  | 6  | 11 | 4  | 7  | 8  | 9  | 14 | 8  | 10 | 13 | 18 | 14 | 11 | 16 | 9  | 17 | 22 | 21 | 13 | 11 | 10 | 15 | 10 | 8  | 22 | 24 | 23 |   |
| ENSP00000370111                 | ENSG00000138771  | SHROOMC  | 28  | 1   | 1  | 0  | 0  | 1  | 3  | 0  | 0  | 0  | 0  | 0  | 2  | 0  | 1  | 2  | 1  | 1  | 4  | 2  | 2  | 2  | 0  | 2  | 0  | 0  | 1  | 1  | 2  | 1  |    |   |
| ENSP00000370113,ENSP00000370113 | ENSG00000221914  | PPP2R2A  | 108 | 2   | 3  | 2  | 3  | 4  | 4  | 2  | 3  | 3  | 1  | 5  | 2  | 6  | 4  | 4  | 2  | 4  | 2  | 6  | 7  | 3  | 3  | 2  | 2  | 5  | 3  | 3  | 8  | 6  |    |   |
| ENSP00000370115                 | ENSG00000021355  | SERPINB1 | 504 | 15  | 12 | 8  | 19 | 39 | 27 | 20 | 14 | 17 | 3  | 8  | 4  | 9  | 6  | 9  | 16 | 25 | 16 | 19 | 23 | 14 | 11 | 16 | 9  | 39 | 40 | 32 | 11 | 16 | 7  |   |
| ENSP00000370128                 | ENSG00000139514  | SLC7A1   | 70  | 0   | 3  | 0  | 3  | 0  | 2  | 6  | 3  | 3  | 1  | 5  | 6  | 1  | 0  | 4  | 3  | 1  | 4  | 3  | 2  | 3  | 1  | 1  | 2  | 1  | 2  | 2  | 3  | 2  | 3  |   |
| ENSP00000370150,ENSP00000370150 | ENSG00000124535  | WRNIP1   | 119 | 4   | 3  | 5  | 4  | 3  | 2  | 3  | 2  | 2  | 2  | 5  | 1  | 1  | 1  | 1  | 4  | 10 | 7  | 8  | 8  | 5  | 4  | 3  | 2  | 5  | 4  | 5  | 5  | 6  | 4  |   |
| ENSP00000370173                 | ENSG00000100258  | LMF2     | 17  | 1   | 0  | 2  | 1  | 0  | 0  | 0  | 1  | 0  | 0  | 0  | 0  | 1  | 0  | 0  | 2  | 0  | 2  | 3  | 0  | 0  | 1  | 1  | 1  | 0  | 0  | 1  | 0  | 0  | 0  |   |
| ENSP00000370193,ENSP00000370193 | ENSG000000085231 | TAF9     | 41  | 2   | 1  | 0  | 3  | 1  | 1  | 3  | 1  | 0  | 0  | 1  | 2  | 2  | 2  | 1  | 0  | 3  | 2  | 2  | 2  | 2  | 1  | 1  | 2  | 1  | 0  | 1  | 2  | 1  | 1  |   |
| ENSP00000370194                 | ENSG00000112699  | GMD5     | 56  | 1   | 1  | 1  | 2  | 6  | 9  | 3  | 2  | 3  | 1  | 0  | 1  | 1  | 1  | 1  | 0  | 0  | 0  | 2  | 2  | 2  | 2  | 1  | 1  | 2  | 3  | 6  | 1  | 1  | 0  |   |
| ENSP00000370196,ENSP00000370196 | ENSG00000100241  | SBF1     | 24  | 0   | 1  | 0  | 4  | 5  | 4  | 1  | 0  | 0  | 0  | 0  | 0  | 1  | 0  | 0  | 1  | 1  | 0  | 1  | 1  | 0  | 0  | 0  | 0  | 1  | 0  | 3  | 0  | 0  | 0  |   |
| ENSP00000370197,ENSP00000370197 | ENSG00000185057  |          | 38  | 5   | 3  | 1  | 3  | 1  | 1  | 0  | 0  | 0  | 0  | 0  | 0  | 1  | 0  | 3  | 2  | 0  | 1  | 4  | 1  | 2  | 0  | 1  | 2  | 2  | 1  | 0  | 1  | 0  | 3  |   |
| ENSP00000370208,ENSP00000370208 | ENSG00000154710  | RABGEF1  | 31  | 0   | 0  | 1  | 1  | 2  | 0  | 1  | 1  | 1  | 0  | 0  | 1  | 2  | 1  | 1  | 0  | 1  | 0  | 1  | 2  | 1  | 1  | 1  | 1  | 0  | 2  | 2  | 2  | 1  | 4  |   |
| ENSP00000370223                 | ENSG00000101365  | IDH3B    | 151 | 5   | 3  | 5  | 5  | 8  | 4  | 3  | 0  | 6  | 5  | 8  | 3  | 4  | 2  | 4  | 2  | 5  | 4  | 8  | 8  | 4  | 8  | 9  | 5  | 6  | 5  | 3  | 9  | 7  | 3  |   |
| ENSP00000370242,ENSP00000370242 | ENSG000000047644 | WWC3     | 15  | 0   | 0  | 0  | 1  | 0  | 0  | 0  | 1  | 1  | 0  | 0  | 0  | 2  | 0  | 1  | 0  | 0  | 1  | 2  | 1  | 1  | 1  | 0  | 1  | 0  | 1  | 1  | 0  | 0  | 0  |   |
| ENSP00000370295,ENSP00000370295 | ENSG00000170638  | TRABD    | 31  | 2   | 0  | 0  | 2  | 1  | 1  | 2  | 2  | 0  | 0  | 0  | 0  | 1  | 0  | 1  | 0  | 0  | 1  | 2  | 2  | 3  | 1  | 2  | 2  | 1  | 1  | 1  | 0  | 2  | 1  |   |
| ENSP00000370299                 | ENSG00000146950  | SHROOM2  | 26  | 4   | 2  | 2  | 0  | 0  | 0  | 2  | 1  | 0  | 0  | 0  | 1  | 0  | 2  | 0  | 0  | 0  | 1  | 5  | 1  | 0  | 0  | 2  | 1  | 0  | 1  | 0  | 0  | 0  | 1  |   |
| ENSP00000370376,ENSP00000370376 | ENSG00000128951  | DUT      | 122 | 9   | 2  | 0  | 4  | 7  | 4  | 5  | 0  | 7  | 0  | 9  | 3  | 4  | 3  | 5  | 5  | 1  | 4  | 5  | 4  | 9  | 0  | 5  | 4  | 3  | 5  | 2  | 3  | 5  | 5  |   |
| ENSP00000370377                 | ENSG00000107959  | PITRM1   | 314 | 17  | 13 | 11 | 11 | 11 | 14 | 16 | 12 | 10 | 5  | 3  | 3  | 6  | 2  | 8  | 6  | 11 | 5  | 9  | 12 | 7  | 13 | 18 | 14 | 11 | 17 | 9  | 13 | 16 | 11 |   |
| ENSP00000370384,ENSP00000370384 | ENSG00000184281  | TSSC4    | 29  | 2   | 1  | 0  | 0  | 1  | 1  | 0  | 0  | 1  | 0  | 2  | 0  | 1  | 1  | 1  | 1  | 1  | 1  | 1  | 2  | 1  | 1  | 1  | 2  | 1  | 1  | 0  | 1  | 2  | 1  |   |
| ENSP00000370395                 | ENSG00000197860  | SGTB     | 24  | 0   | 0  | 1  | 0  | 0  | 1  | 0  | 1  | 1  | 0  | 0  | 0  | 0  | 0  | 0  | 2  | 2  | 2  | 2  | 0  | 1  | 0  | 0  | 0  | 1  | 1  | 0  | 1  | 2  | 4  | 2 |
| ENSP00000370412                 | ENSG00000119778  | ATAD2B   | 26  | 1   | 1  | 3  | 1  | 1  | 0  | 1  | 0  | 2  | 1  | 0  | 2  | 0  | 0  | 0  | 1  | 0  | 0  | 0  | 1  | 2  | 2  | 1  | 2  | 1  | 0  | 0  | 1  | 1  | 1  |   |
| ENSP00000370460                 | ENSG00000153015  | SDCCAG1  | 56  | 1   | 2  | 3  | 1  | 2  | 1  | 1  | 0  | 3  | 1  | 3  | 1  | 2  | 1  | 1  | 2  | 2  | 1  | 1  | 3  | 1  | 2  | 3  | 2  | 2  | 3  | 2  | 3  | 4  | 2  |   |
| ENSP00000370467                 | ENSG00000130021  | HDHD1A   | 19  | 2   | 2  | 2  | 2  | 1  | 1  | 0  | 0  | 0  | 0  | 0  | 0  | 0  | 2  | 0  | 1  | 0  | 0  | 0  | 1  | 1  | 0  | 0  | 0  | 1  | 0  | 0  | 0  | 0  | 1  |   |
| ENSP00000370517                 | ENSG00000067057  | PFKP     | 414 | 24  | 22 | 17 | 11 | 18 | 15 | 14 | 8  | 17 | 0  | 8  | 4  | 8  | 4  | 14 | 20 | 23 | 26 | 20 | 15 | 18 | 4  | 13 | 8  | 12 | 15 | 9  | 15 | 17 | 15 |   |
| ENSP00000370526                 | ENSG00000157399  | ARSE     | 11  | 1   | 2  | 0  | 0  | 0  | 2  | 1  | 1  | 0  | 0  | 0  | 0  | 0  | 0  | 0  | 0  | 0  | 0  | 1  | 1  | 0  | 1  | 1  | 0  | 0  | 0  | 0  | 0  | 0  | 0  |   |
| ENSP00000370543                 | ENSG00000198743  | SLC5A3   | 13  | 1   | 0  | 0  | 0  | 0  | 0  | 0  | 0  | 0  | 0  | 0  | 1  | 3  | 0  | 0  | 2  | 0  | 0  | 1  | 0  | 1  | 0  | 2  | 2  | 0  | 0  | 0  | 0  | 0  | 0  |   |
| ENSP00000370588,ENSP00000370588 | ENSG000000002586 | CD99     | 22  | 7   | 4  | 1  | 0  | 0  | 0  | 1  | 0  | 0  | 0  | 0  | 1  | 0  | 1  | 0  | 2  | 0  | 0  | 0  | 1  | 0  | 1  | 0  | 0  | 0  | 0  | 0  | 0  | 2  | 1  |   |
| ENSP00000370589                 | ENSG00000101361  | NOP56    | 568 | 19  | 9  | 14 | 11 | 12 | 9  | 19 | 10 | 17 | 24 | 36 | 22 | 17 | 15 | 23 | 16 | 20 | 18 | 15 | 20 | 16 | 24 | 34 | 22 | 18 | 23 | 14 | 16 | 35 | 20 |   |
| ENSP00000370593,ENSP00000370593 | ENSG00000153707  | PTPRD    | 28  | 1   | 3  | 1  | 2  | 3  | 1  | 0  | 2  | 0  | 0  | 2  | 0  | 0  | 1  | 5  | 2  | 1  | 0  | 0  | 0  | 0  | 0  | 2  | 1  | 1  | 1  | 0  | 1  | 1  | 2  |   |
| ENSP00000370625,ENSP00000370625 | ENSG000000047315 | POLR2B   | 171 | 6   | 7  | 4  | 9  | 4  | 6  | 7  | 4  | 5  | 2  | 8  | 5  | 9  | 2  | 4  | 8  | 7  | 7  | 7  | 6  | 5  | 2  | 7  | 2  | 4  | 5  | 4  | 6  | 7  | 12 |   |
| ENSP00000370648                 | ENSG00000185013  | NT5C1B   | 46  | 0   | 1  | 1  | 0  | 0  | 0  | 1  | 1  | 1  | 3  | 0  | 0  | 2  | 2  | 2  | 0  | 3  | 1  | 2  | 1  | 2  | 4  | 5  | 1  | 4  | 0  | 0  | 4  | 1  | 1  |   |
| ENSP00000370695,ENSP00000370695 | ENSG00000099098  | EXOC1    | 71  | 2   | 4  | 2  | 6  | 7  | 4  | 3  | 3  | 2  | 0  | 1  | 0  | 1  | 1  | 1  | 0  | 4  | 0  | 3  | 2  | 0  | 5  | 3  | 2  | 5  | 3  | 4  | 1  | 1  | 1  |   |
| ENSP00000370718                 | ENSG00000169093  | ASMTL    | 47  | 1   | 1  | 0  | 2  | 0  | 0  | 1  | 1  | 0  | 0  | 0  | 0  | 0  | 0  | 2  | 4  | 3  | 5  | 2  | 4  | 6  | 0  | 0  | 0  | 4  | 1  | 0  | 3  | 4  | 3  |   |
| ENSP00000370736                 | ENSG00000134851  | TMEM165  | 57  | 2   | 3  | 0  | 2  | 1  | 4  | 2  | 0  | 4  | 0  | 2  | 0  | 1  | 1  | 3  | 1  | 0  | 2  | 2  | 0  | 3  | 0  | 5  | 6  | 1  | 3  | 0  | 0  | 5  | 4  |   |
| ENSP00000370739,ENSP00000370739 | ENSG00000108515  | ENO3     | 324 | 13  | 9  | 4  | 8  | 6  | 17 | 7  | 3  | 12 | 4  | 17 | 5  | 11 | 3  | 13 | 14 | 4  | 17 | 14 | 15 | 13 | 3  | 10 | 7  | 15 | 20 | 15 | 12 | 22 | 11 |   |
| ENSP00000370740,ENSP00000370740 | ENSG00000178445  | GLDC     | 57  | 24  | 18 | 15 | 0  | 0  | 0  | 0  | 0  | 0  | 0  | 0  | 0  | 0  | 0  | 0  | 0  | 0  | 0  | 0  | 0  | 0  | 0  | 0  | 0  | 0  | 0  | 0  | 0  | 0  | 0  |   |
| ENSP00000370741,ENSP00000370741 | ENSG00000066654  | THUMPDP1 | 45  | 1   | 1  | 0  | 2  | 0  | 0  | 3  | 2  | 2  | 0  | 1  | 0  | 3  | 0  | 0  | 2  | 3  | 1  | 3  | 3  | 2  | 4  | 1  | 4  | 1  | 2  | 1  | 1  | 1  | 1  |   |
| ENSP00000370744                 | ENSG00000123104  | ITPR2    | 92  | 2   | 3  | 2  | 8  | 5  | 3  | 3  | 1  | 0  | 1  | 1  | 3  | 4  | 3  | 0  | 2  | 0  | 0  | 7  | 9  | 4  | 1  | 2  | 5  | 9  | 10 | 3  | 0  | 1  | 0  |   |
| ENSP00000370745,ENSP00000370745 | ENSG00000079785  | DDX1     | 302 | 14  | 11 | 8  | 8  | 11 | 9  | 7  | 7  | 6  | 4  | 19 | 5  | 10 | 6  | 11 | 9  | 11 | 6  | 9  | 17 | 15 | 5  | 11 | 9  | 11 | 15 | 9  | 8  | 19 | 12 |   |
| ENSP00000370746,ENSP00000370746 | ENSG00000128739  | SNRPN    | 129 | 7   | 3  | 1  | 0  | 0  | 4  | 5  | 1  | 2  | 0  | 7  | 5  | 6  | 1  | 4  | 7  | 4  | 5  | 9  | 3  | 3  | 2  | 11 | 3  | 5  | 4  | 3  | 3  | 11 | 4  |   |
| ENSP00000370748                 | ENSG00000067064  | IDI1     | 49  | 2   | 4  | 3  | 1  | 2  | 1  | 2  | 1  | 3  | 0  | 0  | 0  | 2  | 1  | 1  | 1  | 1  | 0  | 1  | 3  | 5  | 0  | 1  | 1  | 2  | 4  | 2  | 1  | 3  | 1  |   |
| ENSP00000370761                 | ENSG00000202075  | LYRM5    | 11  | 0   | 0  | 0  | 0  | 0  | 0  | 1  | 0  | 0  | 0  | 0  | 1  | 1  | 0  | 2  | 0  | 1  | 0  | 1  | 0  | 1  | 0  | 0  | 1  | 0  | 0  | 1  | 0  | 0  | 0  |   |
| ENSP00000370764,ENSP00000370764 | ENSG00000140264  | SERF2    | 39  | 2   | 3  | 0  | 1  | 3  | 1  | 4  | 2  | 2  | 0  | 0  | 0  | 0  | 0  | 1  | 0  | 0  | 2  | 2  | 3  | 2  | 2  | 0  | 2  | 2  | 0  | 0  | 2  | 1  | 2  |   |
| ENSP00000370808                 | ENSG00000169100  | SLC25A6  | 397 | 25  | 9  | 7  | 6  | 20 | 16 | 13 | 8  | 9  | 5  | 25 | 14 | 11 | 8  | 11 | 11 | 12 | 20 | 12 | 18 | 18 | 11 | 23 | 14 | 11 | 21 | 10 | 6  | 13 | 10 |   |
| ENSP00000370817,ENSP00000370817 | ENSG00000178996  | SNX18    | 17  | 1   | 2  | 1  | 0  | 0  | 0  | 2  | 0  | 1  | 0  | 0  | 0  | 1  | 0  | 0  | 1  | 2  | 1  | 3  | 0  | 0  | 0  | 0  | 0  | 0  | 0  | 0  | 0  | 0  | 0  | 0 |
| ENSP00000370842                 | ENSG00000137033  | IL33     | 12  | 0   | 0  | 0  | 0  | 0  | 0  | 0  | 0  | 0  | 0  | 0  | 0  | 0  | 0  | 0  | 1  | 0  | 0  | 0  | 0  | 0  | 1  | 1  | 2  | 3  | 2  | 0  | 0  | 0  | 0  |   |
| ENSP00000370873                 | ENSG00000145247  | OCIAD2   | 33  | 0   | 0  | 0  | 0  | 2  | 1  | 4  | 0  | 1  | 0  | 1  | 1  | 0  | 0  | 1  | 0  | 1  | 1  | 0  | 0  | 1  | 1  | 1  | 2  | 0  | 3  | 4  | 3  | 1  | 3  | 1 |
| ENSP00000370882,ENSP00000370882 | ENSG00000109180  | OCIAD1   | 149 | 7</ |    |    |    |    |    |    |    |    |    |    |    |    |    |    |    |    |    |    |    |    |    |    |    |    |    |    |    |    |    |   |









|                                            |                 |     |    |    |    |    |    |    |    |    |    |    |    |    |    |    |    |    |    |    |    |    |    |    |    |    |    |    |    |    |    |    |
|--------------------------------------------|-----------------|-----|----|----|----|----|----|----|----|----|----|----|----|----|----|----|----|----|----|----|----|----|----|----|----|----|----|----|----|----|----|----|
| ENSP00000379572,ENSP000000:ENSG00000106066 | CPVL            | 23  | 3  | 5  | 2  | 0  | 1  | 2  | 0  | 0  | 0  | 0  | 0  | 0  | 3  | 0  | 1  | 0  | 1  | 2  | 1  | 0  | 1  | 0  | 0  | 0  | 0  | 0  | 0  | 0  | 1  |    |
| ENSP00000379597,ENSP000000:ENSG00000100243 | CYB5R3          | 244 | 8  | 13 | 2  | 5  | 6  | 8  | 9  | 5  | 14 | 1  | 5  | 5  | 7  | 2  | 9  | 10 | 8  | 8  | 10 | 7  | 14 | 7  | 8  | 13 | 5  | 12 | 13 | 6  | 18 | 6  |
| ENSP00000379602,ENSP000000:ENSG00000179036 |                 | 123 | 3  | 3  | 3  | 3  | 2  | 4  | 6  | 3  | 6  | 7  | 2  | 2  | 4  | 4  | 1  | 4  | 3  | 4  | 5  | 6  | 6  | 4  | 3  | 5  | 7  | 3  | 7  | 5  | 5  |    |
| ENSP00000379604                            | ENSG00000111305 | 25  | 1  | 0  | 1  | 0  | 0  | 0  | 1  | 1  | 1  | 0  | 0  | 0  | 1  | 1  | 1  | 0  | 1  | 3  | 1  | 1  | 2  | 0  | 2  | 2  | 1  | 1  | 0  | 1  | 1  |    |
| ENSP00000379625                            | ENSG00000172936 | 15  | 0  | 0  | 2  | 1  | 0  | 0  | 1  | 0  | 2  | 0  | 0  | 0  | 0  | 0  | 0  | 0  | 0  | 0  | 0  | 1  | 0  | 1  | 1  | 1  | 1  | 1  | 0  | 0  | 2  | 1  |
| ENSP00000379643,ENSP000000:ENSG00000072864 | NDE1            | 16  | 1  | 1  | 1  | 0  | 0  | 0  | 0  | 0  | 1  | 2  | 1  | 0  | 0  | 0  | 0  | 0  | 0  | 0  | 2  | 1  | 2  | 0  | 1  | 0  | 0  | 1  | 0  | 0  | 0  | 1  |
| ENSP00000379654,ENSP000000:ENSG00000166783 | KIAA0430        | 24  | 1  | 1  | 0  | 2  | 2  | 0  | 1  | 2  | 1  | 0  | 2  | 0  | 0  | 0  | 1  | 1  | 1  | 1  | 1  | 1  | 1  | 0  | 1  | 0  | 0  | 1  | 1  | 1  | 1  | 1  |
| ENSP00000379675,ENSP000000:ENSG00000129084 | PSMA1           | 267 | 6  | 7  | 9  | 7  | 11 | 8  | 9  | 9  | 10 | 7  | 6  | 4  | 5  | 13 | 6  | 7  | 9  | 7  | 8  | 15 | 10 | 8  | 11 | 5  | 16 | 15 | 9  | 14 | 6  | 10 |
| ENSP00000379731,ENSP000000:ENSG00000147604 | RPL7            | 151 | 6  | 3  | 4  | 0  | 4  | 5  | 5  | 3  | 2  | 5  | 4  | 4  | 5  | 4  | 5  | 9  | 6  | 4  | 8  | 4  | 2  | 3  | 5  | 8  | 10 | 12 | 7  | 7  | 2  |    |
| ENSP00000379734,ENSP000000:ENSG00000151327 | FAM177A1        | 45  | 3  | 0  | 5  | 2  | 3  | 1  | 2  | 3  | 1  | 0  | 0  | 1  | 2  | 3  | 3  | 0  | 0  | 0  | 3  | 5  | 2  | 3  | 0  | 0  | 1  | 0  | 1  | 0  | 1  | 0  |
| ENSP00000379760,ENSP000000:ENSG00000171490 | RSL1D1          | 419 | 12 | 9  | 13 | 4  | 15 | 10 | 7  | 16 | 8  | 21 | 18 | 12 | 10 | 19 | 11 | 11 | 21 | 11 | 8  | 18 | 16 | 20 | 15 | 16 | 9  | 10 | 27 | 19 | 18 |    |
| ENSP00000379767,ENSP000000:ENSG00000134056 | MRPS36          | 81  | 3  | 2  | 0  | 2  | 2  | 1  | 2  | 0  | 2  | 1  | 6  | 5  | 1  | 0  | 1  | 1  | 3  | 3  | 4  | 2  | 2  | 8  | 5  | 5  | 3  | 3  | 2  | 5  | 4  | 4  |
| ENSP00000379773,ENSP000000:ENSG00000122299 | ZC3H7A          | 11  | 0  | 0  | 1  | 0  | 1  | 0  | 0  | 0  | 1  | 0  | 0  | 0  | 1  | 1  | 0  | 0  | 0  | 0  | 1  | 1  | 0  | 0  | 0  | 0  | 1  | 0  | 0  | 0  | 1  | 1  |
| ENSP00000379778                            | ENSG00000110321 | 42  | 14 | 11 | 16 | 9  | 8  | 6  | 10 | 14 | 10 | 9  | 23 | 9  | 14 | 11 | 15 | 13 | 20 | 17 | 14 | 13 | 14 | 8  | 12 | 6  | 13 | 22 | 9  | 17 | 15 | 12 |
| ENSP00000379780                            | E1F4A1          | 905 | 47 | 23 | 29 | 17 | 40 | 23 | 28 | 11 | 16 | 11 | 36 | 18 | 29 | 26 | 27 | 38 | 33 | 27 | 21 | 49 | 23 | 18 | 33 | 17 | 55 | 47 | 29 | 37 | 50 | 47 |
| ENSP00000379805,ENSP000000:ENSG00000196683 | TOMM7           | 12  | 0  | 1  | 0  | 0  | 0  | 1  | 0  | 0  | 2  | 0  | 0  | 0  | 0  | 0  | 0  | 0  | 1  | 0  | 0  | 1  | 0  | 0  | 0  | 0  | 0  | 1  | 3  | 0  | 1  | 1  |
| ENSP00000379855,ENSP000000:ENSG00000145675 | PIK3R1          | 23  | 1  | 2  | 2  | 4  | 3  | 1  | 2  | 1  | 2  | 0  | 0  | 0  | 0  | 0  | 0  | 0  | 0  | 0  | 1  | 0  | 0  | 0  | 0  | 1  | 1  | 0  | 0  | 0  | 1  |    |







ENSP00000387085 ENSG00000204316 MRPL38  
ENSP00000387088,ENSP000003:ENSG00000143889 HNRPLL  
ENSP00000387095,ENSP000003:ENSG00000138078 PREPL  
ENSP00000387100 ENSG00000176058 C9orf75  
ENSP00000387101 ENSG00000115541 HSPF1  
251 ENSP00000387123,ENSP000003:ENSG00000164904 ALDH7A1  
ENSP00000387160,ENSP000003:ENSG00000055130 CUL1  
ENSP00000387165,ENSP000003:ENSG00000167202 TBC1D2B  
ENSP00000387175,ENSP000003:ENSG00000168883 USP39  
ENSP00000387176 ENSG00000222038 POTEJ  
ENSP00000387180 ENSG00000141378 PTRH2  
ENSP00000387257 ENSG00000144395 CCDC150  
ENSP00000387259,ENSP000003:ENSG00000091436 AC013461  
ENSP00000387261,ENSP000003:ENSG00000152229 PSTPIP2  
ENSP00000387282,ENSP000003:ENSG00000173744 AGFG1  
ENSP00000387286 ENSG00000138069 RAB1A  
ENSP00000387305,ENSP000003:ENSG00000163002 NUP35  
ENSP00000387311,ENSP000003:ENSG00000067066 SP100  
rev\_ENSP00000007510  
rev\_ENSP000000035307  
rev\_ENSP00000172853  
rev\_ENSP00000179765  
rev\_ENSP00000195419  
rev\_ENSP00000203616  
rev\_ENSP00000205386  
rev\_ENSP00000210444  
rev\_ENSP00000216832  
rev\_ENSP00000216951  
rev\_ENSP00000217905  
rev\_ENSP00000219084  
rev\_ENSP00000220419  
rev\_ENSP00000220496  
rev\_ENSP00000220959  
rev\_ENSP00000226207  
rev\_ENSP00000228284  
rev\_ENSP00000230340  
rev\_ENSP00000230902  
rev\_ENSP00000236925  
rev\_ENSP00000236995  
rev\_ENSP00000237724  
rev\_ENSP00000242848  
rev\_ENSP00000244020  
rev\_ENSP00000244364  
rev\_ENSP00000246043  
rev\_ENSP00000249367  
rev\_ENSP00000249837  
rev\_ENSP00000251472  
rev\_ENSP00000252050  
rev\_ENSP00000252477  
rev\_ENSP00000252597  
rev\_ENSP00000252889  
rev\_ENSP00000254821  
rev\_ENSP00000254898  
rev\_ENSP00000255194  
rev\_ENSP00000256458  
rev\_ENSP00000256707  
rev\_ENSP00000257287  
rev\_ENSP00000257626  
rev\_ENSP00000258530  
rev\_ENSP00000259335  
rev\_ENSP00000260147  
rev\_ENSP00000260766  
rev\_ENSP00000260777  
rev\_ENSP00000261172  
rev\_ENSP00000261383  
rev\_ENSP00000261424  
rev\_ENSP00000261435  
rev\_ENSP00000261535  
rev\_ENSP00000261606  
rev\_ENSP00000261812  
rev\_ENSP00000261833  
rev\_ENSP00000262112  
rev\_ENSP00000262209  
rev\_ENSP00000262360  
rev\_ENSP00000262367  
rev\_ENSP00000262410  
rev\_ENSP00000262429  
rev\_ENSP00000262442  
rev\_ENSP00000262963  
rev\_ENSP00000263062  
rev\_ENSP00000263103  
rev\_ENSP00000263174  
rev\_ENSP00000263273  
rev\_ENSP00000263441  
rev\_ENSP00000264229  
rev\_ENSP00000264331  
rev\_ENSP00000264346  
rev\_ENSP00000264501  
rev\_ENSP00000264546  
rev\_ENSP00000264555  
rev\_ENSP00000264661  
rev\_ENSP00000264779  
rev\_ENSP00000265012  
rev\_ENSP00000265018  
rev\_ENSP00000265348  
rev\_ENSP00000265368  
rev\_ENSP00000265662  
rev\_ENSP00000265753  
rev\_ENSP00000265986

|     |    |    |    |    |    |    |    |    |    |    |    |    |    |    |    |    |    |    |    |    |    |    |    |    |    |    |    |    |    |    |   |   |
|-----|----|----|----|----|----|----|----|----|----|----|----|----|----|----|----|----|----|----|----|----|----|----|----|----|----|----|----|----|----|----|---|---|
| 95  | 1  | 0  | 1  | 1  | 1  | 2  | 3  | 2  | 2  | 2  | 1  | 1  | 1  | 1  | 0  | 2  | 2  | 1  | 0  | 2  | 1  | 2  | 3  | 5  | 4  | 2  | 0  | 5  | 1  |    |   |   |
| 38  | 1  | 2  | 0  | 1  | 3  | 3  | 4  | 1  | 3  | 2  | 11 | 6  | 2  | 1  | 2  | 4  | 4  | 3  | 2  | 4  | 6  | 1  | 4  | 1  | 4  | 8  | 1  | 3  | 6  | 1  |   |   |
| 19  | 1  | 2  | 0  | 1  | 0  | 0  | 0  | 0  | 0  | 1  | 0  | 2  | 2  | 1  | 2  | 0  | 0  | 1  | 0  | 0  | 0  | 2  | 2  | 0  | 0  | 2  | 0  | 0  | 0  | 0  |   |   |
| 566 | 12 | 13 | 19 | 10 | 23 | 12 | 15 | 13 | 6  | 22 | 24 | 14 | 6  | 38 | 8  | 18 | 50 | 9  | 19 | 22 | 10 | 33 | 28 | 19 | 25 | 20 | 14 | 26 | 22 | 16 |   |   |
| 251 | 20 | 15 | 7  | 7  | 8  | 10 | 4  | 1  | 6  | 2  | 20 | 7  | 6  | 1  | 6  | 11 | 9  | 7  | 5  | 4  | 12 | 5  | 22 | 17 | 3  | 5  | 1  | 8  | 11 | 11 |   |   |
| 135 | 7  | 7  | 2  | 2  | 0  | 2  | 4  | 3  | 4  | 0  | 11 | 4  | 3  | 1  | 5  | 6  | 6  | 5  | 1  | 6  | 7  | 0  | 6  | 5  | 4  | 4  | 3  | 5  | 14 | 8  |   |   |
| 15  | 0  | 0  | 0  | 3  | 0  | 0  | 2  | 1  | 1  | 0  | 0  | 0  | 0  | 0  | 0  | 0  | 0  | 1  | 0  | 1  | 0  | 0  | 0  | 0  | 1  | 2  | 1  | 1  | 1  | 0  |   |   |
| 69  | 4  | 1  | 2  | 2  | 3  | 3  | 2  | 2  | 1  | 3  | 4  | 2  | 2  | 1  | 2  | 4  | 3  | 4  | 2  | 3  | 2  | 2  | 2  | 2  | 3  | 2  | 2  | 2  | 1  | 1  |   |   |
| 496 | 19 | 15 | 8  | 15 | 20 | 15 | 30 | 10 | 17 | 3  | 28 | 10 | 14 | 3  | 15 | 14 | 25 | 19 | 18 | 20 | 14 | 7  | 22 | 14 | 24 | 27 | 20 | 13 | 23 | 14 |   |   |
| 105 | 5  | 3  | 0  | 1  | 2  | 5  | 2  | 3  | 3  | 0  | 7  | 4  | 3  | 0  | 5  | 7  | 3  | 7  | 3  | 3  | 3  | 0  | 5  | 4  | 4  | 6  | 3  | 3  | 6  | 5  |   |   |
| 13  | 1  | 2  | 1  | 0  | 0  | 0  | 0  | 1  | 0  | 0  | 0  | 1  | 0  | 0  | 0  | 0  | 0  | 0  | 0  | 0  | 1  | 1  | 0  | 3  | 1  | 0  | 0  | 0  | 1  | 0  |   |   |
| 12  | 0  | 0  | 0  | 2  | 0  | 0  | 1  | 0  | 0  | 0  | 0  | 0  | 3  | 0  | 1  | 0  | 0  | 0  | 0  | 1  | 0  | 0  | 0  | 0  | 0  | 1  | 1  | 1  | 0  | 0  |   |   |
| 11  | 0  | 1  | 0  | 0  | 0  | 0  | 0  | 0  | 0  | 0  | 1  | 1  | 0  | 0  | 1  | 0  | 0  | 1  | 0  | 0  | 1  | 1  | 1  | 0  | 0  | 3  | 0  | 0  | 0  | 0  |   |   |
| 22  | 0  | 1  | 1  | 0  | 1  | 1  | 1  | 1  | 0  | 0  | 0  | 0  | 1  | 0  | 1  | 1  | 2  | 1  | 2  | 0  | 1  | 0  | 1  | 0  | 1  | 1  | 0  | 2  | 2  | 1  |   |   |
| 244 | 10 | 10 | 5  | 9  | 12 | 10 | 11 | 7  | 6  | 2  | 10 | 6  | 8  | 3  | 7  | 8  | 6  | 7  | 4  | 10 | 9  | 5  | 9  | 7  | 9  | 12 | 13 | 8  | 10 | 11 |   |   |
| 57  | 3  | 2  | 1  | 1  | 2  | 1  | 1  | 2  | 2  | 2  | 2  | 1  | 1  | 1  | 2  | 2  | 2  | 2  | 2  | 2  | 2  | 2  | 4  | 2  | 2  | 4  | 2  | 1  | 2  | 2  |   |   |
| 45  | 0  | 0  | 0  | 1  | 0  | 1  | 5  | 2  | 4  | 0  | 1  | 1  | 1  | 0  | 2  | 0  | 3  | 2  | 1  | 0  | 2  | 0  | 2  | 2  | 1  | 2  | 1  | 2  | 3  | 6  |   |   |
| 10  | 2  | 0  | 0  | 0  | 0  | 0  | 0  | 1  | 0  | 0  | 1  | 0  | 0  | 0  | 0  | 0  | 0  | 0  | 0  | 0  | 1  | 0  | 2  | 0  | 0  | 2  | 1  | 0  | 0  | 0  |   |   |
| 28  | 2  | 1  | 1  | 0  | 1  | 1  | 0  | 1  | 2  | 2  | 0  | 0  | 2  | 3  | 1  | 1  | 1  | 2  | 1  | 1  | 1  | 1  | 0  | 0  | 1  | 1  | 1  | 0  | 0  | 0  |   |   |
| 42  | 2  | 1  | 3  | 0  | 1  | 1  | 1  | 1  | 0  | 0  | 2  | 3  | 2  | 2  | 0  | 0  | 1  | 1  | 1  | 3  | 2  | 3  | 3  | 3  | 1  | 1  | 1  | 0  | 3  | 0  |   |   |
| 19  | 1  | 1  | 0  | 1  | 0  | 1  | 2  | 0  | 0  | 1  | 0  | 1  | 0  | 0  | 1  | 0  | 1  | 2  | 0  | 2  | 0  | 0  | 0  | 1  | 1  | 1  | 1  | 0  | 0  | 1  |   |   |
| 59  | 2  | 2  | 1  | 1  | 6  | 2  | 3  | 2  | 2  | 2  | 3  | 2  | 1  | 2  | 2  | 2  | 3  | 3  | 0  | 2  | 2  | 1  | 1  | 1  | 3  | 2  | 1  | 2  | 1  | 2  |   |   |
| 18  | 1  | 2  | 0  | 0  | 1  | 2  | 1  | 0  | 0  | 0  | 1  | 0  | 0  | 0  | 1  | 2  | 1  | 1  | 1  | 0  | 0  | 0  | 0  | 0  | 0  | 0  | 1  | 1  | 0  | 0  |   |   |
| 22  | 3  | 1  | 1  | 0  | 0  | 1  | 2  | 0  | 1  | 0  | 1  | 1  | 0  | 0  | 1  | 0  | 0  | 1  | 1  | 1  | 1  | 0  | 3  | 1  | 0  | 1  | 0  | 0  | 0  | 1  |   |   |
| 12  | 0  | 0  | 0  | 0  | 0  | 0  | 2  | 1  | 1  | 0  | 0  | 0  | 0  | 0  | 0  | 0  | 0  | 0  | 0  | 0  | 1  | 0  | 0  | 0  | 1  | 4  | 2  | 0  | 0  | 0  |   |   |
| 14  | 0  | 0  | 0  | 1  | 1  | 0  | 1  | 0  | 0  | 0  | 0  | 2  | 0  | 1  | 1  | 1  | 0  | 0  | 0  | 0  | 1  | 0  | 2  | 0  | 1  | 0  | 0  | 2  | 0  | 0  |   |   |
| 10  | 1  | 0  | 1  | 1  | 0  | 0  | 0  | 1  | 0  | 0  | 0  | 0  | 0  | 0  | 0  | 0  | 2  | 0  | 1  | 1  | 0  | 0  | 0  | 0  | 0  | 1  | 1  | 0  | 0  | 0  |   |   |
| 42  | 3  | 2  | 2  | 2  | 2  | 2  | 2  | 1  | 1  | 1  | 2  | 1  | 3  | 1  | 1  | 0  | 2  | 1  | 1  | 0  | 1  | 2  | 1  | 3  | 1  | 0  | 1  | 0  | 1  | 2  | 2 |   |
| 12  | 0  | 0  | 1  | 0  | 1  | 0  | 0  | 0  | 1  | 0  | 0  | 0  | 0  | 1  | 0  | 2  | 0  | 0  | 2  | 1  | 0  | 0  | 0  | 0  | 0  | 0  | 2  | 0  | 0  | 1  | 0 |   |
| 22  | 1  | 0  | 1  | 0  | 0  | 1  | 1  | 1  | 1  | 0  | 0  | 0  | 1  | 2  | 0  | 1  | 1  | 2  | 0  | 1  | 1  | 0  | 0  | 0  | 0  | 1  | 0  | 2  | 1  | 1  | 2 |   |
| 21  | 1  | 1  | 0  | 1  | 1  | 1  | 1  | 2  | 0  | 0  | 0  | 0  | 0  | 1  | 0  | 1  | 1  | 0  | 0  | 1  | 1  | 1  | 0  | 1  | 1  | 1  | 0  | 2  | 1  | 0  | 1 |   |
| 14  | 1  | 2  | 1  | 1  | 2  | 0  | 2  | 0  | 0  | 0  | 0  | 0  | 0  | 0  | 0  | 0  | 0  | 1  | 0  | 0  | 1  | 0  | 0  | 0  | 1  | 0  | 0  | 0  | 0  | 2  | 0 |   |
| 17  | 2  | 1  | 1  | 0  | 0  | 0  | 1  | 0  | 0  | 1  | 1  | 0  | 0  | 0  | 0  | 0  | 0  | 1  | 2  | 0  | 0  | 0  | 0  | 1  | 0  | 1  | 0  | 2  | 1  | 1  | 1 |   |
| 10  | 0  | 0  | 0  | 1  | 1  | 0  | 0  | 0  | 0  | 0  | 0  | 0  | 0  | 1  | 0  | 0  | 0  | 1  | 0  | 1  | 0  | 0  | 2  | 0  | 1  | 0  | 0  | 0  | 1  | 0  | 0 |   |
| 15  | 1  | 1  | 1  | 1  | 0  | 0  | 0  | 2  | 0  | 0  | 0  | 0  | 0  | 0  | 0  | 1  | 1  | 2  | 0  | 0  | 0  | 1  | 1  | 0  | 0  | 2  | 0  | 0  | 0  | 1  | 0 |   |
| 28  | 1  | 2  | 0  | 0  | 0  | 0  | 2  | 0  | 2  | 2  | 0  | 0  | 1  | 0  | 1  | 2  | 2  | 1  | 1  | 2  | 1  | 2  | 0  | 2  | 1  | 1  | 0  | 0  | 0  | 1  | 1 |   |
| 10  | 0  | 0  | 1  | 0  | 0  | 0  | 1  | 0  | 0  | 0  | 0  | 0  | 0  | 0  | 1  | 0  | 0  | 1  | 1  | 2  | 0  | 1  | 0  | 0  | 1  | 0  | 0  | 0  | 0  | 1  | 0 |   |
| 18  | 1  | 1  | 1  | 0  | 1  | 0  | 0  | 0  | 0  | 0  | 0  | 1  | 0  | 0  | 0  | 0  | 1  | 1  | 2  | 0  | 1  | 0  | 0  | 1  | 0  | 0  | 0  | 0  | 0  | 1  | 0 |   |
| 41  | 1  | 1  | 2  | 1  | 2  | 2  | 0  | 0  | 1  | 3  | 1  | 1  | 1  | 2  | 0  | 1  | 2  | 2  | 2  | 2  | 1  | 3  | 2  | 1  | 1  | 1  | 1  | 1  | 1  | 1  | 1 |   |
| 10  | 2  | 1  | 0  | 1  | 0  | 0  | 0  | 0  | 0  | 0  | 0  | 0  | 0  | 0  | 0  | 0  | 2  | 0  | 0  | 0  | 1  | 0  | 1  | 0  | 0  | 0  | 1  | 0  | 1  | 0  | 0 |   |
| 15  | 2  | 0  | 1  | 0  | 0  | 0  | 0  | 1  | 1  | 1  | 0  | 0  | 1  | 0  | 0  | 1  | 1  | 0  | 0  | 0  | 1  | 2  | 0  | 0  | 0  | 0  | 0  | 1  | 0  | 1  | 1 |   |
| 25  | 1  | 1  | 0  | 0  | 0  | 0  | 0  | 1  | 0  | 0  | 0  | 1  | 1  | 1  | 1  | 0  | 0  | 3  | 2  | 1  | 0  | 1  | 0  | 0  | 2  | 2  | 3  | 0  | 0  | 1  | 3 |   |
| 11  | 1  | 0  | 0  | 0  | 0  | 0  | 0  | 0  | 0  | 0  | 1  | 0  | 0  | 0  | 0  | 0  | 0  | 1  | 1  | 1  | 2  | 0  | 0  | 0  | 1  | 0  | 1  | 0  | 0  | 0  | 1 |   |
| 43  | 2  | 2  | 0  | 4  | 1  | 1  | 6  | 0  | 0  | 1  | 2  | 0  | 0  | 0  | 1  | 0  | 2  | 3  | 0  | 4  | 2  | 0  | 1  | 3  | 1  | 1  | 1  | 0  | 0  | 2  | 2 |   |
| 22  | 1  | 0  | 0  | 0  | 0  | 1  | 0  | 0  | 2  | 0  | 0  | 0  | 0  | 0  | 0  | 2  | 0  | 0  | 3  | 0  | 1  | 0  | 2  | 1  | 2  | 2  | 1  | 1  | 1  | 1  | 1 |   |
| 33  | 3  | 1  | 2  | 2  | 1  | 2  | 1  | 1  | 0  | 0  | 0  | 0  | 0  | 0  | 1  | 0  | 0  | 0  | 2  | 2  | 3  | 2  | 1  | 2  | 0  | 1  | 2  | 0  | 2  | 1  | 1 |   |
| 30  | 0  | 0  | 0  | 0  | 0  | 1  | 2  | 0  | 1  | 1  | 6  | 0  | 1  | 1  | 2  | 0  | 0  | 3  | 2  | 1  | 3  | 0  | 0  | 1  | 0  | 0  | 2  | 0  | 2  | 1  | 1 |   |
| 22  | 2  | 1  | 0  | 1  | 0  | 1  | 1  | 1  | 1  | 0  | 0  | 0  | 0  | 0  | 2  | 0  | 0  | 2  | 1  | 0  | 1  | 0  | 1  | 0  | 1  | 0  | 1  | 1  | 1  | 0  | 2 |   |
| 30  | 1  | 2  | 0  | 0  | 0  | 1  | 0  | 0  | 3  | 0  | 1  | 0  | 0  | 0  | 0  | 2  | 0  | 2  | 3  | 1  | 1  | 3  | 0  | 3  | 1  | 0  | 1  | 1  | 0  | 2  | 2 |   |
| 14  | 1  | 1  | 0  | 0  | 0  | 1  | 0  | 0  | 0  | 0  | 0  | 0  | 0  | 0  | 2  | 0  | 0  | 0  | 0  | 0  | 0  | 1  | 0  | 3  | 1  | 2  | 2  | 0  | 0  | 0  | 0 |   |
| 10  | 0  | 2  | 0  | 1  | 1  | 0  | 0  | 0  | 0  | 0  | 0  | 1  | 0  | 1  | 0  | 1  | 0  | 0  | 1  | 0  | 0  | 1  | 0  | 0  | 0  | 0  | 0  | 0  | 0  | 1  | 0 |   |
| 23  | 2  | 1  | 0  | 1  | 0  | 1  | 1  | 0  | 0  | 2  | 1  | 1  | 2  | 2  | 0  | 0  | 0  | 0  | 1  | 0  | 0  | 0  | 1  | 0  | 1  | 0  | 0  | 1  | 1  | 2  | 1 | 1 |
| 16  | 0  | 0  | 0  | 1  | 2  | 1  | 1  | 0  | 0  | 1  | 1  | 1  | 0  | 0  | 0  | 0  | 1  | 0  | 0  | 0  | 0  | 1  | 0  | 2  | 1  | 1  | 1  | 0  | 0  | 0  | 1 |   |
| 12  | 1  | 1  | 2  | 0  | 1  | 0  | 1  | 0  | 0  | 0  | 0  | 0  | 0  | 0  | 0  | 1  | 0  | 1  | 1  | 2  | 0  | 0  | 0  | 1  | 0  | 0  | 0  | 0  | 0  | 0  | 0 |   |
| 14  | 2  | 1  | 1  | 0  | 1  | 0  | 0  | 0  | 0  | 0  | 1  | 0  | 0  | 0  | 0  | 2  | 0  | 1  | 0  | 1  | 0  | 0  | 0  | 1  | 0  | 0  | 0  | 0  | 0  | 1  | 0 |   |
| 12  | 0  | 0  | 0  | 0  | 0  | 0  | 0  | 1  | 1  | 0  | 1  | 1  | 2  | 0  | 0  | 0  | 1  | 0  | 1  | 1  | 0  | 1  | 0  | 0  | 0  | 0  | 1  | 1  | 0  | 0  | 0 |   |
| 12  | 0  | 0  | 0  | 2  | 1  | 2  | 0  | 0  | 0  | 0  | 0  | 0  | 0  | 1  | 3  | 0  | 0  | 0  | 0  | 1  | 1  | 0  | 0  | 0  | 0  | 0  | 0  | 0  | 1  | 0  | 0 |   |
| 12  | 1  | 0  | 0  | 1  | 0  | 1  | 1  | 0  | 0  | 0  | 0  | 0  | 0  | 0  | 0  | 1  | 0  | 0  | 1  | 0  | 0  | 0  | 0  | 0  | 0  | 1  | 1  | 2  | 0  | 0  | 0 |   |
| 10  | 0  | 0  | 0  | 1  | 0  | 0  | 1  | 0  | 0  | 0  | 1  | 0  | 0  | 0  | 0  | 0  | 0  | 1  | 1  | 1  | 1  | 2  | 0  | 0  | 0  | 0  | 0  | 0  | 0  | 0  | 0 |   |
| 10  | 1  | 0  | 0  | 0  | 0  | 0  | 0  | 0  | 2  | 0  | 2  | 0  | 0  | 0  | 0  | 0  | 1  | 0  | 2  | 1  | 0  | 0  | 1  | 0  | 0  | 0  | 0  | 0  | 0  | 0  | 0 |   |
| 10  | 0  | 0  | 1  | 0  | 1  | 0  | 0  | 0  | 0  | 1  | 0  | 0  | 0  | 0  | 0  | 0  | 1  | 0  | 1  | 1  | 1  | 0  | 0  | 0  | 0  | 0  | 0  | 0  | 0  | 1  | 0 | 1 |
| 19  | 1  | 1  | 1  | 1  | 0  | 1  | 1  | 1  | 0  | 1  | 0  | 0  | 0  | 1  | 0  | 0  | 0  | 1  | 1  | 1  | 1  | 1  | 2  | 0  | 0  | 0  | 0  | 2  | 0  | 1  | 0 |   |
| 10  | 0  | 1  | 0  | 0  | 0  | 0  | 0  | 0  | 0  | 0  | 0  | 0  | 0  | 0  | 0  | 0  | 0  | 0  | 1  | 3  | 0  | 1  | 2  | 1  | 1  | 0  | 0  | 0  | 0  | 0  | 0 |   |
| 12  | 0  | 0  | 0  | 1  | 0  | 1  |    |    |    |    |    |    |    |    |    |    |    |    |    |    |    |    |    |    |    |    |    |    |    |    |   |   |

|                     |    |   |   |   |   |   |   |   |   |   |   |   |   |   |   |   |   |   |   |   |   |   |   |   |   |   |   |   |   |   |   |   |   |
|---------------------|----|---|---|---|---|---|---|---|---|---|---|---|---|---|---|---|---|---|---|---|---|---|---|---|---|---|---|---|---|---|---|---|---|
| rev_ENSP00000266022 | 14 | 2 | 1 | 0 | 0 | 1 | 0 | 1 | 0 | 0 | 0 | 1 | 0 | 1 | 0 | 0 | 0 | 0 | 0 | 2 | 0 | 1 | 0 | 0 | 0 | 0 | 1 | 1 | 1 | 1 | 0 | 0 |   |
| rev_ENSP00000266066 | 24 | 2 | 0 | 0 | 0 | 2 | 1 | 2 | 0 | 0 | 0 | 0 | 0 | 0 | 1 | 0 | 2 | 1 | 1 | 0 | 1 | 1 | 2 | 0 | 1 | 0 | 1 | 1 | 1 | 1 | 1 | 2 |   |
| rev_ENSP00000266070 | 18 | 1 | 0 | 0 | 1 | 2 | 0 | 1 | 0 | 1 | 0 | 0 | 1 | 1 | 0 | 0 | 0 | 0 | 1 | 1 | 1 | 2 | 0 | 0 | 3 | 0 | 0 | 0 | 0 | 1 | 1 | 0 |   |
| rev_ENSP00000266546 | 25 | 1 | 1 | 0 | 1 | 0 | 1 | 0 | 2 | 0 | 0 | 0 | 0 | 0 | 0 | 1 | 0 | 0 | 1 | 1 | 0 | 2 | 4 | 6 | 0 | 0 | 1 | 1 | 0 | 0 | 2 |   |   |
| rev_ENSP00000268679 | 23 | 2 | 1 | 0 | 1 | 0 | 0 | 2 | 0 | 1 | 0 | 0 | 1 | 0 | 0 | 1 | 0 | 1 | 1 | 2 | 1 | 1 | 0 | 1 | 0 | 1 | 0 | 1 | 0 | 1 | 1 |   |   |
| rev_ENSP00000269064 | 14 | 0 | 0 | 0 | 0 | 1 | 0 | 1 | 3 | 1 | 0 | 0 | 0 | 0 | 0 | 0 | 1 | 0 | 0 | 0 | 2 | 0 | 2 | 0 | 0 | 2 | 0 | 0 | 1 | 0 | 0 |   |   |
| rev_ENSP00000271636 | 11 | 0 | 0 | 0 | 0 | 0 | 1 | 1 | 1 | 1 | 1 | 0 | 0 | 0 | 0 | 1 | 0 | 0 | 1 | 0 | 0 | 0 | 0 | 0 | 1 | 2 | 0 | 1 | 0 | 0 | 0 |   |   |
| rev_ENSP00000272797 | 11 | 0 | 0 | 0 | 1 | 0 | 0 | 0 | 0 | 0 | 0 | 0 | 2 | 0 | 1 | 1 | 0 | 1 | 1 | 1 | 0 | 1 | 0 | 1 | 0 | 0 | 0 | 0 | 0 | 0 | 1 |   |   |
| rev_ENSP00000273176 | 12 | 1 | 0 | 0 | 0 | 1 | 0 | 1 | 0 | 0 | 0 | 0 | 0 | 0 | 0 | 1 | 0 | 0 | 0 | 2 | 0 | 0 | 0 | 0 | 0 | 0 | 1 | 0 | 1 | 2 | 0 | 0 |   |
| rev_ENSP00000273600 | 60 | 0 | 1 | 2 | 2 | 3 | 3 | 2 | 4 | 2 | 0 | 1 | 3 | 1 | 3 | 2 | 1 | 2 | 2 | 4 | 3 | 3 | 1 | 1 | 1 | 5 | 0 | 3 | 2 | 1 | 2 |   |   |
| rev_ENSP00000274289 | 16 | 0 | 0 | 0 | 1 | 2 | 1 | 0 | 0 | 0 | 1 | 0 | 0 | 0 | 0 | 0 | 1 | 0 | 0 | 1 | 1 | 1 | 0 | 0 | 1 | 1 | 2 | 1 | 1 | 1 | 0 |   |   |
| rev_ENSP00000275230 | 11 | 0 | 1 | 0 | 0 | 1 | 0 | 1 | 0 | 2 | 0 | 0 | 1 | 0 | 0 | 0 | 0 | 1 | 0 | 0 | 0 | 0 | 0 | 0 | 0 | 0 | 2 | 0 | 1 | 0 | 0 | 1 |   |
| rev_ENSP00000275699 | 21 | 2 | 1 | 0 | 1 | 1 | 0 | 0 | 1 | 1 | 0 | 0 | 1 | 1 | 0 | 1 | 0 | 2 | 1 | 2 | 2 | 0 | 0 | 1 | 0 | 1 | 1 | 0 | 1 | 0 | 0 | 0 |   |
| rev_ENSP00000277315 | 34 | 2 | 0 | 0 | 2 | 2 | 2 | 2 | 0 | 0 | 0 | 1 | 0 | 1 | 1 | 2 | 4 | 1 | 2 | 1 | 1 | 1 | 1 | 2 | 1 | 0 | 1 | 0 | 0 | 2 | 2 |   |   |
| rev_ENSP00000278935 | 11 | 2 | 0 | 0 | 0 | 0 | 1 | 0 | 0 | 0 | 1 | 0 | 1 | 0 | 0 | 0 | 0 | 1 | 1 | 0 | 1 | 0 | 1 | 0 | 1 | 0 | 1 | 0 | 0 | 0 | 0 | 0 |   |
| rev_ENSP00000279873 | 50 | 2 | 2 | 3 | 2 | 1 | 1 | 2 | 3 | 1 | 1 | 2 | 2 | 2 | 0 | 2 | 0 | 2 | 3 | 3 | 2 | 1 | 2 | 2 | 1 | 1 | 1 | 1 | 1 | 1 | 2 | 2 |   |
| rev_ENSP00000281445 | 15 | 1 | 0 | 0 | 1 | 0 | 1 | 1 | 0 | 1 | 0 | 2 | 1 | 0 | 0 | 1 | 0 | 0 | 1 | 1 | 0 | 1 | 0 | 0 | 0 | 0 | 0 | 1 | 1 | 0 | 0 | 1 |   |
| rev_ENSP00000281578 | 45 | 1 | 0 | 2 | 0 | 4 | 0 | 3 | 2 | 1 | 0 | 0 | 0 | 2 | 1 | 2 | 3 | 1 | 1 | 1 | 6 | 2 | 0 | 1 | 1 | 1 | 1 | 2 | 3 | 2 | 2 |   |   |
| rev_ENSP00000281923 | 10 | 1 | 1 | 0 | 0 | 0 | 0 | 0 | 0 | 0 | 1 | 1 | 0 | 0 | 0 | 1 | 0 | 0 | 0 | 2 | 0 | 0 | 0 | 1 | 0 | 1 | 0 | 0 | 0 | 0 | 1 | 0 |   |
| rev_ENSP00000282030 | 10 | 0 | 1 | 0 | 0 | 0 | 0 | 0 | 0 | 0 | 0 | 0 | 0 | 1 | 1 | 0 | 0 | 1 | 0 | 0 | 1 | 1 | 1 | 0 | 0 | 1 | 0 | 0 | 0 | 0 | 0 | 0 |   |
| rev_ENSP00000282096 | 12 | 1 | 1 | 0 | 2 | 0 | 0 | 2 | 0 | 0 | 0 | 1 | 0 | 0 | 0 | 0 | 0 | 0 | 1 | 0 | 0 | 2 | 0 | 1 | 0 | 0 | 0 | 0 | 0 | 0 | 0 | 1 |   |
| rev_ENSP00000282469 | 23 | 0 | 1 | 0 | 0 | 1 | 2 | 1 | 0 | 0 | 0 | 1 | 1 | 0 | 0 | 0 | 1 | 2 | 3 | 0 | 1 | 1 | 0 | 1 | 2 | 2 | 1 | 1 | 0 | 0 | 0 | 1 |   |
| rev_ENSP00000286104 | 39 | 3 | 2 | 1 | 1 | 0 | 0 | 3 | 1 | 1 | 2 | 1 | 1 | 2 | 3 | 4 | 2 | 1 | 0 | 1 | 1 | 0 | 1 | 1 | 0 | 2 | 1 | 1 | 2 | 0 | 1 | 0 |   |
| rev_ENSP00000286398 | 11 | 0 | 0 | 0 | 0 | 0 | 0 | 0 | 0 | 1 | 0 | 0 | 0 | 0 | 1 | 1 | 0 | 2 | 0 | 0 | 0 | 1 | 2 | 1 | 0 | 0 | 0 | 0 | 1 | 0 | 1 | 0 |   |
| rev_ENSP00000287936 | 10 | 1 | 0 | 0 | 0 | 1 | 0 | 1 | 0 | 1 | 0 | 1 | 0 | 1 | 0 | 0 | 0 | 1 | 0 | 0 | 1 | 0 | 0 | 0 | 0 | 0 | 0 | 0 | 0 | 1 | 0 | 1 | 0 |
| rev_ENSP00000289893 | 10 | 0 | 0 | 0 | 0 | 1 | 1 | 0 | 0 | 0 | 0 | 2 | 0 | 0 | 0 | 0 | 0 | 0 | 0 | 0 | 0 | 1 | 1 | 1 | 0 | 0 | 0 | 0 | 1 | 1 | 0 | 0 | 0 |
| rev_ENSP00000292205 | 11 | 3 | 0 | 0 | 0 | 0 | 0 | 0 | 1 | 0 | 0 | 0 | 0 | 0 | 0 | 1 | 0 | 1 | 0 | 1 | 0 | 1 | 1 | 0 | 1 | 0 | 0 | 0 | 0 | 0 | 1 | 0 | 0 |
| rev_ENSP00000293709 | 55 | 1 | 1 | 2 | 2 | 2 | 2 | 2 | 1 | 1 | 1 | 3 | 3 | 2 | 2 | 2 | 2 | 2 | 2 | 3 | 1 | 1 | 2 | 3 | 2 | 2 | 1 | 2 | 2 | 2 | 1 | 0 | 0 |
| rev_ENSP00000294671 | 10 | 0 | 0 | 0 | 0 | 0 | 1 | 0 | 2 | 0 | 0 | 0 | 0 | 0 | 0 | 1 | 0 | 1 | 0 | 1 | 1 | 0 | 1 | 0 | 1 | 0 | 0 | 0 | 0 | 1 | 0 | 1 | 0 |
| rev_ENSP00000295824 | 10 | 0 | 0 | 1 | 0 | 0 | 0 | 1 | 0 | 0 | 0 | 0 | 0 | 1 | 3 | 0 | 1 | 0 | 1 | 0 | 0 | 0 | 0 | 1 | 1 | 0 | 0 | 0 | 0 | 0 | 0 | 0 | 0 |
| rev_ENSP00000295888 | 17 | 2 | 0 | 3 | 0 | 0 | 0 | 0 | 1 | 0 | 1 | 1 | 1 | 1 | 0 | 1 | 0 | 0 | 1 | 1 | 1 | 1 | 0 | 0 | 1 | 0 | 0 | 1 | 0 | 0 | 0 | 0 | 0 |
| rev_ENSP00000296721 | 21 | 2 | 0 | 0 | 1 | 1 | 0 | 1 | 1 | 0 | 1 | 0 | 1 | 0 | 1 | 1 | 0 | 0 | 0 | 1 | 2 | 0 | 3 | 2 | 1 | 0 | 0 | 0 | 1 | 0 | 1 | 0 | 1 |
| rev_ENSP00000297404 | 13 | 1 | 0 | 1 | 1 | 0 | 1 | 0 | 0 | 1 | 0 | 0 | 0 | 0 | 1 | 1 | 0 | 0 | 1 | 1 | 0 | 0 | 1 | 0 | 0 | 1 | 1 | 0 | 0 | 0 | 0 | 0 | 1 |
| rev_ENSP00000297814 | 10 | 0 | 1 | 0 | 0 | 1 | 2 | 0 | 0 | 0 | 0 | 0 | 1 | 0 | 0 | 0 | 0 | 0 | 0 | 0 | 0 | 0 | 1 | 1 | 0 | 0 | 0 | 0 | 0 | 0 | 1 | 1 | 0 |
| rev_ENSP00000297826 | 17 | 1 | 1 | 2 | 1 | 1 | 1 | 2 | 2 | 0 | 0 | 0 | 0 | 0 | 0 | 0 | 2 | 2 | 1 | 1 | 0 | 0 | 0 | 0 | 0 | 0 | 0 | 0 | 0 | 0 | 0 | 0 | 0 |
| rev_ENSP00000299183 | 10 | 0 | 0 | 1 | 0 | 1 | 1 | 0 | 0 | 0 | 0 | 0 | 0 | 1 | 1 | 0 | 0 | 1 | 0 | 1 | 0 | 0 | 0 | 1 | 0 | 1 | 0 | 0 | 1 | 0 | 0 | 1 | 0 |
| rev_ENSP00000300053 | 30 | 0 | 0 | 0 | 2 | 2 | 0 | 2 | 4 | 3 | 0 | 3 | 0 | 2 | 1 | 1 | 0 | 1 | 0 | 0 | 1 | 0 | 2 | 4 | 1 | 0 | 1 | 0 | 0 | 0 | 0 | 0 | 0 |
| rev_ENSP00000300055 | 20 | 0 | 1 | 0 | 1 | 0 | 0 | 1 | 0 | 2 | 0 | 0 | 0 | 0 | 0 | 1 | 0 | 0 | 1 | 1 | 0 | 0 | 0 | 0 | 1 | 4 | 3 | 2 | 1 | 0 | 1 | 0 | 0 |
| rev_ENSP00000300231 | 28 | 0 | 0 | 1 | 1 | 4 | 1 | 4 | 0 | 0 | 1 | 1 | 0 | 2 | 0 | 0 | 1 | 1 | 0 | 2 | 2 | 0 | 0 | 0 | 0 | 0 | 1 | 2 | 1 | 2 | 1 | 0 | 0 |
| rev_ENSP00000300671 | 11 | 0 | 2 | 0 | 0 | 1 | 0 | 1 | 0 | 1 | 0 | 2 | 0 | 1 | 0 | 0 | 0 | 0 | 1 | 1 | 0 | 0 | 0 | 0 | 0 | 0 | 0 | 0 | 0 | 0 | 1 | 0 | 0 |
| rev_ENSP00000301607 | 10 | 1 | 0 | 0 | 0 | 0 | 0 | 0 | 0 | 0 | 0 | 0 | 1 | 1 | 0 | 0 | 0 | 0 | 0 | 0 | 0 | 1 | 1 | 0 | 0 | 0 | 0 | 0 | 1 | 2 | 0 | 1 | 1 |
| rev_ENSP00000301807 | 15 | 0 | 1 | 0 | 0 | 0 | 0 | 2 | 0 | 1 | 0 | 0 | 0 | 1 | 1 | 1 | 0 | 1 | 0 | 0 | 2 | 2 | 0 | 0 | 0 | 0 | 0 | 2 | 0 | 0 | 0 | 0 | 1 |
| rev_ENSP00000301885 | 29 | 3 | 1 | 0 | 0 | 3 | 2 | 0 | 1 | 2 | 0 | 0 | 0 | 0 | 1 | 1 | 0 | 1 | 2 | 1 | 2 | 1 | 2 | 0 | 0 | 1 | 1 | 1 | 0 | 2 | 1 | 0 | 0 |
| rev_ENSP00000302028 | 10 | 0 | 2 | 1 | 0 | 0 | 0 | 0 | 0 | 1 | 0 | 3 | 0 | 0 | 0 | 1 | 0 | 0 | 0 | 0 | 0 | 0 | 0 | 0 | 1 | 0 | 0 | 0 | 0 | 0 | 0 | 0 | 1 |
| rev_ENSP00000303585 | 16 | 1 | 0 | 0 | 0 | 0 | 0 | 1 | 2 | 0 | 0 | 0 | 1 | 1 | 0 | 0 | 0 | 1 | 1 | 0 | 1 | 1 | 1 | 0 | 0 | 0 | 1 | 1 | 0 | 2 | 1 | 0 | 0 |
| rev_ENSP00000304669 | 13 | 0 | 0 | 0 | 0 | 0 | 0 | 1 | 0 | 0 | 0 | 3 | 0 | 0 | 0 | 0 | 1 | 0 | 0 | 0 | 0 | 1 | 1 | 0 | 0 | 0 | 0 | 2 | 1 | 1 | 0 | 2 | 0 |
| rev_ENSP00000305465 | 18 | 3 | 1 | 2 | 0 | 0 | 0 | 0 | 0 | 0 | 1 | 0 | 0 | 0 | 0 | 1 | 1 | 0 | 0 | 0 | 0 | 2 | 0 | 1 | 2 | 0 | 0 | 1 | 0 | 1 | 1 | 1 | 0 |
| rev_ENSP00000305899 | 15 | 1 | 0 | 1 | 0 | 1 | 0 | 0 | 0 | 0 | 3 | 1 | 0 | 0 | 0 | 0 | 0 | 1 | 1 | 0 | 0 | 0 | 0 | 1 | 1 | 0 | 0 | 0 | 1 | 0 | 2 | 1 | 0 |
| rev_ENSP00000306141 | 25 | 2 | 1 | 2 | 0 | 1 | 0 | 0 | 0 | 1 | 0 | 0 | 1 | 1 | 2 | 0 | 0 | 0 | 0 | 2 | 2 | 0 | 2 | 2 | 0 | 2 | 2 | 1 | 1 | 1 | 0 | 1 | 1 |
| rev_ENSP00000306473 | 10 | 1 | 0 | 0 | 0 | 0 | 0 | 1 | 0 | 0 | 0 | 0 | 1 | 0 | 0 | 1 | 0 | 0 | 2 | 0 | 0 | 0 | 0 | 0 | 1 | 1 | 0 | 0 | 0 | 1 | 0 | 0 | 0 |
| rev_ENSP00000306898 | 11 | 1 | 0 | 0 | 0 | 1 | 2 | 0 | 0 | 0 | 0 | 0 | 0 | 1 | 1 | 1 | 0 | 0 | 0 | 0 | 1 | 0 | 0 | 2 | 0 | 1 | 0 | 0 | 0 | 0 | 0 | 0 | 0 |
| rev_ENSP00000306940 | 29 | 1 | 1 | 1 | 0 | 1 | 1 | 1 | 2 | 0 | 0 | 0 | 0 | 0 | 1 | 1 | 2 | 1 | 2 | 2 | 1 | 2 | 0 | 2 | 0 | 1 | 1 | 1 | 2 | 1 | 0 | 1 | 0 |
| rev_ENSP00000307208 | 11 | 0 | 0 | 0 | 0 | 0 | 0 | 0 | 0 | 1 | 2 | 1 | 0 | 0 | 0 | 0 | 1 | 2 | 0 | 0 | 0 | 0 | 1 | 0 | 1 | 0 | 0 | 0 | 0 | 0 | 0 | 1 | 1 |
| rev_ENSP00000307567 | 29 | 3 | 0 | 0 | 0 | 2 | 2 | 0 | 2 | 0 | 0 | 2 | 1 | 1 | 1 | 4 | 1 | 0 | 0 | 0 | 0 | 1 | 1 | 0 | 1 | 0 | 0 | 0 | 2 | 2 | 1 | 1 | 1 |
| rev_ENSP00000307928 | 10 | 0 | 0 | 0 | 0 | 0 | 0 | 1 | 1 | 0 | 1 | 0 | 0 | 0 | 1 | 0 | 0 | 0 | 1 | 0 | 0 | 0 | 0 | 0 | 0 | 0 | 0 | 1 | 1 | 0 | 1 | 0 | 0 |
| rev_ENSP00000307939 | 23 | 1 | 1 | 0 | 1 | 0 | 2 | 1 | 0 | 0 | 0 | 1 | 2 | 0 | 0 | 2 | 1 | 0 | 2 | 1 | 1 | 1 | 1 | 0 | 1 | 1 | 0 | 0 | 0 | 0 | 2 | 2 | 0 |
| rev_ENSP00000308021 | 15 | 0 | 1 | 0 | 1 | 1 | 0 | 1 | 0 | 1 | 0 | 1 | 0 | 0 | 1 | 0 | 2 |   |   |   |   |   |   |   |   |   |   |   |   |   |   |   |   |

|    |   |   |   |   |   |   |   |   |   |   |   |   |   |   |   |   |   |   |   |   |   |   |   |   |   |   |   |
|----|---|---|---|---|---|---|---|---|---|---|---|---|---|---|---|---|---|---|---|---|---|---|---|---|---|---|---|
| 10 | 0 | 1 | 0 | 0 | 0 | 0 | 0 | 1 | 0 | 0 | 0 | 0 | 0 | 0 | 0 | 0 | 0 | 0 | 1 | 0 | 7 | 0 | 0 | 0 | 0 | 0 |   |
| 11 | 2 | 0 | 1 | 0 | 2 | 1 | 0 | 0 | 0 | 0 | 1 | 0 | 0 | 0 | 0 | 0 | 0 | 0 | 1 | 0 | 1 | 1 | 1 | 0 | 0 | 0 |   |
| 28 | 0 | 1 | 1 | 1 | 1 | 0 | 0 | 1 | 0 | 1 | 0 | 0 | 1 | 4 | 1 | 4 | 3 | 1 | 1 | 1 | 2 | 0 | 0 | 0 | 3 | 0 | 0 |
| 10 | 0 | 2 | 1 | 0 | 0 | 0 | 0 | 0 | 0 | 0 | 0 | 0 | 0 | 0 | 0 | 0 | 0 | 0 | 0 | 0 | 7 | 0 | 0 | 0 | 0 | 0 |   |
| 10 | 0 | 0 | 1 | 0 | 1 | 0 | 1 | 0 | 1 | 0 | 0 | 1 | 0 | 0 | 0 | 1 | 0 | 0 | 1 | 0 | 0 | 1 | 0 | 1 | 1 | 1 |   |
| 10 | 0 | 0 | 0 | 0 | 1 | 0 | 1 | 0 | 0 | 0 | 0 | 0 | 1 | 0 | 1 | 1 | 0 | 0 | 0 | 0 | 0 | 1 | 0 | 1 | 0 | 1 |   |
| 66 | 3 | 3 | 1 | 3 | 0 | 3 | 2 | 3 | 4 | 0 | 1 | 0 | 0 | 4 | 0 | 6 | 4 | 3 | 1 | 3 | 1 | 4 | 2 | 4 | 3 | 3 | 2 |
| 10 | 0 | 1 | 0 | 0 | 0 | 0 | 0 | 1 | 1 | 0 | 0 | 2 | 1 | 0 | 0 | 0 | 0 | 0 | 1 | 0 | 0 | 3 | 0 | 0 | 0 | 0 |   |
| 47 | 2 | 1 | 1 | 2 | 2 | 0 | 2 | 0 | 1 | 1 | 1 | 1 | 0 | 2 | 1 | 1 | 1 | 2 | 1 | 4 | 2 | 3 | 1 | 2 | 2 | 2 | 3 |
| 27 | 2 | 2 | 0 | 0 | 2 | 2 | 0 | 0 | 0 | 0 | 1 | 0 | 0 | 2 | 1 | 0 | 1 | 1 | 1 | 2 | 0 | 0 | 1 | 3 | 2 | 1 | 1 |
| 30 | 1 | 1 | 1 | 0 | 2 | 0 | 0 | 1 | 0 | 1 | 2 | 2 | 0 | 0 | 0 | 1 | 0 | 2 | 1 | 0 | 3 | 1 | 1 | 1 | 1 | 2 | 2 |
| 11 | 1 | 0 | 0 | 0 | 0 | 2 | 0 | 0 | 1 | 0 | 2 | 0 | 0 | 0 | 0 | 0 | 1 | 0 | 0 | 0 | 1 | 0 | 0 | 0 | 0 | 2 |   |
| 19 | 0 | 0 | 0 | 0 | 1 | 1 | 2 | 0 | 0 | 1 | 0 | 1 | 0 | 1 | 0 | 6 | 1 | 0 | 0 | 0 | 0 | 3 | 0 | 3 | 0 | 0 | 0 |
| 12 | 0 | 0 | 1 | 1 | 1 | 0 | 1 | 0 | 0 | 0 | 0 | 0 | 0 | 0 | 0 | 0 | 1 | 0 | 0 | 2 | 0 | 1 | 0 | 0 | 1 | 1 |   |
| 14 | 1 | 1 | 0 | 0 | 0 | 2 | 1 | 0 | 1 | 0 | 0 | 0 | 1 | 0 | 1 | 0 | 0 | 1 | 0 | 1 | 2 | 0 | 1 | 0 | 1 | 0 |   |
| 68 | 3 | 3 | 1 | 3 | 0 | 3 | 2 | 3 | 4 | 0 | 1 | 0 | 0 | 4 | 0 | 6 | 4 | 3 | 1 | 3 | 1 | 4 | 2 | 4 | 3 | 3 | 3 |
| 16 | 1 | 0 | 0 | 0 | 0 | 1 | 0 | 0 | 0 | 1 | 0 | 0 | 0 | 1 | 0 | 1 | 1 | 1 | 0 | 0 | 2 | 2 | 1 | 1 | 0 | 1 |   |
| 36 | 1 | 1 | 1 | 2 | 5 | 0 | 2 | 2 | 1 | 0 | 3 | 0 | 1 | 0 | 3 | 0 | 1 | 1 | 0 | 3 | 0 | 2 | 1 | 2 | 1 | 0 | 1 |
| 11 | 2 | 0 | 0 | 0 | 1 | 1 | 0 | 0 | 1 | 0 | 1 | 0 | 0 | 0 | 1 | 0 | 0 | 0 | 0 | 0 | 0 | 1 | 0 | 1 | 0 | 0 |   |
| 22 | 2 | 0 | 1 | 0 | 1 | 0 | 0 | 0 | 0 | 0 | 0 | 0 | 1 | 0 | 2 | 1 | 1 | 1 | 1 | 2 | 2 | 2 | 0 | 1 | 1 | 2 |   |
| 17 | 0 | 0 | 0 | 1 | 2 | 0 | 0 | 0 | 1 | 0 | 0 | 1 | 0 | 1 | 2 | 0 | 0 | 1 | 1 | 3 | 0 | 3 | 0 | 1 | 0 | 0 |   |
| 13 | 0 | 0 | 0 | 0 | 0 | 2 | 0 | 0 | 0 | 0 | 1 | 0 | 0 | 0 | 0 | 0 | 1 | 0 | 0 | 1 | 0 | 0 | 1 | 0 | 3 | 1 |   |
| 14 | 1 | 0 | 1 | 0 | 0 | 1 | 1 | 0 | 0 | 0 | 0 | 1 | 0 | 0 | 1 | 0 | 1 | 1 | 0 | 0 | 2 | 0 | 1 | 1 | 0 | 1 |   |
| 24 | 2 | 1 | 1 | 0 | 0 | 0 | 0 | 0 | 1 | 2 | 1 | 0 | 1 | 0 | 2 | 1 | 0 | 0 | 1 | 0 | 1 | 1 | 3 | 0 | 2 | 0 |   |
| 18 | 2 | 1 | 2 | 0 | 0 |   |   |   |   |   |   |   |   |   |   |   |   |   |   |   |   |   |   |   |   |   |   |
