# Supplementary material
Source: PubMed Central journal article supplement (PMC3896054)
Supplement: NIHMS543571-supplement-4.pdf [file NIHMS543571-supplement-4.pdf]

## CUSTOMIZED SEARCH

| Proteins         | ENSG                      | HGNC       | TotalCounts | CACC | CACC | CACC | COLC | COLC | COLC | COLC | HT29 | HT29 | HT29 | SW4 | SW4 | DL1 | DL1 | DL1 | DL1 | HCT1 | LOVC | LOVC | LOVC | LOVC | LS17 | LS17 | LS17 | RKO | RKO | IRKO |
|------------------|---------------------------|------------|-------------|------|------|------|------|------|------|------|------|------|------|-----|-----|-----|-----|-----|-----|------|------|------|------|------|------|------|------|------|------|------|------|------|------|-----|-----|------|
| ENSP00000000233  | ENSG000000004059          | ARF5       | 298         | 20   | 9    | 8    | 9    | 11   | 8    | 15   | 6    | 7    | 11   | 1   | 3   | 10  | 6   | 6   | 8   | 10   | 11   | 11   | 16   | 11   | 9    | 6    | 6    | 21   | 7    | 8    | 20   | 13   | 11   |     |     |      |
| ENSP000000000412 | ENSG000000003056          | MP6R       | 104         | 8    | 4    | 5    | 3    | 2    | 1    | 2    | 4    | 5    | 5    | 4   | 3   | 3   | 1   | 4   | 0   | 6    | 2    | 3    | 8    | 3    | 3    | 2    | 3    | 4    | 2    | 1    | 4    | 6    | 3    |     |     |      |
| ENSP00000001008  | ENSG000000004478          | FKBP4      | 567         | 29   | 20   | 21   | 9    | 14   | 17   | 19   | 5    | 22   | 10   | 6   | 5   | 6   | 9   | 25  | 18  | 31   | 22   | 35   | 26   | 28   | 18   | 17   | 32   | 19   | 19   | 24   | 26   | 30   |      |     |     |      |
| ENSP00000001008  | rs561961;ENSG000000004478 | FKBP4      | 539         | 31   | 21   | 20   | 9    | 14   | 16   | 19   | 4    | 18   | 9    | 6   | 5   | 6   | 8   | 23  | 18  | 28   | 22   | 35   | 22   | 27   | 18   | 14   | 30   | 19   | 16   | 24   | 26   |      |      |     |     |      |
| ENSP000000002125 | ENSP00000000003509        | Ctcfzf56   | 26          | 0    | 2    | 0    | 1    | 1    | 0    | 2    | 1    | 1    | 2    | 0   | 3   | 2   | 0   | 2   | 0   | 0    | 1    | 0    | 0    | 1    | 0    | 0    | 1    | 0    | 0    | 1    | 0    | 1    | 1    | 3   |     |      |
| ENSP000000002165 | ENSP00000000001036        | FUCA2      | 69          | 1    | 0    | 2    | 3    | 3    | 0    | 2    | 2    | 0    | 1    | 2   | 3   | 2   | 4   | 6   | 2   | 4    | 2    | 3    | 3    | 2    | 2    | 2    | 1    | 4    | 8    | 3    | 1    | 1    | 0    |     |     |      |
| ENSP000000003100 | ENSP00000000001630        | CYP51A1    | 332         | 22   | 10   | 14   | 6    | 5    | 6    | 11   | 8    | 13   | 16   | 6   | 10  | 11  | 7   | 11  | 9   | 9    | 11   | 9    | 12   | 7    | 18   | 11   | 10   | 22   | 11   | 12   | 13   | 11   | 11   |     |     |      |
| ENSP000000003302 | ENSG0000000048028         | USP28      | 31          | 4    | 0    | 0    | 0    | 1    | 1    | 1    | 1    | 1    | 2    | 1   | 2   | 1   | 2   | 0   | 0   | 1    | 0    | 1    | 0    | 2    | 1    | 1    | 0    | 0    | 1    | 3    | 1    | 1    | 2    | 2   |     |      |
| ENSP000000003607 | rs47954;ENSG000000004142  | POLIDP2    | 124         | 7    | 5    | 5    | 3    | 4    | 3    | 7    | 3    | 3    | 3    | 1   | 2   | 2   | 3   | 5   | 5   | 3    | 2    | 4    | 6    | 3    | 5    | 3    | 2    | 10   | 7    | 3    | 5    | 6    | 4    |     |     |      |
| ENSP000000004980 | ENSP00000000079387        | SENP1      | 29          | 0    | 0    | 1    | 1    | 0    | 0    | 1    | 0    | 2    | 1    | 0   | 1   | 0   | 0   | 2   | 0   | 0    | 1    | 2    | 0    | 1    | 1    | 0    | 1    | 3    | 5    | 2    | 2    | 0    | 2    |     |     |      |
| ENSP000000005226 | ENSG0000000006611         | USH1C      | 19          | 0    | 1    | 0    | 4    | 2    | 3    | 3    | 0    | 2    | 0    | 0   | 0   | 0   | 0   | 0   | 0   | 1    | 0    | 0    | 0    | 0    | 0    | 0    | 1    | 2    | 0    | 0    | 0    | 0    | 0    |     |     |      |
| ENSP000000005257 | ENSG0000000006451         | RALA       | 107         | 6    | 3    | 3    | 2    | 2    | 1    | 7    | 7    | 1    | 5    | 3   | 2   | 4   | 3   | 3   | 2   | 3    | 1    | 2    | 2    | 3    | 5    | 10   | 4    | 6    | 5    | 2    | 3    | 5    | 2    |     |     |      |
| ENSP000000005259 | ENSG0000000075790         | BCAP29     | 23          | 1    | 0    | 0    | 0    | 0    | 0    | 1    | 1    | 1    | 2    | 2   | 0   | 0   | 0   | 0   | 0   | 0    | 0    | 1    | 1    | 0    | 2    | 3    | 2    | 0    | 0    | 0    | 0    | 2    | 3    |     |     |      |
| ENSP000000005260 | ENSG0000000006453         | BAIAP2L1   | 116         | 3    | 3    | 4    | 3    | 3    | 0    | 10   | 8    | 4    | 4    | 1   | 3   | 4   | 8   | 3   | 0   | 5    | 3    | 4    | 6    | 3    | 10   | 4    | 3    | 6    | 4    | 4    | 1    | 2    | 0    |     |     |      |
| ENSP000000005279 | ENSP00000000006114        | AP1GBP1    | 33          | 2    | 3    | 0    | 2    | 2    | 1    | 1    | 1    | 2    | 1    | 1   | 0   | 1   | 0   | 1   | 2   | 2    | 1    | 1    | 2    | 1    | 0    | 0    | 0    | 2    | 3    | 0    | 1    | 0    | 0    |     |     |      |
| ENSP000000005340 | ENSG0000000004975         | DVL2       | 11          | 0    | 0    | 0    | 2    | 0    | 1    | 1    | 0    | 0    | 0    | 0   | 0   | 0   | 1   | 1   | 0   | 0    | 0    | 2    | 2    | 0    | 0    | 0    | 0    | 0    | 0    | 1    | 0    | 0    | 0    |     |     |      |
| ENSP000000005386 | ENSG000000005175          | RAP3A      | 165         | 10   | 9    | 6    | 4    | 1    | 0    | 6    | 4    | 3    | 5    | 0   | 1   | 7   | 5   | 7   | 7   | 6    | 2    | 12   | 8    | 10   | 7    | 3    | 4    | 9    | 9    | 0    | 6    | 8    | 6    |     |     |      |
| ENSP000000005558 | ENSP00000000006652        | IFRD1      | 15          | 1    | 1    | 0    | 0    | 1    | 0    | 0    | 1    | 0    | 1    | 2   | 0   | 0   | 0   | 1   | 0   | 0    | 0    | 0    | 0    | 0    | 1    | 2    | 0    | 0    | 0    | 0    | 1    | 2    | 1    |     |     |      |
| ENSP000000005905 | ENSP00000000007202        | KIAA0100   | 15          | 2    | 0    | 0    | 0    | 0    | 3    | 0    | 0    | 0    | 1    | 0   | 1   | 1   | 1   | 1   | 0   | 0    | 0    | 0    | 0    | 0    | 1    | 0    | 1    | 0    | 1    | 0    | 0    | 2    | 1    |     |     |      |
| ENSP000000006658 | ENSP00000000006282        | SPATA20    | 19          | 1    | 0    | 2    | 0    | 0    | 0    | 1    | 1    | 0    | 1    | 1   | 0   | 1   | 0   | 1   | 0   | 1    | 0    | 1    | 0    | 1    | 0    | 0    | 0    | 1    | 3    | 1    | 0    | 0    | 2    | 0   |     |      |
| ENSP000000006951 | ENSG0000000007168         | PAFAH1B1   | 175         | 11   | 2    | 8    | 7    | 5    | 10   | 8    | 3    | 4    | 8    | 0   | 5   | 5   | 3   | 5   | 5   | 3    | 10   | 11   | 8    | 9    | 5    | 1    | 1    | 6    | 6    | 7    | 9    | 4    | 6    |     |     |      |
| ENSP000000007516 | ENSG000000004779          | NUDFA81    | 204         | 10   | 2    | 6    | 1    | 4    | 11   | 4    | 2    | 3    | 15   | 0   | 8   | 7   | 1   | 5   | 11  | 5    | 5    | 6    | 6    | 5    | 10   | 8    | 8    | 14   | 8    | 7    | 17   | 6    | 9    |     |     |      |
| ENSP000000007633 | ENSP00000000006534        | ALDH3B1    | 16          | 1    | 0    | 0    | 0    | 1    | 1    | 2    | 3    | 2    | 0    | 0   | 0   | 0   | 1   | 0   | 1   | 1    | 0    | 1    | 0    | 1    | 0    | 0    | 1    | 0    | 0    | 0    | 0    | 0    | 0    | 0   |     |      |
| ENSP000000007699 | ENSG00000000006047        | YBX2       | 152         | 7    | 4    | 4    | 3    | 11   | 2    | 4    | 2    | 3    | 7    | 3   | 1   | 8   | 4   | 4   | 6   | 6    | 4    | 5    | 9    | 4    | 5    | 4    | 7    | 5    | 3    | 8    | 8    | 7    |      |     |     |      |
| ENSP000000007722 | ENSG00000000005884        | ITGA3      | 98          | 0    | 0    | 0    | 3    | 1    | 2    | 6    | 2    | 3    | 6    | 0   | 6   | 6   | 1   | 4   | 9   | 13   | 8    | 7    | 4    | 4    | 2    | 2    | 2    | 1    | 4    | 1    | 1    | 0    | 0    |     |     |      |
| ENSP000000009041 | ENSP000000000010270       | STARD3NL   | 14          | 0    | 0    | 1    | 2    | 0    | 1    | 1    | 0    | 1    | 1    | 0   | 1   | 1   | 0   | 0   | 0   | 0    | 1    | 0    | 1    | 0    | 0    | 0    | 0    | 0    | 0    | 0    | 1    | 1    | 1    |     |     |      |
| ENSP000000009180 | ENSP000000000010278       | CD9        | 84          | 0    | 0    | 1    | 2    | 2    | 2    | 1    | 0    | 0    | 10   | 2   | 4   | 3   | 4   | 4   | 1   | 0    | 2    | 5    | 3    | 4    | 3    | 3    | 4    | 7    | 6    | 7    | 2    | 1    | 1    |     |     |      |
| ENSP000000009530 | ENSP00000000019582        | CD74       | 14          | 5    | 4    | 5    | 0    | 0    | 0    | 0    | 0    | 0    | 0    | 0   | 0   | 0   | 0   | 0   | 0   | 0    | 0    | 0    | 0    | 0    | 0    | 0    | 0    | 0    | 0    | 0    | 0    | 0    | 0    |     |     |      |
| ENSP000000009589 | ENSG00000000008988        | RP520      | 79          | 3    | 5    | 2    | 0    | 4    | 1    | 2    | 1    | 2    | 3    | 1   | 3   | 4   | 2   | 4   | 3   | 1    | 3    | 2    | 3    | 4    | 2    | 2    | 2    | 2    | 4    | 3    | 3    | 4    | 4    |     |     |      |
| ENSP000000010299 | ENSP000000000009780       | MAG76A     | 12          | 2    | 0    | 0    | 0    | 2    | 1    | 0    | 2    | 0    | 0    | 0   | 1   | 1   | 0   | 1   | 0   | 0    | 0    | 0    | 0    | 0    | 0    | 0    | 1    | 0    | 0    | 0    | 0    | 0    | 0    |     |     |      |
| ENSP000000010404 | ENSP000000000008394       | MGST1      | 76          | 5    | 2    | 2    | 3    | 7    | 2    | 3    | 3    | 2    | 1    | 0   | 1   | 2   | 1   | 1   | 2   | 1    | 1    | 3    | 3    | 1    | 5    | 2    | 3    | 6    | 4    | 2    | 3    | 3    | 2    |     |     |      |
| ENSP000000011473 | ENSP000000000008282       | SYPL1      | 12          | 0    | 0    | 1    | 0    | 1    | 1    | 0    | 0    | 0    | 0    | 1   | 1   | 0   | 0   | 0   | 0   | 0    | 0    | 1    | 0    | 0    | 1    | 1    | 1    | 1    | 0    | 0    | 0    | 1    | 1    | 0   |     |      |
| ENSP000000011619 | ENSP0000000000010017      | RANBP9     | 38          | 1    | 1    | 3    | 2    | 2    | 1    | 1    | 0    | 1    | 1    | 1   | 0   | 3   | 1   | 1   | 2   | 2    | 3    | 3    | 3    | 2    | 0    | 2    | 0    | 0    | 0    | 0    | 0    | 2    | 0    |     |     |      |
| ENSP000000011700 | ENSP000000000048707       | VP51D3     | 20          | 0    | 0    | 0    | 0    | 1    | 0    | 1    | 0    | 1    | 1    | 0   | 0   | 0   | 2   | 0   | 0   | 3    | 0    | 0    | 1    | 1    | 2    | 1    | 1    | 1    | 0    | 0    | 1    | 1    | 2    |     |     |      |
| ENSP000000012443 | ENSP0000000000011485      | PPM5C      | 182         | 10   | 5    | 8    | 6    | 5    | 5    | 6    | 4    | 11   | 5    | 1   | 2   | 3   | 3   | 6   | 6   | 10   | 10   | 11   | 5    | 9    | 3    | 1    | 5    | 10   | 8    | 6    | 7    | 6    | 5    |     |     |      |
| ENSP000000013034 | ENSP0000000000011052      | NME2, NME1 | 376         | 20   | 14   | 15   | 7    | 15   | 16   | 12   | 6    | 9    | 14   | 2   | 8   | 10  | 9   | 12  | 14  | 15   | 18   | 13   | 15   | 7    | 11   | 4    | 6    | 21   | 17   | 19   | 22   | 11   | 14   |     |     |      |
| ENSP000000013070 | ENSP0000000000012963      | UBR7       | 73          | 3    | 2    | 0    | 4    | 3    | 4    | 4    | 0    | 1    | 4    | 1   | 0   | 3   | 2   | 1   | 2   | 1    | 2    | 4    | 4    | 2    | 1    | 1    | 0    | 2    | 4    | 2    | 6    | 4    | 6    |     |     |      |
| ENSP000000013125 | ENSP0000000000012983      | MAMP4K5    | 11          | 2    | 0    | 0    | 0    | 1    | 0    | 1    | 0    | 0    | 0    | 0   | 0   | 0   | 0   | 0   | 0   | 0    | 0    | 0    | 0    | 1    | 0    | 1    | 0    | 0    | 1    | 0    | 2    | 0    | 2    |     |     |      |
| ENSP000000014112 | ENSP0000000000011304      | PTBP1      | 154         | 3    | 3    | 7    | 0    | 3    | 6    | 5    | 0    | 8    | 3    | 1   | 6   | 2   | 4   | 5   | 5   | 1    | 7    | 3    | 4    | 10   | 8    | 6    | 15   | 5    | 4    | 6    | 7    | 6    | 11   |     |     |      |
| ENSP000000014914 | ENSG000000013588          | GPCR5A     | 10          | 0    | 0    | 0    | 0    | 0    | 2    | 2    | 0    | 0    | 0    | 0   | 0   | 0   | 0   | 0   | 0   | 0    | 0    | 0    | 0    | 0    | 3    | 0    | 2    | 0    | 0    | 1    | 0    | 0    | 0    |     |     |      |
| ENSP000000014930 | ENSG000000013583          | HEBP1      | 120         | 7    | 5    | 4    | 3    | 3    | 3    | 2    | 1    | 2    | 2    | 3   | 4   | 5   | 3   | 2   | 5   | 4    | 7    | 5    | 3    | 6    | 4    | 4    | 8    | 6    | 5    | 3    | 5    | 4    |      |     |     |      |
| ENSP000000015926 | ENSP000000000068400       | BCLAF1     | 99          | 3    | 0    | 1    | 11   | 11   | 12   | 5    | 1    | 3    | 3    | 1   | 2   | 5   | 1   | 1   | 2   | 2    | 2    | 6    | 1    | 1    | 2    | 2    | 2    | 0    | 2    | 4    | 3    | 3    | 6    | 3   |     |      |
| ENSP000000016946 | ENSP000000000183054       | RGP6D      | 12          | 0    | 1    | 1    | 0    | 0    | 0    | 0    | 0    | 1    | 1    | 1   | 1   | 1   | 0   | 0   | 0   | 0    | 1    | 0    | 0    | 0    | 0    | 1    | 0    | 0    | 0    | 0    | 1    | 0    | 1    |     |     |      |
| ENSP000000017003 | ENSP0000000000015532      | XYLT2      | 15          | 0    | 1    | 3    | 1    | 1    | 0    | 2    | 1    | 0    | 0    | 0   | 0   | 0   | 0   | 0   | 0   | 0    | 1    | 2    | 1    | 1    | 0    | 1    | 0    | 0    | 0    | 0    | 0    | 0    | 0    |     |     |      |
| ENSP000000019317 | ENSP0000000000017797      | RALBP1     | 24          | 2    | 1    | 2    | 1    | 1    | 1    | 0    | 0    | 0    | 0    | 0   | 0   | 3   | 2   | 1   | 0   | 1    | 0    | 3    | 0    | 0    | 1    | 0    | 1    | 1    | 0    | 1    | 1    | 0    | 1    |     |     |      |
| ENSP000000022615 | ENSG0000000078668         | VDAC3      | 170         | 7    | 2    | 7    | 8    | 14   | 6    | 3    | 2    | 1    | 6    | 3   | 5   | 4   | 2   | 6   | 5   | 6    | 8    | 4    | 4    | 7    | 4    | 4    | 5    | 8    | 5    | 9    | 10   | 6    | 6    |     |     |      |
| ENSP000000023939 | ENSP00000000022277        | C20orf43   | 86          | 6    | 4    | 2    | 4    | 4    | 4    | 4    | 5    | 4    | 1    | 1   | 2   | 2   | 2   | 3   | 2   | 3    | 1    | 2    | 6    | 3    | 4    | 0    | 2    | 3    | 2    | 2    | 1    | 5    | 2    |     |     |      |
| ENSP000000025008 | ENSP00000000023287        | R1BCC1     | 23          | 3    | 0    | 0    | 1    | 0    | 1    | 2    | 1    | 1    | 1    | 0   | 1   | 0   | 0   | 1   | 1   | 2    | 1    | 0    | 1    | 1    | 1    | 0    | 1    | 1    | 0    | 0    | 0    | 1    | 1    |     |     |      |
| ENSP000000025399 | ENSP00000000023734        | STRAP      | 359         | 20   | 13   | 12   | 7    | 11   | 10   | 11   | 9    | 5    | 14   | 4   | 8   | 12  | 8   | 10  | 11  | 15   | 13   |      |      |      |      |      |      |      |      |      |      |      |      |     |     |      |

|                         |                  |              |      |    |    |    |    |     |    |    |    |    |     |    |    |    |    |    |    |    |    |    |    |    |    |    |    |    |     |    |    |    |    |    |
|-------------------------|------------------|--------------|------|----|----|----|----|-----|----|----|----|----|-----|----|----|----|----|----|----|----|----|----|----|----|----|----|----|----|-----|----|----|----|----|----|
| ENSP00000173527         | ENSG000000066583 | ISOC1        | 42   | 2  | 2  | 1  | 1  | 2   | 1  | 1  | 1  | 1  | 1   | 1  | 1  | 1  | 1  | 2  | 2  | 1  | 2  | 2  | 1  | 2  | 2  | 1  | 3  | 2  | 0   | 1  | 2  | 1  |    |    |
| ENSP00000173898,ENSP000 | ENSG000000067445 | TRO          | 13   | 0  | 1  | 0  | 0  | 0   | 1  | 0  | 0  | 1  | 1   | 0  | 0  | 1  | 0  | 1  | 1  | 0  | 1  | 0  | 1  | 0  | 1  | 0  | 0  | 1  | 0   | 0  | 1  | 1  |    |    |
| ENSP00000174653,ENSP000 | ENSG000000070718 | AP3M2        | 10   | 0  | 0  | 1  | 1  | 0   | 0  | 2  | 0  | 0  | 0   | 0  | 0  | 0  | 1  | 0  | 1  | 1  | 2  | 0  | 0  | 0  | 0  | 0  | 0  | 0  | 1   | 0  | 0  | 0  |    |    |
| ENSP00000174661,ENSP000 | ENSG000000070756 | PABPCP5,PABI | 552  | 27 | 18 | 14 | 22 | 22  | 9  | 20 | 8  | 8  | 20  | 6  | 10 | 17 | 34 | 18 | 23 | 14 | 18 | 19 | 19 | 19 | 15 | 16 | 21 | 18 | 18  | 33 | 26 | 27 |    |    |
| 455                     | 9                | 10           | 4    | 7  | 7  | 12 | 9  | 8   | 5  | 17 | 7  | 8  | 14  | 15 | 9  | 28 | 54 | 41 | 15 | 15 | 13 | 9  | 5  | 8  | 11 | 4  | 7  | 53 | 24  | 27 |    |    |    |    |
| ENSP00000175506,rs10496 | ENSG000000070669 | ASNS         | 505  | 12 | 12 | 4  | 5  | 8   | 10 | 11 | 7  | 4  | 20  | 11 | 10 | 18 | 17 | 10 | 31 | 62 | 43 | 21 | 18 | 15 | 10 | 4  | 8  | 12 | 7   | 7  | 56 | 27 |    |    |
| ENSP00000175506,rs10496 | ENSG000000070669 | ASNS         | 505  | 12 | 12 | 4  | 5  | 8   | 10 | 11 | 7  | 4  | 20  | 11 | 10 | 18 | 17 | 10 | 31 | 62 | 43 | 21 | 18 | 15 | 10 | 4  | 8  | 12 | 7   | 7  | 56 | 27 |    |    |
| ENSP00000176763,ENSP000 | ENSG000000072786 | STK10        | 46   | 0  | 0  | 2  | 6  | 6   | 3  | 2  | 2  | 1  | 0   | 1  | 1  | 0  | 1  | 0  | 2  | 2  | 2  | 0  | 0  | 0  | 3  | 0  | 0  | 0  | 2   | 0  | 4  | 3  |    |    |
| ENSP00000177742,ENSP000 | ENSG000000074071 | MRPS34       | 51   | 1  | 1  | 1  | 1  | 4   | 2  | 1  | 0  | 3  | 1   | 1  | 1  | 1  | 1  | 1  | 2  | 5  | 3  | 2  | 2  | 3  | 2  | 1  | 2  | 2  | 3   | 1  | 1  | 1  |    |    |
| ENSP00000177742,rs11552 | ENSG000000074071 | MRPS34       | 38   | 0  | 1  | 1  | 1  | 4   | 2  | 1  | 0  | 1  | 1   | 1  | 1  | 0  | 1  | 1  | 0  | 5  | 2  | 1  | 2  | 2  | 0  | 1  | 0  | 2  | 3   | 1  | 1  | 1  |    |    |
| ENSP00000179259         | ENSG000000078237 | C12orf5      | 60   | 7  | 1  | 3  | 2  | 1   | 1  | 2  | 0  | 1  | 2   | 1  | 0  | 0  | 0  | 1  | 3  | 3  | 2  | 1  | 4  | 1  | 2  | 1  | 1  | 4  | 2   | 2  | 6  | 3  |    |    |
| ENSP00000179765,ENSP000 | ENSG000000076108 | BAZ2A        | 83   | 3  | 3  | 2  | 1  | 0   | 0  | 2  | 3  | 3  | 1   | 5  | 3  | 5  | 4  | 6  | 0  | 2  | 1  | 5  | 4  | 2  | 5  | 5  | 4  | 0  | 2   | 1  | 3  | 5  |    |    |
| ENSP00000181796,ENSP000 | ENSG000000065809 | FAM107B      | 21   | 5  | 1  | 2  | 0  | 0   | 0  | 2  | 1  | 1  | 0   | 0  | 0  | 0  | 0  | 1  | 1  | 2  | 1  | 0  | 0  | 0  | 0  | 1  | 0  | 0  | 0   | 2  | 0  | 1  |    |    |
| ENSP00000181839,ENSP000 | ENSG000000065883 | CLC2L5       | 17   | 0  | 0  | 1  | 1  | 1   | 0  | 1  | 0  | 0  | 1   | 2  | 0  | 0  | 0  | 1  | 0  | 1  | 0  | 1  | 3  | 1  | 0  | 0  | 0  | 2  | 1   | 0  | 0  | 0  |    |    |
| ENSP00000182377,ENSP000 | ENSG000000064763 | FAR2         | 17   | 0  | 0  | 0  | 0  | 0   | 0  | 3  | 1  | 2  | 0   | 0  | 0  | 0  | 0  | 1  | 0  | 0  | 0  | 1  | 0  | 1  | 1  | 0  | 0  | 3  | 2   | 0  | 0  | 1  |    |    |
| ENSP00000184266,ENSP000 | ENSG000000215727 | HEATR6       | 37   | 1  | 0  | 1  | 0  | 1   | 1  | 0  | 0  | 2  | 3   | 1  | 1  | 0  | 0  | 1  | 5  | 0  | 2  | 0  | 2  | 0  | 1  | 0  | 3  | 2  | 2   | 3  | 3  | 0  |    |    |
| ENSP00000184956         | ENSG000000068097 | C2orf30      | 29   | 0  | 2  | 0  | 2  | 1   | 1  | 1  | 1  | 0  | 0   | 0  | 0  | 0  | 1  | 0  | 4  | 2  | 4  | 1  | 0  | 0  | 0  | 0  | 0  | 2  | 1   | 1  | 2  | 0  |    |    |
| ENSP00000185150,ENSP000 | ENSG000000068912 | CLIC5        | 42   | 1  | 2  | 1  | 2  | 4   | 2  | 3  | 0  | 2  | 1   | 0  | 1  | 0  | 1  | 0  | 1  | 3  | 1  | 1  | 1  | 0  | 2  | 1  | 0  | 1  | 2   | 4  | 2  | 1  |    |    |
| ENSP00000185206,ENSP000 | ENSG000000112782 | C2orf30      | 38   | 2  | 0  | 2  | 0  | 2   | 2  | 1  | 1  | 1  | 2   | 0  | 0  | 0  | 0  | 1  | 0  | 0  | 0  | 1  | 0  | 0  | 2  | 5  | 1  | 8  | 4   | 0  | 1  | 1  |    |    |
| ENSP00000185942_1944:TA | ENSG000000072571 | HMMR         | 27   | 1  | 3  | 0  | 1  | 0   | 0  | 0  | 0  | 0  | 0   | 0  | 0  | 0  | 2  | 3  | 4  | 1  | 0  | 1  | 3  | 1  | 2  | 1  | 2  | 0  | 1   | 1  | 0  | 0  |    |    |
| ENSP00000188376,ENSP000 | ENSG000000075415 | SLC25A3      | 238  | 13 | 1  | 11 | 4  | 6   | 6  | 5  | 2  | 5  | 13  | 4  | 8  | 7  | 3  | 8  | 8  | 7  | 11 | 9  | 5  | 6  | 17 | 5  | 15 | 11 | 6   | 11 | 15 | 6  | 10 |    |
| ENSP00000188376_A61V,EN | ENSG000000075415 | SLC25A3      | 178  | 10 | 1  | 9  | 2  | 3   | 5  | 4  | 1  | 4  | 8   | 2  | 6  | 6  | 1  | 8  | 5  | 4  | 9  | 7  | 7  | 5  | 12 | 5  | 13 | 8  | 3   | 8  | 10 | 4  | 8  |    |
| ENSP00000189444,ENSP000 | ENSG000000077150 | NFKB2        | 56   | 2  | 1  | 0  | 0  | 0   | 0  | 1  | 1  | 0  | 0   | 0  | 0  | 0  | 2  | 1  | 6  | 8  | 5  | 2  | 4  | 3  | 1  | 0  | 1  | 1  | 1   | 1  | 9  | 2  | 4  |    |
| ENSP00000191018,ENSP000 | ENSG000000064601 | CTSA         | 97   | 7  | 5  | 5  | 2  | 4   | 4  | 5  | 2  | 3  | 2   | 3  | 2  | 2  | 2  | 2  | 3  | 3  | 4  | 3  | 2  | 2  | 6  | 2  | 2  | 5  | 3   | 3  | 4  | 2  | 3  |    |
| ENSP00000191922         | ENSG000000065054 | SLC9A3R2     | 17   | 0  | 0  | 0  | 0  | 0   | 0  | 3  | 2  | 3  | 1   | 1  | 0  | 0  | 0  | 1  | 0  | 0  | 1  | 0  | 0  | 0  | 2  | 0  | 0  | 1  | 1   | 0  | 0  | 1  | 0  |    |
| ENSP00000192788,ENSP000 | ENSG000000065060 | UHRF1BP1     | 32   | 2  | 2  | 0  | 0  | 0   | 1  | 0  | 1  | 1  | 2   | 1  | 0  | 1  | 0  | 3  | 0  | 1  | 1  | 0  | 4  | 2  | 3  | 2  | 0  | 0  | 0   | 0  | 4  | 1  | 1  |    |
| ENSP00000193403         | ENSG000000072110 | ACTN1        | 2073 | 75 | 50 | 59 | 63 | 110 | 91 | 45 | 53 | 57 | 174 | 64 | 86 | 46 | 35 | 52 | 67 | 74 | 63 | 65 | 75 | 57 | 73 | 46 | 51 | 87 | 70  | 60 | 94 | 64 | 67 |    |
| ENSP00000193422,ENSP000 | ENSG000000081177 | EXD2         | 73   | 4  | 2  | 1  | 1  | 1   | 3  | 0  | 0  | 1  | 3   | 6  | 5  | 2  | 3  | 4  | 3  | 2  | 4  | 3  | 2  | 2  | 4  | 5  | 4  | 0  | 0   | 1  | 3  | 2  | 2  |    |
| ENSP00000194214,ENSP000 | ENSG000000081870 | HSPB11       | 20   | 0  | 0  | 1  | 0  | 0   | 2  | 0  | 0  | 0  | 1   | 0  | 0  | 2  | 0  | 3  | 1  | 0  | 2  | 1  | 1  | 2  | 1  | 0  | 0  | 0  | 0   | 0  | 3  | 0  | 0  |    |
| ENSP00000194900,ENSP000 | ENSG000000082458 | DLG3         | 20   | 1  | 0  | 0  | 4  | 2   | 3  | 1  | 0  | 0  | 0   | 0  | 1  | 0  | 0  | 1  | 0  | 0  | 1  | 0  | 2  | 1  | 1  | 0  | 0  | 0  | 1   | 2  | 0  | 0  | 0  |    |
| ENSP00000195419,ENSP000 | ENSG000000082898 | XPO1         | 548  | 31 | 14 | 16 | 14 | 17  | 15 | 16 | 6  | 12 | 28  | 4  | 14 | 22 | 7  | 23 | 19 | 20 | 18 | 22 | 19 | 26 | 24 | 8  | 15 | 29 | 14  | 10 | 35 | 21 | 29 |    |
| ENSP00000196061,ENSP000 | ENSG000000083444 | PLD1         | 79   | 7  | 1  | 5  | 0  | 0   | 0  | 1  | 0  | 3  | 4   | 0  | 2  | 5  | 0  | 3  | 5  | 2  | 8  | 3  | 1  | 4  | 4  | 0  | 1  | 3  | 1   | 2  | 7  | 2  | 5  |    |
| ENSP00000196169,ENSP000 | ENSG000000083544 | TRD3         | 13   | 0  | 0  | 1  | 2  | 0   | 1  | 0  | 0  | 0  | 0   | 0  | 1  | 2  | 0  | 0  | 0  | 0  | 0  | 0  | 1  | 0  | 1  | 0  | 0  | 0  | 1   | 1  | 1  | 0  | 0  |    |
| ENSP00000196371         | ENSG000000083720 | OXDC1        | 173  | 1  | 0  | 1  | 0  | 1   | 2  | 1  | 1  | 1  | 0   | 7  | 2  | 5  | 4  | 4  | 4  | 4  | 8  | 3  | 9  | 7  | 9  | 11 | 6  | 4  | 9   | 15 | 12 | 18 | 15 | 10 |
| ENSP00000196551         | ENSG000000083845 | RP55         | 193  | 13 | 3  | 7  | 0  | 4   | 6  | 6  | 4  | 5  | 16  | 2  | 5  | 4  | 3  | 6  | 9  | 5  | 8  | 5  | 3  | 4  | 11 | 1  | 5  | 11 | 5   | 6  | 20 | 8  | 8  |    |
| ENSP00000196968,ENSP000 | ENSG000000084207 | GSTP1        | 641  | 27 | 16 | 30 | 6  | 27  | 26 | 13 | 22 | 23 | 28  | 4  | 10 | 12 | 5  | 15 | 17 | 16 | 23 | 14 | 27 | 34 | 26 | 8  | 24 | 41 | 46  | 32 | 14 | 23 |    |    |
| ENSP00000196968,rs16951 | ENSG000000084207 | GSTP1        | 642  | 25 | 16 | 30 | 6  | 27  | 26 | 14 | 22 | 24 | 26  | 4  | 10 | 12 | 5  | 15 | 20 | 16 | 24 | 14 | 27 | 33 | 26 | 7  | 23 | 41 | 48  | 30 | 32 | 16 | 23 |    |
| ENSP00000198765,ENSP000 | ENSG000000085719 | CPNE3        | 168  | 4  | 5  | 6  | 4  | 3   | 4  | 3  | 2  | 3  | 7   | 3  | 3  | 5  | 3  | 5  | 9  | 11 | 7  | 6  | 10 | 6  | 5  | 2  | 3  | 8  | 6   | 3  | 14 | 8  | 10 |    |
| ENSP00000198765,rs41333 | ENSG000000085719 | CPNE3        | 123  | 3  | 4  | 4  | 3  | 2   | 2  | 2  | 1  | 2  | 5   | 0  | 2  | 4  | 1  | 3  | 7  | 8  | 6  | 5  | 8  | 4  | 3  | 0  | 2  | 6  | 3   | 2  | 13 | 7  | 11 |    |
| ENSP00000198767,ENSP000 | ENSG000000085721 | RNR3         | 39   | 3  | 3  | 1  | 1  | 4   | 1  | 1  | 0  | 2  | 1   | 2  | 1  | 0  | 0  | 2  | 0  | 2  | 1  | 1  | 3  | 0  | 2  | 0  | 0  | 4  | 1   | 0  | 0  | 2  | 1  |    |
| ENSP00000198939,ENSP000 | ENSG000000085872 | CHERP        | 66   | 3  | 0  | 3  | 2  | 3   | 3  | 2  | 1  | 1  | 5   | 0  | 2  | 3  | 0  | 4  | 3  | 2  | 3  | 2  | 2  | 2  | 5  | 2  | 1  | 2  | 3   | 3  | 3  | 0  | 1  |    |
| ENSP00000199320         | ENSG000000086189 | DIMT1L       | 60   | 3  | 3  | 1  | 2  | 2   | 1  | 1  | 1  | 1  | 2   | 0  | 2  | 2  | 1  | 1  | 3  | 1  | 2  | 3  | 2  | 2  | 3  | 2  | 1  | 1  | 1   | 6  | 5  | 4  |    |    |
| ENSP00000199448         | ENSG000000086289 | EPDR1        | 14   | 0  | 0  | 0  | 2  | 0   | 1  | 0  | 0  | 0  | 2   | 0  | 2  | 3  | 0  | 1  | 1  | 0  | 0  | 1  | 0  | 1  | 0  | 0  | 0  | 0  | 0   | 0  | 0  | 0  | 0  |    |
| ENSP00000199706,ENSP000 | ENSG000000086504 | MRPL28       | 13   | 0  | 0  | 0  | 0  | 1   | 0  | 1  | 1  | 1  | 1   | 0  | 0  | 0  | 0  | 0  | 1  | 0  | 0  | 0  | 0  | 0  | 1  | 0  | 2  | 0  | 2   | 0  | 2  | 0  | 0  |    |
| ENSP00000199764         | ENSG000000086548 | CEACAM6      | 31   | 0  | 0  | 1  | 0  | 0   | 0  | 0  | 1  | 2  | 0   | 0  | 0  | 0  | 0  | 0  | 0  | 0  | 0  | 0  | 0  | 0  | 0  | 5  | 2  | 8  | 6   | 3  | 3  | 0  | 0  |    |
| ENSP00000199814         | ENSG000000086589 | RBM22        | 85   | 3  | 3  | 4  | 3  | 3   | 2  | 3  | 1  | 2  | 3   | 1  | 3  | 1  | 2  | 2  | 1  | 3  | 2  | 4  | 8  | 2  | 7  | 4  | 2  | 3  | 3   | 2  | 2  | 4  | 2  |    |
| ENSP00000200135         | ENSG000000086827 | ZW10         | 98   | 4  | 5  | 4  | 6  | 3   | 3  | 6  | 1  | 5  | 8   | 0  | 2  | 4  | 2  | 4  | 0  | 1  | 3  | 4  | 6  | 3  | 4  | 1  | 2  | 5  | 5   | 0  | 2  | 1  | 4  |    |
| ENSP00000200181,ENSP000 | ENSG000000132470 | ITGB4        | 550  | 3  | 3  | 3  | 29 | 55  | 41 | 20 | 14 | 22 | 43  | 20 | 22 | 8  | 11 | 16 | 8  | 23 | 16 | 11 | 12 | 13 | 39 | 37 | 30 | 24 | 17  | 10 | 0  | 0  | 0  |    |
| ENSP00000200457,ENSP000 | ENSG000000087077 | TRIP6        | 23   | 2  | 0  | 1  | 0  | 0   | 0  | 0  | 0  | 0  | 0   | 0  | 0  | 1  | 0  | 0  | 1  | 1  | 0  | 0  | 1  | 0  | 0  | 0  | 0  | 1  | 0   | 0  | 9  | 2  | 4  |    |
| ENSP00000200639,ENSP000 | ENSG000000005893 | LAMP2        | 56   | 4  | 1  | 3  | 0  | 2   | 3  | 1  | 2  | 1  | 5   | 0  | 4  | 2  | 0  | 1  | 1  | 2  | 2  | 2  | 1  | 2  | 3  | 0  | 4  | 3  | 2   | 2  | 2  | 1  | 0  |    |
| ENSP00000201586,ENSP000 | ENSG000000088002 | SULT2B1      | 33   | 0  | 0  | 0  | 3  | 4   | 2  | 4  | 4  | 5  | 0   | 0  | 0  | 3  | 0  | 1  | 0  | 0  | 0  | 0  | 2  | 3  | 2  | 0  | 0  | 0  | 0</ |    |    |    |    |    |

|                 |                  |                 |              |      |     |    |    |     |    |    |    |    |     |    |    |     |     |    |     |     |     |     |     |    |    |    |    |     |     |    |     |     |     |     |
|-----------------|------------------|-----------------|--------------|------|-----|----|----|-----|----|----|----|----|-----|----|----|-----|-----|----|-----|-----|-----|-----|-----|----|----|----|----|-----|-----|----|-----|-----|-----|-----|
| ENSP00000215754 | ENSG00000099964  | MIF             | 168          | 6    | 6   | 6  | 0  | 9   | 5  | 3  | 4  | 3  | 4   | 4  | 2  | 4   | 7   | 2  | 5   | 8   | 7   | 8   | 9   | 6  | 4  | 5  | 2  | 10  | 8   | 8  | 7   | 8   | 8   |     |
| ENSP00000215773 | ENSP00000099977  | DDT             | 217          | 8    | 4   | 8  | 8  | 11  | 11 | 8  | 4  | 6  | 4   | 0  | 5  | 6   | 1   | 4  | 7   | 12  | 9   | 10  | 8   | 8  | 9  | 3  | 8  | 12  | 10  | 6  | 9   | 9   | 9   |     |
| ENSP00000215793 | ENSG00000099995  | SF3A1           | 470          | 22   | 13  | 15 | 10 | 14  | 11 | 13 | 9  | 10 | 22  | 16 | 18 | 12  | 8   | 17 | 14  | 17  | 15  | 16  | 18  | 13 | 25 | 20 | 21 | 22  | 12  | 11 | 22  | 24  | 10  |     |
| ENSP00000215829 | ENSP000000100028 | ENRPF3          | 60           | 2    | 0   | 2  | 1  | 2   | 1  | 4  | 1  | 2  | 3   | 0  | 2  | 4   | 1   | 2  | 4   | 3   | 1   | 1   | 2   | 3  | 4  | 0  | 1  | 3   | 3   | 1  | 3   | 1   | 3   |     |
| ENSP00000215832 | ENSP000000100030 | MAPK1           | 110          | 4    | 3   | 5  | 4  | 3   | 1  | 3  | 0  | 4  | 6   | 1  | 2  | 7   | 2   | 7  | 2   | 1   | 6   | 4   | 3   | 6  | 2  | 1  | 1  | 3   | 5   | 3  | 6   | 9   | 3   |     |
| ENSP00000215882 | ENSP000000100075 | SLC25A1         | 81           | 4    | 3   | 3  | 4  | 3   | 3  | 8  | 2  | 2  | 2   | 1  | 1  | 1   | 2   | 2  | 2   | 3   | 2   | 1   | 5   | 3  | 2  | 1  | 2  | 5   | 3   | 4  | 3   | 2   | 2   |     |
| ENSP00000215904 | ENSG00000221912  | PDXP            | 14           | 0    | 0   | 0  | 1  | 0   | 2  | 0  | 0  | 0  | 0   | 0  | 0  | 0   | 0   | 0  | 1   | 1   | 1   | 1   | 0   | 0  | 1  | 0  | 0  | 1   | 1   | 1  | 2   | 0   | 1   |     |
| ENSP00000215909 | ENSG00000100097  | LGALS1          | 174          | 0    | 0   | 0  | 7  | 14  | 9  | 1  | 0  | 0  | 14  | 6  | 16 | 0   | 0   | 0  | 14  | 24  | 18  | 4   | 2   | 0  | 0  | 1  | 0  | 0   | 0   | 0  | 16  | 16  | 13  |     |
| ENSP00000215957 | ENSP00000100139  | MICAL11         | 15           | 0    | 1   | 1  | 1  | 0   | 0  | 0  | 1  | 0  | 0   | 0  | 0  | 0   | 1   | 0  | 0   | 0   | 0   | 0   | 0   | 1  | 1  | 0  | 2  | 0   | 0   | 0  | 2   | 0   | 4   |     |
| ENSP00000216027 | ENSG00000100209  | HSCB            | 22           | 0    | 0   | 0  | 1  | 0   | 0  | 1  | 0  | 0  | 0   | 1  | 0  | 1   | 0   | 0  | 1   | 2   | 1   | 2   | 0   | 2  | 0  | 3  | 0  | 1   | 0   | 0  | 3   | 1   | 2   |     |
| ENSP00000216034 | ENSG00000100216  | TOMM22          | 40           | 0    | 0   | 2  | 0  | 0   | 1  | 1  | 0  | 2  | 7   | 0  | 2  | 0   | 0   | 1  | 1   | 0   | 4   | 0   | 0   | 3  | 2  | 1  | 3  | 3   | 0   | 2  | 3   | 0   | 2   |     |
| ENSP00000216038 | ENSG00000100220  | C22orf28        | 398          | 17   | 11  | 14 | 11 | 15  | 9  | 14 | 9  | 7  | 19  | 4  | 5  | 8   | 10  | 16 | 10  | 16  | 11  | 20  | 12  | 13 | 19 | 7  | 12 | 20  | 21  | 14 | 26  | 12  | 16  |     |
| ENSP00000216044 | ENSG00000100226  | GTPBP1          | 97           | 4    | 2   | 4  | 2  | 2   | 5  | 3  | 2  | 3  | 1   | 0  | 0  | 2   | 0   | 3  | 6   | 4   | 2   | 3   | 3   | 6  | 6  | 1  | 2  | 4   | 7   | 3  | 7   | 5   | 5   |     |
| ENSP00000216064 | ENSP00000100242  | UNC4B           | 75           | 5    | 3   | 1  | 1  | 1   | 1  | 2  | 2  | 2  | 4   | 3  | 3  | 4   | 2   | 4  | 3   | 5   | 4   | 2   | 2   | 5  | 4  | 2  | 3  | 3   | 1   | 1  | 1   | 0   | 1   |     |
| ENSP00000216106 | ENSP00000100281  | HMGXB4          | 11           | 0    | 0   | 1  | 0  | 0   | 1  | 0  | 0  | 1  | 1   | 0  | 1  | 0   | 0   | 0  | 1   | 0   | 0   | 0   | 0   | 0  | 1  | 0  | 1  | 0   | 1   | 0  | 1   | 0   | 1   |     |
| ENSP00000216117 | ENSG00000100292  | HMOX1           | 19           | 4    | 2   | 3  | 1  | 1   | 0  | 0  | 0  | 0  | 0   | 0  | 0  | 1   | 0   | 0  | 1   | 0   | 1   | 0   | 1   | 1  | 1  | 0  | 0  | 0   | 0   | 0  | 0   | 2   | 1   |     |
| ENSP00000216121 | ENSG00000184117  | NIPSNAP1        | 57           | 3    | 1   | 0  | 0  | 2   | 1  | 2  | 0  | 3  | 2   | 0  | 1  | 1   | 0   | 2  | 2   | 5   | 4   | 2   | 1   | 2  | 3  | 0  | 2  | 3   | 2   | 4  | 5   | 1   | 3   |     |
| ENSP00000216122 | ENSG00000100297  | MCMS            | 544          | 20   | 13  | 23 | 14 | 27  | 14 | 16 | 10 | 19 | 36  | 11 | 16 | 22  | 8   | 27 | 17  | 15  | 28  | 16  | 22  | 19 | 13 | 7  | 7  | 26  | 26  | 20 | 18  | 15  | 19  |     |
| ENSP00000216129 | ENSP00000100304  | TTLL12          | 208          | 8    | 6   | 8  | 9  | 15  | 9  | 7  | 7  | 4  | 6   | 0  | 2  | 5   | 6   | 7  | 8   | 7   | 5   | 8   | 8   | 5  | 1  | 1  | 1  | 0   | 16  | 14 | 7   | 9   | 11  | 9   |
| ENSP00000216160 | ENSP00000100324  | MAP3K7IP1       | 55           | 3    | 3   | 2  | 1  | 2   | 1  | 2  | 1  | 1  | 2   | 0  | 0  | 3   | 2   | 1  | 1   | 4   | 4   | 2   | 4   | 0  | 4  | 1  | 0  | 2   | 2   | 0  | 1   | 4   | 2   | 2   |
| ENSP00000216181 | P633L_M          | ENSG00000100345 | MYH9         | 1767 | 100 | 68 | 75 | 47  | 84 | 72 | 52 | 36 | 58  | 60 | 34 | 32  | 46  | 52 | 63  | 52  | 60  | 60  | 43  | 64 | 61 | 77 | 54 | 45  | 83  | 71 | 53  | 66  | 50  | 49  |
| ENSP00000216185 | ENSP00000100348  | TXN2            | 96           | 4    | 2   | 3  | 1  | 4   | 6  | 1  | 2  | 2  | 3   | 0  | 2  | 4   | 1   | 5  | 3   | 1   | 3   | 2   | 0   | 4  | 7  | 2  | 4  | 6   | 5   | 4  | 6   | 5   | 4   |     |
| ENSP00000216187 | ENSP00000100350  | FOXRED2         | 12           | 2    | 2   | 2  | 0  | 0   | 0  | 1  | 0  | 0  | 0   | 0  | 0  | 0   | 1   | 0  | 0   | 0   | 0   | 1   | 2   | 0  | 0  | 0  | 0  | 0   | 0   | 0  | 1   | 0   | 0   | 0   |
| ENSP00000216190 | ENSP00000100353  | E1F3D           | 206          | 4    | 4   | 6  | 7  | 6   | 4  | 7  | 3  | 9  | 7   | 1  | 2  | 11  | 5   | 7  | 10  | 8   | 9   | 13  | 8   | 11 | 5  | 3  | 3  | 16  | 7   | 6  | 10  | 7   | 7   |     |
| ENSP00000216194 | R296Q            | ENSG00000100357 | ADSL         | 62   | 6   | 4  | 2  | 2   | 2  | 2  | 0  | 1  | 1   | 3  | 1  | 0   | 1   | 2  | 1   | 6   | 3   | 4   | 2   | 2  | 2  | 0  | 1  | 0   | 1   | 1  | 1   | 4   | 2   | 5   |
| ENSP00000216225 | A3E              | ENSG00000100387 | RBX1         | 11   | 1   | 0  | 0  | 0   | 0  | 0  | 0  | 0  | 0   | 0  | 1  | 0   | 0   | 1  | 0   | 0   | 0   | 0   | 3   | 1  | 0  | 1  | 0  | 1   | 0   | 0  | 1   | 1   | 0   | 1   |
| ENSP00000216252 | ENSG00000100410  | PFH5A           | 87           | 1    | 4   | 1  | 3  | 4   | 3  | 2  | 4  | 2  | 4   | 4  | 4  | 2   | 4   | 3  | 2   | 3   | 2   | 3   | 2   | 2  | 1  | 5  | 4  | 2   | 2   | 5  | 1   | 4   | 3   | 3   |
| ENSP00000216254 | ENSP00000100412  | ACO2            | 610          | 22   | 20  | 15 | 19 | 32  | 21 | 15 | 12 | 14 | 24  | 15 | 15 | 18  | 16  | 18 | 22  | 20  | 13  | 27  | 21  | 20 | 27 | 25 | 21 | 34  | 27  | 26 | 20  | 18  | 13  |     |
| ENSP00000216254 | R395C_EI         | ENSG00000100412 | ACO2         | 546  | 19  | 19 | 13 | 16  | 28 | 18 | 13 | 12 | 13  | 22 | 12 | 13  | 16  | 13 | 17  | 20  | 18  | 11  | 24  | 18 | 19 | 26 | 24 | 21  | 30  | 24 | 23  | 18  | 15  | 11  |
| ENSP00000216274 | ENSP000001002465 | RIPK3           | 10           | 0    | 0   | 0  | 3  | 0   | 1  | 1  | 0  | 1  | 0   | 0  | 0  | 0   | 0   | 0  | 0   | 0   | 0   | 0   | 0   | 0  | 0  | 0  | 1  | 0   | 1   | 1  | 0   | 0   | 0   | 0   |
| ENSP00000216277 | ENSP00000090060  | PAPOLA          | 139          | 7    | 4   | 6  | 4  | 5   | 7  | 3  | 2  | 3  | 6   | 1  | 2  | 4   | 1   | 4  | 7   | 6   | 6   | 4   | 3   | 6  | 6  | 2  | 2  | 3   | 3   | 5  | 2   | 7   | 6   | 14  |
| ENSP00000216281 | ENSP00000080824  | HSP90AA2_HSI    | 3284         | 95   | 97  | 75 | 80 | 108 | 57 | 84 | 55 | 56 | 104 | 53 | 49 | 123 | 159 | 97 | 159 | 178 | 124 | 139 | 215 | 98 | 91 | 90 | 46 | 125 | 153 | 99 | 180 | 170 | 125 | 125 |
| ENSP00000216288 | ENSP00000075413  | MARK3           | 76           | 3    | 0   | 2  | 2  | 1   | 3  | 3  | 2  | 5  | 0   | 0  | 0  | 2   | 0   | 5  | 2   | 3   | 1   | 3   | 4   | 5  | 4  | 3  | 1  | 3   | 3   | 2  | 8   | 3   | 3   | 3   |
| ENSP00000216297 | ENSP00000092201  | SUPT16HP_SUI    | 575          | 26   | 17  | 13 | 16 | 24  | 11 | 11 | 10 | 13 | 28  | 14 | 11 | 16  | 17  | 16 | 19  | 20  | 22  | 20  | 25  | 26 | 34 | 18 | 15 | 14  | 13  | 11 | 37  | 31  | 27  |     |
| ENSP00000216297 | rs61739          | ENSP00000092201 | SUPT16HP_SUI | 566  | 26  | 17 | 12 | 16  | 24 | 11 | 11 | 10 | 13  | 26 | 14 | 11  | 16  | 17 | 16  | 19  | 20  | 22  | 20  | 25 | 26 | 34 | 18 | 15  | 14  | 13 | 11  | 35  | 31  | 26  |
| ENSP00000216330 | ENSP00000100442  | FKBP3           | 210          | 10   | 14  | 6  | 6  | 11  | 6  | 4  | 6  | 4  | 4   | 7  | 5  | 6   | 13  | 7  | 5   | 6   | 7   | 9   | 16  | 4  | 8  | 5  | 2  | 8   | 7   | 3  | 8   | 10  | 3   |     |
| ENSP00000216373 | ENSP00000100485  | SOS2            | 11           | 0    | 2   | 0  | 0  | 0   | 1  | 1  | 0  | 1  | 0   | 1  | 1  | 0   | 1   | 0  | 0   | 0   | 1   | 0   | 0   | 0  | 0  | 1  | 0  | 0   | 1   | 0  | 0   | 0   | 0   | 0   |
| ENSP00000216392 | ENSG00000100504  | PYGL            | 332          | 14   | 15  | 14 | 5  | 10  | 3  | 15 | 19 | 15 | 7   | 3  | 5  | 2   | 3   | 3  | 25  | 42  | 23  | 6   | 4   | 2  | 7  | 7  | 1  | 8   | 7   | 6  | 23  | 23  | 15  | 15  |
| ENSP00000216407 | ENSG00000100519  | PSMCG           | 262          | 12   | 5   | 12 | 4  | 8   | 7  | 5  | 8  | 7  | 9   | 6  | 10 | 8   | 8   | 9  | 11  | 8   | 6   | 10  | 8   | 10 | 5  | 8  | 5  | 16  | 14  | 11 | 14  | 8   | 10  |     |
| ENSP00000216410 | ENSG00000100522  | GNPNA1          | 108          | 2    | 4   | 1  | 5  | 4   | 9  | 3  | 1  | 3  | 3   | 1  | 0  | 2   | 5   | 0  | 1   | 2   | 3   | 5   | 4   | 6  | 4  | 1  | 1  | 0   | 8   | 3  | 4   | 5   | 4   | 4   |
| ENSP00000216442 | ENSG00000100554  | ATP6V1D         | 47           | 3    | 2   | 0  | 2  | 2   | 1  | 2  | 1  | 1  | 0   | 0  | 2  | 1   | 1   | 2  | 2   | 2   | 0   | 2   | 1   | 2  | 2  | 0  | 0  | 0   | 4   | 4  | 1   | 3   | 3   | 1   |
| ENSP00000216455 | ENSG00000100567  | PSMA3           | 66           | 2    | 2   | 0  | 0  | 1   | 3  | 5  | 3  | 0  | 3   | 0  | 0  | 2   | 0   | 2  | 3   | 1   | 3   | 4   | 2   | 3  | 3  | 0  | 2  | 6   | 3   | 2  | 3   | 6   | 2   | 2   |
| ENSP00000216463 | ENSP00000100575  | TIMM9           | 43           | 2    | 1   | 1  | 2  | 3   | 1  | 2  | 2  | 1  | 2   | 0  | 1  | 2   | 0   | 1  | 1   | 2   | 1   | 1   | 2   | 1  | 2  | 2  | 1  | 1   | 2   | 1  | 2   | 2   | 1   | 1   |
| ENSP00000216465 | ENSP00000100577  | GSTZ1           | 27           | 0    | 0   | 0  | 1  | 2   | 1  | 1  | 0  | 0  | 0   | 0  | 1  | 1   | 0   | 0  | 2   | 2   | 0   | 1   | 3   | 2  | 2  | 1  | 1  | 2   | 2   | 1  | 0   | 2   | 2   | 1   |
| ENSP00000216479 | ENSG00000100591  | AHSA1           | 325          | 15   | 9   | 10 | 10 | 10  | 5  | 10 | 5  | 6  | 7   | 2  | 6  | 13  | 7   | 9  | 12  | 14  | 15  | 16  | 14  | 13 | 13 | 6  | 8  | 15  | 17  | 8  | 23  | 13  | 14  |     |
| ENSP00000216484 | ENSP00000100596  | SPLC2C          | 104          | 4    | 3   | 4  | 2  | 2   | 2  | 3  | 4  | 5  | 3   | 1  | 4  | 4   | 2   | 3  | 4   | 3   | 2   | 2   | 3   | 2  | 7  | 3  | 2  | 4   | 8   | 3  | 5   | 4   | 6   |     |
| ENSP00000216500 | ENSG00000100612  | DHR57           | 64           | 3    | 1   | 1  | 2  | 2   | 1  | 1  | 1  | 2  | 1   | 1  | 0  | 2   | 3   | 2  | 2   | 3   | 2   | 5   | 2   | 2  | 4  | 3  | 2  | 6   | 3   | 2  | 3   | 1   | 1   |     |
| ENSP00000216500 | A326T_V          | ENSG00000100612 | DHR57        | 26   | 1   | 0  | 0  | 0   | 0  | 0  | 0  | 1  | 0   | 0  | 0  | 2   | 1   | 2  | 1   | 0   | 1   | 5   | 1   | 1  | 2  | 1  | 1  | 2   | 2   | 1  | 1   | 0   | 0   | 1   |
| ENSP00000216520 | ENSG00000100632  | ERH             | 162          | 4    | 5   | 2  | 4  | 5   | 3  | 2  | 0  | 4  | 11  | 5  | 4  | 3   | 6   | 5  | 6   | 8   | 5   | 4   | 11  | 5  | 7  | 7  | 7  | 4   | 6   | 6  | 13  | 6   | 4   |     |
| ENSP00000216554 | ENSP00000100664  | E1F5            | 316          | 21   | 12  | 12 | 10 | 7   | 6  | 8  | 3  | 8  | 14  | 5  | 6  | 7   | 9   | 10 | 10  | 14  | 9   | 11  | 13  | 12 | 12 | 14 | 10 | 8   | 13  | 13 | 10  | 10  |     |     |

|                          |                  |           |     |    |    |    |    |    |    |    |    |    |    |    |    |    |    |    |    |    |    |    |    |    |    |    |    |    |    |    |    |    |    |   |
|--------------------------|------------------|-----------|-----|----|----|----|----|----|----|----|----|----|----|----|----|----|----|----|----|----|----|----|----|----|----|----|----|----|----|----|----|----|----|---|
| ENSP00000219240,ENSP000  | ENSG00000102967  | DHODH     | 147 | 9  | 6  | 5  | 5  | 4  | 5  | 6  | 6  | 4  | 4  | 4  | 3  | 2  | 0  | 4  | 6  | 7  | 7  | 5  | 2  | 2  | 3  | 7  | 5  | 4  | 7  | 4  | 9  | 7  | 5  |   |
| ENSP00000219252          | ENSG00000102978  | MOR2C     | 110 | 3  | 0  | 5  | 1  | 3  | 2  | 3  | 4  | 3  | 7  | 0  | 3  | 2  | 0  | 5  | 4  | 6  | 3  | 4  | 7  | 6  | 7  | 1  | 2  | 4  | 5  | 3  | 8  | 6  | 3  |   |
| ENSP00000219302          | ENSG00000103024  | NME3      | 17  | 0  | 0  | 0  | 0  | 0  | 1  | 2  | 1  | 1  | 0  | 0  | 0  | 0  | 0  | 0  | 1  | 1  | 1  | 1  | 1  | 0  | 0  | 0  | 1  | 0  | 3  | 0  | 1  | 1  |    |   |
| ENSP00000219313,ENSP000  | ENSG00000103035  | PSMD7     | 102 | 3  | 4  | 3  | 2  | 2  | 3  | 4  | 0  | 2  | 4  | 0  | 3  | 4  | 0  | 3  | 4  | 4  | 5  | 3  | 4  | 4  | 4  | 2  | 3  | 5  | 5  | 4  | 3  | 8  | 3  | 4 |
| ENSP00000219345          | ENSG00000103066  | PLA2G15   | 12  | 1  | 4  | 1  | 1  | 1  | 0  | 1  | 0  | 0  | 0  | 0  | 0  | 1  | 0  | 1  | 0  | 0  | 0  | 0  | 0  | 1  | 0  | 0  | 0  | 0  | 0  | 0  | 0  | 0  | 0  |   |
| ENSP00000219368,ENSP000  | ENSG00000103089  | FA2H      | 11  | 0  | 0  | 0  | 1  | 1  | 0  | 2  | 1  | 1  | 0  | 0  | 0  | 0  | 0  | 0  | 0  | 0  | 0  | 1  | 0  | 0  | 1  | 0  | 1  | 1  | 0  | 1  | 0  | 0  | 0  |   |
| ENSP00000219400          | ENSG00000103121  | C16orf61  | 60  | 3  | 1  | 2  | 1  | 3  | 1  | 1  | 1  | 1  | 3  | 4  | 1  | 1  | 2  | 1  | 1  | 4  | 1  | 2  | 2  | 1  | 3  | 3  | 2  | 5  | 2  | 2  | 2  | 2  | 2  |   |
| ENSP00000219400,rs11273  | ENSG00000103121  | C16orf61  | 55  | 1  | 1  | 2  | 1  | 3  | 1  | 1  | 1  | 1  | 3  | 3  | 0  | 1  | 2  | 2  | 1  | 4  | 1  | 2  | 3  | 2  | 3  | 3  | 2  | 3  | 2  | 2  | 2  | 1  | 1  |   |
| ENSP00000219439,ENSP000  | ENSG00000103160  | HSDL1     | 21  | 1  | 0  | 1  | 2  | 2  | 1  | 1  | 0  | 0  | 1  | 0  | 0  | 0  | 0  | 1  | 2  | 1  | 1  | 1  | 1  | 1  | 0  | 0  | 0  | 0  | 0  | 0  | 1  | 1  | 1  |   |
| ENSP00000219473          | ENSG00000103194  | USP10     | 163 | 11 | 5  | 7  | 4  | 6  | 6  | 5  | 4  | 5  | 5  | 3  | 4  | 6  | 5  | 6  | 5  | 6  | 7  | 5  | 5  | 4  | 6  | 4  | 5  | 8  | 4  | 6  | 5  | 5  | 6  |   |
| ENSP00000219548          | ENSG00000103266  | STUB1     | 134 | 3  | 3  | 2  | 2  | 1  | 0  | 5  | 2  | 3  | 0  | 4  | 1  | 7  | 7  | 5  | 4  | 4  | 6  | 8  | 9  | 7  | 4  | 5  | 1  | 9  | 9  | 5  | 4  | 7  | 7  |   |
| ENSP00000219627,T571N,rs | ENSG00000103342  | GSP1      | 56  | 3  | 1  | 3  | 2  | 1  | 1  | 1  | 0  | 2  | 2  | 0  | 0  | 0  | 1  | 4  | 4  | 2  | 1  | 2  | 3  | 2  | 1  | 1  | 1  | 1  | 2  | 3  | 1  | 5  | 3  | 4 |
| ENSP00000219700,ENSP000  | ENSG00000103415  | HMOX2     | 77  | 1  | 2  | 1  | 1  | 2  | 1  | 2  | 2  | 2  | 4  | 4  | 2  | 2  | 4  | 8  | 0  | 1  | 2  | 1  | 2  | 3  | 1  | 5  | 1  | 4  | 8  | 3  | 4  | 3  | 1  |   |
| ENSP00000219771,rs99327  | ENSG00000103485  | QPRT      | 12  | 4  | 0  | 2  | 0  | 1  | 1  | 0  | 0  | 0  | 0  | 0  | 0  | 0  | 0  | 0  | 0  | 0  | 1  | 2  | 0  | 3  | 0  | 0  | 0  | 1  | 2  | 0  | 0  | 0  | 0  |   |
| ENSP00000219789          | ENSG00000103502  | CDIPT     | 47  | 2  | 1  | 0  | 0  | 3  | 1  | 4  | 3  | 0  | 2  | 0  | 0  | 2  | 1  | 0  | 2  | 2  | 1  | 2  | 4  | 2  | 1  | 2  | 2  | 2  | 0  | 1  | 3  | 1  | 2  | 1 |
| ENSP00000219794,ENSP000  | ENSG00000103507  | BCKDK     | 23  | 2  | 0  | 0  | 0  | 0  | 0  | 1  | 1  | 0  | 1  | 0  | 1  | 1  | 0  | 1  | 0  | 0  | 1  | 3  | 1  | 1  | 0  | 0  | 0  | 1  | 0  | 0  | 4  | 2  | 2  |   |
| ENSP00000219797,ENSP000  | ENSG00000103510  | MYST1     | 15  | 1  | 0  | 0  | 0  | 0  | 1  | 1  | 2  | 2  | 0  | 0  | 0  | 0  | 0  | 0  | 0  | 1  | 0  | 1  | 2  | 0  | 0  | 0  | 0  | 1  | 1  | 1  | 0  | 0  | 0  | 1 |
| ENSP00000219837,ENSP000  | ENSG00000103550  | C16orf88  | 33  | 0  | 2  | 2  | 1  | 0  | 0  | 1  | 0  | 2  | 3  | 0  | 2  | 2  | 1  | 2  | 0  | 1  | 2  | 3  | 0  | 1  | 0  | 0  | 0  | 2  | 2  | 0  | 3  | 1  | 1  |   |
| ENSP00000219837_P13T     | ENSG00000103550  | C16orf88  | 30  | 0  | 2  | 2  | 0  | 0  | 0  | 0  | 0  | 2  | 3  | 0  | 2  | 2  | 0  | 1  | 2  | 0  | 1  | 3  | 2  | 0  | 1  | 0  | 0  | 0  | 2  | 2  | 0  | 3  | 1  | 1 |
| ENSP00000220003          | ENSG00000103653  | CSK       | 72  | 0  | 0  | 0  | 2  | 6  | 6  | 4  | 5  | 0  | 3  | 0  | 0  | 1  | 3  | 3  | 0  | 3  | 4  | 0  | 0  | 2  | 1  | 1  | 5  | 2  | 3  | 5  | 5  | 4  | 0  |   |
| ENSP00000220166,ENSP000  | ENSG00000103811  | CTSH      | 25  | 2  | 1  | 2  | 2  | 4  | 1  | 2  | 0  | 1  | 0  | 0  | 1  | 0  | 1  | 0  | 1  | 0  | 2  | 0  | 0  | 0  | 1  | 0  | 1  | 1  | 1  | 1  | 0  | 0  | 0  |   |
| ENSP00000220325          | ENSG00000103966  | EHD4      | 357 | 11 | 15 | 8  | 15 | 28 | 17 | 13 | 12 | 11 | 11 | 6  | 6  | 9  | 8  | 12 | 14 | 21 | 10 | 14 | 15 | 9  | 9  | 10 | 9  | 19 | 18 | 6  | 5  | 7  | 9  |   |
| ENSP00000220325_K208N,rs | ENSG00000103966  | EHD4      | 314 | 9  | 14 | 7  | 12 | 25 | 13 | 11 | 10 | 9  | 11 | 9  | 8  | 8  | 7  | 10 | 11 | 17 | 8  | 12 | 14 | 7  | 9  | 9  | 8  | 17 | 18 | 4  | 5  | 6  | 6  |   |
| ENSP00000220496          | ENSG00000104129  | DNAUC17   | 36  | 1  | 1  | 1  | 0  | 0  | 1  | 0  | 1  | 1  | 1  | 1  | 0  | 1  | 3  | 2  | 0  | 1  | 2  | 2  | 1  | 4  | 2  | 1  | 1  | 1  | 1  | 2  | 2  | 1  | 1  |   |
| ENSP00000220509,ENSP000  | ENSG00000104142  | VPS18     | 54  | 3  | 1  | 2  | 2  | 3  | 3  | 4  | 4  | 3  | 0  | 0  | 0  | 0  | 1  | 0  | 2  | 3  | 3  | 3  | 2  | 2  | 3  | 0  | 1  | 3  | 0  | 1  | 2  | 1  | 2  |   |
| ENSP00000220584,ENSP000  | ENSG000001079459 | FDFT1     | 265 | 19 | 9  | 10 | 13 | 13 | 8  | 9  | 1  | 8  | 1  | 0  | 1  | 15 | 4  | 18 | 5  | 3  | 9  | 20 | 19 | 16 | 4  | 3  | 1  | 17 | 16 | 6  | 7  | 4  | 6  |   |
| ENSP00000220592,ENSP000  | ENSG00000123908  | EFC2C     | 71  | 3  | 1  | 5  | 1  | 1  | 5  | 5  | 0  | 5  | 0  | 0  | 0  | 2  | 0  | 1  | 4  | 3  | 3  | 3  | 0  | 5  | 2  | 1  | 1  | 2  | 1  | 3  | 1  | 7  | 6  |   |
| ENSP00000220669          | ENSG00000104231  | ZFAND1    | 16  | 1  | 1  | 0  | 0  | 0  | 0  | 1  | 0  | 1  | 0  | 0  | 0  | 0  | 1  | 0  | 1  | 1  | 1  | 1  | 1  | 1  | 0  | 0  | 0  | 1  | 1  | 0  | 1  | 2  | 0  |   |
| ENSP00000220751,ENSP000  | ENSG00000104312  | RIPK2     | 14  | 0  | 0  | 0  | 1  | 2  | 0  | 0  | 1  | 0  | 0  | 0  | 0  | 0  | 0  | 0  | 0  | 0  | 0  | 0  | 0  | 0  | 0  | 0  | 0  | 0  | 0  | 0  | 4  | 3  | 3  |   |
| ENSP00000220764          | ENSG00000104325  | DECR1     | 183 | 2  | 1  | 4  | 2  | 9  | 10 | 3  | 2  | 5  | 3  | 0  | 3  | 2  | 1  | 5  | 4  | 6  | 3  | 5  | 6  | 4  | 10 | 6  | 9  | 12 | 14 | 13 | 14 | 11 | 14 |   |
| ENSP00000220822,ENSP000  | ENSG00000104381  | HOMER3    | 45  | 0  | 2  | 0  | 0  | 2  | 1  | 0  | 0  | 0  | 2  | 3  | 1  | 3  | 4  | 3  | 3  | 3  | 3  | 0  | 1  | 1  | 2  | 0  | 0  | 0  | 0  | 0  | 3  | 3  | 2  |   |
| ENSP00000220822_I186V    | ENSG00000104381  | GDP1      | 19  | 0  | 0  | 0  | 0  | 0  | 0  | 0  | 0  | 0  | 0  | 1  | 0  | 0  | 3  | 1  | 2  | 1  | 2  | 3  | 1  | 1  | 0  | 0  | 0  | 0  | 0  | 0  | 2  | 0  | 1  |   |
| ENSP00000220847,ENSP000  | ENSG00000129292  | PHF20L1   | 10  | 0  | 0  | 0  | 0  | 0  | 0  | 0  | 0  | 0  | 1  | 1  | 0  | 0  | 0  | 0  | 1  | 0  | 0  | 0  | 0  | 0  | 1  | 2  | 1  | 0  | 0  | 0  | 1  | 0  | 2  |   |
| ENSP00000220849          | ENSG00000104408  | EIF3C     | 407 | 19 | 12 | 15 | 13 | 12 | 7  | 20 | 4  | 12 | 9  | 5  | 10 | 10 | 16 | 12 | 14 | 20 | 21 | 14 | 25 | 15 | 15 | 9  | 4  | 17 | 14 | 12 | 16 | 17 | 18 |   |
| ENSP00000220853          | ENSG00000104412  | TTCS3     | 110 | 4  | 5  | 3  | 4  | 12 | 4  | 7  | 4  | 5  | 3  | 2  | 4  | 4  | 3  | 2  | 3  | 4  | 2  | 6  | 3  | 4  | 1  | 6  | 5  | 2  | 3  | 6  | 2  | 5  | 0  |   |
| ENSP00000220931,ENSP000  | ENSG00000104490  | NCALD     | 39  | 0  | 0  | 0  | 5  | 5  | 3  | 1  | 2  | 1  | 3  | 0  | 1  | 0  | 1  | 2  | 2  | 1  | 1  | 2  | 2  | 2  | 1  | 0  | 0  | 1  | 1  | 1  | 0  | 0  | 1  |   |
| ENSP00000220959,ENSP000  | ENSG00000104517  | UBR5      | 81  | 6  | 0  | 1  | 5  | 2  | 3  | 7  | 2  | 2  | 3  | 1  | 3  | 2  | 2  | 2  | 5  | 3  | 2  | 4  | 3  | 4  | 3  | 1  | 1  | 2  | 3  | 2  | 0  | 4  | 3  |   |
| ENSP00000221114          | ENSG00000104671  | DCTN6     | 13  | 0  | 0  | 1  | 1  | 0  | 1  | 1  | 0  | 0  | 0  | 0  | 0  | 0  | 0  | 2  | 0  | 0  | 2  | 2  | 0  | 0  | 0  | 0  | 0  | 0  | 1  | 1  | 0  | 1  | 0  |   |
| ENSP00000221130          | ENSG00000104687  | GSR       | 82  | 1  | 2  | 2  | 2  | 4  | 5  | 4  | 2  | 1  | 2  | 0  | 1  | 3  | 1  | 1  | 3  | 5  | 5  | 3  | 3  | 1  | 0  | 0  | 2  | 6  | 5  | 10 | 4  | 0  | 1  |   |
| ENSP00000221132,ENSP000  | ENSG00000104689  | TNFRSF10A | 113 | 0  | 0  | 1  | 0  | 0  | 0  | 0  | 0  | 0  | 0  | 0  | 0  | 1  | 0  | 1  | 0  | 2  | 1  | 1  | 2  | 2  | 0  | 0  | 0  | 0  | 1  | 0  | 0  | 1  | 0  |   |
| ENSP00000221138,ENSP000  | ENSG00000104695  | PPP2CB    | 271 | 14 | 4  | 13 | 5  | 8  | 10 | 3  | 2  | 9  | 13 | 0  | 2  | 4  | 3  | 10 | 10 | 9  | 10 | 7  | 17 | 16 | 10 | 3  | 5  | 15 | 14 | 12 | 17 | 13 | 13 |   |
| ENSP00000221222,ENSP000  | ENSG000001051128 | HOMER3    | 12  | 0  | 1  | 0  | 0  | 0  | 0  | 0  | 0  | 0  | 1  | 0  | 1  | 0  | 1  | 0  | 0  | 1  | 3  | 2  | 0  | 0  | 1  | 0  | 0  | 0  | 0  | 1  | 0  | 0  | 0  |   |
| ENSP00000221232,ENSP000  | ENSG000001088038 | CNO3T     | 79  | 4  | 1  | 2  | 3  | 2  | 3  | 5  | 2  | 3  | 2  | 0  | 1  | 1  | 0  | 2  | 4  | 1  | 2  | 5  | 5  | 6  | 1  | 3  | 4  | 3  | 1  | 4  | 2  | 2  | 1  |   |
| ENSP00000221233,ENSP000  | ENSG000001077348 | XOSC5     | 50  | 2  | 4  | 2  | 1  | 2  | 1  | 1  | 1  | 1  | 2  | 2  | 0  | 3  | 2  | 1  | 1  | 2  | 1  | 2  | 3  | 1  | 2  | 2  | 1  | 1  | 2  | 2  | 2  | 1  | 1  |   |
| ENSP00000221249,ENSP000  | ENSG000001032444 | PLNLA     | 77  | 3  | 3  | 3  | 2  | 0  | 5  | 1  | 1  | 2  | 3  | 1  | 2  | 4  | 1  | 4  | 4  | 6  | 3  | 3  | 3  | 4  | 1  | 3  | 1  | 2  | 4  | 3  | 1  | 1  | 3  |   |
| ENSP00000221264,rs23025  | ENSG00000104122  | PAPR      | 29  | 0  | 0  | 0  | 0  | 0  | 0  | 3  | 2  | 0  | 3  | 0  | 1  | 0  | 0  | 1  | 2  | 1  | 2  | 0  | 0  | 0  | 1  | 0  | 1  | 1  | 1  | 0  | 0  | 4  | 4  | 3 |
| ENSP00000221265,ENSP000  | ENSG000001067612 | PAF1      | 178 | 6  | 7  | 6  | 5  | 5  | 4  | 5  | 6  | 4  | 6  | 4  | 4  | 5  | 3  | 4  | 7  | 10 | 6  | 5  | 7  | 7  | 4  | 8  | 11 | 8  | 6  | 7  | 5  | 7  | 7  |   |
| ENSP00000221283,ENSP000  | ENSG000001009944 | STXB2P    | 149 | 8  | 5  | 10 | 2  | 3  | 4  | 3  | 2  | 7  | 4  | 0  | 3  | 4  | 1  | 8  | 4  | 8  | 4  | 3  | 6  | 4  | 9  | 3  | 5  | 13 | 10 | 11 | 2  | 0  | 3  |   |
| ENSP00000221363,ENSP000  | ENSG00000104774  | MAN2B1    | 27  | 2  | 1  | 2  | 1  | 0  | 3  | 0  | 0  | 2  | 3  | 1  | 0  | 1  | 0  | 1  | 1  | 1  | 0  | 1  | 0  | 1  | 0  | 1  | 0  | 0  | 1  | 1  | 1  | 2  | 1  | 0 |
| ENSP00000221413          | ENSG000001083207 | EVH1      | 648 | 25 | 16 | 16 | 19 | 23 | 18 | 25 | 18 | 20 | 27 | 12 | 20 | 13 | 22 | 23 | 33 | 29 | 25 | 25 | 16 | 28 | 12 | 12 | 25 | 25 | 15 | 37 | 29 | 27 | 0  |   |
| ENSP00000221418          | ENSG00000104823  | RUCB1     | 369 | 5  | 2  | 6  | 16 | 24 | 25 | 19 | 11 | 23 | 15 | 6  | 13 | 6  | 2  | 10 | 8  |    |    |    |    |    |    |    |    |    |    |    |    |    |    |   |

|                          |                  |          |      |     |    |    |    |     |    |    |    |     |     |    |    |    |    |    |    |     |    |    |     |    |    |    |    |    |    |    |     |    |    |   |
|--------------------------|------------------|----------|------|-----|----|----|----|-----|----|----|----|-----|-----|----|----|----|----|----|----|-----|----|----|-----|----|----|----|----|----|----|----|-----|----|----|---|
| ENSP00000223321          | ENSG00000106588  | PSMA2    | 87   | 4   | 2  | 3  | 2  | 4   | 2  | 3  | 2  | 3   | 9   | 0  | 1  | 1  | 2  | 3  | 3  | 2   | 1  | 1  | 2   | 6  | 1  | 1  | 3  | 5  | 3  | 3  | 8   | 3  | 4  |   |
| ENSP00000223341,ENSP0000 | ENSG00000106608  |          | 10   | 1   | 0  | 0  | 0  | 0   | 0  | 0  | 1  | 1   | 1   | 0  | 0  | 0  | 0  | 0  | 0  | 0   | 2  | 1  | 1   | 0  | 0  | 0  | 0  | 0  | 0  | 2  | 0   | 0  |    |   |
| ENSP00000223369          | ENSG00000106636  | YKTF     | 80   | 5   | 4  | 5  | 2  | 2   | 1  | 4  | 6  | 2   | 3   | 0  | 1  | 1  | 1  | 2  | 2  | 4   | 3  | 3  | 3   | 2  | 0  | 1  | 4  | 4  | 3  | 2  | 5   | 2  |    |   |
| ENSP00000223500          | ENSG00000008605  | CHMP5    | 91   | 2   | 3  | 3  | 2  | 2   | 1  | 2  | 3  | 4   | 2   | 1  | 2  | 3  | 3  | 3  | 1  | 5   | 2  | 5  | 6   | 5  | 3  | 2  | 3  | 5  | 3  | 6  | 3   | 3  |    |   |
| ENSP00000223641          | ENSG00000106803  | SEC61B   | 68   | 2   | 2  | 1  | 2  | 3   | 2  | 1  | 3  | 3   | 2   | 2  | 1  | 3  | 3  | 2  | 2  | 2   | 2  | 3  | 2   | 2  | 2  | 2  | 2  | 3  | 2  | 3  | 3   | 3  |    |   |
| ENSP00000223836,ENSP0000 | ENSG00000106992  | AK1      | 130  | 3   | 1  | 3  | 0  | 1   | 4  | 0  | 3  | 6   | 4   | 0  | 1  | 0  | 0  | 3  | 5  | 0   | 5  | 0  | 3   | 5  | 5  | 1  | 7  | 16 | 2  | 14 | 19  | 8  | 11 |   |
| ENSP00000223864,ENSP0000 | ENSG00000107020  | C9orf46  | 24   | 0   | 0  | 1  | 2  | 2   | 2  | 1  | 0  | 0   | 0   | 1  | 0  | 0  | 0  | 0  | 0  | 0   | 0  | 0  | 0   | 0  | 2  | 1  | 1  | 2  | 2  | 2  | 0   | 1  |    |   |
| ENSP00000224112,ENSP0000 | ENSG00000107262  | BAG1     | 44   | 0   | 0  | 0  | 3  | 2   | 1  | 1  | 0  | 0   | 0   | 0  | 3  | 1  | 1  | 0  | 1  | 1   | 2  | 2  | 1   | 3  | 2  | 3  | 5  | 3  | 4  | 2  | 1   | 2  |    |   |
| ENSP00000224140,ENSP0000 | ENSG00000107290  | SETX     | 36   | 2   | 0  | 0  | 2  | 0   | 2  | 4  | 0  | 3   | 2   | 2  | 1  | 1  | 1  | 2  | 0  | 1   | 1  | 3  | 0   | 0  | 0  | 1  | 0  | 1  | 0  | 2  | 0   | 4  |    |   |
| ENSP00000224237          | ENSG00000206205  | VIM      | 455  | 36  | 32 | 24 | 0  | 1   | 2  | 3  | 3  | 125 | 93  | 89 | 0  | 2  | 1  | 0  | 1  | 2   | 2  | 1  | 2   | 17 | 13 | 1  | 1  | 0  | 2  | 0  | 0   | 0  |    |   |
| ENSP00000224652          | ENSG00000107669  | ATE1     | 54   | 6   | 2  | 2  | 1  | 1   | 2  | 0  | 0  | 0   | 0   | 0  | 0  | 2  | 0  | 1  | 2  | 3   | 2  | 2  | 3   | 1  | 1  | 0  | 5  | 3  | 5  | 6  | 0   | 1  |    |   |
| ENSP00000224652_S150R    | ENSG00000107669  | ATE1     | 52   | 5   | 2  | 2  | 1  | 1   | 2  | 0  | 0  | 0   | 0   | 0  | 0  | 2  | 0  | 1  | 2  | 2   | 2  | 3  | 3   | 1  | 1  | 0  | 5  | 2  | 5  | 6  | 0   | 1  |    |   |
| ENSP00000224738          | ENSG00000107796  | ACTA2    | 229  | 115 | 96 | 51 | 42 | 129 | 29 | 99 | 43 | 43  | 154 | 37 | 55 | 44 | 45 | 52 | 97 | 275 | 63 | 44 | 177 | 58 | 99 | 72 | 53 | 46 | 52 | 24 | 123 | 73 | 49 |   |
| ENSP00000224807,ENSP0000 | ENSG00000107819  | SFXN3    | 57   | 2   | 1  | 2  | 0  | 4   | 3  | 1  | 2  | 2   | 2   | 1  | 3  | 2  | 1  | 2  | 0  | 2   | 1  | 1  | 1   | 2  | 3  | 0  | 1  | 3  | 1  | 0  | 7   | 6  | 1  |   |
| ENSP00000224849_rs6901:C | ENSG00000107959  | PITRM1   | 116  | 8   | 6  | 4  | 4  | 5   | 4  | 6  | 5  | 2   | 1   | 4  | 0  | 2  | 1  | 3  | 2  | 3   | 1  | 2  | 5   | 1  | 8  | 7  | 4  | 7  | 5  | 3  | 5   | 6  | 2  |   |
| ENSP00000224949_rs6901:C | ENSG00000107959  | PITRM1   | 138  | 9   | 7  | 5  | 5  | 6   | 4  | 5  | 6  | 3   | 2   | 4  | 0  | 2  | 1  | 4  | 2  | 4   | 2  | 3  | 7   | 2  | 11 | 8  | 4  | 7  | 6  | 2  | 6   | 8  | 3  |   |
| ENSP00000225174          | ENSG00000108179  | PIPF     | 39   | 14  | 14 | 13 | 12 | 16  | 12 | 11 | 8  | 10  | 14  | 5  | 9  | 11 | 8  | 10 | 12 | 17  | 10 | 14 | 10  | 13 | 21 | 18 | 16 | 13 | 17 | 10 | 19  | 20 | 13 |   |
| ENSP00000225235          | ENSG00000108239  | TBC1D12  | 190  | 4   | 1  | 0  | 0  | 0   | 0  | 0  | 0  | 0   | 1   | 1  | 0  | 0  | 1  | 1  | 0  | 0   | 0  | 0  | 1   | 0  | 2  | 0  | 0  | 0  | 0  | 0  | 0   | 0  | 0  |   |
| ENSP00000225282,ENSP0000 | ENSG00000073969  | NSF      | 311  | 18  | 8  | 8  | 16 | 17  | 16 | 8  | 11 | 6   | 7   | 3  | 6  | 9  | 10 | 9  | 13 | 13  | 12 | 14 | 12  | 8  | 8  | 5  | 5  | 18 | 13 | 10 | 11  | 8  | 9  |   |
| ENSP00000225296,ENSP0000 | ENSG00000000051  | HDX33    | 38   | 1   | 1  | 2  | 1  | 0   | 0  | 4  | 0  | 0   | 3   | 2  | 1  | 2  | 1  | 0  | 2  | 1   | 0  | 2  | 1   | 1  | 2  | 3  | 0  | 1  | 1  | 2  | 1   | 1  |    |   |
| ENSP00000225298_M238L    | ENSG00000101260  | UTP18    | 53   | 3   | 0  | 1  | 0  | 1   | 1  | 0  | 0  | 1   | 6   | 0  | 3  | 2  | 0  | 2  | 4  | 2   | 3  | 2  | 0   | 1  | 3  | 1  | 2  | 3  | 1  | 5  | 1   | 4  |    |   |
| ENSP00000225388,ENSP0000 | ENSG00000108256  | NUFIP2   | 120  | 6   | 6  | 5  | 5  | 1   | 3  | 1  | 2  | 4   | 1   | 1  | 5  | 8  | 4  | 1  | 7  | 5   | 6  | 10 | 5   | 1  | 2  | 0  | 5  | 3  | 5  | 4  | 6   | 3  |    |   |
| ENSP00000225394,ENSP0000 | ENSG00000108262  | GIT1     | 69   | 2   | 1  | 1  | 4  | 1   | 2  | 2  | 1  | 3   | 1   | 0  | 1  | 2  | 2  | 1  | 2  | 5   | 4  | 5  | 4   | 1  | 1  | 2  | 1  | 5  | 1  | 3  | 2   | 5  | 4  |   |
| ENSP00000225402,ENSP0000 | ENSG00000108270  | AATF     | 90   | 6   | 3  | 2  | 0  | 0   | 1  | 3  | 0  | 3   | 6   | 2  | 4  | 2  | 3  | 2  | 3  | 2   | 4  | 1  | 2   | 3  | 6  | 5  | 3  | 2  | 4  | 5  | 8   | 3  | 2  |   |
| ENSP00000225426          | ENSG00000108294  | PSMB3    | 97   | 2   | 2  | 5  | 1  | 3   | 3  | 2  | 2  | 3   | 7   | 0  | 3  | 3  | 2  | 3  | 4  | 5   | 3  | 2  | 3   | 2  | 2  | 4  | 5  | 5  | 4  | 5  | 5   | 4  |    |   |
| ENSP00000225428,ENSP0000 | ENSG00000108296  | CCDC49   | 33   | 2   | 0  | 0  | 2  | 2   | 2  | 3  | 0  | 1   | 1   | 0  | 0  | 1  | 1  | 1  | 0  | 2   | 1  | 0  | 0   | 1  | 1  | 2  | 1  | 2  | 1  | 1  | 1   | 3  | 1  |   |
| ENSP00000225430,ENSP0000 | ENSG00000201827  |          | 335  | 16  | 11 | 7  | 9  | 15  | 8  | 10 | 15 | 8   | 13  | 3  | 6  | 5  | 16 | 11 | 14 | 14  | 13 | 12 | 13  | 11 | 18 | 7  | 9  | 12 | 20 | 10 | 8   | 13 | 8  |   |
| ENSP00000225525          | ENSG000002013977 | TAX1BP3  | 37   | 1   | 2  | 1  | 1  | 1   | 1  | 2  | 1  | 1   | 0   | 1  | 0  | 2  | 2  | 0  | 0  | 1   | 1  | 1  | 2   | 2  | 2  | 1  | 0  | 2  | 2  | 1  | 1   | 2  | 1  |   |
| ENSP00000225550          | ENSG00000108417  | KRT37    | 10   | 0   | 0  | 0  | 0  | 1   | 1  | 0  | 0  | 0   | 3   | 0  | 4  | 0  | 1  | 0  | 0  | 0   | 0  | 0  | 0   | 0  | 0  | 0  | 0  | 0  | 0  | 0  | 0   | 0  | 0  |   |
| ENSP00000225573          | ENSG00000108439  | PNPO     | 78   | 4   | 2  | 2  | 4  | 3   | 3  | 4  | 2  | 1   | 1   | 0  | 0  | 3  | 0  | 2  | 3  | 4   | 3  | 3  | 2   | 0  | 0  | 2  | 7  | 7  | 3  | 5  | 2   | 3  |    |   |
| ENSP00000225603,ENSP0000 | ENSG00000108468  | CBX1     | 436  | 35  | 22 | 10 | 6  | 20  | 9  | 8  | 3  | 9   | 30  | 14 | 10 | 8  | 15 | 11 | 12 | 19  | 13 | 10 | 16  | 10 | 15 | 14 | 9  | 21 | 18 | 9  | 21  | 23 | 16 |   |
| ENSP00000225614          | ENSG00000108479  | GALK1    | 141  | 10  | 9  | 8  | 4  | 5   | 7  | 2  | 1  | 2   | 0   | 0  | 0  | 4  | 3  | 11 | 8  | 5   | 5  | 3  | 7   | 2  | 5  | 12 | 7  | 5  | 3  | 3  | 2   | 3  |    |   |
| ENSP00000225655          | ENSG00000108518  | PFN1     | 502  | 9   | 7  | 11 | 2  | 37  | 16 | 5  | 7  | 14  | 22  | 1  | 7  | 15 | 6  | 12 | 18 | 36  | 21 | 12 | 36  | 22 | 14 | 7  | 8  | 32 | 19 | 18 | 44  | 27 | 17 |   |
| ENSP00000225665          | ENSG00000108528  | SLC25A11 | 63   | 1   | 2  | 2  | 2  | 3   | 2  | 3  | 0  | 1   | 3   | 1  | 2  | 1  | 0  | 2  | 2  | 2   | 2  | 5  | 1   | 6  | 2  | 1  | 2  | 4  | 3  | 3  | 2   | 1  | 2  |   |
| ENSP00000225696_A311V,S  | ENSG00000108559  | NUP88    | 163  | 7   | 5  | 4  | 4  | 5   | 3  | 5  | 8  | 5   | 12  | 8  | 4  | 3  | 8  | 6  | 3  | 6   | 2  | 7  | 2   | 3  | 8  | 5  | 5  | 6  | 5  | 8  | 7   | 6  |    |   |
| ENSP00000225698          | ENSG00000108561  | C1QBp    | 495  | 13  | 7  | 12 | 9  | 16  | 12 | 15 | 9  | 17  | 23  | 8  | 12 | 10 | 9  | 16 | 17 | 27  | 19 | 15 | 19  | 23 | 30 | 16 | 30 | 19 | 10 | 33 | 18  | 15 |    |   |
| ENSP00000225719,ENSP0000 | ENSG00000108582  | CPD      | 170  | 17  | 15 | 13 | 7  | 9   | 8  | 9  | 15 | 6   | 2   | 2  | 1  | 2  | 1  | 7  | 14 | 7   | 3  | 2  | 9   | 1  | 6  | 1  | 2  | 0  | 1  | 1  | 1   | 1  | 1  |   |
| ENSP00000225724          | ENSG00000108587  | GOSR1    | 10   | 1   | 0  | 0  | 2  | 3   | 1  | 0  | 6  | 5   | 4   | 0  | 0  | 0  | 0  | 0  | 0  | 0   | 0  | 0  | 0   | 0  | 0  | 0  | 0  | 0  | 0  | 0  | 0   | 0  | 0  |   |
| ENSP00000225726,ENSP0000 | ENSG00000108588  | CCDC47   | 199  | 10  | 11 | 4  | 5  | 5   | 4  | 1  | 6  | 5   | 4   | 4  | 7  | 7  | 6  | 6  | 7  | 8   | 10 | 4  | 6   | 9  | 5  | 10 | 9  | 5  | 8  | 7  | 5   | 5  |    |   |
| ENSP00000225726_R45S,M   | ENSG00000108588  | CCDC47   | 203  | 10  | 11 | 4  | 5  | 5   | 4  | 6  | 5  | 4   | 4   | 7  | 6  | 7  | 7  | 8  | 10 | 4   | 6  | 11 | 7   | 10 | 9  | 5  | 9  | 5  | 7  | 8  | 7   | 5  |    |   |
| ENSP00000225729,ENSP0000 | ENSG00000108591  | DRG2     | 68   | 5   | 3  | 5  | 2  | 2   | 4  | 2  | 0  | 1   | 2   | 0  | 1  | 1  | 1  | 1  | 3  | 1   | 2  | 2  | 3   | 2  | 4  | 0  | 1  | 2  | 2  | 5  | 5   | 3  | 4  |   |
| ENSP00000225740,ENSP0000 | ENSG00000108602  | ALDH3A1  | 113  | 1   | 0  | 1  | 18 | 30  | 30 | 2  | 1  | 1   | 0   | 0  | 0  | 3  | 3  | 2  | 0  | 0   | 0  | 0  | 5   | 4  | 5  | 2  | 0  | 0  | 1  | 4  | 0   | 0  | 0  |   |
| ENSP00000225742,ENSP0000 | ENSG00000108604  | SMARCD2  | 703  | 2   | 1  | 2  | 3  | 2   | 3  | 6  | 4  | 5   | 4   | 6  | 7  | 3  | 2  | 2  | 5  | 4   | 4  | 5  | 2   | 3  | 1  | 3  | 3  | 5  | 6  | 6  | 2   | 1  | 1  |   |
| ENSP00000225777          | ENSG00000108639  | SYNGR2   | 70   | 4   | 1  | 1  | 3  | 5   | 1  | 4  | 2  | 2   | 2   | 0  | 1  | 2  | 1  | 2  | 2  | 3   | 2  | 4  | 3   | 1  | 4  | 1  | 1  | 4  | 4  | 4  | 2   | 3  | 1  |   |
| ENSP00000225792,ENSP0000 | ENSG00000108654  | DDX5     | 1529 | 49  | 53 | 46 | 48 | 58  | 41 | 57 | 30 | 67  | 39  | 38 | 44 | 57 | 44 | 63 | 66 | 47  | 63 | 59 | 48  | 55 | 63 | 39 | 49 | 69 | 40 | 58 | 75  | 46 |    |   |
| ENSP00000225805          | ENSG00000108666  | C17orf75 | 11   | 0   | 0  | 0  | 0  | 0   | 1  | 1  | 0  | 2   | 0   | 0  | 0  | 1  | 0  | 1  | 0  | 1   | 1  | 0  | 1   | 1  | 0  | 1  | 0  | 0  | 0  | 0  | 0   | 0  | 0  |   |
| ENSP00000225916,ENSP0000 | ENSG00000108773  | KAT2A    | 16   | 0   | 0  | 0  | 0  | 0   | 2  | 0  | 0  | 1   | 1   | 1  | 0  | 0  | 0  | 0  | 0  | 0   | 0  | 1  | 0   | 1  | 0  | 0  | 1  | 3  | 2  | 1  | 0   | 0  | 1  |   |
| ENSP00000225927,ENSP0000 | ENSG00000108784  | NAGLU    | 19   | 0   | 1  | 0  | 2  | 1   | 2  | 3  | 0  | 2   | 2   | 0  | 1  | 0  | 0  | 0  | 0  | 0   | 0  | 1  | 1   | 0  | 1  | 0  | 1  | 0  | 0  | 0  | 0   | 0  | 1  | 0 |
| ENSP00000225969,ENSP0000 | ENSG00000108826  | MRPL27   | 39   | 1   | 1  | 0  | 1  | 1   | 1  | 1  | 1  | 1   | 1   | 2  | 1  | 1  | 2  | 1  | 3  | 2   | 3  | 2  | 2   | 2  | 1  | 2  | 1  | 1  | 1  | 1  | 1   | 0  | 0  |   |
| ENSP00000225972          | ENSG00000108829  | LRRC5    | 299  | 13  | 14 | 16 | 6  | 13  | 9  | 5  | 9  | 5   | 9   | 8  | 5  | 8  | 12 | 6  | 16 | 18  | 4  | 13 | 10  | 9  | 9  | 7  | 12 | 11 | 10 | 12 | 10  | 12 |    |   |
| ENSP00000226004          | ENSG00000108861  | DUSP3    | 31   | 1   | 2  | 2  | 2  | 1   | 1  | 1  | 1  | 1   | 0   | 0  | 0  | 1  | 0  | 1  | 2  | 1   | 0  | 2  | 0   | 1  | 0  | 0  | 0  | 0  | 1  | 1  | 2   | 3  | 1  |   |
| ENSP00000226218,ENSP0000 | ENSG00000109072  | VTN      | 12   | 5   |    |    |    |     |    |    |    |     |     |    |    |    |    |    |    |     |    |    |     |    |    |    |    |    |    |    |     |    |    |   |

|                          |                  |              |     |    |    |    |    |    |    |    |    |    |    |    |    |    |    |    |    |    |    |    |    |    |    |    |    |    |    |    |    |    |    |   |
|--------------------------|------------------|--------------|-----|----|----|----|----|----|----|----|----|----|----|----|----|----|----|----|----|----|----|----|----|----|----|----|----|----|----|----|----|----|----|---|
| ENSP00000229390          | ENSG00000111786  | SFRS9        | 352 | 11 | 17 | 8  | 7  | 15 | 7  | 10 | 10 | 6  | 9  | 14 | 6  | 9  | 13 | 12 | 12 | 18 | 10 | 12 | 15 | 9  | 22 | 20 | 11 | 10 | 12 | 6  | 15 | 18 | 8  |   |
| ENSP00000229390_Y35F     | ENSG00000111786  | SFRS9        | 267 | 8  | 9  | 6  | 5  | 11 | 5  | 5  | 5  | 4  | 7  | 10 | 14 | 10 | 11 | 12 | 9  | 13 | 8  | 12 | 18 | 9  | 16 | 13 | 8  | 8  | 7  | 4  | 12 | 12 | 6  |   |
| ENSP00000229416          | ENSG00000100184  | GLC1         | 160 | 7  | 6  | 4  | 11 | 13 | 10 | 9  | 3  | 2  | 0  | 0  | 0  | 1  | 0  | 2  | 9  | 14 | 8  | 3  | 4  | 1  | 6  | 0  | 2  | 11 | 12 | 9  | 5  | 4  | 4  |   |
| ENSP00000229446_S220N    | ENSG00000202963  | BCLAF1       | 201 | 8  | 6  | 4  | 6  | 6  | 4  | 8  | 3  | 5  | 11 | 6  | 5  | 5  | 3  | 7  | 5  | 7  | 4  | 8  | 6  | 5  | 14 | 4  | 10 | 14 | 7  | 7  | 12 | 7  | 4  |   |
| ENSP00000229471_ENSP0000 | ENSG00000010810  | RYN          | 71  | 2  | 5  | 2  | 1  | 5  | 1  | 3  | 4  | 2  | 3  | 2  | 1  | 2  | 3  | 2  | 0  | 3  | 1  | 3  | 3  | 2  | 2  | 3  | 2  | 3  | 2  | 2  | 2  | 3  | 2  |   |
| ENSP00000229633          | ENSG00000111911  | HINT3        | 20  | 0  | 1  | 0  | 0  | 1  | 1  | 0  | 1  | 0  | 0  | 1  | 1  | 1  | 1  | 1  | 1  | 0  | 1  | 0  | 0  | 1  | 0  | 2  | 1  | 1  | 2  | 2  | 0  | 1  | 0  | 0 |
| ENSP00000229707_ENSP0000 | ENSG00000206395  | DDAH2        | 60  | 3  | 4  | 9  | 1  | 0  | 1  | 1  | 3  | 3  | 4  | 5  | 2  | 2  | 0  | 0  | 0  | 1  | 2  | 2  | 2  | 1  | 3  | 3  | 0  | 0  | 0  | 1  | 0  | 6  | 1  | 4 |
| ENSP00000229715_ENSP0000 | ENSG000001172850 |              | 117 | 3  | 0  | 3  | 2  | 2  | 2  | 3  | 1  | 4  | 6  | 0  | 4  | 2  | 0  | 4  | 6  | 6  | 6  | 3  | 3  | 8  | 11 | 0  | 7  | 7  | 4  | 4  | 8  | 3  | 5  |   |
| ENSP00000229725_ENSP0000 | ENSG00000206270  |              | 22  | 3  | 0  | 3  | 0  | 2  | 2  | 0  | 1  | 1  | 1  | 0  | 0  | 0  | 0  | 0  | 1  | 0  | 0  | 0  | 0  | 0  | 3  | 1  | 1  | 2  | 1  | 0  | 0  | 0  | 0  |   |
| ENSP00000229729_ENSP0000 | ENSG00000206269  | SLC44A4      | 15  | 0  | 0  | 0  | 0  | 1  | 0  | 4  | 2  | 2  | 0  | 0  | 0  | 0  | 0  | 0  | 0  | 0  | 0  | 0  | 0  | 0  | 1  | 0  | 0  | 3  | 2  | 0  | 0  | 0  | 0  |   |
| ENSP00000229735_ENSP0000 | ENSG00000206376  |              | 23  | 2  | 0  | 0  | 1  | 0  | 0  | 0  | 2  | 1  | 0  | 1  | 0  | 1  | 0  | 2  | 0  | 2  | 0  | 2  | 0  | 1  | 0  | 2  | 1  | 1  | 1  | 1  | 1  | 0  | 3  |   |
| ENSP00000229795          | ENSG00000112062  | MAPK14       | 46  | 3  | 1  | 3  | 1  | 1  | 4  | 2  | 0  | 0  | 1  | 0  | 0  | 0  | 1  | 1  | 2  | 1  | 1  | 5  | 1  | 1  | 2  | 1  | 1  | 2  | 2  | 1  | 5  | 2  |    |   |
| ENSP00000229812_ENSP0000 | ENSG00000112079  | STK38        | 10  | 0  | 0  | 0  | 1  | 0  | 0  | 1  | 1  | 0  | 0  | 0  | 0  | 2  | 0  | 0  | 0  | 1  | 1  | 2  | 1  | 2  | 0  | 0  | 0  | 0  | 0  | 0  | 0  | 0  | 0  |   |
| ENSP00000229854          | ENSG00000112118  | MCM3         | 712 | 30 | 25 | 26 | 26 | 42 | 22 | 22 | 20 | 18 | 34 | 13 | 21 | 28 | 19 | 19 | 27 | 21 | 25 | 28 | 29 | 24 | 20 | 11 | 7  | 32 | 26 | 22 | 28 | 25 | 22 |   |
| ENSP00000230048_ENSP0000 | ENSG00000112304  | THEM2        | 33  | 1  | 0  | 1  | 1  | 1  | 1  | 2  | 3  | 1  | 1  | 0  | 2  | 1  | 0  | 0  | 1  | 1  | 2  | 1  | 0  | 2  | 1  | 0  | 1  | 2  | 2  | 1  | 2  | 1  | 1  |   |
| ENSP00000230050_ENSP0000 | ENSG00000112306  | RPS12P9,RPS1 | 286 | 15 | 12 | 5  | 4  | 11 | 5  | 10 | 9  | 6  | 8  | 10 | 3  | 10 | 21 | 7  | 11 | 14 | 5  | 7  | 19 | 5  | 10 | 14 | 6  | 11 | 12 | 6  | 13 | 13 | 4  |   |
| ENSP00000230085_ENSP0000 | ENSG00000112335  | SNX3         | 79  | 3  | 2  | 4  | 3  | 4  | 1  | 2  | 1  | 2  | 3  | 1  | 2  | 1  | 2  | 4  | 2  | 2  | 3  | 3  | 5  | 4  | 3  | 1  | 2  | 4  | 3  | 3  | 3  | 3  | 3  |   |
| ENSP00000230122          | ENSG00000112365  | ZBTB24       | 13  | 0  | 1  | 0  | 0  | 3  | 1  | 1  | 0  | 0  | 0  | 1  | 0  | 1  | 0  | 0  | 0  | 1  | 0  | 0  | 0  | 0  | 0  | 1  | 0  | 1  | 1  | 0  | 0  | 1  | 0  |   |
| ENSP00000230323_ENSP0000 | ENSG00000112561  | TFEF         | 13  | 1  | 0  | 0  | 4  | 2  | 0  | 1  | 0  | 0  | 0  | 0  | 0  | 0  | 0  | 0  | 0  | 0  | 0  | 1  | 0  | 0  | 0  | 1  | 0  | 1  | 0  | 2  | 0  | 0  | 1  | 0 |
| ENSP00000230340_ENSP0000 | ENSG00000112578  | BSYL         | 134 | 5  | 4  | 3  | 8  | 6  | 4  | 6  | 3  | 1  | 4  | 6  | 3  | 4  | 7  | 4  | 3  | 6  | 5  | 6  | 5  | 2  | 4  | 5  | 4  | 6  | 4  | 2  | 5  | 4  | 5  |   |
| ENSP00000230402          | ENSG00000112640  | PPP2R5D      | 126 | 4  | 5  | 5  | 2  | 6  | 3  | 5  | 5  | 3  | 2  | 1  | 2  | 2  | 4  | 2  | 2  | 8  | 4  | 6  | 9  | 4  | 2  | 4  | 2  | 7  | 9  | 2  | 3  | 7  | 6  |   |
| ENSP00000230418          | ENSG00000112655  | PTK7         | 32  | 5  | 0  | 3  | 0  | 0  | 0  | 0  | 0  | 0  | 2  | 0  | 1  | 0  | 1  | 0  | 1  | 4  | 2  | 4  | 2  | 4  | 1  | 0  | 0  | 1  | 0  | 0  | 1  | 0  | 0  |   |
| ENSP00000230419_ENSP0000 | ENSG00000112655  | PTK7         | 105 | 11 | 5  | 9  | 1  | 0  | 0  | 0  | 0  | 0  | 5  | 1  | 3  | 4  | 4  | 4  | 6  | 8  | 8  | 8  | 7  | 9  | 1  | 1  | 0  | 1  | 0  | 0  | 4  | 3  | 2  |   |
| ENSP00000230449          | ENSG00000112685  | EXOC2        | 99  | 5  | 4  | 2  | 7  | 4  | 3  | 4  | 6  | 1  | 0  | 0  | 2  | 4  | 1  | 0  | 4  | 6  | 2  | 2  | 3  | 4  | 6  | 3  | 2  | 6  | 8  | 1  | 3  | 2  | 4  |   |
| ENSP00000230459_ENSP0000 | ENSG00000112695  | COX7A2       | 125 | 5  | 2  | 3  | 2  | 6  | 5  | 2  | 3  | 1  | 4  | 2  | 4  | 2  | 2  | 3  | 7  | 6  | 3  | 4  | 6  | 4  | 4  | 5  | 6  | 7  | 7  | 4  | 6  | 6  | 4  |   |
| ENSP00000230510_ENSP0000 | ENSG00000112742  | TTK          | 21  | 2  | 0  | 0  | 0  | 0  | 0  | 1  | 0  | 0  | 1  | 4  | 0  | 0  | 3  | 2  | 1  | 0  | 0  | 0  | 2  | 2  | 0  | 0  | 1  | 1  | 0  | 0  | 0  | 0  | 0  | 1 |
| ENSP00000230731_ENSP0000 | ENSG00000068796  | SKIV2L2      | 325 | 15 | 2  | 7  | 12 | 12 | 9  | 12 | 2  | 10 | 15 | 4  | 5  | 13 | 3  | 10 | 10 | 13 | 10 | 16 | 8  | 12 | 24 | 11 | 11 | 13 | 16 | 7  | 17 | 14 | 12 |   |
| ENSP00000230731_ENSP0000 | ENSG00000068796  | KIF2A        | 185 | 6  | 8  | 8  | 9  | 8  | 6  | 8  | 9  | 5  | 4  | 3  | 3  | 5  | 5  | 8  | 4  | 7  | 4  | 8  | 10 | 5  | 5  | 7  | 5  | 5  | 8  | 2  | 7  | 8  | 7  |   |
| ENSP00000230771          | ENSG00000112855  |              | 299 | 10 | 8  | 8  | 12 | 18 | 12 | 11 | 4  | 5  | 8  | 5  | 10 | 6  | 6  | 5  | 10 | 13 | 13 | 11 | 10 | 9  | 9  | 8  | 7  | 9  | 18 | 9  | 19 | 15 | 11 |   |
| ENSP00000230792          | ENSG00000112874  | NUDT12       | 13  | 0  | 0  | 0  | 1  | 3  | 0  | 1  | 0  | 0  | 0  | 0  | 0  | 0  | 0  | 0  | 0  | 0  | 1  | 1  | 0  | 0  | 1  | 1  | 0  | 3  | 0  | 1  | 0  | 0  | 0  |   |
| ENSP00000230901_ENSP0000 | ENSG00000112983  | BRD8         | 28  | 4  | 0  | 1  | 1  | 0  | 1  | 2  | 0  | 0  | 2  | 1  | 0  | 2  | 0  | 1  | 0  | 0  | 0  | 2  | 1  | 2  | 2  | 2  | 2  | 0  | 0  | 1  | 0  | 0  | 1  | 0 |
| ENSP00000230901_rs11750i | ENSG00000112983  | BRD8         | 28  | 4  | 0  | 1  | 1  | 0  | 1  | 2  | 0  | 0  | 1  | 1  | 0  | 2  | 0  | 1  | 0  | 0  | 0  | 2  | 1  | 2  | 2  | 2  | 3  | 0  | 0  | 1  | 0  | 0  | 1  | 0 |
| ENSP00000230902_ENSP0000 | ENSG00000112984  | KIF20A       | 32  | 3  | 5  | 3  | 0  | 0  | 0  | 2  | 0  | 0  | 0  | 3  | 1  | 0  | 3  | 1  | 1  | 0  | 0  | 3  | 3  | 0  | 0  | 2  | 2  | 0  | 0  | 0  | 1  | 0  | 0  | 1 |
| ENSP00000230914          | ENSG00000112996  | MRPS30       | 73  | 4  | 2  | 2  | 3  | 3  | 2  | 4  | 2  | 3  | 3  | 2  | 3  | 2  | 2  | 2  | 2  | 3  | 2  | 3  | 1  | 2  | 3  | 1  | 3  | 4  | 2  | 3  | 3  | 1  | 2  |   |
| ENSP00000231198_ENSP0000 | ENSG00000113272  | THG1L        | 22  | 0  | 2  | 1  | 1  | 0  | 0  | 0  | 2  | 0  | 3  | 0  | 0  | 0  | 0  | 1  | 0  | 1  | 1  | 0  | 0  | 1  | 3  | 1  | 0  | 2  | 0  | 0  | 1  | 0  | 2  | 0 |
| ENSP00000231238          | ENSG00000113312  | TTC1         | 68  | 1  | 3  | 4  | 2  | 0  | 1  | 2  | 0  | 4  | 2  | 0  | 0  | 0  | 2  | 2  | 4  | 2  | 2  | 2  | 8  | 4  | 4  | 1  | 0  | 1  | 2  | 1  | 2  | 4  | 5  | 3 |
| ENSP00000231238_rs41275i | ENSG00000113312  | TTC1         | 48  | 1  | 2  | 3  | 1  | 0  | 1  | 0  | 1  | 3  | 1  | 0  | 0  | 1  | 2  | 2  | 2  | 2  | 1  | 6  | 1  | 2  | 1  | 0  | 1  | 2  | 1  | 2  | 4  | 4  | 2  |   |
| ENSP00000231368_ENSP0000 | ENSG00000113441  | LNPEP        | 121 | 3  | 0  | 4  | 5  | 6  | 7  | 3  | 6  | 3  | 12 | 1  | 5  | 2  | 3  | 2  | 6  | 4  | 2  | 2  | 3  | 4  | 6  | 2  | 7  | 7  | 4  | 0  | 3  | 2  | 7  |   |
| ENSP00000231487          | ENSG00000113558  | SKP1         | 178 | 13 | 6  | 11 | 3  | 4  | 4  | 5  | 5  | 5  | 6  | 2  | 3  | 6  | 7  | 3  | 5  | 9  | 4  | 9  | 8  | 8  | 5  | 5  | 5  | 8  | 5  | 6  | 6  | 10 | 7  |   |
| ENSP00000231498_ENSP0000 | ENSG00000113569  | NUP155       | 263 | 13 | 8  | 6  | 11 | 9  | 10 | 12 | 5  | 7  | 12 | 4  | 4  | 9  | 5  | 10 | 13 | 8  | 10 | 10 | 6  | 8  | 15 | 5  | 6  | 14 | 8  | 7  | 12 | 6  | 10 |   |
| ENSP00000231504          | ENSG00000113575  | PP2CA        | 298 | 14 | 4  | 13 | 6  | 10 | 11 | 4  | 3  | 11 | 15 | 0  | 3  | 4  | 3  | 12 | 10 | 10 | 12 | 8  | 18 | 16 | 13 | 3  | 7  | 16 | 14 | 13 | 19 | 12 | 14 |   |
| ENSP00000231572_G182E    | ENSG00000113643  | RARS         | 838 | 44 | 30 | 26 | 23 | 36 | 23 | 21 | 18 | 22 | 27 | 13 | 20 | 32 | 23 | 23 | 26 | 35 | 31 | 35 | 27 | 22 | 41 | 29 | 21 | 39 | 36 | 19 | 36 | 36 | 24 |   |
| ENSP00000231790_rs63750i | ENSG00000076242  | MLH1         | 19  | 0  | 1  | 1  | 1  | 0  | 0  | 0  | 0  | 2  | 1  | 1  | 0  | 0  | 1  | 1  | 1  | 0  | 0  | 2  | 1  | 2  | 3  | 1  | 0  | 0  | 0  | 0  | 0  | 0  | 0  | 0 |
| ENSP00000231803_ENSP0000 | ENSG00000068078  | IGFBR3       | 13  | 2  | 0  | 1  | 0  | 0  | 1  | 0  | 0  | 0  | 0  | 0  | 0  | 0  | 0  | 0  | 0  | 0  | 0  | 0  | 0  | 0  | 1  | 1  | 0  | 0  | 5  | 1  | 0  | 0  | 1  |   |
| ENSP00000231887          | ENSG00000113790  | EHHAADH      | 89  | 5  | 3  | 4  | 6  | 5  | 8  | 2  | 3  | 2  | 3  | 2  | 4  | 3  | 3  | 1  | 0  | 1  | 4  | 2  | 2  | 5  | 3  | 2  | 3  | 4  | 5  | 1  | 0  | 0  | 0  |   |
| ENSP00000231948          | ENSG00000113851  | CRBN         | 29  | 2  | 1  | 1  | 1  | 1  | 2  | 1  | 0  | 1  | 0  | 1  | 0  | 0  | 2  | 1  | 1  | 1  | 2  | 2  | 1  | 1  | 1  | 0  | 1  | 1  | 1  | 0  | 2  | 0  | 1  |   |
| ENSP00000232125_ENSP0000 | ENSG00000114023  | FAM162A      | 70  | 2  | 0  | 0  | 2  | 3  | 5  | 0  | 0  | 1  | 2  | 0  | 1  | 3  | 0  | 5  | 3  | 2  | 2  | 1  | 1  | 3  | 2  | 1  | 3  | 6  | 6  | 5  | 5  | 2  | 5  |   |
| ENSP00000232165_ENSP0000 | ENSG00000114062  | UBE3A        | 152 | 5  | 5  | 3  | 4  | 6  | 7  | 6  | 5  | 3  | 4  | 2  | 0  | 4  | 4  | 6  | 3  | 6  | 8  | 7  | 8  | 4  | 4  | 3  | 4  | 3  | 4  | 6  | 3  | 13 | 3  | 8 |
| ENSP00000232219          | ENSG00000114115  | RBP1         | 86  | 2  | 0  | 0  | 0  | 0  | 0  | 0  | 0  | 0  | 32 | 3  | 12 | 0  | 0  | 0  | 13 | 11 | 13 | 0  | 0  | 0  | 0  | 0  | 0  | 0  | 0  | 0  | 0  | 0  | 0  | 0 |
| ENSP00000232375_ENSP0000 | ENSG00000114268  | PKFBF4       | 43  | 2  | 2  | 0  | 5  | 5  | 2  | 1  | 0  | 0  | 1  | 0  | 0  | 2  | 0  | 1  | 2  | 0  | 1  | 4  | 1  | 1  | 2  | 1  | 0  | 2  | 3  | 1  | 1  | 2  | 1  | 1 |
| ENSP00000232607_ENSP0000 | ENSG00000114491  | UMPS         | 140 | 6  |    |    |    |    |    |    |    |    |    |    |    |    |    |    |    |    |    |    |    |    |    |    |    |    |    |    |    |    |    |   |

|                                                                         |              |     |    |    |    |    |    |    |    |    |    |    |    |    |    |    |    |    |    |    |    |    |    |    |    |    |    |    |    |    |    |    |   |
|-------------------------------------------------------------------------|--------------|-----|----|----|----|----|----|----|----|----|----|----|----|----|----|----|----|----|----|----|----|----|----|----|----|----|----|----|----|----|----|----|---|
| ENSP00000236273,ENSP00000236273,ENSP00000236273                         | SYF2         | 12  | 0  | 0  | 0  | 1  | 0  | 1  | 0  | 0  | 0  | 0  | 1  | 0  | 1  | 1  | 0  | 0  | 1  | 0  | 0  | 1  | 1  | 0  | 0  | 2  | 1  | 0  | 0  | 1  | 0  | 0  |   |
| ENSP00000236671,ENSP00000236671,ENSP00000236671                         | CTSD         | 222 | 11 | 4  | 6  | 7  | 18 | 18 | 10 | 1  | 8  | 12 | 2  | 6  | 11 | 5  | 14 | 3  | 4  | 2  | 2  | 6  | 4  | 15 | 6  | 9  | 11 | 6  | 8  | 6  | 2  | 5  |   |
| ENSP00000236698,ENSP00000236698,ENSP00000236698                         | STAG1        | 132 | 4  | 1  | 1  | 6  | 5  | 5  | 8  | 6  | 5  | 10 | 2  | 3  | 3  | 1  | 5  | 5  | 3  | 2  | 7  | 5  | 5  | 10 | 1  | 2  | 2  | 4  | 2  | 10 | 4  | 5  |   |
| ENSP00000236850,ENSP00000236850,ENSP00000236850                         |              | 27  | 9  | 8  | 9  | 0  | 0  | 0  | 0  | 0  | 0  | 0  | 0  | 0  | 0  | 0  | 0  | 0  | 0  | 0  | 0  | 0  | 0  | 0  | 0  | 0  | 1  | 0  | 0  | 0  | 0  |    |   |
| ENSP00000236900,ENSP00000236900,ENSP00000236900                         | RPS25P8,RPS2 | 167 | 7  | 6  | 6  | 0  | 8  | 4  | 5  | 6  | 4  | 3  | 5  | 2  | 3  | 10 | 2  | 5  | 7  | 5  | 7  | 13 | 6  | 6  | 8  | 3  | 8  | 8  | 3  | 6  | 8  | 3  |   |
| ENSP00000236925,ENSP00000236925,ENSP00000236925                         | CAMSAP111    | 10  | 0  | 1  | 0  | 0  | 0  | 0  | 0  | 0  | 0  | 1  | 0  | 0  | 0  | 1  | 2  | 0  | 0  | 1  | 0  | 1  | 0  | 0  | 0  | 0  | 0  | 0  | 0  | 1  | 1  | 1  |   |
| ENSP00000236957,ENSP00000236957,ENSP00000236957                         | ATIC         | 480 | 25 | 19 | 19 | 11 | 13 | 17 | 14 | 7  | 16 | 19 | 7  | 15 | 19 | 9  | 16 | 13 | 27 | 15 | 13 | 18 | 13 | 18 | 14 | 10 | 21 | 15 | 20 | 23 | 25 | 21 |   |
| ENSP00000236959,ENSP00000236959,ENSP00000236959                         | EF1B2        | 503 | 27 | 18 | 28 | 11 | 12 | 27 | 13 | 3  | 20 | 17 | 4  | 6  | 12 | 10 | 18 | 17 | 16 | 19 | 13 | 24 | 23 | 9  | 4  | 11 | 23 | 25 | 20 | 32 | 16 | 25 |   |
| ENSP00000236980,ENSP00000236980,ENSP00000236980                         | FASTKD2      | 94  | 4  | 0  | 3  | 3  | 4  | 1  | 4  | 2  | 2  | 2  | 0  | 2  | 4  | 0  | 2  | 3  | 2  | 3  | 1  | 2  | 2  | 6  | 1  | 4  | 8  | 6  | 3  | 6  | 8  | 6  |   |
| ENSP00000236995,ENSP00000236995,ENSP00000236995                         | CREB1        | 34  | 1  | 1  | 1  | 1  | 1  | 1  | 0  | 1  | 1  | 1  | 2  | 1  | 2  | 2  | 1  | 0  | 1  | 0  | 3  | 2  | 1  | 1  | 3  | 1  | 2  | 2  | 0  | 1  | 0  | 0  |   |
| ENSP00000237455,ENSP00000237455,ENSP00000237455                         | RNF103,VPS24 | 17  | 0  | 1  | 0  | 0  | 0  | 0  | 1  | 2  | 0  | 2  | 0  | 0  | 0  | 0  | 1  | 0  | 1  | 1  | 1  | 1  | 0  | 0  | 0  | 0  | 1  | 0  | 3  | 2  | 0  | 0  | 1 |
| ENSP00000237500,ENSP00000237500,ENSP00000237500                         | MYL12B       | 729 | 34 | 24 | 28 | 23 | 43 | 24 | 33 | 21 | 36 | 18 | 7  | 20 | 25 | 16 | 21 | 22 | 30 | 25 | 23 | 26 | 29 | 23 | 13 | 24 | 25 | 33 | 19 | 25 | 21 | 18 |   |
| ENSP00000237530_A284T,ENSP00000237530_A284T,ENSP00000237530_A284T       | RPN2         | 142 | 8  | 0  | 12 | 1  | 0  | 9  | 3  | 0  | 10 | 10 | 0  | 5  | 5  | 0  | 4  | 8  | 0  | 5  | 0  | 0  | 10 | 9  | 0  | 9  | 8  | 4  | 7  | 7  | 0  | 8  |   |
| ENSP00000237530_rs61731,ENSP00000237530_rs61731,ENSP00000237530_rs61731 | RPN2         | 170 | 11 | 0  | 14 | 3  | 2  | 10 | 2  | 2  | 10 | 10 | 0  | 6  | 6  | 0  | 6  | 0  | 3  | 3  | 2  | 10 | 10 | 0  | 9  | 9  | 8  | 9  | 9  | 0  | 10 | 0  |   |
| ENSP00000237538,ENSP00000237538,ENSP00000237538                         | CD58         | 63  | 0  | 0  | 0  | 3  | 1  | 3  | 4  | 2  | 3  | 1  | 2  | 4  | 1  | 1  | 2  | 1  | 2  | 2  | 5  | 2  | 4  | 3  | 3  | 4  | 2  | 0  | 3  | 2  | 2  | 1  |   |
| ENSP00000237642,ENSP00000237642,ENSP00000237642                         | STBD1        | 11  | 0  | 1  | 0  | 1  | 0  | 0  | 1  | 0  | 0  | 0  | 0  | 0  | 0  | 1  | 1  | 0  | 0  | 0  | 1  | 0  | 1  | 2  | 0  | 1  | 0  | 0  | 1  | 0  | 0  | 0  |   |
| ENSP00000237724,ENSP00000237724,ENSP00000237724                         | RAB39GAP2    | 76  | 3  | 1  | 3  | 6  | 3  | 3  | 3  | 1  | 2  | 1  | 0  | 0  | 4  | 2  | 4  | 1  | 0  | 0  | 5  | 4  | 4  | 0  | 0  | 1  | 3  | 2  | 3  | 3  | 5  | 9  |   |
| ENSP00000237858,ENSP00000237858,ENSP00000237858                         | GLRX         | 22  | 0  | 0  | 0  | 0  | 0  | 0  | 0  | 0  | 0  | 2  | 0  | 1  | 0  | 1  | 0  | 0  | 0  | 0  | 0  | 0  | 4  | 0  | 1  | 0  | 0  | 0  | 0  | 10 | 3  | 4  |   |
| ENSP00000237889,ENSP00000237889,ENSP00000237889                         | NUDFB3       | 91  | 1  | 2  | 1  | 3  | 2  | 2  | 2  | 1  | 2  | 4  | 2  | 2  | 3  | 3  | 5  | 5  | 5  | 3  | 3  | 1  | 3  | 5  | 6  | 3  | 4  | 5  | 4  | 5  | 2  | 2  |   |
| ENSP00000238001,ENSP00000238001,ENSP00000238001                         | YWHAQ        | 900 | 42 | 27 | 35 | 29 | 45 | 38 | 27 | 21 | 26 | 37 | 16 | 23 | 22 | 27 | 20 | 24 | 34 | 30 | 40 | 41 | 31 | 17 | 17 | 16 | 39 | 33 | 28 | 48 | 36 | 31 |   |
| ENSP00000238112,ENSP00000238112,ENSP00000238112                         | CP5F3        | 72  | 4  | 4  | 1  | 3  | 2  | 3  | 3  | 0  | 2  | 7  | 1  | 2  | 1  | 1  | 2  | 3  | 1  | 4  | 1  | 2  | 1  | 4  | 1  | 2  | 5  | 1  | 2  | 6  | 2  | 1  |   |
| ENSP00000238146,ENSP00000238146,ENSP00000238146                         | DDX55        | 46  | 2  | 1  | 2  | 4  | 0  | 2  | 2  | 1  | 1  | 1  | 0  | 0  | 2  | 1  | 2  | 5  | 1  | 2  | 1  | 2  | 1  | 2  | 1  | 0  | 1  | 1  | 0  | 3  | 3  | 2  |   |
| ENSP00000238256,ENSP00000238256,ENSP00000238256                         | KBP15        | 97  | 3  | 1  | 0  | 5  | 4  | 4  | 3  | 1  | 1  | 1  | 2  | 3  | 1  | 1  | 3  | 1  | 3  | 1  | 8  | 5  | 1  | 3  | 4  | 2  | 2  | 2  | 4  | 7  | 8  | 11 |   |
| ENSP00000238341,ENSP00000238341,ENSP00000238341                         | CEP110       | 24  | 3  | 1  | 0  | 0  | 2  | 2  | 1  | 1  | 2  | 0  | 2  | 1  | 1  | 0  | 0  | 0  | 0  | 0  | 2  | 1  | 1  | 0  | 0  | 1  | 1  | 0  | 1  | 1  | 0  | 0  |   |
| ENSP00000238379_rs10438,ENSP00000238379_rs10438,ENSP00000238379_rs10438 | HDHD3        | 34  | 0  | 1  | 1  | 0  | 3  | 1  | 1  | 5  | 1  | 0  | 0  | 0  | 1  | 2  | 0  | 1  | 2  | 0  | 1  | 2  | 0  | 1  | 2  | 3  | 0  | 0  | 0  | 2  | 2  | 2  |   |
| ENSP00000238477,ENSP00000238477,ENSP00000238477                         | ALG2         | 33  | 1  | 0  | 0  | 3  | 1  | 3  | 2  | 0  | 1  | 2  | 0  | 1  | 1  | 0  | 0  | 1  | 1  | 2  | 1  | 0  | 1  | 3  | 1  | 1  | 3  | 2  | 2  | 0  | 0  | 0  |   |
| ENSP00000238497,ENSP00000238497,ENSP00000238497                         | VPS4B        | 99  | 2  | 1  | 2  | 2  | 4  | 2  | 5  | 3  | 3  | 0  | 0  | 1  | 5  | 5  | 2  | 3  | 5  | 4  | 4  | 4  | 1  | 3  | 2  | 2  | 7  | 7  | 6  | 4  | 3  | 7  |   |
| ENSP00000238561,ENSP00000238561,ENSP00000238561                         | ADC1K1       | 33  | 1  | 0  | 1  | 2  | 1  | 2  | 3  | 1  | 1  | 2  | 0  | 1  | 0  | 0  | 2  | 0  | 2  | 1  | 1  | 2  | 1  | 2  | 2  | 0  | 1  | 1  | 1  | 1  | 1  | 0  |   |
| ENSP00000238616,ENSP00000238616,ENSP00000238616                         | NEK9         | 27  | 0  | 0  | 1  | 1  | 1  | 0  | 0  | 1  | 0  | 1  | 0  | 1  | 2  | 2  | 1  | 0  | 1  | 1  | 2  | 3  | 1  | 1  | 0  | 0  | 1  | 2  | 0  | 1  | 1  | 2  |   |
| ENSP00000238618,ENSP00000238618,ENSP00000238618                         | ACY1P        | 21  | 0  | 0  | 0  | 1  | 2  | 1  | 1  | 1  | 1  | 1  | 0  | 0  | 0  | 1  | 1  | 0  | 1  | 2  | 1  | 1  | 2  | 1  | 0  | 0  | 1  | 1  | 0  | 0  | 1  | 0  |   |
| ENSP00000238633,ENSP00000238633,ENSP00000238633                         | NP2C         | 79  | 2  | 2  | 1  | 3  | 1  | 2  | 2  | 3  | 1  | 8  | 2  | 4  | 2  | 3  | 3  | 3  | 4  | 3  | 3  | 3  | 3  | 3  | 1  | 1  | 3  | 4  | 3  | 3  | 2  | 1  |   |
| ENSP00000238647,ENSP00000238647,ENSP00000238647                         | AC10F4       | 94  | 4  | 3  | 1  | 5  | 1  | 3  | 3  | 0  | 1  | 3  | 3  | 5  | 3  | 3  | 3  | 6  | 8  | 5  | 6  | 5  | 1  | 5  | 3  | 2  | 6  | 1  | 1  | 0  | 3  | 1  |   |
| ENSP00000238651,ENSP00000238651,ENSP00000238651                         | ACO2C2       | 80  | 7  | 3  | 6  | 2  | 1  | 4  | 3  | 4  | 2  | 4  | 1  | 3  | 3  | 1  | 2  | 3  | 0  | 0  | 2  | 2  | 2  | 5  | 3  | 7  | 2  | 3  | 4  | 0  | 1  | 3  |   |
| ENSP00000238688,ENSP00000238688,ENSP00000238688                         | AC10F156     | 105 | 4  | 4  | 2  | 3  | 4  | 2  | 3  | 3  | 1  | 6  | 5  | 0  | 3  | 5  | 2  | 1  | 4  | 5  | 2  | 8  | 4  | 5  | 5  | 4  | 2  | 4  | 1  | 5  | 6  | 2  |   |
| ENSP00000238714,ENSP00000238714,ENSP00000238714                         | PAPOLG       | 55  | 3  | 2  | 1  | 3  | 3  | 2  | 2  | 1  | 2  | 1  | 2  | 2  | 0  | 0  | 2  | 4  | 2  | 0  | 2  | 2  | 1  | 2  | 1  | 1  | 1  | 2  | 0  | 3  | 3  | 3  |   |
| ENSP00000238738,ENSP00000238738,ENSP00000238738                         | RHOQ         | 19  | 1  | 2  | 0  | 0  | 0  | 0  | 0  | 1  | 1  | 0  | 0  | 0  | 0  | 0  | 1  | 0  | 0  | 2  | 1  | 0  | 1  | 0  | 1  | 1  | 0  | 1  | 2  | 1  | 1  | 1  |   |
| ENSP00000238788,ENSP00000238788,ENSP00000238788                         | TMEM214      | 98  | 8  | 3  | 4  | 5  | 3  | 4  | 4  | 1  | 3  | 2  | 1  | 3  | 3  | 2  | 3  | 2  | 5  | 3  | 5  | 3  | 2  | 5  | 3  | 4  | 5  | 1  | 1  | 3  | 2  | 1  |   |
| ENSP00000238823,ENSP00000238823,ENSP00000238823                         | FAM98A       | 90  | 6  | 3  | 4  | 4  | 1  | 2  | 2  | 0  | 2  | 6  | 1  | 1  | 3  | 3  | 4  | 3  | 2  | 2  | 3  | 3  | 3  | 1  | 1  | 1  | 5  | 5  | 4  | 7  | 4  | 4  |   |
| ENSP00000238855,ENSP00000238855,ENSP00000238855                         | ATFPH        | 11  | 1  | 1  | 0  | 1  | 0  | 1  | 1  | 1  | 2  | 0  | 0  | 0  | 0  | 0  | 0  | 0  | 0  | 0  | 0  | 0  | 0  | 0  | 1  | 0  | 1  | 0  | 0  | 0  | 0  | 0  |   |
| ENSP00000239027,ENSP00000239027,ENSP00000239027                         | HELLS        | 141 | 17 | 7  | 4  | 10 | 4  | 0  | 4  | 0  | 2  | 3  | 1  | 3  | 5  | 7  | 10 | 2  | 1  | 4  | 7  | 12 | 9  | 9  | 3  | 1  | 4  | 2  | 2  | 1  | 4  | 3  |   |
| ENSP00000239138,ENSP00000239138,ENSP00000239138                         | GN13         | 92  | 3  | 1  | 3  | 1  | 3  | 3  | 2  | 1  | 1  | 5  | 2  | 2  | 3  | 1  | 5  | 4  | 3  | 3  | 4  | 7  | 4  | 3  | 2  | 3  | 5  | 3  | 4  | 4  | 4  | 3  |   |
| ENSP00000239215,ENSP00000239215,ENSP00000239215                         | BNIP1        | 78  | 2  | 1  | 1  | 3  | 3  | 1  | 4  | 3  | 1  | 4  | 1  | 2  | 3  | 3  | 2  | 5  | 3  | 7  | 3  | 2  | 4  | 2  | 2  | 3  | 1  | 2  | 5  | 2  | 2  | 1  |   |
| ENSP00000239367,ENSP00000239367,ENSP00000239367                         | LRP11        | 11  | 0  | 0  | 0  | 0  | 1  | 0  | 0  | 1  | 0  | 0  | 0  | 0  | 0  | 0  | 1  | 1  | 0  | 1  | 2  | 0  | 0  | 0  | 0  | 1  | 0  | 0  | 0  | 2  | 0  | 1  |   |
| ENSP00000239690,ENSP00000239690,ENSP00000239690                         | NUCD01       | 121 | 5  | 0  | 3  | 3  | 2  | 3  | 5  | 4  | 3  | 4  | 0  | 2  | 3  | 0  | 4  | 2  | 11 | 4  | 3  | 6  | 2  | 4  | 0  | 3  | 4  | 5  | 3  | 11 | 11 | 11 |   |
| ENSP00000239690_rs29806,ENSP00000239690_rs29806,ENSP00000239690_rs29806 | NUCD01       | 119 | 5  | 0  | 3  | 3  | 2  | 3  | 5  | 4  | 3  | 4  | 0  | 2  | 3  | 0  | 4  | 2  | 11 | 4  | 3  | 6  | 2  | 4  | 0  | 3  | 4  | 5  | 3  | 10 | 11 | 10 |   |
| ENSP00000239878,ENSP00000239878,ENSP00000239878                         | UFM1         | 10  | 0  | 1  | 1  | 1  | 1  | 4  | 0  | 0  | 0  | 0  | 0  | 0  | 0  | 0  | 0  | 0  | 0  | 0  | 0  | 0  | 0  | 0  | 0  | 0  | 0  | 0  | 1  | 0  | 0  | 1  |   |
| ENSP00000239882,ENSP00000239882,ENSP00000239882                         | ELF1         | 31  | 0  | 0  | 1  | 3  | 1  | 3  | 1  | 0  | 1  | 0  | 1  | 0  | 1  | 0  | 1  | 3  | 1  | 0  | 1  | 2  | 1  | 0  | 2  | 0  | 1  | 2  | 1  | 1  | 1  | 2  | 1 |
| ENSP00000239891,ENSP00000239891,ENSP00000239891                         | ALG5         | 126 | 8  | 4  | 5  | 12 | 15 | 8  | 8  | 1  | 6  | 2  | 1  | 3  | 4  | 2  | 4  | 2  | 1  | 3  | 7  | 3  | 3  | 5  | 1  | 6  | 2  | 4  | 3  | 0  | 1  | 2  |   |
| ENSP00000239893,ENSP00000239893,ENSP00000239893                         | EXOSC8       | 61  | 5  | 1  | 1  | 3  | 1  | 0  | 2  | 0  | 2  | 4  | 2  | 1  | 1  | 1  | 2  | 3  | 3  | 4  | 4  | 1  | 1  | 2  | 0  | 1  | 3  | 1  | 3  | 3  | 3  | 3  |   |
| ENSP00000239940,ENSP00000239940,ENSP                                    |              |     |    |    |    |    |    |    |    |    |    |    |    |    |    |    |    |    |    |    |    |    |    |    |    |    |    |    |    |    |    |    |   |

|                         |                  |              |     |    |    |    |    |    |    |    |    |    |    |    |    |    |    |    |    |    |    |    |    |    |    |    |    |    |    |    |    |    |     |   |
|-------------------------|------------------|--------------|-----|----|----|----|----|----|----|----|----|----|----|----|----|----|----|----|----|----|----|----|----|----|----|----|----|----|----|----|----|----|-----|---|
| ENSP00000244061,ENSP000 | ENSG00000124226  | RNF114       | 26  | 6  | 3  | 1  | 1  | 2  | 1  | 1  | 1  | 0  | 1  | 0  | 0  | 0  | 0  | 0  | 1  | 1  | 0  | 3  | 0  | 0  | 0  | 1  | 1  | 1  | 0  | 1  | 0  | 0  |     |   |
| ENSP00000244137,ENSP000 | ENSG00000124299  | PEPD         | 138 | 13 | 7  | 9  | 7  | 7  | 3  | 3  | 1  | 1  | 5  | 0  | 4  | 1  | 3  | 2  | 6  | 6  | 1  | 9  | 6  | 4  | 4  | 1  | 1  | 8  | 10 | 3  | 4  | 2  | 7   |   |
| ENSP00000244204         | ENSG00000124357  | NAGK         | 82  | 7  | 1  | 4  | 5  | 3  | 2  | 2  | 3  | 6  | 1  | 2  | 5  | 4  | 3  | 2  | 0  | 0  | 3  | 2  | 1  | 2  | 0  | 1  | 6  | 3  | 3  | 5  | 1  | 2  |     |   |
| ENSP00000244230,ENSP000 | ENSG00000124383  | MGPHSPH10    | 89  | 2  | 2  | 2  | 0  | 0  | 1  | 1  | 2  | 2  | 9  | 2  | 4  | 2  | 1  | 4  | 6  | 1  | 1  | 2  | 2  | 4  | 2  | 3  | 4  | 3  | 4  | 0  | 10 | 4  | 9   |   |
| ENSP00000244496,ENSP000 | ENSG00000124541  | C6orf153     | 17  | 0  | 0  | 0  | 0  | 1  | 0  | 1  | 0  | 1  | 0  | 1  | 0  | 0  | 2  | 1  | 0  | 1  | 1  | 1  | 0  | 2  | 2  | 0  | 0  | 0  | 0  | 1  | 1  | 0  |     |   |
| ENSP00000244520,ENSP000 | ENSG00000124562  | SNRPC        | 145 | 5  | 4  | 3  | 2  | 6  | 4  | 5  | 1  | 4  | 8  | 1  | 6  | 2  | 2  | 5  | 3  | 6  | 4  | 8  | 6  | 5  | 7  | 6  | 4  | 7  | 7  | 4  | 8  | 6  | 6   |   |
| ENSP00000244571,ENSP000 | ENSG00000124608  | AARS2        | 162 | 2  | 5  | 1  | 3  | 8  | 4  | 8  | 9  | 1  | 7  | 3  | 4  | 8  | 3  | 6  | 0  | 2  | 4  | 10 | 8  | 6  | 5  | 7  | 5  | 9  | 8  | 3  | 9  | 10 | 4   |   |
| ENSP00000244601,ENSP000 | ENSG00000124678  | HIST2H2BE    | 920 | 32 | 19 | 31 | 9  | 29 | 35 | 26 | 14 | 33 | 54 | 43 | 32 | 27 | 18 | 23 | 20 | 14 | 27 | 23 | 46 | 34 | 26 | 34 | 53 | 34 | 36 | 41 | 39 | 29 | 39  |   |
| ENSP00000244625,ENSP000 | ENSG00000124659  | TBC8         | 50  | 4  | 3  | 2  | 3  | 5  | 4  | 2  | 1  | 0  | 0  | 0  | 0  | 1  | 0  | 0  | 1  | 3  | 2  | 3  | 6  | 1  | 1  | 1  | 1  | 2  | 1  | 1  | 1  | 0  |     |   |
| ENSP00000244763,ENSP000 | ENSG00000124783  | SSR1         | 146 | 7  | 4  | 7  | 2  | 4  | 4  | 3  | 5  | 3  | 5  | 3  | 4  | 5  | 4  | 5  | 6  | 3  | 6  | 4  | 4  | 5  | 7  | 5  | 6  | 9  | 5  | 7  | 7  | 3  | 4   |   |
| ENSP00000244776,ENSP000 | ENSG00000124795  | DEK          | 175 | 4  | 5  | 3  | 3  | 7  | 6  | 7  | 4  | 5  | 11 | 8  | 5  | 7  | 7  | 5  | 5  | 5  | 3  | 4  | 6  | 4  | 9  | 10 | 5  | 5  | 7  | 4  | 8  | 9  | 4   |   |
| ENSP00000245046         | ENSG00000125037  | TMEM111      | 70  | 6  | 0  | 4  | 2  | 4  | 6  | 3  | 2  | 2  | 4  | 0  | 1  | 3  | 1  | 5  | 2  | 1  | 0  | 4  | 2  | 2  | 1  | 0  | 2  | 4  | 0  | 2  | 4  | 1  | 2   |   |
| ENSP00000245157,ENSP000 | ENSG00000125124  | BBS2         | 17  | 0  | 1  | 0  | 1  | 1  | 0  | 2  | 0  | 0  | 0  | 0  | 0  | 0  | 1  | 0  | 0  | 1  | 0  | 2  | 1  | 1  | 1  | 0  | 0  | 2  | 0  | 1  | 1  | 0  |     |   |
| ENSP00000245185,ENSP000 | ENSG00000123761  |              | 28  | 0  | 0  | 0  | 0  | 1  | 1  | 0  | 0  | 0  | 0  | 0  | 0  | 0  | 1  | 0  | 0  | 1  | 3  | 0  | 1  | 0  | 0  | 0  | 0  | 0  | 0  | 2  | 1  | 1  | 0   |   |
| ENSP00000245206,ENSP000 | ENSG00000125166  | GOT2         | 386 | 14 | 10 | 14 | 6  | 17 | 15 | 17 | 10 | 9  | 19 | 8  | 13 | 12 | 7  | 11 | 9  | 11 | 7  | 12 | 9  | 12 | 20 | 11 | 14 | 14 | 17 | 14 | 17 | 19 | 18  |   |
| ENSP00000245323         | ENSG00000125266  | EFNB2        | 13  | 2  | 2  | 1  | 1  | 0  | 0  | 0  | 0  | 0  | 0  | 1  | 0  | 0  | 0  | 0  | 1  | 0  | 0  | 0  | 0  | 0  | 4  | 1  | 0  | 0  | 0  | 0  | 0  | 0  | 0   |   |
| ENSP00000245418,ENSP000 | ENSG00000125351  | UPF38        | 79  | 3  | 4  | 2  | 2  | 2  | 1  | 4  | 7  | 1  | 1  | 2  | 2  | 2  | 4  | 3  | 2  | 1  | 3  | 2  | 3  | 4  | 4  | 2  | 2  | 0  | 1  | 5  | 2  | 2  | 6   | 2 |
| ENSP00000245458         | ENSG00000123741  | RPS29P9,RP52 | 117 | 2  | 14 | 1  | 1  | 6  | 2  | 3  | 6  | 1  | 1  | 6  | 1  | 1  | 18 | 1  | 2  | 10 | 1  | 2  | 7  | 1  | 1  | 8  | 1  | 2  | 8  | 0  | 1  | 7  | 2   |   |
| ENSP00000245539,ENSP000 | ENSG00000125445  | MRPS7        | 124 | 8  | 5  | 4  | 4  | 4  | 5  | 4  | 5  | 2  | 4  | 5  | 3  | 2  | 6  | 5  | 2  | 2  | 5  | 3  | 2  | 5  | 6  | 4  | 4  | 6  | 4  | 3  | 2  | 6  | 4   |   |
| ENSP00000245544         | ENSG00000125450  | NURP5        | 177 | 11 | 8  | 5  | 6  | 4  | 4  | 5  | 4  | 6  | 6  | 4  | 6  | 3  | 2  | 6  | 3  | 5  | 5  | 7  | 9  | 6  | 11 | 7  | 6  | 10 | 6  | 1  | 8  | 7  | 6   |   |
| ENSP00000245551         | ENSG00000125457  | MIF4G        | 17  | 0  | 0  | 0  | 3  | 2  | 0  | 0  | 0  | 0  | 0  | 0  | 0  | 1  | 1  | 0  | 0  | 1  | 0  | 4  | 1  | 1  | 1  | 0  | 1  | 1  | 0  | 0  | 0  | 0  | 0   |   |
| ENSP00000245552         | ENSG00000125458  | NTSC         | 48  | 1  | 1  | 1  | 1  | 2  | 1  | 0  | 1  | 2  | 1  | 0  | 0  | 0  | 0  | 0  | 1  | 5  | 2  | 2  | 4  | 2  | 4  | 0  | 1  | 1  | 4  | 2  | 3  | 2  | 2   | 2 |
| ENSP00000245564,ENSP000 | ENSG00000125459  | MSTO1        | 23  | 1  | 1  | 0  | 1  | 2  | 1  | 0  | 1  | 0  | 0  | 0  | 1  | 1  | 1  | 1  | 2  | 1  | 0  | 1  | 1  | 0  | 1  | 0  | 0  | 2  | 1  | 0  | 1  | 0  | 2   |   |
| ENSP00000245588,ENSP000 | ENSG00000125482  | TTF1         | 21  | 1  | 1  | 0  | 0  | 0  | 1  | 1  | 1  | 1  | 1  | 0  | 0  | 0  | 1  | 1  | 0  | 1  | 0  | 0  | 1  | 1  | 0  | 0  | 2  | 0  | 0  | 0  | 1  | 3  | 2   |   |
| ENSP00000245816         | ENSG00000125656  | CLPP         | 232 | 6  | 5  | 6  | 7  | 7  | 6  | 8  | 2  | 5  | 9  | 7  | 6  | 9  | 7  | 9  | 5  | 11 | 8  | 9  | 9  | 7  | 14 | 11 | 15 | 7  | 3  | 6  | 14 | 7  | 7   |   |
| ENSP00000245838,ENSP000 | ENSG00000125676  | THOC2        | 137 | 5  | 0  | 7  | 4  | 1  | 4  | 6  | 1  | 6  | 8  | 3  | 8  | 4  | 2  | 6  | 6  | 3  | 4  | 5  | 6  | 6  | 7  | 5  | 6  | 5  | 4  | 4  | 4  | 2  | 5   |   |
| ENSP00000245925         | ENSG00000125746  | EML2         | 91  | 1  | 1  | 0  | 7  | 9  | 6  | 7  | 6  | 5  | 0  | 0  | 1  | 1  | 0  | 0  | 7  | 7  | 6  | 1  | 1  | 0  | 3  | 2  | 3  | 7  | 4  | 5  | 0  | 0  | 1   |   |
| ENSP00000245932,ENSP000 | ENSG00000125753  | VASP         | 127 | 11 | 2  | 5  | 2  | 0  | 5  | 7  | 5  | 7  | 6  | 1  | 3  | 1  | 0  | 3  | 4  | 3  | 3  | 2  | 2  | 3  | 6  | 2  | 4  | 13 | 3  | 4  | 7  | 8  | 5   |   |
| ENSP00000245934,ENSP000 | ENSG00000125755  | SYMPK        | 195 | 8  | 3  | 4  | 6  | 4  | 7  | 5  | 5  | 5  | 11 | 0  | 10 | 9  | 0  | 8  | 5  | 10 | 6  | 11 | 7  | 7  | 9  | 6  | 6  | 10 | 8  | 4  | 9  | 5  | 7   |   |
| ENSP00000246024,ENSP000 | ENSG00000125827  | TMX4         | 36  | 1  | 2  | 1  | 1  | 2  | 1  | 0  | 1  | 2  | 3  | 0  | 2  | 1  | 0  | 1  | 1  | 0  | 2  | 1  | 3  | 1  | 1  | 1  | 0  | 2  | 3  | 2  | 1  | 0  | 0   |   |
| ENSP00000246024_rs20760 | ENSG00000125827  | TMX4         | 26  | 1  | 0  | 1  | 1  | 2  | 1  | 0  | 0  | 2  | 2  | 0  | 1  | 1  | 0  | 1  | 1  | 0  | 1  | 1  | 1  | 1  | 1  | 0  | 0  | 1  | 2  | 2  | 1  | 1  | 0   |   |
| ENSP00000246043_rs11960 | ENSG00000125844  | RBRP1        | 888 | 82 | 62 | 57 | 20 | 28 | 30 | 32 | 35 | 25 | 23 | 23 | 14 | 16 | 31 | 30 | 19 | 40 | 27 | 38 | 47 | 25 | 32 | 35 | 16 | 40 | 23 | 14 | 5  | 10 | 9   |   |
| ENSP00000246069         | ENSG00000125868  | DSN1         | 111 | 7  | 3  | 7  | 4  | 11 | 11 | 5  | 3  | 4  | 3  | 2  | 1  | 1  | 2  | 1  | 3  | 3  | 5  | 2  | 2  | 2  | 5  | 2  | 2  | 4  | 3  | 4  | 4  | 3  | 2   |   |
| ENSP00000246071,ENSP000 | ENSG00000125870  | SNRBP8       | 107 | 3  | 1  | 3  | 5  | 7  | 3  | 6  | 4  | 3  | 4  | 1  | 5  | 2  | 3  | 1  | 1  | 6  | 3  | 5  | 6  | 3  | 4  | 3  | 3  | 2  | 6  | 4  | 5  | 2  | 3   |   |
| ENSP00000246077,ENSP000 | ENSG00000125875  | TBCID20      | 20  | 2  | 0  | 0  | 1  | 1  | 0  | 1  | 0  | 0  | 0  | 0  | 0  | 0  | 0  | 1  | 2  | 2  | 1  | 2  | 0  | 1  | 0  | 0  | 1  | 0  | 2  | 2  | 0  | 1  | 0   |   |
| ENSP00000246117,ENSP000 | ENSG00000125912  | NCLN         | 126 | 7  | 1  | 2  | 1  | 2  | 5  | 3  | 2  | 6  | 5  | 0  | 2  | 3  | 0  | 5  | 6  | 10 | 8  | 4  | 4  | 4  | 10 | 2  | 3  | 8  | 5  | 5  | 6  | 4  | 3   |   |
| ENSP00000246149,ENSP000 | ENSG00000004487  | AOF2         | 93  | 7  | 4  | 4  | 2  | 2  | 0  | 1  | 3  | 3  | 4  | 2  | 3  | 4  | 1  | 2  | 2  | 3  | 2  | 6  | 8  | 5  | 3  | 2  | 1  | 6  | 1  | 4  | 1  | 4  | 3   |   |
| ENSP00000246151         | ENSG00000057757  | C1orf128     | 45  | 2  | 2  | 1  | 3  | 3  | 3  | 2  | 2  | 1  | 1  | 0  | 0  | 1  | 1  | 1  | 1  | 3  | 1  | 0  | 3  | 1  | 0  | 1  | 0  | 3  | 2  | 2  | 2  | 1  | 1   |   |
| ENSP00000246194         | ENSG00000125970  | RALY         | 168 | 11 | 8  | 9  | 5  | 8  | 4  | 5  | 6  | 7  | 8  | 5  | 9  | 3  | 1  | 8  | 2  | 5  | 4  | 6  | 5  | 5  | 5  | 4  | 4  | 7  | 6  | 3  | 3  | 8  | 4   |   |
| ENSP00000246337,ENSP000 | ENSG00000126088  | UROD         | 35  | 0  | 0  | 0  | 1  | 2  | 1  | 1  | 0  | 0  | 1  | 0  | 0  | 0  | 1  | 0  | 2  | 2  | 0  | 2  | 1  | 2  | 1  | 0  | 0  | 0  | 1  | 1  | 7  | 5  | 4   |   |
| ENSP00000246489,ENSP000 | ENSG00000126214  | KLC1         | 264 | 18 | 10 | 11 | 8  | 4  | 7  | 5  | 4  | 2  | 3  | 4  | 5  | 4  | 9  | 10 | 6  | 13 | 10 | 11 | 16 | 9  | 6  | 11 | 10 | 10 | 8  | 19 | 12 | 10 | 10  |   |
| ENSP00000246505,ENSP000 | ENSG00000126226  | PCID2        | 41  | 1  | 0  | 1  | 5  | 2  | 1  | 4  | 2  | 1  | 1  | 0  | 1  | 0  | 0  | 1  | 0  | 1  | 1  | 3  | 1  | 1  | 2  | 1  | 0  | 2  | 1  | 0  | 2  | 3  | 3   |   |
| ENSP00000246533         | ENSG00000126247  | CAPNS1       | 382 | 13 | 7  | 13 | 21 | 18 | 12 | 16 | 10 | 14 | 13 | 3  | 8  | 17 | 10 | 11 | 12 | 13 | 14 | 19 | 14 | 14 | 13 | 6  | 10 | 14 | 12 | 14 | 21 | 10 | 10  |   |
| ENSP00000246548         | ENSG00000126261  | UBA2         | 239 | 17 | 8  | 6  | 5  | 6  | 9  | 13 | 7  | 15 | 24 | 3  | 6  | 5  | 2  | 5  | 8  | 6  | 7  | 8  | 12 | 7  | 3  | 5  | 8  | 3  | 6  | 14 | 6  | 7  |     |   |
| ENSP00000246554,ENSP000 | ENSG00000126267  | CXGB1        | 92  | 4  | 2  | 5  | 1  | 2  | 1  | 2  | 1  | 3  | 2  | 3  | 1  | 3  | 1  | 3  | 4  | 2  | 4  | 2  | 2  | 6  | 3  | 8  | 7  | 5  | 3  | 4  | 2  | 3  |     |   |
| ENSP00000246635_T322M,r | ENSG00000171401  | KRT13        | 34  | 0  | 0  | 0  | 0  | 0  | 0  | 1  | 1  | 0  | 12 | 6  | 7  | 0  | 0  | 0  | 0  | 0  | 0  | 0  | 0  | 0  | 0  | 5  | 1  | 1  | 0  | 0  | 0  | 0  | 0   |   |
| ENSP00000246639,ENSP000 | ENSG00000197079  | KRT35        | 501 | 13 | 3  | 6  | 18 | 49 | 7  | 75 | 7  | 11 | 7  | 18 | 16 | 11 | 85 | 5  | 3  | 23 | 9  | 14 | 18 | 6  | 17 | 49 | 11 | 1  | 11 | 6  | 0  | 1  | 1   |   |
| ENSP00000246646         | ENSG00000171360  | KRT38        | 10  | 1  | 0  | 0  | 0  | 1  | 1  | 0  | 0  | 0  | 1  | 0  | 3  | 0  | 1  | 0  | 0  | 0  | 0  | 0  | 0  | 0  | 0  | 1  | 1  | 0  | 0  | 0  | 0  | 0  | 0   |   |
| ENSP00000246662         | ENSG00000171403  | KRT9         | 134 | 4  | 2  | 15 | 4  | 0  | 18 | 5  | 0  | 7  | 0  | 0  | 14 | 4  | 0  | 10 | 0  | 2  | 1  | 6  | 3  | 6  | 2  | 1  | 19 | 1  | 1  | 9  | 0  | 0  | 0   |   |
| ENSP00000246747         | ENSG000000213465 | ARL2         | 40  | 2  | 2  | 1  | 2  | 2  | 1  | 1  | 2  | 1  | 1  | 1  | 0  | 2  | 0  | 1  | 2  | 0  | 2  | 1  | 0  | 2  | 0  | 1  | 1  | 3  | 1  | 1  | 3  | 3  | 1   |   |
| ENSP00000246747_V141A   | ENSG000000213465 | ARL2         | 41  | 2  | 1  | 1  | 1  | 1  | 1  | 2  | 3  | 1  | 2  | 2  | 0  | 1  | 0  | 0  | 1  | 0  | 1  | 1  | 1  | 0  | 1  | 2  | 2  | 3  | 3  | 2  | 2  | 2  | 1</ |   |

|                                         |              |     |    |    |    |    |    |    |    |    |    |    |    |    |    |    |    |    |    |    |    |    |    |    |    |    |    |    |    |    |    |    |   |
|-----------------------------------------|--------------|-----|----|----|----|----|----|----|----|----|----|----|----|----|----|----|----|----|----|----|----|----|----|----|----|----|----|----|----|----|----|----|---|
| ENSP00000249364_r522902,ENSG00000128595 | ALU1         | 590 | 26 | 30 | 23 | 10 | 16 | 10 | 21 | 11 | 19 | 19 | 11 | 14 | 22 | 24 | 26 | 14 | 28 | 18 | 23 | 33 | 24 | 26 | 20 | 18 | 14 | 15 | 6  | 28 | 23 | 18 |   |
| ENSP00000249396,ENSP00000128595         | SIRT2        | 13  | 0  | 0  | 0  | 0  | 1  | 1  | 2  | 1  | 1  | 0  | 0  | 0  | 1  | 0  | 0  | 0  | 0  | 1  | 2  | 0  | 0  | 0  | 0  | 0  | 0  | 0  | 1  | 0  | 1  | 0  | 1 |
| ENSP00000249442,ENSP00000128654         | MTX2         | 19  | 1  | 0  | 1  | 0  | 0  | 1  | 0  | 0  | 1  | 4  | 0  | 1  | 0  | 0  | 0  | 0  | 0  | 1  | 0  | 0  | 1  | 1  | 0  | 1  | 1  | 0  | 1  | 3  | 0  | 1  |   |
| ENSP00000249480,ENSG00000128692         |              | 414 | 8  | 21 | 14 | 11 | 20 | 8  | 10 | 13 | 8  | 20 | 13 | 6  | 10 | 15 | 9  | 9  | 23 | 14 | 9  | 22 | 13 | 12 | 15 | 12 | 17 | 16 | 10 | 18 | 20 | 18 |   |
| ENSP00000249636,ENSG00000033800         | PIAS1        | 16  | 0  | 0  | 0  | 0  | 0  | 0  | 2  | 1  | 2  | 0  | 0  | 0  | 1  | 0  | 2  | 1  | 0  | 0  | 1  | 0  | 0  | 1  | 0  | 1  | 0  | 0  | 0  | 2  | 0  | 2  |   |
| ENSP00000249647,ENSG00000092531         | SNAP23       | 235 | 13 | 9  | 13 | 8  | 6  | 6  | 7  | 3  | 10 | 6  | 4  | 6  | 8  | 3  | 5  | 5  | 9  | 5  | 7  | 6  | 5  | 11 | 8  | 8  | 11 | 11 | 6  | 11 | 13 | 12 |   |
| ENSP00000249760,ENSG00000128928         | CIV5         | 100 | 4  | 2  | 3  | 4  | 5  | 4  | 3  | 7  | 3  | 6  | 1  | 1  | 3  | 1  | 2  | 3  | 3  | 1  | 2  | 2  | 1  | 4  | 3  | 4  | 6  | 8  | 4  | 4  | 3  | 3  |   |
| ENSP00000249776,ENSG00000128944         | C15orf23     | 15  | 2  | 2  | 0  | 1  | 0  | 0  | 1  | 0  | 2  | 0  | 1  | 0  | 2  | 1  | 0  | 0  | 0  | 0  | 1  | 0  | 0  | 0  | 0  | 0  | 0  | 0  | 0  | 0  | 1  | 1  |   |
| ENSP00000249783,ENSP00000128951         | DUT1         | 123 | 9  | 0  | 2  | 4  | 7  | 4  | 5  | 0  | 7  | 9  | 1  | 3  | 4  | 3  | 5  | 5  | 1  | 4  | 5  | 4  | 9  | 5  | 0  | 4  | 5  | 3  | 2  | 5  | 3  | 5  |   |
| ENSP00000249837,ENSP00000129003         | VSPT13C      | 197 | 9  | 1  | 5  | 9  | 7  | 3  | 8  | 4  | 2  | 6  | 1  | 3  | 8  | 2  | 8  | 7  | 9  | 3  | 14 | 12 | 9  | 11 | 2  | 4  | 13 | 9  | 9  | 10 | 3  | 6  |   |
| ENSP00000249883,ENSP00000114019         | AMOTL2       | 19  | 0  | 0  | 1  | 1  | 0  | 1  | 2  | 0  | 1  | 1  | 1  | 1  | 1  | 0  | 0  | 0  | 0  | 1  | 1  | 2  | 1  | 0  | 0  | 0  | 0  | 0  | 1  | 2  | 0  | 1  |   |
| ENSP00000249923,ENSP00000129083         | COPB1        | 619 | 34 | 16 | 19 | 25 | 29 | 29 | 32 | 15 | 26 | 17 | 5  | 11 | 17 | 4  | 16 | 17 | 27 | 19 | 19 | 14 | 24 | 22 | 14 | 18 | 38 | 29 | 26 | 24 | 14 | 19 |   |
| ENSP00000249924,ENSP00000129084         | PSMA1        | 274 | 7  | 10 | 7  | 7  | 11 | 8  | 9  | 9  | 11 | 6  | 7  | 4  | 5  | 13 | 6  | 7  | 9  | 7  | 8  | 15 | 10 | 11 | 9  | 5  | 15 | 17 | 10 | 6  | 15 | 10 |   |
| ENSP00000250066_P8915,ENSG00000129204   | USP6         | 12  | 0  | 1  | 0  | 0  | 0  | 0  | 0  | 0  | 1  | 0  | 2  | 0  | 0  | 0  | 0  | 1  | 0  | 0  | 1  | 0  | 0  | 0  | 1  | 0  | 0  | 0  | 1  | 1  | 1  | 1  |   |
| ENSP00000250101,ENSG00000129235         | TXNDC17      | 129 | 3  | 1  | 1  | 4  | 8  | 6  | 3  | 2  | 0  | 4  | 2  | 2  | 2  | 5  | 7  | 3  | 5  | 7  | 4  | 5  | 5  | 8  | 2  | 3  | 12 | 4  | 5  | 8  | 4  | 4  |   |
| ENSP00000250113,ENSP00000129245         | FXR2         | 167 | 6  | 3  | 1  | 4  | 2  | 3  | 6  | 4  | 3  | 7  | 6  | 2  | 1  | 6  | 5  | 5  | 11 | 9  | 7  | 8  | 5  | 6  | 4  | 5  | 4  | 5  | 4  | 12 | 13 | 10 |   |
| ENSP00000250156,ENSP00000129282         | MRM1         | 44  | 1  | 2  | 0  | 3  | 4  | 3  | 4  | 2  | 1  | 0  | 0  | 0  | 1  | 2  | 2  | 2  | 1  | 2  | 3  | 2  | 1  | 1  | 2  | 0  | 2  | 1  | 0  | 0  | 0  | 0  |   |
| ENSP00000250237,ENSG00000133339         | QTTR1        | 79  | 1  | 0  | 2  | 4  | 1  | 1  | 1  | 4  | 1  | 0  | 3  | 1  | 1  | 2  | 2  | 2  | 3  | 2  | 4  | 5  | 3  | 4  | 1  | 3  | 8  | 4  | 3  | 3  | 4  | 5  |   |
| ENSP00000250244,ENSG00000129354         | AP1M2        | 31  | 5  | 1  | 2  | 2  | 0  | 1  | 2  | 0  | 0  | 1  | 0  | 0  | 0  | 0  | 2  | 1  | 0  | 2  | 0  | 1  | 1  | 3  | 1  | 0  | 3  | 0  | 0  | 1  | 1  | 1  |   |
| ENSP00000250263,ENSP00000104626         | ER11         | 54  | 2  | 2  | 0  | 3  | 1  | 0  | 0  | 0  | 0  | 1  | 0  | 0  | 2  | 2  | 3  | 1  | 2  | 3  | 6  | 4  | 3  | 1  | 1  | 0  | 1  | 1  | 2  | 3  | 5  | 5  |   |
| ENSP00000250340,ENSG00000105472         | CLEC11A      | 17  | 0  | 0  | 0  | 7  | 6  | 3  | 0  | 0  | 0  | 0  | 0  | 1  | 0  | 0  | 0  | 0  | 0  | 0  | 0  | 0  | 0  | 0  | 0  | 0  | 0  | 0  | 0  | 0  | 0  | 0  |   |
| ENSP00000250377,ENSP00000100890         | KGAO391      | 10  | 0  | 0  | 0  | 0  | 0  | 0  | 0  | 0  | 0  | 0  | 0  | 0  | 0  | 0  | 1  | 1  | 0  | 1  | 1  | 0  | 1  | 0  | 0  | 0  | 1  | 1  | 1  | 0  | 0  | 2  |   |
| ENSP00000250392,ENSP00000129460         | NIDN         | 37  | 1  | 2  | 1  | 0  | 1  | 0  | 2  | 1  | 1  | 1  | 1  | 1  | 2  | 2  | 1  | 1  | 2  | 1  | 1  | 1  | 1  | 1  | 2  | 1  | 1  | 1  | 1  | 3  | 1  | 2  |   |
| ENSP00000250416,ENSP00000129484         | PARP2        | 11  | 1  | 0  | 1  | 1  | 1  | 0  | 2  | 0  | 0  | 0  | 0  | 0  | 0  | 0  | 0  | 0  | 0  | 1  | 2  | 0  | 0  | 0  | 0  | 0  | 0  | 0  | 0  | 0  | 0  | 1  |   |
| ENSP00000250454,ENSP00000129518         | EAPP         | 19  | 1  | 0  | 2  | 0  | 1  | 0  | 1  | 0  | 1  | 1  | 0  | 1  | 0  | 0  | 1  | 1  | 1  | 1  | 0  | 2  | 2  | 0  | 1  | 1  | 0  | 0  | 0  | 0  | 0  | 0  |   |
| ENSP00000250495,ENSP00000129559         | NEDD8        | 65  | 4  | 4  | 2  | 2  | 4  | 2  | 2  | 1  | 2  | 2  | 2  | 1  | 2  | 5  | 2  | 3  | 1  | 2  | 2  | 3  | 2  | 0  | 0  | 1  | 3  | 2  | 2  | 3  | 3  | 1  |   |
| ENSP00000250498,ENSG00000129562         | DAD1         | 95  | 8  | 3  | 1  | 1  | 5  | 4  | 4  | 3  | 2  | 4  | 0  | 3  | 3  | 1  | 2  | 2  | 4  | 2  | 3  | 4  | 4  | 5  | 2  | 2  | 7  | 4  | 3  | 5  | 2  | 2  |   |
| ENSP00000250559,ENSP00000126726         |              | 262 | 15 | 8  | 7  | 6  | 8  | 8  | 7  | 1  | 9  | 11 | 1  | 6  | 8  | 3  | 6  | 8  | 8  | 6  | 10 | 4  | 10 | 17 | 7  | 14 | 15 | 16 | 3  | 20 | 9  | 11 |   |
| ENSP00000250617,ENSP00000129675         | ARHGEF6      | 21  | 1  | 0  | 0  | 1  | 2  | 2  | 1  | 0  | 0  | 0  | 0  | 0  | 1  | 0  | 1  | 1  | 2  | 0  | 1  | 0  | 1  | 0  | 0  | 0  | 0  | 1  | 0  | 2  | 2  | 1  |   |
| ENSP00000250635,ENSP00000129691         | ASH2L        | 26  | 1  | 0  | 2  | 0  | 0  | 0  | 1  | 0  | 1  | 1  | 0  | 0  | 0  | 0  | 1  | 1  | 2  | 3  | 2  | 3  | 1  | 1  | 0  | 2  | 1  | 0  | 1  | 1  | 0  | 0  |   |
| ENSP00000250784,ENSG00000129824         | RPS4Y1       | 114 | 4  | 2  | 3  | 3  | 3  | 4  | 5  | 4  | 3  | 2  | 1  | 3  | 3  | 2  | 4  | 5  | 3  | 6  | 5  | 4  | 4  | 6  | 2  | 5  | 4  | 3  | 6  | 6  | 5  | 4  |   |
| ENSP00000250937,ENSP00000129932         | DOHH         | 87  | 4  | 4  | 2  | 3  | 6  | 3  | 1  | 1  | 3  | 0  | 1  | 0  | 1  | 3  | 2  | 4  | 6  | 2  | 4  | 3  | 1  | 2  | 0  | 0  | 5  | 8  | 3  | 6  | 7  | 2  |   |
| ENSP00000251038,ENSP00000100722         | ZC3H14       | 87  | 1  | 2  | 2  | 2  | 4  | 2  | 2  | 1  | 3  | 3  | 4  | 0  | 4  | 1  | 3  | 2  | 4  | 3  | 5  | 7  | 2  | 5  | 7  | 4  | 3  | 1  | 1  | 3  | 4  | 2  |   |
| ENSP00000251047,ENSP00000107465         | LMAN1        | 192 | 8  | 4  | 3  | 9  | 11 | 10 | 12 | 3  | 7  | 5  | 1  | 5  | 11 | 3  | 10 | 12 | 11 | 7  | 15 | 11 | 11 | 0  | 0  | 0  | 8  | 8  | 7  | 0  | 0  | 0  |   |
| ENSP00000251074,ENSG00000075188         | NUP37        | 72  | 6  | 2  | 1  | 1  | 1  | 1  | 3  | 1  | 3  | 5  | 0  | 2  | 2  | 3  | 0  | 2  | 4  | 3  | 2  | 3  | 2  | 2  | 3  | 2  | 2  | 3  | 0  | 2  | 6  | 5  |   |
| ENSP00000251081,ENSP00000134755         | DSC2         | 53  | 3  | 1  | 1  | 3  | 2  | 1  | 2  | 2  | 3  | 2  | 1  | 1  | 1  | 2  | 0  | 1  | 1  | 1  | 5  | 2  | 2  | 5  | 4  | 2  | 2  | 1  | 2  | 0  | 0  | 0  |   |
| ENSP00000251143,ENSG00000103544         | C16orf62     | 31  | 1  | 0  | 0  | 0  | 0  | 1  | 0  | 1  | 0  | 0  | 0  | 0  | 3  | 0  | 2  | 1  | 1  | 2  | 3  | 2  | 3  | 0  | 0  | 0  | 5  | 2  | 4  | 0  | 0  | 0  |   |
| ENSP00000251152,ENSP00000111707         | SUDS3        | 16  | 1  | 2  | 1  | 1  | 1  | 1  | 1  | 0  | 0  | 0  | 1  | 0  | 0  | 0  | 1  | 0  | 0  | 1  | 0  | 0  | 0  | 0  | 1  | 1  | 0  | 1  | 0  | 1  | 0  | 1  |   |
| ENSP00000251160,ENSP00000117543         | DPH5         | 18  | 0  | 1  | 2  | 0  | 0  | 0  | 0  | 0  | 1  | 0  | 0  | 0  | 1  | 0  | 1  | 2  | 0  | 1  | 0  | 0  | 1  | 0  | 0  | 0  | 1  | 1  | 1  | 3  | 0  | 2  |   |
| ENSP00000251166,ENSP00000103426         | CORO7        | 60  | 1  | 1  | 0  | 7  | 6  | 4  | 0  | 1  | 0  | 1  | 0  | 0  | 2  | 0  | 3  | 1  | 1  | 0  | 1  | 2  | 3  | 1  | 0  | 0  | 7  | 7  | 4  | 3  | 2  | 2  |   |
| ENSP00000251181,ENSP000001099814        | KIAA0284     | 14  | 1  | 0  | 1  | 0  | 0  | 1  | 1  | 1  | 0  | 0  | 0  | 2  | 0  | 0  | 2  | 0  | 1  | 0  | 0  | 0  | 0  | 0  | 0  | 0  | 0  | 0  | 2  | 0  | 2  | 0  |   |
| ENSP00000251195,ENSP000001092853        | CLSPN        | 11  | 0  | 0  | 0  | 0  | 1  | 0  | 1  | 2  | 0  | 1  | 0  | 0  | 0  | 0  | 1  | 0  | 0  | 0  | 2  | 1  | 0  | 0  | 0  | 0  | 0  | 0  | 0  | 1  | 0  | 1  |   |
| ENSP00000251241,ENSP00000108406         | DHX40        | 15  | 0  | 0  | 1  | 0  | 0  | 0  | 1  | 1  | 2  | 0  | 0  | 0  | 0  | 0  | 0  | 1  | 1  | 3  | 0  | 0  | 1  | 0  | 0  | 0  | 0  | 1  | 0  | 1  | 2  | 0  |   |
| ENSP00000251289,ENSP000001065268        | WDR18        | 108 | 5  | 3  | 2  | 2  | 8  | 1  | 4  | 3  | 2  | 4  | 3  | 4  | 6  | 6  | 3  | 4  | 3  | 4  | 1  | 4  | 2  | 4  | 5  | 1  | 6  | 4  | 2  | 6  | 3  | 3  |   |
| ENSP00000251334,ENSP00000108506         | INTS2        | 15  | 0  | 0  | 0  | 0  | 1  | 0  | 0  | 0  | 2  | 1  | 1  | 0  | 0  | 0  | 0  | 1  | 1  | 1  | 1  | 1  | 1  | 0  | 1  | 2  | 0  | 0  | 0  | 1  | 0  | 0  |   |
| ENSP00000251366,ENSG00000103067         | ERSP2        | 55  | 2  | 3  | 2  | 0  | 0  | 1  | 1  | 3  | 3  | 2  | 0  | 1  | 4  | 4  | 0  | 1  | 2  | 4  | 3  | 3  | 2  | 2  | 2  | 1  | 1  | 2  | 1  | 0  | 1  | 0  |   |
| ENSP00000251413,ENSG00000131462         | TUBG1        | 167 | 6  | 5  | 7  | 9  | 6  | 4  | 7  | 5  | 4  | 3  | 1  | 3  | 7  | 4  | 4  | 8  | 6  | 6  | 7  | 10 | 5  | 3  | 5  | 3  | 9  | 8  | 3  | 7  | 6  | 6  |   |
| ENSP00000251453,ENSG00000105193         | RPS16P1,RP51 | 381 | 10 | 13 | 7  | 8  | 18 | 14 | 13 | 16 | 8  | 10 | 6  | 10 | 15 | 14 | 12 | 14 | 9  | 15 | 18 | 19 | 11 | 8  | 10 | 11 | 11 | 11 | 28 | 12 | 12 | 18 |   |
| ENSP00000251496,ENSP00000109805         | NCAPG        | 109 | 8  | 2  | 5  | 3  | 2  | 1  | 2  | 0  | 3  | 6  | 2  | 4  | 7  | 5  | 6  | 5  | 0  | 3  | 3  | 6  | 3  | 1  | 1  | 3  | 7  | 3  | 1  | 5  | 4  | 8  |   |
| ENSP00000251507,ENSP00000152061         | RABGAP1L     | 14  | 0  | 0  | 0  | 2  | 0  | 0  | 1  | 0  | 1  | 0  | 0  | 0  | 0  | 0  | 2  | 0  | 1  | 2  | 0  | 0  | 1  | 0  | 0  | 3  | 0  | 0  | 0  | 1  | 0  | 0  | 0 |
| ENSP00000251527,ENSP00000117868         | FAM62B       | 102 | 4  | 1  | 2  | 4  | 1  | 4  | 3  | 3  | 7  | 7  | 3  | 5  | 2  | 2  | 4  | 5  | 5  | 8  | 2  | 0  | 1  | 7  | 4  | 6  | 3  | 3  | 2  | 4  | 0  | 0  |   |
| ENSP00000251607,ENSP000001007256        | TRNT1        | 96  | 3  | 2  | 4  | 4  | 3  | 4  | 3  | 0  | 3  | 2  | 1  | 1  | 3  | 2  | 2  | 3  | 3  | 1  | 3  | 3  | 4  | 2  | 3  | 3  | 6  | 6  | 4  | 6  | 6  | 6  |   |
| ENSP00000251636,ENSP000001067248        | DHX29        | 62  | 7  | 3  | 4  | 2  | 1  | 0  | 2  | 2  | 1  | 0  | 0  | 0  | 1  |    |    |    |    |    |    |    |    |    |    |    |    |    |    |    |    |    |   |

|                                                 |             |      |    |    |    |    |    |    |    |    |    |    |    |    |    |    |    |     |     |    |    |    |    |    |    |    |    |    |    |    |    |    |   |
|-------------------------------------------------|-------------|------|----|----|----|----|----|----|----|----|----|----|----|----|----|----|----|-----|-----|----|----|----|----|----|----|----|----|----|----|----|----|----|---|
| ENSP00000252785,ENSP00000252785,ENSP00000252785 | SCO2        | 27   | 1  | 0  | 1  | 2  | 1  | 1  | 1  | 1  | 0  | 0  | 0  | 1  | 1  | 0  | 1  | 1   | 1   | 1  | 2  | 1  | 1  | 1  | 1  | 1  | 1  | 2  | 1  | 0  | 1  | 1  |   |
| ENSP00000252809,ENSP00000252809,ENSP00000252809 | LSF15       | 19   | 0  | 0  | 0  | 0  | 2  | 1  | 0  | 2  | 0  | 0  | 0  | 0  | 0  | 0  | 0  | 1   | 3   | 4  | 1  | 0  | 0  | 1  | 0  | 1  | 0  | 1  | 1  | 0  | 0  | 0  |   |
| ENSP00000252816,ENSP00000252816,ENSP00000252816 | GDMA        | 184  | 6  | 5  | 7  | 7  | 8  | 6  | 5  | 0  | 4  | 3  | 3  | 5  | 3  | 5  | 8  | 6   | 12  | 6  | 7  | 7  | 6  | 7  | 11 | 6  | 4  | 9  | 4  | 8  | 9  | 7  |   |
| ENSP00000252818,ENSP00000252818,ENSP00000252818 | JUND        | 19   | 0  | 0  | 0  | 0  | 1  | 1  | 0  | 0  | 0  | 0  | 0  | 1  | 0  | 1  | 1  | 0   | 1   | 0  | 2  | 1  | 0  | 1  | 2  | 2  | 0  | 0  | 0  | 1  | 1  | 2  |   |
| ENSP00000252826,ENSP00000252826,ENSP00000252826 | TRPM4       | 28   | 2  | 1  | 0  | 2  | 3  | 2  | 3  | 2  | 0  | 0  | 0  | 0  | 0  | 0  | 1  | 0   | 0   | 1  | 0  | 2  | 1  | 0  | 1  | 2  | 0  | 1  | 1  | 1  | 0  | 1  |   |
| ENSP00000252889,rs31063,ENSP00000252889         | NUMBL       | 17   | 0  | 0  | 0  | 1  | 0  | 0  | 0  | 0  | 0  | 0  | 0  | 1  | 0  | 1  | 0  | 0   | 1   | 0  | 1  | 0  | 2  | 2  | 1  | 1  | 0  | 1  | 3  | 0  | 1  | 0  |   |
| ENSP00000252891,ENSP00000252891,ENSP00000252891 | ATXN10      | 15   | 0  | 1  | 1  | 0  | 0  | 0  | 1  | 1  | 1  | 0  | 0  | 1  | 1  | 0  | 0  | 0   | 0   | 1  | 0  | 1  | 0  | 1  | 2  | 0  | 0  | 1  | 1  | 0  | 2  | 0  | 0 |
| ENSP00000252934,ENSP00000252934,ENSP00000252934 | TUBGCP2     | 232  | 12 | 3  | 7  | 10 | 12 | 5  | 6  | 4  | 3  | 4  | 1  | 3  | 11 | 10 | 8  | 9   | 12  | 7  | 9  | 15 | 10 | 6  | 3  | 7  | 8  | 11 | 5  | 13 | 10 | 8  |   |
| ENSP00000252936,ENSP00000252936,ENSP00000252936 | CCDC21      | 56   | 3  | 0  | 0  | 2  | 6  | 5  | 6  | 1  | 1  | 0  | 0  | 0  | 3  | 0  | 1  | 3   | 0   | 2  | 5  | 1  | 1  | 0  | 0  | 1  | 2  | 3  | 1  | 0  | 3  | 0  |   |
| ENSP00000252992,ENSP00000252992,ENSP00000252992 | TAF4        | 23   | 1  | 0  | 0  | 0  | 0  | 0  | 2  | 1  | 0  | 0  | 0  | 1  | 0  | 0  | 0  | 1   | 3   | 0  | 3  | 2  | 2  | 0  | 1  | 0  | 0  | 1  | 1  | 1  | 0  | 1  |   |
| ENSP00000252996,ENSP00000252996,ENSP00000252996 | TAF4        | 38   | 3  | 1  | 0  | 2  | 1  | 2  | 3  | 0  | 0  | 2  | 1  | 0  | 1  | 2  | 3  | 0   | 1   | 2  | 2  | 0  | 2  | 1  | 3  | 1  | 1  | 1  | 0  | 1  | 1  | 1  |   |
| ENSP00000252996,rs31063,ENSP00000252996         | LAMAS       | 32   | 2  | 1  | 0  | 1  | 1  | 2  | 2  | 0  | 0  | 1  | 1  | 0  | 1  | 0  | 1  | 2   | 3   | 0  | 1  | 2  | 2  | 0  | 2  | 1  | 3  | 0  | 1  | 1  | 0  | 1  |   |
| ENSP00000252999,ENSP00000252999,ENSP00000252999 | ADRM1       | 79   | 25 | 20 | 14 | 0  | 0  | 0  | 4  | 3  | 1  | 1  | 0  | 1  | 0  | 0  | 0  | 2   | 0   | 0  | 0  | 0  | 0  | 2  | 0  | 1  | 1  | 4  | 0  | 0  | 0  | 0  |   |
| ENSP00000253003,ENSP00000253003,ENSP00000253003 | ASS1        | 66   | 6  | 2  | 3  | 2  | 2  | 1  | 1  | 1  | 2  | 3  | 0  | 2  | 2  | 3  | 2  | 1   | 4   | 2  | 2  | 4  | 2  | 2  | 1  | 1  | 3  | 1  | 4  | 2  | 3  | 2  |   |
| ENSP00000253004,ENSP00000253004,ENSP00000253004 | UBE2MP1,UBE | 250  | 4  | 2  | 5  | 11 | 14 | 18 | 7  | 5  | 6  | 5  | 2  | 7  | 11 | 5  | 11 | 5   | 8   | 6  | 16 | 12 | 11 | 11 | 10 | 11 | 10 | 15 | 15 | 2  | 2  | 3  |   |
| ENSP00000253023,ENSP00000253023,ENSP00000253023 | UBE2MP1,UBE | 171  | 10 | 6  | 6  | 4  | 6  | 6  | 5  | 6  | 4  | 9  | 3  | 5  | 4  | 2  | 3  | 7   | 7   | 8  | 7  | 5  | 8  | 4  | 4  | 7  | 4  | 6  | 7  | 6  | 5  |    |   |
| ENSP00000253023,rs31063,ENSP00000253023         | TRIM28      | 176  | 10 | 5  | 6  | 4  | 6  | 6  | 5  | 6  | 4  | 9  | 3  | 5  | 5  | 3  | 4  | 7   | 7   | 6  | 10 | 9  | 7  | 6  | 4  | 4  | 7  | 4  | 6  | 7  | 6  | 5  |   |
| ENSP00000253039,ENSP00000253039,ENSP00000253039 | EIF2H3      | 1202 | 56 | 42 | 52 | 18 | 24 | 30 | 26 | 23 | 36 | 83 | 50 | 43 | 24 | 32 | 32 | 32  | 45  | 34 | 29 | 53 | 42 | 47 | 29 | 33 | 51 | 43 | 37 | 66 | 47 | 43 |   |
| ENSP00000253048,ENSP00000253048,ENSP00000253048 | ZFCH3       | 383  | 15 | 8  | 8  | 15 | 22 | 14 | 14 | 12 | 7  | 15 | 8  | 10 | 11 | 14 | 11 | 16  | 21  | 10 | 15 | 20 | 10 | 11 | 9  | 11 | 17 | 6  | 17 | 13 | 14 |    |   |
| ENSP00000253063,ENSP00000253063,ENSP00000253063 | SESN2       | 65   | 1  | 2  | 3  | 4  | 2  | 4  | 3  | 3  | 1  | 1  | 2  | 2  | 0  | 0  | 3  | 0   | 1   | 2  | 6  | 1  | 3  | 2  | 4  | 3  | 3  | 0  | 2  | 1  | 3  | 3  |   |
| ENSP00000253083,ENSP00000253083,ENSP00000253083 | HIPIR       | 26   | 0  | 0  | 0  | 0  | 1  | 1  | 0  | 0  | 0  | 0  | 0  | 0  | 0  | 0  | 0  | 0   | 0   | 0  | 0  | 0  | 0  | 0  | 0  | 0  | 1  | 0  | 11 | 4  | 4  |    |   |
| ENSP00000253099,ENSP00000253099,ENSP00000253099 | MRPL4       | 141  | 3  | 1  | 0  | 0  | 8  | 10 | 12 | 8  | 8  | 3  | 1  | 0  | 0  | 3  | 7  | 6   | 7   | 8  | 8  | 5  | 9  | 3  | 8  | 4  | 1  | 4  | 1  | 3  | 2  | 5  | 3 |
| ENSP00000253107,ENSP00000253107,ENSP00000253107 | PFAN        | 47   | 1  | 1  | 2  | 0  | 3  | 1  | 1  | 3  | 0  | 4  | 3  | 1  | 2  | 0  | 1  | 1   | 3   | 0  | 0  | 1  | 1  | 4  | 2  | 2  | 2  | 3  | 1  | 2  | 2  | 0  |   |
| ENSP00000253108,ENSP00000253108,ENSP00000253108 | EIF3G       | 70   | 2  | 4  | 2  | 4  | 4  | 1  | 1  | 1  | 2  | 1  | 3  | 2  | 1  | 3  | 2  | 1   | 3   | 1  | 3  | 4  | 2  | 4  | 3  | 2  | 2  | 3  | 1  | 3  | 3  | 2  |   |
| ENSP00000253237,ENSP00000253237,ENSP00000253237 | GRWD1       | 264  | 12 | 9  | 8  | 9  | 8  | 7  | 9  | 4  | 11 | 9  | 5  | 6  | 5  | 9  | 8  | 7   | 6   | 9  | 12 | 7  | 10 | 10 | 6  | 4  | 20 | 8  | 11 | 12 | 10 | 13 |   |
| ENSP00000253237,rs23029,ENSP00000253237         | GRWD1       | 60   | 2  | 3  | 1  | 2  | 1  | 1  | 0  | 2  | 2  | 3  | 0  | 1  | 2  | 0  | 3  | 2   | 3   | 2  | 5  | 2  | 1  | 0  | 1  | 2  | 4  | 3  | 1  | 6  | 3  | 2  |   |
| ENSP00000253247,rs23029,ENSP00000253247         | NOL1        | 57   | 2  | 1  | 1  | 2  | 2  | 1  | 0  | 1  | 2  | 3  | 0  | 0  | 3  | 1  | 3  | 2   | 4   | 1  | 4  | 3  | 1  | 0  | 1  | 2  | 4  | 2  | 1  | 5  | 3  | 2  |   |
| ENSP00000253251,ENSP00000253251,ENSP00000253251 | UBE4B       | 143  | 4  | 1  | 4  | 4  | 2  | 2  | 4  | 4  | 5  | 7  | 2  | 4  | 7  | 2  | 5  | 7   | 7   | 6  | 4  | 7  | 8  | 1  | 4  | 5  | 2  | 5  | 8  | 5  | 10 | 10 |   |
| ENSP00000253329,ENSP00000253329,ENSP00000253329 | PIPL4       | 45   | 0  | 0  | 0  | 2  | 1  | 3  | 2  | 1  | 0  | 2  | 1  | 0  | 2  | 3  | 2  | 0   | 2   | 1  | 2  | 0  | 4  | 1  | 0  | 0  | 7  | 4  | 3  | 1  | 1  | 0  |   |
| ENSP00000253332,rs10872,ENSP00000253332         | AKAP12      | 154  | 5  | 5  | 3  | 2  | 1  | 1  | 2  | 3  | 4  | 7  | 4  | 4  | 4  | 7  | 6  | 3   | 5   | 8  | 4  | 6  | 5  | 10 | 8  | 5  | 8  | 4  | 3  | 12 | 10 | 5  |   |
| ENSP00000253332,rs38233,ENSP00000253332         | AKAP12      | 336  | 0  | 0  | 0  | 0  | 0  | 0  | 0  | 0  | 0  | 18 | 3  | 5  | 1  | 0  | 64 | 125 | 105 | 9  | 2  | 1  | 0  | 0  | 0  | 0  | 0  | 0  | 0  | 1  | 0  | 2  |   |
| ENSP00000253363,ENSP00000253363,ENSP00000253363 | AKAP12      | 337  | 0  | 0  | 0  | 0  | 0  | 0  | 0  | 0  | 0  | 18 | 3  | 5  | 1  | 0  | 64 | 125 | 105 | 10 | 2  | 1  | 0  | 0  | 0  | 0  | 0  | 0  | 0  | 1  | 0  | 2  |   |
| ENSP00000253382,ENSP00000253382,ENSP00000253382 | ACCS2       | 278  | 10 | 9  | 5  | 7  | 11 | 5  | 11 | 6  | 15 | 7  | 9  | 9  | 6  | 10 | 6  | 12  | 6   | 8  | 16 | 12 | 17 | 13 | 8  | 9  | 11 | 4  | 9  | 13 | 8  |    |   |
| ENSP00000253413,ENSP00000253413,ENSP00000253413 | ATGVI1E1    | 44   | 3  | 1  | 2  | 2  | 0  | 1  | 2  | 1  | 1  | 1  | 0  | 0  | 1  | 1  | 0  | 3   | 0   | 2  | 3  | 3  | 2  | 0  | 2  | 3  | 5  | 1  | 1  | 1  | 1  | 1  |   |
| ENSP00000253452,ENSP00000253452,ENSP00000253452 | COX4I1      | 161  | 9  | 9  | 7  | 5  | 3  | 6  | 4  | 3  | 2  | 7  | 2  | 6  | 3  | 3  | 4  | 1   | 8   | 4  | 7  | 9  | 5  | 5  | 3  | 4  | 5  | 7  | 6  | 9  | 9  | 6  |   |
| ENSP00000253452,rs31063,ENSP00000253452         | COX4I1      | 352  | 16 | 19 | 4  | 8  | 22 | 13 | 12 | 4  | 6  | 13 | 12 | 11 | 8  | 10 | 7  | 14  | 19  | 8  | 8  | 12 | 7  | 21 | 17 | 11 | 12 | 16 | 6  | 15 | 13 | 8  |   |
| ENSP00000253452,rs31063,ENSP00000253452         | COX4I1      | 351  | 16 | 19 | 4  | 8  | 22 | 13 | 12 | 4  | 6  | 13 | 12 | 11 | 8  | 10 | 7  | 14  | 19  | 8  | 8  | 12 | 7  | 21 | 17 | 11 | 12 | 16 | 6  | 15 | 13 | 8  |   |
| ENSP00000253457,ENSP00000253457,ENSP00000253457 | COX4NB      | 54   | 4  | 2  | 1  | 2  | 2  | 3  | 2  | 1  | 2  | 2  | 0  | 2  | 1  | 0  | 1  | 3   | 1   | 1  | 2  | 3  | 3  | 0  | 0  | 2  | 5  | 2  | 2  | 2  | 1  | 2  |   |
| ENSP00000253462,ENSP00000253462,ENSP00000253462 | GINS2       | 20   | 1  | 1  | 1  | 3  | 1  | 1  | 1  | 0  | 0  | 0  | 0  | 0  | 2  | 0  | 1  | 1   | 1   | 1  | 1  | 0  | 0  | 0  | 0  | 0  | 0  | 0  | 0  | 0  | 0  | 0  |   |
| ENSP00000253481,ENSP00000253481,ENSP00000253481 | SH3BGR1     | 84   | 3  | 4  | 0  | 4  | 10 | 3  | 1  | 2  | 1  | 0  | 0  | 1  | 2  | 1  | 0  | 3   | 5   | 2  | 3  | 5  | 2  | 3  | 2  | 1  | 5  | 6  | 4  | 4  | 4  | 3  |   |
| ENSP00000253577,ENSP00000253577,ENSP00000253577 | ABC87       | 27   | 1  | 0  | 1  | 0  | 1  | 1  | 0  | 0  | 1  | 3  | 0  | 2  | 0  | 0  | 2  | 0   | 0   | 0  | 0  | 1  | 2  | 1  | 1  | 1  | 0  | 0  | 2  | 5  | 0  | 2  |   |
| ENSP00000253669,ENSP00000253669,ENSP00000253669 | HCB1        | 15   | 1  | 0  | 1  | 1  | 0  | 0  | 0  | 0  | 0  | 0  | 0  | 0  | 0  | 1  | 0  | 1   | 0   | 0  | 0  | 3  | 0  | 0  | 0  | 0  | 1  | 2  | 1  | 0  | 2  | 1  |   |
| ENSP00000253686,ENSP00000253686,ENSP00000253686 | MRPS25      | 25   | 2  | 2  | 1  | 0  | 0  | 0  | 0  | 0  | 1  | 2  | 3  | 0  | 0  | 0  | 1  | 0   | 0   | 1  | 1  | 0  | 0  | 2  | 1  | 0  | 3  | 0  | 1  | 3  | 0  | 1  |   |
| ENSP00000253692,rs11384,ENSP00000253692         | TRIM28      | 13   | 2  | 0  | 0  | 1  | 0  | 0  | 1  | 0  | 0  | 1  | 0  | 0  | 0  | 0  | 0  | 1   | 1   | 3  | 1  | 0  | 0  | 0  | 0  | 0  | 0  | 0  | 0  | 0  | 0  | 0  |   |
| ENSP00000253693,ENSP00000253693,ENSP00000253693 | CANP7       | 15   | 1  | 0  | 0  | 0  | 1  | 0  | 1  | 0  | 1  | 0  | 0  | 0  | 0  | 0  | 0  | 1   | 1   | 0  | 2  | 1  | 1  | 0  | 0  | 0  | 3  | 1  | 1  | 0  | 0  | 0  |   |
| ENSP00000253699,ENSP00000253699,ENSP00000253699 | ZFYVE20     | 11   | 1  | 0  | 1  | 0  | 0  | 0  | 0  | 0  | 0  | 0  | 0  | 0  | 0  | 0  | 0  | 2   | 0   | 2  | 1  | 1  | 0  | 0  | 0  | 1  | 0  | 0  | 0  | 1  | 0  | 1  |   |
| ENSP00000253754,ENSP00000253754,ENSP00000253754 | PDJMT4      | 14   | 0  | 0  | 0  | 0  | 0  | 0  | 0  | 0  | 0  | 4  | 7  | 3  | 0  | 0  | 0  | 0   | 0   | 0  | 0  | 0  | 0  | 0  | 0  | 0  | 0  | 0  | 0  | 0  | 0  | 0  |   |
| ENSP00000253778,ENSP00000253778,ENSP00000253778 | GRF72       | 97   | 4  | 2  | 2  | 3  | 5  | 4  | 4  | 3  | 4  | 2  | 1  | 1  | 3  | 1  | 1  | 4   | 6   | 2  | 4  | 3  | 3  | 3  | 3  | 4  | 8  | 5  | 3  | 5  | 2  | 2  |   |
| ENSP00000253788,ENSP00000253788,ENSP00000253788 | RLY2        | 235  | 9  | 7  | 7  | 4  | 10 | 8  | 7  | 5  | 7  | 9  | 4  | 6  | 7  | 13 | 5  | 7   | 9   | 8  | 8  | 10 | 8  | 7  | 7  | 4  | 9  | 13 | 7  | 11 | 9  | 8  |   |
| ENSP00000253792,ENSP00000253792,ENSP00000253792 | ACL1        | 735  | 44 | 21 | 34 | 16 | 23 | 27 | 21 | 10 | 22 | 23 | 6  | 9  | 28 | 9  | 24 | 27  |     |    |    |    |    |    |    |    |    |    |    |    |    |    |   |

|                          |                 |           |     |    |    |    |    |    |    |    |    |    |    |    |    |    |    |    |    |    |    |    |    |    |    |    |    |    |    |    |    |    |    |    |   |
|--------------------------|-----------------|-----------|-----|----|----|----|----|----|----|----|----|----|----|----|----|----|----|----|----|----|----|----|----|----|----|----|----|----|----|----|----|----|----|----|---|
| ENSP00000255681,ENSP000  | ENSG00000133315 | MACROD1   | 79  | 2  | 2  | 1  | 2  | 4  | 2  | 2  | 3  | 4  | 6  | 2  | 2  | 0  | 0  | 0  | 1  | 7  | 5  | 1  | 1  | 3  | 4  | 4  | 3  | 2  | 2  | 3  | 5  | 3  | 3  |    |   |
| ENSP00000255784,ENSP000  | ENSG00000100147 | CCDC134   | 38  | 4  | 2  | 2  | 1  | 1  | 1  | 2  | 0  | 1  | 1  | 1  | 0  | 1  | 3  | 1  | 0  | 1  | 1  | 2  | 2  | 2  | 2  | 1  | 1  | 2  | 2  | 0  | 1  | 0  | 0  |    |   |
| ENSP00000255882,ENSP000  | ENSG00000133511 | PIK4CA    | 41  | 1  | 2  | 1  | 3  | 0  | 3  | 4  | 1  | 3  | 0  | 0  | 2  | 1  | 1  | 0  | 0  | 1  | 3  | 1  | 2  | 2  | 1  | 1  | 3  | 1  | 2  | 0  | 1  | 0  | 1  |    |   |
| ENSP00000256031,ENSP000  | ENSG00000133657 | ATP13A3   | 18  | 0  | 0  | 2  | 2  | 2  | 2  | 2  | 0  | 0  | 0  | 0  | 0  | 0  | 0  | 1  | 2  | 1  | 1  | 0  | 0  | 0  | 0  | 0  | 0  | 0  | 2  | 1  | 0  | 0  | 0  |    |   |
| ENSP00000256031_L72M     | ENSG00000133657 | ATP13A3   | 16  | 0  | 0  | 2  | 1  | 2  | 2  | 1  | 0  | 0  | 0  | 0  | 0  | 0  | 0  | 1  | 1  | 1  | 1  | 0  | 1  | 0  | 0  | 0  | 0  | 0  | 2  | 1  | 0  | 0  | 0  |    |   |
| ENSP00000256079,ENSP000  | ENSG00000133704 | IPO8      | 74  | 4  | 0  | 2  | 3  | 0  | 0  | 2  | 1  | 0  | 1  | 0  | 0  | 0  | 0  | 4  | 3  | 3  | 1  | 2  | 4  | 4  | 3  | 7  | 1  | 3  | 5  | 4  | 5  | 3  | 3  | 6  |   |
| ENSP00000256108          | ENSG00000133731 | IMP1A1    | 87  | 4  | 2  | 1  | 2  | 2  | 1  | 3  | 2  | 3  | 2  | 0  | 1  | 3  | 1  | 1  | 4  | 5  | 3  | 4  | 2  | 3  | 4  | 1  | 3  | 5  | 2  | 2  | 10 | 6  | 5  |    |   |
| ENSP00000256151          | ENSG00000133773 | CCDC59    | 29  | 1  | 1  | 0  | 1  | 0  | 1  | 0  | 1  | 1  | 0  | 1  | 0  | 1  | 1  | 0  | 1  | 2  | 1  | 2  | 1  | 1  | 2  | 2  | 1  | 0  | 1  | 0  | 2  | 2  | 2  |    |   |
| ENSP00000256183,ENSP000  | ENSG00000133805 | AMPD3     | 10  | 0  | 2  | 0  | 2  | 1  | 1  | 0  | 0  | 0  | 0  | 0  | 0  | 0  | 1  | 0  | 0  | 0  | 0  | 0  | 0  | 0  | 0  | 0  | 1  | 0  | 0  | 1  | 1  | 0  | 0  |    |   |
| ENSP00000256190,ENSP000  | ENSG00000133812 | SBF2      | 16  | 0  | 0  | 0  | 1  | 1  | 0  | 2  | 0  | 0  | 0  | 1  | 0  | 0  | 1  | 0  | 2  | 1  | 1  | 0  | 1  | 0  | 1  | 0  | 0  | 0  | 1  | 1  | 1  | 0  | 0  | 1  |   |
| ENSP00000256194,ENSP000  | ENSG00000133816 | MICAL2    | 22  | 2  | 0  | 1  | 0  | 1  | 0  | 3  | 1  | 1  | 0  | 0  | 2  | 0  | 0  | 1  | 0  | 0  | 0  | 0  | 0  | 0  | 0  | 1  | 1  | 4  | 1  | 0  | 1  | 1  | 0  | 1  |   |
| ENSP00000256196          | ENSG00000133818 | RAS2      | 116 | 8  | 5  | 4  | 1  | 0  | 1  | 0  | 1  | 6  | 1  | 2  | 3  | 3  | 3  | 6  | 2  | 1  | 4  | 7  | 5  | 7  | 3  | 4  | 6  | 1  | 3  | 7  | 5  | 2  | 6  | 6  | 4 |
| ENSP00000256216,ENSP000  | ENSG00000133835 | HSD17B4   | 366 | 15 | 9  | 9  | 14 | 14 | 21 | 17 | 12 | 14 | 11 | 3  | 4  | 9  | 5  | 8  | 9  | 9  | 8  | 10 | 9  | 14 | 19 | 14 | 20 | 27 | 26 | 23 | 6  | 5  | 2  |    |   |
| ENSP00000256324,ENSP000  | ENSG00000133943 | C14orf159 | 57  | 2  | 0  | 2  | 0  | 0  | 0  | 0  | 0  | 1  | 0  | 0  | 0  | 1  | 0  | 1  | 0  | 4  | 6  | 5  | 1  | 0  | 0  | 5  | 2  | 4  | 9  | 8  | 3  | 0  | 2  | 1  |   |
| ENSP00000256366          | ENSG00000134363 | SYN2BP    | 30  | 0  | 1  | 0  | 1  | 2  | 2  | 0  | 1  | 1  | 2  | 1  | 1  | 0  | 2  | 1  | 0  | 1  | 1  | 0  | 3  | 1  | 1  | 1  | 1  | 1  | 0  | 1  | 2  | 1  | 1  | 1  |   |
| ENSP00000256379          | ENSG00000133997 | MD6       | 17  | 0  | 1  | 0  | 1  | 0  | 0  | 1  | 1  | 0  | 0  | 0  | 0  | 1  | 2  | 1  | 1  | 1  | 1  | 2  | 1  | 0  | 0  | 1  | 0  | 0  | 0  | 0  | 0  | 0  | 1  | 0  |   |
| ENSP00000256383          | ENSG00000134001 | EIF251    | 407 | 15 | 11 | 13 | 9  | 16 | 14 | 9  | 9  | 12 | 21 | 10 | 10 | 10 | 11 | 13 | 20 | 13 | 17 | 13 | 15 | 19 | 17 | 14 | 8  | 16 | 14 | 10 | 18 | 14 | 16 |    |   |
| ENSP00000256398          | ENSG00000134014 | ELP3      | 31  | 3  | 0  | 0  | 0  | 1  | 1  | 0  | 0  | 0  | 0  | 0  | 0  | 1  | 2  | 0  | 3  | 1  | 1  | 1  | 0  | 1  | 1  | 0  | 1  | 1  | 2  | 1  | 2  | 4  | 2  | 4  |   |
| ENSP00000256429,ENSP000  | ENSG00000134046 | MBD2      | 65  | 0  | 1  | 0  | 2  | 2  | 4  | 2  | 1  | 3  | 4  | 2  | 1  | 2  | 2  | 3  | 3  | 2  | 2  | 2  | 3  | 0  | 2  | 1  | 1  | 3  | 4  | 3  | 3  | 2  | 2  | 3  |   |
| ENSP00000256433          | ENSG00000134049 | IER3IP1   | 15  | 1  | 0  | 1  | 0  | 0  | 0  | 0  | 0  | 1  | 2  | 0  | 0  | 0  | 1  | 0  | 1  | 0  | 0  | 0  | 0  | 2  | 1  | 0  | 1  | 2  | 0  | 1  | 1  | 0  | 0  | 1  |   |
| ENSP00000256441,ENSP000  | ENSG00000134056 | MRP536    | 82  | 3  | 0  | 2  | 2  | 2  | 1  | 2  | 0  | 2  | 6  | 1  | 5  | 1  | 0  | 1  | 1  | 3  | 3  | 3  | 4  | 2  | 8  | 2  | 5  | 3  | 5  | 4  | 5  | 2  | 4  | 4  |   |
| ENSP00000256442,ENSP000  | ENSG00000134057 | CCNB1     | 14  | 1  | 2  | 2  | 1  | 0  | 0  | 0  | 0  | 0  | 0  | 0  | 0  | 0  | 0  | 1  | 0  | 0  | 1  | 2  | 0  | 1  | 0  | 0  | 0  | 1  | 0  | 1  | 0  | 1  | 0  | 1  |   |
| ENSP00000256443          | ENSG00000134058 | CDK7      | 72  | 3  | 3  | 4  | 2  | 2  | 3  | 1  | 1  | 1  | 5  | 1  | 1  | 1  | 1  | 2  | 4  | 2  | 2  | 2  | 3  | 2  | 3  | 1  | 2  | 3  | 1  | 1  | 1  | 7  | 4  | 4  |   |
| ENSP00000256460,ENSP000  | ENSG00000134072 | CAMK1     | 11  | 1  | 0  | 0  | 0  | 0  | 0  | 0  | 0  | 0  | 0  | 0  | 0  | 0  | 0  | 1  | 0  | 0  | 0  | 0  | 0  | 0  | 0  | 0  | 0  | 0  | 2  | 1  | 1  | 0  | 2  | 2  |   |
| ENSP00000256496          | ENSG00000134108 | ARL8B     | 83  | 8  | 2  | 2  | 1  | 3  | 3  | 2  | 3  | 0  | 5  | 1  | 2  | 2  | 3  | 3  | 2  | 4  | 2  | 4  | 3  | 0  | 5  | 1  | 2  | 4  | 5  | 3  | 2  | 4  | 2  | 4  |   |
| ENSP00000256496_V89A     | ENSG00000134108 | ARL8B     | 64  | 6  | 2  | 2  | 1  | 2  | 3  | 1  | 3  | 0  | 3  | 1  | 2  | 1  | 3  | 3  | 1  | 2  | 1  | 3  | 2  | 0  | 6  | 2  | 2  | 2  | 3  | 2  | 2  | 1  | 2  | 2  |   |
| ENSP00000256544          | ENSG00000134152 | C15orf29  | 13  | 0  | 0  | 0  | 0  | 1  | 1  | 2  | 0  | 0  | 0  | 0  | 0  | 0  | 0  | 0  | 1  | 1  | 1  | 0  | 0  | 1  | 0  | 1  | 0  | 1  | 0  | 1  | 0  | 1  | 1  | 0  |   |
| ENSP00000256545          | ENSG00000134153 | C15orf24  | 49  | 4  | 1  | 2  | 5  | 3  | 4  | 4  | 0  | 2  | 1  | 0  | 3  | 0  | 1  | 2  | 0  | 0  | 1  | 4  | 2  | 2  | 2  | 0  | 1  | 0  | 2  | 1  | 1  | 0  | 1  | 2  |   |
| ENSP00000256578,ENSP000  | ENSG00000116337 | AMPD2     | 38  | 2  | 0  | 1  | 0  | 0  | 1  | 0  | 1  | 0  | 0  | 0  | 0  | 0  | 0  | 3  | 1  | 1  | 5  | 1  | 1  | 1  | 0  | 0  | 0  | 1  | 2  | 2  | 1  | 7  | 3  | 4  |   |
| ENSP00000256593_T4I,R78C | ENSG00000134201 | GSTM5     | 12  | 0  | 0  | 0  | 0  | 0  | 0  | 0  | 0  | 0  | 0  | 0  | 0  | 0  | 0  | 0  | 0  | 0  | 0  | 0  | 0  | 0  | 0  | 0  | 1  | 0  | 0  | 0  | 4  | 4  | 2  |    |   |
| ENSP00000256594,ENSP000  | ENSG00000134202 | GSTM3     | 83  | 4  | 1  | 2  | 0  | 0  | 0  | 0  | 0  | 0  | 0  | 0  | 0  | 0  | 0  | 11 | 2  | 12 | 0  | 0  | 0  | 10 | 11 | 10 | 2  | 0  | 0  | 0  | 0  | 8  | 6  | 4  |   |
| ENSP00000256637          | ENSG00000134243 | SORT1     | 27  | 3  | 2  | 1  | 1  | 2  | 0  | 0  | 2  | 0  | 1  | 2  | 0  | 2  | 1  | 0  | 0  | 1  | 1  | 5  | 2  | 1  | 0  | 0  | 0  | 1  | 0  | 0  | 0  | 0  | 0  | 0  | 0 |
| ENSP00000256646,ENSP000  | ENSG00000134250 | NOTCH2    | 28  | 1  | 0  | 1  | 1  | 0  | 0  | 0  | 0  | 0  | 0  | 0  | 1  | 1  | 1  | 2  | 0  | 0  | 0  | 0  | 2  | 4  | 5  | 0  | 1  | 0  | 0  | 1  | 0  | 2  | 2  | 3  |   |
| ENSP00000256658,ENSP000  | ENSG00000134262 | AP4B1     | 29  | 1  | 1  | 0  | 1  | 1  | 0  | 1  | 2  | 0  | 2  | 0  | 1  | 2  | 0  | 1  | 0  | 1  | 2  | 1  | 4  | 0  | 0  | 0  | 0  | 1  | 0  | 3  | 2  | 2  | 0  | 4  |   |
| ENSP00000256678,ENSP000  | ENSG00000134283 | PPH1N     | 29  | 2  | 0  | 0  | 0  | 0  | 0  | 1  | 3  | 0  | 0  | 1  | 0  | 0  | 1  | 0  | 3  | 0  | 1  | 1  | 4  | 1  | 2  | 1  | 1  | 2  | 0  | 0  | 0  | 3  | 1  | 1  |   |
| ENSP00000256680          | ENSG00000134285 | KFBP11    | 87  | 5  | 3  | 8  | 2  | 1  | 1  | 1  | 1  | 3  | 8  | 2  | 1  | 1  | 1  | 1  | 0  | 0  | 0  | 1  | 2  | 2  | 9  | 4  | 6  | 1  | 2  | 0  | 6  | 7  | 8  | 8  |   |
| ENSP00000256689,ENSP000  | ENSG00000134294 | SLC38A2   | 23  | 1  | 0  | 2  | 0  | 0  | 1  | 0  | 0  | 1  | 1  | 0  | 0  | 0  | 1  | 1  | 2  | 1  | 2  | 0  | 0  | 1  | 1  | 0  | 1  | 1  | 1  | 0  | 0  | 1  | 3  |    |   |
| ENSP00000256707,ENSP000  | ENSG00000134313 | KIDINS220 | 16  | 2  | 2  | 1  | 0  | 0  | 0  | 0  | 0  | 0  | 0  | 0  | 1  | 0  | 2  | 0  | 1  | 0  | 0  | 1  | 0  | 0  | 0  | 0  | 0  | 0  | 3  | 0  | 1  | 0  | 0  | 0  |   |
| ENSP00000256830,ENSP000  | ENSG00000049759 | NEDD4L    | 76  | 6  | 6  | 1  | 2  | 1  | 3  | 1  | 1  | 0  | 0  | 4  | 0  | 0  | 2  | 3  | 5  | 1  | 3  | 2  | 5  | 1  | 6  | 0  | 4  | 0  | 5  | 4  | 2  | 1  | 6  | 1  |   |
| ENSP00000256854          | ENSG00000134440 | NARS      | 576 | 18 | 10 | 10 | 14 | 17 | 18 | 16 | 7  | 16 | 10 | 4  | 5  | 21 | 14 | 16 | 31 | 26 | 25 | 27 | 24 | 26 | 19 | 15 | 20 | 33 | 35 | 28 | 32 | 17 | 22 | 22 |   |
| ENSP00000256897,ENSP000  | ENSG00000134480 | CNNH      | 30  | 2  | 0  | 1  | 0  | 0  | 0  | 2  | 0  | 1  | 1  | 0  | 0  | 0  | 1  | 0  | 1  | 2  | 0  | 2  | 1  | 0  | 0  | 1  | 1  | 0  | 2  | 1  | 0  | 4  | 3  | 4  |   |
| ENSP00000256996,ENSP000  | ENSG00000134574 | DBR2      | 14  | 0  | 0  | 0  | 1  | 1  | 1  | 0  | 0  | 0  | 0  | 0  | 2  | 1  | 0  | 0  | 1  | 0  | 0  | 1  | 0  | 0  | 0  | 1  | 1  | 0  | 0  | 0  | 1  | 0  | 1  | 0  |   |
| ENSP00000257020,ENSP000  | ENSG00000134597 | RBMX2     | 41  | 3  | 1  | 1  | 3  | 0  | 1  | 1  | 1  | 1  | 1  | 1  | 2  | 1  | 1  | 0  | 2  | 2  | 0  | 1  | 2  | 2  | 4  | 1  | 0  | 1  | 2  | 2  | 1  | 2  | 1  | 1  |   |
| ENSP00000257075          | ENSG00000134644 | PUM1      | 139 | 7  | 4  | 1  | 6  | 5  | 2  | 7  | 2  | 7  | 1  | 2  | 3  | 6  | 5  | 8  | 4  | 7  | 5  | 5  | 11 | 4  | 5  | 3  | 4  | 6  | 6  | 2  | 4  | 3  | 4  | 4  |   |
| ENSP00000257118,ENSP000  | ENSG00000134686 | PHC2      | 64  | 2  | 1  | 1  | 2  | 1  | 2  | 1  | 2  | 2  | 3  | 3  | 1  | 2  | 2  | 1  | 3  | 2  | 2  | 2  | 1  | 3  | 1  | 4  | 3  | 2  | 3  | 1  | 2  | 3  | 3  | 4  |   |
| ENSP00000257177,ENSP000  | ENSG00000134744 | ZCCHC11   | 14  | 0  | 0  | 1  | 0  | 0  | 1  | 0  | 0  | 0  | 0  | 1  | 0  | 1  | 2  | 0  | 0  | 0  | 0  | 0  | 1  | 0  | 1  | 1  | 0  | 1  | 3  | 1  | 0  | 0  | 0  | 0  |   |
| ENSP00000257181          | ENSG00000134748 | PRPF38A   | 77  | 1  | 1  | 2  | 4  | 2  | 4  | 2  | 3  | 2  | 1  | 2  | 1  | 3  | 4  | 1  | 1  | 3  | 1  | 5  | 3  | 1  | 4  | 3  | 3  | 5  | 1  | 2  | 5  | 4  | 3  |    |   |
| ENSP00000257189,ENSP000  | ENSG00000134757 | DSG3      | 22  | 0  | 0  | 0  | 0  | 0  | 0  | 0  | 0  | 0  | 0  | 0  | 0  | 0  | 0  | 0  | 0  | 0  | 0  | 0  | 0  | 0  | 0  | 10 | 7  | 5  | 0  | 0  | 0  | 0  | 0  | 0  |   |
| ENSP00000257191_rs17859  | ENSG00000134759 | ELP2      | 22  | 1  | 0  | 0  | 1  | 0  | 0  | 1  | 0  | 1  | 0  | 0  | 0  | 0  | 1  | 0  | 1  | 3  | 1  | 1  | 1  | 1  | 0  | 1  | 0  | 0  | 3  | 0  | 0  | 2  | 1  | 2  |   |
| ENSP00000257245          | ENSG00000134809 | TEM110    | 86  | 2  | 3  | 2  | 3  | 4  | 1  | 2  | 2  | 2  | 4  | 4  | 2  | 2  | 3  | 3  | 1  | 1  | 1  | 5  | 2  | 2  | 6  | 6  | 2  | 4  | 3  | 2  | 3  | 6  | 3  |    |   |
| ENSP00000257287,ENSP000  | ENSG00000134799 | CIMP135   | 11  | 0  | 0  | 0  |    |    |    |    |    |    |    |    |    |    |    |    |    |    |    |    |    |    |    |    |    |    |    |    |    |    |    |    |   |

|                         |                  |              |      |    |    |    |    |    |    |    |    |    |    |      |    |    |    |    |    |    |    |    |     |    |    |    |    |    |    |    |    |    |    |   |
|-------------------------|------------------|--------------|------|----|----|----|----|----|----|----|----|----|----|------|----|----|----|----|----|----|----|----|-----|----|----|----|----|----|----|----|----|----|----|---|
| ENSP00000258729         | ENSG00000136231  | IGF2BP3      | 157  | 16 | 11 | 13 | 2  | 2  | 2  | 6  | 6  | 8  | 6  | 1    | 2  | 1  | 1  | 3  | 3  | 4  | 5  | 3  | 6   | 7  | 5  | 2  | 5  | 8  | 7  | 6  | 6  | 5  | 5  |   |
| ENSP00000258742,ENSP000 | ENSG00000136243  | NUP2         | 12   | 1  | 0  | 0  | 1  | 0  | 1  | 0  | 0  | 1  | 0  | 0    | 0  | 1  | 0  | 0  | 2  | 0  | 0  | 0  | 1   | 0  | 0  | 0  | 2  | 1  | 0  | 0  | 0  | 1  |    |   |
| ENSP00000258761         | ENSG00000136261  | BZLF1        | 145  | 9  | 4  | 8  | 3  | 4  | 2  | 7  | 5  | 8  | 5  | 2    | 0  | 6  | 3  | 6  | 1  | 3  | 4  | 5  | 6   | 8  | 2  | 2  | 2  | 7  | 5  | 4  | 11 | 4  | 5  |   |
| ENSP00000258770,ENSP000 | ENSG00000136270  | TBRG4        | 98   | 3  | 4  | 4  | 1  | 4  | 2  | 2  | 3  | 4  | 4  | 2    | 4  | 0  | 1  | 4  | 2  | 3  | 4  | 2  | 4   | 4  | 8  | 6  | 4  | 5  | 1  | 2  | 2  | 4  | 5  |   |
| ENSP00000258772,ENSP000 | ENSG00000136271  | DDX56        | 152  | 7  | 4  | 6  | 6  | 2  | 3  | 5  | 6  | 3  | 9  | 6    | 8  | 5  | 4  | 3  | 1  | 4  | 4  | 8  | 3   | 4  | 10 | 6  | 7  | 3  | 4  | 4  | 8  | 6  | 3  |   |
| ENSP00000258780         | ENSG00000136279  | DBNL         | 151  | 6  | 9  | 5  | 3  | 6  | 6  | 5  | 3  | 6  | 4  | 3    | 3  | 2  | 7  | 7  | 3  | 1  | 2  | 4  | 12  | 3  | 11 | 6  | 2  | 5  | 5  | 3  | 7  | 4  | 8  |   |
| ENSP00000258796,ENSP000 | ENSG00000136295  | TTYH3        | 12   | 0  | 0  | 1  | 0  | 0  | 1  | 0  | 1  | 2  | 3  | 0    | 1  | 0  | 0  | 0  | 0  | 0  | 0  | 0  | 0   | 0  | 1  | 0  | 0  | 0  | 0  | 0  | 0  | 0  | 2  |   |
| ENSP00000258874,ENSP000 | ENSG00000136371  | MTMFS        | 51   | 0  | 1  | 1  | 2  | 2  | 2  | 5  | 2  | 1  | 2  | 3    | 2  | 1  | 4  | 2  | 2  | 1  | 3  | 3  | 1   | 2  | 0  | 2  | 1  | 0  | 1  | 0  | 3  | 1  | 1  |   |
| ENSP00000258884         | ENSG00000136379  | FAM108C1     | 14   | 0  | 0  | 0  | 0  | 0  | 2  | 1  | 1  | 0  | 0  | 0    | 0  | 0  | 0  | 0  | 0  | 0  | 0  | 0  | 1   | 0  | 2  | 1  | 1  | 0  | 4  | 1  | 0  | 0  | 0  |   |
| ENSP00000258886,ENSP000 | ENSG00000136381  | IREB2        | 18   | 3  | 0  | 1  | 4  | 0  | 0  | 2  | 1  | 1  | 0  | 0    | 0  | 0  | 1  | 0  | 0  | 0  | 0  | 1  | 2   | 0  | 0  | 0  | 0  | 1  | 1  | 0  | 0  | 0  | 0  |   |
| ENSP00000258947,ENSP000 | ENSG00000136436  | CALCOCO2     | 23   | 4  | 2  | 0  | 1  | 0  | 1  | 0  | 1  | 0  | 0  | 0    | 0  | 2  | 1  | 0  | 4  | 0  | 1  | 1  | 2   | 0  | 0  | 0  | 0  | 0  | 1  | 0  | 1  | 1  | 0  |   |
| ENSP00000258960         | ENSG00000136448  | NMT1         | 82   | 3  | 1  | 2  | 3  | 3  | 3  | 0  | 2  | 2  | 3  | 2    | 1  | 1  | 7  | 2  | 2  | 0  | 4  | 2  | 2   | 7  | 3  | 2  | 1  | 5  | 3  | 3  | 5  | 4  | 4  |   |
| ENSP00000258962         | ENSG00000136450  | SFRS1        | 753  | 19 | 30 | 18 | 20 | 36 | 15 | 28 | 28 | 18 | 31 | 33   | 19 | 23 | 29 | 20 | 17 | 45 | 18 | 22 | 32  | 18 | 30 | 34 | 26 | 21 | 30 | 16 | 27 | 29 | 21 |   |
| ENSP00000258975,ENSP000 | ENSG00000136463  | CCDC44       | 63   | 3  | 1  | 2  | 3  | 1  | 3  | 0  | 0  | 2  | 7  | 0    | 2  | 2  | 1  | 2  | 3  | 1  | 3  | 2  | 0   | 4  | 2  | 0  | 2  | 6  | 1  | 2  | 4  | 0  | 4  |   |
| ENSP00000259021,ENSP000 | ENSG00000136504  | MYT2         | 13   | 2  | 3  | 2  | 0  | 0  | 0  | 0  | 0  | 0  | 0  | 0    | 1  | 0  | 0  | 0  | 0  | 0  | 0  | 0  | 0   | 1  | 2  | 0  | 0  | 1  | 0  | 0  | 0  | 0  | 0  |   |
| ENSP00000259034         | ENSG00000136518  | ACTL6A       | 233  | 13 | 7  | 5  | 10 | 12 | 9  | 8  | 2  | 9  | 10 | 3    | 7  | 10 | 4  | 7  | 5  | 6  | 5  | 13 | 11  | 8  | 10 | 6  | 8  | 9  | 11 | 5  | 3  | 10 | 7  |   |
| ENSP00000259034_V44A    | ENSG00000136518  | ACTL6A       | 152  | 8  | 5  | 3  | 7  | 6  | 6  | 6  | 2  | 7  | 7  | 3    | 5  | 4  | 4  | 3  | 2  | 2  | 2  | 9  | 8   | 5  | 6  | 5  | 5  | 6  | 6  | 3  | 3  | 8  | 6  |   |
| ENSP00000259037,ENSP000 | ENSG00000136521  | NDUF85       | 46   | 1  | 3  | 2  | 3  | 2  | 1  | 1  | 1  | 2  | 3  | 2    | 1  | 0  | 0  | 2  | 1  | 1  | 2  | 1  | 2   | 1  | 3  | 1  | 2  | 2  | 0  | 2  | 3  | 0  | 1  |   |
| ENSP00000259038,ENSP000 | ENSG00000136522  | MRPL47       | 106  | 2  | 4  | 2  | 4  | 7  | 5  | 3  | 2  | 3  | 5  | 2    | 4  | 3  | 3  | 2  | 6  | 4  | 2  | 4  | 2   | 3  | 6  | 3  | 3  | 7  | 4  | 2  | 3  | 3  | 8  |   |
| ENSP00000259043,ENSP000 | ENSG00000136527  | TPAZ7        | 228  | 10 | 5  | 9  | 5  | 12 | 8  | 6  | 2  | 4  | 14 | 7    | 8  | 4  | 3  | 8  | 3  | 11 | 5  | 9  | 8   | 8  | 13 | 7  | 11 | 10 | 4  | 9  | 6  | 11 | 3  |   |
| ENSP00000259056,ENSP000 | ENSG00000136542  | GALNT5       | 32   | 0  | 0  | 0  | 4  | 4  | 5  | 0  | 0  | 0  | 0  | 0    | 0  | 1  | 0  | 1  | 0  | 0  | 1  | 3  | 1   | 0  | 5  | 4  | 3  | 0  | 0  | 0  | 0  | 0  | 0  |   |
| ENSP00000259154,ENSP000 | ENSG00000136636  | KCTD3        | 17   | 0  | 0  | 0  | 4  | 1  | 1  | 1  | 0  | 1  | 1  | 1    | 0  | 1  | 0  | 0  | 0  | 0  | 1  | 0  | 0   | 0  | 1  | 1  | 0  | 0  | 1  | 0  | 1  | 0  | 1  |   |
| ENSP00000259199,ENSP000 | ENSG00000136682  | CBWD2        | 22   | 2  | 0  | 0  | 0  | 0  | 1  | 0  | 0  | 0  | 0  | 0    | 0  | 2  | 0  | 2  | 1  | 1  | 2  | 2  | 1   | 3  | 0  | 0  | 0  | 1  | 1  | 2  | 0  | 0  | 1  |   |
| ENSP00000259217,ENSP000 | ENSG00000136699  | SMPD4        | 34   | 5  | 2  | 1  | 0  | 2  | 1  | 0  | 1  | 0  | 2  | 2    | 2  | 2  | 1  | 1  | 0  | 0  | 0  | 2  | 2   | 0  | 1  | 1  | 2  | 1  | 1  | 0  | 1  | 1  | 0  |   |
| ENSP00000259229,ENSP000 | ENSG00000136710  | CCDC115      | 23   | 3  | 1  | 2  | 1  | 1  | 1  | 0  | 1  | 0  | 0  | 1    | 1  | 0  | 1  | 0  | 0  | 1  | 2  | 1  | 1   | 0  | 1  | 1  | 0  | 0  | 0  | 1  | 1  | 1  | 1  |   |
| ENSP00000259235         | ENSG00000136715  | SAP130       | 15   | 3  | 0  | 0  | 1  | 1  | 0  | 0  | 0  | 1  | 0  | 0    | 2  | 0  | 0  | 0  | 0  | 1  | 1  | 0  | 1   | 0  | 0  | 0  | 0  | 0  | 2  | 1  | 0  | 0  | 1  |   |
| ENSP00000259237,ENSP000 | ENSG00000136717  | BIN1         | 134  | 13 | 11 | 9  | 6  | 7  | 6  | 3  | 2  | 2  | 2  | 0    | 1  | 5  | 5  | 6  | 3  | 6  | 3  | 6  | 8   | 3  | 0  | 1  | 1  | 5  | 5  | 4  | 2  | 5  | 4  |   |
| ENSP00000259239,ENSP000 | ENSG00000136718  | IMP4         | 67   | 3  | 0  | 0  | 0  | 1  | 0  | 2  | 2  | 5  | 0  | 3    | 2  | 2  | 3  | 2  | 4  | 4  | 3  | 3  | 2   | 4  | 0  | 1  | 1  | 5  | 1  | 4  | 7  | 1  | 2  |   |
| ENSP00000259253,ENSP000 | ENSG00000136731  | UGCG11       | 483  | 15 | 18 | 18 | 17 | 22 | 21 | 15 | 11 | 19 | 20 | 6    | 12 | 13 | 9  | 15 | 18 | 17 | 14 | 12 | 18  | 20 | 22 | 10 | 16 | 25 | 20 | 18 | 18 | 12 | 12 |   |
| ENSP00000259324,ENSP000 | ENSG00000136802  | LRR8C8A      | 29   | 0  | 2  | 0  | 5  | 1  | 0  | 1  | 0  | 0  | 0  | 1    | 1  | 1  | 2  | 1  | 1  | 1  | 0  | 0  | 0   | 0  | 1  | 0  | 1  | 2  | 1  | 2  | 1  | 2  | 2  |   |
| ENSP00000259335,ENSP000 | ENSG00000136813  | AC03A368     | 228  | 6  | 3  | 10 | 6  | 2  | 3  | 6  | 3  | 9  | 9  | 1    | 3  | 6  | 5  | 8  | 9  | 10 | 6  | 7  | 8   | 6  | 6  | 3  | 3  | 18 | 12 | 9  | 21 | 15 | 15 |   |
| ENSP00000259339,ENSP000 | ENSG00000136816  | TOR1B        | 54   | 2  | 2  | 1  | 1  | 3  | 2  | 5  | 2  | 2  | 1  | 1    | 1  | 2  | 1  | 2  | 1  | 1  | 2  | 2  | 3   | 1  | 0  | 2  | 0  | 0  | 0  | 0  | 4  | 6  | 4  |   |
| ENSP00000259400         | ENSG00000136874  | STX17        | 24   | 1  | 0  | 0  | 0  | 1  | 1  | 0  | 1  | 2  | 1  | 0    | 0  | 3  | 0  | 2  | 0  | 2  | 0  | 2  | 1   | 1  | 1  | 0  | 0  | 0  | 0  | 1  | 2  | 0  | 2  |   |
| ENSP00000259406,ENSP000 | ENSG00000138835  | RGS3         | 13   | 2  | 1  | 1  | 1  | 0  | 0  | 2  | 0  | 0  | 0  | 1    | 0  | 0  | 0  | 0  | 2  | 0  | 1  | 1  | 0   | 0  | 1  | 0  | 0  | 0  | 0  | 0  | 1  | 0  | 0  |   |
| ENSP00000259457,ENSP000 | ENSG00000136930  | SNMB7        | 254  | 13 | 5  | 9  | 11 | 7  | 12 | 9  | 3  | 5  | 11 | 3    | 8  | 6  | 4  | 11 | 5  | 7  | 11 | 11 | 13  | 9  | 4  | 8  | 15 | 2  | 11 | 9  | 9  | 12 | 0  |   |
| ENSP00000259469         | ENSG00000136942  | RPL35P2,RPL3 | 183  | 8  | 11 | 5  | 2  | 10 | 4  | 3  | 5  | 5  | 8  | 7    | 2  | 6  | 7  | 6  | 5  | 5  | 5  | 4  | 10  | 7  | 7  | 6  | 4  | 7  | 7  | 4  | 9  | 8  | 6  |   |
| ENSP00000259477,ENSP000 | ENSG00000136950  | ARPC5L       | 66   | 3  | 3  | 2  | 1  | 4  | 2  | 3  | 4  | 2  | 2  | 1    | 2  | 2  | 4  | 1  | 3  | 3  | 1  | 2  | 3   | 0  | 1  | 2  | 1  | 1  | 2  | 1  | 4  | 4  | 2  |   |
| ENSP00000259569         | ENSG00000137040  | RANBP6       | 142  | 7  | 8  | 6  | 6  | 6  | 5  | 6  | 3  | 4  | 3  | 1    | 4  | 6  | 3  | 4  | 4  | 5  | 6  | 8  | 4   | 2  | 4  | 2  | 4  | 5  | 8  | 3  | 7  | 5  | 3  |   |
| ENSP00000259667         | ENSG00000137133  | HINT2        | 111  | 5  | 4  | 3  | 4  | 5  | 5  | 4  | 3  | 3  | 4  | 4    | 5  | 3  | 3  | 4  | 1  | 3  | 5  | 4  | 2   | 7  | 3  | 1  | 4  | 7  | 4  | 6  | 2  | 1  | 2  |   |
| ENSP00000259708,ENSP000 | ENSG00000137171  | KLC4         | 56   | 7  | 4  | 3  | 1  | 2  | 0  | 8  | 10 | 4  | 0  | 0    | 0  | 0  | 0  | 0  | 1  | 2  | 0  | 2  | 1   | 0  | 1  | 0  | 1  | 2  | 2  | 1  | 1  | 3  | 0  |   |
| ENSP00000259711,ENSP000 | ENSG00000137177  | KIF13A       | 38   | 3  | 1  | 0  | 2  | 1  | 0  | 3  | 0  | 1  | 2  | 0    | 0  | 0  | 1  | 1  | 2  | 1  | 2  | 0  | 1   | 0  | 2  | 0  | 1  | 3  | 4  | 2  | 2  | 2  | 0  |   |
| ENSP00000259737,ENSP000 | ENSG00000137207  | YIPF3        | 11   | 0  | 0  | 0  | 1  | 0  | 0  | 1  | 1  | 2  | 0  | 0    | 0  | 0  | 0  | 0  | 1  | 0  | 0  | 1  | 0   | 0  | 0  | 0  | 1  | 0  | 0  | 1  | 1  | 1  | 0  |   |
| ENSP00000259751,ENSP000 | ENSG00000137221  |              | 12   | 1  | 1  | 0  | 0  | 0  | 0  | 0  | 0  | 0  | 0  | 1    | 0  | 0  | 2  | 0  | 0  | 1  | 0  | 1  | 0   | 0  | 0  | 0  | 0  | 1  | 0  | 1  | 2  | 1  | 0  |   |
| ENSP00000259808,ENSP000 | ENSG00000137275  | RIPK1        | 49   | 0  | 0  | 1  | 3  | 1  | 3  | 3  | 0  | 1  | 0  | 0    | 1  | 1  | 1  | 0  | 2  | 3  | 2  | 3  | 2   | 3  | 1  | 0  | 0  | 3  | 3  | 3  | 3  | 1  | 5  |   |
| ENSP00000259818,ENSP000 | ENSG00000137285  | TUBB2B       | 1272 | 59 | 64 | 43 | 34 | 60 | 42 | 37 | 8  | 25 | 49 | 16   | 28 | 39 | 43 | 33 | 49 | 67 | 40 | 39 | 86  | 33 | 24 | 22 | 19 | 43 | 56 | 46 | 69 | 44 | 45 |   |
| ENSP00000259873,ENSP000 | ENSG00000203624  | MRPS18B      | 68   | 3  | 3  | 2  | 1  | 3  | 2  | 2  | 2  | 2  | 3  | 1    | 1  | 0  | 1  | 1  | 3  | 2  | 2  | 1  | 3   | 3  | 5  | 1  | 3  | 5  | 1  | 1  | 6  | 2  | 3  |   |
| ENSP00000259875,ENSP000 | ENSG00000201552  |              | 26   | 1  | 1  | 1  | 1  | 1  | 1  | 1  | 0  | 1  | 0  | 1    | 0  | 0  | 1  | 1  | 2  | 1  | 0  | 1  | 2   | 1  | 2  | 2  | 1  | 0  | 1  | 2  | 0  | 0  | 0  |   |
| ENSP00000259895,ENSP000 | ENSG000002021974 |              | 30   | 1  | 2  | 1  | 2  | 0  | 0  | 1  | 1  | 1  | 2  | 0    | 1  | 0  | 1  | 0  | 0  | 0  | 0  | 1  | 1   | 2  | 1  | 2  | 1  | 2  | 1  | 0  | 4  | 2  | 1  |   |
| ENSP00000259925,ENSP000 | ENSG00000183311  |              | 1678 | 65 | 70 | 50 | 42 | 90 | 53 | 51 | 17 | 36 | 55 | 18   | 30 | 54 | 58 | 47 | 65 | 81 | 51 | 61 | 114 | 51 | 46 | 31 | 26 | 66 | 78 | 59 | 92 | 60 | 61 |   |
| ENSP00000260045,ENSP000 | ENSG00000137492  | PRKRIR       | 10   | 1  | 0  | 0  | 1  | 0  | 0  | 1  | 0  | 0  | 0  | 0    | 0  | 0  | 0  | 0  | 0  | 0  | 1  | 1  | 0   | 0  | 1  | 0  | 1  | 0  | 0  | 0  | 0  | 1  | 0  | 1 |
| ENSP00000260051_S3671   | ENSG00000137497  | NUMA1        | 367  | 18 | 7  | 15 | 12 | 10 | 7  | 13 | 13 | 12 | 26 | 12</ |    |    |    |    |    |    |    |    |     |    |    |    |    |    |    |    |    |    |    |   |

|                                           |          |      |    |    |    |    |    |    |    |    |    |    |    |    |    |    |    |    |    |    |     |    |    |    |    |    |    |    |    |    |    |    |   |
|-------------------------------------------|----------|------|----|----|----|----|----|----|----|----|----|----|----|----|----|----|----|----|----|----|-----|----|----|----|----|----|----|----|----|----|----|----|---|
| ENSP00000261182,ENSP0000026118109         | NAP1L1   | 331  | 17 | 8  | 17 | 6  | 10 | 8  | 6  | 7  | 9  | 13 | 3  | 7  | 12 | 8  | 17 | 12 | 8  | 13 | 7   | 20 | 10 | 10 | 4  | 10 | 15 | 12 | 8  | 20 | 14 | 20 |   |
| ENSP00000261183,ENSP0000026118109         | OSBPL8   | 98   | 6  | 1  | 0  | 1  | 1  | 2  | 2  | 0  | 2  | 6  | 3  | 5  | 1  | 0  | 2  | 5  | 3  | 10 | 1   | 2  | 4  | 6  | 4  | 6  | 3  | 3  | 4  | 6  | 2  | 7  |   |
| ENSP00000261191,ENSP0000026119109         | C12orf11 | 25   | 0  | 1  | 1  | 0  | 0  | 0  | 2  | 0  | 1  | 1  | 0  | 1  | 1  | 0  | 1  | 3  | 0  | 2  | 1   | 1  | 1  | 3  | 3  | 0  | 0  | 0  | 0  | 1  | 0  | 1  |   |
| ENSP00000261192,ENSP0000026119209         | BCAT1    | 14   | 6  | 1  | 7  | 0  | 0  | 0  | 0  | 0  | 0  | 0  | 0  | 0  | 0  | 0  | 0  | 0  | 0  | 0  | 0   | 0  | 0  | 0  | 0  | 0  | 0  | 0  | 0  | 0  | 0  |    |   |
| ENSP00000261203,ENSP0000026120309         | UN7A     | 14   | 2  | 3  | 1  | 0  | 0  | 0  | 0  | 0  | 0  | 1  | 1  | 1  | 1  | 0  | 0  | 0  | 0  | 0  | 1   | 0  | 0  | 0  | 0  | 0  | 0  | 0  | 1  | 1  | 0  | 1  |   |
| ENSP00000261207,ENSP0000026120709         | PPP1R12A | 229  | 13 | 6  | 6  | 8  | 4  | 3  | 11 | 4  | 4  | 6  | 3  | 3  | 8  | 7  | 9  | 5  | 11 | 5  | 13  | 14 | 9  | 19 | 8  | 9  | 5  | 3  | 4  | 12 | 9  | 8  |   |
| ENSP00000261210,ENSP0000026121009         | TMPO     | 584  | 17 | 18 | 15 | 18 | 28 | 14 | 18 | 15 | 10 | 24 | 12 | 19 | 21 | 13 | 22 | 21 | 15 | 23 | 29  | 23 | 26 | 27 | 25 | 17 | 28 | 14 | 26 | 19 | 17 |    |   |
| ENSP00000261211,ENSP0000026121109         | PTCK2    | 11   | 0  | 0  | 0  | 0  | 0  | 0  | 0  | 0  | 1  | 2  | 0  | 0  | 0  | 0  | 1  | 0  | 0  | 0  | 0   | 1  | 1  | 0  | 0  | 0  | 0  | 0  | 2  | 2  | 1  |    |   |
| ENSP00000261220,ENSP0000026122009         | METAF2   | 96   | 4  | 8  | 6  | 5  | 4  | 1  | 1  | 3  | 6  | 1  | 3  | 0  | 1  | 7  | 7  | 2  | 6  | 6  | 1   | 1  | 1  | 2  | 2  | 4  | 4  | 4  | 3  | 1  | 2  | 0  |   |
| ENSP00000261245,ENSP0000026124509         | MNAT1    | 27   | 1  | 3  | 0  | 0  | 0  | 0  | 1  | 1  | 0  | 1  | 1  | 0  | 1  | 0  | 0  | 0  | 1  | 1  | 1   | 1  | 2  | 3  | 0  | 0  | 1  | 0  | 4  | 3  | 0  |    |   |
| ENSP00000261249,ENSP0000026124909         | TRMT5    | 46   | 1  | 0  | 0  | 0  | 0  | 1  | 0  | 0  | 0  | 0  | 2  | 1  | 1  | 1  | 0  | 2  | 2  | 2  | 2   | 2  | 1  | 6  | 4  | 0  | 5  | 1  | 1  | 5  | 4  | 2  |   |
| ENSP00000261253,ENSP0000026125309         | JARID1A  | 38   | 2  | 0  | 0  | 2  | 3  | 0  | 2  | 2  | 1  | 1  | 0  | 1  | 3  | 0  | 0  | 1  | 0  | 0  | 7   | 3  | 2  | 2  | 2  | 0  | 1  | 0  | 0  | 0  | 3  | 0  |   |
| ENSP00000261263,ENSP0000026126309         | RAB21    | 185  | 10 | 6  | 7  | 4  | 3  | 5  | 6  | 3  | 5  | 6  | 1  | 4  | 5  | 5  | 7  | 4  | 5  | 4  | 5   | 7  | 4  | 12 | 8  | 10 | 9  | 10 | 5  | 8  | 9  | 8  |   |
| ENSP00000261267,ENSP0000026126709         | LYZ      | 15   | 0  | 0  | 0  | 1  | 1  | 0  | 8  | 2  | 2  | 0  | 0  | 0  | 0  | 0  | 0  | 0  | 0  | 0  | 0   | 0  | 0  | 0  | 0  | 0  | 1  | 0  | 0  | 0  | 0  | 0  |   |
| ENSP00000261303,ENSP0000026130309         | PSMC1    | 420  | 22 | 9  | 16 | 6  | 7  | 10 | 7  | 5  | 10 | 23 | 7  | 11 | 13 | 6  | 17 | 16 | 11 | 17 | 8   | 17 | 18 | 18 | 5  | 9  | 25 | 22 | 12 | 25 | 27 | 21 |   |
| ENSP00000261308,ENSP0000026130809         | PPWD1    | 54   | 2  | 2  | 1  | 3  | 3  | 2  | 2  | 1  | 1  | 3  | 0  | 1  | 3  | 1  | 1  | 4  | 2  | 1  | 2   | 3  | 2  | 1  | 2  | 0  | 3  | 2  | 0  | 2  | 1  | 3  |   |
| ENSP00000261313,ENSP0000026131309         | PEBP1    | 374  | 12 | 8  | 7  | 15 | 28 | 13 | 7  | 7  | 11 | 10 | 3  | 2  | 9  | 8  | 8  | 14 | 16 | 15 | 15  | 17 | 11 | 14 | 7  | 6  | 30 | 20 | 16 | 16 | 13 | 13 |   |
| ENSP00000261359,ENSP0000026135909         | BIRC6    | 97   | 3  | 0  | 2  | 1  | 0  | 0  | 3  | 1  | 2  | 4  | 0  | 3  | 4  | 2  | 7  | 3  | 2  | 3  | 4   | 3  | 5  | 0  | 1  | 2  | 5  | 11 | 6  | 10 | 3  | 7  |   |
| ENSP00000261366,ENSP0000026136609         | LUMN1    | 1195 | 40 | 30 | 32 | 40 | 54 | 41 | 38 | 33 | 39 | 48 | 36 | 40 | 31 | 38 | 35 | 26 | 38 | 34 | 51  | 51 | 39 | 66 | 52 | 48 | 46 | 45 | 34 | 28 | 33 | 29 |   |
| ENSP00000261396,ENSP0000026139609         | NUP133   | 172  | 4  | 4  | 7  | 3  | 4  | 3  | 5  | 4  | 6  | 9  | 1  | 5  | 4  | 3  | 5  | 6  | 6  | 9  | 3   | 6  | 8  | 9  | 10 | 7  | 7  | 8  | 6  | 8  | 6  | 6  |   |
| ENSP00000261401,ENSP0000026140109         | CORO1C   | 128  | 4  | 5  | 4  | 3  | 3  | 2  | 3  | 4  | 3  | 4  | 3  | 3  | 2  | 8  | 3  | 0  | 0  | 2  | 5   | 7  | 5  | 10 | 6  | 1  | 6  | 1  | 2  | 11 | 7  | 11 |   |
| ENSP00000261406,ENSP0000026140609         | EMG1     | 71   | 4  | 3  | 3  | 0  | 1  | 2  | 1  | 1  | 1  | 6  | 1  | 2  | 0  | 1  | 2  | 2  | 1  | 4  | 1   | 2  | 5  | 3  | 1  | 3  | 3  | 3  | 3  | 6  | 2  | 4  |   |
| ENSP00000261407,ENSP0000026140709         | LCAT3    | 23   | 5  | 0  | 3  | 1  | 0  | 1  | 1  | 0  | 1  | 2  | 0  | 0  | 2  | 0  | 0  | 1  | 0  | 0  | 1   | 0  | 1  | 1  | 0  | 0  | 1  | 0  | 1  | 0  | 0  | 1  |   |
| ENSP00000261413,ENSP0000026141309         | MRPS27   | 212  | 14 | 10 | 4  | 4  | 5  | 9  | 9  | 6  | 6  | 6  | 7  | 4  | 4  | 3  | 2  | 6  | 3  | 8  | 5   | 8  | 5  | 6  | 17 | 9  | 6  | 12 | 8  | 5  | 6  | 11 | 8 |
| ENSP00000261413,rs32091:ENSP0000026141309 | MRPS27   | 174  | 10 | 6  | 3  | 5  | 9  | 8  | 5  | 4  | 5  | 7  | 3  | 4  | 4  | 0  | 6  | 2  | 6  | 4  | 6   | 6  | 6  | 15 | 6  | 5  | 10 | 5  | 4  | 5  | 8  | 7  |   |
| ENSP00000261416,ENSP0000026141609         | HEXB     | 187  | 7  | 3  | 6  | 6  | 13 | 8  | 6  | 7  | 5  | 7  | 3  | 7  | 2  | 4  | 7  | 5  | 6  | 6  | 7   | 6  | 6  | 9  | 7  | 5  | 12 | 11 | 4  | 5  | 4  | 3  |   |
| ENSP00000261416,rs82087:ENSP0000026141609 | HEXB     | 183  | 7  | 3  | 7  | 6  | 12 | 7  | 7  | 7  | 6  | 7  | 3  | 7  | 2  | 4  | 7  | 5  | 6  | 5  | 7   | 5  | 8  | 6  | 4  | 12 | 11 | 5  | 5  | 4  | 3  |    |   |
| ENSP00000261424,ENSP0000026142409         | RFC1     | 138  | 5  | 4  | 1  | 4  | 6  | 2  | 4  | 4  | 2  | 5  | 9  | 1  | 6  | 11 | 5  | 3  | 4  | 2  | 2   | 10 | 3  | 7  | 6  | 3  | 7  | 3  | 1  | 4  | 10 | 4  |   |
| ENSP00000261427,ENSP0000026142709         | UBE2K    | 155  | 9  | 5  | 4  | 7  | 7  | 4  | 5  | 3  | 5  | 6  | 0  | 2  | 8  | 2  | 4  | 7  | 7  | 4  | 9   | 10 | 2  | 6  | 1  | 2  | 7  | 8  | 4  | 9  | 4  | 4  |   |
| ENSP00000261439,ENSP0000026143909         | TBC1D1   | 12   | 0  | 0  | 0  | 1  | 1  | 0  | 1  | 0  | 0  | 0  | 0  | 0  | 0  | 1  | 0  | 0  | 2  | 0  | 1   | 1  | 1  | 0  | 1  | 0  | 0  | 0  | 0  | 0  | 1  | 1  |   |
| ENSP00000261441,ENSP0000026144109         | RSB1     | 31   | 0  | 0  | 0  | 1  | 1  | 0  | 0  | 1  | 1  | 0  | 1  | 1  | 0  | 0  | 1  | 0  | 2  | 0  | 6   | 0  | 1  | 2  | 2  | 0  | 2  | 2  | 0  | 3  | 1  | 3  |   |
| ENSP00000261443,ENSP0000026144309         | CSDE1    | 282  | 13 | 11 | 8  | 9  | 6  | 6  | 9  | 9  | 9  | 7  | 3  | 3  | 9  | 13 | 15 | 7  | 16 | 13 | 16  | 13 | 10 | 14 | 7  | 5  | 11 | 6  | 5  | 12 | 9  | 8  |   |
| ENSP00000261461,ENSP0000026146109         | PP2R25A  | 48   | 3  | 2  | 2  | 2  | 4  | 4  | 1  | 0  | 3  | 0  | 1  | 0  | 0  | 0  | 2  | 2  | 0  | 1  | 2   | 2  | 1  | 0  | 1  | 0  | 4  | 2  | 5  | 1  | 1  | 2  |   |
| ENSP00000261479,ENSP0000026147909         | PSMA6    | 414  | 18 | 6  | 13 | 10 | 9  | 17 | 18 | 1  | 12 | 13 | 2  | 10 | 16 | 4  | 12 | 19 | 11 | 15 | 26  | 11 | 21 | 16 | 5  | 17 | 30 | 18 | 12 | 27 | 7  | 18 |   |
| ENSP00000261482,ENSP0000026148209         | REEP5    | 37   | 1  | 3  | 1  | 1  | 0  | 2  | 0  | 0  | 1  | 4  | 0  | 1  | 2  | 2  | 3  | 0  | 0  | 3  | 3   | 0  | 1  | 1  | 0  | 4  | 0  | 0  | 0  | 0  | 2  | 2  |   |
| ENSP00000261483,ENSP0000026148309         | MAN2A1   | 112  | 8  | 3  | 3  | 9  | 11 | 6  | 10 | 5  | 1  | 2  | 0  | 3  | 2  | 0  | 1  | 5  | 3  | 1  | 7   | 6  | 1  | 3  | 1  | 6  | 6  | 5  | 1  | 1  | 1  | 1  |   |
| ENSP00000261489,ENSP0000026148909         | TSC22D1  | 40   | 3  | 2  | 2  | 3  | 2  | 3  | 2  | 0  | 2  | 1  | 0  | 2  | 2  | 0  | 1  | 1  | 3  | 3  | 1   | 0  | 3  | 0  | 0  | 1  | 0  | 1  | 0  | 1  | 0  | 1  |   |
| ENSP00000261497_K35,ENSP0000026149709     | USP22    | 15   | 3  | 1  | 0  | 0  | 0  | 0  | 2  | 0  | 0  | 0  | 0  | 0  | 0  | 1  | 0  | 0  | 1  | 0  | 1   | 1  | 0  | 0  | 0  | 0  | 0  | 0  | 1  | 1  | 1  | 1  |   |
| ENSP00000261503,ENSP0000026150309         | CYTS8    | 40   | 2  | 7  | 3  | 2  | 0  | 0  | 0  | 0  | 0  | 3  | 1  | 1  | 2  | 0  | 0  | 4  | 1  | 1  | 3   | 0  | 1  | 2  | 2  | 2  | 0  | 1  | 0  | 1  | 0  | 1  |   |
| ENSP00000261507,ENSP0000026150709         | SC4MOL   | 20   | 2  | 0  | 1  | 1  | 1  | 1  | 1  | 0  | 0  | 0  | 0  | 0  | 1  | 1  | 0  | 2  | 1  | 0  | 1   | 1  | 1  | 2  | 0  | 0  | 1  | 0  | 1  | 1  | 0  | 0  |   |
| ENSP00000261509,ENSP0000026150909         | PALLD    | 23   | 1  | 1  | 0  | 0  | 0  | 0  | 1  | 0  | 0  | 0  | 0  | 0  | 0  | 1  | 0  | 1  | 2  | 2  | 1   | 0  | 1  | 0  | 4  | 2  | 1  | 1  | 2  | 0  | 0  | 1  |   |
| ENSP00000261511,ENSP0000026151109         | C4orf27  | 30   | 0  | 1  | 0  | 0  | 0  | 1  | 1  | 0  | 0  | 0  | 0  | 0  | 0  | 1  | 3  | 0  | 2  | 2  | 3   | 0  | 2  | 0  | 0  | 0  | 2  | 0  | 2  | 3  | 2  | 5  |   |
| ENSP00000261531,ENSP0000026153109         | SNW1     | 227  | 12 | 7  | 9  | 8  | 3  | 8  | 5  | 4  | 7  | 6  | 2  | 9  | 9  | 3  | 9  | 6  | 8  | 9  | 11  | 8  | 6  | 9  | 10 | 9  | 9  | 6  | 10 | 10 | 9  | 10 |   |
| ENSP00000261535,ENSP0000026153509         | ROCK1    | 107  | 7  | 3  | 12 | 2  | 3  | 4  | 5  | 2  | 2  | 0  | 2  | 3  | 4  | 4  | 0  | 5  | 4  | 10 | 7   | 6  | 0  | 0  | 1  | 6  | 3  | 1  | 4  | 3  | 0  |    |   |
| ENSP00000261574,ENSP0000026157409         | IPO5     | 763  | 49 | 28 | 33 | 27 | 33 | 32 | 18 | 8  | 21 | 25 | 5  | 15 | 29 | 27 | 28 | 22 | 24 | 29 | 31  | 33 | 32 | 21 | 10 | 17 | 31 | 25 | 18 | 38 | 26 | 28 |   |
| ENSP00000261590,ENSP0000026159009         | DSG2     | 322  | 9  | 4  | 7  | 7  | 11 | 4  | 5  | 8  | 3  | 1  | 0  | 2  | 16 | 7  | 16 | 13 | 15 | 13 | 17  | 11 | 15 | 22 | 16 | 18 | 34 | 19 | 20 | 2  | 3  | 4  |   |
| ENSP00000261590,rs22787:ENSP0000026159009 | DSG2     | 324  | 9  | 4  | 7  | 7  | 11 | 4  | 5  | 8  | 2  | 1  | 1  | 2  | 18 | 7  | 15 | 15 | 15 | 17 | 14  | 16 | 23 | 17 | 17 | 30 | 17 | 18 | 2  | 3  | 4  |    |   |
| ENSP00000261597,ENSP0000026159709         | NDC80    | 38   | 2  | 1  | 1  | 5  | 1  | 0  | 4  | 1  | 1  | 0  | 0  | 0  | 2  | 3  | 0  | 0  | 0  | 2  | 3   | 5  | 2  | 0  | 0  | 0  | 0  | 0  | 0  | 3  | 1  | 1  |   |
| ENSP00000261598,ENSP0000026159809         | SMCHD1   | 112  | 5  | 2  | 3  | 3  | 1  | 1  | 3  | 4  | 1  | 5  | 2  | 4  | 3  | 4  | 7  | 3  | 5  | 3  | 6   | 9  | 3  | 6  | 4  | 3  | 6  | 3  | 2  | 3  | 5  | 3  |   |
| ENSP00000261600,ENSP0000026160009         | THO1     | 101  | 4  | 2  | 1  | 3  | 3  | 1  | 4  | 3  | 4  | 5  | 3  | 4  | 2  | 3  | 5  | 2  | 2  | 0  | 5   | 6  | 2  | 4  | 7  | 7  | 4  | 4  | 2  | 2  | 4  | 3  |   |
| ENSP00000261601,ENSP0000026160109         | USP14    | 424  | 21 | 10 | 14 | 5  | 4  | 6  | 15 | 8  | 15 | 11 | 3  | 6  | 7  | 13 | 20 | 9  | 11 | 11 | 17  | 19 | 21 | 18 | 10 | 14 | 32 | 22 | 17 | 28 | 15 | 22 |   |
| ENSP00000261609,ENSP0000026160909         | HERC2    | 49   | 1  | 0  | 1  | 3  | 0  | 1  | 4  | 0  | 2  | 1  | 0  | 1  | 3  | 2  | 1  | 1  | 3  | 3  | 6</ |    |    |    |    |    |    |    |    |    |    |    |   |

|                          |                  |             |      |    |    |    |    |    |    |     |     |     |    |    |    |    |    |    |    |    |    |    |    |    |    |    |    |    |    |    |    |    |    |   |   |
|--------------------------|------------------|-------------|------|----|----|----|----|----|----|-----|-----|-----|----|----|----|----|----|----|----|----|----|----|----|----|----|----|----|----|----|----|----|----|----|---|---|
| ENSP00000261965,ENSP000  | ENSG00000126216  | TUBGCP3     | 90   | 1  | 5  | 1  | 7  | 6  | 2  | 5   | 4   | 3   | 0  | 1  | 2  | 0  | 2  | 4  | 3  | 3  | 3  | 2  | 4  | 3  | 1  | 1  | 2  | 6  | 6  | 2  | 5  | 3  | 3  |   |   |
| ENSP00000261973,ENSP000  | ENSG00000119707  | RBM25       | 279  | 14 | 12 | 3  | 3  | 7  | 6  | 6   | 8   | 3   | 22 | 13 | 8  | 4  | 8  | 7  | 6  | 9  | 9  | 6  | 16 | 11 | 14 | 14 | 9  | 13 | 9  | 1  | 22 | 7  | 9  |   |   |
| ENSP00000261991          | ENSG00000100784  | RP5GKA5     | 17   | 0  | 0  | 1  | 0  | 0  | 0  | 0   | 0   | 0   | 0  | 0  | 0  | 0  | 0  | 1  | 1  | 1  | 0  | 0  | 0  | 4  | 1  | 1  | 3  | 1  | 1  | 0  | 0  | 0  |    |   |   |
| ENSP00000262004,ENSP000  | ENSG00000100600  | LGMM        | 27   | 3  | 0  | 2  | 2  | 0  | 2  | 1   | 0   | 1   | 2  | 0  | 1  | 0  | 2  | 1  | 0  | 1  | 0  | 0  | 1  | 2  | 0  | 3  | 1  | 0  | 1  | 0  | 0  | 0  |    |   |   |
| ENSP00000262027,ENSP000  | ENSG00000166986  | MARS        | 414  | 22 | 14 | 15 | 18 | 14 | 17 | 15  | 7   | 13  | 11 | 5  | 6  | 15 | 9  | 16 | 18 | 20 | 17 | 16 | 14 | 13 | 13 | 6  | 11 | 19 | 12 | 10 | 20 | 14 | 14 |   |   |
| ENSP00000262030,ENSP000  | ENSG00000110955  | ATP5B       | 1710 | 64 | 33 | 59 | 32 | 69 | 54 | 46  | 13  | 46  | 65 | 30 | 42 | 34 | 40 | 43 | 61 | 70 | 61 | 61 | 71 | 55 | 82 | 55 | 65 | 79 | 93 | 69 | 96 | 63 | 59 |   |   |
| ENSP00000262031          | ENSG00000076067  | BTMS2P,RBM1 | 34   | 1  | 2  | 0  | 0  | 0  | 0  | 1   | 2   | 1   | 1  | 1  | 0  | 2  | 5  | 2  | 1  | 1  | 0  | 1  | 2  | 1  | 1  | 1  | 2  | 0  | 0  | 0  | 2  | 3  | 1  |   |   |
| ENSP00000262033          | ENSG00000110958  | PTEG53      | 249  | 14 | 4  | 7  | 4  | 6  | 9  | 8   | 3   | 9   | 10 | 3  | 3  | 9  | 2  | 9  | 10 | 6  | 13 | 11 | 10 | 11 | 15 | 5  | 5  | 16 | 9  | 10 | 13 | 7  | 8  |   |   |
| ENSP00000262039,ENSP000  | ENSG00000078142  | PIK3C3      | 23   | 0  | 0  | 0  | 1  | 1  | 0  | 3   | 1   | 2   | 0  | 0  | 0  | 1  | 0  | 1  | 2  | 0  | 0  | 3  | 2  | 0  | 0  | 0  | 0  | 1  | 1  | 0  | 0  | 1  | 2  |   |   |
| ENSP00000262043,ENSP000  | ENSG00000118482  | PHF3        | 103  | 2  | 4  | 2  | 10 | 4  | 6  | 1   | 2   | 1   | 2  | 0  | 1  | 2  | 0  | 3  | 3  | 0  | 2  | 2  | 12 | 6  | 4  | 8  | 3  | 4  | 3  | 0  | 2  | 9  | 2  |   |   |
| ENSP00000262056          | ENSG00000063046  | E1F4B       | 235  | 9  | 6  | 10 | 9  | 7  | 7  | 5   | 9   | 5   | 3  | 2  | 4  | 5  | 10 | 5  | 5  | 9  | 9  | 16 | 12 | 7  | 11 | 6  | 7  | 13 | 8  | 9  | 10 | 8  | 9  |   |   |
| ENSP00000262056_G428E    | ENSG00000063046  | E1F4B       | 235  | 9  | 6  | 10 | 9  | 7  | 7  | 5   | 9   | 5   | 3  | 2  | 3  | 5  | 10 | 5  | 5  | 9  | 9  | 16 | 12 | 8  | 11 | 6  | 7  | 13 | 8  | 9  | 10 | 8  | 9  |   |   |
| ENSP00000262059,ENSP000  | ENSG00000012822  | CALCOCO1    | 13   | 0  | 0  | 0  | 0  | 1  | 0  | 2   | 1   | 0   | 2  | 0  | 0  | 0  | 0  | 0  | 0  | 0  | 0  | 1  | 1  | 1  | 0  | 1  | 2  | 0  | 0  | 0  | 1  | 0  | 0  |   |   |
| ENSP00000262061          | ENSG00000111481  | COP21       | 162  | 7  | 5  | 6  | 5  | 9  | 8  | 4   | 5   | 5   | 6  | 1  | 2  | 5  | 2  | 5  | 6  | 4  | 7  | 4  | 7  | 5  | 8  | 3  | 5  | 6  | 8  | 5  | 8  | 6  | 5  |   |   |
| ENSP00000262077,ENSP000  | ENSG00000124789  | NUP153      | 131  | 4  | 5  | 1  | 6  | 2  | 2  | 1   | 2   | 2   | 6  | 4  | 6  | 5  | 1  | 6  | 5  | 2  | 5  | 5  | 2  | 8  | 7  | 5  | 6  | 7  | 1  | 5  | 10 | 6  | 6  |   |   |
| ENSP00000262093,ENSP000  | ENSG00000066926  | FECH        | 72   | 3  | 0  | 1  | 1  | 0  | 0  | 0   | 0   | 0   | 0  | 0  | 2  | 2  | 0  | 2  | 4  | 8  | 3  | 7  | 4  | 3  | 5  | 3  | 4  | 4  | 4  | 3  | 3  | 3  | 3  |   |   |
| ENSP00000262093_P275T,EI | ENSG00000066926  | FECH        | 58   | 3  | 0  | 0  | 0  | 0  | 0  | 0   | 0   | 0   | 0  | 0  | 0  | 2  | 2  | 0  | 2  | 3  | 6  | 2  | 5  | 3  | 2  | 4  | 2  | 3  | 4  | 4  | 2  | 4  | 2  | 3 |   |
| ENSP00000262094          | ENSG00000041353  | RAB27B      | 43   | 0  | 0  | 0  | 1  | 3  | 1  | 1   | 2   | 2   | 0  | 0  | 0  | 0  | 3  | 1  | 3  | 0  | 0  | 0  | 2  | 0  | 1  | 5  | 3  | 2  | 7  | 4  | 2  | 0  | 0  | 0 |   |
| ENSP00000262097,ENSP000  | ENSG00000104763  | ASAH1       | 83   | 3  | 2  | 2  | 2  | 3  | 4  | 1   | 1   | 2   | 2  | 3  | 2  | 1  | 2  | 3  | 3  | 4  | 3  | 1  | 2  | 3  | 3  | 2  | 3  | 2  | 5  | 6  | 5  | 6  | 2  | 2 |   |
| ENSP00000262105_rs76267  | ENSG00000104738  | MC4M        | 446  | 19 | 13 | 19 | 15 | 17 | 13 | 16  | 7   | 20  | 37 | 6  | 8  | 12 | 9  | 16 | 13 | 12 | 15 | 13 | 16 | 16 | 16 | 5  | 4  | 21 | 17 | 19 | 21 | 12 | 19 |   |   |
| ENSP00000262109,ENSP000  | ENSG00000104714  | ERIC11      | 11   | 0  | 1  | 0  | 0  | 0  | 0  | 1   | 1   | 2   | 0  | 0  | 0  | 1  | 0  | 0  | 0  | 1  | 0  | 0  | 2  | 0  | 1  | 0  | 1  | 0  | 0  | 0  | 0  | 0  | 0  |   |   |
| ENSP00000262112,ENSP000  | ENSG000000085415 | ARHGEF10    | 22   | 2  | 1  | 0  | 0  | 0  | 1  | 0   | 1   | 0   | 0  | 0  | 1  | 0  | 0  | 0  | 0  | 4  | 0  | 2  | 1  | 1  | 0  | 2  | 1  | 2  | 0  | 1  | 0  | 0  | 0  | 2 |   |
| ENSP00000262124,ENSP000  | ENSG000000085415 | SEH1L       | 43   | 2  | 0  | 2  | 1  | 1  | 2  | 3   | 0   | 2   | 2  | 0  | 1  | 1  | 0  | 2  | 1  | 2  | 3  | 4  | 0  | 1  | 5  | 0  | 2  | 1  | 2  | 1  | 1  | 0  | 1  | 0 |   |
| ENSP00000262133,ENSP000  | ENSG00000103479  | RLB2        | 10   | 0  | 0  | 1  | 0  | 0  | 0  | 1   | 0   | 0   | 0  | 0  | 0  | 0  | 0  | 0  | 1  | 1  | 0  | 1  | 1  | 2  | 0  | 1  | 0  | 0  | 0  | 0  | 0  | 0  | 1  |   |   |
| ENSP00000262134,ENSP000  | ENSG000000887253 | LPCLAT2     | 36   | 1  | 0  | 0  | 0  | 0  | 0  | 5   | 4   | 5   | 7  | 0  | 1  | 2  | 0  | 0  | 0  | 0  | 1  | 2  | 2  | 0  | 3  | 0  | 1  | 0  | 0  | 0  | 0  | 1  | 0  | 1 |   |
| ENSP00000262146,ENSP000  | ENSG00000066855  | MTFR1       | 12   | 0  | 0  | 0  | 0  | 1  | 1  | 0   | 1   | 0   | 1  | 0  | 0  | 0  | 0  | 0  | 0  | 0  | 0  | 0  | 0  | 0  | 0  | 0  | 2  | 0  | 0  | 0  | 2  | 2  | 2  |   |   |
| ENSP00000262161,ENSP000  | ENSG00000078043  | PIA52       | 12   | 0  | 0  | 0  | 0  | 0  | 0  | 2   | 0   | 0   | 0  | 0  | 0  | 0  | 1  | 0  | 1  | 0  | 1  | 2  | 0  | 0  | 0  | 0  | 1  | 0  | 0  | 0  | 2  | 0  | 1  |   |   |
| ENSP00000262173,ENSP000  | ENSG00000101654  | RNMT        | 178  | 8  | 4  | 5  | 2  | 4  | 5  | 8   | 6   | 4   | 6  | 10 | 3  | 2  | 6  | 7  | 9  | 9  | 7  | 6  | 7  | 3  | 7  | 9  | 4  | 6  | 5  | 3  | 10 | 8  | 5  |   |   |
| ENSP00000262177          | ENSG00000105993  | DNAJB6      | 134  | 13 | 9  | 6  | 2  | 2  | 1  | 4   | 2   | 2   | 6  | 4  | 3  | 5  | 4  | 2  | 2  | 5  | 4  | 6  | 4  | 7  | 3  | 4  | 5  | 2  | 5  | 4  | 3  | 5  | 7  | 9 |   |
| ENSP00000262187          | ENSG00000106615  | RHEB        | 42   | 3  | 3  | 1  | 2  | 1  | 1  | 1   | 1   | 2   | 1  | 0  | 1  | 1  | 1  | 1  | 2  | 2  | 1  | 3  | 1  | 1  | 2  | 1  | 1  | 2  | 1  | 1  | 1  | 1  | 2  | 1 |   |
| ENSP00000262188,ENSP000  | ENSG00000080214  | SMARCD3     | 18   | 0  | 0  | 0  | 0  | 0  | 1  | 0   | 0   | 1   | 2  | 0  | 1  | 0  | 0  | 1  | 2  | 1  | 1  | 1  | 0  | 1  | 2  | 1  | 0  | 1  | 0  | 2  | 0  | 0  | 0  | 0 |   |
| ENSP00000262193,ENSP000  | ENSG00000008018  | PSM1        | 221  | 7  | 4  | 6  | 8  | 8  | 9  | 7   | 3   | 6   | 6  | 2  | 3  | 8  | 5  | 7  | 9  | 9  | 8  | 8  | 6  | 12 | 12 | 5  | 6  | 9  | 12 | 12 | 12 | 5  | 7  |   |   |
| ENSP00000262210,ENSP000  | ENSG00000104218  | CSPB1       | 16   | 0  | 0  | 0  | 1  | 1  | 0  | 1   | 0   | 1   | 0  | 0  | 0  | 1  | 0  | 0  | 2  | 1  | 0  | 1  | 0  | 0  | 1  | 0  | 0  | 0  | 1  | 1  | 0  | 2  | 0  | 2 |   |
| ENSP00000262213          | ENSG00000067167  | TRAM1       | 23   | 0  | 1  | 0  | 0  | 0  | 0  | 2   | 2   | 1   | 0  | 0  | 0  | 0  | 1  | 5  | 0  | 0  | 2  | 0  | 2  | 0  | 0  | 0  | 1  | 2  | 1  | 0  | 2  | 0  | 0  | 1 | 0 |
| ENSP00000262215,ENSP000  | ENSG00000066777  | ARFGEF1     | 86   | 5  | 3  | 0  | 0  | 7  | 6  | 4   | 11  | 6   | 3  | 0  | 1  | 0  | 5  | 2  | 0  | 3  | 2  | 0  | 6  | 3  | 2  | 1  | 1  | 0  | 2  | 9  | 0  | 1  | 2  | 1 | 0 |
| ENSP00000262219          | ENSG00000104537  | ANXA13      | 143  | 2  | 2  | 2  | 3  | 6  | 5  | 26  | 41  | 28  | 0  | 0  | 1  | 0  | 2  | 1  | 0  | 3  | 0  | 2  | 2  | 1  | 2  | 2  | 1  | 3  | 3  | 2  | 1  | 1  | 1  | 1 |   |
| ENSP00000262225          | ENSG00000086598  | TMED2       | 148  | 8  | 3  | 3  | 6  | 8  | 9  | 8   | 0   | 7   | 8  | 1  | 3  | 4  | 2  | 7  | 8  | 3  | 8  | 3  | 3  | 5  | 6  | 2  | 10 | 7  | 2  | 8  | 1  | 1  | 4  | 4 |   |
| ENSP00000262238          | ENSG00000100811  | YY1         | 13   | 0  | 1  | 0  | 0  | 0  | 0  | 0   | 2   | 0   | 1  | 0  | 1  | 0  | 1  | 0  | 1  | 0  | 0  | 0  | 2  | 0  | 0  | 1  | 0  | 2  | 0  | 0  | 1  | 0  | 0  | 0 |   |
| ENSP00000262241,ENSP000  | ENSG00000089902  | RCOR1       | 151  | 7  | 5  | 3  | 4  | 5  | 5  | 2   | 3   | 3   | 6  | 3  | 8  | 5  | 8  | 5  | 5  | 2  | 8  | 9  | 3  | 5  | 7  | 5  | 5  | 9  | 2  | 6  | 3  | 5  | 5  |   |   |
| ENSP00000262265          | ENSG00000104872  | PH1D1       | 76   | 5  | 2  | 2  | 1  | 2  | 1  | 3   | 1   | 3   | 1  | 3  | 0  | 2  | 5  | 2  | 2  | 2  | 4  | 5  | 3  | 5  | 3  | 5  | 3  | 2  | 4  | 1  | 1  | 3  | 4  | 2 |   |
| ENSP00000262265_rs13394  | ENSG00000104872  | PH1D1       | 78   | 5  | 2  | 2  | 1  | 2  | 1  | 3   | 1   | 3   | 1  | 3  | 2  | 3  | 0  | 2  | 5  | 2  | 2  | 3  | 3  | 5  | 4  | 5  | 3  | 2  | 4  | 1  | 1  | 3  | 4  | 2 |   |
| ENSP00000262266,ENSP000  | ENSG000000662813 | POLD1       | 166  | 8  | 7  | 5  | 7  | 7  | 4  | 10  | 5   | 8   | 7  | 4  | 3  | 5  | 3  | 4  | 7  | 4  | 6  | 7  | 7  | 6  | 9  | 4  | 2  | 3  | 3  | 4  | 3  | 6  | 8  |   |   |
| ENSP00000262269,ENSP000  | ENSG00000105357  | MYH14       | 1484 | 59 | 49 | 39 | 53 | 82 | 63 | 149 | 139 | 138 | 14 | 5  | 3  | 18 | 18 | 17 | 28 | 38 | 22 | 50 | 55 | 40 | 75 | 61 | 47 | 83 | 70 | 41 | 10 | 12 | 6  |   |   |
| ENSP00000262302,ENSP000  | ENSG00000095906  | NUPB2       | 17   | 1  | 2  | 1  | 0  | 0  | 1  | 0   | 0   | 1   | 0  | 1  | 0  | 1  | 0  | 1  | 0  | 1  | 0  | 0  | 0  | 0  | 1  | 0  | 1  | 0  | 2  | 0  | 1  | 0  | 1  | 0 |   |
| ENSP00000262306,ENSP000  | ENSG00000103363  | TCF21       | 111  | 4  | 3  | 2  | 4  | 5  | 2  | 3   | 4   | 3   | 1  | 1  | 2  | 4  | 3  | 2  | 5  | 8  | 5  | 7  | 4  | 5  | 4  | 2  | 2  | 5  | 5  | 2  | 4  | 5  | 5  |   |   |
| ENSP00000262315_rs22944  | ENSG00000112786  | CHTF18      | 35   | 0  | 1  | 0  | 2  | 3  | 1  | 3   | 1   | 1   | 0  | 1  | 1  | 0  | 1  | 1  | 3  | 0  | 4  | 0  | 2  | 1  | 0  | 3  | 1  | 0  | 1  | 1  | 0  | 2  | 1  | 1 |   |
| ENSP00000262319,ENSP000  | ENSG00000100726  | TELO2       | 54   | 5  | 1  | 3  | 1  | 2  | 2  | 0   | 0   | 0   | 0  | 0  | 1  | 2  | 1  | 3  | 2  | 1  | 4  | 2  | 2  | 2  | 4  | 2  | 0  | 0  | 3  | 1  | 0  | 4  | 2  | 6 |   |
| ENSP00000262325,ENSP000  | ENSG00000000677  | AP2B1       | 334  | 22 | 7  | 15 | 10 | 14 | 12 | 9   | 5   | 14  | 8  | 4  | 9  | 14 | 4  | 13 | 15 | 12 | 12 | 12 | 11 | 14 | 13 | 4  | 11 | 18 | 11 | 12 | 15 | 5  | 9  |   |   |
| ENSP00000262348,ENSP000  | ENSG00000116729  | GPR177      | 10   | 0  | 0  | 0  | 1  | 0  | 0  | 2   | 1   | 2   | 0  | 0  | 0  | 0  | 0  | 1  | 1  | 0  | 1  | 0  | 0  | 0  | 0  | 0  | 0  | 0  | 0  | 1  | 0  | 0  | 0  | 0 |   |
| ENSP00000262352          | ENSG00000106688  | SLC1A1      | 14   | 3  | 0  | 2  | 0  | 0  | 0  | 1   | 0   | 3   | 0  | 0  | 0  | 0  | 0  | 0  | 1  | 0  | 0  | 0  | 0  | 0  | 1  | 1  | 0  | 0  | 1  | 0  | 1  | 0  | 0  | 0 |   |
| ENSP00000262367_5718:AG  |                  |             |      |    |    |    |    |    |    |     |     |     |    |    |    |    |    |    |    |    |    |    |    |    |    |    |    |    |    |    |    |    |    |   |   |

|                          |                  |          |     |    |    |    |    |    |    |    |    |    |    |   |    |    |    |    |    |    |    |    |    |    |    |    |    |    |    |    |    |    |    |   |   |   |
|--------------------------|------------------|----------|-----|----|----|----|----|----|----|----|----|----|----|---|----|----|----|----|----|----|----|----|----|----|----|----|----|----|----|----|----|----|----|---|---|---|
| ENSP00000262940,ENSP000  | ENSG00000105808  | RASA4    | 16  | 0  | 0  | 0  | 0  | 0  | 0  | 4  | 2  | 4  | 0  | 0 | 0  | 0  | 1  | 1  | 0  | 0  | 0  | 1  | 1  | 0  | 0  | 1  | 0  | 0  | 1  | 0  | 0  | 1  | 0  | 0 | 0 | 0 |
| ENSP00000262947,ENSP000  | ENSG00000007482  | C19orf10 | 137 | 7  | 3  | 3  | 3  | 3  | 5  | 7  | 5  | 6  | 6  | 1 | 1  | 4  | 2  | 3  | 5  | 7  | 2  | 7  | 3  | 4  | 9  | 4  | 5  | 5  | 7  | 2  | 8  | 4  | 6  |   |   |   |
| ENSP00000262948          | ENSG00000126934  | MAP2K2   | 61  | 4  | 2  | 1  | 0  | 1  | 4  | 1  | 1  | 0  | 1  | 1 | 0  | 1  | 1  | 2  | 3  | 4  | 4  | 5  | 3  | 2  | 1  | 1  | 1  | 4  | 2  | 2  | 3  | 1  | 5  |   |   |   |
| ENSP00000262952,ENSP000  | ENSG000000034063 | UHRF1    | 174 | 6  | 4  | 3  | 6  | 5  | 2  | 4  | 4  | 5  | 6  | 4 | 3  | 6  | 5  | 6  | 6  | 8  | 8  | 8  | 14 | 7  | 5  | 6  | 1  | 4  | 6  | 4  | 4  | 16 | 8  |   |   |   |
| ENSP00000262962          | ENSG00000105248  | CDC94    | 33  | 1  | 1  | 2  | 0  | 0  | 0  | 0  | 0  | 2  | 1  | 1 | 0  | 2  | 2  | 3  | 1  | 0  | 4  | 1  | 0  | 2  | 2  | 2  | 1  | 1  | 1  | 0  | 0  | 2  | 1  |   |   |   |
| ENSP00000262963,ENSP000  | ENSG00000105426  | TPP3     | 17  | 1  | 0  | 1  | 1  | 2  | 1  | 1  | 1  | 0  | 1  | 0 | 0  | 0  | 0  | 2  | 1  | 0  | 0  | 0  | 0  | 1  | 0  | 1  | 0  | 0  | 0  | 1  | 0  | 2  |    |   |   |   |
| ENSP00000262968,ENSP000  | ENSG00000105289  | TIP3     | 31  | 2  | 0  | 2  | 1  | 0  | 2  | 1  | 1  | 0  | 1  | 1 | 0  | 1  | 2  | 1  | 0  | 1  | 0  | 2  | 3  | 2  | 1  | 1  | 2  | 1  | 1  | 1  | 0  | 0  | 1  |   |   |   |
| ENSP00000262975,ENSP000  | ENSG00000101040  | ZMYND8   | 38  | 2  | 2  | 3  | 2  | 2  | 1  | 4  | 2  | 0  | 2  | 0 | 2  | 1  | 0  | 0  | 1  | 4  | 1  | 3  | 1  | 1  | 1  | 0  | 0  | 0  | 1  | 2  | 1  | 0  | 0  |   |   |   |
| ENSP00000262982,ENSP000  | ENSG00000124207  | CSE1L    | 670 | 64 | 24 | 36 | 17 | 14 | 16 | 24 | 13 | 24 | 26 | 6 | 16 | 20 | 6  | 21 | 19 | 24 | 28 | 31 | 21 | 30 | 23 | 8  | 15 | 31 | 18 | 18 | 29 | 25 | 23 |   |   |   |
| ENSP00000262992          | ENSG00000109452  | INPP4B   | 21  | 1  | 0  | 0  | 0  | 2  | 1  | 3  | 0  | 1  | 0  | 0 | 0  | 1  | 0  | 1  | 0  | 0  | 0  | 1  | 1  | 2  | 0  | 1  | 0  | 1  | 4  | 1  | 0  | 0  | 0  |   |   |   |
| ENSP00000263012,ENSP000  | ENSG00000185164  | NOMMO2   | 387 | 18 | 11 | 15 | 10 | 9  | 9  | 13 | 12 | 14 | 19 | 6 | 7  | 11 | 7  | 13 | 14 | 14 | 16 | 16 | 12 | 14 | 16 | 9  | 14 | 16 | 14 | 13 | 17 | 9  | 19 |   |   |   |
| ENSP00000263014,ENSP000  | ENSG00000103222  | ABCC1    | 81  | 2  | 3  | 0  | 5  | 1  | 4  | 4  | 3  | 2  | 3  | 1 | 2  | 1  | 1  | 2  | 6  | 8  | 1  | 4  | 3  | 2  | 1  | 3  | 0  | 2  | 4  | 1  | 4  | 5  | 3  |   |   |   |
| ENSP00000263025,ENSP000  | ENSG00000102882  | MAPK3    | 82  | 3  | 2  | 4  | 4  | 2  | 1  | 2  | 1  | 2  | 2  | 1 | 1  | 4  | 1  | 6  | 2  | 1  | 4  | 3  | 2  | 7  | 0  | 1  | 1  | 3  | 2  | 6  | 5  | 2  | 7  |   |   |   |
| ENSP00000263026,ENSP000  | ENSG00000103319  | EEF2K    | 26  | 0  | 0  | 0  | 2  | 0  | 2  | 1  | 0  | 1  | 0  | 0 | 0  | 1  | 1  | 0  | 0  | 1  | 2  | 1  | 0  | 1  | 1  | 1  | 0  | 2  | 2  | 3  | 0  | 1  | 3  |   |   |   |
| ENSP00000263035,ENSP000  | ENSG00000181192  | DHTKD1   | 13  | 1  | 0  | 1  | 0  | 0  | 1  | 0  | 1  | 0  | 1  | 0 | 0  | 1  | 0  | 0  | 1  | 0  | 0  | 1  | 0  | 0  | 1  | 0  | 1  | 0  | 1  | 0  | 0  | 0  | 2  |   |   |   |
| ENSP00000263036_rs52374  | ENSG00000123240  | OPTN     | 30  | 2  | 4  | 0  | 0  | 2  | 0  | 0  | 0  | 0  | 0  | 0 | 0  | 1  | 2  | 0  | 2  | 1  | 1  | 0  | 2  | 3  | 1  | 0  | 1  | 0  | 0  | 3  | 1  | 4  |    |   |   |   |
| ENSP00000263038,ENSP000  | ENSG00000107537  | MYH      | 13  | 2  | 3  | 3  | 0  | 0  | 0  | 1  | 0  | 1  | 0  | 0 | 0  | 0  | 0  | 0  | 0  | 0  | 0  | 0  | 0  | 0  | 1  | 1  | 0  | 0  | 1  | 0  | 0  | 0  | 0  |   |   |   |
| ENSP00000263063,ENSP000  | ENSG00000107951  | MTFAP    | 43  | 2  | 1  | 1  | 0  | 1  | 1  | 0  | 1  | 2  | 3  | 0 | 1  | 1  | 0  | 1  | 1  | 1  | 1  | 1  | 2  | 1  | 4  | 1  | 1  | 2  | 1  | 2  | 7  | 1  | 2  |   |   |   |
| ENSP00000263073,ENSP000  | ENSG00000073066  | SMG6     | 15  | 1  | 1  | 1  | 0  | 0  | 1  | 2  | 1  | 1  | 0  | 0 | 0  | 1  | 0  | 0  | 0  | 0  | 0  | 0  | 2  | 0  | 0  | 0  | 1  | 0  | 0  | 1  | 0  | 0  | 1  | 1 |   |   |
| ENSP00000263084,ENSP000  | ENSG000000021404 |          | 45  | 1  | 1  | 1  | 0  | 1  | 3  | 4  | 1  | 0  | 0  | 0 | 1  | 1  | 5  | 0  | 3  | 2  | 2  | 2  | 3  | 1  | 2  | 0  | 1  | 0  | 1  | 1  | 0  | 2  | 1  | 5 |   |   |
| ENSP00000263088,ENSP000  | ENSG00000129219  | PLD2     | 10  | 0  | 0  | 0  | 0  | 0  | 0  | 0  | 0  | 0  | 0  | 0 | 1  | 1  | 0  | 0  | 0  | 0  | 1  | 1  | 0  | 0  | 1  | 0  | 1  | 0  | 2  | 1  | 0  | 0  | 1  |   |   |   |
| ENSP00000263092,ENSP000  | ENSG00000127804  | METT10D  | 37  | 1  | 2  | 0  | 1  | 1  | 3  | 1  | 0  | 1  | 0  | 0 | 0  | 2  | 1  | 1  | 1  | 1  | 2  | 1  | 1  | 3  | 1  | 2  | 2  | 1  | 0  | 2  | 3  | 1  |    |   |   |   |
| ENSP00000263097          | ENSG00000064666  | CNN2     | 91  | 8  | 3  | 6  | 2  | 3  | 4  | 2  | 1  | 3  | 3  | 2 | 3  | 1  | 3  | 4  | 1  | 4  | 3  | 5  | 5  | 5  | 2  | 2  | 3  | 1  | 3  | 2  | 3  | 1  | 3  |   |   |   |
| ENSP00000263102,ENSP000  | ENSG00000108091  | CDC6     | 246 | 17 | 15 | 10 | 7  | 7  | 9  | 8  | 6  | 7  | 3  | 0 | 2  | 7  | 7  | 8  | 10 | 11 | 6  | 8  | 11 | 9  | 7  | 5  | 3  | 14 | 14 | 9  | 9  | 9  | 8  |   |   |   |
| ENSP00000263115,ENSP000  | ENSG00000100109  | TIP11    | 28  | 1  | 0  | 0  | 0  | 0  | 1  | 1  | 0  | 0  | 0  | 0 | 0  | 0  | 0  | 0  | 0  | 0  | 4  | 3  | 1  | 2  | 5  | 0  | 3  | 1  | 1  | 0  | 1  | 1  | 0  |   |   |   |
| ENSP00000263121,ENSP000  | ENSG00000099956  | SMARCB1  | 67  | 5  | 2  | 2  | 4  | 1  | 0  | 4  | 1  | 0  | 3  | 1 | 2  | 2  | 3  | 2  | 1  | 0  | 4  | 7  | 4  | 4  | 2  | 3  | 3  | 2  | 2  | 1  | 1  | 0  | 1  |   |   |   |
| ENSP00000263154,ENSP000  | ENSG00000107929  | LARP5    | 82  | 4  | 2  | 5  | 1  | 2  | 1  | 3  | 3  | 2  | 1  | 0 | 0  | 1  | 2  | 4  | 3  | 2  | 4  | 1  | 4  | 3  | 2  | 2  | 2  | 4  | 3  | 4  | 7  | 5  | 5  |   |   |   |
| ENSP00000263168,ENSP000  | ENSG00000116489  | CAPZA1   | 269 | 9  | 9  | 5  | 5  | 10 | 10 | 7  | 7  | 12 | 14 | 6 | 5  | 7  | 3  | 9  | 9  | 9  | 11 | 6  | 10 | 11 | 11 | 5  | 7  | 20 | 10 | 6  | 16 | 12 | 8  |   |   |   |
| ENSP00000263201,ENSP000  | ENSG00000103909  | CDC45L   | 13  | 0  | 0  | 0  | 0  | 1  | 1  | 1  | 1  | 0  | 0  | 0 | 0  | 0  | 0  | 0  | 0  | 0  | 1  | 0  | 1  | 0  | 1  | 0  | 2  | 0  | 0  | 1  | 1  | 0  | 1  | 2 |   |   |
| ENSP00000263202,ENSP000  | ENSG00000070010  | UFDL1    | 54  | 3  | 2  | 2  | 1  | 1  | 1  | 3  | 0  | 1  | 3  | 1 | 2  | 1  | 0  | 1  | 5  | 3  | 2  | 3  | 1  | 1  | 2  | 0  | 2  | 4  | 3  | 1  | 5  | 1  | 3  |   |   |   |
| ENSP00000263202_rs17744  | ENSG00000070010  | UFDL1    | 28  | 1  | 0  | 1  | 0  | 1  | 0  | 1  | 0  | 0  | 1  | 1 | 1  | 1  | 0  | 0  | 0  | 3  | 1  | 1  | 2  | 0  | 0  | 1  | 0  | 1  | 3  | 1  | 0  | 3  | 0  | 1 |   |   |
| ENSP00000263205,ENSP000  | ENSG00000099917  | MD51     | 25  | 0  | 1  | 0  | 1  | 0  | 1  | 2  | 0  | 0  | 1  | 2 | 1  | 2  | 1  | 1  | 1  | 1  | 2  | 3  | 2  | 0  | 0  | 2  | 0  | 0  | 0  | 0  | 0  | 1  | 0  |   |   |   |
| ENSP00000263208,ENSP000  | ENSG00000100084  | HIRA     | 27  | 2  | 0  | 1  | 0  | 0  | 1  | 2  | 1  | 0  | 0  | 1 | 1  | 0  | 0  | 2  | 0  | 0  | 2  | 3  | 2  | 0  | 3  | 1  | 1  | 3  | 1  | 0  | 0  | 0  | 0  |   |   |   |
| ENSP00000263212,ENSP000  | ENSG00000100034  | ACTR3    | 20  | 0  | 1  | 0  | 1  | 1  | 1  | 1  | 0  | 0  | 0  | 0 | 0  | 1  | 0  | 1  | 0  | 0  | 1  | 0  | 1  | 2  | 0  | 0  | 0  | 0  | 1  | 1  | 0  | 3  | 4  | 1 |   |   |
| ENSP00000263238          | ENSG00000115091  | PCMT1    | 420 | 25 | 16 | 20 | 14 | 20 | 17 | 14 | 13 | 16 | 9  | 7 | 10 | 10 | 13 | 12 | 10 | 13 | 11 | 14 | 16 | 17 | 11 | 10 | 8  | 19 | 20 | 17 | 15 | 11 | 12 |   |   |   |
| ENSP00000263239_P547A    | ENSG00000088205  | DDX18    | 351 | 14 | 8  | 12 | 10 | 10 | 8  | 12 | 11 | 8  | 22 | 7 | 15 | 13 | 6  | 12 | 13 | 11 | 14 | 15 | 13 | 13 | 12 | 12 | 10 | 14 | 8  | 8  | 17 | 11 | 12 |   |   |   |
| ENSP00000263239_rs10526  | ENSG00000088205  | DDX18    | 400 | 16 | 10 | 14 | 10 | 11 | 10 | 13 | 13 | 10 | 22 | 7 | 15 | 14 | 7  | 13 | 15 | 14 | 16 | 17 | 14 | 15 | 14 | 12 | 16 | 11 | 10 | 20 | 12 | 14 |    |   |   |   |
| ENSP00000263243,ENSP000  | ENSG00000100403  | ZC3H7B   | 37  | 1  | 1  | 2  | 2  | 1  | 1  | 3  | 0  | 0  | 0  | 0 | 0  | 1  | 1  | 0  | 1  | 3  | 1  | 4  | 4  | 1  | 0  | 1  | 1  | 0  | 2  | 1  | 0  | 2  | 3  |   |   |   |
| ENSP00000263245_S355R,ET | ENSG00000100262  | ARFGAP3  | 29  | 2  | 2  | 0  | 0  | 1  | 1  | 1  | 0  | 0  | 0  | 0 | 0  | 0  | 0  | 1  | 1  | 2  | 1  | 0  | 0  | 0  | 2  | 1  | 2  | 3  | 2  | 1  | 3  | 1  | 1  |   |   |   |
| ENSP00000263246,ENSP000  | ENSG00000100266  | PACSIN2  | 163 | 13 | 9  | 6  | 4  | 9  | 9  | 4  | 4  | 3  | 2  | 4 | 7  | 4  | 6  | 3  | 5  | 3  | 8  | 6  | 6  | 7  | 4  | 3  | 11 | 6  | 3  | 4  | 4  | 3  |    |   |   |   |
| ENSP00000263247_rs17496  | ENSG00000221877  | APOBEC3G | 10  | 0  | 0  | 0  | 0  | 0  | 0  | 0  | 0  | 0  | 4  | 1 | 4  | 0  | 0  | 0  | 0  | 0  | 0  | 0  | 0  | 0  | 0  | 0  | 1  | 0  | 0  | 0  | 0  | 0  | 0  |   |   |   |
| ENSP00000263253,ENSP000  | ENSG00000100393  | EP300    | 23  | 1  | 0  | 1  | 0  | 1  | 0  | 1  | 1  | 2  | 0  | 2 | 2  | 0  | 2  | 0  | 0  | 1  | 0  | 1  | 1  | 1  | 1  | 2  | 2  | 0  | 0  | 1  | 1  | 0  | 0  |   |   |   |
| ENSP00000263262,ENSP000  | ENSG00000087088  | BAX      | 140 | 6  | 8  | 2  | 7  | 8  | 3  | 7  | 2  | 4  | 2  | 6 | 2  | 2  | 8  | 3  | 3  | 6  | 2  | 5  | 14 | 6  | 0  | 0  | 1  | 0  | 0  | 11 | 12 | 10 |    |   |   |   |
| ENSP00000263270,ENSP000  | ENSG000000042753 | AP2S1    | 31  | 3  | 0  | 1  | 0  | 1  | 0  | 2  | 0  | 1  | 0  | 0 | 0  | 2  | 1  | 2  | 1  | 0  | 2  | 3  | 0  | 2  | 1  | 1  | 1  | 3  | 1  | 1  | 1  | 0  | 1  |   |   |   |
| ENSP00000263273,ENSP000  | ENSG00000104805  | NUCB1    | 250 | 11 | 13 | 8  | 8  | 12 | 13 | 11 | 8  | 10 | 1  | 3 | 2  | 6  | 4  | 6  | 10 | 18 | 11 | 5  | 8  | 5  | 9  | 13 | 4  | 9  | 12 | 11 | 7  | 8  | 4  |   |   |   |
| ENSP00000263273_D60N,R3  | ENSG00000104805  | NUCB1    | 239 | 11 | 13 | 7  | 8  | 12 | 11 | 11 | 8  | 9  | 1  | 3 | 2  | 6  | 4  | 5  | 8  | 18 | 10 | 5  | 8  | 5  | 9  | 13 | 4  | 9  | 12 | 10 | 6  | 7  | 4  |   |   |   |
| ENSP00000263274,ENSP000  | ENSG00000105486  | UG1      | 244 | 16 | 6  | 7  | 10 | 6  | 13 | 19 | 3  | 15 | 8  | 5 | 2  | 6  | 7  | 9  | 7  | 2  | 10 | 14 | 15 | 13 | 5  | 5  | 3  | 8  | 1  | 6  | 5  | 8  | 10 |   |   |   |
| ENSP00000263275          | ENSG00000125741  | OPA3     | 14  | 1  | 1  | 0  | 1  | 0  | 0  | 1  | 1  | 0  | 0  | 2 | 1  | 0  | 0  | 0  | 0  | 0  | 0  | 0  | 1  | 0  | 1  | 0  | 1  | 0  | 1  | 0  | 1  | 0  | 1  |   |   |   |
| ENSP00000263276,ENSP000  | ENSG00000104812  | GYS1     | 101 | 5  | 0  | 1  | 4  | 1  | 3  | 7  | 3  | 5  | 0  | 0 | 0  | 1  | 5  | 1  | 7  | 4  | 3  | 7  | 3  | 2  | 4  | 3  | 2  | 3  | 4  | 6  | 4  | 4  | 2  | 7 |   |   |
| ENSP00000263277,ENSP000  | ENSG000000024422 | HDH2     | 10  | 0  | 0  | 0  | 0  | 0  | 1  | 0  | 0  | 0  | 1  | 0 | 0  | 0  | 0  | 0  | 0  | 1  | 1  |    |    |    |    |    |    |    |    |    |    |    |    |   |   |   |

|                          |                  |              |      |    |    |    |    |    |    |    |    |    |    |    |    |    |    |    |    |    |    |    |    |    |      |    |    |    |    |    |    |    |    |    |   |
|--------------------------|------------------|--------------|------|----|----|----|----|----|----|----|----|----|----|----|----|----|----|----|----|----|----|----|----|----|------|----|----|----|----|----|----|----|----|----|---|
| ENSP00000263847,ENSP0000 | ENSG00000110048  | OSBP         | 260  | 10 | 10 | 7  | 11 | 10 | 13 | 10 | 10 | 5  | 3  | 3  | 5  | 8  | 10 | 7  | 5  | 7  | 5  | 12 | 15 | 9  | 8    | 5  | 3  | 13 | 15 | 13 | 10 | 11 | 7  |    |   |
| ENSP00000263857,ENSP0000 | ENSG00000088654  | POLR1A       | 158  | 4  | 3  | 4  | 3  | 2  | 0  | 4  | 6  | 3  | 5  | 3  | 3  | 7  | 9  | 4  | 4  | 4  | 4  | 7  | 7  | 2  | 13   | 7  | 9  | 6  | 6  | 4  | 12 | 6  | 5  |    |   |
| ENSP00000263864          | ENSG00000118640  | VAMP8        | 27   | 1  | 0  | 0  | 0  | 0  | 2  | 2  | 1  | 1  | 1  | 3  | 2  | 3  | 1  | 0  | 2  | 0  | 0  | 0  | 0  | 0  | 1    | 1  | 2  | 3  | 1  | 1  | 0  | 0  | 0  |    |   |
| ENSP00000263867,ENSP0000 | ENSG00000042493  | CAPG         | 105  | 0  | 0  | 0  | 1  | 2  | 2  | 7  | 9  | 14 | 2  | 2  | 2  | 1  | 0  | 0  | 2  | 8  | 4  | 7  | 0  | 2  | 1    | 11 | 5  | 3  | 1  | 0  | 1  | 10 | 4  | 6  |   |
| ENSP00000263897_rs414521 | ENSG00000053501  | USE1         | 26   | 2  | 1  | 2  | 1  | 0  | 1  | 0  | 0  | 0  | 0  | 1  | 1  | 0  | 1  | 0  | 1  | 0  | 1  | 2  | 0  | 1  | 0    | 0  | 2  | 1  | 2  | 2  | 1  | 0  | 2  |    |   |
| ENSP00000263904          | ENSG00000115145  | STAM2        | 54   | 3  | 2  | 1  | 2  | 4  | 2  | 3  | 1  | 1  | 1  | 1  | 0  | 2  | 1  | 3  | 2  | 4  | 2  | 2  | 2  | 2  | 1    | 1  | 0  | 3  | 3  | 2  | 1  | 1  | 1  |    |   |
| ENSP00000263918          | ENSG00000115808  | STRN         | 68   | 4  | 3  | 1  | 2  | 4  | 1  | 2  | 2  | 2  | 4  | 1  | 2  | 3  | 2  | 3  | 3  | 1  | 2  | 2  | 3  | 1  | 3    | 3  | 2  | 4  | 3  | 3  | 1  | 1  | 2  |    |   |
| ENSP00000263934,ENSP0000 | ENSG00000054523  | KIF1B        | 42   | 2  | 4  | 0  | 3  | 3  | 1  | 1  | 0  | 0  | 0  | 1  | 0  | 2  | 2  | 3  | 0  | 1  | 0  | 0  | 4  | 2  | 2    | 2  | 2  | 0  | 3  | 3  | 1  | 0  | 2  | 2  |   |
| ENSP00000263956          | ENSG00000119041  | GTF3C3       | 77   | 2  | 2  | 1  | 3  | 2  | 2  | 2  | 3  | 1  | 1  | 3  | 2  | 3  | 3  | 2  | 2  | 2  | 4  | 3  | 3  | 2  | 3    | 3  | 2  | 3  | 5  | 2  | 4  | 3  | 4  |    |   |
| ENSP00000263964          | ENSG00000117565  | TBLX1R1      | 40   | 2  | 0  | 0  | 1  | 0  | 2  | 3  | 0  | 2  | 2  | 0  | 2  | 0  | 0  | 0  | 1  | 1  | 3  | 2  | 2  | 1  | 2    | 2  | 3  | 2  | 1  | 2  | 1  | 0  | 1  | 3  |   |
| ENSP00000263966          | ENSG00000058056  | USP13        | 11   | 0  | 0  | 1  | 1  | 2  | 1  | 0  | 0  | 0  | 1  | 0  | 0  | 0  | 0  | 0  | 0  | 1  | 1  | 1  | 0  | 0  | 0    | 0  | 0  | 0  | 0  | 0  | 0  | 2  | 0  | 0  |   |
| ENSP00000263969,ENSP0000 | ENSG00000017109  | MFN1         | 28   | 1  | 1  | 0  | 1  | 1  | 1  | 2  | 1  | 0  | 1  | 0  | 1  | 1  | 1  | 1  | 1  | 2  | 2  | 0  | 1  | 0  | 0    | 1  | 1  | 1  | 2  | 0  | 0  | 1  | 3  | 1  |   |
| ENSP00000263985          | ENSG00000059691  | PTT112L      | 31   | 0  | 1  | 1  | 0  | 0  | 0  | 0  | 1  | 0  | 1  | 0  | 2  | 0  | 0  | 2  | 2  | 2  | 1  | 1  | 2  | 0  | 1    | 1  | 1  | 1  | 2  | 3  | 4  | 1  | 1  | 1  |   |
| ENSP00000263989,ENSP0000 | ENSG00000115464  | UPS34        | 41   | 3  | 0  | 4  | 0  | 1  | 2  | 0  | 1  | 1  | 3  | 1  | 3  | 0  | 1  | 2  | 3  | 1  | 1  | 1  | 2  | 0  | 4    | 1  | 1  | 1  | 1  | 1  | 2  | 0  | 1  | 1  |   |
| ENSP00000263991,ENSP0000 | ENSG00000115504  | EHBP1        | 34   | 2  | 3  | 1  | 3  | 0  | 0  | 4  | 1  | 3  | 0  | 0  | 0  | 0  | 3  | 1  | 1  | 1  | 1  | 1  | 2  | 1  | 0    | 1  | 0  | 0  | 3  | 1  | 0  | 1  | 0  | 0  |   |
| ENSP00000264010,ENSP0000 | ENSG00000102974  | CTCF         | 30   | 0  | 2  | 2  | 2  | 1  | 2  | 3  | 1  | 1  | 1  | 1  | 0  | 1  | 1  | 3  | 1  | 0  | 0  | 0  | 1  | 0  | 2    | 1  | 0  | 1  | 0  | 1  | 0  | 0  | 1  | 0  | 2 |
| ENSP00000264012,ENSP0000 | ENSG00000062038  | CDH3         | 58   | 4  | 3  | 5  | 0  | 0  | 0  | 2  | 0  | 1  | 0  | 3  | 0  | 1  | 3  | 0  | 1  | 3  | 5  | 7  | 2  | 0  | 6    | 3  | 1  | 3  | 0  | 2  | 3  | 0  | 0  | 0  |   |
| ENSP00000264018,ENSP0000 | ENSG00000110367  | DDX6         | 176  | 9  | 5  | 7  | 6  | 7  | 9  | 4  | 5  | 5  | 10 | 3  | 3  | 4  | 4  | 7  | 7  | 11 | 2  | 5  | 5  | 5  | 5    | 2  | 3  | 8  | 9  | 5  | 11 | 5  | 5  | 7  |   |
| ENSP00000264028,ENSP0000 | ENSG00000009519  | ARCN1        | 236  | 18 | 7  | 12 | 9  | 9  | 15 | 15 | 4  | 11 | 4  | 0  | 0  | 4  | 5  | 2  | 8  | 7  | 6  | 8  | 11 | 9  | 6    | 9  | 4  | 4  | 10 | 7  | 12 | 8  | 5  | 7  |   |
| ENSP00000264033,ENSP0000 | ENSG00000110395  | CBL          | 29   | 2  | 2  | 0  | 1  | 1  | 0  | 1  | 0  | 0  | 0  | 0  | 0  | 1  | 0  | 1  | 3  | 3  | 1  | 2  | 1  | 2  | 0    | 0  | 0  | 0  | 0  | 0  | 2  | 3  | 0  | 3  |   |
| ENSP00000264036,ENSP0000 | ENSG00000076706  | MCAM         | 11   | 0  | 0  | 0  | 0  | 0  | 0  | 0  | 0  | 0  | 0  | 3  | 6  | 2  | 0  | 0  | 0  | 0  | 0  | 0  | 0  | 0  | 0    | 0  | 0  | 0  | 0  | 0  | 0  | 0  | 0  | 0  |   |
| ENSP00000264039,ENSP0000 | ENSG00000036660  | GPC1         | 23   | 0  | 0  | 0  | 0  | 0  | 0  | 0  | 0  | 0  | 4  | 2  | 5  | 0  | 0  | 0  | 1  | 0  | 1  | 0  | 5  | 0  | 2    | 0  | 1  | 0  | 0  | 0  | 0  | 1  | 1  | 0  |   |
| ENSP00000264042,ENSP0000 | ENSG00000006607  | FARP2        | 31   | 0  | 0  | 0  | 3  | 1  | 1  | 1  | 2  | 3  | 2  | 0  | 0  | 0  | 0  | 0  | 0  | 4  | 0  | 0  | 1  | 0  | 2    | 1  | 0  | 0  | 3  | 1  | 3  | 0  | 1  | 2  |   |
| ENSP00000264052,ENSP0000 | ENSG00000067066  | SP100        | 75   | 1  | 0  | 3  | 2  | 2  | 3  | 6  | 3  | 4  | 1  | 0  | 1  | 0  | 1  | 0  | 2  | 0  | 3  | 5  | 2  | 3  | 6    | 3  | 1  | 2  | 3  | 1  | 3  | 4  | 4  | 6  |   |
| ENSP00000264065,ENSP0000 | ENSG00000077232  | DNAUC10      | 85   | 5  | 0  | 3  | 2  | 2  | 3  | 6  | 4  | 4  | 1  | 1  | 4  | 1  | 1  | 4  | 4  | 2  | 2  | 1  | 4  | 1  | 4    | 1  | 4  | 2  | 4  | 2  | 4  | 2  | 5  | 3  |   |
| ENSP00000264071          | ENSG00000104833  | TUBB8A       | 1174 | 43 | 47 | 33 | 26 | 69 | 42 | 36 | 13 | 25 | 32 | 21 | 19 | 32 | 48 | 33 | 35 | 43 | 38 | 38 | 63 | 32 | 35   | 27 | 24 | 58 | 68 | 49 | 59 | 46 | 40 |    |   |
| ENSP00000264073,ENSP0000 | ENSG00000066044  | ELAVL1       | 301  | 13 | 9  | 9  | 4  | 7  | 9  | 10 | 5  | 6  | 14 | 8  | 9  | 13 | 7  | 10 | 10 | 14 | 14 | 6  | 14 | 12 | 15   | 8  | 10 | 12 | 19 | 9  | 8  | 11 | 6  |    |   |
| ENSP00000264090,ENSP0000 | ENSG00000065911  | MTHFD2       | 159  | 4  | 3  | 6  | 5  | 7  | 4  | 4  | 3  | 4  | 9  | 6  | 5  | 6  | 6  | 5  | 6  | 7  | 6  | 6  | 4  | 6  | 4    | 3  | 5  | 8  | 4  | 5  | 8  | 4  | 6  |    |   |
| ENSP00000264106,ENSP0000 | ENSG000000091409 | ITGA6        | 368  | 4  | 1  | 4  | 21 | 30 | 26 | 10 | 9  | 17 | 18 | 9  | 15 | 11 | 7  | 15 | 4  | 11 | 13 | 5  | 6  | 4  | 24   | 16 | 17 | 30 | 18 | 22 | 0  | 1  | 0  |    |   |
| ENSP00000264108          | ENSG00000128708  | HAT1         | 211  | 7  | 6  | 8  | 10 | 9  | 2  | 6  | 2  | 10 | 10 | 4  | 4  | 6  | 2  | 5  | 9  | 7  | 6  | 6  | 9  | 10 | 9    | 7  | 4  | 3  | 8  | 13 | 6  | 12 | 8  | 9  |   |
| ENSP00000264128          | ENSG00000084128  | SLC25A24     | 232  | 4  | 4  | 5  | 5  | 4  | 8  | 6  | 8  | 10 | 10 | 1  | 7  | 11 | 5  | 15 | 7  | 8  | 6  | 10 | 10 | 7  | 15   | 7  | 11 | 12 | 10 | 10 | 9  | 5  | 7  |    |   |
| ENSP00000264144,ENSP0000 | ENSG00000058085  | LAMC2        | 11   | 0  | 1  | 0  | 0  | 0  | 0  | 0  | 0  | 0  | 2  | 0  | 0  | 0  | 0  | 1  | 0  | 1  | 0  | 1  | 0  | 0  | 1    | 2  | 0  | 0  | 0  | 0  | 0  | 0  | 0  | 0  |   |
| ENSP00000264151,ENSP0000 | ENSG000000128694 | OSGEPL1      | 33   | 3  | 0  | 1  | 2  | 1  | 2  | 1  | 0  | 1  | 1  | 0  | 1  | 3  | 1  | 1  | 1  | 1  | 1  | 4  | 1  | 1  | 2    | 0  | 1  | 0  | 2  | 0  | 0  | 0  | 1  | 1  |   |
| ENSP00000264156,ENSP0000 | ENSG00000076003  | MC6M6        | 556  | 32 | 17 | 14 | 14 | 23 | 17 | 16 | 16 | 17 | 30 | 18 | 15 | 12 | 18 | 17 | 18 | 17 | 18 | 25 | 11 | 20 | 5    | 30 | 18 | 25 | 25 | 19 | 15 | 22 | 25 | 19 |   |
| ENSP00000264158,ENSP0000 | ENSG00000115839  | RAB3GAP1     | 91   | 6  | 1  | 2  | 7  | 6  | 4  | 5  | 2  | 1  | 0  | 0  | 0  | 4  | 4  | 3  | 18 | 5  | 2  | 6  | 5  | 4  | 2    | 0  | 2  | 1  | 1  | 7  | 3  | 4  | 0  |    |   |
| ENSP00000264161          | ENSG00000115866  | DARS         | 611  | 30 | 24 | 15 | 21 | 37 | 19 | 17 | 14 | 13 | 17 | 8  | 15 | 20 | 18 | 15 | 22 | 29 | 20 | 21 | 26 | 15 | 25   | 16 | 12 | 28 | 23 | 15 | 35 | 22 | 19 |    |   |
| ENSP00000264167          | ENSG00000018510  | AGPS         | 341  | 19 | 9  | 14 | 5  | 15 | 14 | 6  | 8  | 9  | 19 | 6  | 9  | 8  | 7  | 16 | 11 | 11 | 12 | 10 | 9  | 14 | 17   | 8  | 11 | 13 | 16 | 13 | 13 | 11 | 8  |    |   |
| ENSP00000264169,ENSP0000 | ENSG000000115947 | ORCAL        | 44   | 3  | 0  | 1  | 1  | 1  | 2  | 4  | 2  | 1  | 4  | 0  | 3  | 2  | 0  | 1  | 2  | 4  | 2  | 1  | 0  | 1  | 2    | 0  | 2  | 1  | 1  | 1  | 1  | 0  | 1  |    |   |
| ENSP00000264183,ENSP0000 | ENSG00000054267  | ARID4B       | 16   | 0  | 0  | 2  | 1  | 0  | 0  | 0  | 0  | 0  | 0  | 0  | 1  | 2  | 0  | 1  | 1  | 0  | 1  | 2  | 0  | 0  | 2    | 1  | 0  | 0  | 1  | 0  | 0  | 0  | 1  |    |   |
| ENSP00000264193,ENSP0000 | ENSG00000080819  | CPOX         | 245  | 3  | 5  | 4  | 4  | 4  | 3  | 4  | 4  | 3  | 5  | 1  | 6  | 14 | 12 | 20 | 25 | 26 | 27 | 11 | 5  | 6  | 6    | 4  | 5  | 5  | 1  | 2  | 11 | 10 | 9  |    |   |
| ENSP00000264205,ENSP0000 | ENSG000000117298 | ECE1         | 25   | 3  | 0  | 0  | 1  | 1  | 1  | 1  | 2  | 1  | 1  | 0  | 1  | 1  | 0  | 0  | 1  | 1  | 1  | 2  | 1  | 1  | 1    | 0  | 0  | 2  | 0  | 0  | 1  | 0  | 1  |    |   |
| ENSP00000264211,ENSP0000 | ENSG00000075151  | EIF4G3       | 289  | 16 | 10 | 5  | 12 | 6  | 7  | 15 | 11 | 7  | 6  | 0  | 5  | 3  | 1  | 11 | 5  | 12 | 11 | 18 | 17 | 12 | 15   | 7  | 6  | 12 | 15 | 6  | 10 | 17 | 11 |    |   |
| ENSP00000264220,ENSP0000 | ENSG000000128059 | PPAT         | 102  | 5  | 3  | 2  | 3  | 1  | 1  | 3  | 3  | 1  | 1  | 0  | 0  | 4  | 2  | 1  | 6  | 9  | 6  | 5  | 3  | 3  | 2    | 4  | 2  | 3  | 4  | 4  | 7  | 8  | 6  |    |   |
| ENSP00000264221          | ENSG00000128050  | PAICS        | 397  | 11 | 6  | 11 | 9  | 15 | 11 | 10 | 9  | 13 | 11 | 1  | 7  | 12 | 9  | 13 | 17 | 20 | 19 | 16 | 22 | 22 | 10   | 5  | 6  | 22 | 19 | 16 | 20 | 16 | 19 |    |   |
| ENSP00000264230,ENSP0000 | ENSG00000084092  | Acorf14      | 60   | 4  | 3  | 4  | 1  | 2  | 2  | 0  | 1  | 1  | 3  | 2  | 0  | 3  | 2  | 1  | 4  | 4  | 5  | 2  | 1  | 1  | 3    | 2  | 2  | 1  | 1  | 0  | 0  | 0  | 2  | 3  |   |
| ENSP00000264235,ENSP0000 | ENSG000000082701 | GSK3B        | 41   | 2  | 0  | 2  | 2  | 0  | 2  | 0  | 1  | 1  | 0  | 0  | 0  | 3  | 1  | 1  | 1  | 1  | 2  | 2  | 0  | 2  | 1    | 0  | 1  | 5  | 1  | 2  | 4  | 1  | 1  |    |   |
| ENSP00000264244,ENSP0000 | ENSG00000113845  | C3orf1       | 38   | 1  | 1  | 0  | 2  | 0  | 0  | 1  | 2  | 1  | 2  | 1  | 0  | 1  | 0  | 2  | 1  | 0  | 0  | 1  | 1  | 1  | 3    | 2  | 1  | 2  | 2  | 0  | 0  | 5  | 3  | 1  |   |
| ENSP00000264254,ENSP0000 | ENSG00000115539  | PDCL3        | 53   | 4  | 2  | 1  | 2  | 1  | 1  | 4  | 1  | 3  | 0  | 0  | 0  | 1  | 0  | 1  | 3  | 2  | 4  | 2  | 6  | 3  | 1    | 0  | 2  | 2  | 1  | 1  | 0  | 2  | 3  |    |   |
| ENSP00000264255,ENSP0000 | ENSG00000115514  | TXNDC9       | 24   | 2  | 2  | 1  | 1  | 0  | 1  | 1  | 0  | 4  | 1  | 0  | 1  | 1  | 2  | 0  | 0  | 0  | 0  | 2  | 1  | 1  | 1    | 0  | 0  | 1  | 0  | 0  | 1  | 0  | 0  |    |   |
| ENSP00000264258,ENSP0000 | ENSG00000071082  | RPL31P7, RPL | 180  | 3  | 10 | 6  | 2  | 5  | 3  | 5  | 5  | 4  | 8  | 3  | 5  | 3  | 8  | 5  | 4  | 7  | 5  | 10 | 13 | 4  | 11</ |    |    |    |    |    |    |    |    |    |   |

|                         |                 |              |     |    |    |    |    |    |    |    |    |    |    |    |    |    |    |    |    |    |    |    |    |    |    |    |    |    |    |    |    |    |    |   |
|-------------------------|-----------------|--------------|-----|----|----|----|----|----|----|----|----|----|----|----|----|----|----|----|----|----|----|----|----|----|----|----|----|----|----|----|----|----|----|---|
| ENSP00000264893         | ENSG00000138758 | SEPT11       | 223 | 10 | 7  | 9  | 10 | 7  | 6  | 6  | 5  | 5  | 7  | 1  | 4  | 7  | 6  | 11 | 8  | 8  | 8  | 10 | 7  | 9  | 12 | 4  | 5  | 12 | 7  | 5  | 7  | 9  | 11 |   |
| ENSP00000264895,ENSP000 | ENSG00000138759 | FRAS1        | 12  | 2  | 1  | 0  | 0  | 0  | 0  | 0  | 0  | 0  | 0  | 0  | 0  | 2  | 1  | 0  | 0  | 1  | 0  | 3  | 1  | 0  | 0  | 0  | 0  | 0  | 0  | 1  | 0  | 0  | 0  |   |
| ENSP00000264896         | ENSG00000138760 | SCARB2       | 244 | 10 | 6  | 7  | 10 | 11 | 8  | 13 | 12 | 9  | 7  | 3  | 5  | 7  | 3  | 9  | 2  | 6  | 3  | 11 | 7  | 10 | 14 | 6  | 8  | 16 | 10 | 13 | 7  | 5  | 6  |   |
| ENSP00000264904,ENSP000 | ENSG00000138760 | USO1         | 332 | 10 | 4  | 5  | 13 | 9  | 15 | 18 | 6  | 9  | 6  | 3  | 4  | 10 | 10 | 14 | 11 | 12 | 12 | 16 | 13 | 11 | 16 | 7  | 10 | 24 | 17 | 15 | 17 | 7  | 8  |   |
| ENSP00000264907,ENSP000 | ENSG00000138771 | SHROOM3      | 67  | 1  | 0  | 0  | 1  | 1  | 0  | 0  | 1  | 0  | 0  | 2  | 2  | 6  | 6  | 8  | 0  | 0  | 0  | 9  | 7  | 4  | 5  | 6  | 4  | 0  | 1  | 2  | 0  | 0  | 1  |   |
| ENSP00000264908,ENSP000 | ENSG00000138772 | ANXA3        | 512 | 28 | 22 | 23 | 16 | 35 | 23 | 11 | 12 | 12 | 19 | 8  | 12 | 19 | 23 | 22 | 25 | 38 | 23 | 25 | 21 | 19 | 17 | 13 | 11 | 15 | 13 | 7  | 0  | 0  | 0  |   |
| ENSP00000264926_rs37357 | ENSG00000070950 | RAD18        | 37  | 0  | 2  | 1  | 1  | 1  | 0  | 0  | 0  | 0  | 1  | 0  | 1  | 2  | 1  | 6  | 1  | 0  | 1  | 1  | 4  | 2  | 3  | 2  | 0  | 1  | 1  | 0  | 0  | 3  | 1  |   |
| ENSP00000264930,ENSP000 | ENSG00000113504 | SLC12A7      | 46  | 0  | 0  | 1  | 6  | 4  | 2  | 5  | 3  | 4  | 3  | 1  | 2  | 0  | 0  | 0  | 0  | 1  | 0  | 1  | 0  | 0  | 0  | 2  | 1  | 2  | 3  | 2  | 2  | 1  | 0  | 0 |
| ENSP00000264932_rs6962  | ENSG00000073578 | SDHA         | 83  | 4  | 2  | 4  | 2  | 1  | 3  | 2  | 1  | 5  | 4  | 0  | 1  | 2  | 1  | 1  | 3  | 2  | 2  | 3  | 2  | 3  | 7  | 3  | 6  | 7  | 3  | 3  | 3  | 2  | 1  |   |
| ENSP00000264933         | ENSG00000063438 | AHRH,PDCC6   | 50  | 0  | 1  | 2  | 4  | 3  | 4  | 6  | 0  | 4  | 0  | 0  | 1  | 0  | 0  | 1  | 0  | 1  | 2  | 3  | 1  | 2  | 2  | 0  | 1  | 2  | 1  | 3  | 2  | 2  | 2  |   |
| ENSP00000264951,ENSP000 | ENSG00000114127 | XRN1         | 76  | 1  | 2  | 0  | 5  | 3  | 3  | 3  | 2  | 0  | 1  | 0  | 1  | 3  | 1  | 2  | 5  | 8  | 3  | 7  | 4  | 3  | 0  | 1  | 1  | 2  | 5  | 2  | 4  | 3  | 1  |   |
| ENSP00000264954_K66N    | ENSG00000109519 | GRPEL1       | 196 | 5  | 6  | 6  | 4  | 5  | 4  | 5  | 4  | 4  | 7  | 7  | 2  | 4  | 8  | 7  | 4  | 6  | 8  | 7  | 14 | 6  | 6  | 10 | 6  | 7  | 5  | 9  | 13 | 11 | 6  |   |
| ENSP00000264993         | ENSG00000091527 | CDV3         | 149 | 9  | 3  | 3  | 4  | 3  | 5  | 3  | 4  | 7  | 4  | 2  | 2  | 3  | 4  | 3  | 2  | 7  | 5  | 8  | 9  | 5  | 4  | 4  | 4  | 7  | 5  | 7  | 8  | 9  | 6  |   |
| ENSP00000264995         | ENSG00000114686 | MRPL3        | 28  | 0  | 1  | 1  | 1  | 0  | 2  | 1  | 1  | 1  | 1  | 1  | 1  | 0  | 2  | 2  | 1  | 1  | 0  | 1  | 1  | 1  | 1  | 0  | 1  | 1  | 1  | 0  | 2  | 1  | 1  |   |
| ENSP00000265000         | ENSG00000109586 | GALNT7       | 97  | 1  | 1  | 0  | 5  | 3  | 6  | 8  | 3  | 3  | 3  | 0  | 1  | 7  | 1  | 5  | 0  | 2  | 2  | 7  | 3  | 2  | 7  | 4  | 5  | 7  | 3  | 4  | 2  | 1  | 1  |   |
| ENSP00000265014         | ENSG00000007062 | PROM1        | 15  | 3  | 2  | 6  | 0  | 0  | 0  | 0  | 0  | 0  | 0  | 0  | 0  | 0  | 0  | 0  | 0  | 0  | 0  | 0  | 0  | 0  | 2  | 1  | 1  | 0  | 0  | 0  | 0  | 0  |    |   |
| ENSP00000265028,ENSP000 | ENSG00000090520 | DNAJB11      | 307 | 10 | 8  | 11 | 7  | 18 | 13 | 12 | 9  | 14 | 16 | 8  | 5  | 7  | 9  | 10 | 7  | 17 | 8  | 10 | 16 | 9  | 13 | 10 | 11 | 12 | 7  | 4  | 10 | 7  | 9  |   |
| ENSP00000265044         | ENSG00000114850 | SR3          | 91  | 6  | 2  | 2  | 1  | 3  | 3  | 1  | 3  | 3  | 2  | 3  | 4  | 0  | 0  | 2  | 4  | 5  | 3  | 0  | 4  | 3  | 7  | 2  | 4  | 4  | 3  | 5  | 5  | 2  | 5  |   |
| ENSP00000265052,ENSP000 | ENSG00000074416 | MGLL         | 74  | 3  | 1  | 3  | 1  | 3  | 3  | 3  | 4  | 6  | 1  | 0  | 0  | 0  | 0  | 3  | 0  | 6  | 4  | 3  | 1  | 5  | 4  | 1  | 2  | 3  | 4  | 3  | 2  | 2  | 3  |   |
| ENSP00000265056_R227H   | ENSG00000073111 | MCML2        | 629 | 29 | 22 | 24 | 19 | 34 | 15 | 17 | 10 | 20 | 44 | 11 | 18 | 18 | 20 | 22 | 19 | 20 | 21 | 24 | 26 | 21 | 20 | 9  | 7  | 24 | 27 | 17 | 25 | 24 | 22 |   |
| ENSP00000265062         | ENSG00000075785 | RAB7A        | 482 | 22 | 10 | 21 | 13 | 21 | 19 | 17 | 18 | 19 | 23 | 7  | 16 | 16 | 10 | 17 | 13 | 12 | 15 | 14 | 15 | 14 | 24 | 10 | 16 | 23 | 18 | 12 | 18 | 14 | 15 |   |
| ENSP00000265069,ENSP000 | ENSG00000056097 | ZFR          | 145 | 8  | 5  | 4  | 4  | 1  | 1  | 7  | 4  | 1  | 7  | 5  | 5  | 3  | 6  | 5  | 1  | 8  | 2  | 6  | 6  | 8  | 9  | 9  | 6  | 2  | 4  | 3  | 7  | 6  | 2  |   |
| ENSP00000265070,ENSP000 | ENSG00000113384 | GOLPH3       | 97  | 3  | 5  | 5  | 3  | 7  | 4  | 3  | 5  | 1  | 0  | 0  | 0  | 2  | 1  | 2  | 2  | 3  | 3  | 4  | 7  | 4  | 4  | 1  | 3  | 5  | 5  | 1  | 2  | 2  | 2  |   |
| ENSP00000265073         | ENSG00000113387 | SUB1         | 247 | 7  | 10 | 11 | 7  | 15 | 8  | 6  | 7  | 8  | 8  | 3  | 6  | 7  | 6  | 6  | 10 | 13 | 8  | 5  | 14 | 7  | 12 | 8  | 7  | 12 | 6  | 10 | 7  | 6  | 6  |   |
| ENSP00000265075,ENSP000 | ENSG00000113360 | NRASEN       | 17  | 0  | 0  | 0  | 2  | 1  | 0  | 1  | 0  | 1  | 1  | 0  | 2  | 1  | 1  | 0  | 0  | 1  | 0  | 2  | 0  | 0  | 0  | 1  | 1  | 0  | 0  | 0  | 1  | 1  | 0  |   |
| ENSP00000265081,ENSP000 | ENSG00000113318 | MRSH         | 72  | 2  | 0  | 1  | 1  | 8  | 3  | 7  | 8  | 4  | 2  | 2  | 0  | 1  | 4  | 3  | 5  | 0  | 0  | 0  | 7  | 5  | 2  | 0  | 0  | 0  | 3  | 4  | 1  | 0  | 0  | 0 |
| ENSP00000265089,ENSP000 | ENSG00000113719 | EGHC1        | 14  | 1  | 0  | 0  | 0  | 0  | 0  | 0  | 1  | 1  | 1  | 1  | 0  | 0  | 0  | 0  | 0  | 1  | 0  | 0  | 0  | 0  | 0  | 0  | 1  | 1  | 2  | 1  | 0  | 2  | 1  | 0 |
| ENSP00000265097,ENSP000 | ENSG00000170089 | WDR70        | 46  | 3  | 1  | 2  | 2  | 0  | 0  | 1  | 0  | 1  | 5  | 0  | 0  | 1  | 0  | 0  | 0  | 1  | 1  | 1  | 1  | 1  | 4  | 0  | 2  | 5  | 3  | 1  | 4  | 3  | 3  |   |
| ENSP00000265107         | ENSG00000082069 | RAI14        | 80  | 2  | 3  | 1  | 3  | 1  | 4  | 3  | 0  | 2  | 1  | 2  | 1  | 2  | 4  | 2  | 1  | 4  | 2  | 4  | 3  | 2  | 4  | 6  | 2  | 3  | 3  | 2  | 4  | 5  | 4  |   |
| ENSP00000265109,ENSP000 | ENSG00000039560 | TARS         | 48  | 1  | 2  | 3  | 0  | 0  | 1  | 0  | 0  | 0  | 1  | 0  | 2  | 2  | 0  | 4  | 3  | 3  | 2  | 2  | 2  | 1  | 5  | 1  | 5  | 1  | 0  | 1  | 2  | 1  | 3  |   |
| ENSP00000265112,ENSP000 | ENSG00000113407 | SLC1A3       | 690 | 30 | 23 | 19 | 28 | 30 | 33 | 27 | 11 | 19 | 12 | 1  | 9  | 21 | 20 | 22 | 22 | 33 | 21 | 22 | 35 | 23 | 25 | 12 | 17 | 42 | 32 | 18 | 29 | 29 | 25 |   |
| ENSP00000265113,ENSP000 | ENSG00000079215 | TNC          | 13  | 5  | 3  | 3  | 0  | 0  | 0  | 0  | 0  | 0  | 0  | 0  | 0  | 0  | 0  | 0  | 0  | 0  | 1  | 0  | 0  | 0  | 1  | 0  | 0  | 0  | 0  | 0  | 0  | 0  | 0  |   |
| ENSP00000265131,ENSP000 | ENSG00000041982 | COBL         | 25  | 0  | 0  | 0  | 10 | 7  | 8  | 0  | 0  | 0  | 0  | 0  | 0  | 0  | 0  | 0  | 0  | 0  | 0  | 0  | 0  | 0  | 0  | 0  | 0  | 0  | 0  | 0  | 0  | 0  | 0  |   |
| ENSP00000265136,ENSP000 | ENSG00000106078 | CENPE        | 16  | 1  | 2  | 4  | 0  | 0  | 1  | 0  | 0  | 0  | 1  | 1  | 0  | 0  | 1  | 1  | 0  | 0  | 0  | 1  | 1  | 1  | 1  | 0  | 1  | 0  | 0  | 0  | 0  | 0  | 0  |   |
| ENSP00000265148,ENSP000 | ENSG00000138778 | INTS12       | 49  | 3  | 2  | 1  | 3  | 1  | 4  | 1  | 0  | 2  | 4  | 2  | 1  | 2  | 0  | 0  | 3  | 4  | 1  | 2  | 0  | 1  | 0  | 0  | 0  | 4  | 1  | 2  | 2  | 2  | 1  |   |
| ENSP00000265150,ENSP000 | ENSG00000138785 | CASP6        | 37  | 1  | 1  | 1  | 1  | 1  | 2  | 2  | 0  | 1  | 3  | 1  | 2  | 1  | 1  | 1  | 1  | 3  | 0  | 1  | 2  | 0  | 1  | 1  | 2  | 1  | 2  | 0  | 1  | 2  | 1  |   |
| ENSP00000265164         | ENSG00000138794 | HADH         | 77  | 3  | 3  | 3  | 4  | 3  | 3  | 3  | 1  | 1  | 1  | 0  | 0  | 1  | 0  | 1  | 3  | 1  | 2  | 4  | 2  | 2  | 3  | 1  | 1  | 7  | 10 | 7  | 2  | 2  | 3  |   |
| ENSP00000265168_rs17550 | ENSG00000138796 | PAPSS1       | 215 | 4  | 4  | 2  | 5  | 10 | 7  | 10 | 12 | 12 | 5  | 8  | 2  | 4  | 8  | 4  | 2  | 6  | 3  | 10 | 8  | 5  | 9  | 11 | 13 | 6  | 13 | 11 | 8  | 10 | 3  |   |
| ENSP00000265174         | ENSG00000138801 | SEC24B       | 231 | 10 | 8  | 7  | 4  | 7  | 7  | 4  | 4  | 3  | 7  | 1  | 2  | 9  | 3  | 7  | 17 | 16 | 10 | 4  | 6  | 8  | 5  | 5  | 3  | 15 | 16 | 10 | 13 | 11 | 9  |   |
| ENSP00000265175,ENSP000 | ENSG00000138802 | MCM8         | 23  | 0  | 1  | 0  | 1  | 1  | 1  | 1  | 0  | 2  | 0  | 0  | 0  | 0  | 0  | 1  | 0  | 0  | 2  | 0  | 1  | 1  | 0  | 1  | 1  | 1  | 2  | 1  | 0  | 2  | 2  |   |
| ENSP00000265187,ENSP000 | ENSG00000125885 | SIL1         | 50  | 1  | 0  | 3  | 1  | 1  | 2  | 0  | 0  | 5  | 6  | 0  | 1  | 0  | 0  | 2  | 2  | 0  | 2  | 1  | 1  | 0  | 4  | 0  | 4  | 2  | 2  | 3  | 5  | 1  | 1  |   |
| ENSP00000265195,ENSP000 | ENSG00000128075 | MRPL22       | 35  | 2  | 1  | 0  | 2  | 2  | 1  | 1  | 0  | 0  | 1  | 0  | 0  | 2  | 0  | 2  | 1  | 2  | 1  | 4  | 3  | 1  | 2  | 1  | 0  | 0  | 0  | 0  | 2  | 3  | 1  |   |
| ENSP00000265229,ENSP000 | ENSG00000088215 | IQCG         | 65  | 2  | 1  | 2  | 3  | 2  | 3  | 4  | 0  | 2  | 4  | 0  | 0  | 1  | 0  | 1  | 3  | 3  | 3  | 2  | 3  | 2  | 5  | 0  | 2  | 5  | 4  | 1  | 2  | 3  | 2  |   |
| ENSP00000265239         | ENSG00000114473 | LSG1         | 56  | 1  | 3  | 1  | 1  | 3  | 1  | 2  | 3  | 1  | 0  | 0  | 0  | 3  | 1  | 2  | 2  | 0  | 1  | 2  | 2  | 4  | 2  | 2  | 3  | 3  | 3  | 3  | 3  | 1  | 3  |   |
| ENSP00000265245,ENSP000 | ENSG00000041802 | NIT2         | 97  | 3  | 1  | 2  | 5  | 4  | 6  | 4  | 1  | 1  | 3  | 2  | 5  | 4  | 2  | 1  | 6  | 4  | 4  | 4  | 4  | 2  | 4  | 3  | 2  | 5  | 4  | 4  | 1  | 5  | 2  |   |
| ENSP00000265259,ENSP000 | ENSG00000114021 | PCNP6        | 134 | 4  | 2  | 5  | 4  | 8  | 5  | 6  | 3  | 3  | 3  | 1  | 2  | 2  | 2  | 2  | 2  | 4  | 5  | 3  | 6  | 5  | 4  | 2  | 4  | 9  | 9  | 6  | 10 | 8  | 5  |   |
| ENSP00000265260         | ENSG00000088154 | RPL24P, RPL2 | 80  | 3  | 3  | 6  | 4  | 3  | 3  | 3  | 2  | 4  | 1  | 1  | 1  | 2  | 2  | 2  | 2  | 1  | 3  | 3  | 1  | 5  | 0  | 3  | 2  | 2  | 4  | 3  | 3  | 3  | 3  |   |
| ENSP00000265264,ENSP000 | ENSG00000114391 | RBMT27       | 158 | 6  | 7  | 6  | 1  | 8  | 4  | 4  | 4  | 4  | 5  | 4  | 4  | 8  | 4  | 4  | 8  | 10 | 6  | 6  | 4  | 3  | 6  | 2  | 1  | 5  | 10 | 7  | 5  | 6  | 4  |   |
| ENSP00000265271,ENSP000 | ENSG00000091009 | CCDC99       | 100 | 4  | 4  | 3  | 3  | 1  | 2  | 3  | 2  | 3  | 7  | 6  | 2  | 1  | 4  | 3  | 3  | 3  | 3  | 5  | 4  | 2  | 7  | 6  | 6  | 4  | 3  | 1  | 2  | 2  | 1  |   |
| ENSP00000265293,ENSP000 | ENSG00000113645 | WVC1         | 12  | 0  | 0  | 0  | 0  | 2  | 1  | 3  | 1  | 0  | 0  | 0  | 0  | 0  | 0  | 0  | 0  | 1  | 0  | 0  | 1  | 1  | 0  | 0  | 0  | 2  | 0  | 0  | 0  | 0  | 0  |   |
| ENSP00000265295,ENSP000 | ENSG00000040275 | POR          | 17  | 1  | 4  | 2  | 0  | 1  | 0  | 1  | 0  | 0  | 0  | 1  | 0  | 0  | 1  | 0  | 0  | 0  | 1  | 0  |    |    |    |    |    |    |    |    |    |    |    |   |

|                                  |                  |           |     |    |    |    |    |    |    |    |    |    |    |    |    |    |    |    |    |    |    |    |    |    |    |    |    |    |    |    |    |    |    |
|----------------------------------|------------------|-----------|-----|----|----|----|----|----|----|----|----|----|----|----|----|----|----|----|----|----|----|----|----|----|----|----|----|----|----|----|----|----|----|
| ENSP00000265827,ENSP000          | ENSG000000408405 | ZNF800    | 28  | 1  | 1  | 1  | 0  | 2  | 1  | 0  | 1  | 2  | 3  | 0  | 0  | 1  | 0  | 1  | 0  | 1  | 0  | 0  | 1  | 2  | 3  | 1  | 2  | 2  | 1  | 0  | 1  | 0  | 0  |
| ENSP00000265836                  | ENSG00000110660  | SLC35F2   | 18  | 1  | 1  | 1  | 0  | 0  | 0  | 1  | 2  | 1  | 2  | 0  | 0  | 1  | 0  | 1  | 1  | 0  | 0  | 1  | 1  | 2  | 0  | 0  | 0  | 0  | 1  | 0  | 1  | 0  | 0  |
| ENSP00000265838,ENSP000          | ENSG00000075239  | ACAT1     | 483 | 16 | 24 | 14 | 11 | 13 | 13 | 11 | 8  | 8  | 19 | 18 | 17 | 11 | 14 | 8  | 13 | 18 | 11 | 14 | 18 | 18 | 21 | 24 | 20 | 18 | 25 | 21 | 22 | 17 | 18 |
| ENSP00000265843,ENSP000          | ENSG000000110723 | ADPH1     | 10  | 0  | 0  | 0  | 1  | 0  | 1  | 1  | 1  | 0  | 1  | 0  | 0  | 0  | 0  | 1  | 0  | 0  | 0  | 2  | 1  | 1  | 0  | 0  | 0  | 0  | 0  | 0  | 0  | 0  |    |
| ENSP00000265846,ENSP000          | ENSG000000107603 | EXPA5     | 27  | 0  | 0  | 0  | 2  | 1  | 2  | 7  | 1  | 2  | 0  | 0  | 0  | 0  | 0  | 0  | 1  | 1  | 2  | 0  | 0  | 1  | 1  | 2  | 2  | 1  | 1  | 0  | 0  | 0  |    |
| ENSP00000265854,ENSP000          | ENSG000000002822 | MDA111    | 127 | 6  | 6  | 4  | 4  | 3  | 3  | 5  | 5  | 3  | 2  | 4  | 3  | 3  | 2  | 1  | 4  | 3  | 4  | 5  | 7  | 3  | 8  | 8  | 5  | 4  | 7  | 1  | 6  | 4  |    |
| ENSP00000265857,ENSP000          | ENSG00000105972  | C7orf20   | 70  | 5  | 4  | 4  | 2  | 2  | 1  | 3  | 1  | 1  | 2  | 0  | 1  | 1  | 0  | 3  | 3  | 4  | 3  | 2  | 4  | 5  | 0  | 0  | 0  | 3  | 2  | 2  | 5  | 2  |    |
| ENSP00000265866,ENSP000          | ENSG000000096746 | HNRNP3    | 342 | 21 | 6  | 16 | 7  | 12 | 8  | 5  | 2  | 9  | 25 | 6  | 11 | 9  | 5  | 13 | 6  | 17 | 9  | 13 | 14 | 13 | 15 | 10 | 13 | 14 | 13 | 8  | 17 | 13 |    |
| ENSP00000265872                  | ENSG00000060339  | CCAR1     | 200 | 8  | 13 | 5  | 5  | 7  | 4  | 4  | 10 | 7  | 7  | 8  | 8  | 6  | 8  | 6  | 4  | 5  | 3  | 8  | 6  | 4  | 12 | 10 | 4  | 6  | 6  | 6  | 7  | 8  |    |
| ENSP00000265881                  | ENSG00000076043  | REXO2     | 109 | 9  | 5  | 4  | 1  | 2  | 1  | 2  | 3  | 3  | 5  | 3  | 3  | 1  | 3  | 3  | 3  | 4  | 3  | 4  | 4  | 3  | 5  | 1  | 5  | 5  | 4  | 5  | 6  | 3  |    |
| ENSP00000265896,ENSP000          | ENSG00000104549  | SQLE      | 20  | 3  | 1  | 1  | 0  | 0  | 0  | 0  | 1  | 2  | 0  | 0  | 0  | 0  | 1  | 1  | 1  | 0  | 1  | 0  | 1  | 1  | 1  | 0  | 0  | 2  | 1  | 0  | 2  | 1  |    |
| ENSP00000265963_T503M            | ENSG00000110768  | GTF2H1    | 24  | 0  | 0  | 1  | 0  | 0  | 0  | 2  | 0  | 3  | 1  | 0  | 1  | 0  | 0  | 1  | 0  | 1  | 1  | 0  | 1  | 1  | 0  | 0  | 1  | 0  | 0  | 2  | 2  | 3  |    |
| ENSP00000265970,ENSP000          | ENSG000000114405 | PIK3C2A   | 104 | 11 | 4  | 6  | 4  | 0  | 1  | 3  | 3  | 5  | 1  | 1  | 1  | 2  | 4  | 5  | 1  | 1  | 2  | 7  | 5  | 6  | 4  | 2  | 2  | 3  | 4  | 0  | 6  | 4  |    |
| ENSP00000265978,ENSP000          | ENSG000000051009 | FAM160A2  | 21  | 1  | 1  | 0  | 2  | 0  | 0  | 3  | 1  | 0  | 1  | 0  | 0  | 2  | 0  | 0  | 0  | 0  | 2  | 0  | 0  | 0  | 0  | 0  | 1  | 3  | 3  | 0  | 0  | 1  |    |
| ENSP00000265986                  | ENSG00000119912  | IDF       | 362 | 20 | 12 | 19 | 12 | 17 | 16 | 12 | 8  | 11 | 7  | 1  | 4  | 10 | 6  | 12 | 15 | 16 | 17 | 17 | 13 | 11 | 14 | 4  | 4  | 26 | 19 | 14 | 12 | 6  |    |
| ENSP00000265990,ENSP000          | ENSG000000095564 | BTA1F1    | 64  | 1  | 1  | 1  | 2  | 2  | 1  | 3  | 0  | 1  | 1  | 0  | 1  | 5  | 0  | 3  | 4  | 4  | 3  | 3  | 3  | 1  | 2  | 1  | 3  | 2  | 4  | 1  | 3  | 5  |    |
| ENSP00000266000,ENSP000          | ENSG000000206206 | FGD4      | 36  | 1  | 0  | 0  | 0  | 0  | 0  | 1  | 0  | 0  | 3  | 0  | 0  | 2  | 2  | 0  | 2  | 3  | 2  | 0  | 1  | 0  | 4  | 2  | 3  | 0  | 2  | 0  | 1  | 4  |    |
| ENSP00000266022,ENSP000          | ENSG000000004534 | RBM6      | 116 | 5  | 6  | 8  | 0  | 0  | 0  | 2  | 2  | 0  | 3  | 5  | 2  | 1  | 2  | 2  | 4  | 4  | 6  | 11 | 4  | 9  | 6  | 6  | 5  | 1  | 3  | 1  | 2  | 11 |    |
| ENSP00000266068,ENSP000          | ENSG000000101216 | GMEB2     | 17  | 1  | 0  | 1  | 1  | 0  | 0  | 0  | 0  | 0  | 1  | 0  | 0  | 1  | 0  | 2  | 1  | 1  | 3  | 0  | 0  | 0  | 0  | 0  | 1  | 2  | 0  | 0  | 0  | 1  |    |
| ENSP00000266069                  | ENSG00000101193  | C2orf111  | 55  | 3  | 1  | 2  | 2  | 1  | 2  | 1  | 1  | 1  | 1  | 0  | 2  | 3  | 2  | 3  | 5  | 2  | 3  | 2  | 4  | 2  | 0  | 0  | 2  | 2  | 1  | 2  | 2  | 1  |    |
| ENSP00000266070_rs18838,ENSP000  | ENSG000000101191 | DID01     | 219 | 7  | 5  | 6  | 6  | 5  | 5  | 14 | 10 | 16 | 11 | 11 | 9  | 4  | 5  | 7  | 2  | 7  | 3  | 12 | 11 | 6  | 9  | 7  | 7  | 6  | 8  | 5  | 8  | 3  |    |
| ENSP00000266070_rs91014f,ENSP000 | ENSG000000101191 | DID01     | 253 | 9  | 7  | 7  | 7  | 5  | 6  | 16 | 13 | 17 | 12 | 15 | 11 | 4  | 6  | 7  | 2  | 8  | 3  | 14 | 13 | 8  | 10 | 9  | 8  | 7  | 10 | 6  | 7  | 3  |    |
| ENSP00000266079,ENSP000          | ENSG000000101161 | PRPF6     | 401 | 23 | 22 | 13 | 12 | 12 | 8  | 12 | 11 | 11 | 19 | 12 | 13 | 10 | 16 | 10 | 6  | 14 | 12 | 13 | 13 | 11 | 19 | 18 | 12 | 16 | 14 | 10 | 14 | 16 |    |
| ENSP00000266088                  | ENSG00000100170  | SLCSA1    | 10  | 0  | 0  | 0  | 1  | 1  | 1  | 3  | 1  | 1  | 0  | 0  | 0  | 0  | 0  | 0  | 0  | 0  | 0  | 0  | 0  | 1  | 0  | 0  | 1  | 0  | 0  | 0  | 0  | 0  |    |
| ENSP00000266119,ENSP000          | ENSG000000112448 | TRIM27    | 40  | 0  | 2  | 0  | 1  | 2  | 1  | 3  | 1  | 0  | 1  | 0  | 1  | 0  | 0  | 2  | 2  | 1  | 0  | 1  | 1  | 3  | 2  | 0  | 2  | 3  | 0  | 3  | 2  | 1  |    |
| ENSP00000266126                  | ENSG00000119718  | E1F2B2    | 52  | 3  | 3  | 0  | 2  | 2  | 2  | 0  | 1  | 1  | 0  | 1  | 0  | 1  | 4  | 1  | 4  | 2  | 1  | 2  | 2  | 2  | 2  | 1  | 0  | 1  | 3  | 2  | 1  | 2  |    |
| ENSP00000266263                  | ENSG00000100010  | 44        | 1   | 1  | 0  | 1  | 3  | 2  | 2  | 0  | 0  | 0  | 0  | 1  | 2  | 1  | 2  | 2  | 1  | 1  | 3  | 3  | 2  | 2  | 3  | 2  | 3  | 2  | 0  | 1  | 0  | 2  |    |
| ENSP00000266481                  | ENSG00000008740  | DNM1L     | 234 | 16 | 11 | 10 | 5  | 7  | 5  | 6  | 9  | 6  | 7  | 1  | 1  | 6  | 3  | 4  | 11 | 11 | 7  | 5  | 8  | 7  | 16 | 5  | 5  | 11 | 6  | 5  | 14 | 12 |    |
| ENSP00000266482,ENSP000          | ENSG000000139132 | FGD4      | 26  | 1  | 0  | 0  | 1  | 1  | 1  | 3  | 1  | 3  | 0  | 0  | 1  | 0  | 0  | 0  | 0  | 0  | 0  | 2  | 1  | 0  | 2  | 3  | 3  | 1  | 1  | 1  | 0  | 0  |    |
| ENSP00000266517,ENSP000          | ENSG000000139163 | ETN1K     | 17  | 3  | 0  | 0  | 1  | 1  | 1  | 1  | 0  | 1  | 0  | 0  | 0  | 0  | 0  | 0  | 0  | 0  | 1  | 0  | 1  | 0  | 0  | 0  | 1  | 0  | 0  | 0  | 3  | 1  |    |
| ENSP00000266542,ENSP000          | ENSG000000139178 | CTRL      | 10  | 0  | 0  | 0  | 1  | 0  | 1  | 0  | 0  | 0  | 0  | 1  | 0  | 0  | 0  | 0  | 1  | 0  | 1  | 0  | 0  | 0  | 1  | 0  | 0  | 0  | 2  | 1  | 0  | 0  |    |
| ENSP00000266544                  | ENSG00000139180  | NDUFA9    | 63  | 4  | 1  | 2  | 2  | 2  | 2  | 1  | 2  | 2  | 1  | 0  | 2  | 2  | 0  | 1  | 6  | 3  | 3  | 1  | 1  | 3  | 2  | 1  | 4  | 2  | 3  | 3  | 2  | 3  |    |
| ENSP00000266563,ENSP000          | ENSG000000139197 | PEX5      | 21  | 1  | 0  | 2  | 0  | 0  | 1  | 1  | 0  | 2  | 0  | 0  | 0  | 0  | 0  | 1  | 0  | 1  | 0  | 1  | 0  | 0  | 0  | 0  | 0  | 1  | 1  | 1  | 2  | 1  |    |
| ENSP00000266589,ENSP000          | ENSG000000139218 | SRSF2IP   | 89  | 10 | 8  | 1  | 3  | 0  | 1  | 2  | 2  | 0  | 5  | 4  | 5  | 3  | 5  | 5  | 0  | 0  | 0  | 3  | 5  | 2  | 6  | 5  | 6  | 4  | 0  | 0  | 0  | 2  | 2  |
| ENSP00000266604,ENSP000          | ENSG000000139233 | LLPH      | 93  | 1  | 1  | 3  | 3  | 1  | 2  | 3  | 0  | 2  | 4  | 0  | 4  | 3  | 5  | 0  | 5  | 4  | 6  | 4  | 2  | 4  | 5  | 2  | 4  | 4  | 4  | 3  | 5  | 3  |    |
| ENSP00000266679                  | ENSG00000111605  | CP5F6     | 133 | 5  | 4  | 4  | 4  | 2  | 3  | 5  | 3  | 4  | 5  | 6  | 8  | 1  | 3  | 2  | 1  | 7  | 4  | 7  | 5  | 5  | 6  | 5  | 3  | 3  | 5  | 6  | 5  | 5  |    |
| ENSP00000266712                  | ENSG00000139324  | TMTC3     | 35  | 3  | 1  | 3  | 1  | 0  | 1  | 2  | 1  | 0  | 1  | 0  | 0  | 2  | 1  | 1  | 2  | 2  | 2  | 1  | 2  | 2  | 2  | 0  | 1  | 0  | 2  | 0  | 0  | 1  | 1  |
| ENSP00000266732,ENSP000          | ENSG000000120802 | TMPO      | 561 | 20 | 19 | 19 | 18 | 23 | 14 | 14 | 19 | 12 | 23 | 11 | 15 | 21 | 16 | 14 | 22 | 16 | 12 | 18 | 23 | 21 | 27 | 22 | 22 | 16 | 19 | 13 | 30 | 23 |    |
| ENSP00000266732_rs17459,ENSP000  | ENSG000000120802 | TMPO      | 530 | 18 | 18 | 17 | 16 | 22 | 14 | 14 | 19 | 10 | 27 | 12 | 17 | 19 | 15 | 12 | 21 | 16 | 12 | 16 | 20 | 19 | 24 | 20 | 20 | 16 | 19 | 13 | 27 | 20 |    |
| ENSP00000266735                  | ENSG00000139343  | SNRPF     | 34  | 3  | 3  | 0  | 0  | 0  | 0  | 0  | 0  | 0  | 0  | 2  | 0  | 0  | 1  | 1  | 0  | 1  | 0  | 0  | 3  | 0  | 7  | 3  | 0  | 4  | 0  | 0  | 2  | 3  | 0  |
| ENSP00000266742                  | ENSG00000139350  | NEDM1     | 28  | 1  | 0  | 0  | 3  | 2  | 2  | 0  | 0  | 1  | 0  | 0  | 0  | 1  | 0  | 1  | 0  | 2  | 2  | 1  | 1  | 1  | 3  | 0  | 0  | 1  | 3  | 0  | 0  | 0  | 0  |
| ENSP00000266839,ENSP000          | ENSG000000139428 | MMAB      | 50  | 1  | 0  | 4  | 3  | 4  | 5  | 3  | 0  | 3  | 1  | 0  | 0  | 1  | 0  | 2  | 1  | 1  | 1  | 2  | 0  | 1  | 0  | 2  | 1  | 4  | 3  | 4  | 2  | 0  |    |
| ENSP00000266839_M202L            | ENSG000000139428 | MMAB      | 23  | 1  | 0  | 3  | 0  | 0  | 1  | 1  | 1  | 0  | 2  | 2  | 0  | 3  | 0  | 0  | 1  | 0  | 0  | 0  | 0  | 0  | 0  | 2  | 1  | 1  | 0  | 2  | 1  | 0  |    |
| ENSP00000266971,ENSP000          | ENSG000000139531 | SUOX      | 10  | 2  | 1  | 2  | 0  | 0  | 0  | 0  | 0  | 0  | 0  | 0  | 0  | 0  | 1  | 0  | 0  | 1  | 1  | 0  | 0  | 0  | 0  | 0  | 0  | 0  | 0  | 1  | 0  | 0  |    |
| ENSP00000267064,ENSP000          | ENSG000000139613 | SMARCC2   | 172 | 2  | 2  | 4  | 3  | 4  | 2  | 4  | 3  | 10 | 17 | 5  | 7  | 1  | 3  | 9  | 6  | 5  | 7  | 8  | 7  | 9  | 4  | 4  | 7  | 7  | 7  | 9  | 3  | 6  |    |
| ENSP00000267101,ENSP000          | ENSG000000065361 | ERBB3     | 10  | 0  | 1  | 0  | 0  | 0  | 1  | 1  | 0  | 0  | 0  | 0  | 0  | 1  | 1  | 0  | 1  | 0  | 1  | 0  | 0  | 2  | 0  | 0  | 1  | 0  | 0  | 0  | 0  | 0  | 0  |
| ENSP00000267103,ENSP000          | ENSG000000139637 | CL2orf110 | 132 | 3  | 5  | 3  | 3  | 7  | 3  | 3  | 3  | 3  | 3  | 9  | 2  | 3  | 4  | 3  | 5  | 7  | 8  | 5  | 3  | 3  | 5  | 4  | 4  | 6  | 7  | 6  | 5  | 4  |    |
| ENSP00000267119                  | ENSG00000139648  | KRT71     | 26  | 0  | 0  | 2  | 1  | 0  | 0  | 1  | 0  | 1  | 3  | 2  | 0  | 1  | 1  | 0  | 2  | 0  | 2  | 1  | 0  | 2  | 1  | 0  | 2  | 1  | 3  | 1  | 0  | 1  | 0  |
| ENSP00000267163                  | ENSG00000139687  | RB1       | 56  | 1  | 0  | 0  | 4  | 3  | 2  | 2  | 2  | 2  | 6  | 1  | 0  | 1  | 2  | 2  | 1  | 0  | 1  | 3  | 2  | 0  | 3  | 1  | 1  | 4  | 2  | 0  | 4  | 4  | 2  |
| ENSP00000267169,ENSP000          | ENSG000000184047 | DIALBLO   | 101 | 5  | 5  | 2  | 3  | 2  | 2  | 5  | 3  | 2  | 6  | 3  | 2  | 2  | 5  | 4  | 1  | 2  | 1  | 5  | 5  | 1  | 6  | 6  | 3  | 4  | 4  | 2  | 5  | 3  | 2  |
| ENSP00000267176,ENSP000          | ENSG000000139697 | SBN01     | 76  | 5  | 4  | 5  | 6  | 2  | 1  | 4  | 0  | 0  | 0  | 1  | 0  | 4  | 0  | 3  | 5  | 2  | 1  | 5  | 6  | 3  | 1  | 2  | 1  | 0  | 0  | 0  | 2  | 10 |    |
| ENSP00000267199,ENSP000          | ENSG000000139719 | VPS33A    | 18  | 0  | 1  | 1  |    |    |    |    |    |    |    |    |    |    |    |    |    |    |    |    |    |    |    |    |    |    |    |    |    |    |    |

|                                                                            |                  |                 |     |    |    |    |    |    |    |    |    |    |    |   |    |    |    |    |    |    |    |    |    |    |    |    |    |    |    |    |    |    |    |   |
|----------------------------------------------------------------------------|------------------|-----------------|-----|----|----|----|----|----|----|----|----|----|----|---|----|----|----|----|----|----|----|----|----|----|----|----|----|----|----|----|----|----|----|---|
| ENSP00000269137,ENSP00000269137,ENSP00000269137                            | SS18             | 19              | 0   | 0  | 1  | 0  | 0  | 0  | 0  | 0  | 1  | 0  | 0  | 1 | 2  | 0  | 1  | 1  | 1  | 0  | 1  | 0  | 1  | 0  | 0  | 1  | 2  | 2  | 1  | 1  | 0  | 2  |    |   |
| ENSP00000269143                                                            | ENSG000000141380 | AFG3L2          | 257 | 9  | 2  | 5  | 2  | 3  | 8  | 12 | 6  | 10 | 13 | 1 | 10 | 5  | 3  | 11 | 8  | 4  | 11 | 8  | 3  | 8  | 22 | 5  | 17 | 9  | 7  | 12 | 21 | 7  | 15 |   |
| ENSP00000269195,ENSP00000269195,ENSP00000269195                            | ENSG000000141429 | GALTNT1         | 45  | 1  | 0  | 0  | 1  | 3  | 0  | 0  | 1  | 1  | 0  | 0 | 0  | 5  | 2  | 4  | 0  | 2  | 2  | 2  | 1  | 0  | 4  | 2  | 1  | 7  | 2  | 2  | 0  | 0  | 1  |   |
| ENSP00000269216,ENSP00000269216,ENSP00000269216                            | ENSG000000141448 | GAT6A           | 37  | 2  | 6  | 3  | 1  | 1  | 0  | 1  | 2  | 1  | 0  | 0 | 0  | 1  | 0  | 2  | 0  | 0  | 0  | 0  | 3  | 2  | 1  | 3  | 2  | 0  | 5  | 1  | 0  | 0  | 0  |   |
| ENSP00000269221,ENSP00000269221,ENSP00000269221                            | ENSG000000141452 | CI8orf8         | 32  | 0  | 0  | 0  | 2  | 1  | 2  | 1  | 0  | 0  | 0  | 1 | 1  | 1  | 0  | 1  | 0  | 1  | 1  | 2  | 1  | 0  | 1  | 1  | 0  | 1  | 3  | 1  | 3  | 3  | 3  |   |
| ENSP00000269228,ENSP00000269228,ENSP00000269228                            | ENSG000000141458 | NPC1            | 31  | 2  | 0  | 1  | 0  | 0  | 1  | 1  | 1  | 2  | 2  | 1 | 1  | 0  | 0  | 0  | 1  | 2  | 2  | 0  | 1  | 0  | 6  | 0  | 3  | 1  | 0  | 0  | 3  | 0  | 0  |   |
| ENSP00000269230,ENSP00000269230,ENSP00000269230                            | ENSG000000141456 | PULP1           | 54  | 1  | 2  | 1  | 1  | 1  | 1  | 0  | 1  | 0  | 6  | 3 | 1  | 1  | 1  | 1  | 1  | 0  | 0  | 1  | 2  | 3  | 2  | 2  | 5  | 2  | 1  | 3  | 5  | 0  | 6  |   |
| ENSP00000269243_R1732W,ENSP00000269243_R1732W,ENSP00000269243_R1732W       | ENSG000000133026 | MYH10           | 453 | 54 | 45 | 38 | 0  | 3  | 6  | 3  | 0  | 3  | 11 | 3 | 7  | 15 | 12 | 18 | 23 | 25 | 24 | 34 | 42 | 32 | 17 | 7  | 9  | 3  | 4  | 4  | 6  | 0  | 5  |   |
| ENSP00000269260,ENSP00000269260,ENSP00000269260                            | ENSG000000141480 | ARRB2           | 21  | 1  | 0  | 0  | 1  | 0  | 1  | 0  | 0  | 0  | 0  | 0 | 0  | 0  | 1  | 0  | 1  | 2  | 1  | 0  | 0  | 1  | 0  | 0  | 0  | 1  | 0  | 0  | 5  | 2  | 3  |   |
| ENSP00000269296,ENSP00000269296,ENSP00000269296                            | ENSG000000141503 | MINK1           | 26  | 1  | 1  | 1  | 3  | 0  | 1  | 0  | 0  | 0  | 0  | 1 | 0  | 2  | 2  | 0  | 1  | 0  | 1  | 2  | 1  | 0  | 1  | 1  | 0  | 0  | 1  | 2  | 3  | 0  | 1  | 0 |
| ENSP00000269305_P3095,rs,ENSP00000269305_P3095,rs,ENSP00000269305_P3095,rs | ENSG000000141510 | TP53            | 18  | 0  | 0  | 0  | 0  | 0  | 0  | 1  | 6  | 2  | 3  | 2 | 2  | 0  | 0  | 1  | 0  | 0  | 0  | 0  | 1  | 0  | 0  | 0  | 0  | 0  | 0  | 0  | 0  | 0  | 0  | 0 |
| ENSP00000269321,ENSP00000269321,ENSP00000269321                            | ENSG00000015642  |                 | 320 | 12 | 13 | 6  | 8  | 20 | 10 | 5  | 10 | 5  | 12 | 6 | 5  | 6  | 7  | 8  | 13 | 12 | 11 | 9  | 13 | 7  | 13 | 12 | 6  | 20 | 20 | 11 | 15 | 16 | 9  |   |
| ENSP00000269349                                                            | ENSG000000141543 | EIF4A3          | 564 | 25 | 15 | 15 | 14 | 21 | 11 | 15 | 5  | 11 | 26 | 8 | 17 | 19 | 13 | 19 | 27 | 19 | 19 | 26 | 25 | 19 | 25 | 20 | 14 | 27 | 24 | 16 | 28 | 23 | 18 |   |
| ENSP00000269349_V146I,ENSP00000269349_V146I,ENSP00000269349_V146I          | ENSG000000141543 | EIF4A3          | 531 | 21 | 15 | 13 | 12 | 21 | 10 | 14 | 5  | 10 | 24 | 8 | 16 | 18 | 13 | 18 | 26 | 18 | 17 | 26 | 25 | 20 | 23 | 20 | 13 | 24 | 22 | 15 | 25 | 22 | 17 |   |
| ENSP00000269385,ENSP00000269385,ENSP00000269385                            | ENSG000000141570 | CBX8            | 22  | 1  | 0  | 0  | 0  | 0  | 0  | 3  | 0  | 1  | 0  | 0 | 0  | 1  | 0  | 0  | 2  | 0  | 2  | 0  | 2  | 1  | 0  | 2  | 0  | 1  | 1  | 3  | 0  | 1  | 2  | 1 |
| ENSP00000269392,ENSP00000269392,ENSP00000269392                            | ENSG000000141577 | AZ1             | 40  | 2  | 0  | 0  | 0  | 1  | 1  | 0  | 0  | 0  | 1  | 1 | 2  | 2  | 1  | 1  | 0  | 2  | 1  | 5  | 8  | 2  | 2  | 0  | 1  | 2  | 1  | 3  | 0  | 0  | 0  | 0 |
| ENSP00000269397,ENSP00000269397,ENSP00000269397                            | ENSG000000141582 | CBX4            | 17  | 3  | 0  | 0  | 0  | 2  | 2  | 1  | 0  | 0  | 1  | 0 | 0  | 0  | 1  | 1  | 0  | 0  | 1  | 0  | 1  | 0  | 1  | 0  | 0  | 0  | 2  | 0  | 1  | 1  | 0  | 0 |
| ENSP00000269468,ENSP00000269468,ENSP00000269468                            | ENSG000000141644 | MBD1            | 25  | 1  | 0  | 1  | 1  | 0  | 0  | 0  | 0  | 1  | 1  | 0 | 0  | 0  | 1  | 0  | 0  | 1  | 0  | 1  | 1  | 2  | 2  | 3  | 1  | 0  | 2  | 1  | 3  | 0  | 2  |   |
| ENSP00000269554,ENSP00000269554,ENSP00000269554                            | ENSG000000141720 | PIP4K2B         | 32  | 1  | 1  | 0  | 4  | 1  | 0  | 2  | 2  | 0  | 2  | 1 | 1  | 1  | 3  | 0  | 2  | 2  | 2  | 1  | 1  | 0  | 0  | 1  | 0  | 0  | 2  | 1  | 1  | 0  | 0  | 0 |
| ENSP00000269571_rs11362I,ENSP00000269571_rs11362I,ENSP00000269571_rs11362I | ENSG000000141736 | ERBB2           | 18  | 1  | 1  | 0  | 0  | 0  | 0  | 1  | 3  | 0  | 0  | 0 | 0  | 0  | 0  | 1  | 0  | 0  | 0  | 1  | 1  | 2  | 2  | 2  | 1  | 1  | 0  | 0  | 0  | 1  | 0  | 0 |
| ENSP00000269576                                                            | ENSG000000186395 | KRT10           | 260 | 15 | 3  | 12 | 7  | 3  | 14 | 8  | 5  | 11 | 5  | 0 | 28 | 4  | 2  | 13 | 1  | 6  | 11 | 4  | 10 | 9  | 13 | 4  | 20 | 5  | 4  | 19 | 6  | 1  | 17 |   |
| ENSP00000269601                                                            | ENSG000000141759 | TXNL4A          | 87  | 2  | 1  | 1  | 2  | 2  | 2  | 3  | 1  | 1  | 4  | 0 | 3  | 3  | 0  | 4  | 6  | 3  | 4  | 4  | 4  | 4  | 7  | 3  | 4  | 3  | 6  | 0  | 3  | 2  | 5  |   |
| ENSP00000269701                                                            | ENSG000000105127 | AKAP8           | 132 | 10 | 3  | 3  | 4  | 0  | 3  | 2  | 4  | 1  | 9  | 3 | 2  | 2  | 4  | 3  | 3  | 3  | 5  | 2  | 7  | 4  | 13 | 6  | 5  | 10 | 6  | 3  | 8  | 2  | 2  |   |
| ENSP00000269778,ENSP00000269778,ENSP00000269778                            | ENSG000000141905 | NFIC            | 37  | 0  | 0  | 0  | 0  | 1  | 0  | 2  | 1  | 1  | 0  | 2 | 1  | 1  | 1  | 1  | 1  | 3  | 2  | 3  | 0  | 2  | 1  | 1  | 1  | 2  | 2  | 1  | 3  | 2  | 2  |   |
| ENSP00000269812,ENSP00000269812,ENSP00000269812                            | ENSG000000141934 | PPAP2C          | 41  | 1  | 0  | 0  | 2  | 4  | 1  | 3  | 2  | 3  | 0  | 0 | 0  | 0  | 0  | 3  | 1  | 1  | 2  | 1  | 1  | 1  | 2  | 0  | 2  | 6  | 1  | 3  | 0  | 0  | 1  |   |
| ENSP00000269814,ENSP00000269814,ENSP00000269814                            | ENSG000000175221 | MED16           | 47  | 2  | 0  | 2  | 1  | 1  | 1  | 3  | 0  | 1  | 1  | 0 | 2  | 2  | 2  | 0  | 2  | 3  | 3  | 1  | 1  | 3  | 3  | 2  | 2  | 1  | 1  | 0  | 1  | 2  | 4  |   |
| ENSP00000269886                                                            | ENSG000000141985 | SH3GL1          | 178 | 9  | 7  | 6  | 4  | 4  | 3  | 2  | 3  | 2  | 2  | 2 | 4  | 4  | 4  | 8  | 10 | 5  | 6  | 6  | 7  | 7  | 9  | 3  | 3  | 12 | 11 | 5  | 10 | 11 | 9  |   |
| ENSP00000269932,ENSP00000269932,ENSP00000269932                            | ENSG000000105676 | ARMC6           | 74  | 3  | 1  | 1  | 3  | 3  | 2  | 2  | 0  | 1  | 2  | 0 | 1  | 4  | 2  | 2  | 2  | 1  | 3  | 3  | 5  | 5  | 2  | 1  | 2  | 4  | 5  | 3  | 4  | 5  | 2  |   |
| ENSP00000269967,ENSP00000269967,ENSP00000269967                            | ENSG000000142039 | CDC97           | 23  | 1  | 1  | 1  | 1  | 1  | 0  | 2  | 1  | 0  | 1  | 1 | 1  | 1  | 0  | 0  | 0  | 0  | 1  | 1  | 0  | 1  | 0  | 2  | 1  | 0  | 1  | 0  | 2  | 1  | 0  |   |
| ENSP00000269980,ENSP00000269980,ENSP00000269980                            | ENSG000000142046 | BCKDHA          | 98  | 2  | 1  | 2  | 2  | 3  | 1  | 9  | 2  | 5  | 5  | 2 | 3  | 2  | 2  | 2  | 4  | 3  | 2  | 0  | 6  | 5  | 2  | 5  | 3  | 2  | 6  | 6  | 5  | 3  | 3  | 2 |
| ENSP00000270066                                                            | ENSG000000105771 | C19orf61        | 10  | 0  | 0  | 1  | 0  | 0  | 0  | 0  | 0  | 0  | 2  | 1 | 0  | 0  | 0  | 0  | 0  | 0  | 0  | 1  | 1  | 0  | 0  | 0  | 1  | 0  | 1  | 1  | 1  | 0  | 0  |   |
| ENSP00000270142                                                            | ENSG000000142186 | SDO1            | 255 | 6  | 7  | 3  | 9  | 8  | 5  | 5  | 10 | 3  | 7  | 8 | 5  | 7  | 10 | 5  | 9  | 7  | 6  | 14 | 13 | 6  | 7  | 10 | 2  | 14 | 26 | 9  | 14 | 12 | 8  |   |
| ENSP00000270176,ENSP00000270176,ENSP00000270176                            | ENSG000000142186 | CY11            | 106 | 5  | 9  | 5  | 5  | 2  | 1  | 5  | 4  | 2  | 3  | 3 | 1  | 4  | 6  | 2  | 4  | 4  | 0  | 2  | 7  | 2  | 7  | 2  | 4  | 2  | 4  | 7  | 1  | 0  | 5  | 5 |
| ENSP00000270190,ENSP00000270190,ENSP00000270190                            | ENSG000000142197 | DOPEY2          | 22  | 1  | 0  | 0  | 1  | 2  | 0  | 2  | 0  | 0  | 0  | 1 | 0  | 1  | 0  | 0  | 1  | 2  | 1  | 1  | 1  | 0  | 0  | 0  | 0  | 3  | 1  | 2  | 0  | 1  | 1  |   |
| ENSP00000270202,ENSP00000270202,ENSP00000270202                            | ENSG000000142208 | AKT1            | 51  | 3  | 0  | 0  | 2  | 2  | 2  | 2  | 0  | 0  | 1  | 0 | 1  | 2  | 1  | 2  | 8  | 2  | 3  | 2  | 1  | 2  | 1  | 0  | 1  | 4  | 1  | 1  | 2  | 0  | 5  |   |
| ENSP00000270225                                                            | ENSG000000142230 | SAE1            | 194 | 11 | 4  | 7  | 6  | 6  | 6  | 12 | 5  | 10 | 14 | 5 | 10 | 3  | 3  | 6  | 2  | 5  | 7  | 6  | 11 | 7  | 7  | 4  | 4  | 5  | 4  | 6  | 7  | 5  | 6  |   |
| ENSP00000270233,ENSP00000270233,ENSP00000270233                            | ENSG000000187244 | BCAM            | 142 | 14 | 14 | 13 | 0  | 0  | 0  | 0  | 0  | 0  | 6  | 6 | 9  | 8  | 8  | 5  | 2  | 6  | 4  | 10 | 11 | 10 | 1  | 1  | 1  | 0  | 0  | 0  | 4  | 5  | 4  |   |
| ENSP00000270279,ENSP00000270279,ENSP00000270279                            | ENSG000000142273 | CLBC            | 11  | 1  | 2  | 2  | 2  | 2  | 0  | 0  | 0  | 1  | 0  | 0 | 0  | 0  | 0  | 0  | 0  | 0  | 0  | 0  | 1  | 0  | 0  | 0  | 0  | 0  | 0  | 0  | 0  | 0  | 0  |   |
| ENSP00000270502,ENSP00000270502,ENSP00000270502                            | ENSG000000142444 | C19orf52        | 15  | 2  | 0  | 0  | 0  | 1  | 1  | 0  | 1  | 0  | 0  | 0 | 0  | 2  | 0  | 0  | 0  | 0  | 0  | 2  | 0  | 0  | 0  | 3  | 0  | 1  | 0  | 0  | 1  | 0  | 0  | 1 |
| ENSP00000270517,ENSP00000270517,ENSP00000270517                            | ENSG000000130159 | ECISIT          | 23  | 0  | 0  | 1  | 0  | 0  | 0  | 0  | 0  | 1  | 2  | 0 | 1  | 1  | 0  | 1  | 1  | 0  | 0  | 0  | 0  | 0  | 1  | 1  | 0  | 2  | 3  | 3  | 1  | 3  | 0  | 1 |
| ENSP00000270538,ENSP00000270538,ENSP00000270538                            | ENSG000000104980 | TIMM44          | 416 | 16 | 13 | 10 | 6  | 16 | 12 | 16 | 8  | 9  | 21 | 9 | 14 | 13 | 6  | 10 | 19 | 16 | 13 | 18 | 19 | 12 | 21 | 13 | 14 | 23 | 23 | 11 | 12 | 13 | 10 |   |
| ENSP00000270583,ENSP00000270583,ENSP00000270583                            | ENSG000000104731 | ENSP00000270583 | 11  | 0  | 1  | 1  | 0  | 1  | 0  | 0  | 0  | 1  | 0  | 0 | 0  | 0  | 0  | 1  | 0  | 1  | 0  | 0  | 0  | 0  | 1  | 1  | 0  | 1  | 0  | 0  | 0  | 0  | 0  | 1 |
| ENSP00000270586                                                            | ENSG000000142507 | PSMB6           | 82  | 5  | 1  | 2  | 1  | 3  | 4  | 2  | 1  | 3  | 3  | 1 | 2  | 1  | 1  | 4  | 3  | 3  | 6  | 3  | 3  | 3  | 4  | 0  | 2  | 5  | 4  | 4  | 3  | 2  | 3  |   |
| ENSP00000270625                                                            | ENSG000000142534 | RP511P5,RP51    | 270 | 13 | 5  | 6  | 3  | 9  | 11 | 8  | 8  | 8  | 10 | 4 | 4  | 12 | 6  | 11 | 8  | 11 | 15 | 7  | 10 | 11 | 8  | 5  | 8  | 18 | 8  | 9  | 17 | 8  | 9  |   |
| ENSP00000270634                                                            | ENSG000000142541 | RP13AP18,RP     | 310 | 16 | 9  | 7  | 13 | 14 | 4  | 13 | 5  | 8  | 9  | 9 | 4  | 11 | 11 | 9  | 16 | 12 | 8  | 16 | 10 | 10 | 10 | 8  | 5  | 16 | 16 | 10 | 12 | 10 | 9  |   |
| ENSP00000270637,ENSP00000270637,ENSP00000270637                            | ENSG000000142544 | ATPBD3          | 14  | 1  | 1  | 1  | 1  | 0  | 0  | 1  | 0  | 0  | 0  | 0 | 0  | 0  | 0  | 1  | 0  | 0  | 2  | 1  | 0  | 0  | 0  | 0  | 0  | 0  | 1  | 0  | 2  | 1  | 1  | 1 |
| ENSP00000270776,ENSP00000270776,ENSP00000270776                            | ENSG000000142657 | PGD             | 466 | 17 | 15 | 22 | 13 | 21 | 18 | 11 | 14 | 16 | 19 | 1 | 7  | 13 | 15 |    |    |    |    |    |    |    |    |    |    |    |    |    |    |    |    |   |

|                                           |                  |                 |     |    |    |    |    |    |    |    |    |    |    |    |    |    |    |    |    |    |    |    |    |    |    |    |    |    |    |    |    |    |    |   |   |   |
|-------------------------------------------|------------------|-----------------|-----|----|----|----|----|----|----|----|----|----|----|----|----|----|----|----|----|----|----|----|----|----|----|----|----|----|----|----|----|----|----|---|---|---|
| ENSP00000273179,ENSP0000                  | ENSG00000144677  | CTDSP1          | 10  | 0  | 0  | 0  | 0  | 0  | 0  | 1  | 0  | 0  | 1  | 0  | 2  | 1  | 0  | 1  | 0  | 0  | 0  | 0  | 1  | 0  | 0  | 0  | 0  | 0  | 0  | 1  | 2  | 0  | 0  |   |   |   |
| ENSP00000273221,ENSP0000                  | ENSG000000144711 | IOSEI1          | 47  | 0  | 2  | 2  | 0  | 2  | 2  | 1  | 3  | 2  | 1  | 1  | 1  | 2  | 2  | 1  | 1  | 1  | 3  | 3  | 2  | 2  | 2  | 1  | 1  | 3  | 1  | 2  | 2  | 0  | 0  |   |   |   |
| ENSP00000273258                           | ENSG000000144746 | ARLP615         | 109 | 4  | 1  | 6  | 1  | 3  | 3  | 2  | 2  | 7  | 4  | 0  | 1  | 2  | 0  | 6  | 4  | 3  | 4  | 2  | 3  | 5  | 8  | 2  | 8  | 7  | 6  | 6  | 4  | 2  | 3  |   |   |   |
| ENSP00000273308                           | ENSG000000144785 | CNPY2           | 214 | 10 | 5  | 6  | 5  | 5  | 3  | 6  | 6  | 7  | 11 | 6  | 7  | 2  | 10 | 7  | 5  | 8  | 4  | 9  | 7  | 9  | 13 | 8  | 7  | 7  | 8  | 7  | 12 | 9  | 5  |   |   |   |
| ENSP00000273356,ENSP0000                  | ENSG000000144824 | PHLDB2,PLCXK    | 64  | 11 | 6  | 1  | 0  | 0  | 0  | 0  | 0  | 0  | 6  | 7  | 4  | 3  | 2  | 3  | 3  | 2  | 2  | 3  | 1  | 2  | 2  | 0  | 0  | 0  | 0  | 0  | 0  | 0  | 0  |   |   |   |
| ENSP00000273359,ENSP0000                  | ENSG000000144827 | ABHD10          | 140 | 4  | 1  | 2  | 4  | 4  | 3  | 3  | 3  | 5  | 7  | 2  | 3  | 2  | 1  | 3  | 8  | 11 | 8  | 9  | 4  | 4  | 11 | 3  | 5  | 7  | 6  | 3  | 7  | 3  | 4  |   |   |   |
| ENSP00000273359_rs174291,ENSP0000         | ENSG000000144827 | ABHD10          | 113 | 5  | 1  | 2  | 3  | 4  | 3  | 2  | 3  | 4  | 5  | 2  | 3  | 2  | 1  | 3  | 7  | 6  | 6  | 3  | 3  | 8  | 2  | 4  | 6  | 5  | 3  | 5  | 3  | 2  | 0  |   |   |   |
| ENSP00000273398                           | ENSG000000114573 | ATPGV1A         | 239 | 11 | 4  | 10 | 9  | 9  | 8  | 8  | 4  | 11 | 10 | 1  | 7  | 10 | 3  | 6  | 9  | 8  | 6  | 10 | 11 | 7  | 6  | 1  | 3  | 15 | 17 | 11 | 12 | 7  | 5  |   |   |   |
| ENSP00000273406                           | ENSG000000144867 | SRPRB           | 242 | 11 | 11 | 6  | 8  | 15 | 9  | 8  | 10 | 6  | 12 | 5  | 8  | 7  | 8  | 7  | 7  | 8  | 5  | 7  | 11 | 4  | 11 | 7  | 5  | 9  | 9  | 7  | 7  | 8  | 6  |   |   |   |
| ENSP00000273406_rs11074,ENSP0000          | ENSG000000144867 | SRPRB           | 203 | 9  | 10 | 5  | 8  | 11 | 7  | 7  | 9  | 6  | 10 | 4  | 7  | 6  | 8  | 6  | 6  | 5  | 4  | 6  | 9  | 3  | 10 | 6  | 4  | 9  | 8  | 6  | 5  | 5  | 4  |   |   |   |
| ENSP00000273435,ENSP0000                  | ENSG000000144895 | E1F2A           | 163 | 7  | 7  | 3  | 4  | 4  | 6  | 3  | 8  | 8  | 4  | 10 | 5  | 2  | 6  | 5  | 3  | 5  | 2  | 1  | 7  | 4  | 4  | 6  | 6  | 3  | 9  | 10 | 4  | 7  | 9  | 2 |   |   |
| ENSP00000273450,ENSP0000                  | ENSG000000144908 | ALDH111         | 121 | 0  | 0  | 0  | 0  | 0  | 0  | 4  | 1  | 0  | 0  | 0  | 0  | 5  | 0  | 5  | 0  | 0  | 0  | 0  | 5  | 12 | 6  | 4  | 0  | 2  | 31 | 27 | 19 | 0  | 0  | 0 |   |   |
| ENSP00000273512,ENSP0000                  | ENSG000000144959 | ADAACL1         | 100 | 2  | 1  | 4  | 4  | 4  | 5  | 3  | 4  | 2  | 5  | 4  | 3  | 3  | 2  | 7  | 2  | 3  | 5  | 0  | 4  | 5  | 5  | 4  | 3  | 5  | 5  | 2  | 3  | 1  | 0  | 0 |   |   |
| ENSP00000273541,ENSP0000                  | ENSG000000221812 | ISY1            | 33  | 2  | 0  | 1  | 1  | 0  | 0  | 2  | 0  | 3  | 1  | 2  | 1  | 2  | 0  | 0  | 0  | 1  | 0  | 1  | 2  | 2  | 2  | 0  | 2  | 2  | 0  | 0  | 2  | 2  | 2  | 0 |   |   |
| ENSP00000273550,ENSP0000                  | ENSG000000167996 | FTLH16,FTM1     | 77  | 0  | 0  | 0  | 1  | 0  | 1  | 2  | 0  | 0  | 4  | 1  | 5  | 1  | 0  | 2  | 7  | 6  | 5  | 3  | 2  | 3  | 5  | 2  | 4  | 4  | 2  | 5  | 5  | 5  | 2  | 0 |   |   |
| ENSP00000273612,ENSP0000                  | ENSG000000145041 | VPRBP           | 108 | 0  | 1  | 2  | 4  | 0  | 1  | 5  | 2  | 1  | 6  | 0  | 2  | 6  | 0  | 1  | 9  | 7  | 7  | 11 | 6  | 3  | 6  | 4  | 3  | 1  | 3  | 3  | 2  | 8  | 4  | 0 |   |   |
| ENSP00000273628                           | ENSG000000145050 | ARMET           | 311 | 10 | 11 | 8  | 14 | 15 | 14 | 7  | 7  | 6  | 10 | 10 | 9  | 12 | 13 | 17 | 6  | 9  | 8  | 11 | 14 | 13 | 12 | 14 | 7  | 11 | 10 | 8  | 10 | 8  | 7  | 0 |   |   |
| ENSP00000273783,ENSP0000                  | ENSG000000145191 | E1F2B5          | 18  | 2  | 0  | 2  | 0  | 0  | 2  | 1  | 0  | 1  | 1  | 0  | 0  | 0  | 2  | 1  | 1  | 0  | 0  | 0  | 0  | 2  | 0  | 0  | 0  | 0  | 0  | 0  | 0  | 0  | 0  | 0 | 0 |   |
| ENSP00000273853,ENSP0000                  | ENSG000000145241 | CENPF1          | 20  | 2  | 1  | 0  | 2  | 1  | 0  | 2  | 1  | 2  | 0  | 1  | 2  | 0  | 0  | 1  | 0  | 0  | 1  | 0  | 0  | 0  | 3  | 0  | 0  | 0  | 0  | 0  | 0  | 0  | 1  | 0 | 0 |   |
| ENSP00000273920,ENSP0000                  | ENSG000000145293 | ENOPH1          | 103 | 6  | 1  | 3  | 4  | 6  | 3  | 3  | 2  | 6  | 3  | 0  | 2  | 3  | 0  | 4  | 4  | 4  | 4  | 4  | 4  | 5  | 1  | 2  | 7  | 6  | 6  | 5  | 2  | 2  | 3  | 0 |   |   |
| ENSP00000273962,ENSP0000                  | ENSG000000145331 | RG9MTD2         | 17  | 1  | 0  | 0  | 1  | 0  | 1  | 0  | 0  | 0  | 0  | 0  | 1  | 0  | 1  | 0  | 0  | 0  | 0  | 0  | 1  | 1  | 0  | 1  | 0  | 3  | 2  | 1  | 2  | 0  | 0  | 0 |   |   |
| ENSP00000273986                           | ENSG000000145354 | C1SD2           | 54  | 2  | 2  | 1  | 1  | 2  | 1  | 3  | 2  | 1  | 2  | 1  | 2  | 2  | 1  | 2  | 2  | 3  | 1  | 1  | 3  | 1  | 3  | 2  | 1  | 1  | 3  | 1  | 2  | 3  | 2  | 0 |   |   |
| ENSP00000274000                           | ENSG000000138660 | C4orf16         | 13  | 1  | 0  | 0  | 1  | 1  | 0  | 0  | 2  | 0  | 0  | 0  | 1  | 0  | 1  | 2  | 0  | 1  | 0  | 2  | 0  | 0  | 0  | 0  | 0  | 0  | 0  | 0  | 0  | 0  | 0  | 0 | 0 |   |
| ENSP00000274008,ENSP0000                  | ENSG000000145375 | SPATAS          | 27  | 0  | 0  | 0  | 3  | 0  | 2  | 1  | 0  | 0  | 0  | 0  | 0  | 0  | 3  | 0  | 2  | 2  | 0  | 0  | 2  | 0  | 2  | 0  | 0  | 0  | 3  | 1  | 0  | 3  | 1  | 2 | 0 |   |
| ENSP00000274028,ENSP0000                  | ENSG000000145388 | METTL14         | 22  | 0  | 0  | 1  | 1  | 0  | 1  | 1  | 0  | 1  | 0  | 0  | 0  | 0  | 1  | 1  | 0  | 0  | 2  | 1  | 2  | 2  | 0  | 0  | 1  | 0  | 2  | 2  | 0  | 0  | 1  | 2 | 1 | 0 |
| ENSP00000274031                           | ENSG000000145391 | SETD7           | 47  | 2  | 1  | 0  | 1  | 2  | 1  | 2  | 1  | 0  | 1  | 0  | 1  | 0  | 1  | 2  | 1  | 2  | 5  | 1  | 2  | 2  | 2  | 0  | 0  | 0  | 2  | 4  | 1  | 4  | 4  | 3 | 0 |   |
| ENSP00000274054,ENSP0000                  | ENSG000000145414 | NAF1            | 11  | 0  | 1  | 0  | 0  | 1  | 0  | 1  | 0  | 1  | 0  | 0  | 0  | 0  | 1  | 1  | 1  | 0  | 0  | 0  | 0  | 2  | 0  | 0  | 0  | 0  | 0  | 0  | 0  | 0  | 1  | 0 | 0 |   |
| ENSP00000274203,ENSP0000                  | ENSG000000145555 | MYO10           | 27  | 0  | 0  | 0  | 4  | 2  | 2  | 0  | 0  | 0  | 1  | 0  | 1  | 1  | 0  | 0  | 0  | 1  | 0  | 2  | 1  | 1  | 0  | 0  | 0  | 2  | 2  | 1  | 2  | 1  | 1  | 2 | 0 |   |
| ENSP00000274217,ENSP0000                  | ENSG000000145569 | FIAM105A        | 17  | 0  | 1  | 1  | 0  | 0  | 0  | 2  | 2  | 0  | 0  | 0  | 0  | 0  | 0  | 0  | 0  | 0  | 0  | 1  | 0  | 0  | 0  | 0  | 1  | 0  | 0  | 3  | 3  | 2  | 0  | 0 | 1 |   |
| ENSP00000274311,ENSP0000                  | ENSG000000152684 | PELO            | 44  | 1  | 2  | 1  | 2  | 3  | 3  | 2  | 1  | 2  | 0  | 0  | 0  | 1  | 2  | 1  | 3  | 2  | 2  | 2  | 2  | 2  | 2  | 2  | 1  | 0  | 1  | 1  | 2  | 0  | 1  | 2 | 2 |   |
| ENSP00000274311_rs149921,ENSG000000152684 | ENSG000000152684 | PELO            | 46  | 2  | 2  | 1  | 2  | 4  | 3  | 2  | 1  | 2  | 0  | 0  | 0  | 0  | 2  | 1  | 1  | 3  | 2  | 2  | 2  | 2  | 2  | 1  | 0  | 1  | 1  | 2  | 1  | 1  | 3  | 3 | 2 |   |
| ENSP00000274335,ENSP0000                  | ENSG000000145675 | PIK3R1          | 26  | 1  | 2  | 2  | 4  | 3  | 1  | 2  | 2  | 2  | 0  | 0  | 0  | 0  | 0  | 0  | 0  | 0  | 1  | 1  | 0  | 1  | 0  | 0  | 0  | 0  | 0  | 1  | 1  | 2  | 0  | 0 | 0 |   |
| ENSP00000274364_rs243131,ENSG000000145703 | ENSG000000145703 | IQGAP1          | 316 | 30 | 6  | 19 | 0  | 0  | 0  | 16 | 24 | 23 | 23 | 1  | 6  | 0  | 0  | 0  | 0  | 0  | 0  | 0  | 0  | 0  | 45 | 12 | 35 | 33 | 18 | 25 | 0  | 0  | 0  | 0 | 0 | 0 |
| ENSP00000274376,ENSP0000                  | ENSG000000145715 | RASA1           | 41  | 2  | 0  | 0  | 7  | 10 | 8  | 1  | 1  | 1  | 1  | 0  | 0  | 0  | 0  | 0  | 0  | 0  | 1  | 1  | 0  | 0  | 1  | 0  | 2  | 0  | 1  | 0  | 0  | 0  | 0  | 1 | 0 | 0 |
| ENSP00000274458,ENSP0000                  | ENSG000000145781 | COMMD10         | 18  | 3  | 0  | 1  | 1  | 0  | 1  | 0  | 0  | 0  | 0  | 0  | 0  | 2  | 0  | 1  | 2  | 0  | 1  | 0  | 0  | 1  | 1  | 0  | 0  | 1  | 1  | 0  | 1  | 0  | 1  | 0 | 1 |   |
| ENSP00000274498,ENSP0000                  | ENSG000000145819 | ARHGAP26        | 25  | 0  | 1  | 0  | 6  | 4  | 5  | 1  | 0  | 0  | 1  | 0  | 0  | 0  | 0  | 0  | 0  | 0  | 0  | 1  | 0  | 0  | 0  | 1  | 0  | 1  | 1  | 0  | 2  | 0  | 0  | 0 | 0 | 0 |
| ENSP00000274516,ENSP0000                  | ENSG000000145835 | CDKN2AIPNL      | 70  | 3  | 4  | 4  | 1  | 2  | 1  | 2  | 2  | 1  | 7  | 3  | 4  | 2  | 4  | 1  | 4  | 2  | 3  | 2  | 1  | 0  | 2  | 1  | 3  | 4  | 0  | 2  | 1  | 1  | 3  | 0 | 0 |   |
| ENSP00000274562,ENSP0000                  | ENSG000000133706 | LRCS            | 549 | 13 | 8  | 11 | 14 | 27 | 27 | 25 | 13 | 18 | 13 | 5  | 11 | 9  | 5  | 7  | 24 | 27 | 35 | 12 | 11 | 12 | 19 | 12 | 14 | 25 | 23 | 20 | 48 | 27 | 34 | 0 | 0 |   |
| ENSP00000274569,ENSP0000                  | ENSG000000145882 | PYOX1L          | 19  | 2  | 1  | 0  | 0  | 0  | 0  | 1  | 0  | 1  | 0  | 2  | 0  | 1  | 0  | 0  | 0  | 1  | 2  | 3  | 0  | 1  | 0  | 0  | 0  | 0  | 0  | 2  | 0  | 0  | 1  | 0 | 0 | 0 |
| ENSP00000274606                           | ENSG000000145912 | NHP2            | 93  | 2  | 2  | 2  | 1  | 2  | 4  | 1  | 5  | 3  | 5  | 2  | 4  | 1  | 3  | 2  | 0  | 3  | 3  | 3  | 3  | 5  | 2  | 8  | 4  | 5  | 5  | 2  | 2  | 4  | 6  | 2 | 0 |   |
| ENSP00000274670,ENSP0000                  | ENSG000000124782 | REB1            | 12  | 0  | 0  | 1  | 0  | 0  | 0  | 0  | 0  | 0  | 1  | 0  | 0  | 0  | 1  | 0  | 0  | 0  | 2  | 0  | 0  | 1  | 0  | 0  | 2  | 1  | 1  | 0  | 1  | 0  | 1  | 0 | 0 |   |
| ENSP00000274680,ENSP0000                  | ENSG000000145982 | FARS2           | 19  | 2  | 0  | 0  | 0  | 1  | 0  | 0  | 1  | 0  | 0  | 0  | 0  | 0  | 0  | 0  | 0  | 1  | 1  | 1  | 0  | 0  | 0  | 1  | 3  | 0  | 2  | 1  | 3  | 2  | 0  | 0 | 0 |   |
| ENSP00000274695,ENSP0000                  | ENSG000000145996 | CDKAL1          | 18  | 0  | 1  | 2  | 0  | 0  | 2  | 1  | 0  | 0  | 0  | 0  | 0  | 2  | 0  | 0  | 0  | 0  | 2  | 2  | 1  | 0  | 0  | 0  | 1  | 0  | 0  | 1  | 0  | 0  | 2  | 1 | 0 | 0 |
| ENSP00000274712                           | ENSG000000146007 | ZMAT2           | 27  | 4  | 4  | 0  | 0  | 1  | 1  | 0  | 1  | 1  | 0  | 0  | 0  | 0  | 0  | 0  | 0  | 0  | 0  | 0  | 1  | 1  | 0  | 3  | 2  | 0  | 3  | 0  | 0  | 0  | 1  | 0 | 2 | 0 |
| ENSP00000274813                           | ENSG000000146085 | MUT             | 272 | 10 | 8  | 4  | 7  | 7  | 6  | 10 | 6  | 8  | 4  | 2  | 6  | 4  | 5  | 9  | 9  | 12 | 7  | 10 | 10 | 7  | 17 | 6  | 10 | 21 | 21 | 14 | 13 | 10 | 9  | 0 | 0 |   |
| ENSP00000274827,ENSP0000                  | ENSG000000082706 | UIMC1           | 16  | 2  | 0  | 1  | 0  | 0  | 0  | 1  | 1  | 0  | 1  | 0  | 1  | 0  | 0  | 0  | 0  | 0  | 0  | 0  | 0  | 1  | 0  | 1  | 2  | 2  | 2  | 1  | 0  | 0  | 0  | 0 | 0 | 0 |
| ENSP00000274849                           | ENSG000000146109 | ABT1            | 32  | 0  | 2  | 2  | 1  | 1  | 1  | 1  | 0  | 0  | 1  | 1  | 1  | 2  | 2  | 0  | 3  | 1  | 1  | 2  | 2  | 2  | 0  | 0  | 1  | 1  | 0  | 0  | 0  | 2  | 1  | 1 | 0 | 0 |
| ENSP00000274853,ENSP0000                  | ENSG000000206485 | ENSP00000274853 | 42  | 0  | 0  | 1  | 1  | 0  | 1  | 1  | 0  | 0  | 0  | 5  | 4  | 2  | 1  | 0  | 3  | 2  | 1  | 1  | 2  | 0  | 0  | 0  | 0  | 0  | 0  | 0  | 0  | 0  | 6  | 5 | 6 | 0 |
| ENSP00000275034,ENSP0000                  | ENSG000000146247 | PHIP            | 116 | 3  | 1  | 2  | 4  | 0  | 1  | 6  | 0  | 0  | 6  | 0  | 7  | 6  |    |    |    |    |    |    |    |    |    |    |    |    |    |    |    |    |    |   |   |   |

|                                          |                   |             |     |    |    |    |    |    |    |    |    |    |    |    |    |      |    |    |    |    |    |    |    |    |    |    |    |    |    |    |    |    |    |    |   |
|------------------------------------------|-------------------|-------------|-----|----|----|----|----|----|----|----|----|----|----|----|----|------|----|----|----|----|----|----|----|----|----|----|----|----|----|----|----|----|----|----|---|
| ENSP00000278412,ENSP0000                 | ENSG000000149136  | SSRP1       | 298 | 8  | 9  | 12 | 6  | 10 | 9  | 5  | 6  | 6  | 13 | 10 | 7  | 10   | 5  | 9  | 7  | 19 | 13 | 9  | 17 | 9  | 13 | 12 | 9  | 8  | 7  | 6  | 16 | 13 | 15 |    |   |
| ENSP00000278422,ENSP0000                 | ENSG0000000213593 | TMX2        | 75  | 3  | 5  | 4  | 3  | 4  | 1  | 3  | 3  | 4  | 3  | 1  | 1  | 2    | 3  | 3  | 1  | 3  | 3  | 1  | 2  | 2  | 3  | 3  | 1  | 4  | 2  | 1  | 2  | 3  | 1  |    |   |
| ENSP00000278456,rs475291                 | ENSG000000149177  | PTPRJ       | 40  | 0  | 0  | 1  | 7  | 5  | 7  | 1  | 2  | 3  | 0  | 3  | 4  | 0    | 0  | 1  | 0  | 0  | 0  | 0  | 0  | 1  | 0  | 0  | 1  | 0  | 0  | 0  | 0  | 0  | 0  |    |   |
| ENSP00000278505,ENSP0000                 | ENSG000000149218  | ENDOD1      | 120 | 4  | 5  | 3  | 4  | 5  | 3  | 6  | 8  | 5  | 0  | 3  | 1  | 7    | 6  | 5  | 4  | 5  | 3  | 3  | 5  | 2  | 9  | 8  | 4  | 5  | 4  | 3  | 0  | 0  | 0  |    |   |
| ENSP00000278559,ENSP0000                 | ENSG000000149269  | CAPNS       | 23  | 0  | 0  | 0  | 2  | 2  | 4  | 4  | 0  | 2  | 0  | 0  | 0  | 0    | 0  | 0  | 0  | 0  | 0  | 0  | 0  | 0  | 1  | 1  | 0  | 1  | 1  | 5  | 0  | 0  | 0  |    |   |
| ENSP00000278568,ENSP0000                 | ENSG000000149269  | PAK1        | 109 | 8  | 2  | 2  | 7  | 8  | 7  | 5  | 2  | 3  | 2  | 0  | 1  | 4    | 2  | 2  | 2  | 6  | 4  | 3  | 4  | 3  | 4  | 2  | 0  | 0  | 8  | 5  | 2  | 7  | 1  | 5  |   |
| ENSP00000278572,ENSP0000                 | ENSG000000149273  | RPSP33,RP53 | 83  | 30 | 25 | 29 | 21 | 30 | 25 | 35 | 21 | 27 | 23 | 11 | 9  | 29   | 22 | 29 | 32 | 32 | 32 | 26 | 30 | 32 | 37 | 13 | 16 | 36 | 32 | 32 | 35 | 35 | 29 |    |   |
| ENSP00000278593,ENSP0000                 | ENSG000000149292  | TTC12       | 10  | 1  | 0  | 0  | 0  | 0  | 0  | 0  | 0  | 0  | 0  | 0  | 0  | 0    | 1  | 0  | 0  | 2  | 1  | 0  | 0  | 1  | 1  | 1  | 1  | 0  | 0  | 0  | 0  | 1  | 0  |    |   |
| ENSP00000278612,ENSP0000                 | ENSG000000149308  | NPAT        | 20  | 2  | 1  | 0  | 0  | 1  | 2  | 0  | 0  | 0  | 1  | 0  | 0  | 2    | 2  | 0  | 0  | 0  | 0  | 0  | 1  | 0  | 1  | 2  | 0  | 0  | 1  | 1  | 0  | 2  | 0  |    |   |
| ENSP00000278616,ENSP0000                 | ENSG000000149311  | ATM         | 37  | 0  | 2  | 2  | 5  | 1  | 1  | 0  | 0  | 2  | 1  | 5  | 1  | 0    | 1  | 1  | 0  | 0  | 0  | 2  | 2  | 1  | 1  | 1  | 1  | 0  | 0  | 0  | 1  | 3  | 2  | 2  |   |
| ENSP00000278618,ENSP0000                 | ENSG000000149313  | AASDHPPT    | 13  | 2  | 1  | 1  | 0  | 0  | 0  | 0  | 0  | 1  | 1  | 0  | 0  | 0    | 2  | 0  | 0  | 0  | 0  | 0  | 0  | 1  | 1  | 0  | 0  | 0  | 0  | 1  | 0  | 1  | 1  | 0  |   |
| ENSP00000278671                          | ENSG000000149357  | C11orf59    | 74  | 3  | 4  | 2  | 1  | 2  | 2  | 3  | 4  | 4  | 2  | 4  | 2  | 4    | 3  | 3  | 1  | 2  | 2  | 2  | 1  | 1  | 3  | 1  | 3  | 2  | 3  | 6  | 2  | 2  | 1  | 3  | 2 |
| ENSP00000278715,ENSP0000                 | ENSG000000149397  | HMB5        | 11  | 1  | 1  | 2  | 0  | 1  | 0  | 1  | 0  | 2  | 0  | 0  | 0  | 0    | 0  | 0  | 1  | 0  | 0  | 0  | 0  | 0  | 0  | 0  | 0  | 0  | 0  | 1  | 0  | 0  | 0  | 0  |   |
| ENSP00000278742,ENSP0000                 | ENSG000000149418  | ST14        | 80  | 4  | 1  | 2  | 4  | 2  | 2  | 4  | 7  | 3  | 3  | 0  | 3  | 5    | 3  | 3  | 1  | 5  | 1  | 4  | 5  | 3  | 3  | 3  | 3  | 3  | 1  | 4  | 1  | 0  | 0  | 0  |   |
| ENSP00000278752,ENSP0000                 | ENSG000000149428  | HYOU1       | 897 | 42 | 30 | 36 | 27 | 48 | 56 | 33 | 29 | 42 | 37 | 14 | 21 | 17   | 12 | 30 | 24 | 37 | 37 | 31 | 33 | 38 | 33 | 26 | 36 | 20 | 15 | 18 | 36 | 19 | 20 | 0  |   |
| ENSP00000278823                          | ENSG000000149480  | MTA2        | 239 | 10 | 4  | 7  | 8  | 10 | 7  | 7  | 8  | 8  | 11 | 10 | 5  | 6    | 5  | 7  | 5  | 11 | 6  | 4  | 6  | 6  | 9  | 7  | 8  | 10 | 11 | 8  | 14 | 10 | 10 | 11 |   |
| ENSP00000278845,ENSP0000                 | ENSG000000149499  | EML3        | 12  | 0  | 1  | 0  | 0  | 0  | 0  | 1  | 0  | 0  | 0  | 0  | 0  | 0    | 0  | 0  | 1  | 1  | 1  | 0  | 1  | 0  | 0  | 0  | 0  | 0  | 1  | 0  | 0  | 2  | 0  | 3  |   |
| ENSP00000278849,ENSP0000                 | ENSG000000149503  | INCENP      | 17  | 0  | 1  | 0  | 1  | 0  | 0  | 2  | 0  | 0  | 0  | 0  | 0  | 2    | 2  | 0  | 0  | 0  | 0  | 1  | 3  | 0  | 2  | 2  | 1  | 0  | 0  | 0  | 0  | 0  | 0  | 0  | 0 |
| ENSP00000278856,T991,ENSG000000133316    |                   | WDR74       | 49  | 3  | 2  | 1  | 1  | 0  | 0  | 2  | 1  | 1  | 4  | 1  | 1  | 2    | 2  | 2  | 2  | 5  | 1  | 2  | 2  | 1  | 1  | 2  | 3  | 1  | 0  | 1  | 3  | 1  | 0  | 1  |   |
| ENSP00000278916,ENSP0000                 | ENSG000000149554  | CHEK1       | 14  | 3  | 1  | 2  | 2  | 0  | 0  | 2  | 0  | 0  | 0  | 0  | 0  | 1    | 0  | 0  | 0  | 0  | 0  | 3  | 0  | 0  | 0  | 0  | 0  | 0  | 0  | 0  | 0  | 0  | 0  | 0  | 0 |
| ENSP00000278935,ENSP0000                 | ENSG000000110274  | CEP164      | 14  | 2  | 0  | 1  | 0  | 0  | 0  | 1  | 0  | 1  | 1  | 1  | 1  | 0    | 0  | 2  | 0  | 1  | 0  | 1  | 0  | 0  | 0  | 0  | 0  | 0  | 0  | 0  | 0  | 0  | 1  | 1  | 0 |
| ENSP00000278937,ENSP0000                 | ENSG000000149573  | MP2L2       | 12  | 0  | 0  | 1  | 1  | 0  | 0  | 0  | 1  | 0  | 1  | 3  | 1  | 3    | 0  | 0  | 0  | 0  | 0  | 1  | 0  | 0  | 0  | 0  | 0  | 0  | 0  | 0  | 0  | 0  | 0  | 0  | 0 |
| ENSP00000278968,ENSP0000                 | ENSG000000149591  | TAGLN       | 152 | 41 | 37 | 15 | 0  | 0  | 0  | 0  | 0  | 0  | 1  | 0  | 0  | 0    | 0  | 1  | 2  | 2  | 5  | 1  | 4  | 2  | 2  | 1  | 0  | 0  | 0  | 0  | 0  | 13 | 15 | 10 |   |
| ENSP00000278976,ENSP0000                 | ENSG000000124191  | TOX2        | 13  | 1  | 0  | 0  | 0  | 0  | 0  | 0  | 0  | 0  | 2  | 0  | 0  | 0    | 0  | 0  | 1  | 0  | 0  | 0  | 2  | 1  | 1  | 0  | 1  | 0  | 1  | 0  | 0  | 1  | 1  | 1  |   |
| C20orf117                                | ENSG000000149639  | P20orf117   | 11  | 0  | 1  | 0  | 1  | 0  | 0  | 0  | 0  | 0  | 0  | 0  | 2  | 0    | 0  | 0  | 0  | 0  | 0  | 0  | 3  | 1  | 2  | 0  | 1  | 0  | 0  | 0  | 0  | 0  | 0  | 0  |   |
| ENSP00000279035,ENSP0000                 | ENSG000000124155  | IGT         | 15  | 3  | 0  | 1  | 1  | 0  | 0  | 1  | 1  | 0  | 0  | 0  | 0  | 0    | 0  | 0  | 1  | 1  | 0  | 1  | 0  | 0  | 1  | 0  | 0  | 0  | 1  | 2  | 1  | 0  | 0  | 0  |   |
| ENSP00000279052,ENSP0000                 | ENSG000000125991  | LRGIC3      | 89  | 9  | 5  | 5  | 2  | 0  | 4  | 4  | 4  | 4  | 1  | 0  | 1  | 2    | 2  | 0  | 5  | 1  | 3  | 1  | 3  | 3  | 2  | 2  | 3  | 1  | 2  | 2  | 1  | 2  | 2  | 5  |   |
| ENSP00000279068,ENSP0000                 | ENSG000000149657  | EMEB4       | 72  | 5  | 3  | 7  | 4  | 3  | 4  | 3  | 0  | 3  | 2  | 3  | 2  | 1    | 2  | 0  | 3  | 2  | 2  | 5  | 4  | 3  | 2  | 1  | 1  | 1  | 1  | 1  | 1  | 2  | 2  | 1  |   |
| ENSP00000279146                          | ENSG000000110711  | AIP         | 133 | 8  | 5  | 6  | 4  | 6  | 5  | 6  | 2  | 5  | 4  | 2  | 3  | 3    | 2  | 2  | 3  | 6  | 7  | 4  | 5  | 3  | 5  | 4  | 2  | 7  | 5  | 3  | 4  | 6  | 6  | 6  |   |
| ENSP00000279146_G219V,r:ENSG000000110711 |                   | AIP         | 132 | 7  | 5  | 6  | 4  | 5  | 5  | 6  | 2  | 5  | 4  | 2  | 3  | 3    | 2  | 3  | 5  | 7  | 4  | 5  | 3  | 5  | 4  | 2  | 7  | 5  | 3  | 4  | 6  | 6  | 6  |    |   |
| ENSP00000279146_rs64108:ENSG000000110711 |                   | AIP         | 140 | 8  | 6  | 6  | 5  | 6  | 6  | 7  | 2  | 5  | 4  | 2  | 3  | 3    | 2  | 2  | 4  | 6  | 7  | 4  | 5  | 3  | 5  | 4  | 2  | 7  | 5  | 3  | 5  | 7  | 6  | 6  |   |
| ENSP00000279230,ENSP0000                 | ENSG000000149782  | PLCB3       | 174 | 2  | 2  | 3  | 2  | 0  | 0  | 9  | 8  | 6  | 2  | 5  | 3  | 4    | 4  | 3  | 10 | 9  | 6  | 7  | 5  | 1  | 3  | 2  | 15 | 19 | 9  | 11 | 8  | 11 | 0  | 0  |   |
| ENSP00000279242                          | ENSG000000149792  | MRP149      | 117 | 5  | 1  | 4  | 4  | 6  | 5  | 2  | 2  | 4  | 5  | 3  | 3  | 4    | 2  | 4  | 4  | 5  | 2  | 3  | 3  | 1  | 7  | 1  | 7  | 1  | 4  | 6  | 4  | 6  | 7  | 3  |   |
| ENSP00000279247,ENSP0000                 | ENSG000000149216  | CAPN1       | 360 | 11 | 10 | 14 | 10 | 13 | 13 | 19 | 11 | 18 | 10 | 3  | 7  | 9    | 7  | 14 | 18 | 14 | 12 | 12 | 14 | 18 | 6  | 7  | 8  | 22 | 16 | 22 | 8  | 8  | 5  | 0  |   |
| ENSP00000279259                          | ENSG000000149801  | FAU         | 33  | 1  | 1  | 0  | 1  | 0  | 1  | 1  | 1  | 1  | 1  | 1  | 1  | 0    | 2  | 1  | 0  | 2  | 3  | 0  | 2  | 2  | 2  | 1  | 1  | 1  | 2  | 1  | 1  | 1  | 1  | 1  |   |
| ENSP00000279281,ENSP0000                 | ENSG000000149823  | C11orf2     | 70  | 1  | 0  | 2  | 5  | 3  | 4  | 4  | 1  | 1  | 4  | 0  | 2  | 2    | 1  | 4  | 0  | 0  | 1  | 4  | 1  | 3  | 3  | 2  | 2  | 6  | 2  | 4  | 2  | 2  | 2  | 2  |   |
| ENSP00000279387                          | ENSG000000149923  | PPP4C       | 135 | 7  | 2  | 7  | 4  | 4  | 4  | 2  | 1  | 4  | 7  | 0  | 1  | PP4C | 1  | 3  | 6  | 7  | 5  | 3  | 6  | 6  | 5  | 1  | 6  | 6  | 6  | 6  | 10 | 5  | 6  | 6  |   |
| ENSP00000279392,ENSP0000                 | ENSG000000149929  | HIRIP3      | 43  | 3  | 1  | 0  | 2  | 2  | 1  | 2  | 0  | 0  | 2  | 1  | 0  | 1    | 2  | 1  | 1  | 2  | 2  | 2  | 2  | 1  | 2  | 2  | 0  | 2  | 1  | 0  | 2  | 3  | 3  | 0  |   |
| ENSP00000279394,ENSP0000                 | ENSG000000149930  | TAOK2       | 29  | 2  | 2  | 1  | 3  | 1  | 0  | 1  | 0  | 1  | 2  | 0  | 0  | 1    | 1  | 0  | 0  | 0  | 1  | 3  | 1  | 1  | 1  | 1  | 0  | 2  | 1  | 0  | 0  | 1  | 2  | 0  |   |
| ENSP00000279550                          | ENSG000000060138  | CSBA        | 257 | 19 | 11 | 7  | 10 | 20 | 6  | 12 | 9  | 8  | 16 | 8  | 5  | 11   | 12 | 9  | 10 | 21 | 11 | 12 | 19 | 8  | 16 | 13 | 9  | 14 | 12 | 6  | 14 | 16 | 13 | 0  |   |
| ENSP00000279599,ENSP0000                 | ENSG000000136754  | AD1         | 34  | 2  | 0  | 0  | 0  | 1  | 1  | 1  | 0  | 1  | 1  | 0  | 0  | 0    | 0  | 0  | 3  | 0  | 0  | 0  | 1  | 2  | 1  | 1  | 4  | 1  | 0  | 2  | 1  | 0  | 0  | 0  |   |
| ENSP00000279839,ENSP0000                 | ENSG000000150316  | CWC15       | 59  | 3  | 2  | 2  | 2  | 3  | 2  | 0  | 4  | 5  | 2  | 3  | 0  | 2    | 2  | 0  | 4  | 1  | 0  | 2  | 2  | 2  | 2  | 1  | 1  | 2  | 4  | 0  | 2  | 3  | 1  | 2  |   |
| ENSP00000279873,ENSP0000                 | ENSG000000150347  | AND5B       | 23  | 3  | 3  | 1  | 0  | 1  | 0  | 3  | 0  | 1  | 0  | 0  | 0  | 1    | 0  | 3  | 1  | 0  | 0  | 0  | 0  | 1  | 2  | 1  | 2  | 0  | 0  | 0  | 0  | 0  | 0  | 0  |   |
| ENSP00000280097,ENSP0000                 | ENSG000000150540  | HNM1T       | 18  | 0  | 0  | 1  | 1  | 3  | 3  | 1  | 1  | 1  | 0  | 0  | 0  | 0    | 0  | 0  | 0  | 0  | 0  | 0  | 0  | 0  | 0  | 0  | 1  | 0  | 2  | 1  | 3  | 0  | 0  | 0  |   |
| ENSP00000280154,ENSP0000                 | ENSG000000150593  | PCOD4       | 189 | 1  | 1  | 3  | 10 | 16 | 11 | 6  | 7  | 6  | 1  | 1  | 2  | 4    | 3  | 4  | 4  | 6  | 3  | 6  | 7  | 5  | 6  | 9  | 4  | 13 | 15 | 10 | 9  | 10 | 6  | 0  |   |
| ENSP00000280326                          | ENSG000000150753  | CCT5        | 371 | 37 | 17 | 22 | 18 | 15 | 14 | 26 | 16 | 24 | 23 | 4  | 15 | 26   | 11 | 23 | 37 | 26 | 33 | 33 | 30 | 27 | 28 | 18 | 23 | 49 | 26 | 28 | 31 | 25 | 26 | 0  |   |
| ENSP00000280333,ENSP0000                 | ENSG000000150760  | DOCK1       | 27  | 0  | 3  | 2  | 0  | 1  | 1  | 0  | 1  | 2  | 1  | 1  | 0  | 0    | 0  | 0  | 1  | 1  | 0  | 0  | 3  | 0  | 1  | 2  | 1  | 0  | 1  | 2  | 3  | 0  | 0  | 0  | 0 |
| ENSP00000280346,ENSP0000                 | ENSG000000150768  | DLAT        | 258 | 17 | 8  | 16 | 6  | 8  | 12 | 9  | 5  | 11 | 11 | 8  | 9  | 8    | 3  | 6  | 10 | 11 | 10 | 8  | 7  | 10 | 4  | 3  | 5  | 11 | 13 | 9  | 9  | 5  | 6  | 6  |   |
| ENSP00000280354                          | ENSG000000150779  | TM18M8B     | 59  | 2  | 0  | 2  | 1  | 1  | 1  | 4  | 1  | 1  | 0  | 2  | 1  | 1    | 2  | 1  | 0  | 2  | 1  | 4  | 4  | 1  | 3  | 4  | 2  | 3  | 2  | 1  | 2  | 2  | 2  | 2  |   |
| ENSP00000280357                          | ENSG000000150782  | IL18        | 19  | 1  | 0  | 0  |    |    |    |    |    |    |    |    |    |      |    |    |    |    |    |    |    |    |    |    |    |    |    |    |    |    |    |    |   |

[illegible]

|                               |                  |             |     |    |   |   |   |   |   |   |    |   |   |   |   |   |   |   |   |   |    |   |    |   |   |   |   |   |   |   |   |   |   |   |
|-------------------------------|------------------|-------------|-----|----|---|---|---|---|---|---|----|---|---|---|---|---|---|---|---|---|----|---|----|---|---|---|---|---|---|---|---|---|---|---|
| ENSP00000287546,ENSP0000      | ENSG000000156931 | VPS8        | 11  | 2  | 0 | 0 | 0 | 0 | 0 | 0 | 0  | 0 | 1 | 0 | 0 | 0 | 1 | 1 | 1 | 0 | 1  | 1 | 0  | 0 | 0 | 0 | 1 | 1 | 0 | 1 | 0 | 3 |   |   |
| ENSP00000287600,ENSP0000      | ENSG000000156973 | PDE6D       | 70  | 0  | 0 | 0 | 3 | 3 | 2 | 2 | 0  | 0 | 1 | 0 | 0 | 0 | 0 | 1 | 3 | 1 | 2  | 3 | 2  | 1 | 2 | 0 | 2 | 3 | 1 | 0 | 2 | 0 | 3 |   |
| ENSP00000287613,ENSP0000      | ENSG000000214021 | ARPC4,TTLL3 | 37  | 0  | 4 | 3 | 0 | 0 | 3 | 3 | 3  | 3 | 3 | 1 | 2 | 2 | 2 | 2 | 4 | 2 | 3  | 2 | 3  | 1 | 0 | 0 | 4 | 2 | 3 | 3 | 1 | 3 |   |   |
| ENSP00000287771,ENSP0000      | ENSG000000157110 | RBPM5       | 13  | 4  | 3 | 2 | 0 | 1 | 1 | 0 | 0  | 0 | 0 | 0 | 0 | 0 | 0 | 0 | 0 | 0 | 0  | 0 | 1  | 0 | 0 | 0 | 0 | 0 | 0 | 0 | 0 | 0 |   |   |
| ENSP00000287859,ENSP0000      | ENSG000000157181 | C1orf727    | 59  | 5  | 2 | 2 | 1 | 3 | 3 | 2 | 2  | 1 | 1 | 1 | 0 | 0 | 2 | 1 | 2 | 1 | 3  | 1 | 2  | 6 | 4 | 3 | 4 | 4 | 0 | 1 | 1 | 0 |   |   |
| ENSP00000287878,ENSP0000      | ENSG000000106617 | PRKAG2      | 30  | 1  | 1 | 1 | 2 | 2 | 2 | 1 | 0  | 0 | 1 | 0 | 0 | 1 | 0 | 1 | 2 | 1 | 1  | 1 | 1  | 1 | 0 | 1 | 1 | 1 | 1 | 2 | 2 | 1 |   |   |
| ENSP00000287936,ENSP0000      | ENSG000000113161 | HMGCR       | 10  | 3  | 0 | 1 | 1 | 0 | 0 | 0 | 0  | 0 | 0 | 0 | 0 | 0 | 0 | 0 | 0 | 2 | 1  | 0 | 0  | 0 | 0 | 0 | 0 | 0 | 0 | 1 | 0 | 0 | 0 |   |
| ENSP00000288050,ENSP0000      | ENSG000000090857 | PDPR        | 101 | 2  | 2 | 7 | 2 | 1 | 3 | 2 | 0  | 2 | 3 | 1 | 2 | 1 | 0 | 1 | 9 | 7 | 7  | 3 | 2  | 1 | 5 | 1 | 4 | 2 | 7 | 3 | 7 | 8 | 6 |   |
| ENSP00000288063,ENSP0000      | ENSG000000157344 | EXOSC6      | 60  | 5  | 2 | 1 | 0 | 2 | 1 | 1 | 0  | 1 | 5 | 3 | 1 | 3 | 0 | 3 | 2 | 1 | 2  | 1 | 1  | 3 | 2 | 3 | 2 | 2 | 0 | 1 | 4 | 4 | 4 |   |
| ENSP00000288071_R82W,ENSP0000 | ENSG000000157349 | DDX198      | 104 | 4  | 6 | 5 | 2 | 4 | 1 | 2 | 6  | 3 | 5 | 2 | 1 | 1 | 4 | 1 | 3 | 2 | 3  | 2 | 6  | 3 | 4 | 2 | 1 | 7 | 6 | 2 | 7 | 6 | 3 |   |
| ENSP00000288078,ENSP0000      | ENSG000000157553 | FUK1        | 17  | 1  | 0 | 2 | 1 | 0 | 0 | 1 | 0  | 1 | 5 | 1 | 0 | 1 | 0 | 1 | 0 | 1 | 0  | 1 | 0  | 1 | 0 | 0 | 0 | 0 | 0 | 1 | 2 | 0 | 0 |   |
| ENSP00000288111,ENSP0000      | ENSG000000157379 | DHRS1       | 19  | 0  | 0 | 0 | 1 | 0 | 0 | 0 | 1  | 0 | 1 | 0 | 2 | 0 | 0 | 0 | 0 | 0 | 0  | 1 | 1  | 1 | 1 | 3 | 0 | 0 | 0 | 3 | 1 | 2 | 0 | 0 |
| ENSP00000288235,ENSP0000      | ENSG000000157483 | MYO1E       | 115 | 3  | 2 | 8 | 8 | 9 | 8 | 2 | 4  | 3 | 2 | 0 | 0 | 5 | 0 | 4 | 4 | 3 | 3  | 7 | 6  | 2 | 2 | 3 | 1 | 4 | 9 | 5 | 5 | 1 | 2 | 4 |
| ENSP00000288245,ENSP0000      | ENSG000000137309 | HMGGA1      | 139 | 3  | 4 | 5 | 1 | 3 | 2 | 2 | 3  | 4 | 7 | 7 | 7 | 3 | 4 | 5 | 9 | 6 | 10 | 3 | 3  | 2 | 6 | 5 | 7 | 6 | 4 | 8 | 3 | 4 | 3 |   |
| ENSP00000288266,ENSP0000      | ENSG000000157500 | APPL1       | 38  | 1  | 2 | 1 | 1 | 1 | 4 | 1 | 0  | 1 | 2 | 2 | 1 | 1 | 0 | 2 | 0 | 1 | 0  | 3 | 1  | 2 | 0 | 1 | 0 | 3 | 2 | 1 | 2 | 1 | 1 |   |
| ENSP00000288274,ENSP0000      | ENSG000000157514 | TSC2D23     | 27  | 2  | 0 | 1 | 2 | 1 | 1 | 2 | 0  | 1 | 1 | 0 | 1 | 2 | 0 | 1 | 0 | 0 | 3  | 1 | 0  | 2 | 0 | 0 | 1 | 0 | 0 | 0 | 4 | 0 | 1 |   |
| ENSP00000288344,ENSP0000      | ENSG000000157576 | SLC35B2     | 161 | 10 | 9 | 3 | 3 | 3 | 1 | 5 | 10 | 2 | 9 | 6 | 4 | 1 | 5 | 5 | 2 | 6 | 2  | 3 | 10 | 5 | 8 | 6 |   |   |   |   |   |   |   |   |

|                                       |                  |              |     |    |    |    |    |    |    |    |    |    |    |   |    |    |    |    |    |    |    |    |    |    |    |    |    |    |    |    |    |    |    |   |
|---------------------------------------|------------------|--------------|-----|----|----|----|----|----|----|----|----|----|----|---|----|----|----|----|----|----|----|----|----|----|----|----|----|----|----|----|----|----|----|---|
| ENSP00000292334,ENSP0000              | ENSG00000088727  | KIF9         | 10  | 1  | 1  | 0  | 1  | 0  | 1  | 2  | 0  | 0  | 0  | 0 | 0  | 1  | 0  | 0  | 1  | 0  | 0  | 1  | 0  | 0  | 0  | 0  | 0  | 0  | 0  | 0  | 0  | 0  | 0  |   |
| ENSP00000292401                       | ENSG000000160862 | AZGP1P1,AZGI | 23  | 0  | 0  | 0  | 5  | 4  | 3  | 3  | 2  | 4  | 0  | 0 | 0  | 0  | 0  | 0  | 0  | 0  | 0  | 0  | 0  | 0  | 0  | 0  | 0  | 0  | 0  | 0  | 0  | 0  | 0  |   |
| ENSP00000292431,ENSP0000              | ENSG000000160877 | NAC1         | 50  | 2  | 3  | 1  | 1  | 1  | 1  | 2  | 1  | 0  | 1  | 1 | 2  | 1  | 2  | 1  | 2  | 2  | 1  | 4  | 2  | 4  | 0  | 1  | 2  | 3  | 1  | 2  | 3  | 1  | 2  |   |
| ENSP00000292475,ENSP0000              | ENSG000000160916 | ATPSJ2       | 37  | 0  | 0  | 3  | 0  | 0  | 2  | 0  | 0  | 1  | 0  | 1 | 0  | 1  | 0  | 1  | 1  | 0  | 3  | 0  | 0  | 2  | 3  | 0  | 4  | 2  | 3  | 4  | 2  | 2  | 2  |   |
| ENSP00000292478,ENSP0000              | ENSG000000160246 | PTCD1        | 35  | 2  | 4  | 3  | 2  | 0  | 0  | 0  | 2  | 0  | 1  | 1 | 2  | 1  | 2  | 0  | 2  | 0  | 0  | 1  | 0  | 0  | 1  | 1  | 1  | 3  | 2  | 1  | 2  | 1  | 0  |   |
| ENSP00000292510                       | ENSG000000160948 | VPS28        | 114 | 4  | 1  | 4  | 8  | 7  | 6  | 7  | 0  | 1  | 2  | 0 | 2  | 7  | 1  | 0  | 3  | 6  | 5  | 7  | 4  | 2  | 2  | 2  | 3  | 5  | 3  | 4  | 8  | 4  | 6  |   |
| ENSP00000292535_V88I,ENSG000000160967 | CUX1             | 125          | 6   | 1  | 2  | 3  | 2  | 4  | 6  | 6  | 1  | 4  | 3  | 8 | 7  | 2  | 6  | 3  | 1  | 4  | 9  | 8  | 6  | 3  | 6  | 5  | 3  | 0  | 3  | 7  | 1  | 0  |    |   |
| ENSP00000292538,ENSP0000              | ENSG000000160967 | CUX1         | 122 | 8  | 0  | 2  | 4  | 2  | 3  | 7  | 8  | 3  | 4  | 3 | 8  | 7  | 0  | 5  | 3  | 1  | 3  | 8  | 7  | 5  | 3  | 6  | 4  | 5  | 3  | 0  | 4  | 5  | 1  |   |
| ENSP00000292616,ENSP0000              | ENSG000000161036 | RWD1         | 27  | 1  | 2  | 0  | 1  | 0  | 1  | 2  | 0  | 1  | 4  | 1 | 2  | 1  | 1  | 1  | 2  | 1  | 1  | 0  | 1  | 0  | 0  | 1  | 0  | 0  | 0  | 0  | 0  | 0  | 1  |   |
| ENSP00000292644                       | ENSG000000161057 | PSMC2        | 610 | 19 | 17 | 26 | 15 | 16 | 14 | 16 | 18 | 19 | 33 | 8 | 15 | 17 | 12 | 19 | 21 | 23 | 20 | 23 | 21 | 25 | 17 | 14 | 13 | 25 | 25 | 21 | 44 | 25 | 29 |   |
| ENSP00000292782                       | ENSG00000043093  | DCUN1D1      | 23  | 2  | 0  | 2  | 1  | 0  | 0  | 1  | 0  | 3  | 2  | 0 | 0  | 0  | 0  | 0  | 0  | 2  | 1  | 0  | 0  | 0  | 1  | 2  | 0  | 0  | 1  | 2  | 0  | 1  | 0  |   |
| ENSP00000292807,ENSP0000              | ENSG000000161203 | AP2M1        | 35  | 1  | 0  | 2  | 2  | 1  | 1  | 1  | 1  | 0  | 2  | 2 | 0  | 1  | 2  | 1  | 4  | 1  | 1  | 1  | 1  | 0  | 2  | 1  | 0  | 1  | 1  | 1  | 3  | 1  | 0  | 1 |
| ENSP00000292808,ENSP0000              | ENSG000000161204 | ABCY3        | 158 | 7  | 4  | 9  | 7  | 6  | 8  | 5  | 6  | 1  | 1  | 2 | 0  | 4  | 4  | 2  | 6  | 7  | 6  | 9  | 6  | 4  | 5  | 4  | 3  | 9  | 6  | 5  | 5  | 8  | 9  |   |
| ENSP00000292823                       | ENSG000000161217 | PCTF1A       | 165 | 5  | 9  | 9  | 6  | 8  | 6  | 6  | 5  | 5  | 8  | 3 | 8  | 2  | 6  | 3  | 2  | 4  | 3  | 5  | 9  | 4  | 7  | 6  | 3  | 6  | 6  | 4  | 5  | 6  | 6  |   |
| ENSP00000293195                       | ENSG000000161513 | FDXR         | 165 | 7  | 3  | 4  | 6  | 2  | 4  | 4  | 3  | 4  | 5  | 3 | 6  | 4  | 1  | 3  | 6  | 7  | 5  | 8  | 5  | 6  | 13 | 5  | 8  | 9  | 6  | 5  | 9  | 4  | 10 |   |
| ENSP00000293201,ENSP0000              | ENSG000000188126 | MUO15B       | 15  | 0  | 0  | 0  | 4  | 2  | 2  | 1  | 0  | 0  | 0  | 0 | 1  | 0  | 0  | 1  | 0  | 0  | 0  | 0  | 0  | 0  | 0  | 0  | 0  | 0  | 0  | 3  | 1  | 0  | 0  | 0 |
| ENSP00000293208,ENSP0000              | ENSG000000161526 | SAP30BP      | 73  | 4  | 5  | 5  | 3  | 1  | 2  | 4  | 2  | 3  | 2  | 2 | 1  | 4  | 2  | 0  | 3  | 3  | 2  | 2  | 4  | 0  | 2  | 3  |    |    |    |    |    |    |    |   |

|                                            |             |     |    |    |    |    |    |    |    |    |    |    |    |    |    |    |    |    |    |    |    |    |    |    |    |    |    |    |    |    |    |    |   |
|--------------------------------------------|-------------|-----|----|----|----|----|----|----|----|----|----|----|----|----|----|----|----|----|----|----|----|----|----|----|----|----|----|----|----|----|----|----|---|
| ENSP00000295956,ENSP000000000136068        | FLNB        | 351 | 30 | 11 | 22 | 5  | 3  | 3  | 8  | 7  | 10 | 25 | 5  | 6  | 7  | 6  | 13 | 5  | 10 | 6  | 5  | 7  | 6  | 36 | 21 | 30 | 17 | 14 | 17 | 8  | 4  | 4  |   |
| ENSP00000295962                            | ABHD6       | 20  | 1  | 0  | 2  | 0  | 0  | 1  | 0  | 0  | 0  | 0  | 1  | 2  | 2  | 0  | 1  | 1  | 1  | 1  | 0  | 1  | 0  | 0  | 0  | 2  | 2  | 1  | 0  | 0  | 0  |    |   |
| ENSP00000295971,ENSP000000000163686        | RBM47       | 104 | 1  | 0  | 2  | 5  | 4  | 5  | 7  | 3  | 9  | 0  | 0  | 0  | 0  | 3  | 1  | 4  | 0  | 1  | 0  | 6  | 4  | 8  | 4  | 0  | 9  | 8  | 9  | 11 | 0  | 0  |   |
| ENSP00000295974_A378T,EI,ENSP0000000163697 | APPB2       | 16  | 0  | 0  | 1  | 3  | 0  | 0  | 0  | 0  | 0  | 0  | 0  | 1  | 0  | 0  | 1  | 0  | 1  | 1  | 3  | 0  | 3  | 0  | 0  | 0  | 1  | 0  | 1  | 0  | 0  |    |   |
| ENSP00000295989_rs12629;ENSP0000000144712  | CAN2        | 33  | 2  | 0  | 0  | 1  | 0  | 1  | 1  | 0  | 0  | 0  | 0  | 0  | 0  | 1  | 2  | 2  | 1  | 4  | 1  | 2  | 3  | 0  | 1  | 2  | 1  | 3  | 3  | 0  | 1  |    |   |
| ENSP00000296051,ENSP000000000163755        | HP53        | 14  | 1  | 0  | 0  | 1  | 0  | 2  | 0  | 0  | 0  | 0  | 0  | 0  | 1  | 0  | 1  | 0  | 0  | 3  | 0  | 0  | 0  | 0  | 0  | 0  | 0  | 1  | 3  | 1  | 0  |    |   |
| ENSP00000296126,ENSP000000000163811        | WDR43       | 58  | 4  | 2  | 1  | 1  | 0  | 0  | 2  | 2  | 1  | 3  | 2  | 0  | 0  | 1  | 2  | 2  | 2  | 1  | 2  | 2  | 4  | 6  | 2  | 1  | 3  | 0  | 1  | 4  | 2  | 3  |   |
| ENSP00000296129,ENSP000000000163814        | CDCL1       | 83  | 0  | 0  | 0  | 1  | 0  | 1  | 1  | 2  | 1  | 6  | 1  | 5  | 5  | 4  | 3  | 7  | 8  | 4  | 3  | 2  | 4  | 4  | 1  | 2  | 3  | 1  | 1  | 5  | 4  | 4  |   |
| ENSP00000296135,ENSP000000000163818        | LZTF1       | 113 | 0  | 1  | 2  | 5  | 5  | 7  | 2  | 2  | 0  | 2  | 2  | 3  | 4  | 0  | 3  | 3  | 10 | 6  | 5  | 4  | 6  | 2  | 0  | 4  | 12 | 8  | 2  | 5  | 6  | 2  |   |
| ENSP00000296137,ENSP000000000163820        | FYCO1       | 67  | 0  | 2  | 0  | 0  | 0  | 0  | 1  | 3  | 0  | 10 | 1  | 5  | 1  | 1  | 2  | 1  | 2  | 3  | 1  | 3  | 4  | 5  | 1  | 2  | 4  | 5  | 2  | 3  | 4  | 1  |   |
| ENSP00000296147,ENSP000000000160796        |             | 20  | 0  | 0  | 0  | 3  | 2  | 3  | 2  | 1  | 1  | 0  | 1  | 1  | 0  | 0  | 0  | 0  | 0  | 0  | 0  | 0  | 0  | 0  | 0  | 0  | 2  | 2  | 0  | 2  | 0  | 0  |   |
| ENSP00000296161,ENSP000000000163840        | DTX3L       | 39  | 0  | 0  | 0  | 2  | 1  | 2  | 6  | 7  | 3  | 0  | 0  | 0  | 0  | 0  | 1  | 0  | 1  | 1  | 1  | 2  | 0  | 2  | 4  | 2  | 1  | 2  | 1  | 0  | 0  | 0  |   |
| ENSP00000296181_Y766N                      | ITGB5       | 19  | 1  | 0  | 0  | 0  | 0  | 0  | 1  | 2  | 1  | 4  | 0  | 4  | 1  | 0  | 1  | 2  | 0  | 0  | 0  | 0  | 0  | 0  | 0  | 0  | 0  | 0  | 0  | 2  | 0  | 0  |   |
| ENSP00000296214,ENSP000000000163875        | C1orf149    | 11  | 0  | 0  | 0  | 0  | 0  | 1  | 0  | 0  | 0  | 0  | 0  | 1  | 0  | 0  | 0  | 1  | 1  | 0  | 2  | 0  | 1  | 0  | 2  | 0  | 0  | 0  | 0  | 1  | 1  |    |   |
| ENSP00000296215                            | SNIP1       | 33  | 3  | 1  | 0  | 1  | 1  | 0  | 1  | 1  | 1  | 0  | 2  | 0  | 0  | 2  | 0  | 2  | 0  | 1  | 0  | 2  | 0  | 2  | 3  | 1  | 2  | 1  | 0  | 4  | 2  | 0  |   |
| ENSP00000296223                            | POLR2H      | 110 | 5  | 1  | 0  | 4  | 4  | 3  | 3  | 2  | 2  | 8  | 1  | 2  | 4  | 2  | 3  | 3  | 4  | 4  | 5  | 3  | 6  | 6  | 2  | 4  | 7  | 4  | 3  | 6  | 5  | 4  |   |
| ENSP00000296254,ENSP000000000163900        | TMEM41A     | 18  | 3  | 0  | 1  | 1  | 1  | 0  | 0  | 2  | 1  | 0  | 0  | 0  | 1  | 1  | 1  | 1  | 0  | 1  | 0  | 0  | 0  | 2  | 0  | 2  | 0  | 0  | 0  | 0  | 0  | 0  |   |
| ENSP00000296255,ENSP000000000163902        | RPN1        | 875 | 42 | 33 | 36 | 26 | 30 | 32 | 31 | 34 | 25 | 39 | 18 | 20 | 17 | 21 | 33 | 26 | 31 | 33 | 35 | 32 | 34 | 34 | 28 | 25 | 38 | 30 | 23 | 30 | 22 | 17 |   |
| ENSP00000296273,ENSP000000000163918        | RFC4        | 229 | 7  | 10 | 6  | 3  | 10 | 7  | 5  | 6  | 12 | 5  | 5  | 7  | 6  | 9  | 6  | 12 | 13 | 8  | 8  | 9  | 6  | 8  | 8  | 8  | 8  | 5  | 8  | 11 | 7  |    |   |
| ENSP00000296288,ENSP000000000163930        | BAP1        | 14  | 0  | 1  | 0  | 1  | 0  | 0  | 0  | 0  | 0  | 1  | 0  | 1  | 0  | 0  | 2  | 0  | 0  | 0  | 1  | 1  | 0  | 0  | 4  | 0  | 0  | 0  | 0  | 1  | 1  | 0  |   |
| ENSP00000296289,ENSP000000000163931        | TKT         | 827 | 42 | 20 | 30 | 16 | 34 | 28 | 26 | 31 | 28 | 21 | 9  | 13 | 9  | 18 | 15 | 30 | 41 | 31 | 29 | 42 | 28 | 31 | 18 | 27 | 49 | 48 | 39 | 29 | 24 | 21 |   |
| ENSP00000296289_R246Q,D,ENSP0000000163931  | TKT         | 809 | 41 | 20 | 29 | 16 | 34 | 27 | 25 | 31 | 27 | 22 | 10 | 15 | 9  | 18 | 15 | 27 | 39 | 31 | 29 | 41 | 27 | 30 | 18 | 26 | 47 | 46 | 37 | 28 | 23 | 21 |   |
| ENSP00000296325,ENSP000000000163956        | LRPAP1      | 93  | 9  | 11 | 5  | 1  | 5  | 4  | 6  | 4  | 2  | 1  | 1  | 0  | 1  | 2  | 2  | 1  | 2  | 0  | 3  | 4  | 3  | 2  | 5  | 0  | 3  | 1  | 1  | 4  | 7  | 3  |   |
| ENSP00000296328                            | UBXN7       | 83  | 3  | 0  | 2  | 3  | 3  | 2  | 2  | 1  | 1  | 6  | 1  | 1  | 2  | 0  | 2  | 4  | 5  | 2  | 5  | 6  | 5  | 2  | 0  | 1  | 2  | 3  | 1  | 8  | 5  | 5  |   |
| ENSP00000296350,ENSP000000000163975        | PMF1        | 21  | 0  | 0  | 0  | 2  | 2  | 1  | 0  | 0  | 0  | 1  | 1  | 2  | 0  | 0  | 0  | 2  | 3  | 1  | 1  | 0  | 1  | 1  | 0  | 0  | 0  | 0  | 1  | 0  | 1  | 0  |   |
| ENSP00000296370                            | S100P       | 31  | 0  | 0  | 0  | 0  | 1  | 4  | 1  | 2  | 8  | 0  | 0  | 0  | 0  | 1  | 0  | 0  | 0  | 0  | 0  | 0  | 0  | 1  | 2  | 1  | 4  | 4  | 0  | 2  | 0  | 0  |   |
| ENSP00000296388,ENSP000000000117385        | LEPR1       | 46  | 3  | 2  | 1  | 2  | 0  | 1  | 1  | 0  | 1  | 0  | 1  | 3  | 3  | 1  | 2  | 2  | 2  | 2  | 3  | 1  | 2  | 0  | 0  | 0  | 1  | 1  | 1  | 3  | 4  | 3  |   |
| ENSP00000296411,ENSP000000000164024        | METAP1      | 80  | 3  | 2  | 2  | 2  | 3  | 2  | 2  | 0  | 2  | 1  | 1  | 1  | 2  | 2  | 3  | 3  | 3  | 2  | 4  | 5  | 2  | 2  | 2  | 2  | 7  | 5  | 2  | 5  | 4  | 4  |   |
| ENSP00000296412                            | ADH5P4,ADH5 | 202 | 12 | 5  | 6  | 7  | 8  | 7  | 5  | 6  | 6  | 7  | 1  | 4  | 7  | 0  | 4  | 14 | 10 | 7  | 7  | 4  | 4  | 6  | 0  | 4  | 13 | 13 | 9  | 14 | 6  | 6  |   |
| ENSP00000296425                            | PGRMC2      | 64  | 2  | 2  | 2  | 1  | 2  | 2  | 3  | 2  | 1  | 2  | 1  | 2  | 1  | 3  | 1  | 2  | 2  | 2  | 2  | 2  | 4  | 2  | 1  | 3  | 1  | 4  | 4  | 3  | 1  | 4  |   |
| ENSP00000296440,ENSP000000000164050        | PLXNB1      | 10  | 0  | 0  | 2  | 1  | 0  | 1  | 0  | 0  | 0  | 0  | 0  | 0  | 0  | 0  | 0  | 0  | 0  | 0  | 0  | 0  | 0  | 1  | 1  | 0  | 0  | 2  | 0  | 1  | 0  | 0  |   |
| ENSP00000296441,ENSP000000000164051        | CCDC51      | 31  | 2  | 1  | 2  | 2  | 0  | 2  | 0  | 0  | 0  | 1  | 0  | 2  | 1  | 0  | 1  | 2  | 1  | 1  | 2  | 0  | 2  | 4  | 1  | 2  | 1  | 1  | 0  | 0  | 0  | 0  |   |
| ENSP00000296446,ENSP000000000114302        | PKRAR2A     | 212 | 12 | 5  | 8  | 7  | 3  | 5  | 5  | 4  | 6  | 14 | 3  | 8  | 4  | 4  | 8  | 4  | 5  | 4  | 7  | 5  | 4  | 15 | 4  | 10 | 18 | 7  | 10 | 11 | 4  | 8  |   |
| ENSP00000296456,ENSP000000000164062        | APBH        | 257 | 10 | 11 | 7  | 8  | 12 | 8  | 8  | 8  | 6  | 8  | 8  | 3  | 8  | 11 | 5  | 8  | 11 | 9  | 9  | 7  | 5  | 6  | 7  | 8  | 18 | 16 | 10 | 12 | 8  | 6  |   |
| ENSP00000296464,ENSP000000000164070        | HSPA4L      | 310 | 5  | 5  | 5  | 8  | 13 | 9  | 12 | 9  | 16 | 8  | 6  | 3  | 3  | 5  | 6  | 15 | 8  | 6  | 15 | 10 | 7  | 8  | 7  | 28 | 24 | 10 | 20 | 17 | 17 |    |   |
| ENSP00000296464_rs13801;ENSP0000000164070  | HSPA4L      | 301 | 5  | 5  | 5  | 8  | 12 | 9  | 12 | 9  | 16 | 8  | 6  | 3  | 3  | 5  | 6  | 15 | 8  | 7  | 16 | 10 | 7  | 8  | 7  | 26 | 22 | 10 | 18 | 15 | 15 |    |   |
| ENSP00000296474_rs10626;ENSP0000000164078  | MTS1R       | 36  | 1  | 0  | 1  | 1  | 1  | 1  | 1  | 2  | 2  | 2  | 0  | 2  | 1  | 1  | 2  | 1  | 2  | 0  | 2  | 2  | 3  | 1  | 1  | 0  | 2  | 1  | 1  | 0  | 1  | 1  |   |
| ENSP00000296490                            | WDR82       | 37  | 2  | 0  | 2  | 0  | 1  | 0  | 0  | 0  | 2  | 2  | 0  | 2  | 1  | 0  | 0  | 1  | 0  | 2  | 0  | 5  | 2  | 1  | 1  | 2  | 1  | 1  | 1  | 3  | 1  | 4  |   |
| ENSP00000296503                            | HMGGB2      | 220 | 13 | 7  | 2  | 5  | 7  | 9  | 7  | 0  | 2  | 8  | 4  | 3  | 4  | 6  | 4  | 5  | 12 | 5  | 12 | 16 | 16 | 8  | 6  | 5  | 10 | 6  | 8  | 11 | 11 | 5  |   |
| ENSP00000296509                            | MAD2L1      | 80  | 3  | 1  | 2  | 4  | 3  | 1  | 3  | 0  | 3  | 4  | 2  | 0  | 4  | 3  | 3  | 2  | 2  | 2  | 3  | 4  | 3  | 4  | 2  | 2  | 5  | 1  | 1  | 6  | 4  | 3  |   |
| ENSP00000296511,ENSP000000000164111        | ANKA5       | 753 | 40 | 19 | 24 | 16 | 23 | 20 | 28 | 22 | 28 | 30 | 7  | 11 | 18 | 21 | 23 | 29 | 24 | 28 | 18 | 22 | 25 | 31 | 10 | 17 | 34 | 26 | 19 | 69 | 30 | 41 |   |
| ENSP00000296519,ENSP000000000164118        | KIAA1712    | 15  | 2  | 0  | 0  | 0  | 0  | 0  | 0  | 0  | 0  | 0  | 0  | 0  | 0  | 0  | 0  | 1  | 0  | 0  | 2  | 0  | 2  | 1  | 1  | 0  | 3  | 0  | 1  | 0  | 0  | 0  |   |
| ENSP00000296521,ENSP000000000164120        | HPGD        | 24  | 1  | 1  | 1  | 0  | 0  | 0  | 0  | 0  | 0  | 1  | 0  | 0  | 1  | 0  | 0  | 0  | 0  | 0  | 0  | 0  | 0  | 0  | 8  | 7  | 4  | 0  | 0  | 0  | 0  | 0  |   |
| ENSP00000296543,ENSP000000000164134        | NARG1       | 274 | 11 | 11 | 8  | 6  | 9  | 6  | 7  | 9  | 6  | 4  | 1  | 4  | 7  | 8  | 9  | 17 | 13 | 13 | 22 | 13 | 6  | 7  | 5  | 5  | 12 | 3  | 15 | 16 | 12 |    |   |
| ENSP00000296577,ENSP000000000164163        | ABCE1       | 191 | 8  | 5  | 6  | 2  | 6  | 7  | 3  | 5  | 6  | 10 | 0  | 3  | 10 | 4  | 8  | 12 | 11 | 7  | 3  | 7  | 10 | 7  | 3  | 5  | 10 | 4  | 5  | 12 | 5  | 7  |   |
| ENSP00000296582,ENSP000000000164168        | TMEM184C    | 12  | 0  | 0  | 0  | 2  | 0  | 0  | 2  | 1  | 0  | 1  | 0  | 1  | 0  | 0  | 0  | 0  | 1  | 0  | 1  | 1  | 0  | 0  | 1  | 0  | 0  | 1  | 0  | 0  | 0  | 0  |   |
| ENSP00000296585,ENSP000000000164171        | ITGA2       | 140 | 4  | 1  | 1  | 4  | 4  | 3  | 7  | 7  | 8  | 4  | 1  | 1  | 2  | 3  | 3  | 9  | 10 | 6  | 8  | 6  | 3  | 16 | 5  | 5  | 7  | 6  | 4  | 0  | 0  | 2  |   |
| ENSP00000296597                            | NDUFA2      | 93  | 2  | 3  | 2  | 4  | 2  | 3  | 3  | 2  | 1  | 0  | 4  | 2  | 2  | 1  | 4  | 1  | 3  | 2  | 4  | 4  | 4  | 5  | 6  | 3  | 3  | 3  | 5  | 3  | 2  | 6  | 5 |
| ENSP00000296603,ENSP000000000164187        | LMBRD2      | 18  | 3  | 0  | 0  | 1  | 0  | 0  | 1  | 1  | 1  | 0  | 0  | 0  | 0  | 1  | 1  | 0  | 0  | 0  | 1  | 0  | 0  | 0  | 0  | 1  | 1  | 3  | 1  | 1  | 0  | 1  | 0 |
| ENSP00000296626,ENSP000000000164209        | SLC25A46    | 14  | 1  | 0  | 0  | 2  | 2  | 1  | 1  | 0  | 0  | 2  | 1  | 0  | 0  | 0  | 0  | 0  | 0  | 0  | 1  | 0  | 0  | 1  | 0  | 1  | 1  | 0  | 0  | 0  | 0  | 0  | 0 |
| ENSP00000296658                            | CMBL        | 68  | 2  | 0  | 1  | 2  | 2  | 2  | 3  | 2  | 2  | 0  | 0  | 0  | 3  | 0  | 1  | 2  | 2  | 3  | 4  | 2  | 2  | 4  | 0  | 3  | 5  | 6  | 5  | 5  | 2  | 3  |   |
| ENSP00000296666,ENSP000000000164244        | PRRC1       | 74  | 3  | 2  | 2  | 2  | 3  | 1  | 0  | 3  | 3  | 1  | 1  | 2  | 1  | 2  | 1  | 4  | 3  | 2  | 1  | 2  | 3  | 3  | 2  | 3  | 5  | 3  | 6  | 3  | 2  | 3  |   |
| ENSP00000296674                            | RPS3        | 68  | 3  | 3  | 2  | 0  | 4  | 4  | 5  |    |    |    |    |    |    |    |    |    |    |    |    |    |    |    |    |    |    |    |    |    |    |    |   |

[illegible]

|                                         |                 |          |     |    |    |    |    |    |    |    |    |    |    |    |    |    |    |    |    |    |    |    |    |    |    |    |    |    |    |    |    |    |    |   |
|-----------------------------------------|-----------------|----------|-----|----|----|----|----|----|----|----|----|----|----|----|----|----|----|----|----|----|----|----|----|----|----|----|----|----|----|----|----|----|----|---|
| ENSP00000301071                         | ENSG00000167552 | TUBA1A   | 639 | 30 | 16 | 22 | 11 | 27 | 19 | 8  | 11 | 13 | 25 | 12 | 17 | 22 | 8  | 19 | 26 | 21 | 19 | 11 | 50 | 28 | 16 | 12 | 14 | 35 | 29 | 23 | 43 | 21 | 31 |   |
| ENSP00000301072                         | ENSG00000167553 | TUBA1C   | 624 | 29 | 16 | 21 | 11 | 27 | 17 | 8  | 11 | 12 | 23 | 17 | 22 | 8  | 20 | 26 | 21 | 17 | 10 | 50 | 26 | 16 | 12 | 14 | 32 | 30 | 22 | 42 | 21 | 31 |    |   |
| ENSP00000301173,ENSP000                 | ENSG00000167600 | CYP25C1  | 85  | 2  | 5  | 3  | 2  | 3  | 1  | 4  | 5  | 0  | 1  | 2  | 2  | 3  | 1  | 2  | 0  | 1  | 0  | 1  | 1  | 11 | 8  | 5  | 9  | 7  | 5  | 0  | 0  | 0  |    |   |
| ENSP00000301180,ENSP000                 | ENSG00000060684 | DIP2B    | 48  | 3  | 4  | 1  | 2  | 3  | 0  | 1  | 1  | 0  | 1  | 0  | 2  | 2  | 3  | 2  | 2  | 2  | 0  | 3  | 5  | 0  | 1  | 0  | 1  | 1  | 6  | 1  | 0  | 0  | 1  |   |
| ENSP00000301196,ENSP000                 | ENSG00000167615 | LENGB    | 17  | 0  | 0  | 0  | 1  | 3  | 0  | 2  | 1  | 0  | 1  | 0  | 0  | 2  | 0  | 0  | 0  | 1  | 0  | 0  | 1  | 1  | 0  | 1  | 0  | 0  | 1  | 0  | 1  | 1  | 1  |   |
| ENSP00000301244,ENSP000                 | ENSG00000167642 | SPINT2   | 88  | 5  | 4  | 3  | 6  | 2  | 3  | 6  | 1  | 4  | 0  | 2  | 2  | 1  | 4  | 5  | 1  | 3  | 3  | 6  | 6  | 4  | 4  | 2  | 2  | 2  | 3  | 2  | 4  | 0  | 0  | 0 |
| ENSP00000301246,ENSP000                 | ENSG00000167644 | C19orf13 | 13  | 0  | 0  | 0  | 0  | 0  | 1  | 0  | 0  | 1  | 0  | 0  | 0  | 0  | 0  | 1  | 0  | 1  | 3  | 0  | 2  | 0  | 0  | 0  | 0  | 1  | 0  | 2  | 0  | 0  | 1  |   |
| ENSP00000301264                         | ENSG00000167657 | DAPK3    | 16  | 2  | 0  | 1  | 0  | 0  | 0  | 1  | 1  | 1  | 0  | 0  | 0  | 0  | 0  | 0  | 1  | 1  | 1  | 0  | 1  | 1  | 2  | 1  | 0  | 0  | 1  | 0  | 1  | 0  | 1  |   |
| ENSP00000301280,ENSP000                 | ENSG00000167670 | CHAF1A   | 32  | 1  | 1  | 0  | 1  | 0  | 0  | 0  | 0  | 1  | 0  | 1  | 1  | 1  | 2  | 2  | 0  | 1  | 0  | 3  | 6  | 0  | 1  | 3  | 0  | 1  | 0  | 1  | 0  | 3  | 2  |   |
| ENSP00000301281,ENSP000                 | ENSG00000167671 | UBXN6    | 18  | 0  | 0  | 0  | 0  | 1  | 1  | 0  | 0  | 1  | 0  | 0  | 1  | 1  | 0  | 1  | 0  | 1  | 1  | 0  | 1  | 1  | 1  | 0  | 0  | 1  | 2  | 0  | 1  | 1  | 2  |   |
| ENSP00000301284,ENSP000                 | ENSG00000167674 |          | 146 | 7  | 6  | 6  | 6  | 1  | 1  | 6  | 6  | 2  | 5  | 3  | 5  | 4  | 3  | 7  | 2  | 5  | 5  | 10 | 6  | 9  | 8  | 3  | 2  | 4  | 5  | 6  | 5  | 3  | 5  |   |
| ENSP00000301286_rs72597,ENSG00000167676 |                 | KIAA1881 | 11  | 0  | 0  | 0  | 0  | 0  | 0  | 3  | 2  | 1  | 0  | 0  | 0  | 0  | 0  | 0  | 0  | 0  | 0  | 0  | 0  | 0  | 0  | 0  | 0  | 1  | 3  | 1  | 0  | 0  | 0  |   |
| ENSP00000301323,ENSP000                 | ENSG00000160957 | RECQL4   | 20  | 1  | 1  | 0  | 0  | 0  | 0  | 0  | 1  | 0  | 3  | 0  | 0  | 0  | 1  | 1  | 0  | 1  | 0  | 0  | 6  | 1  | 0  | 0  | 0  | 0  | 0  | 0  | 1  | 1  | 2  |   |
| ENSP00000301329,ENSP000                 | ENSG00000167699 | GLOD4    | 159 | 7  | 5  | 2  | 6  | 9  | 9  | 2  | 2  | 2  | 4  | 2  | 4  | 3  | 3  | 3  | 6  | 10 | 5  | 4  | 7  | 3  | 3  | 2  | 3  | 11 | 12 | 8  | 6  | 8  | 8  |   |
| ENSP00000301335,ENSP000                 | ENSG00000167703 | SLC43A2  | 22  | 1  | 0  | 2  | 0  | 0  | 1  | 1  | 0  | 0  | 0  | 0  | 0  | 0  | 3  | 1  | 0  | 2  | 1  | 1  | 0  | 3  | 1  | 0  | 0  | 2  | 1  | 0  | 0  | 1  |    |   |
| ENSP00000301364,ENSP000                 | ENSG00000167721 | TSR1     | 238 | 13 | 9  | 4  | 2  | 6  | 5  | 4  | 1  | 4  | 10 | 5  | 6  | 9  | 8  | 8  | 5  | 14 | 9  | 6  | 10 | 7  | 11 | 10 | 8  | 10 | 9  | 4  | 15 | 14 | 12 |   |
| ENSP00000301387,ENSP000                 | ENSG00000074370 | ATP2A3   | 195 | 9  | 5  | 4  | 5  | 12 | 8  | 11 | 8  | 9  | 5  | 4  | 4  | 5  | 4  | 5  | 6  | 7  | 4  | 6  | 7  | 7  | 6  | 5  | 5  | 10 | 7  | 6  | 7  | 7  | 7  |   |
| ENSP00000301396,ENSG00000141456         |                 | PEL1     | 55  | 1  | 2  | 2  | 1  | 1  | 1  | 0  | 1  | 1  | 6  | 3  | 1  | 1  | 1  | 1  | 1  | 0  | 0  | 1  | 2  | 3  | 2  | 2  | 4  | 2  | 1  | 2  | 6  | 0  | 6  |   |
| ENSP00000301453                         | ENSG00000167770 | OTU81    | 116 | 7  | 4  | 6  | 3  | 4  | 4  | 5  | 3  | 3  | 4  | 1  | 3  | 1  | 2  | 3  | 2  | 4  | 5  | 4  | 5  | 3  | 2  | 2  | 2  | 7  | 5  | 2  | 11 | 5  | 4  |   |
| ENSP00000301457                         | ENSG00000167774 | NUDFA7   | 12  | 0  | 0  | 0  | 0  | 0  | 0  | 0  | 0  | 0  | 1  | 0  | 1  | 0  | 0  | 0  | 0  | 2  | 3  | 1  | 0  | 0  | 0  | 0  | 1  | 0  | 1  | 1  | 0  | 0  | 1  |   |
| ENSP00000301490,ENSP000                 | ENSG00000167799 | NUDT8    | 16  | 1  | 0  | 0  | 0  | 0  | 0  | 1  | 0  | 0  | 0  | 0  | 0  | 0  | 0  | 0  | 1  | 0  | 0  | 1  | 0  | 1  | 1  | 3  | 1  | 1  | 2  | 1  | 0  | 2  | 0  |   |
| ENSP00000301522                         | ENSG00000167815 | PRDX2    | 519 | 19 | 11 | 17 | 13 | 15 | 19 | 7  | 7  | 8  | 13 | 3  | 15 | 17 | 7  | 17 | 14 | 18 | 24 | 20 | 29 | 24 | 18 | 8  | 15 | 26 | 34 | 27 | 27 | 22 | 25 |   |
| ENSP00000301585,ENSP000                 | ENSG00000167862 | ICT1     | 120 | 6  | 3  | 2  | 4  | 3  | 5  | 7  | 4  | 4  | 4  | 4  | 4  | 2  | 4  | 4  | 4  | 6  | 4  | 4  | 3  | 2  | 4  | 5  | 4  | 5  | 4  | 4  | 5  | 3  | 3  |   |
| ENSP00000301587                         | ENSG00000167863 | ATP5B    | 274 | 14 | 7  | 8  | 4  | 5  | 10 | 7  | 3  | 8  | 12 | 3  | 5  | 4  | 6  | 11 | 7  | 9  | 12 | 7  | 9  | 15 | 15 | 10 | 13 | 12 | 11 | 10 | 17 | 9  | 11 |   |
| ENSP00000301607,ENSP000                 | ENSG00000167890 | EVLH     | 163 | 0  | 0  | 0  | 4  | 3  | 0  | 12 | 13 | 6  | 1  | 3  | 1  | 9  | 10 | 12 | 5  | 16 | 6  | 11 | 15 | 5  | 11 | 8  | 5  | 3  | 2  | 2  | 0  | 0  | 0  |   |
| ENSP00000301653                         | ENSG00000186832 | KRT16    | 220 | 14 | 8  | 4  | 10 | 10 | 5  | 8  | 3  | 7  | 14 | 7  | 9  | 8  | 2  | 5  | 12 | 11 | 6  | 9  | 5  | 4  | 19 | 11 | 7  | 10 | 7  | 5  | 0  | 0  | 0  |   |
| ENSP00000301659_rs72129,ENSG00000167914 |                 | GSDMA    | 11  | 0  | 0  | 0  | 3  | 5  | 3  | 0  | 0  | 0  | 0  | 0  | 0  | 0  | 0  | 0  | 0  | 0  | 0  | 0  | 0  | 0  | 0  | 0  | 0  | 0  | 0  | 0  | 0  | 0  | 0  |   |
| ENSP00000301671,ENSP000                 | ENSG00000167925 | GHDC     | 19  | 1  | 0  | 1  | 0  | 0  | 2  | 0  | 0  | 2  | 4  | 0  | 2  | 0  | 0  | 1  | 1  | 0  | 0  | 0  | 0  | 0  | 2  | 0  | 1  | 1  | 1  | 0  | 0  | 0  | 0  |   |
| ENSP00000301678,ENSP000                 | ENSG00000167930 | ITFG3    | 17  | 1  | 1  | 1  | 2  | 2  | 2  | 1  | 0  | 0  | 1  | 0  | 0  | 0  | 1  | 1  | 0  | 1  | 0  | 1  | 1  | 0  | 0  | 0  | 0  | 0  | 0  | 0  | 0  | 1  | 0  |   |
| ENSP00000301686                         | ENSG00000130731 | C16orf13 | 33  | 0  | 1  | 0  | 1  | 1  | 0  | 1  | 1  | 0  | 0  | 0  | 0  | 0  | 0  | 2  | 2  | 1  | 1  | 1  | 2  | 1  | 1  | 1  | 0  | 3  | 2  | 1  | 2  | 4  | 3  |   |
| ENSP00000301729                         | ENSG00000167969 | DCI      | 229 | 5  | 11 | 4  | 5  | 7  | 5  | 10 | 6  | 6  | 9  | 6  | 5  | 3  | 5  | 1  | 12 | 11 | 6  | 12 | 9  | 8  | 14 | 10 | 10 | 8  | 7  | 11 | 7  | 11 | 7  | 8 |
| ENSP00000301740,ENSP000                 | ENSG00000167978 | SRRM2    | 255 | 6  | 5  | 2  | 4  | 5  | 2  | 4  | 3  | 5  | 15 | 7  | 4  | 10 | 7  | 6  | 13 | 12 | 12 | 13 | 15 | 10 | 11 | 11 | 10 | 12 | 9  | 3  | 20 | 9  | 10 |   |
| ENSP00000301761                         | ENSG00000167985 | C11orf79 | 19  | 1  | 0  | 4  | 1  | 0  | 3  | 0  | 0  | 3  | 0  | 0  | 0  | 0  | 0  | 0  | 1  | 0  | 0  | 0  | 0  | 3  | 0  | 0  | 2  | 0  | 0  | 1  | 0  | 0  | 0  |   |
| ENSP00000301764                         | ENSG00000167986 | DDB1     | 534 | 23 | 11 | 12 | 15 | 17 | 16 | 22 | 2  | 13 | 27 | 8  | 11 | 20 | 8  | 17 | 23 | 24 | 18 | 21 | 25 | 16 | 28 | 11 | 16 | 26 | 22 | 10 | 28 | 24 | 20 |   |
| ENSP00000301765,ENSP000                 | ENSG00000167987 | VS37C7   | 26  | 1  | 2  | 1  | 1  | 2  | 0  | 2  | 1  | 1  | 1  | 1  | 0  | 1  | 1  | 0  | 1  | 1  | 1  | 1  | 1  | 1  | 0  | 0  | 0  | 1  | 2  | 0  | 0  | 1  | 1  |   |
| ENSP00000301785                         | ENSG00000214753 | HNRNPUL2 | 546 | 15 | 17 | 8  | 13 | 12 | 12 | 23 | 12 | 27 | 38 | 32 | 20 | 10 | 15 | 16 | 9  | 12 | 10 | 18 | 26 | 18 | 25 | 23 | 26 | 27 | 28 | 17 | 17 | 11 | 9  |   |
| ENSP00000301788                         | ENSG00000168002 | PLRG2G   | 48  | 4  | 1  | 2  | 0  | 1  | 1  | 1  | 0  | 2  | 2  | 1  | 2  | 1  | 0  | 3  | 0  | 1  | 1  | 2  | 2  | 3  | 2  | 0  | 2  | 3  | 1  | 2  | 3  | 3  | 2  |   |
| ENSP00000301810_rs61095,ENSG00000060971 |                 | ACAA1    | 96  | 7  | 0  | 10 | 0  | 0  | 3  | 0  | 2  | 8  | 6  | 0  | 4  | 3  | 1  | 3  | 3  | 0  | 0  | 0  | 1  | 7  | 7  | 2  | 7  | 9  | 1  | 9  | 2  | 0  | 1  |   |
| ENSP00000301843                         | ENSG00000088573 | CTTN     | 424 | 26 | 17 | 18 | 10 | 12 | 8  | 20 | 15 | 16 | 12 | 6  | 7  | 10 | 17 | 12 | 13 | 12 | 9  | 12 | 23 | 12 | 16 | 15 | 7  | 16 | 16 | 13 | 20 | 20 | 14 |   |
| ENSP00000301885,ENSP000                 | ENSG00000168061 | SAC3D1   | 10  | 0  | 0  | 4  | 0  | 0  | 0  | 0  | 0  | 0  | 0  | 0  | 0  | 0  | 0  | 0  | 0  | 0  | 1  | 0  | 1  | 1  | 0  | 0  | 0  | 0  | 0  | 0  | 0  | 1  | 2  |   |
| ENSP00000301886,ENSP000                 | ENSG00000110025 | SNX15    | 11  | 0  | 0  | 1  | 1  | 1  | 1  | 1  | 0  | 0  | 1  | 0  | 0  | 1  | 0  | 1  | 0  | 1  | 1  | 0  | 0  | 1  | 0  | 0  | 0  | 0  | 0  | 0  | 0  | 0  | 0  |   |
| ENSP00000301905                         | ENSG00000168078 | PBK      | 58  | 3  | 2  | 1  | 1  | 0  | 1  | 0  | 0  | 0  | 0  | 0  | 0  | 0  | 5  | 0  | 4  | 3  | 0  | 3  | 5  | 4  | 4  | 0  | 0  | 5  | 2  | 1  | 2  | 6  | 6  |   |
| ENSP00000301919,ENSP000                 | ENSG00000171100 | MTM1     | 41  | 2  | 0  | 1  | 4  | 6  | 2  | 5  | 1  | 1  | 0  | 0  | 1  | 1  | 0  | 0  | 2  | 2  | 0  | 2  | 0  | 0  | 2  | 0  | 2  | 4  | 2  | 0  | 0  | 0  | 1  |   |
| ENSP00000301948,ENSP000                 | ENSG00000169057 | MCEP2    | 32  | 0  | 2  | 1  | 0  | 1  | 3  | 1  | 2  | 1  | 4  | 0  | 1  | 0  | 0  | 0  | 0  | 0  | 0  | 0  | 1  | 0  | 2  | 0  | 1  | 0  | 0  | 0  | 7  | 3  | 2  |   |
| ENSP00000302005,ENSP000                 | ENSG00000129472 | RAB2B    | 50  | 2  | 0  | 1  | 1  | 2  | 1  | 1  | 2  | 3  | 2  | 0  | 1  | 2  | 1  | 2  | 1  | 2  | 3  | 2  | 2  | 2  | 2  | 0  | 1  | 2  | 2  | 2  | 4  | 3  | 1  |   |
| ENSP00000302028,ENSP000                 | ENSG00000168137 | SETD5    | 10  | 0  | 1  | 1  | 0  | 0  | 1  | 0  | 0  | 0  | 0  | 0  | 0  | 0  | 0  | 0  | 1  | 1  | 0  | 0  | 0  | 0  | 0  | 1  | 2  | 0  | 0  | 1  | 0  | 0  | 1  |   |
| ENSP00000302037,ENSP000                 | ENSG00000168958 | MFF      | 28  | 2  | 0  | 2  | 1  | 0  | 1  | 1  | 0  | 0  | 1  | 0  | 1  | 1  | 0  | 1  | 2  | 1  | 2  | 1  | 0  | 0  | 2  | 1  | 2  | 2  | 0  | 1  | 1  | 0  | 2  |   |
| ENSP00000302085,ENSP000                 | ENSG00000169228 | RAB24    | 17  | 1  | 2  | 1  | 1  | 1  | 0  | 2  | 0  | 0  | 0  | 0  | 1  | 0  | 0  | 0  | 0  | 0  | 0  | 0  | 1  | 0  | 0  | 0  | 2  | 1  | 0  | 1  | 0  | 1  | 2  |   |
| ENSP00000302088,ENSP000                 | ENSG00000157916 | RER1     | 62  | 3  | 2  | 2  | 1  | 4  | 1  | 1  | 0  | 3  | 3  | 0  | 1  | 2  | 2  | 3  | 2  | 2  | 1  | 2  | 4  | 5  | 3  | 0  | 1  | 3  | 3  | 2  | 3  | 1  | 2  |   |
| ENSP00000302100                         | ENSG00000171747 | LGALS4   | 66  | 0  | 0  | 0  | 0  | 5  | 5  | 6  | 5  | 7  | 0  | 0  | 0  | 0  | 0  | 0  | 0  | 0  | 0  | 0  | 0  | 0  | 0  | 0  | 1  | 12 | 18 | 7  | 0  | 0  | 0  |   |
| ENSP00000302160                         | ENSG00000170860 | LSM5     | 19  | 0  | 1  | 0  | 1  | 1  | 1  | 1  | 1  | 0  | 0  | 0  | 0  | 0  | 2  | 0  | 0  | 1  |    |    |    |    |    |    |    |    |    |    |    |    |    |   |

|                          |                 |                  |                 |      |    |    |    |    |     |    |    |    |    |    |    |    |    |    |    |    |    |    |    |    |    |    |    |    |     |     |     |    |    |    |
|--------------------------|-----------------|------------------|-----------------|------|----|----|----|----|-----|----|----|----|----|----|----|----|----|----|----|----|----|----|----|----|----|----|----|----|-----|-----|-----|----|----|----|
| ENSP00000303623_r530279H | ENSG00000105281 | SLC1A5           | 271             | 12   | 3  | 8  | 8  | 15 | 9   | 9  | 10 | 14 | 27 | 11 | 17 | 6  | 3  | 11 | 6  | 10 | 4  | 7  | 7  | 13 | 8  | 5  | 4  | 9  | 5   | 8   | 8   | 7  | 7  |    |
| ENSP00000303634          | ENSP0000        | ENSG00000157193  | LRP8            | 11   | 0  | 0  | 0  | 0  | 0   | 0  | 3  | 1  | 5  | 0  | 0  | 0  | 1  | 0  | 0  | 1  | 0  | 0  | 0  | 0  | 0  | 0  | 0  | 0  | 0   | 0   | 0   | 0  | 0  |    |
| ENSP00000303659          | ENSP0000        | ENSG00000153165  | RGPD3           | 127  | 4  | 2  | 6  | 2  | 4   | 2  | 4  | 4  | 3  | 6  | 6  | 5  | 3  | 4  | 4  | 6  | 5  | 3  | 3  | 2  | 7  | 7  | 4  | 4  | 5   | 4   | 5   | 6  | 3  |    |
| ENSP00000303666          | ENSP0000        | ENSG00000171729  | TMEM51          | 12   | 1  | 0  | 0  | 1  | 1   | 1  | 0  | 2  | 1  | 0  | 0  | 0  | 0  | 0  | 1  | 0  | 1  | 1  | 1  | 0  | 1  | 0  | 0  | 0  | 0   | 0   | 0   | 0  |    |    |
| UBZF21                   | ENSG00000170142 |                  | 38              | 2    | 2  | 0  | 1  | 1  | 1   | 0  | 1  | 0  | 2  | 0  | 1  | 1  | 1  | 1  | 1  | 1  | 1  | 1  | 5  | 1  | 1  | 2  | 0  | 2  | 2   | 1   | 3   | 3  |    |    |
| ENSP00000303754          | ENSP0000        | ENSG00000171497  | PPID            | 155  | 9  | 3  | 3  | 3  | 2   | 3  | 1  | 2  | 0  | 3  | 0  | 2  | 7  | 1  | 10 | 8  | 6  | 8  | 8  | 9  | 6  | 2  | 1  | 1  | 12  | 5   | 9   | 13 | 10 |    |
| ENSP00000303769          | ENSP0000        | ENSG00000106948  | AKNA            | 11   | 0  | 0  | 1  | 0  | 2   | 0  | 0  | 0  | 0  | 0  | 0  | 0  | 0  | 1  | 0  | 0  | 2  | 0  | 0  | 0  | 1  | 0  | 0  | 0  | 0   | 2   | 1   | 1  | 0  |    |
| ENSP00000303788          | ENSP0000        | ENSG00000168564  | CKDN2AIP        | 56   | 0  | 1  | 0  | 3  | 1   | 2  | 1  | 2  | 0  | 2  | 0  | 0  | 4  | 0  | 2  | 0  | 1  | 0  | 3  | 5  | 3  | 6  | 5  | 4  | 2   | 1   | 1   | 3  | 2  |    |
| ENSP00000303800          | ENSG00000170322 | NFRKB            | 12              | 1    | 0  | 1  | 1  | 0  | 0   | 0  | 0  | 0  | 0  | 0  | 0  | 1  | 0  | 1  | 2  | 0  | 0  | 0  | 2  | 0  | 0  | 0  | 1  | 1  | 0   | 0   | 1   | 0  |    |    |
| ENSP00000303830          | ENSP0000        | ENSG00000171105  | INFR8           | 29   | 1  | 0  | 1  | 1  | 0   | 1  | 1  | 1  | 1  | 0  | 0  | 0  | 0  | 0  | 0  | 1  | 1  | 1  | 2  | 2  | 1  | 3  | 3  | 3  | 1   | 2   | 0   | 1  | 0  |    |
| ENSP00000303844          | ENSP0000        | ENSG00000169714  | CNBP            | 38   | 3  | 0  | 0  | 0  | 1   | 2  | 1  | 1  | 0  | 3  | 1  | 1  | 0  | 3  | 0  | 1  | 0  | 2  | 1  | 3  | 1  | 3  | 0  | 0  | 5   | 1   | 0   | 3  | 0  |    |
| ENSP00000303908          | ENSP0000        | ENSG00000172814  | TWF2            | 169  | 7  | 3  | 2  | 4  | 3   | 6  | 3  | 5  | 5  | 8  | 1  | 4  | 4  | 1  | 6  | 6  | 10 | 9  | 3  | 10 | 7  | 6  | 2  | 5  | 9   | 2   | 7   | 13 | 6  |    |
| ENSP00000303909          | ENSG00000159842 | ABR              | 87              | 2    | 1  | 2  | 5  | 6  | 4   | 4  | 3  | 4  | 1  | 0  | 0  | 3  | 0  | 3  | 1  | 2  | 2  | 2  | 1  | 2  | 7  | 0  | 5  | 10 | 4   | 3   | 4   | 0  |    |    |
| ENSP00000303991          | ENSG00000162191 | UBXN1            | 86              | 2    | 1  | 3  | 2  | 2  | 3   | 2  | 1  | 4  | 1  | 0  | 1  | 1  | 1  | 3  | 3  | 5  | 3  | 3  | 5  | 5  | 6  | 2  | 4  | 3  | 2   | 3   | 6   | 4  |    |    |
| ENSP00000303992          | ENSG00000170876 | TMEM43           | 91              | 3    | 1  | 2  | 3  | 2  | 0   | 2  | 2  | 2  | 6  | 1  | 4  | 6  | 2  | 5  | 4  | 3  | 2  | 5  | 2  | 3  | 6  | 2  | 5  | 3  | 2   | 2   | 4   | 1  | 6  |    |
| ENSP00000304006          | ENSP0000        | ENSG00000168092  | PAFAH1B2        | 24   | 1  | 2  | 1  | 0  | 1   | 0  | 2  | 1  | 1  | 1  | 1  | 0  | 2  | 2  | 1  | 1  | 2  | 0  | 0  | 2  | 1  | 0  | 0  | 0  | 2   | 0   | 1   | 0  | 0  |    |
| ENSP00000304009          | ENSP0000        | ENSG00000095787  | WAC             | 10   | 0  | 0  | 0  | 0  | 0   | 0  | 0  | 1  | 0  | 0  | 0  | 1  | 0  | 0  | 0  | 1  | 1  | 0  | 0  | 0  | 0  | 0  | 2  | 0  | 0   | 1   | 0   | 1  | 0  |    |
| ENSP00000304017          | ENSG00000171953 | ATPAF2           | 94              | 4    | 2  | 3  | 3  | 2  | 2   | 3  | 3  | 3  | 3  | 3  | 3  | 1  | 1  | 2  | 2  | 3  | 3  | 4  | 4  | 5  | 5  | 3  | 3  | 6  | 5   | 3   | 4   | 4  | 2  |    |
| ENSP00000304072          | ENSG00000123064 | DXK54            | 81              | 4    | 2  | 1  | 0  | 1  | 1   | 1  | 3  | 1  | 4  | 4  | 2  | 1  | 2  | 1  | 4  | 1  | 1  | 2  | 4  | 1  | 4  | 1  | 4  | 3  | 8   | 4   | 3   | 6  | 3  |    |
| ENSP00000304078          | ENSP0000        | ENSG00000168143  | FAM83B          | 30   | 1  | 1  | 1  | 5  | 3   | 1  | 1  | 0  | 0  | 0  | 0  | 0  | 2  | 1  | 1  | 0  | 0  | 0  | 2  | 1  | 1  | 2  | 1  | 1  | 2   | 3   | 0   | 0  | 0  |    |
| ENSP00000304102          | ENSG00000168090 | COP56            | 11              | 1    | 0  | 0  | 0  | 0  | 0   | 0  | 0  | 0  | 0  | 0  | 0  | 0  | 0  | 0  | 0  | 0  | 1  | 0  | 0  | 1  | 0  | 0  | 0  | 1  | 2   | 0   | 1   | 2  | 0  |    |
| ENSP00000304151          | ENSP0000        | ENSG00000170727  | BOP1            | 245  | 11 | 10 | 6  | 6  | 7   | 8  | 8  | 5  | 13 | 8  | 7  | 5  | 9  | 8  | 8  | 13 | 10 | 10 | 8  | 8  | 10 | 5  | 5  | 4  | 6   | 3   | 16  | 11 | 9  |    |
| ENSP00000304161          | ENSP0000        | ENSG00000172175  | MALT1           | 48   | 1  | 0  | 3  | 2  | 0   | 1  | 0  | 0  | 1  | 2  | 0  | 1  | 0  | 1  | 1  | 6  | 4  | 6  | 2  | 0  | 2  | 0  | 0  | 0  | 2   | 0   | 0   | 9  | 1  | 3  |
| ENSP00000304229          | ENSG00000169567 | HINT1            | 102             | 2    | 4  | 3  | 1  | 3  | 5   | 1  | 3  | 3  | 4  | 4  | 3  | 3  | 4  | 4  | 2  | 2  | 7  | 2  | 2  | 5  | 1  | 4  | 4  | 2  | 4   | 8   | 3   | 7  | 4  | 2  |
| ENSP00000304283          | ENSG00000169750 | RAC3             | 143             | 5    | 5  | 4  | 2  | 5  | 7   | 4  | 3  | 3  | 6  | 4  | 3  | 3  | 4  | 5  | 5  | 5  | 6  | 3  | 5  | 5  | 12 | 4  | 6  | 7  | 6   | 5   | 6   | 2  | 4  |    |
| ENSP00000304292          | ENSP0000        | ENSG00000105186  | ANKRD27         | 13   | 0  | 0  | 0  | 1  | 0   | 0  | 3  | 1  | 1  | 0  | 0  | 0  | 0  | 0  | 0  | 0  | 0  | 0  | 0  | 2  | 1  | 1  | 0  | 0  | 1   | 0   | 1   | 0  | 0  |    |
| ENSP00000304350          | ENSG00000174231 | PRPF8            | 594             | 28   | 9  | 19 | 7  | 15 | 16  | 13 | 9  | 19 | 35 | 10 | 25 | 20 | 7  | 22 | 19 | 19 | 18 | 20 | 18 | 23 | 36 | 18 | 33 | 23 | 15  | 18  | 35  | 18 | 27 |    |
| ENSP00000304350_W927R    | ENSG00000174231 | PRPF8            | 594             | 28   | 9  | 19 | 7  | 15 | 16  | 13 | 9  | 18 | 34 | 10 | 25 | 20 | 7  | 22 | 19 | 19 | 18 | 22 | 20 | 24 | 36 | 18 | 32 | 22 | 15  | 18  | 34  | 18 | 27 |    |
| ENSP00000304353          | ENSG00000172336 | POPF7            | 32              | 1    | 2  | 1  | 1  | 1  | 1   | 0  | 1  | 1  | 1  | 1  | 0  | 1  | 1  | 1  | 1  | 2  | 1  | 1  | 2  | 1  | 1  | 3  | 1  | 1  | 1   | 0   | 1   | 1  | 0  |    |
| ENSP00000304360          | ENSP0000        | ENSG00000186532  | SMYD4           | 10   | 0  | 2  | 0  | 0  | 1   | 1  | 0  | 0  | 0  | 0  | 0  | 1  | 0  | 0  | 0  | 0  | 1  | 1  | 1  | 1  | 0  | 0  | 0  | 0  | 0   | 0   | 0   | 1  | 0  | 0  |
| ENSP00000304370          | ENSP0000        | ENSG00000168438  | CDC40           | 84   | 6  | 1  | 3  | 3  | 1   | 1  | 5  | 0  | 3  | 1  | 0  | 3  | 3  | 1  | 4  | 5  | 1  | 2  | 10 | 2  | 4  | 5  | 2  | 3  | 5   | 2   | 2   | 3  | 1  | 2  |
| ENSP00000304405          | ENSP0000        | ENSG00000125944  | HNRNPFR         | 499  | 18 | 9  | 14 | 10 | 17  | 17 | 15 | 16 | 14 | 27 | 9  | 16 | 16 | 6  | 16 | 18 | 21 | 15 | 11 | 13 | 22 | 21 | 23 | 17 | 18  | 18  | 16  | 23 | 24 | 19 |
| ENSP00000304429          | ENSG00000162627 | SNX7             | 16              | 1    | 1  | 0  | 0  | 0  | 0   | 1  | 2  | 2  | 0  | 0  | 0  | 0  | 0  | 0  | 1  | 0  | 0  | 0  | 0  | 2  | 2  | 0  | 0  | 1  | 0   | 1   | 0   | 1  | 0  |    |
| ENSP00000304467          | ENSP0000        | ENSG00000172009  | THOP1           | 207  | 5  | 2  | 5  | 5  | 3   | 6  | 4  | 1  | 4  | 11 | 2  | 3  | 8  | 3  | 6  | 13 | 10 | 7  | 12 | 7  | 11 | 9  | 6  | 3  | 10  | 9   | 6   | 15 | 10 | 11 |
| ENSP00000304544          | ENSP0000        | ENSG00000170619  | COMMD5          | 10   | 0  | 0  | 0  | 1  | 1   | 0  | 0  | 0  | 0  | 0  | 0  | 0  | 0  | 0  | 0  | 0  | 0  | 1  | 2  | 0  | 0  | 0  | 0  | 1  | 1   | 2   | 1   | 0  | 0  | 0  |
| ENSP00000304592          | ENSP0000        | ENSG00000169710  | FASN            | 1884 | 83 | 52 | 62 | 62 | 102 | 71 | 68 | 39 | 61 | 34 | 14 | 21 | 47 | 47 | 49 | 81 | 66 | 93 | 62 | 62 | 59 | 51 | 34 | 31 | 156 | 121 | 105 | 56 | 41 | 54 |
| ENSP00000304604          | ENSP0000        | ENSG00000081026  | MAGI3           | 10   | 0  | 2  | 0  | 0  | 0   | 0  | 2  | 0  | 0  | 0  | 0  | 0  | 0  | 1  | 0  | 0  | 0  | 0  | 3  | 0  | 0  | 0  | 0  | 1  | 0   | 0   | 0   | 1  | 0  | 0  |
| ENSP00000304668          | ENSG00000170445 | HARS             | 488             | 21   | 15 | 10 | 14 | 26 | 17  | 15 | 11 | 11 | 17 | 8  | 11 | 10 | 12 | 9  | 15 | 19 | 16 | 19 | 18 | 13 | 19 | 15 | 9  | 19 | 23  | 14  | 35  | 27 | 20 |    |
| ENSP00000304669          | ENSP0000        | ENSG000000044115 | CTNNA1          | 1043 | 46 | 36 | 43 | 22 | 40  | 33 | 46 | 29 | 44 | 40 | 19 | 20 | 37 | 26 | 39 | 31 | 49 | 31 | 33 | 32 | 37 | 46 | 44 | 39 | 55  | 63  | 44  | 7  | 8  | 4  |
| ENSP00000304743          | ENSP0000        | ENSG00000163539  | CLASP2          | 67   | 3  | 3  | 2  | 1  | 1   | 0  | 1  | 1  | 1  | 0  | 0  | 2  | 2  | 2  | 6  | 1  | 2  | 5  | 2  | 5  | 0  | 0  | 0  | 0  | 6   | 4   | 2   | 6  | 1  | 3  |
| ENSP00000304750          | ENSP0000        | ENSG00000168781  | HISPPD2A        | 27   | 2  | 0  | 0  | 0  | 3   | 3  | 1  | 2  | 0  | 1  | 0  | 0  | 0  | 1  | 0  | 1  | 0  | 0  | 2  | 0  | 0  | 2  | 0  | 0  | 5   | 1   | 2   | 0  | 0  | 1  |
| ENSP00000304802          | ENSP0000        | ENSG00000125694  | ENSP00000304802 | 137  | 5  | 3  | 1  | 7  | 8   | 6  | 5  | 6  | 2  | 6  | 3  | 2  | 5  | 7  | 2  | 3  | 5  | 4  | 7  | 8  | 7  | 5  | 2  | 4  | 4   | 4   | 2   | 5  | 6  | 3  |
| ENSP00000304803          | ENSP0000        | ENSG00000186416  | NGRF            | 164  | 3  | 3  | 2  | 6  | 6   | 5  | 8  | 4  | 5  | 6  | 4  | 8  | 5  | 4  | 4  | 4  | 4  | 5  | 5  | 6  | 5  | 13 | 7  | 9  | 6   | 3   | 5   | 5  | 8  | 6  |
| ENSP00000304845          | ENSG00000167165 | US11A9_UGT1      | 47              | 2    | 0  | 1  | 4  | 2  | 6   | 2  | 0  | 4  | 0  | 0  | 0  | 0  | 0  | 0  | 0  | 0  | 0  | 0  | 0  | 0  | 0  | 3  | 0  | 5  | 7   | 3   | 8   | 0  | 0  | 0  |
| ENSP00000304854          | ENSG00000170584 | NUCD2C           | 53              | 2    | 1  | 2  | 1  | 1  | 1   | 1  | 1  | 0  | 4  | 1  | 1  | 2  | 2  | 1  | 2  | 2  | 3  | 1  | 4  | 1  | 2  | 1  | 1  | 3  | 4   | 3   | 5   | 1  | 0  | 0  |
| ENSP00000304855          | ENSP0000        | ENSG00000170439  | METTL7B         | 67   | 1  | 3  | 2  | 4  | 3   | 2  | 4  | 0  | 3  | 4  | 4  | 3  | 1  | 1  | 1  | 1  | 2  | 1  | 3  | 4  | 1  | 4  | 2  | 2  | 4   | 3   | 3   | 0  | 0  | 1  |
| ENSP00000304891_K62T,EN  | ENSG00000171142 | ATP6B1E2         | 28              | 4    | 1  | 1  | 0  | 0  | 0   | 1  | 1  | 2  | 0  | 1  | 1  | 0  | 0  | 1  | 1  | 0  | 0  | 2  | 1  | 2  | 1  | 2  | 1  | 0  | 1   | 0   | 0   | 2  | 1  | 1  |
| ENSP00000304903          | ENSP0000        | ENSG00000169217  | CD2BP2          | 29   | 3  | 0  | 0  | 0  | 0   | 1  | 0  | 0  | 1  | 3  | 0  | 0  | 0  | 1  | 0  | 2  | 0  | 3  | 0  | 1  | 3  | 2  | 0  | 1  | 1   | 1   | 1   | 3  | 1  | 1  |
| ENSP00000304997          | ENSG00000170855 | TRIP1A           | 36              | 0    | 1  | 1  | 0  | 0  | 0   | 1  | 1  | 0  | 0  | 2  | 1  | 0  | 1  | 1  | 3  | 0  | 2  | 1  | 1  | 1  | 1  | 2  | 4  | 2  | 2   | 2   | 2   | 1  | 1  | 1  |
| ENSP00000305027          | ENSG00000168502 | KIAA0802         | 19              | 2    | 0  | 0  | 0  | 1  | 1   | 0  | 2  | 0  | 1  | 0  | 0  | 0  | 0  | 1  | 2  | 0  | 1  | 3  | 3  | 0  | 0  | 0  | 0  | 0  | 0   | 0   | 0   | 0  | 0  | 1  |
| ENSP00000305056          | ENSP0000        | ENSG00000140479  | PKCS6           | 12   | 1  | 0  | 0  | 2  | 1   | 0  | 1  |    |    |    |    |    |    |    |    |    |    |    |    |    |    |    |    |    |     |     |     |    |    |    |

[illegible]

|                                                                       |                 |                                 |      |    |    |    |    |    |    |    |    |    |    |    |    |    |    |    |    |    |    |    |    |    |    |    |    |    |    |    |    |    |    |   |
|-----------------------------------------------------------------------|-----------------|---------------------------------|------|----|----|----|----|----|----|----|----|----|----|----|----|----|----|----|----|----|----|----|----|----|----|----|----|----|----|----|----|----|----|---|
| ENSP00000309175                                                       | ENSG00000175376 | E1F1AD                          | 30   | 2  | 2  | 0  | 1  | 1  | 2  | 2  | 0  | 0  | 0  | 0  | 0  | 2  | 2  | 0  | 2  | 1  | 0  | 1  | 1  | 0  | 2  | 2  | 1  | 2  | 1  | 0  | 1  | 1  | 1  |   |
| ENSP00000309198,ENSP00000309252,ENSP00000309262,R600W,ENSG00000090686 | ENSG00000099335 | UBEC3                           | 69   | 1  | 2  | 3  | 3  | 4  | 1  | 4  | 1  | 3  | 2  | 0  | 1  | 1  | 0  | 0  | 3  | 2  | 3  | 4  | 3  | 2  | 3  | 1  | 1  | 1  | 4  | 2  | 4  | 5  | 1  | 4 |
| ENSP00000309297                                                       | ENSG00000152268 | CLTB                            | 10   | 0  | 2  | 0  | 0  | 1  | 1  | 1  | 0  | 0  | 0  | 0  | 1  | 0  | 0  | 0  | 0  | 1  | 1  | 0  | 1  | 0  | 1  | 0  | 0  | 0  | 0  | 0  | 0  | 1  | 0  |   |
| ENSP00000309298                                                       | ENSG00000158987 | USP48                           | 55   | 3  | 1  | 2  | 2  | 2  | 3  | 2  | 0  | 2  | 1  | 1  | 2  | 2  | 0  | 1  | 4  | 2  | 2  | 2  | 2  | 0  | 1  | 1  | 4  | 0  | 3  | 1  | 2  | 3  | 2  | 2 |
| ENSP00000309301,ENSP00000309302,ENSP00000309310                       | ENSG00000158987 | SPON1                           | 19   | 5  | 1  | 1  | 0  | 0  | 0  | 0  | 0  | 0  | 0  | 0  | 0  | 0  | 0  | 0  | 0  | 0  | 0  | 0  | 0  | 0  | 0  | 0  | 4  | 4  | 0  | 0  | 0  | 0  | 0  |   |
| ENSP00000309301,ENSP00000309302,ENSP00000309310                       | ENSG00000158987 | RAPGEF6                         | 28   | 1  | 1  | 0  | 4  | 1  | 1  | 3  | 1  | 0  | 0  | 0  | 0  | 0  | 1  | 1  | 0  | 2  | 0  | 2  | 0  | 1  | 0  | 1  | 0  | 0  | 2  | 2  | 1  | 1  | 1  |   |
| ENSP00000309301,ENSP00000309302,ENSP00000309310                       | ENSG00000158987 | ZCXHC1                          | 38   | 3  | 3  | 2  | 0  | 1  | 2  | 0  | 1  | 1  | 1  | 1  | 1  | 0  | 1  | 2  | 0  | 3  | 0  | 2  | 0  | 1  | 2  | 4  | 2  | 0  | 1  | 3  | 0  | 0  | 1  |   |
| ENSP00000309301,ENSP00000309302,ENSP00000309310                       | ENSG00000158987 | FBXL11                          | 63   | 2  | 5  | 3  | 2  | 0  | 1  | 4  | 3  | 1  | 2  | 3  | 1  | 3  | 3  | 2  | 1  | 1  | 3  | 4  | 3  | 3  | 3  | 1  | 0  | 1  | 2  | 1  | 1  | 3  | 1  |   |
| ENSP00000309301,ENSP00000309302,ENSP00000309310                       | ENSG00000158987 | RPL15P22,RPL                    | 181  | 8  | 2  | 6  | 2  | 8  | 4  | 5  | 3  | 7  | 4  | 2  | 4  | 5  | 3  | 7  | 6  | 10 | 13 | 3  | 8  | 6  | 7  | 4  | 5  | 10 | 6  | 8  | 11 | 6  | 8  |   |
| ENSP00000309415                                                       | ENSG00000175416 | CLTB                            | 171  | 5  | 7  | 3  | 4  | 5  | 4  | 4  | 6  | 2  | 4  | 8  | 4  | 2  | 11 | 8  | 2  | 7  | 7  | 4  | 10 | 2  | 10 | 14 | 3  | 8  | 5  | 4  | 4  | 7  | 7  |   |
| ENSP00000309417,ENSP00000309428                                       | ENSG00000092108 | SCFD1                           | 164  | 10 | 2  | 7  | 5  | 6  | 5  | 5  | 3  | 4  | 4  | 2  | 3  | 4  | 1  | 8  | 7  | 8  | 6  | 4  | 3  | 3  | 12 | 5  | 7  | 12 | 10 | 12 | 3  | 0  | 3  |   |
| ENSP00000309428                                                       | ENSG00000105221 | AKT2                            | 58   | 2  | 0  | 2  | 6  | 5  | 4  | 3  | 0  | 0  | 1  | 0  | 1  | 2  | 1  | 2  | 5  | 1  | 2  | 1  | 1  | 4  | 1  | 0  | 1  | 3  | 3  | 0  | 2  | 0  | 5  |   |
| ENSP00000309430,ENSP00000309433                                       | ENSG00000087111 | PIGS                            | 28   | 2  | 0  | 2  | 2  | 0  | 2  | 2  | 0  | 1  | 0  | 0  | 2  | 0  | 0  | 1  | 0  | 0  | 3  | 2  | 0  | 1  | 1  | 0  | 1  | 4  | 1  | 1  | 0  | 0  | 0  |   |
| ENSP00000309433                                                       | ENSG00000173113 | ENSP00000309433                 | 101  | 3  | 11 | 2  | 1  | 4  | 3  | 1  | 2  | 5  | 3  | 7  | 0  | 1  | 6  | 2  | 3  | 3  | 2  | 1  | 5  | 3  | 3  | 6  | 2  | 4  | 3  | 3  | 6  | 3  | 3  |   |
| ENSP00000309438,ENSP00000309439                                       | ENSG00000141959 | PFKL                            | 92   | 6  | 2  | 3  | 1  | 2  | 1  | 2  | 4  | 2  | 4  | 0  | 1  | 3  | 1  | 2  | 2  | 2  | 4  | 4  | 1  | 2  | 7  | 1  | 1  | 15 | 6  | 8  | 1  | 2  | 2  |   |
| ENSP00000309439                                                       | ENSG00000170689 | HOXB9                           | 18   | 0  | 0  | 0  | 0  | 0  | 0  | 0  | 0  | 0  | 0  | 0  | 2  | 0  | 1  | 2  | 1  | 2  | 0  | 4  | 1  | 2  | 0  | 1  | 0  | 0  | 0  | 0  | 0  | 2  | 2  |   |
| ENSP00000309463,ENSP00000309464                                       | ENSG00000175536 | ENSP00000309463,ENSP00000309464 | 14   | 1  | 1  | 1  | 0  | 1  | 0  | 2  | 1  | 1  | 1  | 0  | 1  | 0  | 0  | 1  | 0  | 0  | 0  | 0  | 0  | 0  | 0  | 1  | 0  | 2  | 0  | 0  | 0  | 0  | 0  |   |
| ENSP00000309474,ENSP00000309477,ENSP00000309482,ENSP00000309483       | ENSG00000173692 | PSMD1                           | 519  | 27 | 13 | 19 | 8  | 13 | 11 | 9  | 10 | 15 | 25 | 9  | 6  | 19 | 14 | 17 | 19 | 15 | 16 | 14 | 25 | 18 | 12 | 8  | 12 | 35 | 33 | 12 | 38 | 27 | 20 |   |
| ENSP00000309477,ENSP00000309482,ENSP00000309483                       | ENSG00000122729 | AC01                            | 131  | 4  | 3  | 8  | 3  | 2  | 5  | 3  | 4  | 7  | 2  | 0  | 0  | 3  | 3  | 2  | 6  | 4  | 5  | 5  | 6  | 3  | 1  | 0  | 11 | 4  | 8  | 13 | 4  | 7  |    |   |
| ENSP00000309482,ENSP00000309483                                       | ENSG00000173889 | PHC3                            | 42   | 2  | 1  | 1  | 1  | 1  | 1  | 1  | 2  | 2  | 2  | 0  | 1  | 1  | 1  | 2  | 2  | 1  | 1  | 1  | 2  | 1  | 3  | 2  | 1  | 2  | 1  | 1  | 2  | 2  | 1  |   |
| ENSP00000309503,ENSP00000309539,G543D,ENSG00000092964                 | ENSG00000164924 | YWHAZ                           | 1265 | 40 | 24 | 38 | 53 | 85 | 54 | 41 | 28 | 37 | 37 | 15 | 19 | 30 | 31 | 38 | 30 | 74 | 55 | 51 | 60 | 46 | 32 | 29 | 26 | 47 | 43 | 39 | 63 | 49 | 51 |   |
| ENSP00000309539,G543D,ENSG00000092964                                 | ENSG00000092964 | DPVSL2                          | 446  | 17 | 15 | 21 | 17 | 23 | 18 | 4  | 1  | 6  | 21 | 9  | 16 | 21 | 11 | 15 | 12 | 9  | 11 | 19 | 23 | 21 | 14 | 8  | 11 | 27 | 34 | 23 | 7  | 5  | 7  |   |
| ENSP00000309555,ENSP00000309558,ENSP00000309561,ENSP00000309565       | ENSG00000172534 | HCF1                            | 108  | 3  | 2  | 4  | 2  | 3  | 6  | 6  | 4  | 3  | 5  | 4  | 3  | 3  | 2  | 2  | 2  | 4  | 4  | 5  | 4  | 6  | 5  | 5  | 4  | 2  | 3  | 1  | 4  | 4  | 3  |   |
| ENSP00000309558,ENSP00000309561,ENSP00000309565                       | ENSG00000172660 | TAF15                           | 253  | 9  | 10 | 4  | 7  | 12 | 6  | 9  | 5  | 12 | 10 | 7  | 8  | 8  | 14 | 4  | 7  | 11 | 10 | 7  | 8  | 9  | 9  | 8  | 5  | 6  | 12 | 10 | 9  | 9  | 8  |   |
| ENSP00000309561,ENSP00000309565                                       | ENSG00000174917 | C19orf70                        | 18   | 0  | 0  | 0  | 0  | 2  | 2  | 0  | 0  | 1  | 2  | 0  | 0  | 0  | 1  | 2  | 1  | 1  | 1  | 0  | 1  | 1  | 0  | 1  | 0  | 0  | 0  | 1  | 1  | 0  | 0  |   |
| ENSP00000309565                                                       | ENSG00000173660 | UQRH1                           | 125  | 9  | 4  | 3  | 1  | 1  | 5  | 3  | 3  | 5  | 10 | 4  | 2  | 1  | 3  | 4  | 1  | 2  | 6  | 3  | 4  | 4  | 11 | 3  | 7  | 7  | 2  | 6  | 5  | 4  | 2  |   |
| ENSP00000309595,ENSP00000309600,ENSP00000309601                       | ENSG00000107815 | PEO1,C10orf2                    | 21   | 1  | 0  | 0  | 0  | 0  | 0  | 1  | 2  | 0  | 0  | 0  | 0  | 0  | 0  | 1  | 1  | 1  | 1  | 0  | 0  | 1  | 1  | 0  | 2  | 2  | 2  | 1  | 2  | 1  | 1  |   |
| ENSP00000309600,ENSP00000309601,ENSP00000309602                       | ENSG00000079950 | STX7                            | 84   | 3  | 3  | 3  | 3  | 1  | 2  | 3  | 4  | 3  | 5  | 2  | 4  | 1  | 1  | 3  | 3  | 2  | 1  | 4  | 5  | 2  | 4  | 4  | 5  | 3  | 1  | 4  | 4  | 1  | 0  |   |
| ENSP00000309629,ENSP00000309643,R108Q,ENSG00000145919                 | ENSG00000172757 | CFL1                            | 528  | 21 | 8  | 25 | 11 | 15 | 21 | 18 | 15 | 24 | 26 | 4  | 13 | 15 | 10 | 15 | 19 | 10 | 20 | 15 | 12 | 22 | 21 | 5  | 15 | 35 | 18 | 31 | 28 | 15 | 21 |   |
| ENSP00000309643,R108Q,ENSG00000145919                                 | ENSG00000173786 | CNP                             | 128  | 5  | 3  | 6  | 3  | 2  | 5  | 2  | 3  | 5  | 9  | 3  | 3  | 5  | 3  | 4  | 4  | 3  | 5  | 5  | 7  | 6  | 4  | 1  | 2  | 8  | 4  | 4  | 8  | 2  | 4  |   |
| ENSP00000309643,R108Q,ENSG00000145919                                 | ENSG00000173786 | CNP                             | 130  | 5  | 3  | 6  | 3  | 2  | 5  | 2  | 3  | 4  | 9  | 3  | 5  | 3  | 3  | 4  | 4  | 3  | 5  | 5  | 7  | 6  | 4  | 1  | 2  | 8  | 4  | 4  | 9  | 3  | 5  |   |
| ENSP00000309644                                                       | ENSG00000145919 | BOD1                            | 27   | 2  | 2  | 1  | 0  | 0  | 1  | 1  | 0  | 1  | 2  | 2  | 1  | 1  | 2  | 0  | 1  | 1  | 1  | 0  | 1  | 1  | 0  | 2  | 0  | 1  | 1  | 0  | 1  | 1  | 0  |   |
| ENSP00000309689,ENSP00000309714,ENSP00000309715                       | ENSG00000077454 | LRCH4                           | 21   | 1  | 0  | 0  | 0  | 0  | 0  | 1  | 3  | 3  | 1  | 1  | 0  | 2  | 0  | 1  | 0  | 0  | 0  | 1  | 1  | 0  | 2  | 0  | 0  | 1  | 1  | 0  | 1  | 1  | 0  |   |
| ENSP00000309714,ENSP00000309715                                       | ENSG00000174705 | SH3PXD2B                        | 22   | 1  | 1  | 0  | 0  | 0  | 0  | 0  | 0  | 0  | 0  | 0  | 0  | 0  | 1  | 0  | 2  | 2  | 2  | 0  | 1  | 2  | 0  | 0  | 0  | 0  | 1  | 4  | 3  | 2  |    |   |
| ENSP00000309823,ENSP00000309824                                       | ENSG00000137166 | FOXPA                           | 15   | 1  | 1  | 1  | 4  | 3  | 2  | 0  | 0  | 2  | 0  | 0  | 0  | 0  | 0  | 0  | 0  | 0  | 0  | 0  | 0  | 0  | 0  | 0  | 0  | 0  | 1  | 0  | 0  | 0  | 0  |   |
| ENSP00000309830                                                       | ENSG00000172809 | RPL38                           | 88   | 4  | 1  | 3  | 0  | 3  | 3  | 1  | 0  | 2  | 3  | 0  | 2  | 3  | 1  | 4  | 4  | 7  | 3  | 1  | 8  | 4  | 4  | 2  | 2  | 6  | 7  | 1  | 3  | 4  | 2  |   |
| ENSP00000309871,ENSP00000309883,ENSP00000309893                       | ENSG00000161800 | RACGAP1P,RA                     | 52   | 4  | 5  | 1  | 2  | 2  | 0  | 0  | 1  | 3  | 1  | 3  | 1  | 2  | 2  | 1  | 1  | 0  | 1  | 1  | 4  | 1  | 4  | 4  | 2  | 1  | 0  | 0  | 1  | 3  | 1  |   |
| ENSP00000309883,ENSP00000309893                                       | ENSG00000173905 | GOLIM4                          | 58   | 0  | 0  | 1  | 2  | 1  | 2  | 4  | 3  | 5  | 1  | 2  | 3  | 1  | 2  | 0  | 0  | 1  | 2  | 1  | 1  | 4  | 4  | 3  | 2  | 5  | 4  | 4  | 0  | 0  | 3  |   |
| ENSP00000309923,ENSP00000309924                                       | ENSG00000112526 | ENSP00000309923,ENSP00000309924 | 48   | 0  | 1  | 1  | 2  | 1  | 0  | 2  | 1  | 0  | 2  | 1  | 3  | 2  | 2  | 3  | 4  | 1  | 3  | 1  | 3  | 2  | 1  | 2  | 2  | 2  | 2  | 1  | 0  | 1  | 2  |   |
| ENSP00000310040,ENSP00000310042,ENSP00000310043                       | ENSG00000175390 | E1F3F                           | 82   | 3  | 1  | 6  | 2  | 3  | 3  | 3  | 1  | 2  | 1  | 0  | 2  | 2  | 3  | 6  | 1  | 2  | 6  | 3  | 3  | 5  | 2  | 0  | 1  | 3  | 2  | 5  | 2  | 7  | 2  |   |
| ENSP00000310042,ENSP00000310043                                       | ENSG00000173545 | ZNF622                          | 38   | 2  | 1  | 2  | 0  | 2  | 0  | 2  | 0  | 2  | 0  | 2  | 0  | 2  | 0  | 2  | 3  | 2  | 1  | 0  | 2  | 1  | 1  | 1  | 1  | 1  | 2  | 1  | 3  | 2  | 2  |   |
| ENSP00000310088,ENSP00000310094,ENSP00000310099                       | ENSG00000159335 | PTMS                            | 86   | 4  | 3  | 5  | 1  | 1  | 1  | 2  | 1  | 3  | 5  | 8  | 2  | 1  | 2  | 1  | 7  | 7  | 4  | 2  | 2  | 2  | 3  | 1  | 1  | 3  | 5  | 1  | 4  | 3  | 1  |   |
| ENSP00000310094,ENSP00000310099                                       | ENSG00000149930 | TAOK2                           | 28   | 2  | 2  | 1  | 3  | 1  | 0  | 2  | 0  | 1  | 1  | 0  | 0  | 1  | 1  | 0  | 0  | 1  | 3  | 1  | 2  | 1  | 1  | 1  | 0  | 1  | 1  | 0  | 0  | 1  | 2  |   |
| ENSP00000310109,ENSP00000310117                                       | ENSG00000124831 | LRFRP1                          | 65   | 1  | 2  | 1  | 0  | 0  | 1  | 1  | 3  | 6  | 3  | 0  | 3  | 2  | 2  | 5  | 1  | 1  | 3  | 1  | 0  | 3  | 4  | 2  | 3  | 5  | 1  | 4  | 3  | 0  | 4  |   |
| ENSP00000310117                                                       | ENSG00000173457 | PPP1R14B                        | 49   | 1  | 2  | 3  | 1  | 0  | 2  | 0  | 0  | 1  | 1  | 1  | 0  | 1  | 2  | 1  | 2  | 4  | 3  | 1  | 1  | 4  | 0  | 1  | 0  | 5  | 2  | 2  | 3  | 2  | 3  |   |
| ENSP00000310127,ENSP00000310129,ENSP00000310130                       | ENSG00000126456 | IRF3                            | 30   | 3  | 2  | 1  | 2  | 3  | 1  | 2  | 0  | 1  | 1  | 1  | 1  | 0  | 1  | 1  | 0  | 0  | 1  | 2  | 1  | 1  | 1  | 0  | 0  | 1  | 0  | 1  | 1  | 1  | 1  |   |
| ENSP00000310129,ENSP00000310130                                       | ENSG00000175166 | PSMD2                           | 365  | 17 | 5  | 10 | 5  | 4  | 8  | 7  | 6  | 12 | 23 | 1  | 8  | 8  | 2  | 10 | 13 | 12 | 14 | 12 | 15 | 13 | 17 | 4  | 9  | 25 | 11 | 11 | 34 | 22 | 27 |   |
| ENSP00000310227,ENSP00000310275                                       | ENSG00000175216 | CANP5                           | 466  | 21 | 29 | 16 | 17 | 14 | 12 | 17 | 16 | 9  | 17 | 7  | 17 | 11 | 20 | 16 | 23 | 1  |    |    |    |    |    |    |    |    |    |    |    |    |    |   |

|                                         |                 |            |     |    |    |    |    |    |    |    |    |    |    |    |    |    |    |    |    |    |    |    |    |    |    |    |    |    |    |    |    |    |    |   |
|-----------------------------------------|-----------------|------------|-----|----|----|----|----|----|----|----|----|----|----|----|----|----|----|----|----|----|----|----|----|----|----|----|----|----|----|----|----|----|----|---|
| ENSP0000031648,ENSP000                  | ENSG00000174607 | UGT8       | 47  | 1  | 1  | 0  | 2  | 4  | 2  | 3  | 1  | 1  | 2  | 0  | 1  | 1  | 0  | 1  | 1  | 0  | 1  | 2  | 4  | 2  | 3  | 1  | 2  | 4  | 1  | 2  | 1  | 1  | 2  |   |
| ENSP0000031656,ENSP000                  | ENSG00000214882 | CCP41      | 76  | 8  | 1  | 1  | 5  | 5  | 7  | 6  | 3  | 2  | 0  | 0  | 0  | 1  | 2  | 2  | 1  | 1  | 2  | 2  | 0  | 0  | 1  | 11 | 3  | 3  | 3  | 1  | 0  | 0  | 1  | 2 |
| ENSP0000031665,ENSP000                  | ENSG00000175575 | PAAG1      | 23  | 2  | 1  | 1  | 1  | 1  | 2  | 1  | 1  | 0  | 1  | 0  | 0  | 1  | 0  | 0  | 2  | 1  | 0  | 1  | 1  | 0  | 1  | 1  | 0  | 1  | 1  | 0  | 2  | 0  | 0  |   |
| ENSP0000031677                          | ENSG00000117751 | PHD1R      | 64  | 2  | 1  | 2  | 1  | 1  | 2  | 2  | 1  | 3  | 3  | 1  | 0  | 2  | 2  | 2  | 1  | 4  | 2  | 3  | 3  | 2  | 3  | 2  | 3  | 4  | 3  | 1  | 5  | 1  | 2  |   |
| ENSP0000031700,ENSP000                  | ENSG00000173575 | CHD2       | 83  | 2  | 2  | 1  | 2  | 3  | 2  | 5  | 2  | 2  | 1  | 2  | 4  | 2  | 2  | 5  | 4  | 7  | 5  | 5  | 4  | 2  | 6  | 2  | 3  | 1  | 1  | 1  | 2  | 1  | 2  |   |
| ENSP0000031713,ENSP000                  | ENSG00000172939 | OXSR1      | 127 | 5  | 1  | 6  | 4  | 4  | 3  | 2  | 2  | 3  | 6  | 0  | 3  | 5  | 0  | 6  | 4  | 3  | 6  | 5  | 1  | 5  | 8  | 1  | 6  | 11 | 6  | 7  | 7  | 3  | 4  |   |
| ENSP0000031740                          | ENSG00000213496 | NDUFA11    | 43  | 1  | 0  | 1  | 2  | 1  | 2  | 2  | 0  | 3  | 3  | 0  | 1  | 1  | 0  | 1  | 1  | 1  | 2  | 1  | 0  | 2  | 3  | 0  | 3  | 3  | 0  | 3  | 4  | 0  | 2  |   |
| ENSP0000031746_rs20756f                 | ENSG00000129451 | KLK10      | 13  | 0  | 0  | 0  | 0  | 0  | 2  | 3  | 2  | 2  | 0  | 0  | 0  | 1  | 0  | 0  | 0  | 1  | 0  | 1  | 0  | 0  | 0  | 0  | 1  | 0  | 0  | 0  | 0  | 0  | 0  |   |
| ENSP0000031747,ENSP000                  | ENSG00000173933 | RBM14,RBM4 | 91  | 6  | 1  | 2  | 2  | 3  | 3  | 6  | 5  | 2  | 4  | 1  | 3  | 6  | 1  | 2  | 2  | 4  | 2  | 2  | 2  | 4  | 6  | 1  | 3  | 4  | 3  | 2  | 3  | 3  | 3  |   |
| ENSP0000031750,ENSP000                  | ENSG00000174227 | PIGG       | 14  | 0  | 0  | 0  | 3  | 2  | 1  | 0  | 1  | 0  | 0  | 0  | 1  | 0  | 0  | 1  | 0  | 0  | 0  | 1  | 1  | 0  | 0  | 0  | 0  | 0  | 0  | 3  | 0  | 0  | 0  |   |
| ENSP0000031825,ENSP000                  | ENSG00000175029 | CTBP2      | 159 | 7  | 3  | 4  | 5  | 6  | 6  | 5  | 3  | 2  | 6  | 3  | 4  | 9  | 7  | 6  | 5  | 8  | 5  | 7  | 7  | 5  | 7  | 2  | 2  | 9  | 8  | 6  | 4  | 3  | 5  |   |
| ENSP0000031842                          | ENSG00000175348 | TMEM9B     | 20  | 3  | 0  | 0  | 1  | 1  | 2  | 1  | 0  | 0  | 2  | 0  | 0  | 1  | 0  | 2  | 0  | 0  | 2  | 1  | 1  | 0  | 1  | 0  | 0  | 0  | 0  | 1  | 0  | 0  | 1  |   |
| ENSP0000031866,ENSP000                  | ENSG00000141378 | PTRH2      | 105 | 5  | 0  | 3  | 1  | 2  | 5  | 1  | 3  | 3  | 7  | 0  | 4  | 3  | 0  | 5  | 7  | 3  | 7  | 3  | 3  | 3  | 5  | 0  | 4  | 6  | 4  | 4  | 6  | 3  | 5  |   |
| ENSP0000031876                          | ENSG00000113552 | GNPDA1     | 130 | 5  | 2  | 4  | 6  | 7  | 4  | 3  | 1  | 2  | 6  | 2  | 3  | 2  | 0  | 4  | 4  | 7  | 3  | 4  | 3  | 3  | 6  | 1  | 2  | 7  | 10 | 5  | 10 | 8  | 6  |   |
| ENSP0000031888,ENSP000                  | ENSG00000131446 | MGAT1      | 17  | 3  | 1  | 1  | 2  | 0  | 2  | 0  | 1  | 1  | 0  | 0  | 0  | 0  | 0  | 0  | 0  | 0  | 2  | 0  | 0  | 1  | 2  | 0  | 0  | 1  | 0  | 0  | 0  | 0  | 0  |   |
| ENSP0000031930_rs11304;ENSG00000105379  | ETFB            | 480        | 22  | 17 | 13 | 13 | 28 | 17 | 21 | 20 | 10 | 19 | 14 | 12 | 16 | 13 | 11 | 10 | 12 | 9  | 12 | 21 | 15 | 18 | 20 | 12 | 23 | 29 | 15 | 13 | 16 | 9  |    |   |
| ENSP0000031977                          | ENSG00000141994 | UDSL3L     | 60  | 1  | 4  | 1  | 1  | 2  | 1  | 2  | 0  | 0  | 5  | 1  | 1  | 1  | 1  | 2  | 2  | 4  | 3  | 2  | 2  | 1  | 4  | 2  | 3  | 0  | 1  | 0  | 3  | 6  | 4  |   |
| ENSP0000031984,ENSP000                  | ENSG00000213995 | CARDK      | 19  | 1  | 0  | 1  | 3  | 2  | 2  | 2  | 0  | 0  | 0  | 0  | 1  | 0  | 0  | 0  | 1  | 1  | 1  | 0  | 0  | 0  | 0  | 0  | 1  | 0  | 1  | 0  | 0  | 0  | 1  |   |
| ENSP00000312042_rs11891;ENSG00000115677 | HLDBP           | 577        | 34  | 21 | 23 | 19 | 14 | 16 | 26 | 18 | 25 | 13 | 2  | 6  | 24 | 16 | 19 | 19 | 23 | 17 | 34 | 26 | 34 | 28 | 13 | 10 | 27 | 21 | 19 | 11 | 9  | 10 |    |   |
| ENSP00000312059,ENSP000                 | ENSG00000173744 | AGF1G      | 23  | 0  | 1  | 2  | 0  | 1  | 1  | 1  | 0  | 0  | 0  | 0  | 0  | 1  | 0  | 1  | 1  | 2  | 1  | 2  | 0  | 1  | 1  | 0  | 0  | 1  | 1  | 0  | 2  | 2  | 1  |   |
| ENSP00000312066                         | ENSG00000167881 | SRPF8      | 352 | 18 | 13 | 9  | 10 | 11 | 10 | 13 | 8  | 8  | 10 | 3  | 7  | 10 | 10 | 9  | 11 | 21 | 12 | 16 | 15 | 9  | 18 | 10 | 8  | 17 | 12 | 11 | 20 | 12 | 11 |   |
| ENSP00000312081,ENSP000                 | ENSG00000172830 | SSH3       | 66  | 4  | 1  | 2  | 3  | 3  | 2  | 4  | 5  | 5  | 0  | 0  | 0  | 0  | 0  | 1  | 3  | 5  | 1  | 1  | 2  | 0  | 4  | 3  | 0  | 2  | 3  | 3  | 3  | 3  | 3  |   |
| ENSP00000312122,ENSP000                 | ENSG00000157020 | SEC13      | 80  | 7  | 1  | 3  | 2  | 3  | 3  | 1  | 2  | 5  | 5  | 0  | 1  | 0  | 0  | 3  | 1  | 3  | 1  | 1  | 1  | 2  | 5  | 0  | 4  | 9  | 4  | 5  | 5  | 0  | 3  |   |
| ENSP00000312143,ENSP000                 | ENSG00000136205 | TNS3       | 61  | 6  | 4  | 8  | 3  | 0  | 2  | 5  | 1  | 2  | 0  | 0  | 1  | 5  | 3  | 3  | 0  | 0  | 0  | 4  | 5  | 2  | 2  | 1  | 2  | 0  | 1  | 1  | 0  | 0  | 0  |   |
| ENSP00000312189,ENSP000                 | ENSG00000205560 | CTP1B      | 19  | 0  | 0  | 0  | 1  | 2  | 1  | 1  | 0  | 0  | 2  | 0  | 0  | 0  | 0  | 0  | 1  | 1  | 0  | 1  | 0  | 1  | 2  | 1  | 1  | 2  | 1  | 0  | 0  | 0  | 1  |   |
| ENSP00000312206_Y511C,V;ENSG00000186442 | KRT3            | 23         | 0   | 0  | 0  | 0  | 0  | 0  | 0  | 0  | 0  | 0  | 10 | 3  | 5  | 0  | 0  | 0  | 1  | 0  | 0  | 0  | 0  | 0  | 0  | 1  | 1  | 1  | 0  | 0  | 0  | 0  | 0  |   |
| ENSP00000312235,ENSP000                 | ENSG00000173702 | MUC13      | 77  | 0  | 0  | 0  | 3  | 16 | 11 | 4  | 4  | 5  | 0  | 0  | 0  | 0  | 0  | 1  | 0  | 0  | 0  | 0  | 0  | 0  | 0  | 5  | 9  | 6  | 5  | 5  | 3  | 0  | 0  | 0 |
| ENSP00000312250,ENSP000                 | ENSG00000159322 | ADPQG      | 15  | 1  | 0  | 0  | 0  | 0  | 0  | 1  | 1  | 2  | 1  | 0  | 0  | 0  | 0  | 0  | 1  | 2  | 0  | 0  | 1  | 0  | 1  | 1  | 0  | 0  | 0  | 0  | 0  | 2  | 0  | 1 |
| ENSP00000312262                         | ENSG00000173020 | ADRBK1     | 53  | 0  | 2  | 1  | 8  | 3  | 4  | 2  | 2  | 1  | 2  | 0  | 0  | 0  | 1  | 2  | 0  | 2  | 2  | 3  | 1  | 1  | 1  | 0  | 0  | 4  | 5  | 3  | 1  | 0  | 1  |   |
| ENSP00000312283,ENSP000                 | ENSG00000170231 | FABP6      | 10  | 0  | 0  | 0  | 2  | 1  | 0  | 1  | 0  | 0  | 0  | 0  | 0  | 0  | 0  | 0  | 1  | 0  | 1  | 0  | 0  | 0  | 0  | 0  | 0  | 1  | 2  | 1  | 0  | 0  | 0  |   |
| ENSP00000312304                         | ENSG00000137364 | TBMPT      | 63  | 6  | 0  | 1  | 5  | 3  | 0  | 4  | 2  | 2  | 0  | 0  | 0  | 1  | 2  | 0  | 0  | 3  | 3  | 1  | 2  | 1  | 0  | 3  | 0  | 10 | 6  | 4  | 2  | 1  | 1  |   |
| ENSP00000312311,ENSP000                 | ENSG00000173867 | MRPL46     | 34  | 0  | 1  | 1  | 1  | 1  | 2  | 1  | 2  | 1  | 1  | 1  | 0  | 1  | 1  | 1  | 1  | 2  | 1  | 1  | 1  | 1  | 1  | 3  | 2  | 1  | 1  | 1  | 1  | 1  | 1  |   |
| ENSP00000312318                         | ENSG00000173465 | SSSCA1     | 37  | 0  | 1  | 1  | 2  | 0  | 0  | 0  | 0  | 1  | 0  | 2  | 0  | 1  | 1  | 4  | 1  | 2  | 3  | 2  | 2  | 4  | 2  | 2  | 0  | 2  | 1  | 0  | 1  | 2  | 1  |   |
| ENSP00000312331,ENSP000                 | ENSG00000131037 | EGSML1     | 59  | 6  | 6  | 5  | 0  | 0  | 0  | 10 | 11 | 10 | 0  | 0  | 0  | 1  | 2  | 1  | 0  | 0  | 0  | 0  | 0  | 1  | 1  | 2  | 1  | 1  | 1  | 0  | 0  | 0  | 0  |   |
| ENSP00000312356                         | ENSG00000174173 | RPGMTD1    | 170 | 5  | 4  | 3  | 3  | 5  | 4  | 7  | 8  | 4  | 9  | 1  | 5  | 2  | 4  | 7  | 8  | 6  | 8  | 6  | 8  | 9  | 4  | 8  | 8  | 4  | 3  | 8  | 6  | 5  | 0  |   |
| ENSP00000312370,ENSP000                 | ENSG00000044286 | AIFM2      | 51  | 1  | 2  | 2  | 4  | 3  | 2  | 2  | 1  | 1  | 1  | 1  | 0  | 2  | 1  | 1  | 1  | 2  | 1  | 2  | 2  | 1  | 2  | 2  | 2  | 2  | 2  | 2  | 2  | 2  | 1  |   |
| ENSP00000312395,ENSP000                 | ENSG00000214298 |            | 50  | 2  | 0  | 1  | 2  | 4  | 0  | 2  | 0  | 2  | 3  | 1  | 0  | 1  | 0  | 1  | 3  | 5  | 0  | 1  | 1  | 2  | 2  | 4  | 2  | 1  | 4  | 0  | 3  | 3  | 1  |   |
| ENSP00000312419,ENSP000                 | ENSG00000111642 | CHD4       | 586 | 35 | 27 | 16 | 19 | 13 | 13 | 18 | 9  | 20 | 39 | 22 | 15 | 12 | 12 | 18 | 13 | 14 | 18 | 24 | 25 | 15 | 26 | 17 | 23 | 25 | 15 | 22 | 24 | 21 | 16 |   |
| ENSP00000312435,ENSP000                 | ENSG00000173402 | DAG1       | 68  | 5  | 1  | 5  | 2  | 0  | 1  | 4  | 1  | 4  | 2  | 0  | 2  | 2  | 5  | 1  | 5  | 3  | 1  | 1  | 6  | 4  | 5  | 2  | 0  | 0  | 3  | 0  | 0  | 2  | 1  | 2 |
| ENSP00000312442,ENSP000                 | ENSG00000213983 | AP1G2      | 39  | 0  | 2  | 0  | 5  | 5  | 2  | 3  | 2  | 1  | 0  | 0  | 0  | 0  | 1  | 1  | 0  | 0  | 1  | 2  | 1  | 0  | 0  | 0  | 1  | 0  | 5  | 4  | 2  | 0  | 0  | 0 |
| ENSP00000312523,ENSP000                 | ENSG00000153113 | CAST       | 316 | 21 | 10 | 15 | 4  | 5  | 9  | 1  | 3  | 6  | 17 | 2  | 6  | 8  | 7  | 16 | 6  | 14 | 14 | 3  | 7  | 10 | 19 | 5  | 15 | 28 | 11 | 11 | 21 | 9  | 13 |   |
| ENSP00000312530,ENSP000                 | ENSG00000105176 | C19orf2    | 63  | 1  | 2  | 1  | 3  | 1  | 1  | 1  | 4  | 2  | 2  | 0  | 2  | 0  | 1  | 3  | 1  | 3  | 4  | 4  | 5  | 3  | 2  | 1  | 3  | 2  | 1  | 5  | 1  | 1  | 3  | 1 |
| ENSP00000312576,ENSP000                 | ENSG00000204982 | PRSS2      | 15  | 0  | 0  | 0  | 4  | 5  | 5  | 0  | 0  | 0  | 0  | 0  | 0  | 0  | 0  | 0  | 0  | 0  | 0  | 0  | 0  | 0  | 0  | 0  | 0  | 0  | 0  | 0  | 0  | 0  | 1  |   |
| ENSP00000312606,ENSP000                 | ENSG00000117448 | AKR1A1     | 244 | 3  | 6  | 6  | 7  | 9  | 10 | 4  | 7  | 5  | 5  | 2  | 2  | 4  | 6  | 6  | 12 | 13 | 8  | 12 | 10 | 11 | 3  | 4  | 5  | 23 | 15 | 9  | 19 | 9  | 9  |   |
| ENSP00000312606_rs22295;ENSG00000117448 | AKR1A1          | 233        | 3   | 6  | 6  | 7  | 9  | 9  | 3  | 6  | 5  | 5  | 2  | 2  | 4  | 6  | 5  | 5  | 11 | 13 | 7  | 13 | 10 | 10 | 3  | 4  | 5  | 21 | 14 | 9  | 18 | 8  | 9  |   |
| ENSP00000312618                         | ENSG00000176646 | ACAD9      | 233 | 8  | 2  | 4  | 8  | 10 | 8  | 7  | 13 | 7  | 15 | 4  | 10 | 7  | 3  | 12 | 5  | 7  | 9  | 11 | 6  | 13 | 7  | 5  | 7  | 12 | 9  | 6  | 7  | 4  | 7  |   |
| ENSP00000312625,ENSP000                 | ENSG00000127483 | HP1BP3     | 274 | 8  | 7  | 4  | 9  | 11 | 8  | 12 | 10 | 8  | 6  | 9  | 10 | 7  | 8  | 10 | 6  | 12 | 10 | 12 | 10 | 11 | 12 | 8  | 8  | 6  | 16 | 6  | 8  | 13 | 9  |   |
| ENSP00000312664_A398V,r;ENSG00000106144 | CASP2           | 13         | 1   | 1  | 1  | 0  | 0  | 0  | 0  | 0  | 1  | 0  | 0  | 0  | 0  | 0  | 0  | 1  | 0  | 1  | 1  | 1  | 1  | 1  | 0  | 1  | 0  | 0  | 1  | 0  | 0  | 1  | 0  |   |
| ENSP00000312671,ENSP000                 | ENSG00000173442 | EHBP1L1    | 65  | 1  | 3  | 2  | 5  | 1  | 0  | 5  | 1  | 4  | 1  | 0  | 0  | 0  | 1  | 5  | 2  | 4  | 1  | 5  | 3  | 1  | 0  | 4  | 1  | 0  | 3  | 5  | 2  | 2  | 1  | 2 |
| ENSP00000312675,ENSP000                 | ENSG00000177238 | TRIM72     | 47  | 0  | 0  | 1  | 0  | 0  | 0  | 0  | 0  | 0  | 0  | 0  | 0  | 0  | 0  | 0  | 0  | 6  | 11 | 7  | 0  | 0  | 0  | 0  | 0  | 0  | 0  | 0  | 9  | 8  | 5  |   |
| ENSP00000312697,ENSP000                 | ENSG00000178028 | DMAPI1     | 114 | 2  | 5  | 2  | 2  | 4  | 5  | 5  | 4  | 4  | 7  | 3  | 4  | 3  | 0  | 7  | 2  |    |    |    |    |    |    |    |    |    |    |    |    |    |    |   |

|                                                                         |              |      |    |    |    |    |    |    |    |    |    |    |    |    |    |    |    |    |    |    |    |    |    |    |    |    |    |    |    |    |    |    |   |
|-------------------------------------------------------------------------|--------------|------|----|----|----|----|----|----|----|----|----|----|----|----|----|----|----|----|----|----|----|----|----|----|----|----|----|----|----|----|----|----|---|
| ENSP00000314153,ENSP00000314153,ENSP00000314153                         | ZBTB33       | 16   | 0  | 1  | 0  | 3  | 0  | 0  | 1  | 0  | 0  | 0  | 2  | 1  | 1  | 1  | 1  | 0  | 1  | 0  | 2  | 0  | 0  | 0  | 0  | 0  | 0  | 0  | 1  | 1  | 0  |    |   |
| ENSP00000314193,ENSP00000314193,ENSP00000314193                         | WDR75        | 97   | 7  | 0  | 2  | 0  | 1  | 1  | 3  | 0  | 3  | 4  | 0  | 4  | 4  | 1  | 4  | 3  | 6  | 4  | 3  | 3  | 5  | 6  | 2  | 5  | 5  | 3  | 2  | 7  | 5  | 4  |   |
| ENSP00000314311,ENSP00000314311,ENSP00000314311                         | LARF7        | 131  | 1  | 4  | 2  | 4  | 5  | 3  | 9  | 6  | 5  | 6  | 5  | 3  | 5  | 3  | 2  | 3  | 5  | 5  | 2  | 6  | 5  | 5  | 2  | 7  | 5  | 5  | 4  | 5  | 4  |    |   |
| ENSP00000314348,ENSP00000314348,ENSP00000314348                         | DDX10        | 105  | 8  | 5  | 6  | 2  | 0  | 1  | 6  | 2  | 6  | 5  | 5  | 2  | 2  | 3  | 3  | 2  | 6  | 2  | 3  | 5  | 1  | 5  | 2  | 4  | 3  | 2  | 1  | 4  | 6  | 3  |   |
| ENSP00000314349_R437G,ENSP00000314349_R437G,ENSP00000314349_R437G       | TCOF1        | 151  | 5  | 6  | 6  | 2  | 3  | 1  | 5  | 3  | 2  | 7  | 4  | 7  | 2  | 3  | 5  | 1  | 8  | 4  | 5  | 4  | 6  | 14 | 8  | 8  | 1  | 2  | 3  | 9  | 10 | 7  |   |
| ENSP00000314400,ENSP00000314400,ENSP00000314400                         | IAH1         | 18   | 0  | 0  | 0  | 0  | 2  | 2  | 0  | 0  | 1  | 1  | 1  | 0  | 0  | 0  | 0  | 0  | 1  | 0  | 0  | 1  | 1  | 0  | 2  | 0  | 1  | 0  | 1  | 1  | 2  | 1  |   |
| ENSP00000314441,ENSP00000314441,ENSP00000314441                         | METTL1       | 23   | 2  | 0  | 2  | 2  | 0  | 1  | 2  | 0  | 1  | 0  | 0  | 0  | 0  | 1  | 0  | 1  | 1  | 2  | 1  | 1  | 0  | 0  | 0  | 0  | 1  | 2  | 1  | 0  | 1  | 0  |   |
| ENSP00000314491_A408T,ENSP00000314491_A408T,ENSP00000314491_A408T       | SRRT         | 291  | 19 | 7  | 8  | 6  | 7  | 8  | 5  | 10 | 6  | 22 | 11 | 8  | 4  | 8  | 9  | 6  | 8  | 7  | 12 | 11 | 11 | 13 | 10 | 8  | 13 | 7  | 7  | 16 | 12 | 12 |   |
| ENSP00000314499,ENSP00000314499,ENSP00000314499                         | GAK          | 123  | 4  | 5  | 2  | 6  | 6  | 4  | 5  | 3  | 4  | 1  | 0  | 0  | 2  | 4  | 4  | 3  | 5  | 5  | 4  | 6  | 5  | 4  | 3  | 2  | 11 | 5  | 7  | 4  | 4  | 5  |   |
| ENSP00000314508,ENSP00000314508,ENSP00000314508                         | GBA          | 125  | 2  | 3  | 2  | 5  | 6  | 5  | 7  | 2  | 3  | 6  | 5  | 3  | 4  | 5  | 2  | 2  | 2  | 5  | 2  | 6  | 6  | 6  | 7  | 4  | 7  | 4  | 4  | 2  | 5  | 3  |   |
| ENSP00000314544,ENSP00000314544,ENSP00000314544                         | C7orf28B     | 58   | 2  | 3  | 0  | 4  | 2  | 2  | 2  | 1  | 0  | 1  | 2  | 0  | 2  | 2  | 1  | 2  | 2  | 2  | 2  | 1  | 1  | 1  | 2  | 0  | 2  | 4  | 1  | 7  | 3  | 4  |   |
| ENSP00000314556,ENSP00000314556,ENSP00000314556                         | UACA         | 144  | 5  | 2  | 3  | 5  | 8  | 2  | 9  | 3  | 3  | 6  | 1  | 4  | 7  | 3  | 6  | 8  | 5  | 2  | 6  | 7  | 2  | 13 | 8  | 6  | 8  | 7  | 5  | 0  | 0  | 0  |   |
| ENSP00000314566,ENSP00000314566,ENSP00000314566                         | CYTH2        | 16   | 1  | 0  | 0  | 1  | 0  | 0  | 1  | 1  | 1  | 2  | 0  | 0  | 2  | 1  | 0  | 0  | 0  | 0  | 1  | 0  | 1  | 0  | 1  | 0  | 0  | 0  | 1  | 1  | 1  | 1  |   |
| ENSP00000314615,ENSP00000314615,ENSP00000314615                         | ARFGAP1      | 43   | 4  | 4  | 1  | 1  | 3  | 1  | 2  | 1  | 0  | 0  | 1  | 0  | 1  | 2  | 1  | 0  | 1  | 0  | 1  | 2  | 1  | 3  | 1  | 1  | 4  | 2  | 0  | 2  | 2  | 1  |   |
| ENSP00000314622,ENSP00000314622,ENSP00000314622                         | FADH1        | 61   | 2  | 1  | 1  | 2  | 3  | 3  | 3  | 1  | 1  | 3  | 0  | 4  | 2  | 0  | 2  | 1  | 3  | 3  | 1  | 1  | 2  | 4  | 2  | 4  | 2  | 3  | 1  | 2  | 2  | 2  |   |
| ENSP00000314625,ENSP00000314625,ENSP00000314625                         | LEPROTL1     | 23   | 1  | 0  | 1  | 1  | 0  | 1  | 1  | 0  | 1  | 1  | 0  | 1  | 0  | 0  | 0  | 1  | 0  | 1  | 1  | 1  | 1  | 1  | 0  | 2  | 4  | 0  | 1  | 1  | 0  | 1  |   |
| ENSP00000314649,ENSP00000314649,ENSP00000314649                         | ALDH5A1      | 107  | 3  | 4  | 5  | 4  | 3  | 2  | 5  | 7  | 3  | 3  | 3  | 1  | 3  | 3  | 2  | 4  | 2  | 5  | 6  | 4  | 5  | 8  | 5  | 3  | 3  | 3  | 2  | 1  | 4  | 1  |   |
| ENSP00000314664,ENSP00000314664,ENSP00000314664                         | CD46         | 32   | 2  | 1  | 0  | 2  | 1  | 1  | 3  | 0  | 0  | 3  | 0  | 2  | 0  | 0  | 4  | 0  | 2  | 0  | 2  | 1  | 1  | 4  | 0  | 1  | 1  | 1  | 0  | 0  | 0  | 0  |   |
| ENSP00000314724_rs21948,ENSP00000314724_rs21948,ENSP00000314724_rs21948 | PPFIBP1      | 309  | 15 | 6  | 9  | 3  | 4  | 6  | 4  | 4  | 9  | 37 | 22 | 24 | 9  | 6  | 11 | 6  | 13 | 9  | 11 | 11 | 12 | 20 | 11 | 10 | 6  | 5  | 4  | 7  | 6  | 9  |   |
| ENSP00000314768,ENSP00000314768,ENSP00000314768                         | LSM14A       | 159  | 8  | 7  | 6  | 7  | 3  | 4  | 5  | 2  | 6  | 8  | 5  | 3  | 3  | 3  | 6  | 4  | 7  | 5  | 6  | 6  | 7  | 9  | 2  | 3  | 5  | 5  | 3  | 7  | 8  | 6  |   |
| ENSP00000314787,ENSP00000314787,ENSP00000314787                         | ARHGEF2      | 145  | 3  | 2  | 0  | 5  | 3  | 5  | 5  | 6  | 4  | 6  | 0  | 4  | 2  | 1  | 4  | 7  | 5  | 5  | 3  | 7  | 5  | 6  | 5  | 4  | 5  | 1  | 3  | 19 | 9  | 11 |   |
| ENSP00000314837,ENSP00000314837,ENSP00000314837                         | KLC2         | 138  | 8  | 7  | 1  | 2  | 1  | 2  | 3  | 3  | 2  | 0  | 1  | 1  | 1  | 3  | 2  | 3  | 9  | 5  | 8  | 8  | 6  | 7  | 4  | 4  | 4  | 5  | 6  | 11 | 9  | 12 |   |
| ENSP00000314949,ENSP00000314949,ENSP00000314949                         | POLR2A       | 258  | 5  | 4  | 3  | 8  | 7  | 9  | 10 | 5  | 4  | 12 | 7  | 7  | 11 | 8  | 12 | 12 | 10 | 7  | 12 | 10 | 10 | 15 | 9  | 10 | 13 | 10 | 7  | 8  | 5  | 8  |   |
| ENSP00000314973,ENSP00000314973,ENSP00000314973                         | PCPASP1      | 22   | 1  | 0  | 1  | 0  | 0  | 2  | 0  | 0  | 1  | 1  | 0  | 0  | 0  | 0  | 1  | 0  | 1  | 0  | 0  | 1  | 0  | 1  | 0  | 1  | 0  | 2  | 0  | 1  | 4  | 0  | 1 |
| ENSP00000315008,ENSP00000315008,ENSP00000315008                         | PRM1         | 206  | 9  | 4  | 4  | 7  | 5  | 5  | 2  | 1  | 2  | 6  | 6  | 9  | 7  | 8  | 10 | 3  | 6  | 6  | 16 | 11 | 15 | 11 | 1  | 4  | 7  | 11 | 4  | 9  | 8  | 9  |   |
| ENSP00000315013,ENSP00000315013,ENSP00000315013                         | CRAT         | 96   | 1  | 1  | 1  | 1  | 1  | 1  | 7  | 2  | 4  | 3  | 0  | 2  | 4  | 2  | 2  | 0  | 1  | 0  | 8  | 7  | 7  | 4  | 2  | 1  | 3  | 3  | 4  | 9  | 7  | 8  |   |
| ENSP00000315017,ENSP00000315017,ENSP00000315017                         | MRPL1        | 65   | 2  | 2  | 0  | 1  | 2  | 1  | 5  | 4  | 1  | 7  | 0  | 0  | 1  | 2  | 2  | 5  | 4  | 4  | 1  | 1  | 2  | 3  | 1  | 3  | 2  | 2  | 1  | 3  | 1  | 2  |   |
| ENSP00000315112,ENSP00000315112,ENSP00000315112                         | RNF31        | 34   | 1  | 2  | 1  | 2  | 1  | 1  | 2  | 0  | 1  | 0  | 0  | 2  | 2  | 1  | 1  | 4  | 3  | 1  | 2  | 2  | 0  | 0  | 2  | 0  | 0  | 1  | 1  | 0  | 1  | 1  |   |
| ENSP00000315118,ENSP00000315118,ENSP00000315118                         | ADC4K        | 27   | 0  | 1  | 0  | 2  | 1  | 1  | 2  | 1  | 0  | 3  | 2  | 6  | 0  | 0  | 0  | 0  | 0  | 0  | 1  | 0  | 0  | 1  | 0  | 0  | 0  | 0  | 2  | 1  | 0  | 3  |   |
| ENSP00000315147,ENSP00000315147,ENSP00000315147                         | ISYNA1       | 20   | 1  | 0  | 0  | 0  | 0  | 0  | 0  | 0  | 0  | 0  | 0  | 0  | 0  | 0  | 9  | 1  | 6  | 1  | 0  | 1  | 0  | 1  | 0  | 0  | 0  | 1  | 0  | 0  | 0  | 0  |   |
| ENSP00000315190,ENSP00000315190,ENSP00000315190                         | ITGA3        | 109  | 1  | 1  | 0  | 3  | 3  | 4  | 6  | 2  | 3  | 6  | 1  | 6  | 6  | 3  | 4  | 10 | 15 | 8  | 7  | 4  | 4  | 2  | 2  | 2  | 1  | 4  | 1  | 0  | 0  | 0  |   |
| ENSP00000315205,ENSP00000315205,ENSP00000315205                         | ILF3         | 1040 | 32 | 25 | 28 | 25 | 36 | 23 | 27 | 35 | 49 | 30 | 32 | 31 | 31 | 38 | 30 | 39 | 31 | 40 | 52 | 44 | 51 | 33 | 29 | 45 | 35 | 34 | 46 | 31 | 31 | 31 |   |
| ENSP00000315208,ENSP00000315208,ENSP00000315208                         | DHDH2        | 21   | 1  | 1  | 1  | 1  | 1  | 0  | 1  | 0  | 0  | 0  | 0  | 0  | 3  | 0  | 1  | 2  | 1  | 1  | 2  | 0  | 1  | 1  | 0  | 0  | 0  | 1  | 1  | 0  | 0  | 0  |   |
| ENSP00000315224_M962T,ENSP00000315224_M962T,ENSP00000315224_M962T       | HERC2P3,HERI | 26   | 1  | 0  | 0  | 2  | 0  | 1  | 3  | 0  | 1  | 0  | 0  | 0  | 2  | 1  | 0  | 0  | 2  | 0  | 2  | 1  | 1  | 2  | 1  | 0  | 1  | 0  | 1  | 0  | 2  | 2  | 0 |
| ENSP00000315299,ENSP00000315299,ENSP00000315299                         | CALML3       | 67   | 4  | 2  | 3  | 7  | 13 | 8  | 3  | 0  | 2  | 1  | 1  | 1  | 1  | 0  | 2  | 0  | 2  | 1  | 1  | 2  | 2  | 0  | 1  | 0  | 2  | 3  | 0  | 2  | 0  | 3  |   |
| ENSP00000315351,ENSP00000315351,ENSP00000315351                         | D2HGDH       | 50   | 1  | 3  | 1  | 4  | 3  | 3  | 4  | 1  | 0  | 0  | 1  | 2  | 1  | 1  | 0  | 2  | 2  | 2  | 3  | 4  | 3  | 0  | 2  | 0  | 0  | 3  | 2  | 1  | 0  | 1  |   |
| ENSP00000315357,ENSP00000315357,ENSP00000315357                         | ARLGP6       | 16   | 1  | 2  | 0  | 1  | 0  | 1  | 1  | 0  | 0  | 0  | 0  | 1  | 1  | 1  | 1  | 0  | 0  | 0  | 0  | 1  | 1  | 2  | 0  | 0  | 1  | 0  | 0  | 0  | 0  | 0  |   |
| ENSP00000315379,ENSP00000315379,ENSP00000315379                         | PRPF3        | 219  | 5  | 15 | 4  | 7  | 7  | 6  | 9  | 6  | 5  | 6  | 13 | 7  | 4  | 8  | 6  | 3  | 9  | 5  | 6  | 11 | 7  | 8  | 15 | 7  | 7  | 7  | 2  | 7  | 12 | 5  |   |
| ENSP00000315386,ENSP00000315386,ENSP00000315386                         | KDEL2C       | 35   | 5  | 1  | 7  | 0  | 0  | 0  | 1  | 1  | 1  | 2  | 0  | 0  | 0  | 1  | 2  | 1  | 0  | 1  | 1  | 1  | 1  | 5  | 0  | 0  | 1  | 0  | 2  | 0  | 0  | 1  |   |
| ENSP00000315387,ENSP00000315387,ENSP00000315387                         | TMEML102     | 17   | 0  | 0  | 0  | 1  | 0  | 0  | 1  | 1  | 0  | 0  | 0  | 1  | 0  | 0  | 0  | 1  | 0  | 1  | 0  | 1  | 1  | 0  | 1  | 0  | 3  | 1  | 0  | 3  | 0  | 0  |   |
| ENSP00000315397,ENSP00000315397,ENSP00000315397                         | MRP531       | 110  | 6  | 2  | 5  | 3  | 4  | 3  | 2  | 2  | 5  | 6  | 3  | 3  | 4  | 3  | 2  | 4  | 6  | 2  | 3  | 3  | 2  | 4  | 2  | 5  | 6  | 5  | 3  | 8  | 3  | 1  |   |
| ENSP00000315397_rs13508,ENSP00000315397_rs13508,ENSP00000315397_rs13508 | MRP33        | 95   | 4  | 2  | 3  | 3  | 5  | 3  | 2  | 2  | 5  | 4  | 3  | 3  | 4  | 3  | 2  | 4  | 4  | 1  | 3  | 3  | 2  | 4  | 2  | 5  | 3  | 4  | 3  | 5  | 3  | 1  |   |
| ENSP00000315410,ENSP00000315410,ENSP00000315410                         | OSPL3        | 64   | 0  | 3  | 1  | 4  | 0  | 3  | 2  | 0  | 2  | 9  | 4  | 4  | 0  | 2  | 0  | 3  | 2  | 4  | 0  | 1  | 0  | 6  | 3  | 3  | 2  | 1  | 2  | 0  | 3  | 3  | 0 |
| ENSP00000315434_rs74358,ENSP00000315434_rs74358,ENSP00000315434_rs74358 | PML          | 131  | 2  | 3  | 1  | 5  | 10 | 8  | 5  | 7  | 4  | 6  | 3  | 2  | 2  | 2  | 0  | 2  | 3  | 2  | 3  | 2  | 2  | 13 | 11 | 9  | 7  | 7  | 2  | 3  | 3  | 2  |   |
| ENSP00000315476,ENSP00000315476,ENSP00000315476                         | EXOSC4       | 10   | 1  | 0  | 0  | 0  | 0  | 0  | 0  | 0  | 0  | 0  | 0  | 0  | 0  | 0  | 1  | 0  | 1  | 1  | 1  | 0  | 0  | 0  | 0  | 0  | 1  | 0  | 0  | 3  | 1  | 0  |   |
| ENSP00000315558,ENSP00000315558,ENSP00000315558                         | DUS3L        | 23   | 0  | 1  | 0  | 1  | 1  | 0  | 0  | 0  | 0  | 2  | 0  | 0  | 0  | 0  | 0  | 1  | 1  | 1  | 1  | 0  | 1  | 1  | 1  | 1  | 1  | 1  | 0  | 1  | 2  | 3  |   |
| ENSP00000315568,ENSP00000315568,ENSP00000315568                         | AVL9         | 24   | 0  | 0  | 1  | 1  | 0  | 0  | 2  | 1  | 1  | 0  | 1  | 0  | 0  | 0  | 1  | 1  | 1  | 2  | 2  | 0  | 1  | 0  | 1  | 1  | 3  | 2  | 0  | 1  | 1  | 0  | 0 |
| ENSP00000315569,ENSP00000315569,ENSP00000315569                         | FAM6A,DIS3L2 | 50   | 0  | 2  | 0  | 4  | 1  | 0  | 1  | 0  | 0  | 0  | 0  | 0  | 0  | 4  | 1  | 0  | 5  | 2  | 2  | 2  | 7  | 1  | 0  | 0  | 9  | 4  | 3  | 1  | 0  | 1  |   |
| ENSP00000315614,ENSP00000315614,ENSP00000315614                         | C8orf47      | 12   | 0  | 0  | 0  | 0  | 0  | 0  | 0  | 0  | 0  | 0  | 0  | 0  | 0  | 0  | 0  | 0  | 1  | 1  | 2  | 3  | 0  | 0  | 0  | 0  | 0  | 0  | 0  | 4  | 0  | 1  |   |
| ENSP00000315630_rs41589,ENSP00000315630_rs41589,ENSP000003              |              |      |    |    |    |    |    |    |    |    |    |    |    |    |    |    |    |    |    |    |    |    |    |    |    |    |    |    |    |    |    |    |   |

|                                  |                   |             |      |    |    |    |    |    |    |    |    |    |    |    |    |    |    |    |    |    |    |    |    |    |    |    |    |    |    |    |    |    |    |    |   |
|----------------------------------|-------------------|-------------|------|----|----|----|----|----|----|----|----|----|----|----|----|----|----|----|----|----|----|----|----|----|----|----|----|----|----|----|----|----|----|----|---|
| ENSPO0000317224,ENSPO000         | ENSOG00000179134  | SAMD4B      | 10   | 0  | 0  | 2  | 0  | 0  | 0  | 1  | 0  | 0  | 0  | 0  | 0  | 0  | 0  | 1  | 0  | 1  | 1  | 1  | 1  | 0  | 1  | 0  | 1  | 0  | 0  | 0  | 0  | 0  | 0  |    |   |
| ENSPO0000317232,ENSPO000         | ENSOG00000141756  | FKBP10      | 131  | 18 | 11 | 8  | 0  | 0  | 1  | 1  | 2  | 0  | 4  | 10 | 6  | 1  | 0  | 0  | 5  | 10 | 7  | 2  | 2  | 1  | 0  | 0  | 0  | 2  | 1  | 12 | 15 | 12 |    |    |   |
| ENSPO0000317257,ENSPO000         | ENSOG00000214078  | RBM12,CPNE1 | 127  | 11 | 6  | 6  | 2  | 6  | 2  | 7  | 3  | 7  | 3  | 1  | 2  | 3  | 2  | 2  | 5  | 5  | 3  | 3  | 3  | 4  | 3  | 3  | 5  | 8  | 6  | 3  | 5  | 5  |    |    |   |
| ENSPO0000317271,ENSPO000         | ENSOG00000180398  | MCFD2       | 51   | 2  | 1  | 1  | 3  | 0  | 1  | 7  | 1  | 2  | 2  | 0  | 1  | 5  | 1  | 3  | 3  | 2  | 3  | 5  | 2  | 1  | 0  | 0  | 0  | 1  | 3  | 1  | 0  | 0  | 0  |    |   |
| ENSPO0000317272,ENSPO000         | ENSOG00000105976  | MCTD        | 35   | 1  | 0  | 0  | 0  | 0  | 0  | 4  | 1  | 6  | 0  | 0  | 0  | 2  | 0  | 1  | 1  | 3  | 1  | 0  | 0  | 0  | 4  | 1  | 3  | 1  | 2  | 2  | 2  | 0  | 0  |    |   |
| ENSPO0000317300,ENSPO000         | ENSOG00000176454  | SPR4        | 29   | 0  | 0  | 1  | 2  | 2  | 1  | 4  | 2  | 2  | 0  | 0  | 2  | 0  | 0  | 0  | 1  | 4  | 1  | 0  | 0  | 0  | 1  | 1  | 0  | 0  | 1  | 1  | 2  | 0  | 1  |    |   |
| ENSPO0000317331,ENSPO000         | ENSOG00000180879  | LSRAT       | 149  | 7  | 3  | 6  | 2  | 8  | 5  | 4  | 5  | 9  | 2  | 5  | 3  | 3  | 5  | 5  | 6  | 4  | 6  | 3  | 5  | 5  | 3  | 5  | 8  | 6  | 5  | 8  | 3  | 5  |    |    |   |
| ENSPO0000317332,ENSPO000         | ENSOG00000178996  | SNX18       | 18   | 1  | 2  | 2  | 1  | 0  | 0  | 2  | 0  | 1  | 0  | 0  | 0  | 1  | 0  | 0  | 2  | 2  | 1  | 3  | 0  | 0  | 0  | 0  | 0  | 0  | 0  | 0  | 0  | 0  | 0  |    |   |
| ENSPO0000317334                  | ENSOG00000120438  | TCP1        | 912  | 43 | 13 | 36 | 19 | 21 | 25 | 23 | 11 | 29 | 46 | 8  | 16 | 29 | 10 | 31 | 40 | 38 | 48 | 29 | 26 | 46 | 38 | 12 | 27 | 47 | 31 | 34 | 60 | 32 | 44 |    |   |
| ENSPO0000317362,ENSPO000         | ENSOG00000137509  | PRCP        | 19   | 1  | 0  | 2  | 0  | 0  | 0  | 0  | 0  | 0  | 0  | 1  | 0  | 1  | 1  | 0  | 1  | 2  | 0  | 1  | 1  | 2  | 0  | 0  | 1  | 1  | 0  | 0  | 2  | 0  | 1  |    |   |
| ENSPO0000317379,ENSPO000         | ENSOG00000115419  | GLS         | 143  | 9  | 3  | 4  | 2  | 1  | 3  | 0  | 1  | 2  | 13 | 3  | 4  | 3  | 2  | 11 | 1  | 0  | 2  | 5  | 5  | 4  | 8  | 5  | 7  | 9  | 6  | 6  | 8  | 9  | 7  |    |   |
| ENSPO0000317399_E236D            | ENSOG00000104529  | EEF1D       | 304  | 20 | 9  | 10 | 3  | 8  | 8  | 9  | 3  | 10 | 14 | 4  | 7  | 7  | 8  | 9  | 11 | 11 | 10 | 8  | 15 | 8  | 14 | 7  | 8  | 18 | 8  | 13 | 18 | 13 | 13 |    |   |
| ENSPO0000317468                  | ENSOG00000176108  | CHMP6       | 57   | 2  | 1  | 2  | 2  | 2  | 2  | 2  | 3  | 1  | 1  | 0  | 1  | 2  | 2  | 2  | 4  | 2  | 1  | 2  | 2  | 2  | 5  | 3  | 1  | 3  | 1  | 1  | 2  | 1  | 2  |    |   |
| ENSPO0000317473                  | ENSOG00000137955  | RABGGTB     | 50   | 2  | 2  | 0  | 2  | 2  | 1  | 2  | 1  | 0  | 0  | 0  | 0  | 2  | 2  | 1  | 3  | 2  | 3  | 3  | 3  | 1  | 3  | 0  | 0  | 4  | 2  | 1  | 2  | 2  | 3  |    |   |
| ENSPO0000317487,ENSPO000         | ENSOG00000166037  | CEP57       | 33   | 2  | 1  | 2  | 0  | 0  | 1  | 1  | 1  | 3  | 3  | 0  | 2  | 0  | 0  | 3  | 0  | 2  | 1  | 1  | 1  | 1  | 3  | 0  | 1  | 2  | 1  | 1  | 0  | 0  | 0  |    |   |
| ENSPO0000317578                  | ENSOG00000100077  | ADBRK2      | 28   | 0  | 1  | 0  | 3  | 1  | 1  | 1  | 1  | 0  | 0  | 1  | 0  | 0  | 2  | 1  | 0  | 1  | 2  | 1  | 1  | 0  | 0  | 1  | 1  | 0  | 2  | 3  | 2  | 1  | 2  | 0  |   |
| ENSPO0000317579                  | ENSOG00000140688  | C16orf58    | 16   | 2  | 0  | 0  | 1  | 1  | 1  | 1  | 1  | 1  | 0  | 0  | 1  | 0  | 0  | 0  | 0  | 1  | 1  | 0  | 1  | 0  | 1  | 0  | 0  | 1  | 1  | 1  | 1  | 0  | 0  | 0  |   |
| ENSPO0000317597,ENSPO000         | ENSOG00000159023  | EPBA1       | 73   | 1  | 2  | 1  | 2  | 3  | 5  | 2  | 2  | 0  | 3  | 2  | 1  | 1  | 1  | 1  | 1  | 4  | 2  | 2  | 1  | 2  | 4  | 1  | 6  | 6  | 4  | 3  | 3  | 3  | 4  |    |   |
| ENSPO0000317618                  | ENSOG00000136480  | POLG2       | 15   | 1  | 0  | 1  | 0  | 0  | 0  | 0  | 0  | 0  | 1  | 2  | 0  | 1  | 0  | 0  | 0  | 1  | 1  | 1  | 0  | 0  | 0  | 0  | 1  | 1  | 0  | 1  | 1  | 0  | 0  | 2  |   |
| ENSPO0000317636,ENSPO000         | ENSOG00000108469  | RECQL5      | 12   | 0  | 0  | 1  | 1  | 0  | 2  | 0  | 0  | 0  | 0  | 1  | 0  | 0  | 0  | 0  | 0  | 0  | 1  | 0  | 0  | 0  | 0  | 0  | 1  | 1  | 0  | 0  | 0  | 2  | 0  | 2  |   |
| ENSPO0000317659,ENSPO000         | ENSOG00000143774  | GUK1        | 48   | 0  | 0  | 0  | 2  | 3  | 3  | 3  | 2  | 2  | 1  | 0  | 2  | 1  | 0  | 2  | 1  | 2  | 1  | 2  | 1  | 1  | 1  | 2  | 2  | 0  | 4  | 4  | 3  | 1  | 1  | 2  |   |
| ENSPO0000317681,ENSPO000         | ENSOG00000197312  | DDI2        | 146  | 7  | 5  | 5  | 6  | 8  | 7  | 4  | 5  | 5  | 2  | 5  | 2  | 2  | 4  | 2  | 4  | 6  | 4  | 3  | 7  | 4  | 2  | 6  | 6  | 8  | 8  | 4  | 5  | 7  | 3  |    |   |
| ENSPO0000317714,ENSPO000         | ENSOG00000103496  | STX4        | 63   | 2  | 1  | 2  | 2  | 1  | 1  | 2  | 1  | 1  | 3  | 3  | 2  | 3  | 2  | 2  | 0  | 1  | 0  | 3  | 4  | 4  | 3  | 3  | 2  | 3  | 4  | 2  | 2  | 2  | 2  |    |   |
| ENSPO0000317780                  | ENSOG00000178741  | COX5A       | 219  | 11 | 11 | 5  | 5  | 6  | 6  | 9  | 5  | 5  | 12 | 6  | 7  | 9  | 6  | 4  | 10 | 4  | 5  | 7  | 4  | 13 | 14 | 9  | 7  | 12 | 5  | 5  | 9  | 3  | 3  |    |   |
| ENSPO0000317786,ENSPO000         | ENSOG00000133030  | MPRIP       | 84   | 0  | 2  | 2  | 0  | 0  | 0  | 1  | 3  | 0  | 3  | 4  | 3  | 5  | 8  | 3  | 3  | 1  | 2  | 0  | 4  | 1  | 3  | 12 | 6  | 10 | 2  | 2  | 1  | 2  | 0  | 1  |   |
| ENSPO0000317891,ENSPO000         | ENSOG00000145901  | TNIP1       | 14   | 0  | 2  | 0  | 0  | 0  | 0  | 0  | 0  | 0  | 0  | 0  | 0  | 0  | 0  | 1  | 0  | 0  | 1  | 0  | 1  | 1  | 0  | 0  | 0  | 0  | 3  | 0  | 2  | 1  | 1  |    |   |
| ENSPO0000317912                  | ENSOG00000178078  | STAP2       | 11   | 1  | 0  | 0  | 0  | 0  | 0  | 0  | 0  | 1  | 0  | 0  | 0  | 0  | 0  | 0  | 0  | 0  | 0  | 2  | 4  | 1  | 0  | 0  | 0  | 0  | 2  | 0  | 0  | 0  | 0  | 0  |   |
| ENSPO0000317955,ENSPO000         | ENSOG00000102189  | EEA1        | 642  | 38 | 33 | 25 | 1  | 3  | 3  | 22 | 14 | 15 | 25 | 11 | 13 | 33 | 23 | 28 | 12 | 18 | 10 | 28 | 30 | 24 | 39 | 27 | 29 | 22 | 24 | 13 | 30 | 26 | 23 |    |   |
| ENSPO0000317971,ENSPO000         | ENSOG00000104784  | WDTCT1      | 11   | 0  | 0  | 0  | 2  | 0  | 0  | 0  | 0  | 0  | 0  | 0  | 0  | 1  | 0  | 0  | 0  | 0  | 1  | 1  | 2  | 0  | 0  | 0  | 0  | 2  | 1  | 0  | 0  | 0  | 0  | 0  |   |
| ENSPO0000317992_rs37485,ENSPO000 | ENSOG00000188976  | NOCL2       | 105  | 3  | 2  | 3  | 2  | 2  | 1  | 4  | 2  | 1  | 5  | 2  | 3  | 2  | 6  | 7  | 3  | 4  | 5  | 4  | 2  | 6  | 4  | 2  | 6  | 2  | 3  | 3  | 6  | 4  | 6  |    |   |
| ENSPO0000318016,ENSPO000         | ENSOG00000164961  | KIAA0196    | 91   | 2  | 3  | 1  | 3  | 6  | 7  | 6  | 3  | 1  | 2  | 1  | 2  | 4  | 2  | 2  | 4  | 2  | 3  | 3  | 4  | 3  | 3  | 1  | 2  | 5  | 4  | 4  | 4  | 3  | 1  |    |   |
| ENSPO0000318024,ENSPO000         | ENSOG00000176623  | FAM82B      | 95   | 1  | 1  | 5  | 0  | 1  | 3  | 1  | 1  | 3  | 8  | 1  | 2  | 2  | 3  | 4  | 8  | 9  | 4  | 2  | 1  | 2  | 4  | 4  | 4  | 4  | 3  | 2  | 7  | 1  | 4  |    |   |
| ENSPO0000318066,ENSPO000         | ENSOG000000001561 | ENP4        | 51   | 0  | 0  | 0  | 1  | 2  | 1  | 3  | 1  | 0  | 0  | 0  | 2  | 3  | 0  | 2  | 2  | 4  | 1  | 3  | 3  | 4  | 1  | 1  | 1  | 2  | 5  | 2  | 3  | 3  | 1  |    |   |
| ENSPO0000318086,ENSPO000         | ENSOG00000129680  | MAP7D3      | 13   | 3  | 0  | 0  | 0  | 0  | 0  | 0  | 0  | 1  | 0  | 0  | 0  | 0  | 0  | 0  | 2  | 0  | 1  | 0  | 0  | 0  | 0  | 1  | 0  | 0  | 1  | 0  | 1  | 1  | 2  | 0  |   |
| ENSPO0000318089                  | ENSOG00000145012  | LPP         | 42   | 1  | 1  | 1  | 3  | 4  | 3  | 2  | 0  | 0  | 1  | 0  | 0  | 1  | 0  | 1  | 0  | 1  | 2  | 4  | 0  | 2  | 2  | 1  | 0  | 5  | 3  | 2  | 1  | 1  | 0  | 0  |   |
| ENSPO0000318115,ENSPO000         | ENSOG00000105197  | TIMM50      | 188  | 9  | 2  | 9  | 5  | 2  | 7  | 5  | 5  | 10 | 9  | 3  | 9  | 4  | 2  | 6  | 6  | 3  | 6  | 4  | 6  | 8  | 10 | 2  | 8  | 5  | 8  | 8  | 11 | 6  | 10 |    |   |
| ENSPO0000318128                  | ENSOG00000186222  | CNO         | 25   | 1  | 0  | 1  | 3  | 1  | 1  | 1  | 0  | 1  | 0  | 1  | 1  | 1  | 1  | 0  | 2  | 0  | 0  | 1  | 1  | 0  | 0  | 0  | 0  | 1  | 2  | 2  | 2  | 0  | 1  |    |   |
| ENSPO0000318136,ENSPO000         | ENSOG00000109083  | IFT20       | 11   | 1  | 0  | 1  | 0  | 0  | 0  | 0  | 0  | 1  | 2  | 0  | 0  | 0  | 0  | 0  | 0  | 1  | 0  | 0  | 1  | 0  | 0  | 0  | 1  | 0  | 0  | 1  | 1  | 0  | 1  | 0  |   |
| ENSPO0000318147,ENSPO000         | ENSOG00000116406  | EDM3        | 31   | 1  | 2  | 1  | 3  | 2  | 1  | 2  | 3  | 0  | 0  | 0  | 0  | 0  | 1  | 3  | 3  | 0  | 0  | 3  | 2  | 1  | 0  | 0  | 0  | 1  | 0  | 1  | 0  | 0  | 0  | 0  |   |
| ENSPO0000318165,ENSPO000         | ENSOG00000135506  | OS9         | 51   | 5  | 2  | 4  | 1  | 3  | 4  | 1  | 0  | 1  | 5  | 0  | 2  | 1  | 0  | 1  | 3  | 0  | 2  | 2  | 0  | 0  | 2  | 1  | 4  | 2  | 1  | 2  | 1  | 0  | 1  | 0  |   |
| ENSPO0000318176                  | ENSOG00000180228  | PKRKA       | 71   | 5  | 2  | 3  | 1  | 0  | 0  | 3  | 1  | 0  | 2  | 1  | 3  | 3  | 5  | 4  | 4  | 2  | 2  | 3  | 3  | 5  | 4  | 1  | 2  | 2  | 1  | 2  | 2  | 2  | 3  | 0  |   |
| ENSPO0000318177                  | ENSOG00000107164  | FUBP3       | 210  | 7  | 8  | 5  | 6  | 9  | 5  | 9  | 3  | 4  | 10 | 4  | 7  | 5  | 10 | 5  | 8  | 9  | 4  | 7  | 10 | 4  | 11 | 8  | 7  | 6  | 4  | 4  | 10 | 10 | 11 | 11 |   |
| ENSPO0000318185,ENSPO000         | ENSOG00000116822  | LRCH42      | 20   | 1  | 1  | 0  | 0  | 0  | 1  | 1  | 1  | 0  | 0  | 1  | 0  | 0  | 0  | 2  | 2  | 0  | 1  | 2  | 1  | 2  | 1  | 0  | 0  | 0  | 2  | 0  | 0  | 0  | 0  | 1  |   |
| ENSPO0000318192,ENSPO000         | ENSOG00000178802  | MPI         | 52   | 0  | 1  | 0  | 3  | 3  | 4  | 2  | 0  | 2  | 1  | 1  | 0  | 0  | 2  | 2  | 1  | 1  | 2  | 3  | 4  | 3  | 1  | 1  | 0  | 5  | 3  | 4  | 2  | 0  | 1  | 0  |   |
| ENSPO0000318195,ENSPO000         | ENSOG00000115053  | NCL         | 1769 | 61 | 50 | 37 | 35 | 55 | 42 | 43 | 65 | 42 | 82 | 52 | 44 | 34 | 94 | 46 | 41 | 72 | 62 | 49 | 88 | 53 | 83 | 85 | 47 | 68 | 65 | 45 | 90 | 84 | 55 |    |   |
| ENSPO0000318196                  | ENSOG00000181938  | GINS        | 25   | 1  | 2  | 1  | 2  | 1  | 0  | 1  | 0  | 0  | 1  | 1  | 0  | 0  | 5  | 0  | 0  | 0  | 1  | 1  | 2  | 1  | 0  | 0  | 0  | 1  | 1  | 0  | 0  | 0  | 2  | 1  | 0 |
| ENSPO0000318203,ENSPO000         | ENSOG00000176244  | ACBD7       | 17   | 1  | 1  | 0  | 1  | 2  | 1  | 0  | 1  | 0  | 0  | 1  | 1  | 0  | 0  | 0  | 0  | 0  | 0  | 1  | 1  | 0  | 0  | 0  | 0  | 1  | 1  | 1  | 1  | 1  | 1  | 0  |   |
| ENSPO0000318227,ENSPO000         | ENSOG00000132716  | WDR42A      | 12   | 1  | 1  | 0  | 1  | 1  | 1  | 0  | 0  | 0  | 0  | 0  | 0  | 0  | 0  | 0  | 0  | 1  | 2  | 0  | 0  | 0  | 2  | 0  | 0  | 1  | 0  | 0  | 0  | 1  | 0  | 0  |   |
| ENSPO0000318259,ENSPO000         | ENSOG000000085978 | ATG16L1     | 47   | 3  | 0  | 0  | 0  | 3  | 1  | 1  | 2  | 1  | 3  | 1  | 1  | 1  | 1  | 1  | 1  | 2  | 1  | 3  | 1  | 0  | 4  | 2  | 2  | 0  | 4  | 4  | 3  | 0  | 1  | 0  |   |
| ENSPO0000318262,ENSPO000         | ENSOG00000121749  | TBC1D15     | 117  | 2  | 1  | 1  | 7  | 4  | 4  | 4  | 3  | 1  | 2  | 1  | 1  | 3  | 3  | 4  | 5  | 6  | 6  | 7  | 5  | 6  | 3  | 1  | 2  | 7  | 5  | 6  | 7  | 5  | 5  | 0  |   |
| ENSPO0000318297                  | ENSOG00000175792  | RUVBL1      | 690  | 24 | 13 | 17 | 17 | 23 | 24 | 28 |    |    |    |    |    |    |    |    |    |    |    |    |    |    |    |    |    |    |    |    |    |    |    |    |   |

|                           |                  |         |      |    |    |    |    |    |    |    |    |    |    |    |    |    |    |    |    |    |    |    |    |    |    |    |    |    |    |    |    |    |    |   |
|---------------------------|------------------|---------|------|----|----|----|----|----|----|----|----|----|----|----|----|----|----|----|----|----|----|----|----|----|----|----|----|----|----|----|----|----|----|---|
| ENSP00000319690, R135W.F  | ENSG000000092199 | HNRNPC  | 1162 | 33 | 31 | 26 | 26 | 42 | 31 | 29 | 35 | 24 | 47 | 33 | 37 | 27 | 36 | 32 | 33 | 49 | 42 | 46 | 54 | 35 | 62 | 56 | 40 | 52 | 46 | 27 | 50 | 46 | 35 |   |
| ENSP00000319739, ENSP000  | ENSG00000117906  | RCN2    | 172  | 8  | 4  | 7  | 3  | 2  | 4  | 5  | 1  | 7  | 9  | 5  | 4  | 3  | 0  | 5  | 8  | 9  | 9  | 8  | 11 | 5  | 6  | 4  | 8  | 6  | 4  | 7  | 8  | 6  | 6  |   |
| ENSP00000319742, ENSP000  | ENSG00000114439  | BBX     | 14   | 0  | 0  | 0  | 2  | 1  | 0  | 0  | 0  | 0  | 0  | 0  | 0  | 0  | 1  | 0  | 0  | 0  | 1  | 2  | 2  | 0  | 1  | 0  | 0  | 0  | 1  | 1  | 1  | 1  |    |   |
| ENSP00000319771, ENSP000  | ENSG00000134987  | WDR36   | 237  | 6  | 6  | 6  | 4  | 3  | 5  | 7  | 6  | 7  | 9  | 4  | 6  | 6  | 5  | 8  | 9  | 15 | 10 | 12 | 8  | 7  | 14 | 8  | 11 | 10 | 7  | 6  | 11 | 8  | 13 |   |
| ENSP00000319778, ENSP000  | ENSG00000215725  |         | 15   | 1  | 0  | 0  | 0  | 0  | 1  | 1  | 0  | 0  | 1  | 0  | 1  | 0  | 1  | 0  | 1  | 1  | 0  | 1  | 0  | 1  | 1  | 1  | 1  | 0  | 0  | 1  | 1  | 0  | 1  |   |
| ENSP00000319781, ENSP000  | ENSG00000185051  |         | 24   | 1  | 1  | 0  | 1  | 2  | 1  | 0  | 1  | 2  | 1  | 0  | 0  | 2  | 1  | 1  | 1  | 3  | 1  | 1  | 2  | 0  | 0  | 0  | 0  | 0  | 0  | 1  | 1  | 0  | 0  |   |
| ENSP00000319788, ENSP000  | ENSG00000181019  | NQO1    | 74   | 0  | 0  | 0  | 1  | 6  | 9  | 4  | 1  | 2  | 1  | 0  | 0  | 0  | 0  | 1  | 2  | 3  | 2  | 4  | 5  | 6  | 0  | 1  | 0  | 7  | 10 | 6  | 1  | 2  | 0  |   |
| ENSP00000319814, rs70755: | ENSG00000124253  | PKC1    | 21   | 0  | 0  | 0  | 0  | 11 | 7  | 3  | 0  | 0  | 0  | 0  | 0  | 0  | 0  | 0  | 0  | 0  | 0  | 0  | 0  | 0  | 0  | 0  | 0  | 0  | 0  | 0  | 0  | 0  |    |   |
| ENSP00000319817           | ENSG00000125741  | OPA3    | 29   | 2  | 1  | 0  | 1  | 1  | 0  | 1  | 1  | 1  | 1  | 1  | 1  | 1  | 1  | 1  | 1  | 1  | 1  | 1  | 1  | 1  | 1  | 1  | 1  | 1  | 1  | 1  | 0  | 1  |    |   |
| ENSP00000319829, ENSP000  | ENSG00000143373  | ZNF687  | 10   | 0  | 1  | 0  | 0  | 1  | 0  | 0  | 1  | 0  | 1  | 0  | 0  | 1  | 0  | 0  | 0  | 0  | 0  | 2  | 0  | 0  | 1  | 1  | 0  | 0  | 1  | 0  | 0  | 0  |    |   |
| ENSP00000319831, ENSP000  | ENSG0000023892   | DEF6    | 17   | 0  | 0  | 0  | 1  | 0  | 0  | 1  | 0  | 0  | 0  | 0  | 0  | 0  | 0  | 0  | 1  | 1  | 0  | 0  | 0  | 1  | 0  | 1  | 0  | 4  | 3  | 0  | 3  | 0  |    |   |
| ENSP00000319851, ENSP000  | ENSG00000163691  | CHDH    | 101  | 7  | 7  | 4  | 6  | 4  | 5  | 4  | 4  | 3  | 2  | 4  | 1  | 1  | 0  | 3  | 2  | 4  | 0  | 2  | 5  | 2  | 6  | 2  | 4  | 6  | 5  | 3  | 0  | 3  | 2  |   |
| ENSP00000319910           | ENSG00000149100  | E1F3M   | 332  | 17 | 7  | 10 | 7  | 6  | 15 | 6  | 3  | 7  | 15 | 3  | 7  | 13 | 11 | 11 | 17 | 14 | 12 | 13 | 8  | 11 | 13 | 1  | 9  | 16 | 21 | 9  | 22 | 10 | 18 |   |
| ENSP00000319918           | ENSG00000129636  | ITFG1   | 11   | 1  | 0  | 1  | 0  | 1  | 1  | 0  | 0  | 0  | 1  | 0  | 0  | 0  | 0  | 0  | 1  | 0  | 1  | 1  | 0  | 0  | 1  | 0  | 1  | 1  | 0  | 0  | 0  | 0  | 0  |   |
| ENSP00000319975, ENSP000  | ENSG00000175470  | PPP2R2D | 51   | 0  | 0  | 0  | 2  | 2  | 0  | 3  | 1  | 0  | 2  | 3  | 1  | 0  | 1  | 1  | 4  | 1  | 0  | 2  | 0  | 1  | 4  | 4  | 1  | 1  | 2  | 0  | 2  | 6  | 0  | 7 |
| ENSP00000319977, ENSP000  | ENSG00000104419  | NDRG1   | 14   | 0  | 0  | 1  | 0  | 0  | 0  | 0  | 0  | 0  | 0  | 1  | 0  | 1  | 0  | 0  | 0  | 1  | 3  | 2  | 2  | 0  | 0  | 1  | 0  | 0  | 2  | 0  | 0  | 0  | 0  |   |
| ENSP00000319992           | ENSG00000178307  | TMEM11  | 22   | 1  | 0  | 1  | 2  | 2  | 0  | 1  | 1  | 0  | 2  | 0  | 1  | 0  | 0  | 0  | 2  | 0  | 1  | 1  | 1  | 0  | 1  | 0  | 1  | 1  | 0  | 1  | 1  |    |    |   |

|                                                 |            |     |    |    |    |    |    |    |    |    |    |    |    |    |    |    |    |    |    |    |    |    |    |    |    |    |    |    |    |    |    |    |   |
|-------------------------------------------------|------------|-----|----|----|----|----|----|----|----|----|----|----|----|----|----|----|----|----|----|----|----|----|----|----|----|----|----|----|----|----|----|----|---|
| ENSP00000322450,ENSP00000322450,ENSP00000322450 | NDUFV1     | 297 | 9  | 13 | 8  | 6  | 12 | 10 | 8  | 9  | 8  | 12 | 8  | 10 | 8  | 8  | 6  | 13 | 18 | 8  | 9  | 9  | 8  | 13 | 12 | 12 | 13 | 12 | 8  | 11 | 11 | 5  |   |
| ENSP00000322524,ENSP00000322524,ENSP00000322524 | DCTP1      | 109 | 5  | 2  | 2  | 3  | 4  | 2  | 4  | 3  | 2  | 0  | 1  | 4  | 4  | 6  | 6  | 5  | 5  | 8  | 5  | 6  | 4  | 0  | 3  | 6  | 0  | 2  | 5  | 4  | 5  |    |   |
| ENSP00000322542,ENSP00000322542,ENSP00000322542 | GTFF2      | 432 | 30 | 20 | 16 | 15 | 12 | 11 | 24 | 16 | 23 | 29 | 17 | 31 | 7  | 6  | 7  | 5  | 10 | 0  | 0  | 0  | 23 | 15 | 14 | 18 | 20 | 9  | 12 | 19 | 17 |    |   |
| ENSP00000322570,ENSP00000322570,ENSP00000322570 | POLE       | 25  | 2  | 0  | 0  | 2  | 0  | 0  | 2  | 0  | 1  | 1  | 0  | 0  | 2  | 1  | 0  | 3  | 2  | 3  | 1  | 0  | 0  | 0  | 1  | 0  | 1  | 0  | 1  | 1  | 1  |    |   |
| ENSP00000322579,ENSP00000322579,ENSP00000322579 | PHF23      | 13  | 0  | 0  | 0  | 0  | 0  | 1  | 0  | 0  | 0  | 0  | 1  | 1  | 0  | 0  | 0  | 2  | 0  | 1  | 3  | 0  | 0  | 2  | 0  | 0  | 1  | 0  | 1  | 0  | 0  |    |   |
| ENSP00000322706,ENSP00000322706,ENSP00000322706 | HMGCS1     | 367 | 31 | 30 | 20 | 19 | 25 | 9  | 14 | 5  | 9  | 0  | 1  | 1  | 15 | 28 | 17 | 4  | 3  | 5  | 16 | 14 | 6  | 8  | 9  | 4  | 26 | 26 | 10 | 2  | 6  | 4  |   |
| ENSP00000322716,ENSP00000322716,ENSP00000322716 | CASK       | 100 | 3  | 2  | 3  | 3  | 3  | 4  | 6  | 1  | 3  | 5  | 3  | 3  | 2  | 4  | 3  | 3  | 5  | 3  | 3  | 2  | 3  | 4  | 4  | 5  | 2  | 5  | 2  | 1  | 6  | 4  |   |
| ENSP00000322727,ENSP00000322727,ENSP00000322727 | ZNF207     | 95  | 8  | 6  | 5  | 4  | 8  | 5  | 1  | 1  | 1  | 1  | 1  | 3  | 1  | 3  | 2  | 2  | 5  | 2  | 1  | 2  | 2  | 4  | 3  | 2  | 6  | 10 | 5  | 0  | 0  | 0  |   |
| ENSP00000322807,ENSP00000322807,ENSP00000322807 | PDXDC1     | 251 | 18 | 8  | 8  | 8  | 14 | 18 | 13 | 8  | 14 | 3  | 1  | 0  | 8  | 7  | 9  | 5  | 7  | 6  | 9  | 11 | 12 | 9  | 4  | 5  | 11 | 14 | 7  | 6  | 5  | 3  |   |
| ENSP00000322845,ENSP00000322845,ENSP00000322845 | ZMYM3      | 43  | 3  | 1  | 6  | 0  | 0  | 1  | 2  | 1  | 1  | 4  | 2  | 3  | 0  | 1  | 0  | 1  | 1  | 2  | 1  | 3  | 1  | 1  | 2  | 1  | 0  | 3  | 1  | 0  | 1  | 0  |   |
| ENSP00000322887,ENSP00000322887,ENSP00000322887 | CIRBP      | 103 | 6  | 3  | 4  | 1  | 2  | 2  | 3  | 3  | 3  | 8  | 3  | 3  | 1  | 0  | 2  | 2  | 4  | 5  | 4  | 6  | 3  | 4  | 3  | 2  | 6  | 4  | 2  | 6  | 4  | 4  |   |
| ENSP00000322909,ENSP00000322909,ENSP00000322909 | FHL2       | 85  | 5  | 3  | 1  | 1  | 2  | 0  | 2  | 2  | 2  | 2  | 1  | 2  | 3  | 2  | 2  | 2  | 7  | 1  | 2  | 5  | 1  | 4  | 1  | 2  | 3  | 5  | 1  | 6  | 10 | 5  |   |
| ENSP00000322915,ENSP00000322915,ENSP00000322915 | ZMYM4      | 43  | 0  | 2  | 1  | 0  | 0  | 1  | 2  | 2  | 0  | 2  | 2  | 0  | 2  | 0  | 2  | 2  | 2  | 3  | 5  | 4  | 2  | 0  | 2  | 1  | 0  | 2  | 1  | 2  | 1  | 0  |   |
| ENSP00000322926,ENSP00000322926,ENSP00000322926 | FARP1      | 46  | 6  | 4  | 5  | 3  | 3  | 2  | 0  | 0  | 0  | 0  | 0  | 1  | 3  | 0  | 3  | 2  | 3  | 2  | 0  | 4  | 1  | 1  | 0  | 0  | 1  | 0  | 0  | 1  | 1  | 0  |   |
| ENSP00000322991,ENSP00000322991,ENSP00000322991 | BCAT2      | 60  | 3  | 1  | 1  | 1  | 2  | 2  | 1  | 2  | 2  | 4  | 0  | 1  | 2  | 0  | 3  | 2  | 2  | 1  | 2  | 3  | 3  | 3  | 2  | 2  | 5  | 0  | 2  | 6  | 0  | 2  |   |
| ENSP00000323036,ENSP00000323036,ENSP00000323036 | ACPP       | 11  | 0  | 0  | 0  | 3  | 5  | 2  | 0  | 0  | 0  | 0  | 0  | 0  | 0  | 0  | 0  | 0  | 0  | 0  | 0  | 0  | 0  | 0  | 0  | 0  | 1  | 0  | 0  | 0  | 0  | 0  |   |
| ENSP00000323046,ENSP00000323046,ENSP00000323046 | EXOSC3     | 78  | 3  | 0  | 3  | 1  | 2  | 2  | 1  | 2  | 2  | 9  | 0  | 2  | 1  | 0  | 3  | 2  | 4  | 2  | 3  | 3  | 3  | 3  | 1  | 3  | 6  | 3  | 0  | 7  | 4  | 3  |   |
| ENSP00000323047,ENSP00000323047,ENSP00000323047 | MTG1       | 43  | 1  | 2  | 2  | 3  | 1  | 1  | 2  | 6  | 1  | 1  | 0  | 4  | 0  | 1  | 0  | 0  | 3  | 1  | 2  | 1  | 1  | 1  | 2  | 2  | 1  | 2  | 0  | 0  | 1  | 1  |   |
| ENSP00000323065,ENSP00000323065,ENSP00000323065 | GADD45GIP1 | 162 | 4  | 5  | 5  | 2  | 6  | 8  | 4  | 5  | 2  | 3  | 6  | 5  | 6  | 2  | 9  | 7  | 6  | 8  | 4  | 9  | 3  | 7  | 7  | 6  | 7  | 9  | 4  | 4  | 5  | 4  |   |
| ENSP00000323071,ENSP00000323071,ENSP00000323071 | ACOT4      | 16  | 0  | 0  | 0  | 2  | 2  | 1  | 0  | 0  | 0  | 0  | 1  | 1  | 2  | 0  | 1  | 0  | 0  | 0  | 2  | 0  | 1  | 1  | 0  | 1  | 0  | 1  | 0  | 0  | 0  | 0  |   |
| ENSP00000323076,ENSP00000323076,ENSP00000323076 | NDUFAF3    | 56  | 2  | 0  | 1  | 1  | 2  | 1  | 2  | 1  | 1  | 4  | 1  | 2  | 2  | 1  | 1  | 1  | 2  | 2  | 1  | 3  | 2  | 3  | 2  | 2  | 2  | 2  | 2  | 4  | 4  | 2  |   |
| ENSP00000323194,ENSP00000323194,ENSP00000323194 | PLXNA2     | 18  | 2  | 0  | 0  | 2  | 0  | 0  | 2  | 0  | 1  | 0  | 1  | 0  | 0  | 0  | 0  | 2  | 0  | 0  | 1  | 1  | 0  | 2  | 1  | 1  | 0  | 1  | 1  | 0  | 0  | 0  |   |
| ENSP00000323264,ENSP00000323264,ENSP00000323264 | MARVELD2   | 10  | 0  | 0  | 0  | 1  | 0  | 1  | 1  | 1  | 1  | 0  | 0  | 0  | 0  | 0  | 0  | 0  | 1  | 0  | 0  | 0  | 0  | 1  | 1  | 0  | 0  | 2  | 0  | 0  | 0  | 0  |   |
| ENSP00000323288,ENSP00000323288,ENSP00000323288 | RUPSD2     | 34  | 2  | 0  | 1  | 0  | 0  | 1  | 1  | 0  | 0  | 1  | 1  | 0  | 2  | 1  | 1  | 1  | 1  | 0  | 2  | 0  | 2  | 0  | 3  | 3  | 3  | 1  | 3  | 2  | 1  | 0  |   |
| ENSP00000323300,ENSP00000323300,ENSP00000323300 | SPAG5      | 28  | 1  | 3  | 1  | 0  | 0  | 1  | 1  | 0  | 1  | 0  | 1  | 0  | 2  | 0  | 1  | 0  | 0  | 3  | 2  | 2  | 2  | 0  | 2  | 0  | 0  | 2  | 0  | 1  | 0  | 2  |   |
| ENSP00000323313,ENSP00000323313,ENSP00000323313 | PDIA5      | 72  | 9  | 4  | 4  | 3  | 4  | 3  | 5  | 2  | 4  | 2  | 1  | 1  | 1  | 0  | 0  | 1  | 6  | 2  | 2  | 2  | 1  | 2  | 0  | 3  | 2  | 3  | 3  | 1  | 0  | 1  |   |
| ENSP00000323353,ENSP00000323353,ENSP00000323353 | UEVLD      | 34  | 0  | 0  | 1  | 3  | 1  | 0  | 4  | 1  | 1  | 1  | 0  | 1  | 1  | 1  | 3  | 2  | 1  | 1  | 2  | 0  | 1  | 0  | 0  | 2  | 1  | 1  | 2  | 2  | 1  | 0  |   |
| ENSP00000323377,ENSP00000323377,ENSP00000323377 | EXOC3      | 53  | 2  | 0  | 1  | 4  | 1  | 4  | 3  | 3  | 2  | 0  | 1  | 3  | 0  | 0  | 2  | 0  | 2  | 2  | 2  | 3  | 2  | 2  | 1  | 1  | 1  | 1  | 2  | 3  | 2  | 2  |   |
| ENSP00000323421,ENSP00000323421,ENSP00000323421 | SCMC1A     | 541 | 14 | 11 | 18 | 17 | 18 | 15 | 20 | 14 | 24 | 44 | 17 | 15 | 14 | 9  | 20 | 12 | 14 | 11 | 24 | 23 | 20 | 27 | 16 | 17 | 20 | 17 | 10 | 23 | 21 | 16 |   |
| ENSP00000323424,ENSP00000323424,ENSP00000323424 | ISG201     | 27  | 1  | 0  | 2  | 2  | 0  | 1  | 0  | 0  | 1  | 1  | 0  | 1  | 1  | 0  | 1  | 0  | 0  | 1  | 1  | 0  | 0  | 1  | 1  | 4  | 1  | 1  | 2  | 2  | 1  | 1  |   |
| ENSP00000323439,ENSP00000323439,ENSP00000323439 | STAC1      | 39  | 0  | 0  | 1  | 1  | 2  | 0  | 3  | 0  | 1  | 4  | 2  | 1  | 0  | 5  | 0  | 2  | 1  | 0  | 2  | 3  | 1  | 4  | 1  | 1  | 0  | 1  | 0  | 1  | 1  | 1  |   |
| ENSP00000323443,ENSP00000323443,ENSP00000323443 | SMUG1      | 244 | 14 | 19 | 9  | 9  | 6  | 7  | 8  | 3  | 8  | 12 | 7  | 5  | 8  | 10 | 7  | 4  | 6  | 12 | 9  | 7  | 8  | 7  | 6  | 6  | 10 | 6  | 6  | 11 | 7  | 7  |   |
| ENSP00000323511,ENSP00000323511,ENSP00000323511 | PNKP       | 106 | 2  | 5  | 4  | 2  | 3  | 5  | 4  | 5  | 4  | 3  | 2  | 3  | 1  | 2  | 3  | 3  | 3  | 3  | 4  | 6  | 4  | 3  | 4  | 2  | 5  | 4  | 5  | 3  | 5  | 4  |   |
| ENSP00000323527,ENSP00000323527,ENSP00000323527 | MKLN1      | 17  | 1  | 1  | 0  | 1  | 0  | 0  | 1  | 0  | 1  | 0  | 0  | 1  | 0  | 1  | 1  | 0  | 1  | 2  | 1  | 0  | 0  | 0  | 0  | 1  | 0  | 0  | 0  | 0  | 3  | 1  |   |
| ENSP00000323580,ENSP00000323580,ENSP00000323580 | IFT88      | 18  | 1  | 1  | 0  | 0  | 4  | 0  | 2  | 1  | 1  | 0  | 0  | 0  | 1  | 0  | 0  | 0  | 0  | 1  | 0  | 2  | 1  | 0  | 1  | 1  | 0  | 0  | 0  | 1  | 0  | 0  |   |
| ENSP00000323680,ENSP00000323680,ENSP00000323680 | WDR23      | 11  | 0  | 0  | 0  | 1  | 0  | 1  | 0  | 0  | 1  | 0  | 0  | 0  | 2  | 0  | 1  | 0  | 0  | 0  | 0  | 1  | 0  | 0  | 0  | 0  | 0  | 0  | 0  | 1  | 2  | 1  |   |
| ENSP00000323687,ENSP00000323687,ENSP00000323687 | UBE2O      | 55  | 5  | 3  | 1  | 3  | 0  | 1  | 4  | 0  | 0  | 1  | 0  | 1  | 2  | 0  | 0  | 3  | 4  | 2  | 4  | 4  | 1  | 1  | 2  | 1  | 3  | 2  | 4  | 1  | 1  | 1  |   |
| ENSP00000323696,ENSP00000323696,ENSP00000323696 | CRTPA      | 21  | 2  | 1  | 2  | 1  | 0  | 0  | 0  | 0  | 0  | 1  | 0  | 1  | 1  | 0  | 0  | 0  | 1  | 0  | 0  | 0  | 0  | 0  | 1  | 1  | 0  | 1  | 1  | 1  | 3  | 3  |   |
| ENSP00000323720,ENSP00000323720,ENSP00000323720 | MED14      | 36  | 1  | 0  | 1  | 2  | 0  | 1  | 3  | 1  | 0  | 1  | 1  | 2  | 3  | 0  | 2  | 1  | 0  | 2  | 1  | 3  | 1  | 3  | 1  | 4  | 0  | 0  | 1  | 0  | 1  | 0  |   |
| ENSP00000323755,ENSP00000323755,ENSP00000323755 | TMEM181    | 13  | 0  | 0  | 0  | 1  | 0  | 0  | 1  | 0  | 0  | 0  | 0  | 1  | 0  | 1  | 1  | 0  | 1  | 0  | 0  | 2  | 1  | 0  | 0  | 0  | 1  | 1  | 1  | 0  | 1  | 0  |   |
| ENSP00000323782,ENSP00000323782,ENSP00000323782 | CDC43      | 53  | 4  | 2  | 2  | 1  | 1  | 0  | 3  | 2  | 2  | 0  | 1  | 0  | 2  | 2  | 2  | 3  | 2  | 0  | 2  | 4  | 3  | 1  | 2  | 0  | 2  | 0  | 3  | 2  | 2  | 3  |   |
| ENSP00000323811,ENSP00000323811,ENSP00000323811 | HACL1      | 30  | 2  | 3  | 2  | 1  | 0  | 0  | 2  | 2  | 1  | 0  | 2  | 2  | 0  | 0  | 1  | 0  | 0  | 1  | 1  | 1  | 1  | 3  | 2  | 0  | 0  | 0  | 1  | 0  | 1  | 1  |   |
| ENSP00000323822,ENSP00000323822,ENSP00000323822 | FBXO11     | 13  | 1  | 1  | 1  | 0  | 0  | 0  | 0  | 1  | 0  | 0  | 0  | 0  | 0  | 1  | 0  | 0  | 1  | 2  | 1  | 0  | 0  | 0  | 0  | 0  | 0  | 0  | 0  | 1  | 2  | 1  |   |
| ENSP00000323837,ENSP00000323837,ENSP00000323837 | SLC4A1AP   | 63  | 4  | 5  | 3  | 4  | 2  | 2  | 2  | 2  | 0  | 0  | 2  | 2  | 2  | 0  | 4  | 1  | 3  | 2  | 2  | 3  | 2  | 1  | 1  | 2  | 1  | 0  | 2  | 0  | 5  | 3  |   |
| ENSP00000323856,ENSP00000323856,ENSP00000323856 | PLEC1      | 30  | 0  | 0  | 0  | 2  | 0  | 1  | 0  | 0  | 0  | 11 | 0  | 5  | 0  | 1  | 2  | 1  | 0  | 3  | 1  | 0  | 1  | 0  | 0  | 1  | 0  | 0  | 0  | 0  | 0  | 1  |   |
| ENSP00000323867,ENSP00000323867,ENSP00000323867 | PRKAG1     | 61  | 1  | 2  | 2  | 3  | 3  | 4  | 3  | 1  | 5  | 0  | 0  | 0  | 2  | 0  | 2  | 3  | 2  | 2  | 2  | 4  | 1  | 2  | 1  | 0  | 3  | 3  | 4  | 3  | 1  | 2  | 2 |
| ENSP00000323889,ENSP00000323889,ENSP00000323889 | TRIM25     | 303 | 13 | 6  | 9  | 8  | 11 | 13 | 10 | 9  | 9  | 14 | 4  | 6  | 10 | 6  | 7  | 16 | 15 | 12 | 6  | 10 | 8  | 10 | 5  | 9  | 13 | 20 | 8  | 17 | 9  | 10 |   |
| ENSP00000323889,ENSP00000323889,ENSP00000323889 | TRIM25     | 256 | 9  | 6  | 8  | 8  | 10 | 9  | 10 | 9  | 8  | 10 | 4  | 5  | 8  | 4  | 6  | 12 | 12 | 9  | 6  | 9  | 6  | 6  | 4  | 7  | 9  | 17 | 7  | 18 | 9  | 11 |   |
| ENSP00000323967,ENSP00000323967,ENSP00000323967 | SMARCE1    | 105 | 5  | 3  | 3  | 2  | 1  | 1  | 2  | 2  | 3  | 4  | 5  | 2  | 5  | 5  | 2  | 5  | 4  | 2  | 3  | 7  | 5  | 4  | 7  | 3  | 6  | 3  | 4  | 5  | 1  | 1  | 1 |
| ENSP00000324020,ENSP00000324020,ENSP00000324020 | KIF15      | 40  | 3  | 3  | 1  | 3  | 1  | 1  | 2  | 0  | 2  | 3  | 0  | 1  | 1  | 2  | 0  | 2  | 0  | 1  | 3  | 0  | 0  | 0  | 1  | 0  | 3  | 1  |    |    |    |    |   |

|                          |                  |          |      |     |     |    |    |     |    |    |    |    |    |    |    |     |     |    |     |     |     |     |     |    |     |     |    |     |     |    |     |     |     |   |
|--------------------------|------------------|----------|------|-----|-----|----|----|-----|----|----|----|----|----|----|----|-----|-----|----|-----|-----|-----|-----|-----|----|-----|-----|----|-----|-----|----|-----|-----|-----|---|
| ENSP00000325548_G1395    | ENSG00000133313  | CNDP2    | 297  | 13  | 8   | 9  | 10 | 13  | 18 | 7  | 5  | 11 | 5  | 2  | 2  | 6   | 9   | 10 | 9   | 9   | 12  | 11  | 7   | 10 | 8   | 5   | 6  | 14  | 13  | 16 | 16  | 12  | 21  |   |
| ENSP00000325562          | ENSP00000173436  | Clorf151 | 11   | 0   | 0   | 1  | 1  | 0   | 0  | 1  | 1  | 0  | 0  | 1  | 1  | 0   | 0   | 0  | 0   | 0   | 0   | 0   | 0   | 1  | 0   | 0   | 0  | 0   | 0   | 1  | 1   | 0   | 1   |   |
| ENSP00000325618          | ENSP00000096384  | PARP10   | 18   | 0   | 1   | 1  | 1  | 1   | 1  | 0  | 1  | 0  | 0  | 0  | 0  | 0   | 0   | 0  | 0   | 1   | 1   | 1   | 1   | 1  | 0   | 0   | 1  | 1   | 0   | 1  | 1   | 2   | 1   |   |
| ENSP00000325655          | ENSG00000125611  | CHGDH5   | 29   | 1   | 0   | 2  | 0  | 0   | 0  | 1  | 1  | 0  | 0  | 0  | 0  | 3   | 0   | 2  | 2   | 1   | 0   | 2   | 2   | 2  | 2   | 1   | 2  | 2   | 2   | 1  | 0   | 0   | 0   |   |
| ENSP00000325677          | ENSP00000103549  | RNF40    | 148  | 9   | 3   | 4  | 3  | 3   | 2  | 8  | 3  | 2  | 3  | 2  | 3  | 8   | 2   | 7  | 3   | 5   | 8   | 5   | 8   | 9  | 9   | 3   | 2  | 6   | 4   | 2  | 7   | 5   | 10  |   |
| ENSP00000325690          | ENSP00000142453  | CARM1    | 123  | 5   | 3   | 3  | 4  | 5   | 3  | 2  | 1  | 2  | 0  | 0  | 1  | 5   | 2   | 3  | 4   | 6   | 7   | 4   | 7   | 7  | 4   | 3   | 2  | 7   | 5   | 3  | 8   | 8   | 6   |   |
| ENSP00000325748          | ENSP00000115694  | CTK25    | 112  | 4   | 6   | 3  | 5  | 5   | 6  | 4  | 4  | 2  | 4  | 1  | 2  | 3   | 2   | 3  | 3   | 5   | 3   | 6   | 5   | 5  | 2   | 1   | 1  | 8   | 2   | 2  | 6   | 4   | 5   |   |
| ENSP00000325785_rs204711 | ENSG00000100014  | MYT1A    | 29   | 3   | 3   | 2  | 1  | 0   | 0  | 0  | 0  | 0  | 0  | 1  | 2  | 1   | 0   | 4  | 2   | 1   | 1   | 0   | 1   | 0  | 1   | 0   | 0  | 2   | 1   | 0  | 1   | 0   | 2   |   |
| ENSP00000325863          | ENSP0000020922   | MRE11A   | 148  | 14  | 8   | 5  | 8  | 9   | 7  | 10 | 7  | 7  | 7  | 4  | 6  | 6   | 3   | 4  | 3   | 2   | 1   | 6   | 6   | 3  | 5   | 6   | 3  | 0   | 2   | 0  | 2   | 3   | 1   |   |
| ENSP00000325875          | ENSP00000096384  | HSP90A81 | 3376 | 130 | 115 | 97 | 61 | 101 | 50 | 98 | 72 | 78 | 94 | 49 | 36 | 117 | 161 | 94 | 151 | 178 | 124 | 118 | 203 | 98 | 112 | 100 | 54 | 133 | 151 | 95 | 208 | 177 | 121 |   |
| ENSP00000325905          | ENSP00000115875  | SFRS5    | 235  | 9   | 8   | 7  | 1  | 9   | 9  | 8  | 6  | 7  | 10 | 8  | 8  | 6   | 6   | 10 | 7   | 9   | 11  | 4   | 6   | 11 | 10  | 9   | 11 | 7   | 11  | 7  | 8   | 5   | 7   |   |
| ENSP00000325919          | ENSG00000128789  | PSMG2    | 57   | 2   | 2   | 1  | 2  | 1   | 0  | 2  | 1  | 1  | 1  | 1  | 2  | 4   | 1   | 2  | 2   | 2   | 2   | 5   | 4   | 2  | 0   | 1   | 1  | 3   | 3   | 1  | 2   | 4   | 2   |   |
| ENSP00000325941          | ENSP00000177963  | RIC8A    | 84   | 3   | 2   | 4  | 3  | 2   | 2  | 1  | 3  | 4  | 1  | 1  | 3  | 1   | 2   | 5  | 3   | 1   | 1   | 2   | 2   | 5  | 1   | 1   | 2  | 4   | 2   | 2  | 9   | 3   | 9   |   |
| ENSP00000325946_H139Q    | ENSG00000079385  | CEACAM1  | 11   | 0   | 0   | 0  | 0  | 0   | 0  | 0  | 1  | 0  | 0  | 0  | 0  | 0   | 0   | 0  | 0   | 0   | 0   | 0   | 0   | 0  | 0   | 5   | 3  | 2   | 0   | 0  | 0   | 0   | 0   |   |
| ENSP00000325958          | ENSG00000110536  | PTPMT1   | 31   | 1   | 0   | 1  | 2  | 1   | 1  | 2  | 1  | 0  | 4  | 1  | 1  | 0   | 0   | 0  | 0   | 1   | 0   | 2   | 1   | 2  | 1   | 1   | 0  | 1   | 1   | 1  | 2   | 2   | 1   |   |
| ENSP00000325970          | ENSP00000170312  | CDC2     | 121  | 12  | 7   | 14 | 2  | 6   | 2  | 6  | 3  | 4  | 2  | 3  | 1  | 4   | 4   | 3  | 5   | 4   | 3   | 5   | 5   | 4  | 2   | 2   | 0  | 2   | 3   | 2  | 4   | 4   | 3   |   |
| ENSP00000326003          | ENSP00000162927  | PUS10    | 11   | 0   | 1   | 1  | 1  | 1   | 0  | 0  | 1  | 1  | 0  | 0  | 0  | 1   | 1   | 0  | 0   | 0   | 0   | 0   | 0   | 0  | 1   | 0   | 0  | 0   | 1   | 0  | 1   | 0   | 0   |   |
| ENSP00000326010          | ENSP00000111679  | PTPN6    | 82   | 2   | 4   | 5  | 4  | 9   | 4  | 6  | 1  | 2  | 1  | 0  | 3  | 1   | 2   | 2  | 2   | 2   | 2   | 3   | 5   | 2  | 4   | 2   | 2  | 2   | 3   | 4  | 5   | 0   | 0   |   |
| ENSP00000326031          | ENSP00000172531  | PP1CA    | 255  | 14  | 6   | 9  | 2  | 5   | 10 | 6  | 5  | 8  | 19 | 2  | 9  | 7   | 4   | 12 | 9   | 5   | 12  | 2   | 7   | 17 | 10  | 2   | 9  | 18  | 6   | 10 | 15  | 3   | 12  |   |
| ENSP00000326101          | ENSP00000130723  | BATZL    | 29   | 1   | 0   | 1  | 1  | 1   | 2  | 3  | 0  | 0  | 1  | 3  | 1  | 1   | 1   | 3  | 0   | 0   | 2   | 1   | 1   | 1  | 0   | 0   | 0  | 0   | 0   | 0  | 2   | 1   | 1   | 2 |
| ENSP00000326261          | ENSP00000133226  | SRRM1    | 65   | 2   | 1   | 0  | 2  | 1   | 1  | 1  | 4  | 1  | 5  | 2  | 2  | 2   | 1   | 3  | 1   | 0   | 3   | 3   | 1   | 3  | 3   | 2   | 2  | 3   | 2   | 2  | 5   | 3   | 4   |   |
| ENSP00000326342          | ENSG00000179387  | ELMOD2   | 22   | 2   | 0   | 1  | 2  | 0   | 1  | 2  | 0  | 0  | 1  | 0  | 0  | 2   | 0   | 2  | 2   | 0   | 2   | 3   | 0   | 1  | 0   | 0   | 0  | 0   | 1   | 0  | 0   | 0   | 0   |   |
| ENSP00000326366          | ENSP00000080815  | PSEN1    | 16   | 2   | 0   | 0  | 0  | 1   | 1  | 0  | 0  | 1  | 0  | 0  | 1  | 0   | 0   | 0  | 1   | 0   | 1   | 0   | 1   | 0  | 1   | 0   | 1  | 2   | 1   | 1  | 1   | 0   | 0   |   |
| ENSP00000326379          | ENSP00000138614  | C15orf44 | 13   | 0   | 0   | 0  | 0  | 0   | 0  | 1  | 0  | 2  | 0  | 0  | 0  | 1   | 0   | 0  | 0   | 1   | 0   | 1   | 0   | 1  | 0   | 1   | 0  | 2   | 0   | 1  | 0   | 2   | 0   |   |
| ENSP00000326381          | ENSG00000156976  | E1FA2    | 713  | 38  | 25  | 18 | 9  | 30  | 17 | 23 | 10 | 13 | 23 | 10 | 13 | 17  | 25  | 26 | 28  | 25  | 25  | 26  | 51  | 23 | 23  | 17  | 10 | 33  | 38  | 22 | 32  | 30  | 33  |   |
| ENSP00000326381_M307V    | ENSG00000156976  | E1FA2    | 697  | 37  | 25  | 18 | 9  | 30  | 17 | 21 | 10 | 12 | 13 | 10 | 13 | 17  | 25  | 24 | 28  | 23  | 24  | 23  | 48  | 21 | 22  | 17  | 10 | 33  | 38  | 22 | 33  | 30  | 34  |   |
| ENSP00000326411          | ENSG00000095485  | CWF19L1  | 87   | 4   | 4   | 3  | 4  | 5   | 5  | 2  | 1  | 2  | 2  | 1  | 1  | 2   | 2   | 2  | 3   | 4   | 2   | 2   | 3   | 6  | 4   | 3   | 4  | 2   | 4   | 2  | 2   | 2   | 2   |   |
| ENSP00000326411_rs33490  | ENSG00000095485  | CWF19L1  | 75   | 4   | 2   | 3  | 3  | 3   | 4  | 2  | 1  | 2  | 2  | 0  | 1  | 2   | 1   | 2  | 3   | 4   | 4   | 2   | 1   | 3  | 5   | 3   | 3  | 4   | 2   | 4  | 1   | 1   | 3   |   |
| ENSP00000326424          | ENSP00000172890  | NADSYN1  | 16   | 2   | 1   | 3  | 2  | 0   | 0  | 2  | 1  | 1  | 0  | 0  | 0  | 1   | 0   | 0  | 0   | 0   | 1   | 0   | 0   | 0  | 0   | 0   | 0  | 1   | 0   | 0  | 0   | 0   | 1   |   |
| ENSP00000326473          | ENSP00000169139  | UBE2V2   | 183  | 10  | 6   | 13 | 5  | 8   | 6  | 6  | 2  | 6  | 6  | 4  | 1  | 2   | 7   | 6  | 6   | 6   | 5   | 3   | 9   | 6  | 4   | 4   | 3  | 12  | 6   | 6  | 9   | 8   | 8   |   |
| ENSP00000326514          | ENSG00000090989  | EXOC1    | 82   | 3   | 2   | 4  | 6  | 7   | 4  | 3  | 3  | 2  | 1  | 0  | 0  | 1   | 1   | 2  | 1   | 4   | 0   | 4   | 4   | 1  | 5   | 5   | 2  | 5   | 5   | 4  | 1   | 1   | 1   |   |
| ENSP00000326531          | ENSG00000131652  | THOC6    | 42   | 2   | 1   | 1  | 2  | 1   | 0  | 2  | 0  | 1  | 4  | 0  | 0  | 1   | 0   | 2  | 1   | 2   | 1   | 1   | 1   | 2  | 2   | 1   | 2  | 2   | 2   | 2  | 2   | 2   | 2   |   |
| ENSP00000326534          | ENSP00000166887  | VP539    | 10   | 0   | 1   | 0  | 0  | 0   | 2  | 3  | 0  | 0  | 0  | 0  | 0  | 0   | 0   | 0  | 1   | 0   | 0   | 1   | 0   | 0  | 0   | 0   | 0  | 0   | 0   | 1  | 0   | 1   | 0   |   |
| ENSP00000326550          | ENSP000000013810 | TACD3    | 62   | 5   | 5   | 4  | 3  | 1   | 5  | 0  | 1  | 1  | 0  | 0  | 2  | 2   | 3   | 1  | 1   | 2   | 1   | 3   | 4   | 1  | 3   | 0   | 1  | 3   | 0   | 2  | 1   | 4   | 3   |   |
| ENSP00000326563_rs6854   | ENSP00000120733  | JMJD1B   | 171  | 10  | 5   | 5  | 6  | 5   | 5  | 10 | 5  | 3  | 7  | 1  | 4  | 4   | 1   | 7  | 4   | 5   | 7   | 8   | 7   | 10 | 11  | 3   | 4  | 2   | 9   | 7  | 3   | 6   | 5   | 5 |
| ENSP00000326579          | ENSP000000004961 | HCC5     | 144  | 7   | 1   | 5  | 5  | 3   | 6  | 5  | 2  | 0  | 13 | 3  | 9  | 3   | 2   | 5  | 9   | 4   | 6   | 4   | 3   | 5  | 8   | 3   | 5  | 5   | 1   | 4  | 8   | 4   | 6   |   |
| ENSP00000326603          | ENSG00000180715  |          | 76   | 5   | 3   | 2  | 3  | 0   | 1  | 4  | 1  | 3  | 1  | 1  | 3  | 6   | 1   | 2  | 3   | 4   | 2   | 4   | 3   | 3  | 5   | 2   | 3  | 3   | 2   | 1  | 0   | 2   | 3   |   |
| ENSP00000326706          | ENSP00000169094  | PLEKHO2  | 10   | 0   | 1   | 0  | 0  | 0   | 2  | 0  | 0  | 0  | 0  | 0  | 0  | 0   | 0   | 0  | 0   | 0   | 0   | 0   | 0   | 0  | 0   | 0   | 0  | 1   | 0   | 0  | 0   | 1   | 2   |   |
| ENSP00000326753          | ENSP00000143337  | TOR1AI1P | 70   | 2   | 2   | 1  | 2  | 1   | 1  | 3  | 2  | 2  | 4  | 3  | 2  | 1   | 2   | 1  | 3   | 4   | 3   | 4   | 3   | 1  | 4   | 3   | 3  | 1   | 1   | 1  | 5   | 3   | 2   |   |
| ENSP00000326804          | ENSP000000055130 | CUL1     | 146  | 8   | 2   | 8  | 3  | 1   | 4  | 5  | 3  | 4  | 11 | 0  | 4  | 3   | 1   | 5  | 6   | 6   | 5   | 1   | 7   | 8  | 6   | 0   | 5  | 4   | 4   | 3  | 14  | 6   | 9   |   |
| ENSP00000326806          | ENSG00000114503  | NCBP2    | 85   | 6   | 2   | 2  | 5  | 7   | 2  | 6  | 1  | 1  | 4  | 2  | 2  | 2   | 2   | 2  | 2   | 3   | 2   | 2   | 3   | 2  | 4   | 2   | 2  | 2   | 3   | 4  | 1   | 3   | 4   | 2 |
| ENSP00000326817          | ENSP00000180979  | LRRC57   | 35   | 0   | 0   | 2  | 2  | 2   | 2  | 1  | 1  | 1  | 0  | 0  | 0  | 1   | 2   | 1  | 1   | 2   | 1   | 1   | 3   | 1  | 2   | 2   | 1  | 2   | 1   | 1  | 0   | 1   | 1   |   |
| ENSP00000326841          | ENSP00000123352  | SPATS2   | 55   | 8   | 6   | 1  | 2  | 1   | 0  | 0  | 1  | 2  | 0  | 0  | 0  | 0   | 0   | 2  | 2   | 3   | 4   | 1   | 1   | 2  | 2   | 4   | 2  | 2   | 1   | 3  | 0   | 1   | 3   | 1 |
| ENSP00000326858          | ENSG00000178425  | NTSDC1   | 52   | 3   | 2   | 3  | 1  | 2   | 1  | 2  | 0  | 2  | 0  | 0  | 0  | 0   | 0   | 0  | 4   | 3   | 4   | 3   | 2   | 3  | 2   | 2   | 2  | 2   | 1   | 2  | 1   | 2   | 3   |   |
| ENSP00000326869          | ENSP00000128699  | ORMDL1   | 14   | 2   | 0   | 0  | 0  | 1   | 1  | 1  | 1  | 0  | 0  | 0  | 0  | 0   | 0   | 0  | 0   | 0   | 0   | 0   | 1   | 1  | 1   | 0   | 0  | 0   | 0   | 1  | 1   | 1   | 1   |   |
| ENSP00000326879          | ENSP00000082213  | C5orf22  | 34   | 2   | 1   | 0  | 0  | 2   | 1  | 1  | 1  | 2  | 0  | 0  | 0  | 0   | 1   | 1  | 2   | 0   | 5   | 0   | 1   | 1  | 0   | 2   | 1  | 1   | 1   | 1  | 2   | 1   | 2   |   |
| ENSP00000326924          | ENSP00000140386  | SCAPER   | 10   | 0   | 1   | 1  | 0  | 0   | 1  | 0  | 1  | 0  | 0  | 0  | 0  | 0   | 0   | 0  | 1   | 0   | 0   | 0   | 0   | 1  | 0   | 0   | 0  | 0   | 0   | 0  | 2   | 0   | 1   |   |
| ENSP00000326981          | ENSP00000177971  | IMP3     | 90   | 3   | 0   | 4  | 3  | 4   | 2  | 2  | 2  | 2  | 2  | 2  | 3  | 2   | 2   | 4  | 2   | 4   | 3   | 1   | 3   | 4  | 3   | 5   | 2  | 3   | 5   | 2  | 5   | 7   | 4   |   |
| ENSP00000327054          | ENSG00000176619  | LMNB2    | 816  | 25  | 21  | 17 | 17 | 16  | 15 | 22 | 19 | 16 | 37 | 26 | 35 | 29  | 28  | 32 | 22  | 27  | 35  | 35  | 32  | 32 | 40  | 32  | 26 | 33  | 30  | 24 | 37  | 30  | 26  |   |
| ENSP00000327054_A237T    | ENSG00000176619  | LMNB2    | 791  | 25  | 21  | 17 | 17 | 16  | 15 | 20 | 16 | 16 | 36 | 25 | 32 | 28  | 27  | 29 | 21  | 28  | 35  | 33  | 30  | 40 | 31  | 31  | 32 | 29  | 23  | 37 | 29  | 25  |     |   |
| ENSP00000327054_V224A    | ENSG00000176619  | LMNB2    | 782  | 23  | 19  | 16 | 16 | 15  | 13 | 22 | 16 | 15 | 35 | 25 | 33 | 29  | 25  | 34 | 22  | 27  | 33  | 35  | 29  | 33 | 39  | 30  | 24 | 32  | 30  | 22 |     |     |     |   |

|                          |                 |                 |      |    |    |    |    |    |    |    |    |    |    |    |    |    |    |    |    |    |    |    |    |     |    |    |    |     |    |    |     |    |    |    |   |
|--------------------------|-----------------|-----------------|------|----|----|----|----|----|----|----|----|----|----|----|----|----|----|----|----|----|----|----|----|-----|----|----|----|-----|----|----|-----|----|----|----|---|
| ENSP00000329161_r534587f | ENSG00000184640 | SEPT9           | 432  | 23 | 17 | 17 | 10 | 14 | 16 | 14 | 14 | 21 | 22 | 11 | 9  | 13 | 16 | 19 | 7  | 22 | 16 | 13 | 20 | 17  | 12 | 13 | 10 | 18  | 13 | 12 | 6   | 8  | 9  |    |   |
| ENSP00000329243_A390T    | ENSG00000135480 | KRT7            | 827  | 50 | 9  | 15 | 15 | 26 | 15 | 41 | 42 | 36 | 75 | 7  | 19 | 27 | 8  | 18 | 60 | 72 | 46 | 15 | 25 | 20  | 66 | 23 | 44 | 25  | 14 | 9  | 1   | 2  | 2  |    |   |
| ENSP00000329250_ENSP0000 | ENSG00000184701 | ANP32C          | 145  | 4  | 4  | 4  | 2  | 5  | 5  | 6  | 6  | 4  | 7  | 3  | 3  | 4  | 3  | 3  | 5  | 8  | 6  | 4  | 6  | 5   | 5  | 4  | 4  | 7   | 8  | 6  | 5   | 4  | 5  |    |   |
| ENSP00000329360_ENSP0000 | ENSG00000185298 | CDC137          | 48   | 2  | 1  | 1  | 4  | 0  | 1  | 0  | 1  | 1  | 0  | 3  | 2  | 3  | 2  | 0  | 1  | 2  | 1  | 4  | 4  | 1   | 3  | 3  | 2  | 1   | 1  | 0  | 1   | 1  | 1  |    |   |
| ENSP00000329399_Q167R,P  | ENSG00000196502 | SULT1A1         | 10   | 0  | 0  | 0  | 0  | 1  | 0  | 0  | 0  | 1  | 0  | 0  | 1  | 0  | 0  | 0  | 0  | 0  | 0  | 0  | 0  | 0   | 0  | 4  | 0  | 2   | 0  | 1  | 0   | 0  | 0  |    |   |
| ENSP00000329419          | ENSG00000184432 | COPB2           | 513  | 30 | 13 | 18 | 28 | 25 | 24 | 29 | 10 | 16 | 12 | 1  | 8  | 14 | 5  | 14 | 21 | 19 | 17 | 23 | 17 | 20  | 22 | 5  | 10 | 30  | 19 | 21 | 17  | 12 | 13 |    |   |
| ENSP00000329528_ENSP0000 | ENSG00000079246 | GRXC5           | 760  | 31 | 31 | 29 | 15 | 18 | 17 | 15 | 19 | 22 | 48 | 14 | 15 | 19 | 24 | 22 | 30 | 31 | 17 | 30 | 33 | 30  | 23 | 23 | 28 | 25  | 24 | 48 | 21  | 28 |    |    |   |
| ENSP00000329558          | ENSG00000164284 | GRPEL2          | 46   | 2  | 0  | 0  | 0  | 1  | 2  | 0  | 2  | 0  | 1  | 2  | 0  | 0  | 1  | 0  | 2  | 1  | 3  | 1  | 2  | 3   | 3  | 2  | 1  | 3   | 4  | 2  | 2   | 2  | 4  | 0  |   |
| ENSP00000329586_ENSP0000 | ENSG00000185238 | PRMT3           | 34   | 0  | 1  | 0  | 2  | 3  | 2  | 2  | 0  | 1  | 3  | 1  | 1  | 3  | 0  | 1  | 3  | 2  | 1  | 1  | 0  | 0   | 0  | 1  | 0  | 1   | 2  | 0  | 1   | 1  | 1  |    |   |
| ENSP00000329614_ENSP0000 | ENSG00000182362 | C21orf57        | 23   | 0  | 0  | 0  | 1  | 0  | 1  | 0  | 0  | 0  | 0  | 0  | 2  | 2  | 0  | 1  | 2  | 1  | 1  | 1  | 1  | 1   | 2  | 1  | 0  | 2   | 1  | 2  | 1   | 0  | 0  |    |   |
| ENSP00000329662_ENSP0000 | ENSG00000184897 | H1FX            | 24   | 0  | 0  | 0  | 0  | 0  | 1  | 1  | 0  | 0  | 0  | 1  | 2  | 1  | 0  | 0  | 1  | 0  | 0  | 0  | 1  | 2   | 2  | 4  | 1  | 2   | 1  | 1  | 2   | 1  | 0  |    |   |
| ENSP00000329715          | ENSG00000185721 | DRG1            | 412  | 18 | 16 | 17 | 9  | 12 | 12 | 7  | 7  | 9  | 13 | 8  | 13 | 14 | 14 | 14 | 10 | 16 | 17 | 13 | 19 | 17  | 13 | 10 | 9  | 18  | 19 | 12 | 22  | 17 | 17 |    |   |
| ENSP00000329797_ENSP0000 | ENSG00000182895 | CADM1           | 24   | 6  | 4  | 5  | 0  | 0  | 0  | 0  | 0  | 0  | 1  | 0  | 1  | 0  | 0  | 1  | 0  | 0  | 0  | 2  | 0  | 1   | 0  | 0  | 0  | 0   | 0  | 0  | 0   | 2  | 1  |    |   |
| ENSP00000329867          | ENSG00000214517 | ENSP00000329867 | 78   | 8  | 5  | 3  | 3  | 0  | 0  | 4  | 0  | 1  | 6  | 0  | 2  | 2  | 2  | 2  | 3  | 2  | 3  | 4  | 3  | 2   | 4  | 0  | 1  | 4   | 1  | 1  | 7   | 1  | 4  |    |   |
| ENSP00000329915_ENSP0000 | ENSG00000183527 | PSMG1           | 20   | 1  | 1  | 1  | 1  | 0  | 0  | 2  | 0  | 0  | 0  | 1  | 0  | 1  | 1  | 1  | 0  | 1  | 1  | 1  | 3  | 1   | 0  | 0  | 2  | 0   | 0  | 1  | 0   | 0  | 1  |    |   |
| ENSP00000329957_ENSP0000 | ENSG00000185324 | CDK10           | 31   | 1  | 0  | 0  | 1  | 2  | 1  | 1  | 1  | 0  | 0  | 1  | 0  | 2  | 1  | 1  | 2  | 1  | 1  | 1  | 1  | 1   | 1  | 2  | 1  | 1   | 1  | 1  | 1   | 1  | 2  |    |   |
| ENSP00000329967_ENSP0000 | ENSG00000183735 | TBK1            | 83   | 3  | 2  | 1  | 5  | 1  | 1  | 7  | 6  | 3  | 0  | 0  | 0  | 2  | 0  | 1  | 5  | 3  | 2  | 4  | 4  | 2   | 5  | 1  | 3  | 1   | 4  | 1  | 7   | 4  | 5  |    |   |
| ENSP00000330017_rs11546: | ENSG00000183093 | MRPL12          | 15   | 1  | 0  | 1  | 0  | 0  | 0  | 0  | 0  | 0  | 0  | 0  | 2  | 0  | 0  | 0  | 0  | 2  | 3  | 1  | 0  | 0   | 0  | 0  | 2  | 1   | 0  | 1  | 0   | 1  | 0  |    |   |
| ENSP00000330032_ENSP0000 | ENSG00000183696 | UPP1            | 121  | 2  | 1  | 1  | 2  | 1  | 2  | 0  | 1  | 0  | 5  | 0  | 4  | 0  | 1  | 0  | 4  | 8  | 5  | 3  | 0  | 0   | 2  | 6  | 0  | 4   | 0  | 0  | 1   | 34 | 16 | 18 |   |
| ENSP00000330054_ENSP0000 | ENSG00000156508 | EEF1A1,EEF1A    | 1886 | 98 | 29 | 79 | 48 | 50 | 59 | 54 | 19 | 65 | 72 | 4  | 33 | 67 | 19 | 57 | 65 | 66 | 78 | 86 | 67 | 100 | 65 | 12 | 52 | 132 | 73 | 64 | 129 | 55 | 89 |    |   |
| ENSP00000330060_ENSP0000 | ENSG00000182973 | CNOT10          | 31   | 1  | 1  | 1  | 4  | 0  | 1  | 2  | 0  | 1  | 0  | 0  | 1  | 1  | 1  | 1  | 1  | 2  | 1  | 1  | 0  | 2   | 0  | 0  | 1  | 2   | 1  | 1  | 2   | 0  | 2  |    |   |
| ENSP00000330091          | ENSG00000132153 | DHX30           | 38   | 3  | 3  | 3  | 1  | 1  | 2  | 2  | 0  | 0  | 1  | 1  | 0  | 0  | 1  | 0  | 3  | 1  | 1  | 0  | 3  | 2   | 0  | 2  | 0  | 2   | 2  | 0  | 0   | 2  | 2  |    |   |
| ENSP00000330101_E493D,V  | ENSG00000185069 | KRT76           | 20   | 2  | 0  | 0  | 0  | 0  | 0  | 0  | 0  | 2  | 7  | 0  | 5  | 0  | 0  | 1  | 0  | 0  | 0  | 0  | 0  | 0   | 0  | 1  | 0  | 1   | 0  | 0  | 0   | 0  | 0  |    |   |
| ENSP00000330113_ENSP0000 | ENSG00000174953 | DHX36           | 143  | 12 | 9  | 6  | 4  | 5  | 7  | 3  | 0  | 1  | 8  | 1  | 3  | 6  | 0  | 6  | 3  | 1  | 4  | 7  | 10 | 4   | 4  | 4  | 4  | 9   | 4  | 5  | 4   | 6  | 3  |    |   |
| ENSP00000330165          | ENSG00000182899 | RPL35A          | 166  | 9  | 3  | 4  | 4  | 8  | 3  | 7  | 5  | 5  | 3  | 1  | 2  | 9  | 5  | 5  | 7  | 10 | 10 | 4  | 7  | 2   | 10 | 4  | 2  | 7   | 7  | 3  | 6   | 8  | 6  |    |   |
| ENSP00000330188          | ENSG00000111011 | RSRC2           | 55   | 2  | 2  | 1  | 1  | 2  | 3  | 2  | 2  | 2  | 1  | 1  | 1  | 0  | 3  | 1  | 1  | 2  | 2  | 3  | 2  | 1   | 3  | 4  | 4  | 1   | 2  | 2  | 1   | 2  | 2  | 1  |   |
| ENSP00000330311_ENSP0000 | ENSG00000185049 | WHS2C           | 111  | 0  | 2  | 4  | 4  | 4  | 3  | 3  | 2  | 6  | 5  | 3  | 3  | 5  | 1  | 2  | 3  | 6  | 3  | 3  | 4  | 4   | 4  | 5  | 2  | 4   | 5  | 3  | 6   | 7  | 5  |    |   |
| ENSP00000330349_ENSP0000 | ENSG00000183258 | DDX41           | 122  | 4  | 2  | 3  | 8  | 3  | 6  | 5  | 2  | 3  | 8  | 3  | 9  | 6  | 1  | 1  | 5  | 8  | 5  | 3  | 4  | 3   | 6  | 4  | 1  | 2   | 7  | 1  | 4   | 3  | 2  |    |   |
| ENSP00000330361_ENSP0000 | ENSG00000182307 | C8orf33         | 12   | 1  | 0  | 0  | 0  | 0  | 0  | 0  | 0  | 0  | 0  | 0  | 0  | 0  | 0  | 0  | 0  | 1  | 0  | 0  | 0  | 1   | 1  | 0  | 0  | 1   | 1  | 0  | 1   | 3  | 2  |    |   |
| ENSP00000330389          | ENSG00000184924 | C2orf79         | 45   | 1  | 3  | 4  | 2  | 2  | 1  | 1  | 0  | 2  | 1  | 1  | 2  | 1  | 0  | 4  | 0  | 3  | 3  | 3  | 3  | 2   | 1  | 0  | 1  | 0   | 1  | 1  | 1   | 0  | 1  |    |   |
| ENSP00000330393_ENSP0000 | ENSG00000116678 | LEPR            | 11   | 0  | 0  | 2  | 0  | 1  | 1  | 1  | 0  | 0  | 0  | 0  | 0  | 0  | 0  | 0  | 0  | 1  | 0  | 0  | 0  | 0   | 0  | 1  | 0  | 0   | 0  | 1  | 1   | 1  | 0  | 1  |   |
| ENSP00000330408_ENSP0000 | ENSG00000182149 | KIAA0174        | 19   | 4  | 0  | 1  | 1  | 0  | 0  | 0  | 0  | 0  | 0  | 0  | 0  | 0  | 1  | 1  | 0  | 0  | 1  | 2  | 1  | 1   | 0  | 0  | 1  | 1   | 1  | 1  | 0   | 0  | 1  |    |   |
| ENSP00000330432_ENSP0000 | ENSG00000133477 | FAM83F          | 26   | 1  | 0  | 0  | 3  | 3  | 0  | 0  | 1  | 0  | 0  | 1  | 1  | 2  | 2  | 1  | 2  | 1  | 1  | 2  | 0  | 0   | 1  | 1  | 1  | 1   | 0  | 1  | 0   | 0  | 1  | 0  |   |
| ENSP00000330460_ENSP0000 | ENSG00000118197 | DXS9            | 10   | 0  | 0  | 1  | 0  | 1  | 0  | 1  | 0  | 0  | 0  | 0  | 0  | 1  | 0  | 0  | 0  | 1  | 0  | 0  | 0  | 1   | 0  | 0  | 0  | 0   | 0  | 1  | 1   | 1  | 0  |    |   |
| ENSP00000330512_ENSP0000 | ENSG00000153046 | CDYL            | 22   | 1  | 1  | 0  | 1  | 0  | 0  | 4  | 1  | 0  | 0  | 0  | 0  | 0  | 0  | 2  | 1  | 0  | 2  | 0  | 1  | 0   | 0  | 4  | 0  | 1   | 0  | 0  | 1   | 1  | 1  | 0  |   |
| ENSP00000330516_ENSP0000 | ENSG00000182944 | EWSR1           | 212  | 6  | 4  | 7  | 10 | 8  | 5  | 10 | 9  | 9  | 9  | 3  | 5  | 9  | 5  | 4  | 8  | 6  | 6  | 7  | 10 | 7   | 12 | 7  | 7  | 6   | 8  | 5  | 7   | 6  | 7  |    |   |
| ENSP00000330587_G11D,A1  | ENSG00000205358 | MTIH            | 12   | 0  | 0  | 0  | 0  | 0  | 0  | 0  | 0  | 0  | 0  | 0  | 0  | 0  | 0  | 0  | 0  | 2  | 2  | 0  | 0  | 0   | 0  | 0  | 0  | 0   | 0  | 0  | 0   | 1  | 7  |    |   |
| ENSP00000330620_ENSP0000 | ENSG00000183495 | EP400           | 45   | 2  | 2  | 0  | 1  | 0  | 1  | 1  | 0  | 1  | 2  | 0  | 1  | 1  | 2  | 1  | 1  | 2  | 1  | 2  | 4  | 2   | 4  | 4  | 1  | 0   | 4  | 2  | 0   | 2  | 1  |    |   |
| ENSP00000330685_ENSP0000 | ENSG00000123472 | ATPAF1          | 12   | 1  | 0  | 0  | 0  | 0  | 0  | 0  | 0  | 0  | 0  | 0  | 0  | 0  | 1  | 0  | 0  | 2  | 0  | 0  | 0  | 1   | 1  | 0  | 1  | 0   | 0  | 0  | 1   | 1  | 1  |    |   |
| ENSP00000330694          | ENSG00000185115 | NDNL1           | 21   | 0  | 1  | 0  | 1  | 1  | 2  | 1  | 1  | 0  | 0  | 0  | 1  | 0  | 1  | 0  | 1  | 0  | 2  | 0  | 1  | 2   | 0  | 3  | 1  | 0   | 0  | 1  | 0   | 0  | 1  | 0  |   |
| ENSP00000330737          | ENSG00000184752 | NUDFA12         | 29   | 2  | 1  | 1  | 1  | 0  | 1  | 1  | 2  | 1  | 0  | 0  | 1  | 0  | 0  | 1  | 0  | 1  | 0  | 1  | 1  | 0   | 2  | 0  | 1  | 2   | 2  | 2  | 0   | 2  | 3  |    |   |
| ENSP00000330753_ENSP0000 | ENSG00000185658 | BRWD1           | 29   | 1  | 0  | 0  | 0  | 0  | 0  | 1  | 0  | 1  | 2  | 0  | 2  | 1  | 0  | 1  | 2  | 3  | 0  | 2  | 2  | 1   | 1  | 2  | 0  | 0   | 0  | 0  | 2   | 2  | 3  |    |   |
| ENSP00000330787          | ENSG00000183648 | NUDF81          | 52   | 3  | 0  | 0  | 2  | 1  | 1  | 2  | 2  | 1  | 1  | 3  | 2  | 1  | 5  | 1  | 1  | 3  | 1  | 1  | 2  | 2   | 4  | 0  | 2  | 1   | 3  | 1  | 1   | 1  | 3  | 1  |   |
| ENSP00000330813_ENSP0000 | ENSG00000089234 | BRAP            | 29   | 0  | 0  | 1  | 3  | 2  | 2  | 3  | 1  | 1  | 1  | 0  | 1  | 0  | 0  | 0  | 5  | 0  | 0  | 1  | 2  | 0   | 4  | 2  | 1  | 0   | 0  | 1  | 0   | 0  | 1  | 5  |   |
| ENSP00000330836_rs13991: | ENSG00000108010 | GLRX3           | 238  | 14 | 13 | 7  | 9  | 9  | 7  | 7  | 8  | 4  | 10 | 3  | 4  | 10 | 10 | 7  | 6  | 7  | 4  | 8  | 11 | 7   | 5  | 4  | 5  | 13  | 13 | 3  | 14  | 9  | 7  |    |   |
| ENSP00000330918          | ENSG00000184207 | PGP             | 94   | 6  | 4  | 6  | 1  | 2  | 3  | 3  | 2  | 4  | 3  | 0  | 2  | 2  | 2  | 2  | 4  | 2  | 4  | 3  | 2  | 5   | 2  | 1  | 4  | 6   | 3  | 4  | 5   | 3  | 4  |    |   |
| ENSP00000330945_ENSP0000 | ENSG00000184840 | TMED9           | 109  | 5  | 2  | 4  | 1  | 1  | 8  | 4  | 5  | 3  | 4  | 4  | 0  | 1  | 3  | 0  | 1  | 3  | 4  | 6  | 2  | 4   | 4  | 3  | 5  | 7   | 8  | 5  | 5   | 4  | 3  | 1  |   |
| ENSP00000331087_ENSP0000 | ENSG00000184281 | TSSC4           | 29   | 2  | 0  | 1  | 0  | 1  | 1  | 0  | 0  | 1  | 2  | 0  | 0  | 1  | 1  | 1  | 1  | 1  | 1  | 1  | 2  | 1   | 2  | 1  | 1  | 1   | 2  | 0  | 2   | 1  | 1  |    |   |
| ENSP00000331105_ENSP0000 | ENSG00000115970 | TRIM26          | 15   | 0  | 1  | 0  | 0  | 1  | 1  | 2  | 0  | 0  | 1  | 0  | 1  | 0  | 0  | 0  | 0  | 1  | 1  | 0  | 1  | 0   | 0  | 1  | 0  | 1   | 0  | 1  | 0   | 2  | 0  | 1  | 0 |
| ENSP00000331131_ENSP0000 | ENSG00000206499 | THADA           | 35   | 3  | 1  | 0  | 2  | 2  | 1  | 3  | 2  | 0  | 0  | 0  | 0  | 0  | 3  | 1  | 2  | 0  | 0  | 0  | 2  | 2   | 1  | 3  | 1  | 0   | 1  | 3  | 1   | 0  | 1  | 0  |   |
| ENSP00000331201_ENSP0000 | EN              |                 |      |    |    |    |    |    |    |    |    |    |    |    |    |    |    |    |    |    |    |    |    |     |    |    |    |     |    |    |     |    |    |    |   |

|                         |                 |             |      |     |     |     |    |     |    |    |    |    |     |    |    |    |     |     |    |    |    |    |     |    |     |    |    |     |     |     |    |    |    |   |
|-------------------------|-----------------|-------------|------|-----|-----|-----|----|-----|----|----|----|----|-----|----|----|----|-----|-----|----|----|----|----|-----|----|-----|----|----|-----|-----|-----|----|----|----|---|
| ENSP0000033401,ENSP000  | ENSG00000185608 | MRPL40      | 89   | 4   | 3   | 3   | 0  | 1   | 2  | 1  | 2  | 8  | 6   | 2  | 1  | 2  | 3   | 4   | 2  | 4  | 4  | 2  | 2   | 2  | 5   | 3  | 2  | 5   | 3   | 1   | 6  | 2  | 4  |   |
| ENSP0000033504,ENSP000  | ENSG00000135486 | HNRA1L13,HN | 1327 | 47  | 15  | 26  | 64 | 70  | 36 | 66 | 20 | 27 | 74  | 12 | 30 | 42 | 14  | 31  | 51 | 82 | 34 | 59 | 54  | 40 | 81  | 34 | 40 | 59  | 37  | 33  | 67 | 53 | 29 |   |
| ENSP0000033547          | ENSG00000185236 | RAB11B      | 248  | 10  | 4   | 6   | 8  | 15  | 15 | 10 | 7  | 8  | 13  | 2  | 5  | 8  | 2   | 8   | 9  | 8  | 10 | 8  | 10  | 9  | 13  | 4  | 6  | 13  | 9   | 7   | 9  | 5  | 7  |   |
| ENSP0000033551,ENSP000  | ENSG00000147471 | PROSC       | 55   | 2   | 1   | 1   | 1  | 0   | 2  | 0  | 0  | 1  | 4   | 0  | 1  | 2  | 0   | 1   | 3  | 3  | 2  | 0  | 0   | 0  | 1   | 1  | 2  | 5   | 6   | 2   | 8  | 3  | 3  |   |
| ENSP0000033656,ENSP000  | ENSG00000185187 | SIGIRR      | 79   | 2   | 5   | 2   | 1  | 6   | 3  | 4  | 8  | 5  | 3   | 4  | 0  | 2  | 0   | 1   | 2  | 1  | 0  | 2  | 5   | 0  | 0   | 2  | 3  | 1   | 6   | 7   | 4  | 0  | 0  |   |
| ENSP0000033664_r15626;  | ENSG00000060691 | ACA11       | 274  | 14  | 7   | 18  | 2  | 6   | 8  | 5  | 10 | 13 | 11  | 3  | 5  | 10 | 3   | 8   | 10 | 4  | 3  | 1  | 9   | 13 | 17  | 13 | 17 | 17  | 17  | 13  | 5  | 7  | 5  |   |
| ENSP0000033666          | ENSG00000182551 | AD11        | 84   | 3   | 4   | 3   | 2  | 1   | 3  | 1  | 1  | 2  | 2   | 3  | 0  | 2  | 3   | 3   | 1  | 5  | 6  | 9  | 5   | 1  | 1   | 1  | 1  | 4   | 6   | 3   | 2  | 2  | 2  |   |
| ENSP0000033667          | ENSG00000182199 | SHMT2       | 636  | 16  | 16  | 17  | 12 | 21  | 12 | 19 | 14 | 22 | 34  | 23 | 26 | 14 | 17  | 16  | 20 | 20 | 17 | 14 | 18  | 22 | 31  | 29 | 19 | 31  | 22  | 21  | 36 | 33 | 24 |   |
| ENSP0000033799,ENSP000  | ENSG00000174374 | WBSCR16     | 32   | 1   | 2   | 2   | 1  | 3   | 1  | 2  | 0  | 0  | 1   | 0  | 1  | 1  | 0   | 0   | 2  | 2  | 0  | 1  | 2   | 0  | 1   | 1  | 0  | 1   | 2   | 0   | 1  | 2  | 2  |   |
| ENSP0000033806,ENSP000  | ENSG00000182473 | EXOC7       | 79   | 3   | 1   | 4   | 6  | 2   | 2  | 3  | 0  | 2  | 0   | 0  | 2  | 0  | 5   | 2   | 6  | 1  | 2  | 6  | 3   | 1  | 2   | 2  | 1  | 5   | 8   | 1   | 2  | 1  | 4  |   |
| ENSP0000033811,ENSP000  | ENSG00000185627 | PSMD13      | 357  | 21  | 7   | 12  | 9  | 10  | 7  | 10 | 7  | 5  | 15  | 5  | 13 | 9  | 10  | 16  | 11 | 16 | 12 | 12 | 11  | 13 | 6   | 6  | 9  | 21  | 15  | 15  | 25 | 13 | 16 |   |
| ENSP0000033837          | ENSG00000183093 | MRPL12      | 139  | 5   | 6   | 4   | 2  | 6   | 5  | 4  | 5  | 4  | 4   | 6  | 6  | 3  | 2   | 2   | 6  | 9  | 7  | 7  | 4   | 4  | 6   | 3  | 7  | 7   | 6   | 2   | 2  | 4  | 1  |   |
| ENSP0000033873          | ENSG00000185043 | CIB1        | 49   | 0   | 1   | 0   | 0  | 3   | 5  | 3  | 4  | 4  | 0   | 0  | 0  | 2  | 1   | 1   | 4  | 2  | 0  | 2  | 0   | 1  | 0   | 3  | 1  | 2   | 2   | 2   | 0  | 2  | 0  |   |
| ENSP0000033896,ENSP000  | ENSG00000162302 | RP56KA4     | 27   | 2   | 2   | 2   | 1  | 0   | 1  | 1  | 0  | 2  | 3   | 1  | 0  | 1  | 0   | 1   | 0  | 0  | 2  | 0  | 1   | 0  | 4   | 0  | 0  | 0   | 0   | 0   | 2  | 0  | 1  |   |
| ENSP0000033934,ENSP000  | ENSG00000066651 | TRMT11      | 24   | 1   | 0   | 0   | 0  | 0   | 1  | 0  | 1  | 0  | 0   | 0  | 0  | 1  | 0   | 0   | 0  | 2  | 0  | 3  | 3   | 2  | 1   | 0  | 0  | 0   | 2   | 0   | 3  | 2  | 2  |   |
| ENSP0000033948          | ENSG00000187051 | RP519BP1    | 55   | 0   | 1   | 0   | 0  | 3   | 2  | 0  | 1  | 3  | 0   | 4  | 1  | 2  | 1   | 1   | 2  | 2  | 4  | 2  | 4   | 3  | 1   | 2  | 2  | 5   | 1   | 2   | 0  | 1  | 2  | 3 |
| ENSP0000033950,ENSP000  | ENSG00000186031 | FMN1        | 11   | 0   | 0   | 0   | 4  | 1   | 2  | 0  | 0  | 0  | 0   | 0  | 0  | 0  | 0   | 1   | 0  | 0  | 0  | 0  | 0   | 0  | 1   | 0  | 1  | 0   | 0   | 0   | 0  | 0  | 0  |   |
| ENSP0000034008          | ENSG00000197702 | PARVA       | 83   | 3   | 2   | 4   | 0  | 2   | 3  | 2  | 2  | 1  | 4   | 4  | 1  | 3  | 5   | 2   | 4  | 5  | 0  | 4  | 4   | 3  | 3   | 2  | 2  | 1   | 6   | 5   | 0  | 1  | 3  | 2 |
| ENSP0000034037,ENSP000  | ENSG00000161671 | C19orf63    | 26   | 2   | 1   | 1   | 1  | 1   | 1  | 1  | 0  | 0  | 0   | 0  | 0  | 2  | 2   | 0   | 2  | 0  | 0  | 1  | 1   | 2  | 1   | 1  | 1  | 0   | 0   | 1   | 1  | 0  | 2  | 1 |
| ENSP0000034040_R46Q     | ENSG00000187257 | RSB1N1      | 10   | 0   | 0   | 0   | 0  | 0   | 0  | 0  | 0  | 1  | 0   | 1  | 0  | 2  | 2   | 0   | 0  | 1  | 0  | 1  | 0   | 0  | 0   | 0  | 0  | 0   | 1   | 1   | 0  | 0  | 0  | 0 |
| ENSP0000034061,ENSP000  | ENSG00000094631 | HDAEC       | 39   | 0   | 0   | 2   | 3  | 3   | 2  | 2  | 1  | 0  | 1   | 0  | 0  | 0  | 0   | 1   | 0  | 2  | 0  | 3  | 4   | 3  | 3   | 0  | 0  | 1   | 1   | 3   | 4  | 0  | 0  | 0 |
| ENSP0000034156_D1867N   | ENSG00000115306 | SPTBN1      | 2825 | 160 | 119 | 108 | 83 | 112 | 96 | 79 | 71 | 70 | 117 | 70 | 76 | 87 | 103 | 129 | 32 | 50 | 50 | 81 | 112 | 81 | 115 | 93 | 90 | 208 | 178 | 112 | 40 | 53 | 50 |   |
| ENSP0000034157,ENSP000  | ENSG00000133612 | AGAP3       | 14   | 0   | 0   | 0   | 0  | 1   | 0  | 4  | 0  | 2  | 1   | 0  | 2  | 0  | 0   | 0   | 1  | 1  | 0  | 0  | 0   | 0  | 0   | 0  | 0  | 0   | 2   | 0   | 0  | 0  | 0  | 0 |
| ENSP0000034188          | ENSG00000123349 | PPDN5       | 23   | 0   | 0   | 1   | 0  | 0   | 1  | 0  | 0  | 2  | 2   | 0  | 1  | 0  | 0   | 1   | 2  | 0  | 4  | 1  | 0   | 3  | 0   | 0  | 0  | 0   | 1   | 2   | 0  | 2  | 0  | 0 |
| ENSP0000034229          | ENSG00000111731 | KIAA0528    | 61   | 1   | 2   | 1   | 5  | 1   | 1  | 3  | 0  | 0  | 3   | 2  | 3  | 5  | 2   | 1   | 2  | 1  | 0  | 6  | 3   | 2  | 2   | 2  | 1  | 4   | 1   | 2   | 2  | 1  | 2  | 0 |
| ENSP0000034234,ENSP000  | ENSG00000186522 | SEPT10      | 62   | 2   | 2   | 1   | 3  | 2   | 1  | 7  | 3  | 5  | 1   | 2  | 2  | 3  | 2   | 1   | 2  | 2  | 2  | 1  | 3   | 1  | 3   | 2  | 0  | 1   | 1   | 2   | 1  | 2  | 2  | 2 |
| ENSP0000034280,ENSP000  | ENSG00000138162 | TACC2       | 12   | 1   | 0   | 0   | 1  | 2   | 1  | 0  | 0  | 0  | 0   | 1  | 1  | 0  | 0   | 0   | 0  | 0  | 0  | 0  | 0   | 0  | 2   | 0  | 1  | 0   | 0   | 1   | 1  | 0  | 0  | 0 |
| ENSP0000034304          | ENSG00000186076 | PGAM4       | 60   | 3   | 1   | 4   | 0  | 0   | 0  | 4  | 1  | 0  | 4   | 2  | 0  | 0  | 2   | 0   | 2  | 2  | 0  | 5  | 1   | 1  | 4   | 0  | 0  | 2   | 2   | 4   | 4  | 5  | 3  | 4 |
| ENSP0000034308,ENSP000  | ENSG00000176438 | C14orf49    | 55   | 1   | 0   | 1   | 0  | 0   | 0  | 0  | 0  | 0  | 0   | 22 | 7  | 11 | 0   | 0   | 0  | 2  | 0  | 0  | 0   | 1  | 0   | 7  | 2  | 1   | 0   | 0   | 0  | 0  | 0  | 0 |
| ENSP0000034372,ENSP000  | ENSG00000175662 | TOM1L2      | 40   | 0   | 2   | 1   | 2  | 4   | 2  | 2  | 0  | 0  | 0   | 0  | 1  | 2  | 2   | 2   | 1  | 1  | 2  | 0  | 2   | 3  | 1   | 1  | 1  | 1   | 0   | 4   | 0  | 0  | 2  | 1 |
| ENSP0000034373          | ENSG00000186432 | KPN4A       | 240  | 10  | 8   | 9   | 4  | 6   | 3  | 7  | 6  | 9  | 13  | 3  | 7  | 7  | 7   | 9   | 5  | 8  | 7  | 11 | 12  | 12 | 7   | 6  | 9  | 13  | 8   | 9   | 11 | 5  | 9  |   |
| ENSP0000034382,ENSP000  | ENSG00000152413 | HOMER1      | 17   | 0   | 1   | 0   | 1  | 0   | 0  | 1  | 0  | 1  | 2   | 0  | 0  | 1  | 0   | 1   | 0  | 1  | 1  | 2  | 2   | 0  | 1   | 0  | 0  | 0   | 0   | 0   | 1  | 0  | 1  | 0 |
| ENSP0000034409,ENSP000  | ENSG00000110938 | GMPR2       | 40   | 2   | 1   | 0   | 2  | 2   | 1  | 0  | 1  | 2  | 0   | 2  | 0  | 1  | 0   | 0   | 1  | 2  | 1  | 0  | 4   | 1  | 2   | 2  | 0  | 1   | 4   | 1   | 0  | 5  | 2  | 0 |
| ENSP0000034424,ENSP000  | ENSG00000082196 | AMACR,C1QT7 | 37   | 6   | 6   | 5   | 4  | 4   | 5  | 0  | 0  | 0  | 0   | 0  | 0  | 1  | 0   | 1   | 0  | 1  | 0  | 1  | 0   | 0  | 0   | 0  | 0  | 0   | 1   | 1   | 1  | 0  | 0  | 0 |
| ENSP0000034451_E176Q,r  | ENSG00000184470 | TNKR02      | 24   | 0   | 2   | 0   | 1  | 0   | 2  | 3  | 1  | 1  | 2   | 0  | 0  | 0  | 0   | 1   | 0  | 0  | 0  | 0  | 1   | 0  | 3   | 0  | 1  | 1   | 1   | 0   | 1  | 2  | 1  | 0 |
| ENSP0000034499,ENSP000  | ENSG00000119314 | ROD1        | 57   | 1   | 3   | 2   | 0  | 2   | 1  | 2  | 0  | 2  | 1   | 1  | 1  | 1  | 3   | 2   | 2  | 1  | 3  | 2  | 4   | 3  | 3   | 4  | 4  | 2   | 1   | 1   | 2  | 1  | 2  | 0 |
| ENSP0000034538,ENSP000  | ENSG00000153914 | SFRS12      | 60   | 3   | 1   | 4   | 2  | 1   | 2  | 1  | 1  | 1  | 2   | 4  | 1  | 1  | 2   | 1   | 2  | 1  | 3  | 1  | 4   | 2  | 4   | 3  | 5  | 2   | 1   | 0   | 0  | 2  | 3  | 0 |
| ENSP0000034553,ENSP000  | ENSG00000100023 | PIPL2       | 35   | 3   | 3   | 1   | 3  | 2   | 1  | 1  | 1  | 0  | 0   | 0  | 0  | 0  | 2   | 1   | 1  | 1  | 0  | 2  | 1   | 1  | 1   | 3  | 0  | 1   | 3   | 1   | 0  | 1  | 0  | 1 |
| ENSP0000034612_rs42942; | ENSG00000100029 | PES1        | 166  | 8   | 7   | 4   | 4  | 3   | 6  | 3  | 3  | 2  | 5   | 10 | 4  | 5  | 4   | 9   | 7  | 2  | 6  | 7  | 6   | 10 | 5   | 7  | 9  | 4   | 6   | 2   | 5  | 6  | 6  | 5 |
| ENSP0000034624          | ENSG00000140416 | TPM1        | 364  | 15  | 24  | 10  | 14 | 18  | 7  | 18 | 10 | 8  | 6   | 6  | 5  | 15 | 28  | 14  | 9  | 10 | 6  | 9  | 17  | 7  | 13  | 19 | 9  | 14  | 18  | 10  | 11 | 7  | 7  | 0 |
| ENSP0000034642,ENSP000  | ENSG00000165650 | PZD28       | 29   | 0   | 0   | 0   | 0  | 0   | 0  | 5  | 3  | 3  | 0   | 0  | 0  | 0  | 0   | 1   | 1  | 0  | 0  | 2  | 2   | 1  | 2   | 2  | 2  | 1   | 1   | 1   | 0  | 0  | 0  | 1 |
| ENSP0000034660,ENSP000  | ENSG00000186687 | LYRM7       | 51   | 1   | 1   | 1   | 2  | 2   | 1  | 2  | 1  | 0  | 2   | 1  | 2  | 3  | 4   | 2   | 1  | 2  | 1  | 1  | 3   | 1  | 2   | 2  | 2  | 2   | 2   | 1   | 3  | 2  | 1  | 0 |
| ENSP0000034675,ENSP000  | ENSG00000186871 | ERC6L       | 81   | 2   | 0   | 3   | 3  | 6   | 3  | 3  | 3  | 2  | 1   | 1  | 1  | 1  | 2   | 3   | 2  | 3  | 4  | 3  | 4   | 3  | 0   | 0  | 0  | 0   | 5   | 6   | 3  | 5  | 5  | 4 |
| ENSP0000034724,ENSP000  | ENSG00000126858 | RHOT1       | 25   | 2   | 0   | 1   | 0  | 2   | 1  | 0  | 1  | 2  | 0   | 0  | 0  | 2  | 0   | 0   | 1  | 1  | 0  | 1  | 0   | 2  | 2   | 2  | 0  | 1   | 2   | 1   | 0  | 0  | 1  | 0 |
| ENSP0000034735          | ENSG00000151292 | C5N1K1G3    | 28   | 1   | 0   | 0   | 2  | 2   | 1  | 3  | 1  | 0  | 0   | 0  | 0  | 1  | 2   | 0   | 0  | 1  | 1  | 1  | 2   | 1  | 2   | 1  | 0  | 0   | 0   | 2   | 2  | 0  | 2  | 0 |
| ENSP0000034738          | ENSG00000180957 | PTPNB8      | 211  | 13  | 3   | 7   | 11 | 6   | 5  | 9  | 4  | 6  | 4   | 0  | 2  | 5  | 4   | 6   | 5  | 12 | 9  | 15 | 11  | 8  | 9   | 2  | 3  | 10  | 9   | 4   | 7  | 10 | 12 | 0 |
| ENSP0000034754,ENSP000  | ENSG00000187079 | TEAD1       | 39   | 3   | 1   | 2   | 2  | 1   | 0  | 2  | 2  | 1  | 0   | 1  | 3  | 1  | 0   | 2   | 0  | 2  | 2  | 1  | 1   | 3  | 2   | 0  | 1  | 0   | 1   | 1   | 0  | 1  | 3  | 0 |
| ENSP0000034808,ENSP000  | ENSG00000156256 | USP16       | 23   | 0   | 0   | 1   | 2  | 0   | 1  | 1  | 0  | 1  | 0   | 1  | 0  | 0  | 0   | 0   | 1  | 1  | 1  | 2  | 1   | 0  | 1   | 1  | 2  | 1   | 0   | 0   | 0  | 1  | 1  | 3 |
| ENSP0000034868,ENSP000  | ENSG00000186908 | ZDHHC17     | 11   | 0   | 0   | 1   | 1  | 1   | 0  | 0  | 0  | 1  | 0   | 0  | 0  | 0  | 0   | 0   | 0  | 1  | 0  | 2  | 0   | 0  | 1   | 0  | 0  | 1   | 0   | 0   | 1  | 0  | 0  | 0 |
| ENSP0000034960,ENSP000  | ENSG00000187118 | PKM2        | 25   | 2   | 0   | 0   | 1  | 1   | 0  | 1  | 1  | 0  | 2   | 2  | 1  | 1  | 1   | 0   | 0  | 0  | 1  | 1  | 1   | 0  | 1   | 1  | 0  | 2   | 0   | 1   | 0  | 2  | 1  | 1 |
| ENSP0000034983          | ENSG0           |             |      |     |     |     |    |     |    |    |    |    |     |    |    |    |     |     |    |    |    |    |     |    |     |    |    |     |     |     |    |    |    |   |

|                                            |                  |      |    |    |    |    |    |    |    |    |    |    |    |    |    |    |    |    |    |    |    |    |    |    |    |    |    |    |    |    |    |    |   |
|--------------------------------------------|------------------|------|----|----|----|----|----|----|----|----|----|----|----|----|----|----|----|----|----|----|----|----|----|----|----|----|----|----|----|----|----|----|---|
| ENSP00000337053,ENSP00000000071537         | SEL1L            | 56   | 3  | 1  | 2  | 4  | 2  | 4  | 3  | 4  | 2  | 2  | 0  | 1  | 0  | 0  | 0  | 1  | 5  | 1  | 0  | 0  | 5  | 1  | 1  | 4  | 2  | 3  | 1  | 1  | 3  |    |   |
| ENSP00000337125,ENSP000000000100796        | SMK1             | 133  | 4  | 4  | 3  | 6  | 4  | 5  | 5  | 2  | 8  | 1  | 5  | 6  | 6  | 1  | 5  | 1  | 6  | 5  | 4  | 3  | 4  | 8  | 5  | 4  | 6  | 4  | 5  | 4  | 8  | 5  |   |
| ENSP00000337127,ENSP000000000112096        | SOD2             | 45   | 0  | 0  | 1  | 0  | 1  | 0  | 4  | 1  | 0  | 0  | 0  | 0  | 0  | 0  | 2  | 2  | 0  | 1  | 2  | 1  | 1  | 5  | 1  | 5  | 6  | 4  | 2  | 3  | 0  | 1  |   |
| ENSP00000337159_rs25446,ENSP00000000039319 | ZFYVE16          | 36   | 1  | 0  | 0  | 1  | 0  | 1  | 1  | 0  | 0  | 0  | 0  | 0  | 0  | 0  | 4  | 0  | 3  | 1  | 2  | 2  | 3  | 2  | 4  | 0  | 0  | 1  | 1  | 2  | 1  | 4  |   |
| ENSP00000337194,ENSP000000000112739        | PRPF48           | 237  | 5  | 5  | 5  | 6  | 4  | 11 | 4  | 3  | 6  | 16 | 4  | 9  | 5  | 1  | 5  | 10 | 13 | 11 | 7  | 7  | 9  | 10 | 8  | 11 | 12 | 7  | 9  | 16 | 11 | 7  |   |
| ENSP00000337196,ENSP000000000087263        | OGFO01           | 57   | 5  | 1  | 2  | 1  | 0  | 1  | 2  | 0  | 0  | 1  | 0  | 0  | 4  | 2  | 2  | 2  | 1  | 2  | 3  | 4  | 2  | 3  | 0  | 4  | 2  | 1  | 0  | 7  | 2  | 3  |   |
| ENSP00000337261,ENSP000000000076928        | ARHGEF1          | 191  | 1  | 4  | 3  | 6  | 4  | 7  | 11 | 13 | 14 | 4  | 1  | 3  | 3  | 5  | 2  | 11 | 6  | 8  | 8  | 4  | 4  | 6  | 3  | 5  | 5  | 11 | 5  | 11 | 13 | 10 |   |
| ENSP00000337265,ENSP000000000117859        | OSBPL9           | 14   | 1  | 0  | 2  | 0  | 0  | 1  | 0  | 0  | 0  | 0  | 0  | 0  | 0  | 0  | 1  | 0  | 0  | 2  | 2  | 2  | 2  | 2  | 1  | 0  | 0  | 0  | 0  | 0  | 0  | 0  |   |
| ENSP00000337313,ENSP000000000033030        | ZCCCH8           | 102  | 4  | 1  | 2  | 5  | 2  | 2  | 3  | 5  | 3  | 5  | 2  | 1  | 2  | 1  | 3  | 2  | 1  | 2  | 4  | 5  | 9  | 14 | 6  | 9  | 3  | 0  | 3  | 2  | 0  | 1  |   |
| ENSP00000337398                            | UNG              | 18   | 1  | 1  | 1  | 1  | 1  | 1  | 1  | 0  | 1  | 0  | 0  | 0  | 0  | 0  | 1  | 0  | 1  | 1  | 1  | 0  | 1  | 0  | 1  | 1  | 1  | 0  | 0  | 0  | 1  | 1  |   |
| ENSP00000337443                            | NXN              | 11   | 0  | 0  | 0  | 0  | 0  | 0  | 0  | 0  | 0  | 0  | 0  | 1  | 1  | 0  | 1  | 2  | 1  | 3  | 1  | 0  | 1  | 0  | 0  | 0  | 0  | 0  | 0  | 0  | 0  | 0  |   |
| ENSP00000337445,ENSP000000000006744        | ELAC2            | 114  | 2  | 1  | 4  | 1  | 2  | 3  | 1  | 0  | 2  | 6  | 0  | 1  | 4  | 1  | 6  | 4  | 4  | 6  | 5  | 5  | 5  | 6  | 1  | 3  | 10 | 4  | 5  | 10 | 4  | 8  |   |
| ENSP00000337448                            | PPP2R1A          | 80   | 2  | 2  | 3  | 4  | 5  | 4  | 3  | 1  | 1  | 4  | 0  | 1  | 4  | 0  | 2  | 2  | 1  | 2  | 5  | 3  | 4  | 2  | 0  | 1  | 5  | 2  | 2  | 6  | 3  | 6  |   |
| ENSP00000337476,ENSP000000000141425        | RPRD1A           | 64   | 0  | 0  | 0  | 1  | 1  | 2  | 3  | 0  | 0  | 0  | 2  | 1  | 4  | 2  | 3  | 5  | 6  | 3  | 2  | 3  | 3  | 0  | 2  | 1  | 1  | 5  | 2  | 4  | 4  | 4  |   |
| ENSP00000337500                            | PCGF5            | 10   | 0  | 0  | 0  | 0  | 1  | 0  | 0  | 1  | 0  | 0  | 1  | 0  | 0  | 0  | 1  | 0  | 2  | 0  | 1  | 1  | 0  | 0  | 1  | 0  | 0  | 0  | 0  | 0  | 1  | 0  |   |
| ENSP00000337513,ENSP00000000013523         | SRA1             | 15   | 1  | 1  | 0  | 0  | 0  | 1  | 0  | 0  | 0  | 1  | 0  | 0  | 0  | 0  | 1  | 0  | 0  | 1  | 0  | 2  | 0  | 0  | 0  | 1  | 1  | 2  | 0  | 1  | 1  | 0  |   |
| ENSP00000337518                            | FTSJ3            | 337  | 19 | 12 | 9  | 5  | 9  | 7  | 8  | 7  | 6  | 19 | 10 | 10 | 11 | 11 | 12 | 12 | 14 | 12 | 8  | 14 | 9  | 17 | 15 | 13 | 11 | 9  | 8  | 16 | 13 | 11 |   |
| ENSP00000337518_rs27272,ENSP0000000108592  | FTSJ3            | 321  | 17 | 12 | 8  | 6  | 9  | 7  | 7  | 7  | 6  | 15 | 10 | 9  | 10 | 11 | 12 | 10 | 14 | 11 | 8  | 14 | 9  | 16 | 15 | 11 | 10 | 8  | 7  | 17 | 13 | 12 |   |
| ENSP00000337541_M248T,ENSP0000000172661    | FAM21D,FAM:      | 58   | 3  | 3  | 0  | 2  | 4  | 1  | 0  | 2  | 3  | 5  | 1  | 1  | 1  | 4  | 1  | 3  | 1  | 1  | 3  | 3  | 2  | 1  | 0  | 1  | 3  | 2  | 0  | 3  | 1  | 3  |   |
| ENSP00000337623                            | RNASEH2B         | 15   | 2  | 1  | 1  | 0  | 2  | 1  | 0  | 0  | 0  | 2  | 1  | 1  | 0  | 0  | 0  | 0  | 0  | 0  | 0  | 0  | 0  | 1  | 2  | 1  | 0  | 0  | 0  | 0  | 1  | 0  |   |
| ENSP00000337632                            | ENSG000000205233 | 126  | 6  | 5  | 4  | 3  | 8  | 5  | 2  | 4  | 1  | 2  | 5  | 5  | 2  | 7  | 3  | 3  | 5  | 3  | 7  | 7  | 6  | 3  | 7  | 2  | 5  | 2  | 1  | 4  | 7  | 2  |   |
| ENSP00000337641                            | ENSG00000154001  | 36   | 1  | 1  | 1  | 2  | 1  | 1  | 1  | 1  | 2  | 0  | 0  | 0  | 2  | 1  | 3  | 0  | 1  | 0  | 1  | 1  | 3  | 0  | 1  | 2  | 0  | 3  | 3  | 0  | 1  | 3  |   |
| ENSP00000337669,ENSP000000000070831        | CD42P2,CDG:      | 128  | 9  | 3  | 4  | 0  | 1  | 4  | 4  | 1  | 6  | 9  | 0  | 3  | 2  | 1  | 5  | 5  | 3  | 9  | 2  | 1  | 5  | 4  | 2  | 5  | 13 | 3  | 6  | 11 | 1  | 6  |   |
| ENSP00000337679,ENSP000000000135250        | SRPK2            | 58   | 1  | 3  | 2  | 1  | 0  | 1  | 2  | 0  | 0  | 2  | 5  | 0  | 2  | 5  | 1  | 2  | 1  | 3  | 3  | 3  | 5  | 2  | 2  | 1  | 3  | 2  | 2  | 0  | 2  | 2  |   |
| ENSP00000337688                            | SEC62            | 83   | 6  | 3  | 2  | 3  | 2  | 2  | 3  | 4  | 4  | 3  | 2  | 2  | 3  | 2  | 3  | 1  | 2  | 4  | 5  | 4  | 4  | 3  | 2  | 2  | 2  | 2  | 2  | 1  | 3  | 2  |   |
| ENSP00000337701,ENSP000000000177666        | PNPLA2           | 17   | 0  | 0  | 0  | 0  | 0  | 0  | 1  | 2  | 1  | 0  | 0  | 0  | 0  | 1  | 2  | 2  | 0  | 0  | 1  | 2  | 0  | 0  | 0  | 0  | 1  | 0  | 0  | 1  | 1  | 2  |   |
| ENSP00000337736,ENSP000000000121057        | AKA1             | 100  | 4  | 4  | 2  | 3  | 1  | 2  | 5  | 1  | 3  | 7  | 4  | 1  | 0  | 4  | 0  | 1  | 0  | 0  | 2  | 3  | 0  | 0  | 8  | 10 | 15 | 4  | 4  | 4  | 3  | 2  | 3 |
| ENSP00000337773,ENSP000000000124588        | NQO2             | 43   | 1  | 1  | 1  | 1  | 2  | 1  | 2  | 1  | 0  | 0  | 0  | 0  | 0  | 1  | 1  | 0  | 3  | 1  | 2  | 1  | 4  | 2  | 1  | 2  | 0  | 1  | 0  | 7  | 4  | 3  |   |
| ENSP00000337838                            | RTN4             | 100  | 7  | 1  | 5  | 1  | 1  | 4  | 3  | 1  | 3  | 7  | 1  | 3  | 0  | 1  | 7  | 3  | 2  | 6  | 0  | 1  | 5  | 6  | 1  | 3  | 6  | 2  | 4  | 6  | 4  | 6  |   |
| ENSP00000337902,ENSP000000000070371        | CLTCL1           | 449  | 23 | 13 | 16 | 13 | 18 | 16 | 6  | 11 | 16 | 18 | 3  | 11 | 11 | 8  | 16 | 14 | 18 | 12 | 17 | 17 | 19 | 16 | 11 | 13 | 23 | 17 | 19 | 20 | 14 | 20 |   |
| ENSP00000337907,ENSP000000000150054        | MPR2             | 37   | 4  | 1  | 2  | 1  | 1  | 0  | 1  | 1  | 1  | 1  | 1  | 1  | 2  | 0  | 1  | 0  | 3  | 6  | 1  | 1  | 2  | 1  | 1  | 1  | 1  | 2  | 0  | 0  | 0  | 0  |   |
| ENSP00000337907_rs29972,ENSG00000150054    | MNP7             | 37   | 4  | 1  | 3  | 1  | 1  | 0  | 1  | 1  | 1  | 1  | 1  | 1  | 0  | 0  | 1  | 0  | 3  | 6  | 1  | 1  | 2  | 1  | 1  | 1  | 1  | 1  | 2  | 0  | 0  | 0  |   |
| ENSP00000338019,ENSP000000000135924        | ADAIJ2           | 22   | 3  | 2  | 1  | 0  | 0  | 0  | 1  | 1  | 0  | 2  | 0  | 1  | 0  | 0  | 0  | 0  | 0  | 1  | 0  | 2  | 0  | 2  | 1  | 0  | 1  | 0  | 0  | 2  | 0  | 2  |   |
| ENSP00000338030_M268L,ENSG00000080490      | STAR7            | 10   | 1  | 1  | 0  | 1  | 0  | 1  | 1  | 0  | 0  | 1  | 0  | 0  | 0  | 1  | 0  | 0  | 0  | 0  | 0  | 0  | 1  | 0  | 0  | 0  | 1  | 1  | 0  | 0  | 0  | 0  |   |
| ENSP00000338034,ENSP000000000176422        | SPRYD4           | 72   | 2  | 1  | 2  | 2  | 2  | 3  | 2  | 1  | 1  | 2  | 0  | 2  | 1  | 1  | 2  | 0  | 2  | 1  | 5  | 5  | 2  | 3  | 1  | 2  | 9  | 3  | 2  | 6  | 3  | 4  |   |
| ENSP00000338141,ENSP000000000114209        | PDCD10           | 142  | 8  | 5  | 5  | 3  | 7  | 6  | 5  | 3  | 8  | 6  | 0  | 3  | 4  | 3  | 4  | 4  | 5  | 3  | 8  | 4  | 7  | 4  | 2  | 4  | 6  | 4  | 5  | 8  | 4  | 4  |   |
| ENSP00000338160,ENSP000000000096060        | FKBP5            | 189  | 6  | 2  | 3  | 4  | 3  | 5  | 10 | 8  | 7  | 8  | 4  | 3  | 5  | 3  | 6  | 8  | 10 | 13 | 5  | 10 | 9  | 4  | 4  | 2  | 9  | 5  | 7  | 14 | 5  | 7  |   |
| ENSP00000338173,ENSP000000000055917        | PUM2             | 53   | 2  | 1  | 1  | 3  | 2  | 0  | 2  | 0  | 1  | 1  | 0  | 0  | 0  | 2  | 2  | 1  | 3  | 5  | 6  | 2  | 1  | 2  | 0  | 0  | 1  | 1  | 2  | 4  | 5  | 1  |   |
| ENSP00000338185                            | PLCB1            | 10   | 6  | 0  | 0  | 1  | 0  | 1  | 0  | 1  | 0  | 0  | 0  | 0  | 0  | 0  | 0  | 0  | 0  | 0  | 0  | 0  | 0  | 0  | 0  | 0  | 0  | 1  | 0  | 0  | 0  | 0  |   |
| ENSP00000338191                            | SNTB2            | 26   | 1  | 3  | 3  | 0  | 0  | 0  | 0  | 1  | 1  | 0  | 1  | 0  | 1  | 3  | 1  | 0  | 1  | 0  | 3  | 1  | 0  | 0  | 2  | 1  | 0  | 0  | 0  | 0  | 1  | 2  |   |
| ENSP00000338200_rs12502,ENSG00000115414    | FN1              | 13   | 4  | 5  | 4  | 0  | 0  | 0  | 0  | 0  | 0  | 0  | 0  | 0  | 0  | 0  | 0  | 0  | 0  | 0  | 0  | 0  | 0  | 0  | 0  | 0  | 0  | 0  | 0  | 0  | 0  | 0  |   |
| ENSP00000338218_rs96749,ENSP00000173821    | RNF213           | 174  | 0  | 1  | 4  | 11 | 4  | 3  | 29 | 14 | 10 | 3  | 1  | 1  | 5  | 1  | 1  | 2  | 0  | 2  | 19 | 16 | 13 | 7  | 1  | 3  | 7  | 9  | 4  | 2  | 1  | 0  |   |
| ENSP00000338235                            | MTDH             | 356  | 6  | 8  | 4  | 11 | 12 | 10 | 8  | 13 | 5  | 15 | 14 | 6  | 7  | 13 | 11 | 9  | 14 | 12 | 12 | 21 | 10 | 14 | 15 | 10 | 12 | 10 | 7  | 23 | 29 | 15 |   |
| ENSP00000338258                            | CDCA4EP4         | 40   | 1  | 2  | 0  | 3  | 4  | 1  | 3  | 2  | 3  | 1  | 0  | 0  | 0  | 2  | 1  | 0  | 3  | 0  | 1  | 3  | 0  | 0  | 0  | 0  | 5  | 4  | 0  | 1  | 0  | 0  |   |
| ENSP00000338323,ENSP000000000104529        | EEF1D            | 480  | 29 | 17 | 14 | 10 | 18 | 11 | 12 | 6  | 14 | 19 | 9  | 8  | 16 | 12 | 15 | 20 | 20 | 14 | 10 | 23 | 14 | 21 | 14 | 10 | 26 | 17 | 17 | 24 | 21 | 19 |   |
| ENSP00000338340,ENSP000000000182247        | UBE2E2           | 41   | 5  | 0  | 0  | 1  | 1  | 0  | 1  | 0  | 0  | 2  | 0  | 1  | 1  | 2  | 1  | 2  | 1  | 1  | 1  | 4  | 1  | 1  | 3  | 0  | 1  | 2  | 1  | 1  | 1  | 1  |   |
| ENSP00000338352                            | NUDT4P1,NUC      | 39   | 1  | 2  | 2  | 1  | 1  | 1  | 2  | 1  | 3  | 1  | 0  | 1  | 2  | 1  | 1  | 1  | 0  | 0  | 1  | 2  | 2  | 1  | 1  | 1  | 2  | 2  | 1  | 2  | 2  | 1  |   |
| ENSP00000338371,ENSP000000000100354        | TRNCG6B          | 21   | 0  | 0  | 0  | 1  | 1  | 1  | 1  | 0  | 0  | 0  | 0  | 0  | 0  | 0  | 1  | 1  | 1  | 2  | 1  | 2  | 3  | 2  | 0  | 0  | 0  | 0  | 0  | 1  | 3  |    |   |
| ENSP00000338387,ENSP000000000159267        | HLCS             | 10   | 0  | 0  | 1  | 0  | 0  | 1  | 0  | 0  | 0  | 1  | 0  | 0  | 1  | 0  | 1  | 0  | 0  | 0  | 0  | 2  | 1  | 1  | 0  | 0  | 0  | 1  | 0  | 0  | 0  | 0  |   |
| ENSP00000338397,ENSP000000000164978        | NUDT2            | 35   | 1  | 1  | 0  | 0  | 3  | 2  | 0  | 0  | 0  | 0  | 0  | 0  | 0  | 1  | 2  | 3  | 1  | 3  | 1  | 1  | 3  | 1  | 0  | 1  | 2  | 2  | 1  | 3  | 1  | 2  |   |
| ENSP00000338413,ENSP000000000130985        | UBA1             | 1428 | 44 | 31 | 31 | 40 | 69 | 50 | 48 | 35 | 48 | 62 | 24 | 32 | 42 | 32 | 32 | 61 | 58 | 45 | 41 | 56 | 56 | 53 | 29 | 38 | 72 | 66 | 49 | 75 | 48 | 61 |   |
| ENSP00000338422,ENSP000000000100284        | TOM3             | 88   | 3  | 3  | 4  | 6  | 6  | 5  | 4  | 2  | 2  | 0  | 1  | 1  | 2  | 0  | 0  | 2  | 5  | 1  | 2  | 3  | 1  | 2  | 1  | 1  | 10 | 9  | 3  | 1  | 5  | 1  |   |
| ENSP00000338461,ENSP000000000100243        | CYBSR3           | 255  | 8  | 2  | 13 | 5  | 6  | 9  | 10 |    |    |    |    |    |    |    |    |    |    |    |    |    |    |    |    |    |    |    |    |    |    |    |   |

|                 |                          |              |      |     |    |     |    |    |    |    |    |     |     |    |     |    |     |     |    |     |     |    |     |     |     |     |     |     |     |     |     |     |     |   |
|-----------------|--------------------------|--------------|------|-----|----|-----|----|----|----|----|----|-----|-----|----|-----|----|-----|-----|----|-----|-----|----|-----|-----|-----|-----|-----|-----|-----|-----|-----|-----|-----|---|
| ENSP00000339495 | ENSG00000188986          | COBRA1       | 118  | 4   | 2  | 2   | 8  | 5  | 2  | 5  | 5  | 4   | 5   | 0  | 3   | 3  | 3   | 5   | 3  | 5   | 3   | 8  | 5   | 2   | 2   | 4   | 4   | 4   | 5   | 3   | 4   | 5   | 5   |   |
| ENSP00000339503 | ENSP00000106268          | NDUT1        | 36   | 3   | 1  | 2   | 0  | 2  | 1  | 0  | 2  | 0   | 1   | 1  | 0   | 0  | 0   | 1   | 1  | 1   | 1   | 2  | 1   | 3   | 1   | 1   | 2   | 0   | 3   | 2   | 1   | 2   |     |   |
| ENSP00000339521 | ENSP00000148484          | RSU1         | 90   | 4   | 4  | 3   | 2  | 4  | 3  | 3  | 3  | 1   | 2   | 1  | 1   | 3  | 3   | 2   | 4  | 4   | 3   | 2  | 2   | 4   | 2   | 4   | 2   | 6   | 3   | 5   | 4   | 2   |     |   |
| ENSP00000339529 | ENSP00000104356          | POP1         | 122  | 2   | 1  | 1   | 4  | 5  | 4  | 4  | 4  | 3   | 0   | 4  | 1   | 2  | 6   | 4   | 2  | 4   | 4   | 9  | 3   | 7   | 9   | 5   | 2   | 5   | 0   | 3   | 14  | 6   |     |   |
| ENSP00000339529 | rs17184:ENSG00000104356  | POP1         | 100  | 2   | 1  | 0   | 3  | 5  | 3  | 3  | 4  | 2   | 0   | 2  | 1   | 2  | 5   | 3   | 2  | 2   | 3   | 2  | 8   | 2   | 7   | 7   | 5   | 2   | 4   | 0   | 3   | 12  | 5   |   |
| ENSP00000339530 | ENSP00000148308          | GTF3C5       | 13   | 0   | 0  | 0   | 2  | 0  | 0  | 0  | 0  | 0   | 1   | 0  | 0   | 0  | 0   | 0   | 1  | 1   | 1   | 0  | 0   | 1   | 1   | 0   | 0   | 0   | 1   | 0   | 1   | 1   |     |   |
| ENSP00000339532 | ENSP00000134077          | THUMP3       | 27   | 3   | 2  | 1   | 1  | 0  | 0  | 0  | 0  | 0   | 0   | 0  | 0   | 2  | 0   | 1   | 2  | 1   | 1   | 1  | 0   | 0   | 2   | 0   | 2   | 1   | 1   | 0   | 2   | 2   |     |   |
| ENSP00000339557 | ENSP00000117788          |              | 18   | 0   | 1  | 1   | 1  | 0  | 1  | 1  | 0  | 0   | 1   | 0  | 0   | 1  | 0   | 2   | 1  | 1   | 0   | 1  | 2   | 1   | 0   | 0   | 0   | 0   | 0   | 1   | 0   | 0   |     |   |
| ENSP00000339566 | ENSG00000187837          | HIST1H1C     | 898  | 20  | 28 | 20  | 25 | 41 | 30 | 28 | 24 | 24  | 32  | 22 | 26  | 72 | 27  | 17  | 42 | 28  | 19  | 31 | 40  | 23  | 32  | 34  | 27  | 31  | 37  | 24  | 41  | 34  | 19  |   |
| ENSP00000339569 | A620T,E:ENSG00000029725  | RABEP1       | 54   | 2   | 0  | 1   | 2  | 3  | 1  | 0  | 1  | 1   | 0   | 1  | 2   | 3  | 2   | 1   | 2  | 2   | 3   | 1  | 2   | 2   | 1   | 3   | 2   | 2   | 0   | 6   | 5   | 2   |     |   |
| ENSP00000339569 | _M628I,E:ENSG00000029725 | RABEP1       | 55   | 2   | 0  | 1   | 2  | 3  | 1  | 0  | 1  | 1   | 1   | 0  | 1   | 2  | 3   | 2   | 2  | 2   | 3   | 1  | 2   | 2   | 1   | 3   | 2   | 2   | 0   | 6   | 4   | 3   |     |   |
| ENSP00000339637 | ENSP00000106009          | C7orf27      | 31   | 1   | 2  | 1   | 0  | 1  | 1  | 0  | 0  | 0   | 1   | 0  | 1   | 0  | 0   | 1   | 2  | 1   | 2   | 1  | 1   | 2   | 1   | 1   | 0   | 2   | 2   | 1   | 2   | 2   | 2   |   |
| ENSP00000339659 | ENSG00000109654          | TRIM2        | 67   | 1   | 0  | 4   | 2  | 1  | 6  | 0  | 0  | 0   | 2   | 0  | 0   | 2  | 0   | 0   | 1  | 0   | 2   | 0  | 0   | 0   | 7   | 2   | 6   | 13  | 9   | 9   | 0   | 0   | 0   |   |
| ENSP00000339712 | ENSP00000099364          | FBXL19       | 17   | 2   | 2  | 0   | 0  | 0  | 0  | 0  | 0  | 1   | 0   | 1  | 1   | 0  | 0   | 1   | 0  | 1   | 1   | 1  | 0   | 1   | 1   | 0   | 0   | 1   | 0   | 0   | 2   | 0   | 0   |   |
| ENSP00000339720 | ENSG00000189043          | NDUFA4       | 59   | 2   | 0  | 2   | 1  | 3  | 2  | 2  | 0  | 1   | 3   | 1  | 3   | 2  | 0   | 1   | 2  | 3   | 1   | 1  | 4   | 2   | 2   | 4   | 2   | 2   | 2   | 4   | 4   | 1   | 2   |   |
| ENSP00000339729 | ENSP00000075618          | FSCN1        | 112  | 10  | 5  | 9   | 4  | 2  | 7  | 4  | 0  | 0   | 3   | 0  | 3   | 2  | 2   | 2   | 7  | 10  | 12  | 3  | 2   | 4   | 2   | 2   | 0   | 0   | 0   | 0   | 8   | 7   | 9   |   |
| ENSP00000339740 | ENSP00000145349          | CAMK2D       | 127  | 6   | 3  | 9   | 5  | 2  | 6  | 4  | 5  | 8   | 2   | 1  | 2   | 3  | 3   | 5   | 8  | 5   | 6   | 2  | 5   | 5   | 4   | 2   | 2   | 9   | 2   | 5   | 4   | 2   | 2   |   |
| ENSP00000339826 | ENSP00000155629          | PIK3AP1      | 33   | 0   | 0  | 1   | 2  | 5  | 1  | 0  | 1  | 1   | 2   | 0  | 0   | 0  | 1   | 0   | 2  | 1   | 2   | 2  | 2   | 1   | 1   | 0   | 1   | 0   | 1   | 2   | 1   | 3   | 0   |   |
| ENSP00000339861 | ENSG00000120533          | ENY2         | 29   | 1   | 0  | 1   | 0  | 0  | 1  | 0  | 0  | 1   | 2   | 0  | 2   | 0  | 0   | 2   | 0  | 3   | 2   | 0  | 0   | 2   | 1   | 1   | 2   | 1   | 2   | 1   | 1   | 2   | 1   |   |
| ENSP00000339881 | ENSP00000164654          | MIQ5         | 31   | 2   | 0  | 0   | 2  | 2  | 0  | 0  | 0  | 0   | 1   | 0  | 0   | 3  | 0   | 1   | 2  | 2   | 0   | 2  | 4   | 1   | 0   | 0   | 0   | 0   | 3   | 1   | 2   | 3   | 0   |   |
| ENSP00000339912 | ENSP00000125848          | FLRT3        | 12   | 4   | 5  | 1   | 0  | 0  | 0  | 0  | 0  | 0   | 0   | 0  | 0   | 0  | 0   | 0   | 0  | 0   | 0   | 0  | 0   | 0   | 0   | 0   | 0   | 1   | 0   | 1   | 0   | 0   | 0   |   |
| ENSP00000339916 | ENSP00000182541          | UMK2         | 20   | 1   | 0  | 2   | 1  | 1  | 1  | 0  | 0  | 1   | 0   | 0  | 0   | 1  | 0   | 1   | 1  | 1   | 1   | 0  | 0   | 1   | 0   | 0   | 0   | 2   | 0   | 1   | 2   | 0   | 2   |   |
| ENSP00000339917 | ENSP00000125760          |              | 46   | 2   | 1  | 1   | 3  | 1  | 1  | 3  | 1  | 0   | 1   | 0  | 2   | 3  | 2   | 2   | 0  | 2   | 2   | 2  | 2   | 2   | 1   | 1   | 1   | 1   | 1   | 1   | 3   | 2   | 2   |   |
| ENSP00000339958 | ENSG00000103222          | NISCH        | 10   | 1   | 1  | 1   | 0  | 0  | 0  | 0  | 0  | 0   | 0   | 0  | 0   | 0  | 1   | 0   | 0  | 0   | 1   | 0  | 0   | 1   | 0   | 1   | 0   | 1   | 0   | 1   | 2   | 0   | 0   |   |
| ENSP00000340019 | ENSP00000144381          | HSPD1P4,HSP1 | 3771 | 115 | 85 | 133 | 35 | 94 | 87 | 73 | 79 | 144 | 250 | 96 | 101 | 85 | 104 | 106 | 95 | 121 | 127 | 74 | 149 | 141 | 170 | 123 | 160 | 208 | 130 | 152 | 267 | 124 | 143 |   |
| ENSP00000340184 | ENSG0000050405           | UIMA1        | 261  | 11  | 5  | 7   | 6  | 3  | 6  | 15 | 14 | 13  | 10  | 8  | 5   | 3  | 6   | 7   | 3  | 7   | 11  | 3  | 6   | 6   | 26  | 23  | 14  | 14  | 9   | 0   | 1   | 2   |     |   |
| ENSP00000340201 | ENSP00000130810          | PPAN         | 71   | 2   | 4  | 2   | 4  | 4  | 1  | 1  | 1  | 2   | 1   | 3  | 2   | 1  | 3   | 3   | 1  | 3   | 1   | 2  | 4   | 2   | 4   | 3   | 2   | 2   | 3   | 1   | 4   | 3   | 2   |   |
| ENSP00000340210 | ENSP00000080503          | CD59         | 27   | 0   | 2  | 2   | 0  | 0  | 0  | 0  | 3  | 1   | 2   | 1  | 2   | 0  | 1   | 1   | 2  | 0   | 1   | 2  | 0   | 2   | 0   | 1   | 0   | 0   | 0   | 1   | 2   | 0   |     |   |
| ENSP00000340211 | ENSP00000172725          | CORO18       | 339  | 18  | 18 | 12  | 10 | 16 | 8  | 10 | 14 | 9   | 8   | 9  | 7   | 9  | 14  | 10  | 7  | 12  | 9   | 9  | 19  | 8   | 13  | 13  | 9   | 12  | 18  | 10  | 7   | 13  | 8   |   |
| ENSP00000340237 | ENSP00000130147          | SH3BP1       | 38   | 0   | 0  | 1   | 1  | 4  | 0  | 0  | 0  | 2   | 1   | 1  | 3   | 5  | 3   | 1   | 0  | 1   | 3   | 5  | 3   | 0   | 0   | 0   | 1   | 0   | 2   | 0   | 0   | 0   | 0   |   |
| ENSP00000340260 | ENSP00000162390          | ACTO11       | 13   | 0   | 0  | 0   | 2  | 1  | 0  | 1  | 0  | 0   | 0   | 0  | 0   | 0  | 0   | 0   | 0  | 1   | 1   | 0  | 0   | 0   | 0   | 0   | 1   | 3   | 1   | 2   | 0   | 0   | 0   |   |
| ENSP00000340271 | ENSP00000165632          | TAF3         | 10   | 0   | 0  | 2   | 0  | 0  | 0  | 0  | 0  | 0   | 1   | 0  | 1   | 0  | 0   | 1   | 0  | 0   | 2   | 0  | 0   | 1   | 0   | 0   | 0   | 0   | 0   | 0   | 2   | 0   | 0   |   |
| ENSP00000340274 | ENSP00000123728          | RAP2C        | 54   | 3   | 1  | 2   | 1  | 1  | 0  | 2  | 3  | 3   | 3   | 0  | 2   | 0  | 1   | 2   | 3  | 2   | 1   | 2  | 0   | 0   | 3   | 0   | 2   | 3   | 5   | 2   | 2   | 2   | 3   |   |
| ENSP00000340278 | ENSP00000116288          | PARK7        | 354  | 15  | 19 | 6   | 6  | 22 | 10 | 7  | 4  | 6   | 17  | 13 | 10  | 9  | 6   | 6   | 10 | 20  | 12  | 9  | 19  | 9   | 12  | 9   | 11  | 15  | 14  | 6   | 26  | 16  | 10  |   |
| ENSP00000340281 | ENSG00000110321          | E1F4G2       | 401  | 15  | 16 | 13  | 10 | 8  | 6  | 11 | 14 | 10  | 23  | 10 | 9   | 14 | 11  | 15  | 14 | 21  | 17  | 15 | 16  | 17  | 12  | 8   | 6   | 22  | 14  | 9   | 16  | 17  | 12  |   |
| ENSP00000340281 | E174D:ENSG00000110321    | E1F4G2       | 376  | 13  | 14 | 12  | 9  | 8  | 6  | 10 | 13 | 9   | 22  | 8  | 8   | 14 | 12  | 16  | 14 | 20  | 16  | 15 | 16  | 18  | 11  | 6   | 5   | 20  | 13  | 8   | 14  | 15  | 11  |   |
| ENSP00000340305 | ENSP00000124208          | TMEM189_UBI  | 201  | 14  | 13 | 16  | 5  | 10 | 7  | 4  | 4  | 5   | 6   | 2  | 3   | 4  | 9   | 5   | 6  | 8   | 6   | 6  | 7   | 6   | 5   | 4   | 3   | 10  | 4   | 7   | 9   | 8   | 5   |   |
| ENSP00000340312 | ENSP00000100106          | TRIOBP       | 101  | 2   | 3  | 2   | 3  | 1  | 3  | 6  | 3  | 4   | 1   | 0  | 1   | 2  | 2   | 3   | 7  | 12  | 8   | 3  | 3   | 5   | 7   | 2   | 3   | 2   | 4   | 3   | 2   | 2   | 2   |   |
| ENSP00000340329 | ENSP00000135387          | CAPRN1       | 239  | 9   | 8  | 8   | 7  | 11 | 4  | 12 | 10 | 6   | 8   | 5  | 4   | 10 | 14  | 11  | 11 | 9   | 10  | 11 | 13  | 9   | 1   | 0   | 12  | 7   | 4   | 8   | 8   | 9   |     |   |
| ENSP00000340391 | ENSP00000073712          | FERRMT2      | 23   | 7   | 4  | 7   | 0  | 0  | 0  | 0  | 0  | 0   | 1   | 0  | 0   | 0  | 0   | 0   | 0  | 1   | 1   | 0  | 0   | 0   | 1   | 0   | 1   | 0   | 0   | 0   | 0   | 0   | 0   |   |
| ENSP00000340427 | G63D:ENSG0000099219      | ERMP1        | 61   | 3   | 2  | 3   | 7  | 7  | 7  | 8  | 6  | 7   | 0   | 0  | 0   | 0  | 0   | 0   | 2  | 2   | 1   | 1  | 0   | 0   | 0   | 0   | 0   | 0   | 2   | 0   | 0   | 2   | 1   |   |
| ENSP00000340463 | ENSP00000189334          | S100A14      | 123  | 8   | 6  | 3   | 1  | 0  | 1  | 2  | 4  | 1   | 1   | 0  | 0   | 5  | 6   | 5   | 3  | 6   | 5   | 2  | 8   | 3   | 8   | 16  | 6   | 7   | 9   | 7   | 0   | 0   | 0   |   |
| ENSP00000340507 | ENSP00000122779          | TRIM24       | 27   | 2   | 2  | 2   | 0  | 0  | 0  | 3  | 0  | 1   | 3   | 0  | 1   | 1  | 0   | 1   | 0  | 3   | 0   | 3  | 2   | 0   | 0   | 0   | 0   | 0   | 1   | 0   | 0   | 2   | 0   |   |
| ENSP00000340510 | rs20379:ENSG00000118898  | PPL          | 571  | 29  | 20 | 18  | 6  | 2  | 0  | 31 | 40 | 20  | 38  | 27 | 28  | 25 | 30  | 38  | 9  | 24  | 15  | 29 | 50  | 34  | 21  | 17  | 8   | 7   | 3   | 2   | 0   | 0   | 0   |   |
| ENSP00000340510 | rs20756:ENSG00000118898  | PPL          | 546  | 27  | 18 | 17  | 6  | 2  | 0  | 29 | 37 | 19  | 36  | 25 | 27  | 25 | 29  | 38  | 8  | 23  | 14  | 29 | 49  | 34  | 19  | 16  | 7   | 7   | 3   | 2   | 0   | 0   | 0   |   |
| ENSP00000340587 | ENSP00000154305          | MI3A         | 284  | 11  | 9  | 8   | 7  | 12 | 3  | 10 | 13 | 8   | 6   | 6  | 4   | 8  | 9   | 13  | 7  | 8   | 10  | 8  | 18  | 9   | 9   | 12  | 9   | 17  | 15  | 12  | 8   | 6   | 9   |   |
| ENSP00000340591 | ENSP00000148498          | PARD3        | 21   | 4   | 3  | 0   | 0  | 0  | 0  | 0  | 0  | 1   | 0   | 0  | 0   | 1  | 0   | 0   | 0  | 1   | 0   | 0  | 2   | 0   | 1   | 0   | 1   | 0   | 0   | 2   | 2   | 2   | 2   |   |
| ENSP00000340672 | ENSP00000102401          | ARMCX3       | 44   | 2   | 1  | 2   | 3  | 1  | 2  | 0  | 4  | 2   | 3   | 1  | 4   | 1  | 0   | 0   | 0  | 1   | 1   | 3  | 1   | 2   | 0   | 0   | 0   | 1   | 2   | 1   | 2   | 1   | 3   |   |
| ENSP00000340684 | ENSG00000189221          | MAOA         | 58   | 0   | 0  | 0   | 0  | 1  | 3  | 2  | 8  | 0   | 2   | 0  | 0   | 0  | 0   | 0   | 0  | 2   | 2   | 1  | 0   | 1   | 0   | 8   | 3   | 2   | 8   | 10  | 5   | 0   | 0   | 0 |
| ENSP00000340689 | ENSG00000115419          | GLS          | 183  | 11  | 6  | 5   | 2  | 1  | 3  | 0  | 1  | 2   | 14  | 5  | 5   | 5  | 6   | 11  | 2  | 0   | 2   | 5  | 10  | 5   | 8   | 9   | 8   | 12  | 7   | 8   | 10  | 12  | 8   |   |
| ENSP00000340691 | ENSG00000187840          | E1F4EBP1     | 47   | 5   | 1  | 1   | 0  | 3  | 1  | 1  | 0  | 0   | 2   | 0  | 0   | 1  | 1   | 2   | 0  | 1   | 1   | 1  | 3   | 1   | 3   | 0   | 2   | 4   | 0   | 2   | 7   | 2   | 2   |   |
| ENSP00000340691 | A107V:ENSG00000187840    | E1           |      |     |    |     |    |    |    |    |    |     |     |    |     |    |     |     |    |     |     |    |     |     |     |     |     |     |     |     |     |     |     |   |

|                                                         |                                                 |     |    |    |    |    |    |    |    |    |    |    |    |    |    |    |    |    |    |    |    |    |    |    |    |    |    |    |    |    |    |    |   |
|---------------------------------------------------------|-------------------------------------------------|-----|----|----|----|----|----|----|----|----|----|----|----|----|----|----|----|----|----|----|----|----|----|----|----|----|----|----|----|----|----|----|---|
| ENSP00000342056,ENSP00000342056,ENSP00000342056         | CS                                              | 175 | 7  | 6  | 4  | 3  | 11 | 4  | 5  | 8  | 4  | 8  | 4  | 7  | 6  | 1  | 5  | 3  | 4  | 4  | 3  | 5  | 3  | 9  | 9  | 9  | 6  | 9  | 4  | 11 | 7  | 6  |   |
| ENSP00000342070_K209E,rs145600000164733                 | CTSB                                            | 127 | 9  | 4  | 4  | 9  | 11 | 10 | 2  | 0  | 2  | 12 | 5  | 4  | 6  | 3  | 1  | 1  | 5  | 3  | 4  | 5  | 3  | 3  | 2  | 3  | 6  | 3  | 2  | 2  | 2  | 1  |   |
| ENSP00000342098,ENSP00000342098,ENSP00000342098         | SPINT1                                          | 156 | 9  | 10 | 5  | 4  | 7  | 1  | 9  | 12 | 3  | 1  | 2  | 1  | 6  | 6  | 11 | 2  | 7  | 2  | 8  | 14 | 7  | 8  | 4  | 2  | 8  | 3  | 0  | 1  | 1  | 2  |   |
| ENSP00000342100,ENSP00000342100,ENSP00000342100         | EXOC5                                           | 83  | 7  | 0  | 3  | 5  | 3  | 5  | 2  | 2  | 0  | 0  | 0  | 1  | 2  | 0  | 2  | 2  | 3  | 2  | 4  | 4  | 7  | 3  | 3  | 2  | 5  | 3  | 4  | 3  | 5  | 1  |   |
| ENSP00000342112_A937I,rs145600000136153                 | LMOT7                                           | 108 | 5  | 8  | 2  | 6  | 5  | 3  | 5  | 4  | 3  | 3  | 4  | 5  | 3  | 3  | 2  | 2  | 0  | 2  | 3  | 4  | 4  | 4  | 7  | 6  | 6  | 4  | 4  | 2  | 2  | 4  | 1 |
| ENSP00000342143,ENSP00000342143,ENSP00000342143         | PDZK1                                           | 18  | 6  | 2  | 4  | 3  | 1  | 2  | 0  | 0  | 0  | 0  | 0  | 0  | 0  | 0  | 0  | 0  | 0  | 0  | 0  | 0  | 0  | 0  | 0  | 0  | 0  | 0  | 0  | 0  | 0  | 0  |   |
| ENSP00000342181,ENSP00000342181,ENSP00000342181         | SRP72                                           | 298 | 17 | 8  | 8  | 8  | 14 | 8  | 14 | 9  | 8  | 7  | 1  | 6  | 6  | 6  | 8  | 11 | 18 | 13 | 11 | 13 | 8  | 14 | 5  | 7  | 14 | 18 | 10 | 9  | 10 | 9  |   |
| ENSP00000342214,ENSP00000342214,ENSP00000342214         | GHTM                                            | 36  | 3  | 3  | 2  | 0  | 0  | 1  | 1  | 0  | 0  | 0  | 1  | 2  | 0  | 1  | 0  | 0  | 2  | 1  | 1  | 2  | 1  | 4  | 1  | 2  | 1  | 1  | 0  | 2  | 2  | 2  | 2 |
| ENSP00000342259,ENSP00000342259,ENSP00000342259         | MEETSD1                                         | 42  | 1  | 2  | 0  | 3  | 1  | 1  | 4  | 1  | 2  | 1  | 1  | 1  | 0  | 1  | 0  | 0  | 2  | 2  | 3  | 1  | 0  | 1  | 3  | 0  | 2  | 4  | 0  | 2  | 1  | 1  | 2 |
| ENSP00000342278,ENSP00000342278,ENSP00000342278         | OAS2                                            | 21  | 0  | 0  | 0  | 0  | 0  | 11 | 4  | 5  | 0  | 0  | 0  | 0  | 0  | 0  | 0  | 0  | 0  | 0  | 0  | 0  | 0  | 1  | 0  | 0  | 0  | 0  | 0  | 0  | 0  | 0  |   |
| ENSP00000342300,ENSP00000342300,ENSP00000342300         | TH1L                                            | 93  | 4  | 2  | 2  | 2  | 5  | 3  | 3  | 3  | 5  | 2  | 0  | 2  | 3  | 0  | 3  | 4  | 5  | 4  | 2  | 2  | 2  | 2  | 1  | 1  | 6  | 5  | 5  | 5  | 6  | 4  |   |
| ENSP00000342316,ENSP00000342316,ENSP00000342316         | PGM1                                            | 251 | 5  | 8  | 6  | 9  | 12 | 6  | 9  | 7  | 5  | 4  | 0  | 0  | 9  | 9  | 7  | 15 | 18 | 11 | 15 | 23 | 9  | 6  | 2  | 1  | 12 | 13 | 6  | 9  | 10 | 5  |   |
| ENSP00000342321_rs34569,ENSP00000342321,ENSP00000342321 | AP3D1                                           | 35  | 2  | 0  | 1  | 2  | 3  | 2  | 2  | 1  | 1  | 1  | 0  | 1  | 1  | 0  | 0  | 2  | 3  | 1  | 3  | 0  | 1  | 1  | 0  | 0  | 1  | 3  | 0  | 2  | 0  | 1  |   |
| ENSP00000342333,ENSP00000342333,ENSP00000342333         | MPST                                            | 121 | 4  | 5  | 2  | 6  | 13 | 12 | 3  | 3  | 1  | 1  | 2  | 0  | 3  | 4  | 3  | 2  | 8  | 2  | 5  | 4  | 3  | 3  | 5  | 3  | 4  | 4  | 2  | 5  | 6  | 3  |   |
| ENSP00000342374,ENSP00000342374,ENSP00000342374         | SNRPD2                                          | 395 | 17 | 8  | 18 | 4  | 10 | 9  | 9  | 6  | 11 | 16 | 15 | 8  | 13 | 11 | 16 | 14 | 18 | 15 | 13 | 18 | 16 | 22 | 11 | 10 | 11 | 16 | 9  | 20 | 18 | 13 |   |
| ENSP00000342379_rs37441,ENSP00000342379,ENSP00000342379 | MPRII                                           | 186 | 6  | 7  | 4  | 1  | 1  | 1  | 6  | 0  | 6  | 7  | 6  | 8  | 16 | 9  | 10 | 2  | 4  | 3  | 11 | 8  | 8  | 21 | 17 | 16 | 1  | 3  | 3  | 0  | 0  | 1  |   |
| ENSP00000342381,ENSP00000342381,ENSP00000342381         | VRK2                                            | 40  | 1  | 1  | 1  | 1  | 0  | 0  | 1  | 1  | 1  | 2  | 3  | 1  | 3  | 2  | 2  | 2  | 1  | 1  | 1  | 2  | 3  | 1  | 2  | 3  | 0  | 1  | 1  | 0  | 1  | 1  |   |
| ENSP00000342402,ENSP00000342402,ENSP00000342402         | ENSP00000342402,ENSP00000342402,ENSP00000342402 | 103 | 2  | 3  | 2  | 1  | 0  | 1  | 4  | 1  | 4  | 12 | 7  | 8  | 1  | 1  | 3  | 1  | 2  | 5  | 5  | 4  | 5  | 7  | 2  | 6  | 2  | 2  | 4  | 3  | 2  | 3  |   |
| ENSP00000342434,ENSP00000342434,ENSP00000342434         | BAZ1B                                           | 519 | 18 | 15 | 10 | 13 | 10 | 13 | 14 | 8  | 12 | 38 | 20 | 30 | 14 | 8  | 21 | 11 | 12 | 14 | 18 | 25 | 28 | 29 | 19 | 22 | 12 | 10 | 5  | 24 | 28 | 18 |   |
| ENSP00000342445,ENSP00000342445,ENSP00000342445         | CDLN4                                           | 28  | 2  | 0  | 1  | 0  | 0  | 3  | 0  | 0  | 0  | 1  | 0  | 0  | 1  | 0  | 2  | 0  | 0  | 2  | 1  | 0  | 2  | 4  | 0  | 3  | 3  | 1  | 2  | 0  | 0  | 0  |   |
| ENSP00000342447,ENSP00000342447,ENSP00000342447         | ERAP2                                           | 24  | 0  | 0  | 0  | 6  | 4  | 2  | 0  | 0  | 0  | 0  | 0  | 0  | 0  | 0  | 2  | 1  | 0  | 0  | 0  | 2  | 0  | 1  | 0  | 0  | 0  | 0  | 0  | 1  | 0  | 1  |   |
| ENSP00000342492,ENSP00000342492,ENSP00000342492         | PARVB                                           | 19  | 1  | 0  | 1  | 0  | 0  | 1  | 1  | 0  | 1  | 1  | 0  | 1  | 0  | 0  | 0  | 2  | 0  | 1  | 1  | 0  | 0  | 1  | 1  | 0  | 2  | 1  | 0  | 0  | 3  | 0  |   |
| ENSP00000342502,ENSP00000342502,ENSP00000342502         | PYCR2                                           | 116 | 9  | 2  | 3  | 4  | 2  | 5  | 8  | 1  | 3  | 4  | 0  | 2  | 3  | 0  | 2  | 5  | 5  | 6  | 8  | 2  | 5  | 2  | 1  | 1  | 8  | 5  | 4  | 7  | 3  | 6  |   |
| ENSP00000342564,ENSP00000342564,ENSP00000342564         | ALDH6A1                                         | 135 | 5  | 8  | 3  | 4  | 2  | 2  | 2  | 0  | 5  | 2  | 7  | 3  | 4  | 3  | 5  | 3  | 4  | 5  | 3  | 3  | 9  | 7  | 6  | 10 | 14 | 10 | 4  | 0  | 0  |    |   |
| ENSP00000342692,ENSP00000342692,ENSP00000342692         | GOLGA2                                          | 127 | 8  | 4  | 3  | 6  | 3  | 3  | 7  | 9  | 3  | 2  | 1  | 3  | 2  | 3  | 1  | 4  | 5  | 2  | 6  | 7  | 2  | 7  | 8  | 4  | 6  | 5  | 2  | 3  | 3  | 5  |   |
| ENSP00000342710_S475C,Q,ENSP00000342710,ENSP00000342710 | KRT77                                           | 11  | 1  | 1  | 0  | 0  | 0  | 0  | 0  | 0  | 1  | 0  | 3  | 1  | 0  | 0  | 0  | 0  | 0  | 0  | 0  | 1  | 0  | 1  | 1  | 0  | 0  | 0  | 0  | 0  | 0  | 0  |   |
| ENSP00000342787,ENSP00000342787,ENSP00000342787         | RPLT2                                           | 144 | 9  | 5  | 4  | 5  | 8  | 6  | 5  | 4  | 4  | 7  | 0  | 5  | 1  | 5  | 7  | 2  | 5  | 5  | 8  | 5  | 5  | 5  | 2  | 5  | 7  | 1  | 5  | 1  | 8  | 5  |   |
| ENSP00000342800,ENSP00000342800,ENSP00000342800         | PKP2                                            | 162 | 9  | 11 | 15 | 3  | 0  | 1  | 3  | 2  | 3  | 3  | 1  | 2  | 3  | 3  | 8  | 1  | 1  | 2  | 7  | 6  | 11 | 9  | 5  | 11 | 19 | 14 | 8  | 1  | 0  | 0  |   |
| ENSP00000342830,ENSP00000342830,ENSP00000342830         | RDX                                             | 295 | 27 | 22 | 16 | 1  | 4  | 2  | 5  | 3  | 8  | 6  | 4  | 6  | 12 | 13 | 12 | 17 | 21 | 24 | 13 | 16 | 12 | 15 | 6  | 8  | 5  | 6  | 5  | 3  | 1  | 2  |   |
| ENSP00000342905,ENSP00000342905,ENSP00000342905         | ADNP                                            | 54  | 8  | 2  | 2  | 3  | 0  | 3  | 2  | 3  | 0  | 1  | 4  | 1  | 1  | 2  | 2  | 2  | 0  | 2  | 3  | 2  | 3  | 1  | 2  | 0  | 0  | 0  | 1  | 3  | 1  | 0  |   |
| ENSP00000342905_3048:CT,ENSP00000342905,ENSP00000342905 | ADNP                                            | 55  | 7  | 2  | 2  | 3  | 0  | 3  | 2  | 3  | 0  | 1  | 4  | 1  | 1  | 2  | 2  | 2  | 0  | 2  | 3  | 2  | 3  | 1  | 2  | 3  | 1  | 0  | 0  | 1  | 3  | 1  | 0 |
| ENSP00000342944,ENSP00000342944,ENSP00000342944         | TOP2A                                           | 624 | 42 | 26 | 23 | 27 | 17 | 15 | 22 | 13 | 18 | 38 | 18 | 25 | 24 | 22 | 32 | 5  | 5  | 6  | 38 | 39 | 28 | 30 | 24 | 14 | 8  | 8  | 7  | 14 | 16 | 20 |   |
| ENSP00000342962,ENSP00000342962,ENSP00000342962         | SERINC1                                         | 10  | 0  | 0  | 2  | 0  | 0  | 0  | 1  | 0  | 1  | 0  | 0  | 0  | 0  | 0  | 0  | 0  | 0  | 1  | 0  | 1  | 0  | 0  | 0  | 1  | 3  | 0  | 0  | 0  | 0  | 0  |   |
| ENSP00000342991,ENSP00000342991,ENSP00000342991         | CLYBL                                           | 65  | 0  | 0  | 0  | 7  | 10 | 8  | 4  | 3  | 0  | 0  | 0  | 0  | 1  | 0  | 1  | 5  | 6  | 3  | 4  | 3  | 0  | 2  | 1  | 0  | 2  | 3  | 0  | 0  | 2  | 0  |   |
| ENSP00000343026,ENSP00000343026,ENSP00000343026         | ATP7A                                           | 13  | 0  | 0  | 0  | 1  | 0  | 0  | 1  | 0  | 2  | 0  | 0  | 0  | 0  | 0  | 1  | 1  | 0  | 1  | 0  | 1  | 0  | 0  | 0  | 1  | 1  | 0  | 1  | 0  | 0  | 1  |   |
| ENSP00000343027,ENSP00000343027,ENSP00000343027         | GNAI1                                           | 44  | 0  | 0  | 0  | 1  | 0  | 1  | 1  | 1  | 1  | 2  | 2  | 0  | 3  | 1  | 1  | 1  | 4  | 2  | 3  | 0  | 1  | 2  | 4  | 1  | 3  | 2  | 3  | 1  | 2  | 0  | 2 |
| ENSP00000343032,ENSP00000343032,ENSP00000343032         | HMI13                                           | 278 | 20 | 15 | 17 | 11 | 11 | 10 | 14 | 6  | 12 | 8  | 2  | 9  | 12 | 4  | 10 | 2  | 11 | 8  | 14 | 15 | 7  | 10 | 7  | 6  | 9  | 7  | 5  | 3  | 8  | 5  |   |
| ENSP00000343033,ENSP00000343033,ENSP00000343033         | DHFR                                            | 55  | 2  | 1  | 1  | 0  | 4  | 1  | 1  | 1  | 3  | 1  | 0  | 0  | 0  | 3  | 0  | 2  | 1  | 2  | 1  | 3  | 5  | 4  | 2  | 1  | 1  | 3  | 3  | 4  | 2  | 1  | 2 |
| ENSP00000343040,ENSP00000343040,ENSP00000343040         | HMGGB1                                          | 508 | 20 | 11 | 16 | 23 | 37 | 28 | 27 | 4  | 12 | 25 | 8  | 8  | 16 | 14 | 8  | 14 | 26 | 13 | 21 | 22 | 17 | 22 | 7  | 9  | 19 | 21 | 18 | 14 | 9  | 9  |   |
| ENSP00000343042,ENSP00000343042,ENSP00000343042         | SRCAP                                           | 45  | 0  | 3  | 1  | 1  | 2  | 1  | 3  | 0  | 0  | 1  | 1  | 0  | 3  | 0  | 2  | 1  | 0  | 0  | 2  | 5  | 2  | 1  | 3  | 1  | 0  | 3  | 0  | 2  | 6  | 1  | 1 |
| ENSP00000343054,ENSP00000343054,ENSP00000343054         | RBMS5                                           | 90  | 3  | 4  | 2  | 4  | 2  | 3  | 1  | 3  | 0  | 1  | 5  | 4  | 3  | 3  | 6  | 5  | 6  | 3  | 3  | 2  | 1  | 4  | 3  | 1  | 0  | 3  | 1  | 3  | 7  | 4  |   |
| ENSP00000343081,ENSP00000343081,ENSP00000343081         | PUS7L                                           | 42  | 0  | 3  | 3  | 1  | 0  | 4  | 1  | 0  | 0  | 0  | 1  | 2  | 0  | 0  | 2  | 1  | 2  | 2  | 3  | 2  | 2  | 3  | 1  | 0  | 1  | 3  | 0  | 1  | 3  | 0  |   |
| ENSP00000343129,ENSP00000343129,ENSP00000343129         | TRIM29                                          | 47  | 0  | 0  | 0  | 0  | 0  | 9  | 6  | 6  | 11 | 5  | 7  | 0  | 0  | 0  | 0  | 0  | 0  | 0  | 0  | 0  | 0  | 1  | 0  | 2  | 0  | 0  | 0  | 0  | 0  | 0  |   |
| ENSP00000343147,ENSP00000343147,ENSP00000343147         | SPR3CB                                          | 22  | 1  | 1  | 0  | 1  | 1  | 0  | 1  | 1  | 0  | 0  | 0  | 0  | 0  | 1  | 1  | 2  | 1  | 2  | 0  | 1  | 0  | 1  | 2  | 0  | 0  | 1  | 1  | 1  | 1  | 1  |   |
| ENSP00000343204,ENSP00000343204,ENSP00000343204         | JKAI1                                           | 18  | 0  | 0  | 1  | 2  | 0  | 1  | 0  | 0  | 0  | 0  | 1  | 0  | 0  | 0  | 0  | 0  | 0  | 0  | 0  | 1  | 1  | 2  | 1  | 1  | 2  | 0  | 0  | 2  | 2  | 0  |   |
| ENSP00000343209,ENSP00000343209,ENSP00000343209         | NSD1                                            | 13  | 0  | 1  | 0  | 0  | 0  | 0  | 2  | 0  | 1  | 3  | 1  | 0  | 0  | 0  | 1  | 2  | 0  | 0  | 0  | 1  | 0  | 0  | 0  | 1  | 0  | 0  | 0  | 0  | 0  | 0  | 0 |
| ENSP00000343273,ENSP00000343273,ENSP00000343273         | KLHL7                                           | 10  | 0  | 0  | 0  | 0  | 0  | 0  | 0  | 0  | 1  | 0  | 0  | 0  | 1  | 0  | 0  | 3  | 0  | 1  | 1  | 0  | 0  | 1  | 0  | 0  | 0  | 1  | 0  | 1  | 0  | 0  | 0 |
| ENSP00000343274,ENSP00000343274,ENSP00000343274         | INTS8                                           | 20  | 0  | 0  | 0  | 2  | 1  | 0  | 2  | 0  | 1  | 0  | 0  | 1  | 2  | 0  | 1  | 2  | 1  | 1  | 1  | 2  | 1  | 1  | 0  | 1  | 0  | 0  | 0  | 0  | 0  | 0  | 0 |
| ENSP00000343313,ENSP00000343313,ENSP00000343313         | ATG5                                            | 22  | 0  | 2  | 1  | 0  | 0  | 3  | 1  | 2  | 0  | 0  | 2  | 0  | 0  | 0  | 0  | 0  | 2  | 0  | 0  | 2  | 0  | 2  | 0  | 2  | 0  | 2  | 1  | 1  | 0  | 0  | 1 |
| ENSP00000343317,ENSP00000343317,ENSP00000343317         |                                                 |     |    |    |    |    |    |    |    |    |    |    |    |    |    |    |    |    |    |    |    |    |    |    |    |    |    |    |    |    |    |    |   |

|                                          |                  |          |     |    |    |    |    |    |    |    |    |    |    |    |    |    |    |    |    |    |    |    |    |    |    |    |    |    |    |    |    |    |    |   |
|------------------------------------------|------------------|----------|-----|----|----|----|----|----|----|----|----|----|----|----|----|----|----|----|----|----|----|----|----|----|----|----|----|----|----|----|----|----|----|---|
| ENSP00000344556,ENSP000                  | ENSG000000302219 | ARID4A   | 19  | 0  | 2  | 1  | 1  | 2  | 0  | 0  | 0  | 0  | 0  | 0  | 0  | 0  | 0  | 1  | 2  | 0  | 1  | 0  | 2  | 0  | 2  | 1  | 1  | 1  | 1  | 0  | 1  | 0  | 0  | 0 |
| ENSP00000344572,ENSP000                  | ENSG000000172500 | FIBP     | 49  | 1  | 2  | 1  | 1  | 1  | 0  | 1  | 2  | 1  | 0  | 1  | 2  | 3  | 1  | 2  | 3  | 2  | 1  | 0  | 4  | 2  | 2  | 2  | 2  | 3  | 3  | 1  | 0  | 3  | 2  |   |
| ENSP00000344582,ENSP000                  | ENSG000000135540 | NHSL1    | 13  | 0  | 0  | 1  | 0  | 0  | 1  | 0  | 0  | 0  | 1  | 0  | 0  | 0  | 0  | 1  | 0  | 2  | 0  | 0  | 0  | 1  | 2  | 0  | 0  | 0  | 2  | 0  | 1  | 1  | 0  |   |
| ENSP00000344591,ENSP000                  | ENSG000000153317 | ASAP1    | 21  | 0  | 2  | 0  | 0  | 0  | 0  | 0  | 3  | 1  | 2  | 0  | 0  | 1  | 0  | 0  | 0  | 1  | 1  | 1  | 0  | 0  | 1  | 0  | 0  | 0  | 0  | 0  | 1  | 4  | 0  | 3 |
| ENSP00000344658                          | ENSG000000173267 | SNCG     | 18  | 0  | 0  | 0  | 0  | 0  | 0  | 0  | 0  | 0  | 0  | 0  | 0  | 0  | 0  | 0  | 5  | 7  | 5  | 1  | 0  | 0  | 0  | 0  | 0  | 0  | 0  | 0  | 0  | 0  | 0  |   |
| ENSP00000344659,ENSP000                  | ENSG000000149328 | GLB1L2   | 20  | 0  | 0  | 0  | 2  | 2  | 1  | 2  | 1  | 2  | 0  | 0  | 2  | 0  | 0  | 1  | 0  | 0  | 0  | 2  | 2  | 0  | 0  | 0  | 0  | 1  | 0  | 1  | 0  | 1  | 0  | 0 |
| ENSP00000344683,ENSP000                  | ENSG000000108465 | CDK5RAP3 | 150 | 5  | 3  | 4  | 3  | 4  | 5  | 3  | 2  | 7  | 5  | 1  | 3  | 6  | 2  | 6  | 3  | 6  | 8  | 5  | 5  | 5  | 9  | 5  | 8  | 10 | 4  | 8  | 5  | 4  | 6  |   |
| ENSP00000344707,ENSP000                  | ENSG000000172270 | BSG      | 262 | 6  | 5  | 7  | 3  | 5  | 4  | 7  | 2  | 8  | 17 | 7  | 9  | 10 | 6  | 13 | 11 | 21 | 13 | 8  | 8  | 8  | 10 | 7  | 8  | 8  | 11 | 7  | 15 | 9  | 9  |   |
| ENSP00000344707_R169W,ENSG000000172270   |                  | BSG      | 204 | 5  | 4  | 4  | 2  | 4  | 3  | 5  | 1  | 5  | 13 | 6  | 8  | 8  | 4  | 10 | 8  | 17 | 11 | 7  | 7  | 6  | 8  | 5  | 7  | 7  | 8  | 5  | 12 | 7  | 7  |   |
| ENSP00000344762,ENSP000                  | ENSG000000112081 | SFRS3    | 267 | 10 | 6  | 9  | 3  | 14 | 8  | 10 | 8  | 8  | 11 | 8  | 8  | 6  | 9  | 11 | 6  | 15 | 11 | 4  | 10 | 12 | 12 | 5  | 10 | 6  | 16 | 9  | 7  | 6  | 9  |   |
| ENSP00000344789,ENSP000                  | ENSG000000132142 | ACACA    | 296 | 14 | 4  | 12 | 14 | 9  | 9  | 31 | 24 | 25 | 2  | 0  | 1  | 6  | 2  | 10 | 8  | 10 | 11 | 12 | 16 | 8  | 5  | 1  | 3  | 20 | 14 | 7  | 7  | 4  | 7  |   |
| ENSP00000344816,ENSP000                  | ENSG000000160058 | BSDC1    | 12  | 0  | 1  | 0  | 1  | 1  | 0  | 1  | 1  | 1  | 1  | 0  | 0  | 0  | 1  | 0  | 0  | 0  | 0  | 1  | 0  | 0  | 0  | 0  | 1  | 0  | 2  | 0  | 0  | 0  | 0  |   |
| ENSP00000344822,ENSP000                  | ENSG000000189171 | S100A13  | 106 | 4  | 6  | 4  | 2  | 3  | 3  | 2  | 5  | 2  | 6  | 2  | 3  | 1  | 1  | 3  | 5  | 5  | 3  | 2  | 5  | 2  | 6  | 2  | 2  | 6  | 3  | 2  | 5  | 5  | 6  |   |
| ENSP00000344831                          | ENSG000000075303 | SLC25A40 | 21  | 0  | 0  | 1  | 0  | 1  | 1  | 0  | 0  | 1  | 1  | 0  | 2  | 1  | 0  | 2  | 1  | 0  | 1  | 1  | 1  | 1  | 1  | 0  | 1  | 1  | 1  | 2  | 0  | 0  | 0  |   |
| ENSP00000344832_rs11207,ENSG000000131236 |                  | CAP1     | 191 | 7  | 3  | 4  | 5  | 8  | 5  | 7  | 8  | 9  | 9  | 1  | 4  | 5  | 3  | 8  | 7  | 8  | 6  | 1  | 7  | 7  | 7  | 4  | 5  | 8  | 11 | 7  | 14 | 7  | 6  |   |
| ENSP00000344848_A4240T,ENSG000000178209  |                  | PLEC1    | 59  | 1  | 2  | 2  | 2  | 2  | 0  | 3  | 1  | 1  | 4  | 3  | 4  | 4  | 5  | 3  | 3  | 2  | 2  | 2  | 2  | 2  | 2  | 3  | 1  | 1  | 1  | 1  | 0  | 0  | 0  |   |
| ENSP00000344848_S3933N,ENSG000000178209  |                  | PLEC1    | 62  | 1  | 2  | 2  | 2  | 2  | 0  | 3  | 1  | 1  | 4  | 3  | 4  | 6  | 5  | 4  | 2  | 2  | 2  | 2  | 2  | 2  | 3  | 1  | 1  | 1  | 1  | 0  | 0  | 0  | 0  |   |
| ENSP00000344868,ENSP000                  | ENSG000000122545 | SEPT7    | 225 | 12 | 9  | 8  | 7  | 7  | 4  | 9  | 10 | 7  | 10 | 2  | 4  | 6  | 7  | 7  | 6  | 7  | 7  | 9  | 9  | 8  | 9  | 5  | 14 | 5  | 5  | 11 | 8  | 8  |    |   |
| ENSP00000344894,ENSP000                  | ENSG000000133816 | MAL2     | 22  | 3  | 0  | 1  | 0  | 0  | 0  | 3  | 1  | 1  | 0  | 0  | 2  | 0  | 1  | 0  | 1  | 0  | 0  | 0  | 0  | 0  | 0  | 1  | 1  | 4  | 1  | 0  | 1  | 1  | 0  |   |
| ENSP00000344903,ENSP000                  | ENSG000000198517 | MAFK     | 31  | 0  | 0  | 0  | 1  | 1  | 1  | 1  | 2  | 1  | 2  | 2  | 2  | 1  | 1  | 0  | 1  | 1  | 1  | 1  | 1  | 1  | 2  | 2  | 2  | 0  | 1  | 0  | 1  | 1  | 1  |   |
| ENSP00000344925,ENSP000                  | ENSG000000109854 | HTATIP2  | 71  | 4  | 1  | 3  | 2  | 4  | 6  | 4  | 3  | 4  | 7  | 0  | 2  | 2  | 1  | 2  | 1  | 1  | 2  | 3  | 2  | 3  | 2  | 1  | 2  | 3  | 1  | 1  | 2  | 1  | 1  |   |
| ENSP00000344942                          | ENSG000000175970 | UNC119B  | 29  | 0  | 0  | 1  | 2  | 2  | 2  | 0  | 0  | 1  | 2  | 0  | 0  | 0  | 0  | 2  | 2  | 1  | 1  | 1  | 1  | 1  | 1  | 0  | 0  | 2  | 1  | 1  | 3  | 1  | 1  |   |
| ENSP00000344996                          | ENSG000000187867 |          | 18  | 8  | 7  | 2  | 0  | 0  | 0  | 0  | 0  | 0  | 0  | 0  | 0  | 0  | 0  | 0  | 0  | 0  | 0  | 0  | 0  | 0  | 0  | 0  | 0  | 0  | 0  | 0  | 0  | 1  | 0  |   |
| ENSP00000345079,ENSP000                  | ENSG000000159176 | CSR1P    | 97  | 5  | 3  | 4  | 5  | 3  | 3  | 4  | 1  | 3  | 3  | 3  | 2  | 2  | 4  | 3  | 2  | 4  | 1  | 4  | 4  | 3  | 2  | 2  | 5  | 6  | 2  | 6  | 2  | 4  |    |   |
| ENSP00000345133,ENSP000                  | ENSG000000171219 | CDC42BPG | 32  | 2  | 3  | 1  | 1  | 1  | 2  | 2  | 1  | 0  | 0  | 0  | 0  | 0  | 2  | 0  | 1  | 2  | 1  | 1  | 3  | 1  | 2  | 0  | 1  | 1  | 2  | 1  | 0  | 0  | 0  |   |
| ENSP00000345156,ENSP000                  | ENSG000000139239 | RPL14P1  | 433 | 17 | 16 | 8  | 13 | 19 | 11 | 18 | 13 | 9  | 13 | 5  | 16 | 11 | 16 | 14 | 10 | 17 | 14 | 16 | 21 | 8  | 17 | 20 | 10 | 14 | 23 | 11 | 21 | 20 | 12 |   |
| ENSP00000345195                          | ENSG000000188021 | UBQLN2   | 90  | 1  | 0  | 4  | 2  | 2  | 2  | 3  | 3  | 1  | 2  | 2  | 2  | 4  | 5  | 1  | 4  | 4  | 1  | 6  | 3  | 2  | 1  | 5  | 5  | 5  | 8  | 1  | 6  |    |    |   |
| ENSP00000345216                          | ENSG000000166348 | USP54    | 18  | 1  | 0  | 0  | 1  | 1  | 0  | 0  | 0  | 1  | 2  | 2  | 0  | 2  | 1  | 0  | 2  | 1  | 0  | 0  | 0  | 0  | 0  | 0  | 1  | 0  | 2  | 0  | 1  | 0  | 0  |   |
| ENSP00000345230                          | ENSG000000174660 | TPM4     | 603 | 29 | 26 | 14 | 18 | 15 | 10 | 20 | 14 | 9  | 20 | 13 | 12 | 19 | 35 | 18 | 13 | 32 | 14 | 23 | 30 | 19 | 21 | 17 | 11 | 24 | 24 | 18 | 38 | 23 | 24 |   |
| ENSP00000345282                          | ENSG000000166123 | GP2T     | 47  | 4  | 2  | 2  | 2  | 2  | 0  | 2  | 2  | 1  | 1  | 1  | 1  | 0  | 1  | 1  | 2  | 0  | 2  | 2  | 2  | 2  | 1  | 0  | 2  | 2  | 1  | 2  | 3  | 2  | 3  |   |
| ENSP00000345292,ENSP000                  | ENSG000000101079 | NRD3G    | 28  | 1  | 1  | 0  | 2  | 3  | 2  | 1  | 0  | 0  | 1  | 1  | 1  | 1  | 1  | 1  | 0  | 1  | 0  | 1  | 2  | 1  | 1  | 0  | 1  | 1  | 3  | 0  | 0  | 1  | 0  |   |
| ENSP00000345297,ENSP000                  | ENSG000000108312 | UBTF     | 233 | 7  | 9  | 7  | 6  | 8  | 5  | 6  | 8  | 10 | 9  | 11 | 6  | 6  | 7  | 8  | 7  | 9  | 9  | 7  | 11 | 6  | 11 | 9  | 7  | 9  | 10 | 6  | 8  | 6  | 5  |   |
| ENSP00000345341,ENSP000                  | ENSG000000148334 | PTGES    | 64  | 2  | 1  | 1  | 0  | 2  | 2  | 1  | 1  | 2  | 4  | 0  | 0  | 1  | 0  | 1  | 2  | 4  | 2  | 1  | 1  | 3  | 4  | 1  | 4  | 3  | 4  | 4  | 5  | 4  | 4  |   |
| ENSP00000345358,ENSP000                  | ENSG000000187778 | MCRS1    | 10  | 0  | 1  | 0  | 0  | 0  | 0  | 0  | 0  | 1  | 0  | 0  | 0  | 1  | 0  | 0  | 1  | 0  | 1  | 1  | 1  | 0  | 0  | 0  | 0  | 0  | 0  | 0  | 0  | 1  | 3  |   |
| ENSP00000345393,ENSP000                  | ENSG000000185022 | MAFF     | 45  | 1  | 0  | 1  | 1  | 1  | 1  | 2  | 3  | 1  | 2  | 3  | 3  | 1  | 2  | 0  | 1  | 1  | 1  | 2  | 3  | 1  | 2  | 3  | 2  | 0  | 0  | 0  | 0  | 3  | 1  | 3 |
| ENSP00000345412,ENSP000                  | ENSG000000149532 |          | 95  | 6  | 2  | 3  | 4  | 2  | 3  | 2  | 3  | 5  | 5  | 4  | 3  | 4  | 2  | 5  | 2  | 2  | 2  | 3  | 2  | 3  | 5  | 1  | 4  | 5  | 2  | 3  | 3  | 3  | 2  |   |
| ENSP00000345445_rs37614,ENSG000000100347 |                  | SAMM50   | 92  | 4  | 0  | 5  | 1  | 3  | 4  | 2  | 0  | 3  | 7  | 0  | 5  | 3  | 0  | 4  | 5  | 1  | 5  | 1  | 0  | 1  | 8  | 2  | 9  | 5  | 2  | 3  | 4  | 1  | 4  |   |
| ENSP00000345456                          | ENSG000000140694 | PARN     | 94  | 2  | 2  | 2  | 2  | 2  | 2  | 3  | 5  | 2  | 2  | 1  | 3  | 1  | 2  | 2  | 4  | 3  | 5  | 2  | 4  | 3  | 7  | 3  | 3  | 4  | 4  | 3  | 9  | 2  | 5  |   |
| ENSP00000345494,ENSP000                  | ENSG000000188313 | PLSCR1   | 34  | 2  | 0  | 1  | 1  | 0  | 1  | 3  | 2  | 3  | 0  | 1  | 0  | 0  | 0  | 3  | 1  | 1  | 0  | 3  | 1  | 1  | 3  | 1  | 3  | 1  | 0  | 2  | 0  | 0  | 0  |   |
| ENSP00000345530,ENSP000                  | ENSG000000069869 | NEDD4    | 33  | 2  | 0  | 2  | 2  | 0  | 1  | 0  | 0  | 1  | 2  | 0  | 0  | 1  | 0  | 1  | 0  | 1  | 1  | 2  | 4  | 0  | 0  | 0  | 1  | 2  | 1  | 1  | 5  | 0  | 2  |   |
| ENSP00000345575,ENSP000                  | ENSG000000148719 | DNAB12   | 52  | 2  | 3  | 2  | 2  | 3  | 2  | 2  | 3  | 3  | 0  | 0  | 1  | 2  | 2  | 1  | 2  | 1  | 1  | 2  | 4  | 1  | 1  | 3  | 0  | 0  | 2  | 0  | 2  | 3  | 2  |   |
| ENSP00000345640                          | ENSG000000148737 | TCF7L2   | 10  | 0  | 0  | 0  | 0  | 1  | 1  | 0  | 0  | 0  | 0  | 0  | 0  | 0  | 1  | 1  | 0  | 0  | 1  | 0  | 0  | 0  | 0  | 0  | 2  | 1  | 0  | 1  | 0  | 0  | 0  |   |
| ENSP00000345656_T262S,ENSG000000101558   |                  | VAPA     | 264 | 8  | 9  | 9  | 10 | 7  | 7  | 17 | 10 | 8  | 7  | 7  | 5  | 6  | 8  | 9  | 8  | 14 | 8  | 12 | 9  | 6  | 14 | 12 | 13 | 6  | 8  | 5  | 9  | 8  | 5  |   |
| ENSP00000345671,ENSP000                  | ENSG000000124151 | NCOA3    | 13  | 2  | 1  | 0  | 0  | 0  | 1  | 1  | 0  | 1  | 0  | 0  | 0  | 2  | 0  | 0  | 0  | 2  | 1  | 0  | 0  | 0  | 1  | 0  | 0  | 0  | 0  | 0  | 0  | 1  | 0  |   |
| ENSP00000345674,ENSP000                  | ENSG000000105669 | COPE     | 151 | 10 | 1  | 7  | 8  | 7  | 9  | 1  | 2  | 6  | 3  | 0  | 0  | 3  | 3  | 5  | 5  | 2  | 2  | 3  | 11 | 3  | 5  | 3  | 2  | 13 | 10 | 8  | 10 | 3  | 6  |   |
| ENSP00000345680,ENSP000                  | ENSG000000106976 | DNM1     | 84  | 1  | 1  | 2  | 3  | 4  | 2  | 7  | 5  | 9  | 2  | 0  | 1  | 2  | 0  | 3  | 1  | 4  | 1  | 4  | 5  | 2  | 4  | 2  | 1  | 3  | 5  | 3  | 2  | 4  | 1  |   |
| ENSP00000345689,ENSP000                  | ENSG000000108774 | RAB5C    | 183 | 10 | 4  | 8  | 4  | 6  | 6  | 3  | 6  | 7  | 11 | 1  | 3  | 6  | 1  | 8  | 4  | 4  | 8  | 4  | 5  | 8  | 10 | 2  | 11 | 11 | 4  | 6  | 9  | 5  | 8  |   |
| ENSP00000345700                          | ENSG000000080845 | DLGAP4   | 33  | 3  | 4  | 2  | 1  | 2  | 2  | 2  | 1  | 1  | 0  | 0  | 1  | 1  | 0  | 0  | 1  | 0  | 0  | 1  | 1  | 1  | 0  | 0  | 0  | 3  | 2  | 2  | 1  | 0  | 1  |   |
| ENSP00000345719                          | ENSG000000136827 | TOR1A    | 73  | 0  | 0  | 0  | 3  | 2  | 1  | 5  | 0  | 0  | 1  | 0  | 0  | 2  | 7  | 0  | 6  | 1  | 2  | 2  | 6  | 3  | 3  | 3  | 1  | 2  | 3  | 3  | 1  | 4  | 7  | 5 |
| ENSP00000345731_rs11349,ENSG000000075711 |                  | DLG1     | 133 | 8  | 4  | 5  | 8  | 7  | 5  | 4  | 2  | 2  | 8  | 2  | 6  | 4  | 2  | 3  | 7  | 6  | 3  | 6  | 7  | 3  | 5  | 3  | 4  | 5  | 5  | 4  | 1  | 2  | 2  |   |
| ENSP00000345739,ENSP000                  | ENSG000000130816 | DNMT1    | 316 | 16 | 11 | 11 | 14 | 11 | 3  | 12 | 0  | 8  | 6  | 7  | 8  | 11 | 15 | 14 | 13 |    |    |    |    |    |    |    |    |    |    |    |    |    |    |   |

|                                                                         |              |     |    |    |    |    |    |    |    |    |    |    |    |    |    |    |    |    |    |    |    |    |    |    |    |    |    |    |    |    |    |    |
|-------------------------------------------------------------------------|--------------|-----|----|----|----|----|----|----|----|----|----|----|----|----|----|----|----|----|----|----|----|----|----|----|----|----|----|----|----|----|----|----|
| ENSP00000346588,ENSP00000346588,ENSP00000346588                         | MED23        | 48  | 2  | 2  | 2  | 2  | 1  | 1  | 2  | 2  | 0  | 2  | 2  | 2  | 3  | 2  | 1  | 2  | 1  | 2  | 2  | 2  | 2  | 1  | 2  | 2  | 0  | 1  | 1  | 2  | 1  | 1  |
| ENSP00000346634,ENSP00000346634,ENSP00000346634                         | THRAP3       | 491 | 15 | 18 | 9  | 9  | 10 | 12 | 14 | 16 | 8  | 26 | 16 | 10 | 10 | 18 | 21 | 4  | 13 | 15 | 21 | 22 | 27 | 24 | 20 | 15 | 18 | 14 | 13 | 31 | 27 | 15 |
| ENSP00000346634,ENSP00000346634,ENSP00000346634                         | THRAP3       | 527 | 15 | 18 | 11 | 9  | 10 | 13 | 17 | 18 | 11 | 28 | 16 | 11 | 11 | 18 | 24 | 4  | 15 | 16 | 24 | 25 | 30 | 24 | 20 | 14 | 18 | 15 | 14 | 31 | 29 | 18 |
| ENSP00000346643,ENSP00000346643,ENSP00000346643                         | HKDC1        | 170 | 16 | 8  | 8  | 16 | 20 | 12 | 17 | 11 | 10 | 3  | 1  | 2  | 1  | 0  | 1  | 5  | 8  | 3  | 2  | 1  | 1  | 6  | 1  | 2  | 2  | 3  | 2  | 4  | 2  | 2  |
| ENSP00000346678,ENSP00000346678,ENSP00000346678                         | RSRC2        | 55  | 2  | 2  | 2  | 1  | 2  | 3  | 2  | 2  | 2  | 1  | 1  | 1  | 0  | 3  | 1  | 1  | 2  | 2  | 3  | 2  | 1  | 2  | 2  | 4  | 1  | 2  | 1  | 2  | 2  | 1  |
| ENSP00000346762,ENSP00000346762,ENSP00000346762                         | SNDR1        | 835 | 46 | 34 | 33 | 22 | 31 | 29 | 28 | 28 | 26 | 39 | 14 | 19 | 15 | 19 | 17 | 15 | 26 | 21 | 18 | 25 | 20 | 48 | 28 | 27 | 45 | 28 | 33 | 40 | 26 | 35 |
| ENSP00000346785,ENSP00000346785,ENSP00000346785                         | DTM2         | 202 | 7  | 3  | 6  | 5  | 9  | 9  | 4  | 4  | 7  | 5  | 5  | 5  | 9  | 3  | 8  | 8  | 6  | 6  | 4  | 10 | 7  | 5  | 3  | 2  | 9  | 12 | 6  | 12 | 10 | 13 |
| ENSP00000346789,ENSP00000346789,ENSP00000346789                         | GMBF         | 45  | 1  | 2  | 1  | 1  | 3  | 2  | 1  | 2  | 1  | 1  | 0  | 0  | 1  | 4  | 1  | 1  | 2  | 2  | 1  | 4  | 2  | 1  | 2  | 0  | 2  | 1  | 1  | 2  | 3  | 0  |
| ENSP00000346874_K63N,ENSP00000346874_K63N,ENSP00000346874_K63N          | FAR1         | 11  | 1  | 1  | 0  | 0  | 0  | 0  | 0  | 1  | 0  | 0  | 0  | 0  | 1  | 2  | 1  | 0  | 0  | 1  | 1  | 1  | 0  | 0  | 0  | 0  | 0  | 0  | 0  | 1  | 0  | 0  |
| ENSP00000346886,ENSP00000346886,ENSP00000346886                         | GABPA        | 23  | 1  | 1  | 0  | 0  | 3  | 0  | 1  | 0  | 0  | 1  | 0  | 0  | 0  | 1  | 0  | 1  | 2  | 0  | 2  | 1  | 1  | 0  | 0  | 1  | 1  | 2  | 0  | 1  | 0  | 2  |
| ENSP00000346890,ENSP00000346890,ENSP00000346890                         | NRD1         | 131 | 10 | 4  | 4  | 9  | 8  | 11 | 8  | 3  | 3  | 1  | 0  | 0  | 6  | 4  | 4  | 6  | 8  | 4  | 8  | 2  | 4  | 1  | 1  | 1  | 4  | 2  | 1  | 5  | 5  | 4  |
| ENSP00000346913,ENSP00000346913,ENSP00000346913                         | INTS4        | 62  | 2  | 0  | 1  | 3  | 2  | 1  | 1  | 1  | 1  | 1  | 2  | 1  | 3  | 1  | 0  | 3  | 7  | 5  | 3  | 3  | 2  | 3  | 0  | 2  | 0  | 3  | 1  | 4  | 1  | 5  |
| ENSP00000346921,ENSP00000346921,ENSP00000346921                         | AK2          | 419 | 6  | 5  | 4  | 7  | 15 | 10 | 14 | 6  | 8  | 18 | 21 | 10 | 16 | 16 | 15 | 15 | 15 | 18 | 14 | 26 | 15 | 12 | 22 | 9  | 13 | 20 | 13 | 21 | 21 | 14 |
| ENSP00000346976,ENSP00000346976,ENSP00000346976                         | LSR          | 164 | 14 | 9  | 6  | 1  | 2  | 4  | 6  | 5  | 9  | 5  | 5  | 5  | 3  | 6  | 7  | 0  | 6  | 10 | 7  | 7  | 6  | 7  | 7  | 4  | 10 | 7  | 5  | 0  | 1  | 0  |
| ENSP00000347005,ENSP00000347005,ENSP00000347005                         | LUC7L2       | 407 | 16 | 19 | 13 | 12 | 8  | 10 | 14 | 11 | 6  | 12 | 13 | 8  | 9  | 17 | 9  | 7  | 14 | 15 | 12 | 23 | 13 | 25 | 22 | 10 | 21 | 14 | 9  | 16 | 16 | 13 |
| ENSP00000347009,ENSP00000347009,ENSP00000347009                         | STK3         | 108 | 2  | 3  | 2  | 5  | 4  | 5  | 7  | 3  | 2  | 2  | 0  | 1  | 4  | 4  | 4  | 6  | 8  | 7  | 5  | 4  | 4  | 0  | 1  | 3  | 3  | 3  | 1  | 4  | 5  | 6  |
| ENSP00000347020,ENSP00000347020,ENSP00000347020                         | TXNRD1       | 138 | 4  | 2  | 3  | 8  | 2  | 9  | 8  | 2  | 6  | 0  | 0  | 1  | 4  | 1  | 6  | 4  | 3  | 9  | 8  | 7  | 11 | 4  | 1  | 4  | 5  | 4  | 3  | 7  | 4  | 8  |
| ENSP00000347032,ENSP00000347032,ENSP00000347032                         | PIPAK2C      | 87  | 3  | 1  | 3  | 4  | 5  | 5  | 5  | 2  | 2  | 1  | 0  | 1  | 3  | 0  | 3  | 6  | 4  | 5  | 1  | 3  | 3  | 3  | 1  | 3  | 3  | 3  | 4  | 3  | 3  | 4  |
| ENSP00000347046,ENSP00000347046,ENSP00000347046                         | PDE5A        | 21  | 1  | 2  | 1  | 0  | 0  | 0  | 2  | 1  | 2  | 0  | 0  | 0  | 0  | 1  | 0  | 0  | 0  | 1  | 0  | 0  | 0  | 2  | 1  | 4  | 1  | 1  | 0  | 1  | 0  | 1  |
| ENSP00000347164,ENSP00000347164,ENSP00000347164                         | ANXA4        | 817 | 23 | 17 | 13 | 35 | 85 | 47 | 52 | 44 | 47 | 21 | 1  | 9  | 21 | 14 | 17 | 21 | 20 | 14 | 19 | 20 | 12 | 37 | 21 | 26 | 50 | 43 | 29 | 23 | 18 | 18 |
| ENSP00000347164_rs22282,ENSP00000347164_rs22282,ENSP00000347164_rs22282 | ANXA4        | 794 | 23 | 17 | 12 | 40 | 88 | 56 | 47 | 42 | 43 | 20 | 1  | 9  | 19 | 14 | 16 | 19 | 20 | 14 | 16 | 20 | 11 | 32 | 21 | 23 | 45 | 43 | 25 | 22 | 18 | 18 |
| ENSP00000347169,ENSP00000347169,ENSP00000347169                         | NUMB         | 30  | 1  | 3  | 2  | 2  | 3  | 1  | 1  | 2  | 1  | 0  | 1  | 3  | 1  | 0  | 0  | 0  | 0  | 1  | 1  | 2  | 0  | 1  | 0  | 2  | 1  | 0  | 1  | 0  | 1  | 0  |
| ENSP00000347184,ENSP00000347184,ENSP00000347184                         | HTT          | 58  | 4  | 1  | 5  | 2  | 0  | 1  | 2  | 0  | 1  | 1  | 0  | 0  | 3  | 0  | 3  | 1  | 0  | 2  | 5  | 2  | 3  | 1  | 0  | 2  | 5  | 6  | 3  | 3  | 0  | 2  |
| ENSP00000347198,ENSP00000347198,ENSP00000347198                         | SRGAP1       | 25  | 2  | 1  | 2  | 1  | 1  | 0  | 0  | 0  | 1  | 1  | 0  | 0  | 0  | 0  | 0  | 1  | 1  | 1  | 1  | 0  | 2  | 3  | 1  | 1  | 1  | 0  | 1  | 2  | 0  | 1  |
| ENSP00000347226,ENSP00000347226,ENSP00000347226                         | FAR1         | 17  | 1  | 1  | 0  | 1  | 0  | 1  | 1  | 2  | 1  | 0  | 1  | 1  | 0  | 1  | 0  | 0  | 2  | 1  | 1  | 0  | 0  | 0  | 0  | 0  | 0  | 1  | 0  | 0  | 0  | 0  |
| ENSP00000347232,ENSP00000347232,ENSP00000347232                         | BLM          | 21  | 0  | 1  | 0  | 1  | 0  | 3  | 3  | 0  | 0  | 2  | 0  | 0  | 2  | 0  | 2  | 0  | 1  | 1  | 1  | 1  | 0  | 0  | 0  | 0  | 0  | 0  | 0  | 0  | 0  | 3  |
| ENSP00000347244,ENSP00000347244,ENSP00000347244                         | ITSN2        | 27  | 0  | 0  | 2  | 0  | 0  | 0  | 2  | 1  | 1  | 1  | 0  | 0  | 0  | 0  | 0  | 0  | 1  | 1  | 2  | 1  | 1  | 1  | 3  | 1  | 2  | 0  | 1  | 0  | 1  | 5  |
| ENSP00000347271,ENSP00000347271,ENSP00000347271                         | RPS10P11,RP5 | 188 | 10 | 6  | 8  | 4  | 7  | 6  | 6  | 2  | 4  | 7  | 2  | 4  | 7  | 9  | 5  | 4  | 4  | 9  | 4  | 7  | 9  | 7  | 8  | 4  | 10 | 7  | 5  | 9  | 8  | 6  |
| ENSP00000347276,ENSP00000347276,ENSP00000347276                         | KANK2        | 20  | 0  | 0  | 0  | 0  | 0  | 0  | 0  | 1  | 0  | 1  | 0  | 0  | 0  | 3  | 0  | 1  | 0  | 1  | 3  | 0  | 4  | 2  | 1  | 0  | 0  | 0  | 0  | 1  | 1  | 0  |
| ENSP00000347322,ENSP00000347322,ENSP00000347322                         | C6orf89      | 17  | 0  | 0  | 0  | 1  | 3  | 1  | 3  | 1  | 1  | 0  | 0  | 0  | 0  | 0  | 0  | 0  | 0  | 1  | 1  | 0  | 0  | 1  | 0  | 1  | 0  | 1  | 0  | 1  | 0  | 1  |
| ENSP00000347359,ENSP00000347359,ENSP00000347359                         | ATPV61H      | 57  | 3  | 0  | 4  | 1  | 0  | 2  | 4  | 1  | 3  | 4  | 1  | 1  | 0  | 0  | 2  | 0  | 0  | 2  | 0  | 1  | 5  | 0  | 0  | 2  | 3  | 2  | 2  | 5  | 2  | 7  |
| ENSP00000347375,ENSP00000347375,ENSP00000347375                         | TBC1D9B      | 65  | 6  | 2  | 3  | 2  | 1  | 4  | 1  | 0  | 1  | 0  | 1  | 1  | 1  | 1  | 2  | 3  | 1  | 1  | 4  | 2  | 2  | 3  | 2  | 3  | 5  | 4  | 1  | 4  | 2  | 2  |
| ENSP00000347379,ENSP00000347379,ENSP00000347379                         | OCLN         | 147 | 12 | 8  | 10 | 4  | 0  | 2  | 4  | 3  | 5  | 1  | 2  | 3  | 4  | 2  | 8  | 4  | 5  | 4  | 11 | 6  | 12 | 5  | 5  | 12 | 4  | 6  | 5  | 0  | 0  | 0  |
| ENSP00000347380_K336N,ENSP00000347380_K336N,ENSP00000347380_K336N       | SYNCRIP      | 906 | 33 | 23 | 26 | 13 | 23 | 19 | 21 | 31 | 28 | 62 | 16 | 27 | 29 | 24 | 36 | 34 | 36 | 31 | 24 | 35 | 38 | 41 | 30 | 34 | 37 | 43 | 28 | 33 | 27 | 24 |
| ENSP00000347392,ENSP00000347392,ENSP00000347392                         | KIF1B        | 37  | 1  | 4  | 0  | 3  | 1  | 1  | 0  | 0  | 0  | 1  | 0  | 2  | 2  | 1  | 0  | 1  | 1  | 0  | 2  | 2  | 1  | 2  | 1  | 0  | 3  | 3  | 1  | 0  | 2  | 2  |
| ENSP00000347408,ENSP00000347408,ENSP00000347408                         | AP3M1        | 24  | 2  | 0  | 1  | 1  | 0  | 0  | 2  | 0  | 1  | 1  | 0  | 0  | 0  | 0  | 2  | 1  | 1  | 1  | 2  | 0  | 1  | 1  | 0  | 0  | 2  | 0  | 3  | 1  | 0  | 1  |
| ENSP00000347444_rs20457,ENSP00000347444_rs20457,ENSP00000347444_rs20457 | TDOR7        | 28  | 3  | 2  | 1  | 2  | 0  | 0  | 0  | 0  | 0  | 0  | 0  | 0  | 0  | 1  | 2  | 1  | 0  | 2  | 1  | 0  | 2  | 0  | 0  | 2  | 1  | 0  | 4  | 1  | 3  | 3  |
| ENSP00000347454,ENSP00000347454,ENSP00000347454                         | ANO1         | 21  | 0  | 0  | 0  | 1  | 1  | 1  | 2  | 2  | 1  | 1  | 3  | 0  | 0  | 0  | 0  | 2  | 1  | 0  | 0  | 0  | 0  | 1  | 2  | 1  | 0  | 1  | 0  | 0  | 0  | 0  |
| ENSP00000347464,ENSP00000347464,ENSP00000347464                         | GIT2         | 19  | 1  | 0  | 2  | 1  | 0  | 1  | 0  | 0  | 0  | 0  | 0  | 0  | 0  | 2  | 0  | 1  | 2  | 0  | 1  | 1  | 0  | 1  | 0  | 0  | 0  | 0  | 0  | 1  | 3  | 2  |
| ENSP00000347495_AS3V,ENSP00000347495_AS3V,ENSP00000347495_AS3V          | WARS         | 480 | 13 | 10 | 13 | 12 | 23 | 18 | 16 | 11 | 14 | 17 | 6  | 10 | 15 | 10 | 12 | 22 | 18 | 19 | 16 | 16 | 15 | 23 | 9  | 11 | 25 | 17 | 15 | 40 | 19 | 15 |
| ENSP00000347514,ENSP00000347514,ENSP00000347514                         | MIER1        | 19  | 1  | 0  | 0  | 1  | 0  | 0  | 2  | 1  | 1  | 0  | 0  | 0  | 0  | 0  | 0  | 1  | 0  | 1  | 2  | 0  | 1  | 0  | 1  | 1  | 1  | 1  | 0  | 2  | 0  | 2  |
| ENSP00000347566,ENSP00000347566,ENSP00000347566                         | ZNF318       | 38  | 2  | 1  | 1  | 3  | 1  | 0  | 0  | 1  | 0  | 3  | 0  | 3  | 0  | 1  | 2  | 0  | 2  | 1  | 2  | 3  | 1  | 1  | 1  | 0  | 2  | 1  | 1  | 3  | 1  | 1  |
| ENSP00000347581,ENSP00000347581,ENSP00000347581                         | AGK          | 103 | 4  | 3  | 3  | 1  | 2  | 0  | 3  | 4  | 3  | 6  | 2  | 4  | 2  | 1  | 2  | 0  | 6  | 5  | 2  | 5  | 1  | 5  | 5  | 4  | 3  | 3  | 4  | 8  | 8  | 4  |
| ENSP00000347626_rs11550,ENSP00000347626_rs11550,ENSP00000347626_rs11550 | NUDCD3       | 34  | 2  | 2  | 2  | 2  | 1  | 1  | 1  | 0  | 1  | 2  | 0  | 1  | 1  | 3  | 2  | 0  | 0  | 1  | 1  | 3  | 0  | 2  | 1  | 0  | 1  | 2  | 1  | 0  | 1  | 1  |
| ENSP00000347648,ENSP00000347648,ENSP00000347648                         | FSY512       | 29  | 0  | 1  | 0  | 0  | 1  | 1  | 0  | 0  | 0  | 3  | 2  | 3  | 0  | 0  | 0  | 0  | 3  | 1  | 0  | 0  | 0  | 3  | 1  | 1  | 1  | 5  | 1  | 2  | 0  | 0  |
| ENSP00000347655,ENSP00000347655,ENSP00000347655                         | GRK6         | 13  | 0  | 0  | 0  | 0  | 1  | 0  | 0  | 0  | 0  | 1  | 0  | 0  | 0  | 1  | 0  | 0  | 0  | 0  | 1  | 0  | 1  | 0  | 0  | 1  | 3  | 0  | 1  | 1  | 2  | 2  |
| ENSP00000347664,ENSP00000347664,ENSP00000347664                         | VAMP1        | 25  | 0  | 0  | 1  | 1  | 0  | 0  | 1  | 2  | 1  | 0  | 1  | 0  | 0  | 0  | 1  | 1  | 0  | 0  | 1  | 1  | 1  | 3  | 2  | 2  | 1  | 3  | 0  | 1  | 0  | 0  |
| ENSP00000347703,ENSP00000347703,ENSP00000347703                         | KIF13B       | 65  | 2  | 2  | 1  | 5  | 3  | 3  | 1  | 1  | 3  | 1  | 0  | 1  | 2  | 1  | 1  | 3  | 1  | 1  | 1  | 1  | 0  | 6  | 3  | 3  | 5  | 4  | 5  | 1  | 3  | 1  |
| ENSP00000347717,ENSP00000347717,ENSP00000347717                         | THCD         | 81  | 6  | 2  | 6  | 2  | 1  | 4  | 4  | 4  | 3  | 0  | 3  | 2  | 1  | 0  | 2  | 0  | 3  | 3  | 4  | 4  | 2  | 2  | 2  | 4  | 4  |    |    |    |    |    |

|                                         |                 |               |      |     |     |     |    |     |     |    |    |    |     |    |    |    |     |     |    |    |    |    |     |    |     |     |     |      |     |     |    |    |    |   |
|-----------------------------------------|-----------------|---------------|------|-----|-----|-----|----|-----|-----|----|----|----|-----|----|----|----|-----|-----|----|----|----|----|-----|----|-----|-----|-----|------|-----|-----|----|----|----|---|
| ENSP00000348580_L64F                    | ENSG00000196656 | RPS26P54, RPS | 44   | 2   | 2   | 2   | 0  | 3   | 2   | 1  | 2  | 1  | 1   | 1  | 1  | 2  | 1   | 1   | 0  | 1  | 2  | 1  | 2   | 1  | 4   | 1   | 4   | 0    | 0   | 2   | 0  | 2  | 2  |   |
| ENSP00000348582_ENSP000                 | ENSG00000144747 | TDMF1         | 125  | 8   | 8   | 3   | 3  | 3   | 1   | 3  | 6  | 2  | 3   | 2  | 2  | 1  | 3   | 8   | 2  | 0  | 2  | 8  | 11  | 5  | 9   | 8   | 3   | 4    | 2   | 1   | 4  | 5  | 5  |   |
| ENSP00000348596_ENSP000                 | ENSG00000198301 | SAD01         | 98   | 4   | 3   | 2   | 4  | 1   | 0   | 5  | 1  | 1  | 5   | 5  | 3  | 5  | 3   | 2   | 3  | 4  | 3  | 5  | 5   | 3  | 4   | 7   | 2   | 3    | 2   | 2   | 5  | 4  | 2  |   |
| ENSP00000348610_ENSP000                 | ENSG00000008838 | MD24          | 31   | 2   | 0   | 1   | 1  | 0   | 0   | 1  | 0  | 0  | 3   | 1  | 3  | 1  | 0   | 0   | 1  | 1  | 0  | 2  | 3   | 0  | 3   | 1   | 2   | 1    | 2   | 1   | 0  | 0  | 1  |   |
| ENSP00000348632                         | ENSG00000125826 | RBCK1         | 30   | 0   | 0   | 0   | 3  | 5   | 1   | 0  | 0  | 0  | 0   | 0  | 0  | 1  | 2   | 1   | 6  | 2  | 2  | 0  | 1   | 0  | 0   | 0   | 2   | 0    | 1   | 1   | 1  | 1  | 0  |   |
| ENSP00000348657_ENSP000                 | ENSG00000146918 | NCAPG2        | 35   | 4   | 0   | 0   | 2  | 0   | 0   | 2  | 0  | 0  | 2   | 0  | 0  | 2  | 1   | 3   | 1  | 1  | 4  | 2  | 2   | 1  | 2   | 1   | 1   | 2    | 0   | 0   | 0  | 0  | 2  |   |
| ENSP00000348668_ENSP000                 | ENSG00000139629 | GALTn6        | 27   | 3   | 2   | 2   | 1  | 3   | 2   | 0  | 0  | 0  | 1   | 1  | 2  | 2  | 1   | 2   | 0  | 0  | 0  | 0  | 0   | 0  | 0   | 0   | 0   | 1    | 0   | 0   | 1  | 1  | 2  |   |
| ENSP00000348673                         | ENSG00000198146 | ZNF770        | 12   | 0   | 0   | 0   | 0  | 0   | 0   | 1  | 0  | 0  | 3   | 1  | 1  | 0  | 0   | 0   | 0  | 0  | 1  | 0  | 0   | 0  | 0   | 0   | 1   | 2    | 1   | 1   | 0  | 0  | 0  |   |
| ENSP00000348697_ENSP000                 | ENSG00000197535 | MYOSA         | 44   | 0   | 0   | 0   | 3  | 0   | 1   | 0  | 0  | 0  | 1   | 0  | 1  | 3  | 0   | 2   | 1  | 0  | 2  | 2  | 7   | 2  | 4   | 0   | 1   | 2    | 1   | 1   | 5  | 1  | 4  |   |
| ENSP00000348722                         | ENSG00000091127 | PUS7          | 422  | 6   | 2   | 5   | 11 | 15  | 15  | 18 | 9  | 15 | 21  | 5  | 16 | 11 | 3   | 13  | 17 | 18 | 19 | 17 | 13  | 14 | 15  | 4   | 9   | 20   | 13  | 14  | 42 | 18 | 24 |   |
| ENSP00000348762_rs22545:ENSG00000160285 | LSS             | 184           | 5    | 7   | 4   | 4   | 5  | 3   | 7   | 4  | 7  | 12 | 1   | 5  | 8  | 3  | 9   | 7   | 13 | 11 | 6  | 9  | 7   | 6  | 9   | 8   | 6   | 8    | 7   | 9   | 10 | 4  |    |   |
| ENSP00000348762_rs22545:ENSG00000160285 | LSS             | 212           | 12   | 11  | 8   | 11  | 16 | 8   | 6   | 5  | 7  | 5  | 0   | 6  | 12 | 6  | 6   | 3   | 0  | 4  | 10 | 10 | 10  | 3  | 4   | 3   | 13  | 19   | 10  | 0   | 3  | 1  |    |   |
| ENSP00000348775_ENSP000                 | ENSG00000087008 | ACOX3         | 47   | 0   | 0   | 2   | 1  | 2   | 1   | 1  | 0  | 0  | 0   | 1  | 2  | 0  | 0   | 0   | 2  | 1  | 1  | 0  | 0   | 0  | 7   | 2   | 7   | 5    | 1   | 4   | 1  | 2  | 4  |   |
| ENSP00000348784_ENSP000                 | ENSG00000089289 | IGBP1,C14orf1 | 80   | 2   | 6   | 2   | 3  | 8   | 3   | 2  | 3  | 2  | 3   | 2  | 1  | 2  | 1   | 2   | 2  | 6  | 2  | 3  | 4   | 1  | 0   | 3   | 0   | 3    | 4   | 1   | 3  | 4  | 2  |   |
| ENSP00000348786_S83C_EN                 | ENSG00000116473 | RAP1A         | 85   | 5   | 2   | 1   | 2  | 1   | 2   | 3  | 1  | 3  | 6   | 0  | 2  | 3  | 1   | 2   | 3  | 2  | 2  | 2  | 1   | 5  | 6   | 2   | 4   | 5    | 5   | 1   | 7  | 2  | 4  |   |
| ENSP00000348809                         | ENSG00000103152 | MPG           | 58   | 1   | 4   | 2   | 0  | 1   | 1   | 2  | 0  | 2  | 0   | 1  | 0  | 1  | 2   | 3   | 1  | 0  | 1  | 4  | 4   | 2  | 2   | 3   | 4   | 3    | 4   | 3   | 3  | 2  | 2  |   |
| ENSP00000348838                         | ENSG00000104555 | UBE2C         | 37   | 4   | 4   | 4   | 1  | 1   | 1   | 1  | 0  | 1  | 0   | 0  | 1  | 1  | 2   | 2   | 1  | 0  | 1  | 1  | 3   | 1  | 1   | 0   | 0   | 1    | 1   | 0   | 1  | 2  | 1  |   |
| ENSP00000348877_ENSP000                 | ENSG00000105220 | GPI           | 549  | 17  | 13  | 18  | 11 | 17  | 16  | 15 | 12 | 25 | 16  | 5  | 7  | 16 | 11  | 21  | 11 | 20 | 21 | 21 | 25  | 20 | 11  | 12  | 13  | 24   | 32  | 34  | 30 | 28 | 27 |   |
| ENSP00000348877_rs81913:ENSG00000105220 | GPI             | 526           | 15   | 13  | 17  | 11  | 17 | 15  | 15  | 12 | 24 | 17 | 5   | 8  | 14 | 11 | 20  | 10  | 20 | 20 | 21 | 24 | 19  | 10 | 12  | 12  | 23  | 30   | 32  | 28  | 26 | 25 |    |   |
| ENSP00000348886                         | ENSG00000165283 | STOML2        | 376  | 21  | 11  | 12  | 8  | 9   | 7   | 7  | 7  | 12 | 21  | 9  | 18 | 7  | 4   | 10  | 7  | 13 | 12 | 13 | 16  | 11 | 15  | 14  | 17  | 16   | 11  | 11  | 26 | 15 | 16 |   |
| ENSP00000348888_ENSP000                 | ENSG00000162896 | PIGR          | 166  | 0   | 0   | 0   | 0  | 0   | 1   | 0  | 0  | 0  | 0   | 0  | 0  | 0  | 0   | 0   | 0  | 0  | 0  | 0  | 0   | 0  | 0   | 0   | 68  | 58   | 39  | 0   | 0  | 0  |    |   |
| ENSP00000348889                         | ENSG00000197043 | ANXA6         | 402  | 33  | 33  | 28  | 10 | 17  | 17  | 0  | 1  | 34 | 10  | 20 | 7  | 9  | 15  | 13  | 22 | 13 | 14 | 13 | 11  | 3  | 0   | 0   | 0   | 0    | 0   | 30  | 21 | 27 |    |   |
| ENSP00000348901_ENSP000                 | ENSG00000105223 | PLD3          | 30   | 2   | 2   | 1   | 1  | 0   | 0   | 3  | 2  | 0  | 1   | 1  | 1  | 1  | 1   | 1   | 2  | 2  | 3  | 1  | 0   | 1  | 0   | 0   | 1   | 0    | 1   | 0   | 0  | 0  | 1  |   |
| ENSP00000348932                         | ENSG00000184007 | PTP4A2        | 10   | 2   | 0   | 1   | 1  | 0   | 2   | 1  | 0  | 0  | 0   | 0  | 0  | 0  | 0   | 0   | 0  | 1  | 1  | 0  | 0   | 1  | 0   | 0   | 0   | 0    | 0   | 0   | 0  | 0  | 0  |   |
| ENSP00000348933_ENSP000                 | ENSG00000147419 | CDC25         | 40   | 3   | 0   | 1   | 3  | 2   | 2   | 2  | 0  | 0  | 1   | 0  | 1  | 1  | 1   | 1   | 2  | 3  | 2  | 1  | 1   | 1  | 1   | 0   | 1   | 2    | 0   | 3   | 2  | 0  | 3  |   |
| ENSP00000348959_ENSP000                 | ENSG00000119812 | MAN1A2        | 16   | 0   | 0   | 1   | 2  | 0   | 0   | 0  | 1  | 1  | 0   | 0  | 0  | 1  | 0   | 2   | 1  | 0  | 1  | 0  | 0   | 1  | 1   | 0   | 2   | 1    | 0   | 0   | 0  | 0  | 1  |   |
| ENSP00000348965_R22435                  | ENSG00000197102 | DYNC1H1       | 1872 | 83  | 58  | 63  | 44 | 35  | 43  | 51 | 41 | 46 | 77  | 17 | 37 | 60 | 42  | 82  | 52 | 74 | 72 | 69 | 91  | 97 | 84  | 36  | 43  | 67   | 52  | 100 | 76 | 86 |    |   |
| ENSP00000349016                         | ENSG00000142655 | PXCL1         | 10   | 0   | 0   | 0   | 0  | 0   | 0   | 1  | 2  | 0  | 0   | 1  | 0  | 0  | 0   | 0   | 0  | 0  | 1  | 0  | 1   | 0  | 0   | 1   | 1   | 1    | 0   | 1   | 0  | 0  | 0  |   |
| ENSP00000349053_ENSP000                 | ENSG00000089597 | GNA8          | 1011 | 54  | 40  | 35  | 25 | 42  | 23  | 40 | 27 | 42 | 33  | 16 | 29 | 28 | 27  | 33  | 28 | 39 | 30 | 39 | 50  | 38 | 50  | 37  | 28  | 39   | 28  | 26  | 27 | 29 | 29 |   |
| ENSP00000349078_ENSP000                 | ENSG00000160752 | FDPS          | 265  | 15  | 6   | 8   | 13 | 13  | 10  | 7  | 2  | 7  | 7   | 3  | 6  | 5  | 10  | 7   | 4  | 6  | 7  | 13 | 9   | 11 | 6   | 5   | 4   | 22   | 23  | 16  | 6  | 7  | 7  |   |
| ENSP00000349096_ENSP000                 | ENSG00000198001 | IRAK4         | 11   | 0   | 0   | 0   | 2  | 1   | 0   | 1  | 0  | 1  | 0   | 0  | 0  | 0  | 1   | 1   | 0  | 0  | 0  | 0  | 2   | 0  | 0   | 0   | 0   | 0    | 0   | 0   | 0  | 0  | 0  | 1 |
| ENSP00000349101                         | ENSG00000122566 | HNRNP2A81     | 1669 | 58  | 34  | 46  | 62 | 54  | 46  | 78 | 42 | 51 | 90  | 38 | 58 | 36 | 22  | 49  | 45 | 81 | 49 | 73 | 57  | 48 | 82  | 54  | 66  | 68   | 58  | 49  | 71 | 56 | 48 |   |
| ENSP00000349140_ENSP000                 | ENSG00000105887 | MTFN          | 213  | 7   | 11  | 4   | 10 | 12  | 5   | 7  | 6  | 6  | 6   | 6  | 2  | 3  | 8   | 4   | 7  | 9  | 6  | 8  | 11  | 6  | 3   | 8   | 4   | 6    | 8   | 6   | 9  | 17 | 8  |   |
| ENSP00000349142                         | ENSG00000165629 | ATPCS1        | 227  | 12  | 4   | 10  | 5  | 5   | 10  | 10 | 1  | 6  | 10  | 2  | 10 | 5  | 1   | 9   | 6  | 6  | 10 | 7  | 8   | 9  | 12  | 4   | 10  | 11   | 7   | 10  | 10 | 6  | 11 |   |
| ENSP00000349168_ENSP000                 | ENSG00000169045 | HNRNPH1       | 764  | 31  | 21  | 21  | 13 | 25  | 19  | 18 | 14 | 22 | 54  | 17 | 21 | 28 | 18  | 29  | 21 | 24 | 25 | 25 | 24  | 29 | 46  | 20  | 36  | 31   | 33  | 15  | 39 | 24 | 21 |   |
| ENSP00000349205_ENSP000                 | ENSG00000196455 | PIK3RA        | 42   | 4   | 0   | 0   | 3  | 2   | 2   | 3  | 0  | 0  | 0   | 0  | 2  | 5  | 0   | 0   | 1  | 0  | 2  | 4  | 5   | 2  | 0   | 0   | 1   | 0    | 1   | 1   | 2  | 1  | 0  | 1 |
| ENSP00000349212                         | ENSG00000196531 | NACA          | 421  | 21  | 17  | 11  | 16 | 15  | 9   | 14 | 7  | 10 | 13  | 8  | 7  | 13 | 14  | 14  | 19 | 22 | 16 | 17 | 13  | 13 | 12  | 11  | 7   | 26   | 15  | 11  | 18 | 15 | 17 |   |
| ENSP00000349259_ENSP000                 | ENSG00000115306 | SPTB1         | 3115 | 178 | 138 | 122 | 91 | 127 | 103 | 89 | 75 | 76 | 129 | 75 | 83 | 95 | 113 | 140 | 35 | 55 | 51 | 86 | 122 | 88 | 128 | 100 | 100 | 227  | 205 | 128 | 44 | 57 | 55 |   |
| ENSP00000349268_ENSP000                 | ENSG00000153936 | HS2ST1        | 15   | 2   | 0   | 1   | 0  | 0   | 0   | 2  | 1  | 2  | 2   | 0  | 0  | 0  | 0   | 0   | 1  | 0  | 0  | 0  | 0   | 0  | 0   | 0   | 1   | 2    | 0   | 0   | 1  | 0  | 0  | 0 |
| ENSP00000349305                         | ENSG00000144674 | GOLGA4        | 203  | 16  | 14  | 7   | 3  | 3   | 4   | 4  | 4  | 7  | 5   | 3  | 6  | 7  | 6   | 13  | 9  | 9  | 9  | 11 | 7   | 5  | 2   | 3   | 12  | 9    | 0   | 3   | 6  | 7  | 5  |   |
| ENSP00000349321_G414D                   | ENSG00000105576 | TNPO2         | 110  | 7   | 4   | 4   | 3  | 4   | 3   | 2  | 1  | 1  | 4   | 0  | 0  | 3  | 3   | 3   | 2  | 5  | 6  | 5  | 7   | 4  | 3   | 2   | 2   | 1    | 6   | 3   | 4  | 8  | 5  | 5 |
| ENSP00000349351                         | ENSG00000185963 | BICL2         | 19   | 0   | 0   | 1   | 0  | 0   | 0   | 0  | 0  | 2  | 0   | 0  | 0  | 1  | 0   | 0   | 0  | 2  | 0  | 0  | 1   | 1  | 1   | 0   | 0   | 0    | 0   | 0   | 0  | 4  | 4  |   |
| ENSP00000349356_ENSP000                 | ENSG00000132436 | FIGL1         | 23   | 0   | 0   | 2   | 2  | 1   | 0   | 1  | 1  | 1  | 1   | 1  | 0  | 0  | 0   | 2   | 1  | 4  | 0  | 0  | 0   | 0  | 0   | 0   | 0   | 1    | 1   | 1   | 0  | 0  | 2  |   |
| ENSP00000349358                         | ENSG00000133641 | C12orf29      | 45   | 2   | 1   | 1   | 2  | 1   | 1   | 1  | 1  | 0  | 0   | 2  | 1  | 2  | 2   | 2   | 3  | 2  | 3  | 4  | 3   | 1  | 2   | 2   | 0   | 1    | 3   | 0   | 0  | 1  | 1  |   |
| ENSP00000349386_ENSP000                 | ENSG00000075151 | E1F4G3        | 25   | 1   | 0   | 1   | 2  | 1   | 0   | 1  | 0  | 1  | 0   | 0  | 0  | 1  | 0   | 1   | 0  | 2  | 1  | 1  | 4   | 3  | 1   | 0   | 0   | 0    | 2   | 0   | 0  | 0  | 2  |   |
| ENSP00000349391_I80Y3_I8                | ENSG00000188219 | POTEE         | 560  | 34  | 11  | 45  | 9  | 7   | 8   | 6  | 1  | 19 | 80  | 1  | 10 | 10 | 0   | 14  | 17 | 9  | 16 | 10 | 12  | 24 | 36  | 1   | 21  | 72   | 15  | 16  | 31 | 7  | 18 |   |
| ENSP00000349415                         | ENSG00000099246 | RAB18         | 86   | 7   | 3   | 9   | 2  | 2   | 2   | 1  | 2  | 2  | 2   | 1  | 2  | 4  | 1   | 3   | 2  | 2  | 3  | 2  | 4   | 3  | 3   | 3   | 3   | 3    | 3   | 2   | 4  | 3  | 3  |   |
| ENSP00000349437_ENSP000                 | ENSG00000197081 | IGF2R         | 306  | 10  | 10  | 8   | 5  | 9   | 6   | 8  | 8  | 7  | 19  | 12 | 10 | 11 | 8   | 11  | 8  | 17 | 11 | 19 | 22  | 14 | 5   | 4   | 6   | 18   | 21  | 8   | 5  | 3  | 3  |   |
| ENSP00000349456_ENSP000                 | ENSG00000121940 | CLCC1         | 63   | 1   | 1   | 3   | 0  | 0   | 0   | 5  | 3  | 1  | 0   | 1  | 1  | 3  | 2   | 3   | 0  | 1  | 1  | 5  | 4   | 6  | 0   | 1   | 0   | 4    | 5   | 2   | 2  | 5  | 3  |   |
| ENSP00000349467_rs11541:ENSG00000198668 | CALM1           | 742           | 43   | 19  | 24  | 17  | 20 | 22  | 23  | 27 | 23 | 31 | 8   | 15 | 21 | 17 | 31  | 21  | 27 | 20 | 27 | 27 | 26  | 31 | 16  | 20  | 41  | 33</ |     |     |    |    |    |   |

|                                                                   |          |     |    |    |    |    |    |    |    |    |    |    |    |    |    |    |    |    |    |    |    |    |    |    |    |    |    |    |    |    |    |    |   |
|-------------------------------------------------------------------|----------|-----|----|----|----|----|----|----|----|----|----|----|----|----|----|----|----|----|----|----|----|----|----|----|----|----|----|----|----|----|----|----|---|
| ENSP00000350787,ENSP00000350787,ENSP00000350787                   | THOC5    | 82  | 3  | 1  | 3  | 3  | 0  | 4  | 4  | 2  | 1  | 6  | 4  | 4  | 3  | 1  | 4  | 0  | 0  | 3  | 3  | 1  | 6  | 5  | 1  | 4  | 3  | 3  | 2  | 1  | 2  | 5  |   |
| ENSP00000350820,ENSP00000350820,ENSP00000350820                   | MTFAP    | 43  | 2  | 1  | 0  | 0  | 0  | 1  | 2  | 1  | 1  | 2  | 0  | 2  | 2  | 0  | 0  | 1  | 1  | 2  | 1  | 2  | 1  | 2  | 2  | 1  | 4  | 1  | 2  | 6  | 1  | 2  |   |
| ENSP00000350848,ENSP00000350848,ENSP00000350848                   | NSBP1    | 69  | 0  | 0  | 0  | 1  | 3  | 2  | 1  | 3  | 0  | 1  | 1  | 1  | 1  | 1  | 2  | 0  | 1  | 2  | 3  | 3  | 3  | 0  | 0  | 10 | 9  | 5  | 7  | 6  | 3  |    |   |
| ENSP00000350874,ENSP00000350874,ENSP00000350874                   | MTTL9    | 14  | 0  | 0  | 0  | 1  | 2  | 0  | 1  | 0  | 0  | 1  | 2  | 1  | 0  | 2  | 0  | 0  | 0  | 0  | 0  | 1  | 0  | 1  | 0  | 1  | 0  | 0  | 0  | 1  | 0  |    |   |
| ENSP00000350894,ENSP00000350894,ENSP00000350894                   | SERPINH1 | 370 | 44 | 30 | 35 | 3  | 1  | 3  | 7  | 5  | 9  | 18 | 5  | 10 | 8  | 4  | 8  | 8  | 14 | 11 | 16 | 12 | 15 | 18 | 8  | 10 | 11 | 7  | 7  | 19 | 9  | 15 |   |
| ENSP00000350896,ENSP00000350896,ENSP00000350896                   | EPHB4    | 57  | 2  | 1  | 1  | 1  | 2  | 0  | 4  | 2  | 3  | 0  | 2  | 0  | 3  | 2  | 2  | 2  | 3  | 1  | 4  | 0  | 1  | 0  | 2  | 0  | 6  | 5  | 4  | 0  | 2  | 2  |   |
| ENSP00000350914,ENSP00000350914,ENSP00000350914                   | BDH1     | 148 | 2  | 1  | 2  | 7  | 9  | 6  | 9  | 4  | 5  | 3  | 2  | 4  | 3  | 0  | 2  | 4  | 4  | 4  | 8  | 8  | 8  | 7  | 1  | 3  | 10 | 8  | 9  | 7  | 5  | 3  |   |
| ENSP00000350934,ENSP00000350934,ENSP00000350934                   | RABEP2   | 51  | 1  | 0  | 1  | 0  | 0  | 1  | 2  | 0  | 1  | 2  | 1  | 0  | 2  | 4  | 3  | 1  | 1  | 1  | 6  | 5  | 1  | 0  | 1  | 0  | 3  | 3  | 3  | 4  | 1  | 3  |   |
| ENSP00000350941,ENSP00000350941,ENSP00000350941                   | NSBP1    | 106 | 6  | 4  | 2  | 4  | 9  | 5  | 6  | 7  | 8  | 2  | 1  | 1  | 2  | 3  | 1  | 2  | 4  | 1  | 6  | 4  | 3  | 3  | 4  | 1  | 4  | 5  | 2  | 2  | 3  | 1  |   |
| ENSP00000350948,ENSP00000350948,ENSP00000350948                   | DNM1L    | 222 | 13 | 12 | 8  | 4  | 7  | 4  | 6  | 9  | 5  | 7  | 1  | 1  | 6  | 4  | 4  | 10 | 12 | 7  | 5  | 7  | 7  | 15 | 5  | 5  | 11 | 6  | 5  | 13 | 12 | 11 |   |
| ENSP00000350990,ENSP00000350990,ENSP00000350990                   | TNKS1BP1 | 321 | 19 | 17 | 9  | 7  | 7  | 8  | 25 | 24 | 29 | 15 | 10 | 2  | 5  | 13 | 11 | 4  | 12 | 3  | 16 | 26 | 13 | 5  | 3  | 1  | 8  | 9  | 3  | 8  | 6  | 3  |   |
| ENSP00000351035,ENSP00000351035,ENSP00000351035                   | HSD17B11 | 79  | 3  | 2  | 3  | 2  | 4  | 4  | 1  | 2  | 2  | 2  | 0  | 3  | 3  | 0  | 3  | 3  | 2  | 3  | 2  | 1  | 2  | 4  | 1  | 4  | 5  | 6  | 4  | 2  | 3  | 3  |   |
| ENSP00000351049,ENSP00000351049,ENSP00000351049                   | PAK4     | 22  | 2  | 1  | 1  | 1  | 0  | 1  | 3  | 1  | 2  | 0  | 0  | 0  | 0  | 0  | 0  | 1  | 1  | 1  | 2  | 1  | 0  | 0  | 0  | 0  | 1  | 0  | 1  | 1  | 1  | 1  |   |
| ENSP00000351052,rs11556:ENSP000000091732                          | ZC3HC1   | 51  | 3  | 4  | 2  | 0  | 1  | 1  | 0  | 1  | 1  | 2  | 2  | 1  | 0  | 2  | 4  | 1  | 3  | 0  | 2  | 0  | 2  | 3  | 5  | 3  | 1  | 2  | 3  | 0  | 1  | 1  |   |
| ENSP00000351100,rs25302:ENSP000000120314                          | WDR55    | 55  | 4  | 1  | 4  | 2  | 3  | 1  | 4  | 1  | 2  | 1  | 1  | 2  | 1  | 1  | 2  | 2  | 1  | 2  | 2  | 1  | 2  | 0  | 2  | 3  | 0  | 1  | 2  | 3  | 1  | 3  |   |
| ENSP00000351102,ENSP00000351102,ENSP00000351102                   | CEP55    | 10  | 0  | 0  | 1  | 0  | 1  | 0  | 0  | 0  | 0  | 0  | 0  | 0  | 1  | 0  | 2  | 0  | 1  | 1  | 1  | 1  | 2  | 0  | 0  | 0  | 1  | 0  | 0  | 0  | 0  | 0  |   |
| ENSP00000351126,ENSP00000351126,ENSP00000351126                   | XPDP2    | 65  | 3  | 5  | 0  | 5  | 4  | 2  | 4  | 2  | 0  | 0  | 1  | 1  | 4  | 2  | 1  | 2  | 1  | 2  | 2  | 2  | 0  | 3  | 5  | 0  | 3  | 5  | 1  | 0  | 3  | 2  |   |
| ENSP00000351137,ENSP00000351137,ENSP00000351137                   | HAB2     | 183 | 10 | 5  | 6  | 8  | 4  | 3  | 6  | 7  | 7  | 6  | 3  | 8  | 2  | 4  | 5  | 1  | 6  | 4  | 5  | 10 | 7  | 9  | 7  | 5  | 7  | 8  | 5  | 8  | 10 | 7  |   |
| ENSP00000351141,ENSP00000351141,ENSP00000351141                   | WTAP     | 102 | 5  | 4  | 6  | 4  | 2  | 3  | 3  | 3  | 2  | 3  | 3  | 2  | 4  | 3  | 6  | 1  | 3  | 2  | 3  | 6  | 3  | 6  | 6  | 2  | 3  | 2  | 2  | 2  | 5  | 3  |   |
| ENSP00000351148,ENSP00000351148,ENSP00000351148                   | MUC5AC   | 14  | 0  | 0  | 0  | 0  | 0  | 0  | 3  | 0  | 2  | 0  | 0  | 0  | 0  | 0  | 0  | 0  | 0  | 0  | 0  | 0  | 0  | 0  | 0  | 0  | 3  | 5  | 1  | 0  | 0  | 0  |   |
| ENSP00000351157,ENSP00000351157,ENSP00000351157                   | TXNDC15  | 17  | 2  | 0  | 0  | 1  | 0  | 0  | 1  | 0  | 1  | 0  | 1  | 0  | 0  | 1  | 0  | 2  | 0  | 1  | 0  | 1  | 1  | 0  | 1  | 1  | 1  | 1  | 0  | 0  | 1  | 1  | 0 |
| ENSP00000351170,ENSP00000351170,ENSP00000351170                   | GDA      | 112 | 1  | 0  | 1  | 3  | 3  | 1  | 7  | 8  | 12 | 0  | 0  | 0  | 6  | 3  | 6  | 7  | 8  | 7  | 4  | 2  | 1  | 8  | 3  | 6  | 6  | 3  | 4  | 0  | 0  | 2  |   |
| ENSP00000351175,ENSP00000351175,ENSP00000351175                   | MAX      | 25  | 1  | 1  | 1  | 1  | 2  | 1  | 0  | 1  | 0  | 1  | 2  | 0  | 1  | 2  | 1  | 0  | 0  | 1  | 1  | 1  | 1  | 1  | 1  | 0  | 0  | 1  | 0  | 1  | 1  | 1  | 1 |
| ENSP00000351177_A890V,ENSP00000351177_A890V,ENSP00000351177_A890V | LDNP1    | 645 | 20 | 16 | 18 | 11 | 13 | 11 | 18 | 7  | 7  | 29 | 12 | 21 | 13 | 10 | 16 | 23 | 29 | 24 | 22 | 19 | 16 | 51 | 28 | 37 | 40 | 34 | 29 | 32 | 26 | 13 |   |
| ENSP00000351177_rs10623:ENSP000000196365                          | LDNP1    | 648 | 20 | 16 | 18 | 11 | 13 | 11 | 18 | 7  | 8  | 30 | 12 | 21 | 13 | 10 | 16 | 22 | 29 | 24 | 21 | 19 | 16 | 51 | 28 | 39 | 40 | 34 | 30 | 32 | 26 | 13 |   |
| ENSP00000351185,ENSP00000351185,ENSP00000351185                   | DNA2     | 13  | 3  | 1  | 0  | 0  | 0  | 0  | 0  | 0  | 2  | 0  | 0  | 1  | 1  | 0  | 0  | 0  | 0  | 0  | 1  | 3  | 0  | 0  | 0  | 0  | 0  | 0  | 1  | 0  | 0  | 0  | 0 |
| ENSP00000351207,ENSP00000351207,ENSP00000351207                   | NSBP1    | 57  | 5  | 2  | 1  | 4  | 5  | 1  | 0  | 0  | 0  | 1  | 0  | 2  | 0  | 2  | 1  | 1  | 1  | 3  | 2  | 0  | 1  | 6  | 4  | 2  | 4  | 2  | 4  | 1  | 2  | 0  | 0 |
| ENSP00000351209,ENSP00000351209,ENSP00000351209                   | EPHA2    | 255 | 3  | 4  | 0  | 5  | 2  | 3  | 8  | 10 | 9  | 15 | 13 | 11 | 5  | 7  | 5  | 10 | 14 | 11 | 5  | 3  | 7  | 17 | 16 | 10 | 4  | 3  | 5  | 22 | 13 | 15 |   |
| ENSP00000351214,ENSP00000351214,ENSP00000351214                   | TOMM7    | 14  | 0  | 0  | 2  | 0  | 0  | 1  | 0  | 0  | 0  | 0  | 0  | 0  | 0  | 0  | 0  | 0  | 0  | 0  | 1  | 0  | 0  | 1  | 0  | 0  | 0  | 1  | 0  | 4  | 1  | 0  | 1 |
| ENSP00000351250,ENSP00000351250,ENSP00000351250                   | TRIM33   | 49  | 2  | 1  | 0  | 3  | 1  | 0  | 3  | 0  | 2  | 0  | 0  | 0  | 0  | 2  | 3  | 2  | 4  | 3  | 1  | 3  | 3  | 4  | 3  | 2  | 0  | 0  | 0  | 1  | 3  | 3  |   |
| ENSP00000351287,ENSP00000351287,ENSP00000351287                   | DAAM1    | 25  | 1  | 2  | 2  | 2  | 1  | 1  | 0  | 2  | 1  | 0  | 1  | 0  | 0  | 1  | 0  | 0  | 0  | 0  | 1  | 2  | 1  | 0  | 1  | 0  | 1  | 2  | 1  | 1  | 1  | 0  | 0 |
| ENSP00000351288,ENSP00000351288,ENSP00000351288                   | PKFB3    | 49  | 3  | 2  | 0  | 5  | 5  | 2  | 1  | 0  | 1  | 1  | 0  | 0  | 2  | 0  | 1  | 2  | 1  | 2  | 3  | 1  | 1  | 3  | 1  | 0  | 3  | 3  | 1  | 1  | 2  | 2  | 0 |
| ENSP00000351298,ENSP00000351298,ENSP00000351298                   | PPI1CB   | 219 | 11 | 4  | 7  | 2  | 3  | 11 | 5  | 3  | 8  | 18 | 1  | 8  | 6  | 3  | 10 | 8  | 4  | 12 | 1  | 6  | 14 | 8  | 1  | 8  | 14 | 6  | 10 | 14 | 2  | 11 | 0 |
| ENSP00000351314,ENSP00000351314,ENSP00000351314                   | PSMB10   | 15  | 1  | 0  | 0  | 1  | 0  | 1  | 2  | 1  | 2  | 2  | 0  | 0  | 0  | 0  | 0  | 0  | 0  | 0  | 0  | 0  | 0  | 0  | 0  | 2  | 3  | 0  | 0  | 0  | 0  | 0  | 0 |
| ENSP00000351352,ENSP00000351352,ENSP00000351352                   | SIPA1L1  | 39  | 2  | 0  | 0  | 0  | 0  | 1  | 1  | 1  | 0  | 0  | 0  | 1  | 0  | 4  | 2  | 7  | 1  | 0  | 1  | 5  | 3  | 2  | 0  | 2  | 1  | 0  | 1  | 0  | 3  | 0  | 1 |
| ENSP00000351380,ENSP00000351380,ENSP00000351380                   | C4orf43  | 26  | 0  | 0  | 1  | 0  | 1  | 0  | 1  | 1  | 0  | 1  | 1  | 0  | 0  | 1  | 2  | 0  | 0  | 0  | 2  | 1  | 3  | 1  | 2  | 1  | 1  | 2  | 1  | 2  | 1  | 2  | 0 |
| ENSP00000351410,ENSP00000351410,ENSP00000351410                   | PRKRI1A  | 129 | 6  | 4  | 3  | 5  | 2  | 2  | 2  | 2  | 2  | 4  | 1  | 3  | 2  | 2  | 6  | 9  | 4  | 6  | 5  | 8  | 8  | 12 | 7  | 9  | 3  | 1  | 2  | 3  | 2  | 4  | 0 |
| ENSP00000351416,ENSP00000351416,ENSP00000351416                   | ANKRD17  | 205 | 10 | 8  | 8  | 8  | 5  | 5  | 8  | 5  | 4  | 1  | 2  | 2  | 5  | 6  | 7  | 10 | 5  | 8  | 12 | 10 | 7  | 9  | 7  | 2  | 8  | 5  | 5  | 11 | 11 | 11 | 0 |
| ENSP00000351446,ENSP00000351446,ENSP00000351446                   | WDR5     | 121 | 7  | 5  | 1  | 4  | 5  | 3  | 3  | 3  | 2  | 6  | 7  | 3  | 5  | 6  | 3  | 5  | 7  | 3  | 3  | 6  | 4  | 4  | 3  | 2  | 4  | 4  | 1  | 4  | 5  | 3  | 0 |
| ENSP00000351492,ENSP00000351492,ENSP00000351492                   | UBL5     | 58  | 2  | 4  | 2  | 4  | 4  | 1  | 2  | 0  | 1  | 0  | 1  | 1  | 3  | 1  | 0  | 3  | 2  | 3  | 4  | 1  | 3  | 2  | 3  | 0  | 1  | 1  | 1  | 3  | 3  | 2  | 0 |
| ENSP00000351503,ENSP00000351503,ENSP00000351503                   | NSBP1    | 48  | 2  | 3  | 4  | 2  | 4  | 1  | 3  | 1  | 2  | 4  | 2  | 0  | 2  | 1  | 1  | 2  | 0  | 2  | 1  | 1  | 0  | 2  | 1  | 0  | 1  | 1  | 2  | 2  | 1  | 0  | 0 |
| ENSP00000351509,ENSP00000351509,ENSP00000351509                   | EXT2     | 11  | 1  | 1  | 1  | 1  | 0  | 1  | 1  | 0  | 0  | 0  | 0  | 0  | 0  | 1  | 0  | 0  | 0  | 0  | 1  | 0  | 0  | 0  | 1  | 0  | 0  | 1  | 0  | 0  | 0  | 0  | 0 |
| ENSP00000351524,ENSP00000351524,ENSP00000351524                   | HELZ     | 13  | 0  | 0  | 0  | 2  | 0  | 2  | 0  | 1  | 0  | 1  | 0  | 0  | 0  | 0  | 0  | 1  | 1  | 0  | 0  | 1  | 0  | 0  | 0  | 0  | 1  | 0  | 1  | 0  | 1  | 0  | 1 |
| ENSP00000351527_1782V,ENSP00000351527_1782V,ENSP00000351527_1782V | TNND1P   | 442 | 24 | 17 | 22 | 12 | 15 | 17 | 21 | 7  | 22 | 7  | 6  | 7  | 14 | 10 | 18 | 14 | 23 | 14 | 16 | 14 | 19 | 16 | 14 | 16 | 19 | 21 | 20 | 5  | 7  | 5  | 0 |
| ENSP00000351536,ENSP00000351536,ENSP00000351536                   | QSOX2    | 32  | 0  | 0  | 2  | 1  | 1  | 0  | 3  | 1  | 2  | 1  | 1  | 1  | 1  | 1  | 3  | 1  | 0  | 0  | 2  | 0  | 1  | 1  | 1  | 0  | 1  | 0  | 1  | 2  | 2  | 2  | 0 |
| ENSP00000351543,ENSP00000351543,ENSP00000351543                   | NSBP1    | 134 | 7  | 4  | 6  | 0  | 4  | 6  | 2  | 2  | 4  | 6  | 0  | 2  | 3  | 4  | 7  | 4  | 5  | 3  | 4  | 3  | 5  | 4  | 5  | 7  | 9  | 8  | 6  | 5  | 6  | 5  | 6 |
| ENSP00000351546,ENSP00000351546,ENSP00000351546                   | UCK1     | 13  | 2  | 0  | 2  | 2  | 0  | 0  | 1  | 0  | 0  | 0  | 0  | 0  | 0  | 0  | 0  | 0  | 1  | 0  | 2  | 0  | 0  | 0  | 0  | 0  | 0  | 0  | 1  | 1  | 0  | 1  | 0 |
| ENSP00000351575,ENSP00000351575,ENSP00000351575                   | BDP1     | 18  | 0  | 0  | 1  | 0  | 0  | 0  | 1  | 1  | 1  | 2  | 0  | 2  | 0  | 2  | 0  | 0  | 2  | 0  | 0  | 1  | 0  | 0  | 0  | 0  | 1  | 0  | 1  | 2  | 1  | 0  | 0 |
| ENSP00000351596_rs23036:ENSP000000198677                          | TTCT3    | 72  | 10 | 4  | 7  | 6  | 5  | 11 | 4  | 6  | 6  | 4  | 0  | 1  | 1  | 0  | 1  | 0  | 0  | 0  | 0  | 1  | 1  | 1  | 0  | 0  | 0  | 1  | 0  | 1  | 0  | 1  | 0 |
| ENSP00000351631,ENSP00000351631,EN                                |          |     |    |    |    |    |    |    |    |    |    |    |    |    |    |    |    |    |    |    |    |    |    |    |    |    |    |    |    |    |    |    |   |

|                        |                 |                 |       |    |    |    |    |    |    |    |    |    |    |    |    |    |    |    |    |    |    |    |    |    |    |    |    |    |    |    |    |    |    |   |
|------------------------|-----------------|-----------------|-------|----|----|----|----|----|----|----|----|----|----|----|----|----|----|----|----|----|----|----|----|----|----|----|----|----|----|----|----|----|----|---|
| ENSP0000035290         | ENSP0000        | ENSG00000197056 | ZMYM1 | 22 | 1  | 2  | 0  | 0  | 1  | 0  | 0  | 0  | 0  | 1  | 0  | 0  | 2  | 1  | 2  | 2  | 2  | 1  | 0  | 2  | 0  | 0  | 0  | 0  | 1  | 1  | 0  | 3  | 0  | 0 |
| ENSP0000035298         | ENSG00000130311 | DDA1            | 24    | 0  | 1  | 0  | 0  | 2  | 0  | 1  | 1  | 0  | 0  | 1  | 2  | 0  | 0  | 1  | 1  | 1  | 1  | 0  | 2  | 2  | 0  | 1  | 1  | 0  | 2  | 1  | 0  | 0  | 2  | 1 |
| ENSP0000035299         | ENSP0000        | CNSK1E          | 28    | 1  | 1  | 1  | 1  | 1  | 2  | 1  | 1  | 0  | 1  | 0  | 2  | 1  | 0  | 1  | 1  | 1  | 1  | 1  | 1  | 1  | 1  | 0  | 1  | 0  | 1  | 2  | 1  | 1  | 1  |   |
| ENSP0000035298         | ENSP0000        | CHCND2          | 106   | 7  | 5  | 3  | 2  | 1  | 2  | 5  | 3  | 4  | 6  | 3  | 4  | 1  | 4  | 2  | 4  | 3  | 2  | 4  | 1  | 10 | 5  | 7  | 3  | 1  | 1  | 5  | 4  | 3  | 0  |   |
| ENSP00000353025        | ENSG00000196937 | FAM3C           | 133   | 7  | 5  | 1  | 3  | 6  | 3  | 6  | 3  | 3  | 7  | 3  | 2  | 3  | 4  | 2  | 8  | 11 | 9  | 4  | 7  | 4  | 6  | 6  | 3  | 2  | 2  | 2  | 4  | 5  | 2  |   |
| ENSP00000353030        | ENSP0000        | PTRPF           | 65    | 2  | 5  | 3  | 3  | 2  | 4  | 3  | 1  | 1  | 1  | 0  | 0  | 1  | 2  | 3  | 5  | 4  | 0  | 2  | 1  | 1  | 0  | 1  | 4  | 2  | 5  | 3  | 3  | 3  | 0  |   |
| ENSP00000353046        | ENSP0000        | PRPFA0A         | 185   | 7  | 6  | 1  | 4  | 5  | 2  | 6  | 8  | 3  | 7  | 5  | 9  | 8  | 6  | 9  | 9  | 4  | 6  | 10 | 5  | 9  | 9  | 8  | 5  | 6  | 3  | 9  | 6  | 5  | 0  |   |
| ENSP00000353089        | ENSP0000        | SFRS2           | 150   | 3  | 2  | 9  | 2  | 5  | 8  | 2  | 3  | 5  | 3  | 1  | 3  | 3  | 2  | 11 | 1  | 4  | 9  | 6  | 7  | 6  | 4  | 3  | 7  | 3  | 11 | 8  | 3  | 5  | 11 |   |
| ENSP00000353098        | ENSG00000197771 | C10orf119       | 89    | 6  | 3  | 4  | 3  | 1  | 1  | 2  | 0  | 3  | 5  | 1  | 4  | 4  | 5  | 3  | 5  | 9  | 4  | 6  | 3  | 2  | 2  | 2  | 0  | 2  | 0  | 1  | 3  | 2  | 5  |   |
| ENSP00000353124        | ENSP0000        | ARB1            | 48    | 5  | 3  | 5  | 1  | 0  | 3  | 2  | 2  | 1  | 1  | 0  | 0  | 2  | 0  | 2  | 1  | 2  | 1  | 0  | 0  | 1  | 2  | 0  | 1  | 5  | 3  | 2  | 1  | 0  | 2  |   |
| ENSP00000353219        | ENSG00000008441 | NFIX            | 22    | 0  | 0  | 0  | 0  | 1  | 0  | 1  | 1  | 0  | 1  | 0  | 1  | 0  | 1  | 0  | 1  | 0  | 1  | 2  | 0  | 1  | 1  | 1  | 3  | 2  | 1  | 1  | 1  | 0  | 1  |   |
| ENSP00000353224        | ENSP0000        | TFRF            | 698   | 29 | 22 | 18 | 21 | 34 | 30 | 25 | 16 | 23 | 28 | 11 | 19 | 20 | 26 | 39 | 22 | 17 | 24 | 23 | 40 | 40 | 26 | 16 | 13 | 30 | 26 | 14 | 11 | 19 | 16 |   |
| ENSP00000353224_r58176 | ENSG00000072274 | TFRF            | 692   | 31 | 26 | 20 | 21 | 34 | 30 | 24 | 16 | 23 | 33 | 15 | 21 | 17 | 20 | 37 | 22 | 15 | 24 | 21 | 35 | 37 | 25 | 16 | 13 | 30 | 25 | 14 | 12 | 19 | 16 |   |
| ENSP00000353231_r58740 | ENSG00000127603 | MACF1           | 31    | 3  | 1  | 2  | 0  | 0  | 0  | 2  | 0  | 2  | 0  | 0  | 1  | 2  | 0  | 0  | 2  | 1  | 1  | 1  | 1  | 1  | 0  | 0  | 0  | 3  | 2  | 1  | 3  | 0  | 2  |   |
| ENSP00000353243        | ENSG00000104522 | TSTA3           | 89    | 4  | 2  | 2  | 3  | 2  | 4  | 1  | 3  | 4  | 1  | 1  | 0  | 0  | 0  | 2  | 2  | 4  | 4  | 2  | 3  | 4  | 2  | 1  | 3  | 9  | 4  | 5  | 6  | 6  | 5  |   |
| ENSP00000353246        | ENSG00000198042 | MAK16           | 60    | 2  | 2  | 0  | 0  | 1  | 2  | 1  | 1  | 2  | 0  | 4  | 1  | 0  | 2  | 2  | 2  | 3  | 1  | 2  | 2  | 2  | 3  | 2  | 2  | 3  | 2  | 3  | 1  | 5  | 3  | 3 |
| ENSP00000353275        | ENSP0000        | SRGAP2P2        | 21    | 1  | 0  | 0  | 1  | 0  | 1  | 0  | 1  | 2  | 1  | 0  | 0  | 0  | 2  | 1  | 1  | 1  | 1  | 1  | 0  | 1  | 0  | 0  | 1  | 0  | 0  | 1  | 2  | 0  | 2  |   |
| ENSP00000353321        | ENSG00000197798 | FAM118B         |       |    |    |    |    |    |    |    |    |    |    |    |    |    |    |    |    |    |    |    |    |    |    |    |    |    |    |    |    |    |    |   |

|                                         |                 |          |     |    |    |    |    |    |    |    |    |    |    |   |    |    |   |    |    |    |    |    |    |    |    |   |    |    |    |    |    |    |    |   |
|-----------------------------------------|-----------------|----------|-----|----|----|----|----|----|----|----|----|----|----|---|----|----|---|----|----|----|----|----|----|----|----|---|----|----|----|----|----|----|----|---|
| ENSP00000354774,ENSP0000                | ENSG00000123178 | C13orf1  | 21  | 0  | 0  | 0  | 1  | 1  | 1  | 0  | 1  | 0  | 1  | 2 | 1  | 1  | 2 | 1  | 0  | 2  | 1  | 1  | 1  | 1  | 0  | 1 | 0  | 0  | 1  | 0  | 1  | 0  | 1  | 0 |
| ENSP00000354791,ENSP0000                | ENSG00000204843 | DCNT1    | 379 | 19 | 13 | 11 | 13 | 10 | 11 | 12 | 13 | 9  | 4  | 5 | 5  | 9  | 8 | 9  | 13 | 11 | 13 | 12 | 14 | 12 | 11 | 7 | 10 | 24 | 15 | 15 | 22 | 22 | 27 |   |
| ENSP00000354792,ENSP0000                | ENSG00000017885 | CTNNB1P1 | 32  | 0  | 0  | 0  | 0  | 5  | 3  | 2  | 0  | 0  | 0  | 2 | 0  | 1  | 0 | 3  | 0  | 1  | 1  | 3  | 2  | 2  | 0  | 0 | 0  | 2  | 1  | 2  | 1  | 0  | 0  |   |
| ENSP00000354812,ENSP0000                | ENSG00000198917 | C9orf114 | 32  | 2  | 1  | 0  | 1  | 1  | 0  | 2  | 0  | 3  | 1  | 4 | 1  | 0  | 1 | 1  | 0  | 0  | 1  | 1  | 2  | 0  | 1  | 0 | 0  | 2  | 0  | 0  | 2  | 1  | 1  |   |
| ENSP00000354812,rs22808,ENSG00000198917 |                 | C9orf114 | 25  | 1  | 1  | 0  | 1  | 0  | 1  | 0  | 2  | 0  | 2  | 4 | 0  | 0  | 2 | 1  | 0  | 0  | 1  | 0  | 1  | 0  | 1  | 0 | 0  | 2  | 0  | 0  | 1  | 2  | 2  |   |
| ENSP00000354826,ENSP0000                | ENSG00000122786 | CALD1    | 126 | 28 | 16 | 10 | 0  | 0  | 0  | 0  | 0  | 1  | 5  | 3 | 1  | 0  | 0 | 0  | 0  | 4  | 7  | 7  | 0  | 0  | 0  | 0 | 0  | 0  | 0  | 0  | 23 | 11 | 10 |   |
| ENSP00000354838,ENSP0000                | ENSG00000116001 | TIA1     | 10  | 0  | 0  | 0  | 0  | 0  | 0  | 0  | 0  | 0  | 2  | 0 | 1  | 0  | 0 | 0  | 0  | 4  | 7  | 7  | 0  | 0  | 0  | 0 | 0  | 0  | 1  | 0  | 1  | 3  | 0  | 1 |
| ENSP00000354848,ENSP0000                | ENSG00000198954 | KIAA1279 | 77  | 9  | 3  | 6  | 4  | 2  | 1  | 3  | 0  | 2  | 0  | 0 | 0  | 3  | 1 | 3  | 5  | 1  | 1  | 4  | 5  | 6  | 2  | 0 | 0  | 3  | 3  | 2  | 4  | 2  | 2  |   |
| ENSP00000354850,ENSP0000                | ENSG00000198408 | MGEA5    | 92  | 6  | 2  | 1  | 1  | 3  | 2  | 2  | 5  | 3  | 4  | 1 | 1  | 4  | 4 | 2  | 5  | 10 | 7  | 4  | 2  | 2  | 1  | 3 | 0  | 2  | 3  | 2  | 5  | 4  | 1  |   |
| ENSP00000354876,ENSP0000                | ENSG00000198712 | MT-CO2   | 304 | 13 | 3  | 9  | 8  | 9  | 10 | 4  | 4  | 7  | 17 | 2 | 11 | 4  | 4 | 10 | 10 | 12 | 12 | 7  | 9  | 8  | 24 | 8 | 13 | 18 | 19 | 11 | 21 | 6  | 11 |   |
| ENSP00000354876_G131A,ENSG00000198712   |                 | MT-CO2   | 297 | 15 | 3  | 9  | 7  | 9  | 10 | 4  | 4  | 7  | 16 | 2 | 11 | 4  | 4 | 10 | 10 | 12 | 11 | 7  | 9  | 8  | 24 | 8 | 13 | 18 | 19 | 9  | 19 | 6  | 9  |   |
| ENSP00000354880,ENSP0000                | ENSG00000133114 | KIAA1704 | 18  | 1  | 0  | 0  | 3  | 2  | 1  | 1  | 0  | 0  | 1  | 0 | 0  | 0  | 0 | 0  | 1  | 1  | 0  | 0  | 1  | 1  | 0  | 0 | 0  | 2  | 0  | 1  | 0  | 2  | 0  | 0 |
| ENSP00000354897,ENSG00000186575         |                 | NF2      | 19  | 1  | 1  | 0  | 1  | 1  | 2  | 2  | 0  | 0  | 1  | 0 | 0  | 1  | 1 | 1  | 1  | 0  | 1  | 1  | 1  | 0  | 0  | 1 | 0  | 0  | 1  | 0  | 0  | 0  | 0  | 0 |
| ENSP00000354907_1459V,ENSG00000198561   |                 | CTNND1   | 312 | 16 | 9  | 15 | 11 | 9  | 11 | 20 | 6  | 18 | 5  | 3 | 5  | 11 | 6 | 13 | 11 | 14 | 9  | 12 | 11 | 13 | 12 | 8 | 11 | 12 | 15 | 15 | 4  | 4  | 3  |   |
| ENSP00000354920,ENSP0000                | ENSG00000101065 | METTL13  | 38  | 3  | 0  | 1  | 0  | 0  | 5  | 1  | 0  | 1  | 0  | 0 | 0  | 0  | 2 | 1  | 1  | 1  | 3  | 0  | 1  | 0  | 3  | 1 | 2  | 1  | 2  | 1  | 1  | 2  | 3  | 2 |
| ENSP00000354923,ENSP0000                | ENSG00000198947 | DMD      | 12  | 5  | 2  | 0  | 0  | 0  | 0  | 0  | 0  | 0  | 0  | 0 | 0  | 0  | 2 | 0  | 0  | 0  | 0  | 0  | 0  | 0  | 0  | 0 | 0  | 0  | 0  | 0  | 0  | 0  | 0  | 1 |
| ENSP00000354947,ENSP0000                | ENSG00000198898 | CAPZ2    | 146 | 9  | 4  | 7  | 3  | 7  | 5  | 5  |    |    |    |   |    |    |   |    |    |    |    |    |    |    |    |   |    |    |    |    |    |    |    |   |

|                                         |                 |                 |      |    |    |    |    |    |    |    |    |    |    |    |    |    |    |    |    |    |    |    |    |    |    |    |    |    |    |    |    |    |   |   |
|-----------------------------------------|-----------------|-----------------|------|----|----|----|----|----|----|----|----|----|----|----|----|----|----|----|----|----|----|----|----|----|----|----|----|----|----|----|----|----|---|---|
| ENSP00000356155,ENSP0000                | ENSG00000133056 | PIK3C2B         | 12   | 0  | 0  | 2  | 0  | 0  | 1  | 0  | 0  | 0  | 1  | 0  | 0  | 0  | 0  | 0  | 0  | 1  | 0  | 1  | 1  | 0  | 0  | 0  | 0  | 2  | 2  | 1  | 0  | 0  | 0 |   |
| ENSP00000356177                         | ENSG00000182004 | CYBR11,SNRF     | 120  | 4  | 4  | 3  | 2  | 6  | 3  | 4  | 2  | 3  | 5  | 3  | 5  | 3  | 4  | 5  | 4  | 4  | 4  | 6  | 4  | 7  | 3  | 3  | 3  | 3  | 6  | 3  | 4  | 6  | 4 |   |
| ENSP00000356218                         | ENSG00000159348 | ENSP00000356243 | 67   | 3  | 3  | 1  | 3  | 4  | 3  | 2  | 3  | 3  | 4  | 0  | 2  | 1  | 1  | 2  | 2  | 1  | 1  | 3  | 1  | 3  | 2  | 1  | 5  | 2  | 1  | 4  | 2  | 3  |   |   |
| ENSP00000356243                         | ENSG00000077152 | UBE2T           | 17   | 3  | 0  | 1  | 1  | 0  | 0  | 1  | 0  | 1  | 0  | 0  | 0  | 1  | 0  | 0  | 0  | 1  | 1  | 2  | 1  | 1  | 0  | 0  | 1  | 0  | 0  | 1  | 0  | 1  |   |   |
| ENSP00000356263,ENSP0000                | ENSG00000146476 | C6orf211        | 33   | 2  | 0  | 1  | 0  | 1  | 0  | 1  | 2  | 0  | 0  | 0  | 0  | 2  | 0  | 1  | 2  | 0  | 2  | 2  | 6  | 1  | 1  | 0  | 0  | 2  | 3  | 0  | 1  | 1  |   |   |
| ENSP00000356272_rs37348,ENSP00000155906 |                 | RNMND1          | 48   | 1  | 1  | 2  | 0  | 0  | 0  | 1  | 1  | 0  | 1  | 1  | 1  | 1  | 1  | 2  | 1  | 4  | 2  | 1  | 1  | 2  | 1  | 2  | 2  | 4  | 2  | 3  | 7  | 2  |   |   |
| ENSP00000356282_rs41284,ENSP00000159166 |                 | LAD1            | 253  | 9  | 7  | 6  | 17 | 16 | 13 | 14 | 12 | 13 | 6  | 3  | 5  | 4  | 11 | 9  | 4  | 7  | 1  | 6  | 6  | 7  | 17 | 9  | 7  | 22 | 13 | 9  | 0  | 0  |   |   |
| ENSP00000356290                         | ENSG00000120254 | MTHFD1L         | 468  | 10 | 14 | 5  | 9  | 17 | 13 | 8  | 15 | 6  | 15 | 13 | 13 | 14 | 16 | 16 | 18 | 21 | 21 | 10 | 25 | 17 | 23 | 19 | 18 | 14 | 21 | 12 | 24 | 25 |   |   |
| ENSP00000356290_L5371                   | ENSG00000120254 | MTHFD1L         | 445  | 9  | 13 | 5  | 9  | 15 | 12 | 8  | 14 | 6  | 14 | 12 | 13 | 13 | 14 | 15 | 17 | 21 | 20 | 9  | 23 | 16 | 22 | 18 | 17 | 13 | 20 | 12 | 24 | 25 |   |   |
| ENSP00000356319,ENSP0000                | ENSG00000118193 | KIF14           | 21   | 4  | 0  | 0  | 1  | 0  | 0  | 2  | 0  | 0  | 1  | 0  | 2  | 0  | 1  | 1  | 0  | 0  | 0  | 0  | 2  | 0  | 1  | 0  | 2  | 2  | 0  | 1  | 0  | 1  |   |   |
| ENSP00000356320,ENSP0000                | ENSG00000203722 | RAET1G          | 16   | 0  | 1  | 0  | 1  | 0  | 0  | 0  | 0  | 0  | 0  | 1  | 0  | 0  | 0  | 1  | 1  | 1  | 0  | 0  | 1  | 3  | 2  | 2  | 0  | 0  | 0  | 1  | 1  | 0  |   |   |
| ENSP00000356348,ENSP0000                | ENSG00000120265 | PCMT1           | 140  | 7  | 8  | 3  | 2  | 3  | 2  | 4  | 3  | 3  | 3  | 1  | 4  | 4  | 4  | 3  | 5  | 8  | 4  | 5  | 8  | 4  | 4  | 4  | 4  | 7  | 6  | 3  | 10 | 8  |   |   |
| ENSP00000356348_rs4816v,ENSP00000120265 |                 | PCMT1           | 138  | 6  | 6  | 2  | 3  | 5  | 3  | 4  | 3  | 3  | 2  | 0  | 4  | 6  | 5  | 4  | 5  | 8  | 4  | 6  | 11 | 5  | 4  | 4  | 4  | 6  | 6  | 3  | 7  | 5  |   |   |
| ENSP00000356374                         | ENSG00000120253 | NUP43           | 34   | 5  | 2  | 2  | 1  | 0  | 1  | 1  | 0  | 1  | 3  | 0  | 0  | 2  | 1  | 0  | 3  | 0  | 1  | 1  | 0  | 2  | 3  | 0  | 0  | 5  | 0  | 0  | 0  | 0  |   |   |
| ENSP00000356379,ENSP0000                | ENSG00000066279 | ASPM            | 26   | 3  | 1  | 2  | 0  | 0  | 1  | 1  | 1  | 1  | 3  | 0  | 0  | 1  | 0  | 2  | 2  | 0  | 0  | 2  | 0  | 0  | 0  | 1  | 0  | 0  | 1  | 1  | 2  | 1  |   |   |
| ENSP00000356405,ENSP0000                | ENSG00000134371 | CDC73           | 137  | 9  | 6  | 5  | 3  | 5  | 3  | 7  | 4  | 3  | 4  | 3  | 6  | 1  | 2  | 0  | 5  | 7  | 3  | 6  | 6  | 2  | 7  | 4  | 4  | 5  | 5  | 3  | 4  | 7  |   |   |
| ENSP00000356411,ENSP0000                | ENSG00000116747 | UCHE2           | 188  | 5  | 1  | 4  | 6  | 6  | 4  | 3  | 4  | 5  | 3  | 0  | 2  | 7  | 2  | 6  | 13 | 13 | 9  | 5  | 5  | 8  | 11 | 1  | 5  | 12 | 12 | 7  | 9  | 9  |   |   |
| ENSP00000356418,ENSP0000                | ENSG00000116750 | TROVLS          | 188  | 7  | 3  | 5  | 7  | 5  | 6  | 7  | 4  | 8  | 2  | 2  | 4  | 4  | 5  | 5  | 10 | 11 | 9  | 11 | 6  | 6  | 1  | 3  | 6  | 11 | 5  | 9  | 9  | 9  |   |   |
| ENSP00000356436,ENSP0000                | ENSG00000116711 | PLAZ2GA4        | 17   | 0  | 0  | 0  | 0  | 0  | 0  | 5  | 1  | 2  | 0  | 0  | 0  | 0  | 0  | 0  | 0  | 0  | 0  | 0  | 0  | 0  | 0  | 1  | 0  | 3  | 4  | 0  | 0  | 1  |   |   |
| ENSP00000356437,ENSP0000                | ENSG00000111961 | SASH2           | 11   | 0  | 1  | 0  | 1  | 1  | 0  | 1  | 1  | 0  | 0  | 0  | 0  | 0  | 0  | 0  | 1  | 1  | 0  | 0  | 0  | 0  | 1  | 1  | 0  | 0  | 0  | 1  | 0  | 0  |   |   |
| ENSP00000356448,ENSP0000                | ENSG00000047410 | TPR             | 1421 | 70 | 53 | 38 | 39 | 43 | 25 | 32 | 44 | 25 | 54 | 47 | 50 | 38 | 40 | 37 | 39 | 65 | 38 | 53 | 54 | 36 | 70 | 74 | 45 | 59 | 56 | 26 | 62 | 66 |   |   |
| ENSP00000356465                         | ENSG00000118508 | RAB32           | 49   | 1  | 0  | 1  | 1  | 1  | 1  | 3  | 0  | 0  | 2  | 0  | 2  | 1  | 0  | 1  | 1  | 2  | 1  | 0  | 0  | 1  | 3  | 3  | 3  | 5  | 8  | 5  | 2  | 0  |   |   |
| ENSP00000356476,ENSP0000                | ENSG00000121486 | C1orf25         | 48   | 1  | 1  | 0  | 1  | 0  | 2  | 1  | 1  | 2  | 2  | 0  | 2  | 1  | 0  | 2  | 1  | 4  | 2  | 2  | 4  | 3  | 2  | 1  | 1  | 1  | 2  | 2  | 3  | 3  |   |   |
| ENSP00000356480,ENSP0000                | ENSG00000121481 | RNF2            | 51   | 2  | 1  | 1  | 1  | 1  | 1  | 2  | 1  | 4  | 2  | 2  | 2  | 1  | 1  | 2  | 1  | 1  | 1  | 1  | 1  | 1  | 2  | 2  | 3  | 2  | 1  | 1  | 4  | 5  |   |   |
| ENSP00000356481,ENSP0000                | ENSG00000135842 | MIAT29A         | 32   | 1  | 0  | 0  | 0  | 0  | 0  | 0  | 0  | 0  | 3  | 1  | 1  | 0  | 0  | 0  | 2  | 6  | 1  | 1  | 1  | 1  | 5  | 2  | 7  | 0  | 0  | 0  | 0  | 0  |   |   |
| ENSP00000356496,ENSP0000                | ENSG00000152818 | UTRN            | 94   | 8  | 9  | 10 | 3  | 1  | 3  | 4  | 7  | 4  | 0  | 1  | 0  | 3  | 7  | 5  | 2  | 2  | 2  | 5  | 3  | 4  | 2  | 3  | 2  | 0  | 0  | 1  | 0  | 2  | 1 |   |
| ENSP00000356515,ENSP0000                | ENSG00000152818 | UTRN            | 419  | 48 | 41 | 41 | 14 | 5  | 8  | 29 | 24 | 20 | 5  | 2  | 5  | 18 | 14 | 19 | 2  | 3  | 8  | 30 | 14 | 22 | 8  | 6  | 10 | 1  | 0  | 1  | 9  | 4  |   |   |
| ENSP00000356520,ENSP0000                | ENSG00000135829 | DHX9            | 865  | 46 | 11 | 30 | 13 | 23 | 27 | 18 | 19 | 35 | 54 | 9  | 36 | 24 | 12 | 29 | 35 | 21 | 32 | 24 | 29 | 33 | 53 | 20 | 44 | 40 | 21 | 22 | 45 | 27 |   |   |
| ENSP00000356548                         | ENSG00000135521 | LTV1            | 35   | 1  | 2  | 1  | 1  | 0  | 0  | 2  | 1  | 2  | 0  | 0  | 1  | 1  | 1  | 1  | 1  | 2  | 2  | 2  | 2  | 1  | 3  | 3  | 0  | 0  | 2  | 1  | 0  | 1  | 2 |   |
| ENSP00000356563                         | ENSG00000034693 | PEX3            | 40   | 2  | 1  | 2  | 1  | 0  | 2  | 2  | 1  | 1  | 2  | 0  | 1  | 1  | 1  | 4  | 0  | 0  | 2  | 2  | 1  | 1  | 0  | 0  | 3  | 0  | 1  | 2  | 3  | 2  | 2 |   |
| ENSP00000356567                         | ENSG00000135847 | ACB66           | 17   | 5  | 1  | 0  | 2  | 0  | 1  | 1  | 1  | 0  | 0  | 0  | 0  | 1  | 0  | 2  | 0  | 0  | 1  | 1  | 1  | 0  | 0  | 0  | 0  | 0  | 0  | 0  | 0  | 0  |   |   |
| ENSP00000356574,ENSP0000                | ENSG00000116260 | QSOX1           | 22   | 0  | 0  | 0  | 4  | 4  | 3  | 6  | 0  | 2  | 0  | 0  | 0  | 0  | 1  | 0  | 0  | 0  | 0  | 0  | 0  | 0  | 1  | 0  | 0  | 0  | 0  | 0  | 0  | 0  |   |   |
| ENSP00000356579,ENSP0000                | ENSG00000135837 | CEP350          | 46   | 2  | 1  | 1  | 2  | 3  | 2  | 1  | 0  | 2  | 2  | 1  | 1  | 2  | 3  | 1  | 1  | 1  | 1  | 3  | 3  | 2  | 1  | 1  | 1  | 1  | 0  | 1  | 4  | 2  | 0 |   |
| ENSP00000356584,ENSP0000                | ENSG00000169905 | TOR1AIP2        | 85   | 3  | 1  | 2  | 1  | 0  | 0  | 0  | 0  | 2  | 2  | 2  | 1  | 1  | 3  | 7  | 0  | 3  | 2  | 5  | 8  | 7  | 2  | 4  | 6  | 2  | 3  | 1  | 6  | 8  | 3 |   |
| ENSP00000356602                         | ENSG00000009844 | VTG1            | 82   | 5  | 1  | 4  | 3  | 1  | 4  | 2  | 0  | 1  | 2  | 1  | 0  | 4  | 0  | 2  | 5  | 3  | 6  | 2  | 2  | 3  | 4  | 0  | 1  | 6  | 5  | 3  | 6  | 2  | 4 |   |
| ENSP00000356607,ENSP0000                | ENSG00000116191 | RALGPS2         | 15   | 3  | 0  | 0  | 0  | 0  | 0  | 1  | 0  | 1  | 3  | 2  | 0  | 0  | 1  | 0  | 1  | 0  | 0  | 1  | 0  | 0  | 1  | 0  | 0  | 1  | 1  | 0  | 0  | 1  | 1 |   |
| ENSP00000356650                         | ENSG00000120333 | MRCP514         | 61   | 1  | 2  | 1  | 0  | 3  | 2  | 1  | 1  | 3  | 3  | 3  | 1  | 1  | 0  | 2  | 2  | 1  | 4  | 1  | 4  | 2  | 4  | 4  | 2  | 3  | 2  | 2  | 3  | 3  | 0 |   |
| ENSP00000356652                         | ENSG00000116161 | CACYPB          | 231  | 12 | 4  | 6  | 4  | 7  | 6  | 8  | 4  | 5  | 8  | 4  | 3  | 7  | 7  | 9  | 7  | 6  | 7  | 9  | 12 | 9  | 6  | 5  | 4  | 12 | 10 | 3  | 20 | 15 |   |   |
| ENSP00000356713                         | ENSG00000027697 | IFNGR1          | 25   | 4  | 0  | 2  | 2  | 1  | 0  | 2  | 1  | 2  | 0  | 0  | 0  | 2  | 0  | 1  | 0  | 0  | 0  | 1  | 1  | 0  | 2  | 1  | 1  | 0  | 2  | 0  | 0  | 0  | 0 |   |
| ENSP00000356737,ENSP0000                | ENSG00000120370 | GORAB           | 20   | 0  | 0  | 0  | 3  | 0  | 0  | 0  | 2  | 0  | 0  | 1  | 0  | 0  | 2  | 0  | 0  | 0  | 1  | 0  | 2  | 1  | 0  | 0  | 0  | 1  | 0  | 2  | 2  | 3  | 0 |   |
| ENSP00000356742                         | ENSG00000197442 | MAP3K5          | 17   | 0  | 0  | 0  | 0  | 2  | 4  | 0  | 2  | 0  | 0  | 0  | 0  | 0  | 0  | 1  | 0  | 2  | 1  | 0  | 0  | 0  | 2  | 2  | 0  | 0  | 1  | 0  | 0  | 0  | 0 |   |
| ENSP00000356770_rs10467,ENSP00000198734 |                 | F5              | 16   | 0  | 0  | 0  | 2  | 5  | 3  | 0  | 0  | 0  | 0  | 0  | 0  | 0  | 0  | 0  | 0  | 0  | 0  | 0  | 0  | 0  | 0  | 0  | 0  | 3  | 2  | 1  | 0  | 0  |   |   |
| ENSP00000356785,ENSP0000                | ENSG00000143156 | NME17           | 15   | 1  | 0  | 0  | 2  | 0  | 0  | 0  | 0  | 0  | 0  | 0  | 0  | 0  | 1  | 1  | 1  | 0  | 0  | 0  | 3  | 0  | 0  | 0  | 0  | 0  | 1  | 0  | 1  | 2  | 1 |   |
| ENSP00000356787,ENSP0000                | ENSG00000143153 | ATP1B1          | 66   | 3  | 4  | 3  | 1  | 3  | 6  | 5  | 1  | 3  | 2  | 0  | 0  | 1  | 0  | 2  | 0  | 1  | 1  | 2  | 2  | 3  | 3  | 1  | 2  | 6  | 6  | 4  | 1  | 0  | 0 |   |
| ENSP00000356794                         | ENSG00000112339 | HB5L1           | 35   | 2  | 1  | 0  | 2  | 2  | 2  | 0  | 1  | 0  | 1  | 0  | 1  | 1  | 1  | 2  | 1  | 1  | 0  | 1  | 2  | 2  | 1  | 0  | 1  | 1  | 2  | 0  | 3  | 3  | 2 |   |
| ENSP00000356796,ENSP0000                | ENSG00000112339 | HB5L1           | 44   | 2  | 1  | 0  | 3  | 3  | 2  | 1  | 1  | 0  | 1  | 0  | 1  | 1  | 2  | 1  | 1  | 1  | 2  | 0  | 1  | 2  | 2  | 1  | 0  | 1  | 2  | 4  | 1  | 3  | 3 |   |
| ENSP00000356807,ENSP0000                | ENSG00000143155 | TIPLR           | 42   | 2  | 0  | 2  | 4  | 3  | 3  | 1  | 1  | 1  | 0  | 0  | 1  | 0  | 0  | 2  | 1  | 3  | 2  | 3  | 3  | 1  | 1  | 0  | 1  | 1  | 1  | 1  | 1  | 1  | 2 |   |
| ENSP00000356811,ENSP0000                | ENSG00000112339 | HB5L1           | 152  | 7  | 4  | 2  | 11 | 15 | 10 | 2  | 1  | 1  | 2  | 0  | 1  | 6  | 1  | 4  | 4  | 1  | 4  | 5  | 9  | 7  | 7  | 1  | 2  | 9  | 7  | 1  | 11 | 9  | 8 |   |
| ENSP00000356827,ENSP0000                | ENSG00000197965 | MPZL1           | 11   | 2  | 0  | 1  | 1  | 0  | 1  | 1  | 0  | 0  | 0  | 0  | 0  | 0  | 0  | 0  | 1  | 0  | 1  | 1  | 0  | 0  | 0  | 0  | 0  | 0  | 0  | 0  | 0  | 1  | 1 |   |
| ENSP00000356842,ENSP0000                | ENSG00000143167 | UCK3            | 52   | 0  | 0  | 0  | 4  | 4  | 2  | 0  | 0  | 0  | 0  | 0  | 0  | 0  | 0  | 0  | 0  | 0  | 0  | 0  | 0  | 0  | 0  | 2  | 5  | 6  | 12 | 10 | 7  | 0  | 0 |   |
| ENSP00000356853                         | ENSG00000143179 | TMCO2           | 52   | 2  | 2  | 3  | 4  | 3  | 2  | 2  | 0  | 1  | 2  | 0  | 0  | 2  | 2  | 2  | 2  | 2  | 1  | 2  | 1  | 2  | 2  | 3  | 0  | 0  | 2  | 2  | 0  | 3  | 2 | 3 |
| ENSP00000356856,ENSP0000                | ENSG00000143183 | TMCO2</         |      |    |    |    |    |    |    |    |    |    |    |    |    |    |    |    |    |    |    |    |    |    |    |    |    |    |    |    |    |    |   |   |

|                          |                 |             |     |    |    |    |    |    |    |    |    |    |    |    |    |    |    |    |    |      |    |    |    |    |    |    |    |    |    |    |    |    |    |   |
|--------------------------|-----------------|-------------|-----|----|----|----|----|----|----|----|----|----|----|----|----|----|----|----|----|------|----|----|----|----|----|----|----|----|----|----|----|----|----|---|
| ENSP00000357823_rs8480:E | ENSG00000143436 | MRPL9       | 41  | 2  | 0  | 1  | 1  | 0  | 4  | 1  | 1  | 1  | 5  | 1  | 1  | 2  | 1  | 3  | 1  | 1    | 2  | 1  | 1  | 2  | 1  | 0  | 2  | 1  | 2  | 1  | 2  | 0  | 0  |   |
| ENSP00000357834,ENSP000  | ENSG00000143376 | ENX27       | 24  | 1  | 0  | 1  | 1  | 0  | 1  | 1  | 0  | 0  | 1  | 0  | 0  | 0  | 0  | 1  | 2  | 1    | 1  | 2  | 1  | 1  | 0  | 0  | 0  | 1  | 2  | 3  | 2  | 1  | 0  |   |
| ENSP00000357838,ENSP000  | ENSG00000065154 | SOAT        | 220 | 16 | 5  | 14 | 6  | 3  | 2  | 3  | 1  | 3  | 9  | 3  | 7  | 11 | 10 | 15 | 9  | 3    | 8  | 10 | 13 | 15 | 8  | 4  | 3  | 6  | 5  | 3  | 9  | 7  | 9  |   |
| ENSP00000357841,ENSP000  | ENSG00000143367 | TUFT1       | 11  | 0  | 3  | 1  | 1  | 1  | 0  | 1  | 0  | 0  | 0  | 0  | 0  | 1  | 1  | 0  | 0  | 0    | 0  | 1  | 0  | 0  | 0  | 0  | 0  | 1  | 0  | 0  | 0  | 0  | 0  |   |
| ENSP00000357851,ENSP000  | ENSG00000154473 | BUB3        | 210 | 8  | 3  | 8  | 7  | 6  | 7  | 8  | 9  | 8  | 6  | 7  | 6  | 5  | 6  | 10 | 3  | 8    | 8  | 11 | 5  | 8  | 11 | 6  | 6  | 8  | 6  | 3  | 6  | 9  | 8  |   |
| ENSP00000357857          | ENSG00000197498 | BXDC1P,BXDC | 41  | 1  | 0  | 0  | 0  | 0  | 0  | 1  | 1  | 3  | 3  | 0  | 3  | 3  | 0  | 2  | 4  | 0    | 4  | 0  | 0  | 0  | 2  | 3  | 0  | 1  | 1  | 1  | 4  | 1  | 1  | 2 |
| ENSP00000357861          | ENSG00000143416 | SELENBP1    | 145 | 2  | 5  | 3  | 10 | 16 | 11 | 3  | 4  | 3  | 1  | 1  | 0  | 6  | 6  | 2  | 0  | 0    | 0  | 5  | 7  | 6  | 0  | 1  | 1  | 22 | 22 | 8  | 0  | 0  | 0  |   |
| ENSP00000357862          | ENSG00000196177 | ACADSB      | 17  | 1  | 0  | 0  | 0  | 1  | 0  | 0  | 0  | 0  | 1  | 0  | 0  | 0  | 1  | 1  | 0  | 2    | 2  | 0  | 0  | 1  | 0  | 0  | 0  | 0  | 2  | 1  | 1  | 1  | 2  |   |
| ENSP00000357863,ENSP000  | ENSG00000155115 | GTF3C6      | 16  | 1  | 0  | 0  | 1  | 0  | 0  | 1  | 0  | 0  | 1  | 0  | 0  | 0  | 0  | 0  | 0  | 1    | 0  | 1  | 1  | 1  | 2  | 0  | 2  | 1  | 0  | 0  | 2  | 0  | 1  |   |
| ENSP00000357873,ENSP000  | ENSG00000196177 | ACADSB      | 32  | 1  | 0  | 0  | 2  | 1  | 1  | 0  | 0  | 0  | 0  | 2  | 0  | 0  | 0  | 1  | 1  | 0    | 3  | 2  | 2  | 1  | 2  | 0  | 0  | 2  | 1  | 2  | 2  | 2  | 2  |   |
| ENSP00000357876_P214H    | ENSG00000159352 | PSMD4       | 204 | 9  | 7  | 4  | 4  | 5  | 4  | 5  | 3  | 7  | 11 | 7  | 4  | 5  | 6  | 9  | 7  | 7    | 6  | 9  | 6  | 8  | 10 | 7  | 6  | 10 | 9  | 5  | 11 | 4  | 9  |   |
| ENSP00000357973          | ENSG00000135537 | LACE1       | 15  | 1  | 0  | 0  | 1  | 0  | 1  | 0  | 0  | 0  | 0  | 0  | 0  | 0  | 1  | 0  | 0  | 0    | 0  | 2  | 1  | 0  | 2  | 1  | 3  | 0  | 0  | 0  | 1  | 1  | 0  |   |
| ENSP00000357981_rs223001 | ENSG00000163131 | CTSS        | 13  | 0  | 0  | 0  | 4  | 4  | 2  | 0  | 0  | 0  | 0  | 0  | 0  | 0  | 0  | 0  | 0  | 0    | 0  | 0  | 0  | 0  | 0  | 2  | 1  | 0  | 0  | 0  | 0  | 0  | 0  |   |
| ENSP00000357984,ENSP000  | ENSG00000107679 | PLEKHA1     | 33  | 1  | 1  | 0  | 1  | 0  | 3  | 1  | 1  | 2  | 0  | 0  | 0  | 0  | 0  | 2  | 1  | 1    | 1  | 1  | 2  | 1  | 3  | 2  | 1  | 2  | 2  | 1  | 0  | 1  | 1  |   |
| ENSP00000357998,ENSP000  | ENSG00000025796 | SEC63       | 134 | 10 | 4  | 6  | 6  | 3  | 6  | 2  | 1  | 2  | 8  | 2  | 2  | 7  | 1  | 12 | 3  | 6    | 3  | 6  | 6  | 3  | 7  | 5  | 4  | 4  | 2  | 3  | 3  | 5  | 2  |   |
| ENSP00000357999          | ENSG00000143457 | GOLPH3L     | 39  | 1  | 1  | 1  | 2  | 4  | 2  | 4  | 0  | 2  | 0  | 0  | 0  | 1  | 1  | 1  | 2  | 0    | 1  | 2  | 2  | 0  | 1  | 1  | 1  | 1  | 2  | 3  | 2  | 1  | 0  |   |
| ENSP00000358038,ENSP000  | ENSG00000178409 | BEND3       | 18  | 0  | 0  | 1  | 1  | 0  | 1  | 2  | 0  | 0  | 0  | 0  | 0  | 0  | 0  | 2  | 1  | 0    | 0  | 1  | 0  | 5  | 0  | 0  | 1  | 0  | 3  | 0  | 0  | 0  | 0  |   |
| ENSP00000358039          | ENSG00000107669 | ATE1        | 69  | 8  | 3  | 2  | 2  | 2  | 3  | 0  | 0  | 0  | 0  | 0  | 0  | 0  | 2  | 0  | 1  | 3    | 5  | 4  | 3  | 2  | 3  | 2  | 1  | 0  | 5  | 4  | 4  | 7  | 1  | 2 |
| ENSP00000358039_S150R    | ENSG00000107669 | ATE1        | 67  | 7  | 3  | 2  | 2  | 2  | 3  | 0  | 0  | 0  | 0  | 0  | 0  | 0  | 2  | 0  | 1  | 3    | 4  | 4  | 3  | 3  | 3  | 2  | 1  | 0  | 5  | 3  | 4  | 7  | 1  | 2 |
| ENSP00000358042,ENSP000  | ENSG00000130348 | QRS1        | 21  | 1  | 1  | 0  | 0  | 0  | 0  | 0  | 0  | 0  | 0  | 0  | 0  | 1  | 2  | 1  | 1  | 1    | 0  | 1  | 1  | 0  | 0  | 0  | 0  | 4  | 4  | 0  | 0  | 1  | 1  |   |
| ENSP00000358043,ENSP000  | ENSG00000143369 | ECM1        | 11  | 0  | 0  | 0  | 3  | 3  | 3  | 2  | 0  | 0  | 0  | 0  | 0  | 0  | 0  | 0  | 0  | 0    | 0  | 0  | 0  | 0  | 0  | 0  | 0  | 0  | 0  | 0  | 0  | 0  | 0  |   |
| ENSP00000358050,ENSP000  | ENSG00000143374 | TAR52       | 49  | 2  | 1  | 0  | 3  | 4  | 2  | 0  | 1  | 0  | 2  | 0  | 0  | 1  | 1  | 2  | 0  | 0    | 1  | 3  | 3  | 2  | 2  | 1  | 2  | 3  | 2  | 1  | 5  | 3  | 2  |   |
| ENSP00000358059          | ENSG00000130347 | RTN4IP1     | 45  | 3  | 2  | 1  | 1  | 3  | 1  | 2  | 3  | 0  | 1  | 0  | 0  | 3  | 1  | 0  | 0  | 3    | 0  | 2  | 2  | 0  | 3  | 3  | 2  | 3  | 5  | 0  | 0  | 1  | 0  |   |
| ENSP00000358062,ENSP000  | ENSG00000112297 | AIM1        | 124 | 0  | 0  | 0  | 3  | 0  | 0  | 6  | 5  | 10 | 0  | 0  | 1  | 6  | 5  | 8  | 1  | 0    | 2  | 3  | 4  | 1  | 7  | 3  | 3  | 22 | 23 | 11 | 0  | 0  | 0  |   |
| ENSP00000358064,ENSP000  | ENSG00000163125 | RPRD2       | 112 | 4  | 1  | 2  | 7  | 4  | 3  | 4  | 4  | 2  | 4  | 1  | 3  | 4  | 3  | 6  | 3  | 4    | 4  | 6  | 6  | 7  | 3  | 1  | 3  | 1  | 2  | 3  | 6  | 5  | 7  |   |
| ENSP00000358071          | ENSG00000107651 | SEC23IP     | 232 | 9  | 10 | 10 | 8  | 9  | 4  | 7  | 5  | 6  | 1  | 1  | 2  | 10 | 6  | 7  | 10 | 13   | 12 | 13 | 11 | 5  | 13 | 5  | 9  | 12 | 11 | 6  | 4  | 6  | 7  |   |
| ENSP00000358081,ENSP000  | ENSG00000151929 | BAG3        | 72  | 2  | 3  | 3  | 1  | 1  | 2  | 2  | 1  | 1  | 1  | 0  | 0  | 4  | 3  | 4  | 5  | 4    | 3  | 2  | 3  | 4  | 1  | 3  | 0  | 3  | 4  | 2  | 4  | 3  | 3  |   |
| ENSP00000358089          | ENSG00000151923 | TIAL1       | 81  | 4  | 3  | 2  | 3  | 3  | 2  | 3  | 2  | 5  | 2  | 3  | 1  | 3  | 1  | 3  | 0  | 2    | 2  | 4  | 2  | 2  | 3  | 3  | 3  | 2  | 3  | 5  | 2  | 3  |    |   |
| ENSP00000358099          | ENSG00000148908 | RGS10       | 34  | 0  | 0  | 1  | 0  | 2  | 1  | 0  | 0  | 1  | 1  | 0  | 0  | 0  | 1  | 1  | 2  | 1    | 1  | 2  | 1  | 1  | 3  | 1  | 1  | 1  | 2  | 0  | 4  | 3  | 2  |   |
| ENSP00000358104,ENSP000  | ENSG00000198873 | GRK5        | 10  | 0  | 0  | 0  | 0  | 0  | 0  | 0  | 0  | 0  | 1  | 0  | 0  | 0  | 0  | 0  | 0  | 0    | 1  | 1  | 0  | 1  | 0  | 0  | 0  | 1  | 2  | 0  | 1  | 0  | 2  |   |
| ENSP00000358106,ENSP000  | ENSG00000008577 | PREP        | 255 | 6  | 3  | 14 | 4  | 2  | 7  | 5  | 2  | 7  | 7  | 1  | 1  | 5  | 1  | 7  | 13 | 14   | 11 | 7  | 4  | 6  | 11 | 2  | 12 | 33 | 21 | 15 | 16 | 6  | 12 |   |
| ENSP00000358126          | ENSG00000136631 | VPS4A       | 84  | 2  | 1  | 1  | 3  | 2  | 5  | 2  | 1  | 3  | 5  | 0  | 3  | 4  | 0  | 3  | 2  | 4    | 3  | 5  | 4  | 5  | 4  | 1  | 3  | 4  | 5  | 1  | 3  | 3  | 2  |   |
| ENSP00000358140_R589C    | ENSG00000107581 | EIF3A       | 860 | 37 | 28 | 19 | 28 | 30 | 24 | 26 | 17 | 19 | 19 | 20 | 17 | 17 | 41 | 33 | 25 | 35   | 41 | 34 | 39 | 34 | 25 | 27 | 13 | 38 | 35 | 26 | 39 | 43 | 31 |   |
| ENSP00000358146,ENSP000  | ENSG00000178096 | BOLA1       | 14  | 0  | 2  | 0  | 2  | 1  | 1  | 0  | 0  | 0  | 0  | 0  | 1  | 0  | 0  | 0  | 2  | 2    | 0  | 0  | 1  | 0  | 0  | 0  | 0  | 1  | 1  | 0  | 0  | 0  | 0  |   |
| ENSP00000358147          | ENSG00000151893 | C10orf46    | 10  | 0  | 0  | 1  | 0  | 0  | 0  | 1  | 0  | 0  | 0  | 0  | 0  | 0  | 1  | 0  | 2  | 0    | 1  | 1  | 1  | 0  | 0  | 0  | 0  | 1  | 0  | 1  | 0  | 0  | 0  |   |
| ENSP00000358155,ENSP000  | ENSG00000184260 | HIST2H2AC   | 518 | 10 | 9  | 21 | 3  | 11 | 22 | 6  | 15 | 15 | 68 | 17 | 9  | 10 | 11 | 16 | 9  | 8    | 11 | 3  | 21 | 21 | 24 | 22 | 18 | 24 | 17 | 14 | 49 | 17 | 17 |   |
| ENSP00000358159,ENSP000  | ENSG00000112249 | ASCC3       | 106 | 3  | 0  | 5  | 3  | 3  | 2  | 9  | 4  | 5  | 1  | 0  | 0  | 0  | 6  | 0  | 2  | 5    | 5  | 10 | 5  | 3  | 2  | 3  | 2  | 1  | 5  | 4  | 3  | 9  | 3  | 3 |
| ENSP00000358175,ENSP000  | ENSG00000203818 | HIST3HP352  | 217 | 6  | 6  | 10 | 4  | 7  | 13 | 11 | 6  | 4  | 9  | 8  | 4  | 4  | 5  | 4  | 4  | 6    | 4  | 8  | 11 | 10 | 4  | 12 | 6  | 8  | 9  | 9  | 12 | 4  | 9  |   |
| ENSP00000358211,ENSP000  | ENSG00000165868 | HSPA12A     | 62  | 3  | 1  | 2  | 14 | 11 | 10 | 0  | 0  | 0  | 5  | 0  | 3  | 1  | 0  | 0  | 5  | 4    | 2  | 0  | 0  | 1  | 0  | 0  | 0  | 0  | 0  | 0  | 0  | 0  | 0  | 0 |
| ENSP00000358241_rs65937: | ENSG00000162836 | ACPF6       | 13  | 0  | 0  | 0  | 1  | 1  | 0  | 1  | 0  | 0  | 1  | 0  | 1  | 0  | 0  | 0  | 0  | 1    | 1  | 0  | 1  | 0  | 0  | 0  | 0  | 1  | 1  | 1  | 0  | 1  | 0  | 1 |
| ENSP00000358242,ENSP000  | ENSG00000132424 | SFRS18      | 15  | 0  | 0  | 0  | 0  | 0  | 0  | 1  | 0  | 1  | 0  | 0  | 0  | 0  | 1  | 0  | 1  | 1    | 0  | 1  | 0  | 1  | 2  | 2  | 1  | 0  | 1  | 0  | 0  | 1  | 0  | 1 |
| ENSP00000358251,ENSP000  | ENSG00000151553 | FAM160B1    | 15  | 0  | 0  | 0  | 0  | 0  | 0  | 1  | 0  | 0  | 0  | 0  | 0  | 0  | 1  | 0  | 1  | 2    | 1  | 3  | 0  | 0  | 1  | 0  | 0  | 0  | 1  | 0  | 0  | 1  | 2  | 1 |
| ENSP00000358262,ENSP000  | ENSG00000131778 | CHD1L       | 63  | 2  | 2  | 2  | 2  | 2  | 0  | 1  | 3  | 3  | 0  | 0  | 0  | 0  | 1  | 0  | 1  | 1    | 4  | 2  | 1  | 6  | 1  | 4  | 0  | 1  | 5  | 2  | 3  | 4  | 5  | 5 |
| ENSP00000358272,ENSP000  | ENSG00000123545 | NUDFA4      | 42  | 0  | 3  | 0  | 0  | 1  | 1  | 0  | 2  | 0  | 3  | 2  | 1  | 1  | 1  | 1  | 1  | 2    | 1  | 1  | 2  | 1  | 1  | 3  | 1  | 4  | 4  | 3  | 0  | 2  | 2  | 2 |
| ENSP00000358283,ENSP000  | ENSG00000014123 | KIAA0776    | 198 | 5  | 2  | 3  | 6  | 4  | 6  | 6  | 6  | 3  | 9  | 1  | 3  | 10 | 3  | 8  | 6  | 8    | 8  | 4  | 10 | 11 | 6  | 9  | 13 | 10 | 8  | 7  | 6  | 9  | 1  |   |
| ENSP00000358293          | ENSG00000165813 | C10orf118   | 49  | 2  | 1  | 0  | 3  | 3  | 2  | 2  | 1  | 2  | 1  | 1  | 1  | 1  | 2  | 3  | 0  | 3    | 1  | 7  | 4  | 1  | 0  | 1  | 0  | 1  | 0  | 2  | 4  | 1  | 0  | 0 |
| ENSP00000358293_rs70957: | ENSG00000165813 | C10orf118   | 47  | 2  | 1  | 0  | 3  | 3  | 2  | 2  | 2  | 1  | 2  | 1  | 1  | 1  | 1  | 2  | 3  | 0    | 3  | 1  | 6  | 4  | 1  | 0  | 1  | 1  | 1  | 4  | 1  | 0  | 0  | 0 |
| ENSP00000358307,ENSP000  | ENSG00000196865 | NHLRC2      | 98  | 4  | 2  | 2  | 3  | 4  | 2  | 4  | 3  | 0  | 2  | 0  | 2  | 3  | 3  | 3  | 1  | 6    | 5  | 8  | 4  | 4  | 4  | 0  | 2  | 6  | 2  | 6  | 5  | 2  | 6  | 0 |
| ENSP00000358312          | ENSG00000131779 | PEX11B      | 59  | 1  | 1  | 0  | 3  | 2  | 4  | 2  | 4  | 2  | 1  | 0  | 1  | 1  | 2  | 2  | 1  | 2    | 2  | 5  | 2  | 2  | 3  | 2  | 2  | 2  | 2  | 2  | 3  | 1  | 2  |   |
| ENSP00000358398          | ENSG00000148737 | TCF7L2      | 10  | 0  | 0  | 0  | 0  | 1  | 1  | 1  | 0  | 0  | 0  | 0  | 0  | 0  | 1  | 1  | 1  | 0    | 0  | 1  | 0  | 0  | 0  | 0  | 0  | 1  | 1  | 0  | 1  | 0  | 0  | 0 |
| ENSP00000358400,ENSP000  | ENSG00000112159 | MDN1        | 273 | 30 | 15 | 12 | 6  | 2  | 2  | 12 | 4  | 2  | 8  | 1  | 9  | 8  | 6  | 2  | 9  | 11</ |    |    |    |    |    |    |    |    |    |    |    |    |    |   |

[illegible]

|                         |                 |              |     |    |   |    |    |   |    |    |   |    |    |   |   |   |   |    |   |    |    |   |   |    |    |    |    |   |    |    |    |    |   |
|-------------------------|-----------------|--------------|-----|----|---|----|----|---|----|----|---|----|----|---|---|---|---|----|---|----|----|---|---|----|----|----|----|---|----|----|----|----|---|
| ENSP00000360860         | ENSP00000360869 | IFIT5        | 25  | 0  | 0 | 1  | 0  | 0 | 2  | 2  | 1 | 0  | 0  | 0 | 0 | 0 | 1 | 0  | 0 | 0  | 1  | 1 | 1 | 2  | 3  | 1  | 1  | 3 | 2  | 0  | 2  | 0  | 1 |
| ENSP00000360869         | ENSG00000185745 | IFIT1        | 14  | 0  | 0 | 1  | 0  | 0 | 1  | 0  | 0 | 0  | 0  | 0 | 1 | 0 | 0 | 0  | 0 | 0  | 0  | 0 | 0 | 2  | 2  | 1  | 2  | 1 | 2  | 0  | 1  | 0  | 0 |
| ENSP00000360936_r575430 | ENSG00000162368 | CMPK1        | 11  | 0  | 0 | 0  | 0  | 2 | 0  | 1  | 0 | 0  | 0  | 0 | 0 | 0 | 0 | 0  | 0 | 0  | 0  | 4 | 0 | 1  | 0  | 0  | 0  | 1 | 2  | 0  | 0  | 0  |   |
| ENSP00000360939         | ENSP00000360939 | CMPK1        | 111 | 1  | 0 | 4  | 10 | 5 | 12 | 9  | 0 | 10 | 0  | 0 | 2 | 1 | 2 | 2  | 2 | 5  | 5  | 0 | 1 | 1  | 0  | 2  | 10 | 8 | 10 | 3  | 3  | 3  |   |
| ENSP00000360985         | ENSP00000360985 | ARFGF2       | 109 | 10 | 7 | 6  | 10 | 5 | 7  | 10 | 6 | 5  | 0  | 0 | 3 | 1 | 2 | 2  | 1 | 3  | 2  | 3 | 1 | 1  | 3  | 0  | 5  | 8 | 3  | 0  | 2  | 3  |   |
| ENSP00000361001         | ENSP00000361001 | KIAA0494     | 13  | 0  | 1 | 0  | 0  | 0 | 0  | 2  | 0 | 0  | 0  | 1 | 2 | 1 | 3 | 1  | 0 | 0  | 0  | 1 | 0 | 0  | 0  | 0  | 0  | 1 | 0  | 0  | 0  | 0  |   |
| ENSP00000361010         | ENSG00000148300 | REXO4        | 31  | 2  | 1 | 0  | 1  | 1 | 0  | 2  | 0 | 1  | 5  | 0 | 3 | 1 | 0 | 1  | 0 | 0  | 0  | 1 | 0 | 1  | 2  | 1  | 0  | 0 | 1  | 0  | 3  | 2  |   |
| ENSP00000361021         | ENSG00000171862 | PTENP1,PTEN  | 10  | 1  | 0 | 0  | 1  | 1 | 2  | 1  | 1 | 0  | 0  | 0 | 0 | 0 | 0 | 0  | 0 | 0  | 0  | 1 | 0 | 0  | 0  | 0  | 0  | 0 | 1  | 0  | 0  | 1  |   |
| ENSP00000361027         | ENSG00000126016 | AMOT         | 12  | 0  | 1 | 0  | 5  | 2 | 1  | 0  | 1 | 0  | 1  | 0 | 0 | 0 | 0 | 1  | 0 | 0  | 0  | 0 | 0 | 0  | 0  | 0  | 0  | 0 | 0  | 0  | 0  | 0  |   |
| ENSP00000361042         | ENSP00000361042 | SURF1        | 39  | 1  | 0 | 3  | 0  | 1 | 4  | 2  | 0 | 1  | 2  | 0 | 1 | 1 | 0 | 2  | 0 | 1  | 5  | 4 | 0 | 4  | 2  | 0  | 2  | 0 | 0  | 2  | 0  | 0  |   |
| ENSP00000361050         | ENSP00000361050 | SURF4        | 90  | 9  | 0 | 7  | 1  | 0 | 5  | 0  | 0 | 3  | 9  | 0 | 2 | 4 | 0 | 2  | 3 | 0  | 4  | 0 | 0 | 5  | 2  | 0  | 5  | 6 | 4  | 3  | 10 | 0  |   |
| ENSP00000361064         | ENSG00000107789 | MINPP1       | 31  | 1  | 0 | 1  | 0  | 0 | 0  | 2  | 0 | 0  | 0  | 0 | 0 | 1 | 0 | 2  | 2 | 3  | 2  | 1 | 4 | 4  | 3  | 0  | 1  | 1 | 0  | 0  | 1  | 1  |   |
| ENSP00000361076         | ENSG00000148303 | RPL7AP62,RPL | 299 | 13 | 8 | 12 | 5  | 7 | 6  | 9  | 7 | 5  | 11 | 4 | 0 | 4 | 7 | 10 | 7 | 15 | 11 | 9 | 8 | 14 | 12 | 12 | 9  | 8 | 13 | 17 | 9  | 21 |   |
| ENSP00000361083         | ENSG00000148671 | C10orf116    | 10  | 0  | 0 | 0  | 0  | 0 | 0  | 0  | 0 | 0  | 0  | 1 | 0 | 0 | 0 | 0  | 0 | 2  | 1  | 4 | 0 | 0  | 0  | 0  | 1  | 1 | 0  | 0  | 0  | 0  |   |
| ENSP00000361084         | ENSG00000180992 | MRPL14       | 32  | 1  | 1 | 1  | 1  | 2 | 0  | 0  | 2 | 1  | 0  | 4 | 0 | 0 | 0 | 0  | 0 | 0  | 0  | 0 | 2 | 0  | 1  | 1  | 2  | 2 | 3  | 0  | 1  | 3  |   |
| ENSP00000361092         | ENSG00000148296 | SURF6        | 73  | 3  | 1 | 0  | 1  | 3 | 2  | 0  | 2 | 2  | 2  | 6 | 3 | 1 | 1 | 2  | 0 | 3  | 2  | 3 | 6 | 1  | 2  | 8  | 3  | 1 | 2  | 1  | 3  | 5  |   |
| ENSP00000361092_r88608  | ENSG00000148296 | SURF6        | 61  | 2  | 0 | 0  | 0  | 2 | 1  | 0  | 1 | 1  | 1  | 5 | 3 | 0 | 1 | 2  | 0 | 4  | 3  | 3 | 6 | 0  | 3  | 8  | 4  | 1 | 2  | 0  | 2  | 3  |   |
| ENSP00000361162         | ENSG00000132773 | TOE1         | 29  | 0  | 0 | 0  | 0  | 0 | 0  | 1  | 1 | 1  | 0  | 0 | 0 | 1 | 1 |    |   |    |    |   |   |    |    |    |    |   |    |    |    |    |   |

|                                                         |                  |              |      |    |    |    |    |    |    |    |    |    |    |    |    |    |    |    |    |    |    |    |    |    |    |    |    |    |    |    |    |    |    |   |
|---------------------------------------------------------|------------------|--------------|------|----|----|----|----|----|----|----|----|----|----|----|----|----|----|----|----|----|----|----|----|----|----|----|----|----|----|----|----|----|----|---|
| ENSP00000362409,ENSP00000362413                         | ENSG00000102144  | FAM129B      | 297  | 10 | 5  | 6  | 12 | 17 | 12 | 13 | 9  | 17 | 6  | 5  | 7  | 5  | 11 | 10 | 6  | 13 | 12 | 11 | 11 | 12 | 11 | 6  | 7  | 13 | 11 | 8  | 7  | 14 | 10 |   |
| ENSP00000362413                                         | ENSG00000102144  | PGK1         | 1183 | 45 | 32 | 37 | 23 | 54 | 55 | 38 | 28 | 42 | 31 | 15 | 22 | 19 | 25 | 31 | 39 | 47 | 51 | 28 | 55 | 35 | 39 | 24 | 26 | 68 | 65 | 49 | 63 | 53 | 44 |   |
| ENSP00000362424,ENSP00000362455                         | ENSG00000102390  | TRAF3P1      | 10   | 0  | 0  | 0  | 0  | 0  | 1  | 0  | 1  | 0  | 0  | 0  | 0  | 2  | 0  | 1  | 0  | 0  | 1  | 1  | 1  | 0  | 0  | 0  | 1  | 0  | 0  | 0  | 0  | 0  | 1  |   |
| ENSP00000362455                                         | ENSG00000102390  | Cxorf26      | 85   | 4  | 3  | 2  | 4  | 4  | 2  | 2  | 2  | 3  | 4  | 0  | 1  | 2  | 1  | 1  | 4  | 5  | 2  | 3  | 7  | 3  | 0  | 0  | 0  | 0  | 4  | 5  | 2  | 7  | 3  | 5 |
| ENSP00000362456                                         | ENSG00000102390  | Cxorf26      | 112  | 8  | 3  | 4  | 5  | 5  | 2  | 3  | 2  | 3  | 4  | 0  | 1  | 3  | 1  | 1  | 5  | 5  | 2  | 4  | 8  | 4  | 0  | 0  | 0  | 0  | 8  | 5  | 4  | 9  | 5  | 8 |
| ENSP00000362463,rs4746:E                                | ENSG000000124767 | GLO1         | 153  | 5  | 5  | 6  | 1  | 18 | 16 | 4  | 2  | 3  | 2  | 2  | 2  | 4  | 2  | 4  | 5  | 8  | 4  | 3  | 9  | 7  | 1  | 1  | 2  | 4  | 6  | 3  | 12 | 7  | 5  |   |
| ENSP00000362493,ENSP00000362504,ENSP00000362504         | ENSG000001138485 | HUJR         | 11   | 0  | 1  | 1  | 0  | 1  | 0  | 0  | 1  | 0  | 0  | 0  | 0  | 0  | 0  | 0  | 0  | 0  | 2  | 0  | 0  | 2  | 0  | 2  | 0  | 0  | 0  | 0  | 1  | 0  | 0  |   |
| ENSP00000362504,ENSP00000362532                         | ENSG000001198937 | C6orf129     | 13   | 0  | 0  | 3  | 0  | 1  | 0  | 1  | 0  | 0  | 0  | 0  | 0  | 0  | 0  | 3  | 0  | 0  | 0  | 1  | 1  | 1  | 1  | 0  | 0  | 0  | 1  | 0  | 0  | 0  | 0  |   |
| ENSP00000362532                                         | ENSG00000101413  | RPRD18       | 181  | 10 | 9  | 8  | 4  | 7  | 6  | 3  | 4  | 5  | 12 | 7  | 5  | 2  | 3  | 5  | 2  | 9  | 5  | 3  | 3  | 4  | 14 | 10 | 8  | 4  | 5  | 3  | 8  | 8  | 5  |   |
| ENSP00000362544,ENSP00000362546,ENSP00000362546         | ENSG000001167165 | UGT1A9,UGT1  | 61   | 2  | 0  | 1  | 1  | 7  | 3  | 8  | 7  | 2  | 6  | 0  | 0  | 0  | 0  | 0  | 0  | 0  | 0  | 0  | 0  | 0  | 3  | 0  | 5  | 7  | 3  | 7  | 0  | 0  | 0  |   |
| ENSP00000362546,ENSP00000362550,ENSP00000362550         | ENSG00000101407  | KIAA0406     | 25   | 1  | 0  | 1  | 2  | 2  | 0  | 2  | 1  | 0  | 0  | 0  | 0  | 0  | 0  | 1  | 0  | 1  | 1  | 0  | 3  | 1  | 1  | 0  | 0  | 0  | 0  | 0  | 1  | 2  | 4  |   |
| ENSP00000362550,ENSP00000362575,ENSP00000362575         | ENSG000001171130 | FTSD2        | 78   | 3  | 2  | 1  | 1  | 3  | 1  | 7  | 0  | 1  | 1  | 2  | 1  | 7  | 1  | 3  | 2  | 1  | 3  | 7  | 3  | 4  | 2  | 3  | 3  | 3  | 4  | 2  | 0  | 3  | 4  |   |
| ENSP00000362575,ENSP00000362638,ENSP00000362638         | ENSG000001167165 | UGT1A9,UGT1  | 47   | 2  | 0  | 1  | 4  | 2  | 6  | 2  | 0  | 4  | 0  | 0  | 0  | 0  | 0  | 0  | 0  | 0  | 0  | 0  | 0  | 0  | 3  | 0  | 5  | 8  | 3  | 7  | 0  | 0  | 0  |   |
| ENSP00000362576,ENSP00000362581,ENSP00000362581         | ENSG00000114684  | YARS         | 635  | 19 | 10 | 7  | 16 | 31 | 29 | 20 | 11 | 10 | 22 | 6  | 8  | 21 | 21 | 25 | 25 | 29 | 26 | 29 | 25 | 21 | 21 | 15 | 17 | 33 | 26 | 13 | 51 | 21 | 27 |   |
| ENSP00000362581,ENSP00000362638,ENSP00000362638         | ENSG000001162521 | RBBP4        | 230  | 9  | 7  | 7  | 5  | 10 | 9  | 7  | 7  | 6  | 9  | 4  | 5  | 5  | 6  | 7  | 7  | 8  | 12 | 10 | 7  | 11 | 10 | 7  | 4  | 13 | 9  | 4  | 13 | 5  | 7  |   |
| ENSP00000362638,ENSP00000362649,ENSP00000362649         | ENSG000001175130 | MARCKSL1     | 174  | 8  | 4  | 7  | 5  | 8  | 5  | 5  | 6  | 11 | 5  | 2  | 1  | 1  | 4  | 5  | 0  | 6  | 4  | 2  | 4  | 2  | 9  | 5  | 8  | 18 | 10 | 9  | 7  | 7  | 6  |   |
| ENSP00000362649,ENSP00000362653,ENSP00000362653         | ENSG00000119414  | PPP6C        | 34   | 3  | 1  | 0  | 2  | 2  | 2  | 2  | 0  | 1  | 1  | 1  | 0  | 1  | 1  | 0  | 4  | 0  | 0  | 1  | 1  | 2  | 0  | 1  | 0  | 1  | 0  | 2  | 1  | 1  | 3  |   |
| ENSP00000362649,ENSP00000362655,rs58313:ENSG00000136935 | ENSG00000116478  | HDA1C        | 132  | 3  | 4  | 3  | 3  | 6  | 3  | 4  | 3  | 5  | 5  | 3  | 3  | 2  | 2  | 4  | 4  | 5  | 3  | 2  | 7  | 8  | 3  | 2  | 3  | 7  | 7  | 4  | 12 | 6  | 6  |   |
| ENSP00000362653,ENSP00000362655,rs58313:ENSG00000136935 | ENSG000000066248 | NGEF         | 14   | 0  | 0  | 0  | 2  | 0  | 0  | 3  | 0  | 2  | 0  | 0  | 0  | 0  | 0  | 0  | 0  | 0  | 0  | 2  | 0  | 0  | 0  | 1  | 0  | 1  | 0  | 1  | 0  | 1  | 1  |   |
| ENSP00000362655,rs58313:ENSG00000136935                 | ENSG00000136935  | GOLGA1       | 22   | 0  | 0  | 0  | 3  | 0  | 2  | 1  | 0  | 0  | 1  | 1  | 0  | 0  | 0  | 3  | 2  | 0  | 1  | 1  | 0  | 1  | 1  | 0  | 3  | 0  | 1  | 0  | 1  | 0  | 0  |   |
| ENSP00000362687,ENSP00000362688,ENSP00000362688         | ENSG00000107625  | DDX50        | 250  | 15 | 10 | 16 | 3  | 5  | 5  | 4  | 4  | 6  | 14 | 10 | 9  | 5  | 10 | 12 | 5  | 8  | 5  | 7  | 6  | 6  | 13 | 8  | 9  | 11 | 8  | 5  | 8  | 10 | 13 |   |
| ENSP00000362688,ENSP00000362711,ENSP00000362725         | ENSG000000084623 | E1F3I        | 235  | 10 | 5  | 8  | 7  | 10 | 8  | 8  | 5  | 5  | 7  | 3  | 3  | 6  | 7  | 10 | 5  | 8  | 11 | 13 | 9  | 10 | 9  | 3  | 8  | 13 | 10 | 10 | 5  | 8  | 11 |   |
| ENSP00000362711,ENSP00000362725,ENSP00000362728         | ENSG000000084652 | TLXNA        | 202  | 8  | 6  | 5  | 8  | 4  | 4  | 7  | 7  | 9  | 7  | 3  | 2  | 6  | 7  | 8  | 5  | 8  | 6  | 6  | 11 | 7  | 6  | 7  | 5  | 8  | 8  | 4  | 10 | 11 | 9  |   |
| ENSP00000362725,ENSP00000362728,ENSP00000362744         | ENSG00000118705  | RPN2         | 18   | 2  | 0  | 1  | 0  | 0  | 1  | 0  | 1  | 0  | 2  | 0  | 1  | 1  | 0  | 1  | 1  | 0  | 1  | 0  | 0  | 1  | 1  | 0  | 1  | 0  | 1  | 0  | 0  | 0  | 0  |   |
| ENSP00000362728,ENSP00000362744,ENSP00000362747         | ENSG00000025800  | KPNAB        | 48   | 3  | 1  | 1  | 2  | 1  | 2  | 2  | 1  | 0  | 0  | 0  | 0  | 2  | 1  | 2  | 3  | 1  | 3  | 3  | 2  | 3  | 2  | 1  | 0  | 3  | 1  | 2  | 3  | 2  | 1  |   |
| ENSP00000362744,ENSP00000362747,ENSP00000362758         | ENSG00000198034  | RPS4P13,RPS4 | 408  | 14 | 7  | 13 | 8  | 10 | 13 | 14 | 10 | 16 | 13 | 6  | 11 | 15 | 6  | 14 | 21 | 12 | 15 | 8  | 17 | 16 | 21 | 7  | 11 | 23 | 11 | 23 | 19 | 14 | 20 |   |
| ENSP00000362747,ENSP00000362758,ENSP00000362803         | ENSG0000011454   | RABGAP1      | 66   | 0  | 1  | 2  | 3  | 2  | 2  | 3  | 3  | 1  | 0  | 1  | 0  | 3  | 2  | 4  | 1  | 2  | 1  | 3  | 3  | 2  | 3  | 2  | 4  | 5  | 2  | 2  | 2  | 2  | 5  |   |
| ENSP00000362758,ENSP00000362803,ENSP00000362803         | ENSG00000117148  | ZBTB26       | 22   | 1  | 2  | 1  | 0  | 2  | 0  | 0  | 1  | 0  | 1  | 0  | 1  | 0  | 0  | 1  | 2  | 0  | 1  | 1  | 1  | 1  | 1  | 0  | 1  | 1  | 1  | 1  | 1  | 1  | 0  |   |
| ENSP00000362803,ENSP00000362805,ENSP00000362805         | ENSG00000137168  | PB11         | 242  | 10 | 8  | 7  | 9  | 10 | 4  | 7  | 3  | 8  | 7  | 7  | 6  | 9  | 5  | 7  | 11 | 6  | 12 | 9  | 8  | 10 | 7  | 7  | 8  | 10 | 6  | 13 | 12 | 7  |    |   |
| ENSP00000362805,ENSP00000362807,ENSP00000362807         | ENSG00000147162  | OGT          | 128  | 6  | 9  | 0  | 5  | 2  | 3  | 6  | 3  | 4  | 1  | 4  | 4  | 5  | 7  | 3  | 1  | 4  | 2  | 9  | 9  | 5  | 6  | 8  | 1  | 2  | 2  | 4  | 5  | 7  |    |   |
| ENSP00000362807,ENSP00000362846,ENSP00000362846         | ENSG00000162517  | PEF1         | 25   | 0  | 0  | 0  | 0  | 1  | 1  | 0  | 0  | 0  | 1  | 0  | 0  | 0  | 3  | 0  | 0  | 3  | 2  | 1  | 0  | 0  | 0  | 0  | 1  | 0  | 3  | 3  | 2  | 1  | 2  |   |
| ENSP00000362846,ENSP00000362850,ENSP00000362850         | ENSG00000134644  | PUM1         | 139  | 7  | 4  | 1  | 6  | 5  | 2  | 7  | 2  | 8  | 1  | 2  | 3  | 6  | 5  | 7  | 4  | 7  | 5  | 5  | 11 | 4  | 5  | 3  | 4  | 6  | 6  | 2  | 4  | 3  | 4  |   |
| ENSP00000362850,ENSP00000362873,ENSP00000362873         | ENSG00000149636  | DSN1         | 12   | 0  | 0  | 0  | 1  | 2  | 0  | 1  | 0  | 0  | 0  | 0  | 0  | 0  | 1  | 0  | 1  | 0  | 1  | 2  | 0  | 0  | 0  | 0  | 0  | 0  | 0  | 0  | 0  | 1  | 2  |   |
| ENSP00000362873,ENSP00000362875,ENSP00000362875         | ENSG00000119421  | NUF18        | 98   | 4  | 2  | 5  | 2  | 2  | 3  | 2  | 2  | 4  | 5  | 2  | 3  | 2  | 2  | 5  | 1  | 6  | 4  | 3  | 2  | 4  | 6  | 2  | 2  | 5  | 5  | 3  | 5  | 3  | 2  |   |
| ENSP00000362875,ENSP00000362887,ENSP00000362887         | ENSG00000156711  | MAPK13       | 34   | 1  | 0  | 2  | 1  | 0  | 1  | 3  | 1  | 1  | 1  | 0  | 1  | 1  | 1  | 1  | 1  | 0  | 1  | 2  | 2  | 2  | 1  | 0  | 2  | 2  | 2  | 3  | 1  | 0  | 1  |   |
| ENSP00000362887,ENSP00000362888,ENSP00000362888         | ENSG00000136848  | DAB2IP       | 15   | 0  | 0  | 2  | 2  | 0  | 2  | 2  | 0  | 2  | 1  | 0  | 0  | 0  | 0  | 1  | 2  | 0  | 1  | 0  | 0  | 1  | 0  | 0  | 0  | 0  | 0  | 1  | 1  | 0  | 0  |   |
| ENSP00000362888,ENSP00000362900,rs22306:ENSG00000116350 | ENSG00000181915  | ADO          | 34   | 1  | 3  | 1  | 2  | 1  | 1  | 1  | 1  | 0  | 0  | 0  | 0  | 0  | 1  | 2  | 1  | 2  | 2  | 2  | 2  | 1  | 0  | 1  | 0  | 2  | 1  | 1  | 2  | 1  | 1  |   |
| ENSP00000362900,rs22306:ENSG00000116350,ENSP00000362918 | ENSG00000116350  | SFRS4        | 301  | 15 | 9  | 7  | 11 | 10 | 7  | 11 | 10 | 6  | 11 | 7  | 12 | 8  | 8  | 6  | 10 | 11 | 12 | 14 | 12 | 14 | 12 | 10 | 9  | 9  | 10 | 10 | 9  | 12 | 9  |   |
| ENSP00000362918,ENSP00000362937,ENSP00000362937         | ENSG00000198492  | YTHDC1       | 101  | 6  | 4  | 2  | 3  | 3  | 1  | 4  | 4  | 4  | 1  | 1  | 1  | 2  | 7  | 3  | 0  | 4  | 4  | 5  | 5  | 3  | 4  | 4  | 1  | 5  | 4  | 1  | 5  | 7  | 3  |   |
| ENSP00000362937,ENSP00000362946,ENSP00000362946         | ENSG00000180198  | RCF1         | 446  | 13 | 12 | 8  | 7  | 14 | 7  | 13 | 9  | 11 | 21 | 10 | 8  | 11 | 11 | 17 | 12 | 21 | 18 | 11 | 22 | 20 | 17 | 18 | 21 | 16 | 13 | 26 | 22 | 17 | 17 |   |
| ENSP00000362946,ENSP00000362995,ENSP00000363006         | ENSG00000119396  | RAB14        | 169  | 9  | 6  | 1  | 3  | 8  | 6  | 3  | 8  | 5  | 4  | 9  | 5  | 4  | 9  | 5  | 5  | 5  | 3  | 5  | 10 | 8  | 8  | 7  | 5  | 4  | 4  | 1  | 6  | 9  | 4  |   |
| ENSP00000362995,ENSP00000363015,ENSP00000363015         | ENSG00000130768  | SMPDL3B      | 53   | 1  | 1  | 2  | 0  | 1  | 1  | 3  | 1  | 2  | 1  | 0  | 2  | 3  | 1  | 3  | 4  | 1  | 2  | 5  | 2  | 3  | 2  | 4  | 2  | 2  | 1  | 0  | 0  | 0  | 0  |   |
| ENSP00000363015,ENSP00000363023,ENSP00000363023         | ENSG00000108064  | TFAM         | 98   | 9  | 3  | 3  | 5  | 1  | 2  | 6  | 0  | 2  | 6  | 3  | 4  | 0  | 0  | 2  | 4  | 1  | 3  | 5  | 1  | 3  | 4  | 2  | 3  | 4  | 1  | 3  | 7  | 4  | 4  |   |
| ENSP00000363023,ENSP00000363041,ENSP00000363041         | ENSG00000117748  | RPA2         | 127  | 4  | 2  | 8  | 2  | 6  | 4  | 2  | 0  | 4  | 10 | 3  | 3  | 0  | 3  | 4  | 7  | 5  | 1  | 4  | 9  | 4  | 5  | 2  | 5  | 4  | 3  | 5  | 11 | 2  | 5  |   |
| ENSP00000363041,ENSP00000363052,ENSP00000363052         | ENSG00000080845  | DLGAP1       | 37   | 4  | 4  | 2  | 2  | 2  | 2  | 1  | 2  | 1  | 0  | 0  | 1  | 0  | 0  | 1  | 0  | 0  | 2  | 1  | 1  | 0  | 0  | 0  | 0  | 3  | 2  | 2  | 1  | 1  | 1  |   |
| ENSP00000363052,ENSP00000363057,rs22416:ENSG00000122952 | ENSG00000122873  | CSD1         | 82   | 6  | 6  | 4  | 1  | 2  | 1  | 5  | 0  | 1  | 2  | 1  | 2  | 1  | 0  | 1  | 5  | 7  | 4  | 3  | 2  | 2  | 2  | 5  | 4  | 2  | 3  | 3  | 4  | 2  | 1  |   |
| ENSP00000363057,rs22416:ENSG00000122952,ENSP00000363057 | ENSG00000117758  | STX12        | 63   | 1  | 4  | 2  | 1  | 1  | 1  | 2  | 2  | 2  | 2  | 1  |    |    |    |    |    |    |    |    |    |    |    |    |    |    |    |    |    |    |    |   |

|                            |                  |          |      |    |    |    |    |    |    |    |    |    |    |    |    |    |    |    |    |    |    |    |    |    |    |    |    |    |    |    |    |    |    |   |
|----------------------------|------------------|----------|------|----|----|----|----|----|----|----|----|----|----|----|----|----|----|----|----|----|----|----|----|----|----|----|----|----|----|----|----|----|----|---|
| ENSP00000364035            | ENSG00000165591  | FAAH2    | 23   | 1  | 0  | 0  | 1  | 2  | 1  | 2  | 2  | 0  | 0  | 0  | 0  | 1  | 2  | 0  | 0  | 2  | 0  | 1  | 0  | 0  | 2  | 1  | 1  | 0  | 1  | 3  | 0  | 0  | 0  |   |
| ENSP00000364037            | ENSG00000136891  | TEX10    | 109  | 4  | 1  | 4  | 2  | 2  | 6  | 3  | 1  | 3  | 8  | 0  | 6  | 3  | 0  | 4  | 3  | 3  | 2  | 3  | 6  | 8  | 6  | 0  | 6  | 1  | 3  | 1  | 10 | 5  | 5  |   |
| ENSP00000364042,ENSP0000   | ENSG00000138448  | ITGAV    | 73   | 2  | 2  | 4  | 0  | 1  | 0  | 3  | 2  | 4  | 5  | 2  | 7  | 2  | 4  | 4  | 1  | 4  | 4  | 1  | 0  | 2  | 2  | 1  | 2  | 2  | 3  | 3  | 3  | 2  | 1  |   |
| ENSP00000364069            | ENSG00000075151  | E1F4G3   | 39   | 0  | 2  | 1  | 1  | 0  | 1  | 3  | 2  | 1  | 0  | 0  | 0  | 0  | 0  | 3  | 1  | 2  | 4  | 2  | 2  | 1  | 2  | 1  | 2  | 2  | 1  | 1  | 2  | 2  | 1  |   |
| ENSP00000364119            | ENSG00000125977  | E1F2S2   | 526  | 12 | 30 | 16 | 13 | 25 | 10 | 14 | 17 | 11 | 24 | 16 | 8  | 10 | 19 | 13 | 10 | 27 | 20 | 12 | 31 | 16 | 18 | 17 | 14 | 25 | 19 | 12 | 21 | 26 | 20 |   |
| ENSP00000364139,ENSP0000   | ENSG00000127483  | HP1BP3   | 69   | 4  | 0  | 0  | 2  | 5  | 3  | 2  | 5  | 0  | 3  | 1  | 0  | 4  | 2  | 1  | 3  | 0  | 2  | 3  | 3  | 2  | 3  | 4  | 1  | 2  | 1  | 3  | 3  | 2  | 2  | 3 |
| ENSP00000364150,ENSP0000   | ENSG00000119514  | GAINT12  | 21   | 0  | 0  | 0  | 0  | 0  | 0  | 4  | 3  | 1  | 0  | 1  | 0  | 1  | 5  | 2  | 1  | 1  | 0  | 1  | 0  | 1  | 0  | 0  | 0  | 0  | 0  | 0  | 0  | 0  | 0  |   |
| ENSP00000364176,ENSP0000   | ENSG00000182534  | MLXRA7   | 12   | 3  | 1  | 1  | 0  | 0  | 0  | 0  | 0  | 0  | 1  | 1  | 0  | 0  | 0  | 0  | 1  | 0  | 0  | 0  | 0  | 0  | 1  | 0  | 0  | 0  | 0  | 2  | 0  | 0  | 0  |   |
| ENSP00000364178,rs10012:EN | ENSG00000155657  | TTN      | 22   | 0  | 0  | 1  | 0  | 0  | 0  | 0  | 0  | 1  | 0  | 0  | 0  | 1  | 0  | 0  | 0  | 0  | 0  | 0  | 0  | 3  | 0  | 0  | 0  | 2  | 1  | 0  | 6  | 4  | 3  |   |
| ENSP00000364188,ENSP0000   | ENSG00000117242  | DDOST    | 212  | 12 | 10 | 8  | 3  | 13 | 7  | 7  | 8  | 6  | 10 | 3  | 5  | 5  | 7  | 7  | 7  | 8  | 7  | 8  | 8  | 11 | 7  | 8  | 5  | 8  | 4  | 4  | 10 | 3  | 3  |   |
| ENSP00000364194,rs11538:EN | ENSG00000125970  | RALY     | 121  | 9  | 6  | 8  | 4  | 4  | 3  | 4  | 4  | 5  | 3  | 7  | 2  | 0  | 6  | 1  | 3  | 3  | 5  | 4  | 4  | 4  | 2  | 3  | 6  | 3  | 2  | 1  | 8  | 3  | 3  |   |
| ENSP00000364207,ENSP0000   | ENSG00000095383  | TBC1D2   | 33   | 0  | 1  | 0  | 1  | 1  | 0  | 1  | 0  | 0  | 1  | 0  | 0  | 4  | 2  | 2  | 0  | 0  | 0  | 2  | 2  | 3  | 0  | 0  | 0  | 4  | 4  | 2  | 1  | 0  | 2  |   |
| ENSP00000364286,ENSP0000   | ENSG00000077549  | CAPZB    | 435  | 16 | 14 | 12 | 15 | 16 | 14 | 16 | 9  | 13 | 16 | 7  | 11 | 15 | 12 | 13 | 13 | 16 | 15 | 25 | 18 | 16 | 15 | 11 | 11 | 20 | 16 | 12 | 16 | 14 | 18 |   |
| ENSP00000364289,ENSP0000   | ENSG00000136937  | NCBP1    | 230  | 11 | 5  | 10 | 8  | 8  | 11 | 11 | 4  | 7  | 8  | 5  | 5  | 6  | 3  | 9  | 7  | 5  | 7  | 10 | 9  | 9  | 13 | 4  | 8  | 8  | 4  | 4  | 14 | 6  | 11 |   |
| ENSP00000364310            | ENSG00000188486  | H2AFX    | 463  | 10 | 5  | 16 | 4  | 7  | 13 | 7  | 13 | 12 | 68 | 15 | 8  | 9  | 6  | 16 | 9  | 4  | 11 | 4  | 17 | 19 | 24 | 13 | 20 | 23 | 13 | 13 | 49 | 14 | 21 |   |
| ENSP00000364320            | ENSG00000053372  | MRT04    | 261  | 10 | 9  | 8  | 9  | 8  | 6  | 10 | 5  | 6  | 7  | 4  | 9  | 11 | 14 | 9  | 7  | 10 | 8  | 10 | 10 | 9  | 11 | 9  | 6  | 10 | 8  | 7  | 9  | 12 | 10 |   |
| ENSP00000364334            | ENSG00000108479  | GALK1    | 125  | 9  | 6  | 7  | 3  | 6  | 6  | 3  | 1  | 2  | 0  | 0  | 0  | 3  | 3  | 3  | 9  | 8  | 4  | 3  | 5  | 3  | 5  | 2  | 4  | 12 | 7  | 5  | 2  | 1  | 3  |   |
| ENSP00000364354            | ENSG00000127463  | KIAA0090 | 116  | 5  | 3  | 4  | 8  | 6  | 7  | 7  | 5  | 6  | 3  | 0  | 3  | 5  | 1  | 5  | 1  | 2  | 3  | 5  | 4  | 4  | 2  | 0  | 3  | 5  | 4  | 3  | 2  | 6  | 4  |   |
| ENSP00000364354,rs70968:EN | ENSG00000127463  | KIAA0090 | 110  | 6  | 3  | 4  | 7  | 6  | 5  | 6  | 5  | 5  | 3  | 0  | 3  | 5  | 1  | 5  | 1  | 2  | 3  | 5  | 4  | 3  | 2  | 0  | 3  | 5  | 4  | 3  | 2  | 5  | 4  |   |
| ENSP00000364361,ENSP0000   | ENSG00000091436  |          | 11   | 0  | 0  | 0  | 2  | 0  | 0  | 1  | 0  | 0  | 0  | 0  | 0  | 3  | 0  | 1  | 0  | 0  | 0  | 0  | 1  | 0  | 0  | 0  | 0  | 1  | 0  | 1  | 0  | 0  | 1  |   |
| ENSP00000364375,rs16710:EN | ENSG00000073350  | LLGL1    | 129  | 5  | 5  | 1  | 8  | 6  | 4  | 5  | 2  | 2  | 1  | 4  | 0  | 4  | 2  | 2  | 6  | 7  | 2  | 7  | 11 | 8  | 8  | 5  | 1  | 7  | 6  | 5  | 1  | 3  | 1  |   |
| ENSP00000364398            | ENSG00000130956  | HABP4    | 88   | 7  | 3  | 3  | 2  | 4  | 1  | 2  | 0  | 1  | 1  | 2  | 0  | 2  | 5  | 2  | 4  | 4  | 2  | 1  | 5  | 3  | 5  | 6  | 2  | 6  | 2  | 2  | 4  | 4  | 3  |   |
| ENSP00000364402,ENSP0000   | ENSG00000110274  | CTF164   | 13   | 2  | 0  | 1  | 0  | 1  | 0  | 1  | 0  | 1  | 1  | 1  | 1  | 0  | 0  | 1  | 0  | 1  | 0  | 1  | 0  | 0  | 0  | 0  | 0  | 0  | 0  | 0  | 1  | 1  | 0  |   |
| ENSP00000364403,rs12584:EN | ENSG00000127481  | UBR4     | 424  | 22 | 13 | 16 | 16 | 8  | 2  | 23 | 9  | 10 | 6  | 3  | 2  | 21 | 8  | 18 | 12 | 23 | 17 | 28 | 17 | 16 | 14 | 5  | 6  | 25 | 16 | 9  | 25 | 16 | 18 |   |
| ENSP00000364403,rs12584:EN | ENSG00000127481  | UBR4     | 436  | 23 | 13 | 16 | 16 | 8  | 2  | 23 | 10 | 10 | 6  | 3  | 2  | 21 | 8  | 20 | 12 | 25 | 18 | 28 | 16 | 17 | 14 | 6  | 6  | 26 | 17 | 9  | 26 | 17 | 18 |   |
| ENSP00000364475,ENSP0000   | ENSG00000165140  | FBP1     | 49   | 0  | 0  | 0  | 0  | 1  | 0  | 6  | 5  | 9  | 0  | 0  | 0  | 0  | 0  | 1  | 0  | 0  | 0  | 0  | 0  | 0  | 7  | 2  | 5  | 6  | 4  | 3  | 0  | 0  | 0  |   |
| ENSP00000364482,ENSP0000   | ENSG000000206342 |          | 10   | 0  | 0  | 0  | 0  | 1  | 1  | 1  | 1  | 0  | 0  | 0  | 0  | 0  | 0  | 1  | 1  | 1  | 0  | 0  | 0  | 0  | 1  | 0  | 0  | 0  | 0  | 0  | 0  | 1  | 0  |   |
| ENSP00000364514,ENSP0000   | ENSG00000124313  | IQSEC2   | 12   | 0  | 0  | 0  | 0  | 0  | 0  | 0  | 0  | 0  | 0  | 0  | 0  | 0  | 1  | 0  | 1  | 1  | 0  | 1  | 1  | 2  | 1  | 1  | 1  | 0  | 1  | 1  | 0  | 0  | 0  |   |
| ENSP00000364519,ENSP0000   | ENSG000000198176 | TFPI1    | 11   | 0  | 1  | 1  | 0  | 0  | 0  | 0  | 0  | 0  | 1  | 1  | 0  | 0  | 1  | 0  | 1  | 0  | 0  | 0  | 0  | 0  | 0  | 1  | 0  | 1  | 0  | 1  | 0  | 1  | 1  |   |
| ENSP00000364528,ENSP0000   | ENSG00000126012  | JARID1C  | 45   | 2  | 2  | 2  | 2  | 2  | 1  | 2  | 1  | 1  | 1  | 1  | 1  | 2  | 2  | 2  | 2  | 0  | 1  | 3  | 3  | 0  | 1  | 3  | 0  | 0  | 0  | 2  | 2  | 2  | 2  |   |
| ENSP00000364543,ENSP0000   | ENSG000000206353 | SKIVL2   | 41   | 2  | 2  | 2  | 6  | 4  | 3  | 5  | 2  | 3  | 2  | 0  | 1  | 0  | 1  | 2  | 0  | 0  | 0  | 1  | 0  | 0  | 0  | 0  | 0  | 0  | 1  | 1  | 0  | 0  | 3  |   |
| ENSP00000364578,ENSP0000   | ENSG000000206357 |          | 128  | 7  | 5  | 1  | 4  | 2  | 3  | 5  | 5  | 2  | 7  | 4  | 1  | 3  | 6  | 4  | 4  | 5  | 3  | 4  | 7  | 5  | 4  | 4  | 4  | 6  | 4  | 2  | 8  | 7  | 2  |   |
| ENSP00000364582,ENSP0000   | ENSG00000179051  | RCC2     | 89   | 3  | 2  | 2  | 1  | 5  | 6  | 3  | 3  | 5  | 9  | 1  | 1  | 2  | 2  | 1  | 3  | 5  | 4  | 2  | 4  | 4  | 3  | 3  | 3  | 3  | 2  | 1  | 3  | 2  | 1  |   |
| ENSP00000364584,ENSP0000   | ENSG00000139842  | CUL4A    | 169  | 8  | 4  | 6  | 8  | 2  | 2  | 10 | 6  | 4  | 8  | 1  | 5  | 11 | 3  | 8  | 7  | 5  | 6  | 9  | 5  | 8  | 4  | 0  | 4  | 7  | 8  | 4  | 6  | 6  | 4  |   |
| ENSP00000364591,ENSP0000   | ENSG000000184205 | TSPYL2   | 18   | 0  | 0  | 0  | 0  | 1  | 3  | 0  | 1  | 1  | 2  | 0  | 1  | 0  | 0  | 0  | 1  | 1  | 1  | 0  | 1  | 0  | 0  | 0  | 2  | 0  | 0  | 1  | 2  | 0  | 0  |   |
| ENSP00000364613            | ENSG00000165233  | C9orf89  | 19   | 1  | 0  | 0  | 1  | 1  | 0  | 2  | 1  | 0  | 0  | 0  | 2  | 0  | 0  | 0  | 1  | 0  | 1  | 0  | 0  | 0  | 4  | 2  | 2  | 1  | 0  | 0  | 0  | 0  | 0  |   |
| ENSP00000364620            | ENSG00000142623  | PADI1    | 42   | 0  | 0  | 0  | 6  | 9  | 5  | 0  | 0  | 0  | 5  | 5  | 2  | 0  | 0  | 0  | 0  | 0  | 0  | 0  | 0  | 0  | 3  | 4  | 3  | 0  | 0  | 0  | 0  | 0  | 0  |   |
| ENSP00000364649,ENSP0000   | ENSG00000117118  | SDHB     | 109  | 6  | 0  | 3  | 0  | 0  | 0  | 3  | 2  | 2  | 6  | 2  | 1  | 3  | 1  | 4  | 8  | 3  | 3  | 3  | 2  | 7  | 7  | 8  | 10 | 3  | 5  | 4  | 3  | 5  | 5  |   |
| ENSP00000364662            | ENSG00000185963  | BICD2    | 19   | 0  | 0  | 1  | 0  | 0  | 0  | 0  | 0  | 2  | 0  | 0  | 1  | 0  | 0  | 1  | 0  | 0  | 2  | 1  | 1  | 1  | 1  | 1  | 0  | 0  | 0  | 0  | 0  | 3  | 4  |   |
| ENSP00000364691            | ENSG00000058453  | CROCC    | 91   | 0  | 0  | 0  | 0  | 0  | 0  | 2  | 3  | 2  | 1  | 2  | 4  | 4  | 6  | 4  | 6  | 8  | 7  | 9  | 11 | 8  | 1  | 4  | 1  | 1  | 0  | 0  | 2  | 2  | 3  |   |
| ENSP00000364721,ENSP0000   | ENSG00000101367  | MAPRE1   | 291  | 21 | 20 | 11 | 9  | 19 | 9  | 9  | 9  | 12 | 7  | 4  | 8  | 5  | 8  | 4  | 10 | 11 | 7  | 14 | 10 | 7  | 3  | 7  | 9  | 14 | 3  | 9  | 12 | 11 | 1  |   |
| ENSP00000364740,ENSP0000   | ENSG00000050570  | C1orf144 | 20   | 2  | 1  | 1  | 1  | 2  | 1  | 2  | 0  | 0  | 0  | 0  | 0  | 0  | 0  | 2  | 0  | 0  | 1  | 2  | 0  | 0  | 0  | 0  | 1  | 0  | 1  | 0  | 1  | 0  | 2  |   |
| ENSP00000364751,ENSP0000   | ENSG00000126217  | MSF1     | 28   | 3  | 0  | 1  | 1  | 0  | 1  | 2  | 0  | 0  | 1  | 0  | 1  | 0  | 0  | 3  | 1  | 0  | 2  | 0  | 1  | 1  | 0  | 0  | 0  | 5  | 4  | 0  | 1  | 0  | 0  |   |
| ENSP00000364781,ENSP0000   | ENSG000000086650 | ATP11A   | 35   | 1  | 2  | 4  | 4  | 6  | 5  | 2  | 3  | 2  | 0  | 0  | 0  | 0  | 0  | 1  | 0  | 0  | 1  | 0  | 0  | 1  | 0  | 1  | 0  | 1  | 0  | 0  | 0  | 1  | 0  |   |
| ENSP00000364794,ENSP0000   | ENSG00000196305  | IARS     | 786  | 13 | 5  | 12 | 23 | 40 | 29 | 28 | 17 | 22 | 19 | 2  | 13 | 27 | 9  | 30 | 28 | 39 | 38 | 25 | 33 | 27 | 24 | 18 | 24 | 42 | 43 | 31 | 52 | 33 | 40 |   |
| ENSP00000364794,V440L,ET   | ENSG00000196305  | IARS     | 768  | 12 | 5  | 11 | 23 | 40 | 28 | 28 | 17 | 21 | 20 | 2  | 14 | 27 | 9  | 28 | 28 | 37 | 37 | 25 | 33 | 26 | 23 | 18 | 23 | 40 | 41 | 30 | 50 | 33 | 39 |   |
| ENSP00000364801,ENSP0000   | ENSG00000121860  | PSF1A1B  | 1458 | 50 | 37 | 35 | 51 | 54 | 33 | 75 | 58 | 42 | 40 | 18 | 22 | 46 | 53 | 32 | 64 | 73 | 47 | 55 | 74 | 43 | 50 | 46 | 37 | 61 | 43 | 38 | 76 | 52 | 53 |   |
| ENSP00000364864,ENSP0000   | ENSG00000101350  | KIF3B    | 18   | 2  | 1  | 0  | 1  | 0  | 2  | 1  | 0  | 2  | 2  | 0  | 0  | 1  | 0  | 0  | 1  | 0  | 0  | 1  | 1  | 0  | 0  | 0  | 0  | 0  | 0  | 1  | 0  | 1  | 1  |   |
| ENSP00000364883            | ENSG00000148090  | AUH      | 17   | 0  | 0  | 0  | 0  | 0  | 1  | 0  | 0  | 2  | 1  | 0  | 0  | 0  | 0  | 0  | 0  | 1  | 1  | 1  | 1  | 1  | 1  | 0  | 2  | 1  | 1  | 0  | 1  | 0  | 1  |   |
| ENSP00000364898,ENSP0000   | ENSG00000165025  | POY      | 23   | 0  | 0  | 0  | 4  | 2  | 0  | 1  | 0  | 0  | 4  | 0  | 2  | 1  | 0  | 0  | 0  | 0  | 0  | 0  | 1  | 1  | 0  | 0  | 0  | 2  | 2  | 0  | 1  | 1  | 1  |   |
| ENSP00000364902,ENSP0000   | ENSG00000101346  | POFUT1   | 96   | 6  |    |    |    |    |    |    |    |    |    |    |    |    |    |    |    |    |    |    |    |    |    |    |    |    |    |    |    |    |    |   |

[illegible]

|                          |                  |             |      |    |    |    |    |     |    |    |    |    |    |    |    |    |    |    |    |    |    |    |    |    |    |    |    |     |    |    |    |    |    |   |
|--------------------------|------------------|-------------|------|----|----|----|----|-----|----|----|----|----|----|----|----|----|----|----|----|----|----|----|----|----|----|----|----|-----|----|----|----|----|----|---|
| ENSP00000368460          | ENSG000000067992 | PODK3       | 35   | 0  | 0  | 0  | 4  | 4   | 8  | 0  | 0  | 0  | 3  | 0  | 1  | 2  | 0  | 0  | 1  | 0  | 0  | 1  | 0  | 1  | 0  | 0  | 0  | 4   | 2  | 4  | 0  | 0  | 0  |   |
| ENSP00000368464,ENSP000  | ENSG000000186638 | KIF24       | 16   | 0  | 0  | 1  | 1  | 2   | 1  | 0  | 0  | 0  | 1  | 0  | 0  | 0  | 0  | 0  | 0  | 0  | 0  | 1  | 3  | 1  | 2  | 1  | 0  | 0   | 1  | 0  | 0  | 1  | 0  |   |
| ENSP00000368468,ENSP000  | ENSG000000050393 | CCDC90A     | 15   | 1  | 0  | 3  | 1  | 0   | 0  | 0  | 0  | 1  | 0  | 0  | 0  | 0  | 0  | 0  | 0  | 2  | 2  | 1  | 0  | 1  | 1  | 0  | 0  | 1   | 0  | 0  | 0  | 1  | 0  |   |
| ENSP00000368496          | ENSG000000176022 | B3GALT6     | 10   | 0  | 0  | 0  | 1  | 1   | 1  | 0  | 2  | 0  | 0  | 0  | 0  | 0  | 0  | 0  | 1  | 0  | 0  | 1  | 2  | 0  | 0  | 0  | 0  | 0   | 0  | 0  | 0  | 0  | 0  |   |
| ENSP00000368522,ENSP000  | ENSG000000184831 | APOO        | 48   | 1  | 0  | 0  | 1  | 3   | 1  | 3  | 1  | 0  | 2  | 3  | 1  | 2  | 1  | 1  | 2  | 4  | 0  | 2  | 5  | 1  | 3  | 3  | 1  | 1   | 1  | 1  | 2  | 1  | 0  |   |
| ENSP00000368548          | ENSG000000164398 | ACSL5       | 40   | 4  | 2  | 0  | 2  | 3   | 1  | 3  | 1  | 1  | 2  | 1  | 1  | 1  | 0  | 0  | 0  | 1  | 1  | 2  | 0  | 1  | 2  | 2  | 1  | 1   | 3  | 1  | 1  | 2  | 0  |   |
| ENSP00000368564,ENSP000  | ENSG000000124523 | SIRT5       | 17   | 0  | 1  | 0  | 1  | 1   | 1  | 1  | 1  | 2  | 0  | 0  | 0  | 1  | 0  | 0  | 0  | 2  | 0  | 2  | 0  | 0  | 1  | 0  | 0  | 0   | 1  | 0  | 1  | 1  | 0  |   |
| ENSP00000368565          | ENSG000000105821 | DNAIC2      | 162  | 8  | 8  | 8  | 4  | 2   | 5  | 6  | 3  | 5  | 5  | 4  | 2  | 4  | 9  | 8  | 3  | 4  | 3  | 9  | 6  | 6  | 4  | 2  | 5  | 5   | 5  | 6  | 6  | 7  | 10 |   |
| ENSP00000368612,ENSP000  | ENSG000000102763 | KIAA0564    | 237  | 3  | 1  | 2  | 19 | 24  | 16 | 10 | 10 | 9  | 3  | 0  | 4  | 3  | 2  | 6  | 7  | 10 | 5  | 15 | 9  | 7  | 12 | 4  | 12 | 9   | 7  | 5  | 10 | 7  | 6  |   |
| ENSP00000368646          | ENSG000000123131 | PRDX4       | 524  | 20 | 14 | 17 | 17 | 21  | 18 | 21 | 15 | 13 | 18 | 4  | 8  | 11 | 14 | 17 | 14 | 17 | 22 | 32 | 27 | 18 | 16 | 14 | 15 | 16  | 19 | 15 | 27 | 24 | 20 |   |
| ENSP00000368678,ENSP000  | ENSG000000188157 | AGRN        | 107  | 9  | 9  | 6  | 2  | 0   | 1  | 22 | 18 | 18 | 1  | 0  | 0  | 2  | 2  | 0  | 4  | 0  | 0  | 0  | 1  | 1  | 1  | 0  | 0  | 0   | 4  | 2  | 3  | 1  | 0  | 0 |
| ENSP00000368686          | ENSG000000205250 | EZF4        | 10   | 0  | 1  | 0  | 0  | 0   | 0  | 0  | 0  | 0  | 0  | 0  | 0  | 0  | 2  | 0  | 0  | 1  | 1  | 1  | 1  | 0  | 0  | 0  | 0  | 0   | 1  | 0  | 0  | 0  | 1  |   |
| ENSP00000368699          | ENSG000000187608 | ISG15       | 34   | 2  | 0  | 0  | 2  | 1   | 1  | 1  | 0  | 0  | 1  | 0  | 0  | 0  | 2  | 1  | 2  | 1  | 2  | 3  | 2  | 1  | 0  | 0  | 0  | 2   | 3  | 1  | 2  | 2  | 1  |   |
| ENSP00000368699,rs1921:5 | ENSG000000187608 | ISG15       | 14   | 0  | 0  | 0  | 0  | 0   | 0  | 2  | 2  | 1  | 0  | 0  | 0  | 1  | 0  | 1  | 0  | 0  | 0  | 1  | 0  | 1  | 0  | 0  | 0  | 2   | 1  | 1  | 0  | 0  | 0  |   |
| ENSP00000368716          | ENSG000000172766 | NARG1L      | 59   | 2  | 0  | 2  | 3  | 3   | 2  | 0  | 1  | 2  | 0  | 1  | 0  | 0  | 2  | 5  | 2  | 2  | 3  | 5  | 2  | 4  | 1  | 0  | 0  | 2   | 0  | 0  | 6  | 1  | 5  |   |
| ENSP00000368753,ENSP000  | ENSG000000185728 | YTHDF3      | 118  | 6  | 5  | 3  | 4  | 4   | 2  | 4  | 5  | 4  | 3  | 1  | 1  | 3  | 7  | 4  | 0  | 5  | 4  | 3  | 7  | 4  | 5  | 4  | 3  | 5   | 6  | 2  | 3  | 8  | 3  |   |
| ENSP00000368767          | ENSG000000198363 | ASPH        | 210  | 6  | 1  | 5  | 4  | 8   | 5  | 6  | 4  | 8  | 11 | 5  | 3  | 3  | 7  | 9  | 11 | 13 | 8  | 6  | 9  | 9  | 7  | 2  | 5  | 13  | 8  | 7  | 15 | 5  | 7  |   |
| ENSP00000368831          | ENSG000000205302 | SNX2        | 239  | 19 | 10 | 8  | 8  | 9   | 9  | 5  | 7  | 3  | 5  | 4  | 4  | 4  | 7  | 8  | 8  | 9  | 10 | 9  | 10 | 7  | 10 | 5  | 3  | 12  | 10 | 6  | 11 | 10 | 9  |   |
| ENSP00000368836,ENSP000  | ENSG000000086102 | NFX1        | 13   | 0  | 0  | 0  | 0  | 0   | 2  | 3  | 0  | 0  | 0  | 0  | 0  | 0  | 0  | 1  | 0  | 0  | 1  | 0  | 1  | 1  | 0  | 3  | 0  | 1   | 0  | 0  | 0  | 0  | 0  |   |
| ENSP00000368847,ENSP000  | ENSG000000105676 | ARMRC6      | 41   | 2  | 0  | 0  | 0  | 2   | 2  | 1  | 1  | 0  | 0  | 1  | 0  | 0  | 3  | 2  | 1  | 1  | 1  | 2  | 3  | 3  | 2  | 1  | 0  | 2   | 3  | 2  | 1  | 3  | 1  |   |
| ENSP00000368850          | ENSG000000185787 | MORF4,MORF  | 72   | 6  | 3  | 3  | 2  | 1   | 1  | 3  | 1  | 6  | 3  | 2  | 1  | 1  | 2  | 2  | 3  | 3  | 3  | 2  | 3  | 5  | 3  | 2  | 2  | 2   | 2  | 0  | 1  | 3  | 1  |   |
| ENSP00000368881,ENSP000  | ENSG000000151657 | KIN         | 59   | 11 | 5  | 5  | 2  | 0   | 1  | 3  | 0  | 2  | 1  | 0  | 0  | 2  | 0  | 2  | 1  | 1  | 1  | 3  | 0  | 2  | 5  | 1  | 1  | 1   | 1  | 0  | 2  | 3  | 3  |   |
| ENSP00000368884,ENSP000  | ENSG000000177189 | RPS6KA3     | 143  | 11 | 4  | 7  | 7  | 4   | 8  | 5  | 3  | 5  | 4  | 0  | 2  | 8  | 2  | 5  | 4  | 5  | 3  | 5  | 4  | 8  | 3  | 1  | 2  | 9   | 6  | 7  | 3  | 5  | 3  |   |
| ENSP00000368887          | ENSG000000111845 | EPAK1P1     | 71   | 3  | 1  | 3  | 2  | 0   | 2  | 2  | 0  | 3  | 3  | 0  | 1  | 2  | 0  | 2  | 5  | 2  | 6  | 3  | 2  | 4  | 3  | 0  | 3  | 3   | 1  | 1  | 7  | 3  | 4  |   |
| ENSP00000368912,ENSP000  | ENSG000000173674 | EIF1AX      | 146  | 3  | 6  | 4  | 2  | 7   | 4  | 5  | 6  | 4  | 4  | 4  | 3  | 1  | 8  | 4  | 3  | 6  | 4  | 6  | 6  | 3  | 7  | 8  | 3  | 3   | 7  | 1  | 8  | 10 | 6  |   |
| ENSP00000368939,ENSP000  | ENSG000000075426 | FOSL2       | 10   | 0  | 0  | 0  | 0  | 0   | 1  | 0  | 1  | 0  | 0  | 0  | 0  | 1  | 0  | 0  | 0  | 0  | 0  | 0  | 1  | 0  | 0  | 0  | 5  | 1   | 0  | 0  | 0  | 0  | 0  |   |
| ENSP00000368964,ENSP000  | ENSG000000184368 | MADP7D2     | 12   | 4  | 2  | 2  | 0  | 0   | 0  | 0  | 0  | 0  | 2  | 2  | 0  | 0  | 0  | 0  | 0  | 0  | 0  | 0  | 0  | 0  | 0  | 0  | 0  | 0   | 0  | 0  | 0  | 0  | 0  |   |
| ENSP00000368976,ENSP000  | ENSG000000140859 | KIFC3       | 15   | 1  | 1  | 1  | 1  | 1   | 1  | 1  | 0  | 0  | 0  | 0  | 0  | 1  | 0  | 0  | 3  | 0  | 0  | 1  | 0  | 0  | 0  | 0  | 0  | 0   | 0  | 0  | 1  | 1  | 1  |   |
| ENSP00000369020,ENSP000  | ENSG000000147010 | SH3KBP1     | 95   | 2  | 2  | 1  | 3  | 1   | 4  | 6  | 7  | 6  | 6  | 1  | 3  | 3  | 0  | 2  | 9  | 11 | 10 | 4  | 0  | 1  | 3  | 2  | 1  | 0   | 3  | 2  | 1  | 0  | 1  |   |
| ENSP00000369038          | ENSG000000124802 | EEF1E1      | 98   | 5  | 2  | 3  | 3  | 4   | 3  | 4  | 4  | 3  | 4  | 0  | 1  | 5  | 1  | 3  | 4  | 3  | 5  | 3  | 3  | 3  | 6  | 1  | 2  | 6   | 3  | 2  | 4  | 4  | 4  |   |
| ENSP00000369042          | ENSG000000205339 | IPOT7       | 336  | 19 | 7  | 15 | 3  | 11  | 12 | 8  | 9  | 9  | 19 | 1  | 12 | 17 | 9  | 24 | 15 | 10 | 14 | 17 | 11 | 16 | 9  | 2  | 12 | 12  | 9  | 7  | 9  | 8  | 10 |   |
| ENSP00000369075,ENSP000  | ENSG000000125817 | CENPB       | 32   | 1  | 1  | 0  | 2  | 3   | 0  | 3  | 1  | 0  | 2  | 1  | 1  | 0  | 0  | 2  | 1  | 0  | 2  | 2  | 1  | 4  | 2  | 1  | 1  | 0   | 0  | 1  | 0  | 0  | 0  |   |
| ENSP00000369076,ENSP000  | ENSG000000122692 | SMU1        | 206  | 12 | 3  | 6  | 5  | 7   | 4  | 7  | 6  | 5  | 8  | 1  | 5  | 6  | 2  | 7  | 5  | 9  | 11 | 7  | 10 | 7  | 15 | 7  | 8  | 5   | 8  | 5  | 10 | 9  | 6  |   |
| ENSP00000369081,ENSP000  | ENSG000000188438 | TXNDC5,MUT1 | 229  | 11 | 7  | 7  | 5  | 4   | 7  | 9  | 7  | 3  | 6  | 4  | 6  | 5  | 10 | 9  | 3  | 11 | 9  | 8  | 9  | 3  | 6  | 8  | 6  | 16  | 16 | 10 | 7  | 9  | 8  |   |
| ENSP00000369126,V271A:F  | ENSG000000180138 | CSNK1A1L    | 59   | 2  | 0  | 3  | 3  | 1   | 2  | 3  | 0  | 2  | 1  | 0  | 1  | 0  | 0  | 2  | 2  | 3  | 4  | 1  | 2  | 4  | 2  | 0  | 4  | 4   | 4  | 4  | 2  | 1  | 2  |   |
| ENSP00000369127,ENSP000  | ENSG000000086061 | DNAJA1      | 147  | 7  | 5  | 7  | 6  | 4   | 2  | 6  | 5  | 5  | 4  | 1  | 4  | 4  | 5  | 2  | 6  | 5  | 5  | 5  | 2  | 3  | 5  | 4  | 4  | 5   | 7  | 4  | 4  | 9  | 8  |   |
| ENSP00000369129,ENSP000  | ENSG000000096696 | DSP         | 1291 | 83 | 52 | 75 | 41 | 29  | 24 | 25 | 16 | 12 | 33 | 27 | 31 | 34 | 30 | 60 | 31 | 35 | 38 | 43 | 50 | 59 | 91 | 59 | 62 | 104 | 79 | 66 | 0  | 2  | 0  |   |
| ENSP00000369133          | ENSG000000131828 | PDHA1       | 211  | 9  | 7  | 7  | 7  | 8   | 4  | 6  | 8  | 5  | 11 | 5  | 6  | 3  | 6  | 3  | 9  | 7  | 6  | 9  | 9  | 5  | 9  | 8  | 7  | 8   | 11 | 6  | 9  | 7  | 6  |   |
| ENSP00000369136,rs81284: | ENSG000000188039 | NWD1        | 24   | 1  | 0  | 0  | 1  | 2   | 1  | 0  | 0  | 0  | 1  | 1  | 1  | 0  | 0  | 2  | 1  | 1  | 1  | 1  | 0  | 2  | 1  | 1  | 1  | 2   | 0  | 0  | 0  | 2  | 1  |   |
| ENSP00000369176          | ENSG000000165264 | NUDF86      | 46   | 1  | 0  | 3  | 0  | 0   | 1  | 0  | 0  | 4  | 2  | 0  | 0  | 0  | 2  | 0  | 4  | 1  | 2  | 2  | 0  | 4  | 0  | 0  | 4  | 1   | 3  | 4  | 2  | 2  | 3  |   |
| ENSP00000369213,ENSP000  | ENSG000000107201 | DXS8        | 24   | 1  | 0  | 1  | 1  | 1   | 0  | 3  | 5  | 2  | 0  | 0  | 0  | 0  | 0  | 1  | 1  | 3  | 1  | 0  | 0  | 1  | 1  | 0  | 0  | 0   | 0  | 0  | 2  | 0  | 0  |   |
| ENSP00000369217          | ENSG000000166233 | ARIH1       | 51   | 2  | 1  | 2  | 2  | 3   | 3  | 1  | 1  | 0  | 0  | 0  | 0  | 2  | 1  | 1  | 2  | 3  | 3  | 2  | 3  | 2  | 3  | 2  | 1  | 1   | 1  | 1  | 4  | 2  | 2  |   |
| ENSP00000369218          | ENSG000000134453 | PHM17       | 17   | 7  | 8  | 3  | 5  | 2   | 5  | 3  | 4  | 4  | 7  | 4  | 8  | 5  | 4  | 3  | 5  | 3  | 6  | 6  | 9  | 3  | 9  | 5  | 6  | 5   | 7  | 2  | 3  | 3  | 6  |   |
| ENSP00000369274,ENSP000  | ENSG000000144446 | PKA2        | 150  | 2  | 0  | 1  | 0  | 0   | 2  | 0  | 0  | 0  | 0  | 0  | 0  | 0  | 1  | 0  | 1  | 2  | 0  | 1  | 1  | 0  | 3  | 0  | 0  | 1   | 0  | 0  | 1  | 0  | 1  |   |
| ENSP00000369278          | ENSG000000067225 | PKM2        | 1560 | 48 | 30 | 41 | 74 | 117 | 74 | 42 | 26 | 50 | 58 | 14 | 34 | 64 | 41 | 45 | 52 | 60 | 63 | 51 | 49 | 65 | 67 | 27 | 49 | 47  | 39 | 36 | 83 | 54 | 60 |   |
| ENSP00000369292,ENSP000  | ENSG000000205413 | SAMD9       | 14   | 0  | 0  | 0  | 2  | 0   | 3  | 0  | 0  | 0  | 0  | 0  | 0  | 0  | 0  | 1  | 1  | 0  | 3  | 0  | 3  | 0  | 0  | 0  | 0  | 0   | 0  | 0  | 0  | 0  | 0  |   |
| ENSP00000369317,R392T;J3 | ENSG000000205420 | KRT6A       | 100  | 0  | 0  | 0  | 8  | 7   | 5  | 4  | 1  | 2  | 23 | 18 | 13 | 1  | 0  | 0  | 2  | 1  | 3  | 0  | 1  | 1  | 4  | 0  | 1  | 2   | 2  | 1  | 0  | 0  | 0  |   |
| ENSP00000369318,ENSP000  | ENSG000000164292 | RHOBTB3     | 17   | 0  | 2  | 0  | 0  | 0   | 2  | 0  | 0  | 0  | 0  | 0  | 0  | 0  | 2  | 0  | 5  | 0  | 1  | 0  | 1  | 2  | 0  | 0  | 0  | 0   | 0  | 1  | 0  | 0  | 0  |   |
| ENSP00000369318,rs34899: | ENSG000000164292 | RHOBTB3     | 17   | 0  | 2  | 0  | 0  | 0   | 2  | 0  | 0  | 0  | 0  | 0  | 0  | 0  | 2  | 0  | 5  | 0  | 1  | 0  | 1  | 2  | 0  | 0  | 0  | 0   | 0  | 1  | 0  | 0  | 0  |   |
| ENSP00000369411,ENSP000  | ENSG000000133119 | RF3         | 35   | 1  | 0  | 0  | 2  | 1   | 0  | 1  | 1  | 2  | 1  | 0  | 1  | 0  | 1  | 2  | 1  | 2  | 1  | 2  | 1  | 2  | 1  | 0  | 2  | 1   | 0  | 2  | 2  | 1  | 3  |   |
| ENSP00000369423,ENSP000  | ENSG000000137055 | PLAA        | 145  | 3  | 2  | 1  | 5  | 5   | 5  | 6  | 9  | 5  | 5  | 2  | 1  | 5  | 6  | 2  | 4  | 4  | 1  |    |    |    |    |    |    |     |    |    |    |    |    |   |

|                        |                  |             |     |    |    |    |    |    |    |    |    |    |    |    |    |    |    |    |    |    |    |    |    |    |     |    |    |    |    |    |    |    |    |
|------------------------|------------------|-------------|-----|----|----|----|----|----|----|----|----|----|----|----|----|----|----|----|----|----|----|----|----|----|-----|----|----|----|----|----|----|----|----|
| ENSP0000070460,ENSP000 | ENSG00000153015  | SDCCAG10    | 57  | 1  | 3  | 3  | 1  | 2  | 1  | 1  | 0  | 3  | 3  | 1  | 1  | 2  | 1  | 1  | 2  | 2  | 1  | 1  | 4  | 1  | 3   | 2  | 2  | 2  | 3  | 2  | 4  | 2  | 2  |
| ENSP0000070460_r577353 | ENSG000000153015 | SDDCAG10    | 25  | 0  | 0  | 1  | 2  | 0  | 0  | 0  | 0  | 2  | 1  | 0  | 1  | 0  | 1  | 0  | 0  | 0  | 0  | 0  | 3  | 1  | 2   | 1  | 2  | 1  | 0  | 1  | 3  | 0  | 1  |
| ENSP0000070467         | ENSG000000130021 | HDDH1A      | 19  | 2  | 2  | 2  | 2  | 1  | 1  | 0  | 0  | 0  | 0  | 0  | 0  | 0  | 2  | 0  | 1  | 0  | 0  | 0  | 1  | 1  | 0   | 0  | 0  | 2  | 1  | 0  | 0  | 1  |    |
| ENSP0000070517,ENSP000 | ENSG000000607057 | PKFK        | 419 | 24 | 18 | 22 | 11 | 18 | 15 | 15 | 9  | 17 | 8  | 0  | 4  | 8  | 4  | 14 | 20 | 23 | 26 | 20 | 15 | 18 | 13  | 4  | 8  | 16 | 12 | 9  | 17 | 16 | 15 |
| ENSP0000070526         | ENSG000000157399 | ARSE1       | 11  | 0  | 2  | 0  | 0  | 0  | 2  | 1  | 1  | 0  | 0  | 0  | 0  | 0  | 0  | 0  | 0  | 0  | 0  | 1  | 1  | 0  | 1   | 0  | 0  | 0  | 0  | 0  | 0  | 0  |    |
| ENSP0000070526_r35143H | ENSG000000157399 | ARSE1       | 12  | 2  | 1  | 3  | 1  | 1  | 3  | 1  | 0  | 0  | 0  | 0  | 0  | 0  | 0  | 0  | 0  | 0  | 0  | 0  | 0  | 0  | 0   | 0  | 0  | 0  | 0  | 0  | 0  | 0  |    |
| ENSP0000070543,ENSP000 | ENSG000000198743 | SLCSA3      | 14  | 1  | 0  | 0  | 0  | 0  | 0  | 0  | 0  | 0  | 1  | 3  | 0  | 0  | 2  | 0  | 0  | 0  | 1  | 0  | 1  | 0  | 2   | 2  | 0  | 0  | 0  | 1  | 0  | 0  |    |
| ENSP0000070557,ENSP000 | ENSG000000167842 | MIS12       | 19  | 0  | 0  | 0  | 3  | 2  | 1  | 0  | 0  | 0  | 2  | 0  | 0  | 2  | 0  | 1  | 1  | 0  | 0  | 1  | 2  | 1  | 0   | 2  | 0  | 0  | 0  | 0  | 1  | 0  |    |
| ENSP0000070582,ENSP000 | ENSG000000002586 | CD99        | 22  | 7  | 1  | 4  | 0  | 0  | 1  | 0  | 0  | 0  | 1  | 0  | 0  | 1  | 0  | 2  | 0  | 0  | 0  | 1  | 0  | 1  | 0   | 0  | 0  | 0  | 0  | 0  | 2  | 0  |    |
| ENSP0000070589         | ENSG000000101361 | NOP56       | 578 | 19 | 14 | 9  | 11 | 13 | 10 | 10 | 10 | 17 | 37 | 24 | 22 | 17 | 15 | 23 | 16 | 22 | 18 | 15 | 20 | 16 | 35  | 25 | 22 | 23 | 18 | 15 | 36 | 16 | 21 |
| ENSP0000070589_r522731 | ENSG000000101361 | NOP56       | 533 | 15 | 12 | 7  | 9  | 14 | 9  | 18 | 8  | 16 | 29 | 18 | 18 | 17 | 14 | 20 | 17 | 22 | 18 | 15 | 20 | 16 | 30  | 23 | 21 | 20 | 17 | 15 | 35 | 17 | 23 |
| ENSP0000070589_r58556K | ENSG000000101361 | NOP56       | 511 | 15 | 12 | 7  | 9  | 13 | 8  | 17 | 8  | 15 | 29 | 18 | 18 | 16 | 12 | 19 | 16 | 20 | 17 | 14 | 18 | 15 | 28  | 21 | 20 | 18 | 16 | 14 | 37 | 18 | 23 |
| ENSP0000070648         | ENSG000000185013 | NTSC1B,RDH1 | 46  | 0  | 1  | 1  | 0  | 0  | 0  | 0  | 1  | 1  | 3  | 3  | 0  | 2  | 2  | 2  | 0  | 3  | 1  | 2  | 1  | 2  | 5   | 4  | 1  | 0  | 4  | 0  | 1  | 4  | 2  |
| ENSP0000070684,ENSP000 | ENSG000000205726 | ITSN1       | 22  | 0  | 1  | 1  | 0  | 1  | 3  | 0  | 0  | 1  | 0  | 0  | 0  | 0  | 0  | 0  | 1  | 1  | 1  | 1  | 1  | 0  | 0   | 1  | 0  | 0  | 0  | 2  | 1  | 2  | 1  |
| ENSP0000070718_S540N,r | ENSG000000169093 | ASMTL1      | 48  | 1  | 0  | 1  | 2  | 0  | 0  | 1  | 1  | 0  | 0  | 0  | 0  | 0  | 2  | 5  | 4  | 5  | 2  | 4  | 6  | 0  | 0   | 0  | 1  | 4  | 0  | 3  | 3  | 3  |    |
| ENSP0000070734,ENSP000 | ENSG000000169093 | ASMTL1      | 46  | 1  | 0  | 1  | 2  | 0  | 0  | 1  | 1  | 0  | 0  | 0  | 0  | 0  | 2  | 4  | 4  | 5  | 2  | 4  | 5  | 0  | 0   | 0  | 1  | 4  | 0  | 3  | 3  | 3  |    |
| ENSP0000070736_R42L,P6 | ENSG000000134851 | TMEM165     | 59  | 2  | 0  | 3  | 2  | 1  | 4  | 3  | 0  | 4  | 2  | 0  | 0  | 1  | 1  | 3  | 1  | 0  | 0  | 2  | 3  | 0  | 3</ |    |    |    |    |    |    |    |    |

|                          |                  |              |     |    |    |    |    |    |    |    |    |    |    |    |    |    |    |    |    |    |    |    |    |    |    |    |    |    |    |    |    |    |    |   |
|--------------------------|------------------|--------------|-----|----|----|----|----|----|----|----|----|----|----|----|----|----|----|----|----|----|----|----|----|----|----|----|----|----|----|----|----|----|----|---|
| ENSP00000374020          | ENSG00000136279  | DBNL         | 160 | 7  | 9  | 6  | 4  | 7  | 6  | 5  | 4  | 6  | 4  | 4  | 3  | 2  | 5  | 7  | 3  | 1  | 3  | 4  | 11 | 4  | 10 | 7  | 3  | 5  | 7  | 4  | 7  | 4  | 8  |   |
| ENSP00000374118,ENSP000  | ENSG00000157106  | SMG1         | 18  | 0  | 1  | 1  | 1  | 0  | 0  | 1  | 0  | 0  | 1  | 0  | 0  | 0  | 1  | 0  | 0  | 1  | 0  | 4  | 2  | 1  | 0  | 0  | 0  | 0  | 1  | 0  | 2  | 1  | 0  | 0 |
| ENSP00000374121,ENSP000  | ENSG00000164880  | INTS1        | 51  | 0  | 0  | 1  | 4  | 2  | 0  | 2  | 0  | 0  | 2  | 1  | 0  | 4  | 1  | 1  | 2  | 4  | 4  | 3  | 2  | 1  | 3  | 1  | 0  | 1  | 1  | 5  | 4  | 1  |    |   |
| ENSP00000374139,ENSP000  | ENSG00000146143  | PRIM2        | 92  | 3  | 2  | 2  | 4  | 4  | 3  | 0  | 1  | 3  | 3  | 4  | 4  | 3  | 2  | 5  | 4  | 1  | 4  | 4  | 5  | 1  | 1  | 4  | 1  | 6  | 3  | 3  | 3  | 6  |    |   |
| ENSP00000374159          | ENSG00000135631  | RAB11FIP5    | 16  | 0  | 1  | 0  | 0  | 0  | 0  | 0  | 0  | 1  | 1  | 0  | 0  | 0  | 0  | 0  | 0  | 0  | 2  | 1  | 1  | 0  | 0  | 0  | 2  | 2  | 1  | 0  | 2  | 1  | 1  |   |
| ENSP00000374184,ENSP000  | ENSG00000130559  | CAMSAP1      | 18  | 0  | 2  | 2  | 0  | 0  | 0  | 0  | 0  | 0  | 0  | 0  | 0  | 0  | 1  | 1  | 2  | 1  | 0  | 3  | 4  | 1  | 0  | 0  | 0  | 0  | 0  | 0  | 0  | 0  | 0  |   |
| ENSP00000374265          | ENSG00000176153  | CPX2         | 101 | 2  | 3  | 1  | 9  | 13 | 9  | 8  | 6  | 8  | 1  | 1  | 3  | 1  | 1  | 1  | 1  | 2  | 1  | 2  | 1  | 2  | 1  | 1  | 1  | 1  | 7  | 9  | 2  | 1  | 2  | 2 |
| ENSP00000374292,rs13949  | ENSG00000176155  | CCDC57       | 13  | 1  | 0  | 1  | 0  | 0  | 2  | 2  | 0  | 2  | 0  | 0  | 1  | 0  | 0  | 0  | 1  | 1  | 0  | 1  | 0  | 1  | 0  | 0  | 0  | 0  | 0  | 1  | 0  | 0  | 0  |   |
| ENSP00000374332,ENSP000  | ENSG000001211460 | TSN          | 120 | 6  | 3  | 5  | 2  | 6  | 4  | 5  | 2  | 2  | 0  | 0  | 1  | 4  | 1  | 5  | 4  | 6  | 4  | 5  | 6  | 6  | 3  | 1  | 2  | 7  | 6  | 7  | 7  | 4  | 6  |   |
| ENSP00000374370,rs17180  | ENSG00000070182  | SPTB         | 54  | 2  | 3  | 1  | 1  | 1  | 0  | 1  | 0  | 0  | 5  | 2  | 2  | 0  | 3  | 1  | 0  | 2  | 0  | 5  | 4  | 2  | 2  | 2  | 1  | 5  | 1  | 4  | 0  | 3  | 1  |   |
| ENSP00000374407,ENSP000  | ENSG00000144283  | PKP4         | 22  | 4  | 2  | 0  | 0  | 0  | 0  | 2  | 0  | 1  | 1  | 0  | 1  | 0  | 0  | 0  | 0  | 0  | 1  | 2  | 1  | 1  | 1  | 0  | 1  | 1  | 0  | 3  | 0  | 0  | 0  |   |
| ENSP00000374455,ENSP000  | ENSG00000161011  | SQSTM1       | 117 | 3  | 3  | 5  | 2  | 9  | 8  | 3  | 6  | 3  | 7  | 3  | 1  | 3  | 3  | 4  | 3  | 3  | 1  | 2  | 4  | 3  | 3  | 4  | 6  | 7  | 7  | 4  | 2  | 4  | 1  |   |
| ENSP00000374484,ENSP000  | ENSG00000103978  | TMEM87A      | 19  | 1  | 1  | 0  | 0  | 0  | 0  | 2  | 2  | 4  | 0  | 0  | 0  | 1  | 0  | 0  | 2  | 1  | 0  | 0  | 2  | 0  | 1  | 0  | 1  | 0  | 0  | 0  | 0  | 0  | 1  |   |
| ENSP00000374507,ENSP000  | ENSG000001015133 | CCDC88C      | 16  | 1  | 0  | 0  | 1  | 0  | 0  | 1  | 1  | 0  | 0  | 0  | 0  | 1  | 1  | 0  | 0  | 1  | 1  | 1  | 1  | 0  | 1  | 1  | 1  | 1  | 0  | 1  | 0  | 0  | 0  |   |
| ENSP00000374529,ENSP000  | ENSG000000909061 | CNKN         | 35  | 1  | 1  | 2  | 0  | 2  | 1  | 1  | 1  | 1  | 2  | 1  | 3  | 1  | 0  | 0  | 1  | 1  | 0  | 1  | 1  | 1  | 1  | 1  | 2  | 3  | 1  | 3  | 0  | 1  | 1  |   |
| ENSP00000374586,ENSP000  | ENSG00000174197  | MGA          | 26  | 0  | 1  | 1  | 3  | 0  | 2  | 1  | 1  | 1  | 1  | 0  | 1  | 0  | 0  | 2  | 0  | 0  | 1  | 1  | 0  | 2  | 1  | 1  | 1  | 0  | 1  | 0  | 1  | 1  | 2  |   |
| ENSP00000374611,rs37369  | ENSG00000129493  | HEATR5A      | 11  | 0  | 2  | 1  | 0  | 0  | 0  | 1  | 0  | 0  | 1  | 0  | 0  | 1  | 0  | 0  | 0  | 0  | 0  | 1  | 0  | 0  | 1  | 0  | 0  | 2  | 0  | 1  | 0  | 0  | 0  |   |
| ENSP00000375067,ENSP000  | ENSG00000141376  | BCAS3        | 11  | 0  | 0  | 0  | 2  | 0  | 1  | 0  | 0  | 0  | 0  | 0  | 0  | 0  | 0  | 0  | 2  | 3  | 0  | 0  | 0  | 1  | 0  | 0  | 2  | 0  | 0  | 0  | 0  | 0  | 0  |   |
| ENSP00000375072,ENSP000  | ENSG00000115977  | AAK1         | 29  | 3  | 2  | 1  | 2  | 1  | 1  | 0  | 0  | 1  | 0  | 0  | 0  | 3  | 1  | 1  | 2  | 0  | 1  | 2  | 0  | 0  | 2  | 0  | 0  | 2  | 0  | 0  | 3  | 0  | 1  |   |
| ENSP00000375160          | ENSG00000126664  | RPL17P34,RPL | 140 | 4  | 2  | 4  | 3  | 4  | 7  | 4  | 1  | 6  | 7  | 1  | 4  | 5  | 2  | 7  | 5  | 4  | 6  | 3  | 7  | 4  | 4  | 4  | 4  | 5  | 9  | 4  | 9  | 5  | 5  |   |
| ENSP00000375309          | ENSG00000121789  | FAM10A5,FAM  | 456 | 19 | 17 | 13 | 12 | 21 | 11 | 15 | 8  | 10 | 23 | 9  | 9  | 15 | 19 | 12 | 11 | 19 | 14 | 14 | 24 | 14 | 19 | 9  | 12 | 21 | 20 | 10 | 22 | 21 | 13 |   |
| ENSP00000375309,rs39933  | ENSG00000121789  | FAM10A5,FAM  | 600 | 25 | 25 | 15 | 17 | 27 | 16 | 17 | 13 | 13 | 26 | 12 | 12 | 17 | 26 | 15 | 15 | 24 | 18 | 21 | 31 | 17 | 23 | 14 | 16 | 26 | 27 | 16 | 29 | 29 | 18 |   |
| ENSP00000375357          | ENSG00000121829  | RPS26P3      | 90  | 5  | 2  | 3  | 0  | 1  | 4  | 2  | 2  | 4  | 4  | 2  | 2  | 4  | 3  | 3  | 3  | 4  | 5  | 2  | 5  | 3  | 4  | 1  | 2  | 3  | 2  | 3  | 5  | 3  | 4  |   |
| ENSP00000375503          | ENSG00000180764  | PIPSL        | 119 | 4  | 3  | 3  | 0  | 0  | 4  | 1  | 2  | 4  | 12 | 3  | 1  | 3  | 0  | 6  | 4  | 5  | 4  | 2  | 3  | 5  | 7  | 2  | 3  | 9  | 7  | 2  | 10 | 4  | 6  |   |
| ENSP00000375503,rs11815  | ENSG00000180764  | PIPSL        | 235 | 10 | 9  | 5  | 3  | 5  | 6  | 4  | 5  | 5  | 16 | 10 | 4  | 4  | 5  | 9  | 8  | 11 | 8  | 7  | 6  | 7  | 10 | 9  | 7  | 14 | 13 | 4  | 14 | 7  | 10 |   |
| ENSP00000375804          | ENSG00000104884  | ERC2C        | 10  | 1  | 0  | 0  | 0  | 0  | 0  | 0  | 0  | 1  | 2  | 0  | 0  | 0  | 0  | 0  | 0  | 0  | 1  | 0  | 1  | 0  | 0  | 0  | 0  | 0  | 2  | 1  | 0  | 1  | 0  |   |
| ENSP00000375841,ENSP000  | ENSG00000076928  | ARRGEF1      | 57  | 1  | 1  | 0  | 3  | 0  | 2  | 2  | 3  | 5  | 0  | 0  | 1  | 3  | 1  | 0  | 4  | 2  | 3  | 2  | 1  | 1  | 1  | 1  | 1  | 4  | 2  | 5  | 4  | 3  | 1  |   |
| ENSP00000375881          | ENSG00000163283  | ALPP         | 106 | 0  | 0  | 0  | 0  | 0  | 0  | 0  | 0  | 0  | 1  | 0  | 0  | 0  | 2  | 0  | 0  | 0  | 0  | 0  | 0  | 0  | 0  | 39 | 27 | 37 | 0  | 0  | 0  | 0  | 0  |   |
| ENSP00000375881,rs13026f | ENSG00000163283  | ALPP         | 106 | 0  | 0  | 0  | 0  | 0  | 0  | 0  | 0  | 0  | 1  | 0  | 0  | 0  | 2  | 0  | 0  | 0  | 0  | 0  | 0  | 0  | 0  | 39 | 27 | 37 | 0  | 0  | 0  | 0  | 0  |   |
| ENSP00000375916          | ENSG00000152061  | RABGAP1L     | 31  | 0  | 1  | 1  | 1  | 3  | 1  | 1  | 1  | 1  | 1  | 1  | 0  | 1  | 1  | 1  | 0  | 2  | 1  | 1  | 1  | 1  | 1  | 1  | 2  | 1  | 1  | 1  | 1  | 1  | 1  |   |
| ENSP00000376008,R235CA   | ENSG00000120438  | TCGP1        | 476 | 22 | 6  | 19 | 11 | 13 | 13 | 13 | 6  | 12 | 22 | 5  | 7  | 19 | 8  | 18 | 19 | 16 | 24 | 22 | 16 | 25 | 12 | 6  | 13 | 19 | 17 | 21 | 31 | 19 | 22 |   |
| ENSP00000376054          | ENSG00000162735  | PEX1N        | 64  | 2  | 5  | 3  | 4  | 2  | 1  | 2  | 0  | 1  | 0  | 1  | 0  | 0  | 2  | 1  | 5  | 1  | 0  | 5  | 3  | 2  | 0  | 0  | 0  | 1  | 1  | 0  | 6  | 12 | 4  |   |
| ENSP00000376067,ENSP000  | ENSG00000105220  | GPI          | 133 | 6  | 4  | 3  | 2  | 7  | 4  | 5  | 0  | 4  | 5  | 2  | 3  | 8  | 5  | 4  | 2  | 3  | 2  | 6  | 6  | 4  | 5  | 4  | 3  | 5  | 9  | 5  | 6  | 6  | 5  |   |
| ENSP00000376150,ENSP000  | ENSG00000141526  | SLC16A3      | 70  | 0  | 1  | 0  | 3  | 4  | 4  | 3  | 1  | 2  | 4  | 4  | 4  | 1  | 0  | 2  | 4  | 10 | 5  | 0  | 0  | 0  | 2  | 0  | 1  | 4  | 2  | 2  | 1  | 2  | 4  |   |
| ENSP00000376176,R16G     | ENSG00000132341  | RAN          | 274 | 16 | 7  | 8  | 7  | 12 | 9  | 9  | 8  | 6  | 8  | 1  | 7  | 7  | 8  | 6  | 9  | 13 | 9  | 11 | 14 | 10 | 9  | 5  | 6  | 12 | 14 | 10 | 16 | 9  | 8  |   |
| ENSP00000376233          | ENSG00000198836  | OPA1         | 47  | 2  | 1  | 1  | 1  | 2  | 1  | 2  | 2  | 1  | 3  | 1  | 1  | 3  | 2  | 1  | 1  | 1  | 0  | 2  | 3  | 3  | 1  | 0  | 0  | 2  | 1  | 1  | 4  | 3  | 1  |   |
| ENSP00000376250,ENSP000  | ENSG00000152492  | CCDC50       | 41  | 1  | 2  | 1  | 0  | 1  | 0  | 1  | 2  | 1  | 0  | 1  | 0  | 0  | 2  | 0  | 1  | 5  | 0  | 1  | 2  | 1  | 1  | 2  | 2  | 2  | 1  | 1  | 3  | 5  | 2  |   |
| ENSP00000376252,ENSP000  | ENSG00000130779  | CLIP1        | 162 | 7  | 6  | 4  | 5  | 2  | 4  | 9  | 6  | 3  | 2  | 0  | 2  | 6  | 5  | 3  | 5  | 2  | 5  | 10 | 18 | 8  | 4  | 4  | 3  | 3  | 6  | 2  | 8  | 11 | 9  |   |
| ENSP00000376306,ENSP000  | ENSG00000122966  | CIT          | 43  | 3  | 3  | 1  | 7  | 1  | 0  | 3  | 0  | 1  | 2  | 1  | 1  | 0  | 1  | 1  | 0  | 1  | 0  | 4  | 1  | 2  | 2  | 3  | 2  | 1  | 0  | 0  | 1  | 0  | 1  |   |
| ENSP00000376309          | ENSG00000170144  | HNRNP3A      | 878 | 38 | 18 | 19 | 23 | 34 | 25 | 31 | 22 | 22 | 53 | 14 | 27 | 26 | 19 | 27 | 37 | 42 | 22 | 34 | 31 | 27 | 44 | 19 | 26 | 47 | 34 | 27 | 42 | 24 | 24 |   |
| ENSP00000376317,ENSP000  | ENSG00000135090  | TAO3C        | 52  | 3  | 1  | 1  | 6  | 4  | 2  | 1  | 0  | 0  | 0  | 0  | 1  | 2  | 1  | 0  | 1  | 4  | 2  | 1  | 2  | 2  | 5  | 1  | 1  | 2  | 4  | 0  | 2  | 2  | 1  |   |
| ENSP00000376328          | ENSG00000108892  | TESC         | 12  | 0  | 0  | 0  | 0  | 0  | 0  | 2  | 0  | 0  | 0  | 0  | 0  | 0  | 0  | 0  | 0  | 0  | 0  | 1  | 1  | 2  | 0  | 0  | 0  | 0  | 1  | 0  | 1  | 0  | 3  |   |
| ENSP00000376363_A229V    | ENSG00000128708  | HATP1        | 110 | 4  | 4  | 3  | 3  | 4  | 1  | 3  | 0  | 4  | 6  | 3  | 3  | 2  | 2  | 3  | 5  | 4  | 4  | 2  | 5  | 4  | 5  | 3  | 1  | 6  | 4  | 3  | 9  | 3  | 7  |   |
| ENSP00000376405,ENSP000  | ENSG00000170412  | GNRCS5C      | 25  | 2  | 1  | 2  | 2  | 0  | 1  | 2  | 1  | 1  | 2  | 1  | 2  | 0  | 0  | 0  | 0  | 0  | 0  | 0  | 0  | 0  | 0  | 2  | 2  | 1  | 0  | 3  | 0  | 0  | 0  |   |
| ENSP00000376410,ENSP000  | ENSG00000203485  | INF2         | 180 | 1  | 0  | 1  | 8  | 3  | 5  | 13 | 11 | 16 | 14 | 15 | 5  | 6  | 6  | 4  | 7  | 0  | 0  | 2  | 7  | 9  | 11 | 10 | 4  | 6  | 12 | 6  | 9  | 3  | 0  |   |
| ENSP00000376414,D471Y    | ENSG00000114416  | FXR1         | 251 | 12 | 12 | 3  | 6  | 5  | 4  | 7  | 6  | 5  | 13 | 9  | 7  | 8  | 15 | 11 | 18 | 11 | 11 | 12 | 11 | 12 | 7  | 7  | 2  | 2  | 2  | 6  | 9  | 7  | 0  |   |
| ENSP00000376457,ENSP000  | ENSG00000114346  | ECT2         | 72  | 0  | 0  | 1  | 1  | 0  | 1  | 1  | 0  | 1  | 1  | 0  | 0  | 1  | 0  | 1  | 0  | 0  | 0  | 0  | 0  | 1  | 1  | 1  | 1  | 0  | 0  | 0  | 0  | 0  | 0  |   |
| ENSP00000376465          | ENSG00000115339  | GALNT3       | 77  | 2  | 0  | 1  | 4  | 8  | 3  | 11 | 2  | 6  | 1  | 1  | 1  | 4  | 3  | 5  | 0  | 0  | 3  | 5  | 1  | 4  | 2  | 4  | 2  | 1  | 3  | 0  | 0  | 0  | 0  |   |
| ENSP00000376472          | ENSG00000134910  | STT3A        | 118 | 9  | 6  | 4  | 3  | 6  | 4  | 5  | 5  | 3  | 4  | 3  | 3  | 5  | 8  | 2  | 5  | 4  | 1  | 4  | 4  | 3  | 4  | 4  | 2  | 4  | 2  | 3  | 2  | 2  | 2  |   |
| ENSP00000376478,ENSP000  | ENSG00000082438  | COBLL1       | 19  | 0  | 0  | 1  | 1  | 2  | 1  | 0  | 2  | 2  | 0  | 0  | 0  | 0  | 0  | 0  | 0  | 0  | 0  | 2  | 1  | 1  | 1  | 0  | 1  | 1  | 1  | 1  | 0  | 1  | 0  |   |
| ENSP00000376514,ENSP000  | ENSG00000184863  | RBM33        | 14  | 1  | 1  | 0  | 1  | 0  | 2  | 0  | 0  | 0  | 1  | 2  | 0  | 0  | 0  | 0  | 1  | 0  | 0  | 0  | 2  | 0  |    |    |    |    |    |    |    |    |    |   |

[illegible]

|                                                                                                                                                                                                                                                                                                                                                                                                                                                                                                                                                                                                                                                                                                                                                                                                                                                                                                                                                                                                                                                                                                                                                                                                                                                                                                                                                                                                                                                                                                                                                                                                                                                                                                                                                                                                                                                                                                                                                                                                                                                                                                                                |                                                                                                                                                                                                                                                                                                                                                                                                                                                                                                                                                                                                                                                                                                                                                                                                                                                                |                                                                                                                                                                                                                                                                                                                                                                                                                                                                       |   |   |   |   |   |    |    |    |   |   |   |   |   |   |   |   |    |    |    |    |   |    |    |   |    |   |
|--------------------------------------------------------------------------------------------------------------------------------------------------------------------------------------------------------------------------------------------------------------------------------------------------------------------------------------------------------------------------------------------------------------------------------------------------------------------------------------------------------------------------------------------------------------------------------------------------------------------------------------------------------------------------------------------------------------------------------------------------------------------------------------------------------------------------------------------------------------------------------------------------------------------------------------------------------------------------------------------------------------------------------------------------------------------------------------------------------------------------------------------------------------------------------------------------------------------------------------------------------------------------------------------------------------------------------------------------------------------------------------------------------------------------------------------------------------------------------------------------------------------------------------------------------------------------------------------------------------------------------------------------------------------------------------------------------------------------------------------------------------------------------------------------------------------------------------------------------------------------------------------------------------------------------------------------------------------------------------------------------------------------------------------------------------------------------------------------------------------------------|----------------------------------------------------------------------------------------------------------------------------------------------------------------------------------------------------------------------------------------------------------------------------------------------------------------------------------------------------------------------------------------------------------------------------------------------------------------------------------------------------------------------------------------------------------------------------------------------------------------------------------------------------------------------------------------------------------------------------------------------------------------------------------------------------------------------------------------------------------------|-----------------------------------------------------------------------------------------------------------------------------------------------------------------------------------------------------------------------------------------------------------------------------------------------------------------------------------------------------------------------------------------------------------------------------------------------------------------------|---|---|---|---|---|----|----|----|---|---|---|---|---|---|---|---|----|----|----|----|---|----|----|---|----|---|
| ENSP00000385154, ENSP00000385158, ENSP00000385165                                                                                                                                                                                                                                                                                                                                                                                                                                                                                                                                                                                                                                                                                                                                                                                                                                                                                                                                                                                                                                                                                                                                                                                                                                                                                                                                                                                                                                                                                                                                                                                                                                                                                                                                                                                                                                                                                                                                                                                                                                                                              | ENSG00000185838<br>ENSG00000170264<br>ENSG00000185165                                                                                                                                                                                                                                                                                                                                                                                                                                                                                                                                                                                                                                                                                                                                                                                                          | GNB1L<br>FAM161A                                                                                                                                                                                                                                                                                                                                                                                                                                                      |   |   |   |   |   |    |    |    |   |   |   |   |   |   |   |   |    |    |    |    |   |    |    |   |    |   |
| ENSP00000385215, ENSP00000385219, ENSP00000385249, ENSP00000385469, ENSP00000385476, ENSP00000386061, ENSP00000386132, ENSP00000386153, ENSP00000386177, ENSP00000386239, ENSP00000386247, ENSP00000386250, ENSP00000386328, ENSP00000386388, ENSP00000386423, ENSP00000386439, ENSP00000386455, ENSP00000386465, ENSP00000386474, ENSP00000386538, ENSP00000386541, ENSP00000386552, ENSP00000386601, ENSP00000386614, ENSP00000386645, ENSP00000386672, ENSP00000386692, ENSP00000386735, ENSP00000386758, ENSP00000386775, ENSP00000386786, ENSP00000386813, ENSP00000386831, ENSP00000386850, ENSP00000386935, ENSP00000387003, ENSP00000387070, ENSP00000387085, ENSP00000387100, ENSP00000387101, ENSP00000387183, ENSP00000387257, ENSP00000387268, ENSP00000387270, ENSP00000387272, rev_ENSP00000001700, rev_ENSP00000001694, rev_ENSP00000001700, rev_ENSP00000003307, rev_ENSP000000040738, rev_ENSP000000055163, rev_ENSP000000017965, rev_ENSP0000000195419, rev_ENSP0000000195654, rev_ENSP0000000198939, rev_ENSP0000000203616, rev_ENSP0000000205194, rev_ENSP0000000205386_K103N, rev_ENSP0000000210444, rev_ENSP0000000216181, rev_ENSP0000000216774, rev_ENSP0000000216832, rev_ENSP0000000216951, rev_ENSP0000000217372, rev_ENSP0000000219084, rev_ENSP0000000220496, rev_ENSP0000000220959, rev_ENSP0000000221232, rev_ENSP0000000224140, rev_ENSP0000000225428, rev_ENSP0000000226207, rev_ENSP0000000228284, rev_ENSP0000000230340, rev_ENSP0000000230902, rev_ENSP0000000234420, rev_ENSP0000000234739, rev_ENSP0000000236925, rev_ENSP0000000236995, rev_ENSP0000000237364, rev_ENSP0000000237530, rev_ENSP0000000237724, rev_ENSP0000000242848, rev_ENSP0000000243326, rev_ENSP0000000244020, rev_ENSP0000000244364, rev_ENSP0000000245441, rev_ENSP0000000245932, rev_ENSP0000000246533, rev_ENSP0000000247001, rev_ENSP0000000248929, rev_ENSP0000000249367, rev_ENSP0000000249837, rev_ENSP0000000251143, rev_ENSP0000000252050, rev_ENSP0000000252477, rev_ENSP0000000252452, rev_ENSP0000000252692, rev_ENSP0000000253339, rev_ENSP0000000254821, rev_ENSP0000000254898, rev_ENSP0000000255194 | ENSG00000135315<br>ENSG00000184792<br>ENSG00000183336<br>ENSG00000115970<br>ENSG00000119888<br>ENSG0000013761<br>ENSG00000204637<br>ENSG00000175333<br>ENSG00000119870<br>ENSG00000221978<br>ENSG00000138698<br>ENSG00000100320<br>ENSG00000160949<br>ENSG00000152404<br>ENSG00000152076<br>ENSG0000013827<br>ENSG00000162520<br>ENSG00000119041<br>ENSG00000162921<br>ENSG00000115233<br>ENSG00000005436<br>ENSG00000163939<br>ENSG00000091409<br>ENSG00000138069<br>ENSG00000173933<br>ENSG00000122566<br>ENSG00000176407<br>ENSG00000196975<br>ENSG00000181555<br>ENSG00000196604<br>ENSG00000075292<br>ENSG00000157827<br>ENSG00000169994<br>ENSG00000193305<br>ENSG00000122305<br>ENSG00000204120<br>ENSG00000204316<br>ENSG00000176058<br>ENSG00000115541<br>ENSG00000186854<br>ENSG00000144395<br>ENSG00000187514<br>ENSG00000204843<br>ENSG00000153201 | KIAA1009<br>OSBP2<br>ODZ3<br>THADA<br>EPCAM<br>RPL17P33, RPL3Cof10<br>CNCL2<br>RAP1GDS1<br>RBM9<br>NFKBIL2<br>CWF19L2<br>CDC47<br>TRIP12<br>POLR1A<br>SYNC<br>GTFC3C<br>BZW1P1, BZW1<br>TBCID108<br>PSMD14<br>C2orf3<br>PBPM1<br>ITGA6<br>PTMAP4, PTM1<br>RAB1A<br>RBM14, RBM4<br>HNRNPAA2B1<br>KCMF1<br>ANXA4<br>SETD5<br>POTEF<br>ZNFE638<br>FMNL2<br>MYO7B<br>UAP111<br>IMMT<br>GIGYF2<br>MRPL38<br>C9orf75<br>HSPE1<br>CCDC150<br>PTMAP4, PTM1<br>DCTN1<br>RANBP2 |   |   |   |   |   |    |    |    |   |   |   |   |   |   |   |   |    |    |    |    |   |    |    |   |    |   |
| 17                                                                                                                                                                                                                                                                                                                                                                                                                                                                                                                                                                                                                                                                                                                                                                                                                                                                                                                                                                                                                                                                                                                                                                                                                                                                                                                                                                                                                                                                                                                                                                                                                                                                                                                                                                                                                                                                                                                                                                                                                                                                                                                             | 1                                                                                                                                                                                                                                                                                                                                                                                                                                                                                                                                                                                                                                                                                                                                                                                                                                                              | 0                                                                                                                                                                                                                                                                                                                                                                                                                                                                     | 0 | 1 | 1 | 1 | 2 | 2  | 1  | 0  | 0 | 0 | 0 | 0 | 0 | 1 | 1 | 1 | 0  | 1  | 0  | 1  | 0 | 2  | 0  | 0 | 0  | 0 |
| 26                                                                                                                                                                                                                                                                                                                                                                                                                                                                                                                                                                                                                                                                                                                                                                                                                                                                                                                                                                                                                                                                                                                                                                                                                                                                                                                                                                                                                                                                                                                                                                                                                                                                                                                                                                                                                                                                                                                                                                                                                                                                                                                             | 3                                                                                                                                                                                                                                                                                                                                                                                                                                                                                                                                                                                                                                                                                                                                                                                                                                                              | 0                                                                                                                                                                                                                                                                                                                                                                                                                                                                     | 0 | 1 | 1 | 0 | 2 | 1  | 0  | 1  | 0 | 0 | 1 | 0 | 0 | 0 | 0 | 0 | 0  | 0  | 3  | 1  | 1 | 0  | 1  | 1 | 0  | 1 |
| 13                                                                                                                                                                                                                                                                                                                                                                                                                                                                                                                                                                                                                                                                                                                                                                                                                                                                                                                                                                                                                                                                                                                                                                                                                                                                                                                                                                                                                                                                                                                                                                                                                                                                                                                                                                                                                                                                                                                                                                                                                                                                                                                             | 0                                                                                                                                                                                                                                                                                                                                                                                                                                                                                                                                                                                                                                                                                                                                                                                                                                                              | 0                                                                                                                                                                                                                                                                                                                                                                                                                                                                     | 1 | 0 | 1 | 0 | 0 | 0  | 0  | 2  | 0 | 0 | 0 | 0 | 2 | 0 | 0 | 1 | 0  | 0  | 0  | 1  | 1 | 0  | 2  | 1 | 0  | 1 |
| 17                                                                                                                                                                                                                                                                                                                                                                                                                                                                                                                                                                                                                                                                                                                                                                                                                                                                                                                                                                                                                                                                                                                                                                                                                                                                                                                                                                                                                                                                                                                                                                                                                                                                                                                                                                                                                                                                                                                                                                                                                                                                                                                             | 0                                                                                                                                                                                                                                                                                                                                                                                                                                                                                                                                                                                                                                                                                                                                                                                                                                                              | 0                                                                                                                                                                                                                                                                                                                                                                                                                                                                     | 0 | 1 | 0 | 0 | 1 | 2  | 1  | 1  | 0 | 0 | 0 | 1 | 1 | 0 | 1 | 2 | 0  | 0  | 0  | 0  | 1 | 1  | 1  | 2 | 0  | 1 |
| 25                                                                                                                                                                                                                                                                                                                                                                                                                                                                                                                                                                                                                                                                                                                                                                                                                                                                                                                                                                                                                                                                                                                                                                                                                                                                                                                                                                                                                                                                                                                                                                                                                                                                                                                                                                                                                                                                                                                                                                                                                                                                                                                             | 1                                                                                                                                                                                                                                                                                                                                                                                                                                                                                                                                                                                                                                                                                                                                                                                                                                                              | 3                                                                                                                                                                                                                                                                                                                                                                                                                                                                     | 1 | 0 | 0 | 0 | 0 | 0  | 0  | 0  | 0 | 0 | 2 | 2 | 0 | 0 | 5 | 3 | 6  | 0  | 0  | 0  | 2 | 0  | 0  | 0 | 0  |   |
| 10                                                                                                                                                                                                                                                                                                                                                                                                                                                                                                                                                                                                                                                                                                                                                                                                                                                                                                                                                                                                                                                                                                                                                                                                                                                                                                                                                                                                                                                                                                                                                                                                                                                                                                                                                                                                                                                                                                                                                                                                                                                                                                                             | 1                                                                                                                                                                                                                                                                                                                                                                                                                                                                                                                                                                                                                                                                                                                                                                                                                                                              | 0                                                                                                                                                                                                                                                                                                                                                                                                                                                                     | 0 | 0 | 1 | 1 | 1 | 0  | 0  | 1  | 0 | 0 | 1 | 0 | 0 | 0 | 1 | 0 | 0  | 0  | 0  | 0  | 1 | 0  | 2  | 0 | 0  |   |
| 224                                                                                                                                                                                                                                                                                                                                                                                                                                                                                                                                                                                                                                                                                                                                                                                                                                                                                                                                                                                                                                                                                                                                                                                                                                                                                                                                                                                                                                                                                                                                                                                                                                                                                                                                                                                                                                                                                                                                                                                                                                                                                                                            | 5                                                                                                                                                                                                                                                                                                                                                                                                                                                                                                                                                                                                                                                                                                                                                                                                                                                              | 2                                                                                                                                                                                                                                                                                                                                                                                                                                                                     | 5 | 3 | 3 | 6 | 5 | 10 | 10 | 11 | 3 | 5 | 6 | 4 | 9 | 5 | 4 | 7 | 10 | 15 | 13 | 18 | 9 | 13 | 16 | 8 | 18 | 0 |
| 14                                                                                                                                                                                                                                                                                                                                                                                                                                                                                                                                                                                                                                                                                                                                                                                                                                                                                                                                                                                                                                                                                                                                                                                                                                                                                                                                                                                                                                                                                                                                                                                                                                                                                                                                                                                                                                                                                                                                                                                                                                                                                                                             | 0                                                                                                                                                                                                                                                                                                                                                                                                                                                                                                                                                                                                                                                                                                                                                                                                                                                              | 0                                                                                                                                                                                                                                                                                                                                                                                                                                                                     | 0 | 0 | 1 | 0 | 0 | 0  | 0  | 0  | 0 | 0 | 0 | 0 | 0 | 0 | 2 | 0 | 1  | 0  | 1  | 0  | 0 | 2  | 0  | 2 | 3  |   |
| 27                                                                                                                                                                                                                                                                                                                                                                                                                                                                                                                                                                                                                                                                                                                                                                                                                                                                                                                                                                                                                                                                                                                                                                                                                                                                                                                                                                                                                                                                                                                                                                                                                                                                                                                                                                                                                                                                                                                                                                                                                                                                                                                             | 1                                                                                                                                                                                                                                                                                                                                                                                                                                                                                                                                                                                                                                                                                                                                                                                                                                                              | 0                                                                                                                                                                                                                                                                                                                                                                                                                                                                     | 2 |   |   |   |   |    |    |    |   |   |   |   |   |   |   |   |    |    |    |    |   |    |    |   |    |   |

rev\_ENSP00000255882  
rev\_ENSP00000256398  
rev\_ENSP00000256458  
rev\_ENSP00000256707  
rev\_ENSP00000257287  
rev\_ENSP00000257626  
rev\_ENSP00000258428  
rev\_ENSP00000258530  
rev\_ENSP00000259075  
rev\_ENSP00000259335  
rev\_ENSP00000259351  
rev\_ENSP00000259371  
rev\_ENSP00000260147  
rev\_ENSP00000260970  
rev\_ENSP00000261303  
rev\_ENSP00000261424  
rev\_ENSP00000261435  
rev\_ENSP00000261535  
rev\_ENSP00000261588  
rev\_ENSP00000261622  
rev\_ENSP00000261678  
rev\_ENSP00000261812  
rev\_ENSP00000261819  
rev\_ENSP00000261833  
rev\_ENSP00000261887  
rev\_ENSP00000261973  
rev\_ENSP00000262173  
rev\_ENSP00000262210  
rev\_ENSP00000262360  
rev\_ENSP00000262360\_rs3808782-R562C  
rev\_ENSP00000262367  
rev\_ENSP00000262410  
rev\_ENSP00000262429  
rev\_ENSP00000262477  
rev\_ENSP00000262577  
rev\_ENSP00000262707  
rev\_ENSP00000262731  
rev\_ENSP00000262887  
rev\_ENSP00000263062  
rev\_ENSP00000263273  
rev\_ENSP00000263436  
rev\_ENSP00000263441  
rev\_ENSP00000263650  
rev\_ENSP00000263674  
rev\_ENSP00000263710  
rev\_ENSP00000263904  
rev\_ENSP00000264122  
rev\_ENSP00000264211  
rev\_ENSP00000264229  
rev\_ENSP00000264331  
rev\_ENSP00000264346  
rev\_ENSP00000264501  
rev\_ENSP00000264546  
rev\_ENSP00000264555  
rev\_ENSP00000264779  
rev\_ENSP00000264827  
rev\_ENSP00000265335  
rev\_ENSP00000265343  
rev\_ENSP00000265348  
rev\_ENSP00000265368\_rs2147377-R7302V  
rev\_ENSP00000265753  
rev\_ENSP00000265986  
rev\_ENSP00000266022  
rev\_ENSP00000266070  
rev\_ENSP00000266546  
rev\_ENSP00000268712  
rev\_ENSP00000268852  
rev\_ENSP00000269064  
rev\_ENSP00000271636  
rev\_ENSP00000272797  
rev\_ENSP00000273176  
rev\_ENSP00000273600  
rev\_ENSP00000274289  
rev\_ENSP00000275230  
rev\_ENSP00000278935  
rev\_ENSP00000279873  
rev\_ENSP00000280333  
rev\_ENSP00000281111  
rev\_ENSP00000281445  
rev\_ENSP00000281578  
rev\_ENSP00000281923  
rev\_ENSP00000282469  
rev\_ENSP00000283122  
rev\_ENSP00000284395  
rev\_ENSP00000284637  
rev\_ENSP00000286070  
rev\_ENSP00000286398  
rev\_ENSP00000287936  
rev\_ENSP00000288373  
rev\_ENSP00000289893  
rev\_ENSP00000290209  
rev\_ENSP00000290650  
rev\_ENSP00000291107  
rev\_ENSP00000291906  
rev\_ENSP00000292205  
rev\_ENSP00000293709  
rev\_ENSP00000294678  
rev\_ENSP00000294905  
rev\_ENSP00000295559  
rev\_ENSP00000295888  
rev\_ENSP00000296126  
rev\_ENSP00000296647  
rev\_ENSP00000297183  
rev\_ENSP00000298281  
rev\_ENSP00000299183  
rev\_ENSP00000299767

16 1 0 1 1 1 2 1 0 2 0 0 0 1 0 0 0 0 0 1 0 0 2 0 0 2 0 0 0  
23 1 0 0 0 0 3 0 0 0 0 0 0 0 1 0 1 0 1 4 0 3 3 0 0 0 2 2 0 0 2 0  
10 1 2 1 0 0 2 0 1 0 0 0 0 0 0 0 0 0 1 1 0 0 0 0 1 0 0 0 0 0 0  
18 2 1 1 0 1 0 0 0 0 0 0 0 0 0 0 2 0 1 0 1 1 1 0 2 1 1 0 2 0 1 1 0  
14 0 1 0 0 0 0 0 0 1 1 0 1 1 2 0 1 0 0 1 1 1 0 1 0 1 1 1 1 0 0 0 0  
15 0 1 0 2 1 2 0 0 0 0 0 0 0 1 3 0 0 0 0 2 1 0 0 0 0 0 0 0 0 1 1  
15 0 0 0 0 0 0 0 1 0 1 0 1 0 0 0 0 0 0 0 0 0 0 1 0 2 7 1 1 0 0 0 1 0  
12 1 0 0 1 0 1 1 1 0 0 0 0 0 0 0 0 1 1 0 0 0 1 0 0 0 1 0 0 1 1 2 0 0 0  
19 0 0 0 3 0 1 2 1 0 1 0 1 0 0 0 0 1 0 1 1 0 0 0 0 0 1 1 2 2 1 1 0 0  
12 0 0 1 1 0 0 1 0 0 1 0 0 1 0 0 0 0 0 1 1 1 1 1 1 2 1 0 0 0 0 0 0  
13 0 0 1 0 0 1 0 0 1 0 0 1 0 0 0 0 1 0 0 0 0 0 0 0 1 2 1 1 1 2 0 1 0 0  
10 0 0 0 1 0 0 1 0 0 1 0 0 0 0 1 0 0 0 0 0 0 0 0 1 2 1 0 0 1 0 0 1 0  
16 1 0 0 0 0 0 0 0 0 0 2 2 0 0 0 1 1 1 0 2 2 2 0 0 0 1 0 0 1 0 0 0 0  
10 0 1 1 1 0 0 0 0 1 0 0 0 1 0 0 0 1 0 1 0 1 0 0 0 0 1 0 0 0 1 0 1 0  
10 0 0 0 1 0 2 1 0 0 0 0 0 0 0 0 0 1 0 0 0 1 0 0 0 0 0 0 1 2 0 0 0 1  
16 2 0 1 0 1 1 0 0 0 1 0 0 1 0 0 0 0 0 2 0 0 2 0 0 2 0 1 1 0 1 1 0 0  
25 3 0 2 1 1 3 0 0 0 1 2 0 1 0 1 0 0 0 1 1 0 0 1 1 0 0 2 1 1 0 2 1 0 0  
56 4 4 0 5 2 1 3 3 2 2 0 4 3 0 2 0 3 2 2 4 0 2 3 2 1 1 1 0 0 0 0  
14 1 1 0 0 4 0 0 0 1 0 0 0 0 0 0 1 1 0 0 1 0 0 0 0 0 0 0 2 0 0 0 1 1  
13 0 1 1 0 0 0 0 0 0 0 1 1 0 1 0 0 0 0 0 0 0 0 1 0 0 2 1 0 1 1 1 1 0  
15 0 0 2 0 0 0 1 0 0 1 0 0 1 0 0 0 0 0 0 0 0 1 3 2 2 1 1 0 1 0 0 0 0  
13 0 0 0 1 2 1 0 0 1 1 1 0 0 0 0 0 0 0 0 0 0 0 0 0 0 2 0 1 1 1 1 0 0  
16 0 0 2 0 0 1 0 0 1 1 1 1 0 0 0 1 0 0 0 0 0 0 0 0 0 1 1 2 0 2 1 0 1  
60 1 4 3 0 4 1 3 3 2 0 2 0 2 2 0 1 4 1 4 3 0 3 1 1 5 3 1 2 3 1  
10 0 2 0 0 1 0 1 0 1 1 0 0 0 0 0 1 0 0 0 1 0 0 0 0 0 1 0 0 0 0 0 1  
10 0 1 0 0 2 1 0 0 0 0 2 0 0 0 0 1 0 0 0 0 0 0 0 0 0 0 0 1 0 1 0 1  
11 0 0 0 0 0 0 0 0 0 0 1 0 0 0 0 0 0 0 0 1 1 0 0 0 2 1 0 1 0 4 0 0 0  
11 1 0 0 2 0 0 0 0 0 0 2 2 0 0 0 0 1 0 0 0 0 0 1 1 0 0 0 0 0 1 0 0 0  
27 2 2 1 3 3 1 1 1 2 0 0 0 0 2 1 0 0 0 0 3 1 0 0 0 0 0 0 0 0 1 3  
27 3 2 1 3 3 1 1 1 2 0 0 0 0 2 1 0 0 0 0 2 1 0 0 0 0 0 0 0 0 1 3  
13 0 0 1 1 0 0 1 0 0 1 0 0 0 0 0 1 0 1 1 1 1 1 0 1 1 0 0 0 1 0 0 0  
11 0 0 0 0 0 0 0 0 0 0 0 0 0 0 0 2 2 1 1 1 0 0 1 1 1 0 0 0 0 0 0 0  
12 2 2 1 0 0 0 0 0 1 1 1 1 0 0 0 0 0 0 0 0 0 0 1 0 0 0 1 0 0 0 0  
11 0 0 1 0 0 0 0 0 0 0 0 2 0 0 0 0 0 1 0 1 0 1 0 1 3 0 0 0 0 0 2 0  
10 1 0 1 0 0 0 0 0 1 0 0 1 0 1 0 1 0 0 0 0 0 2 0 0 0 0 0 1 0 0 0 1  
15 0 0 1 0 0 0 0 0 0 1 1 0 1 0 1 0 0 0 0 0 0 2 1 1 1 0 1 1 1 2 1 0  
12 0 0 0 0 0 1 1 0 1 0 1 0 1 0 0 1 0 1 0 0 0 1 2 0 1 0 1 0 0 1 0  
10 0 0 0 0 0 0 0 2 0 1 1 0 1 1 0 0 0 0 0 0 0 0 0 0 0 0 0 0 0 0  
21 1 0 1 1 1 1 1 0 0 0 0 1 0 1 1 0 1 1 1 1 1 0 0 0 1 0 1 2 0 1 1  
10 0 1 1 0 0 0 0 0 1 1 1 1 0 0 0 0 0 0 0 0 0 0 1 1 0 0 2 0 0 0 0  
11 0 0 0 0 0 0 0 0 0 0 2 0 0 0 0 2 1 0 0 0 1 1 1 1 2 0 0 0 0 0 0 0  
12 0 0 0 0 0 1 0 1 0 0 0 0 0 0 0 1 1 0 0 0 0 3 0 2 0 0 1 1 0 1 0 0  
10 0 1 0 0 0 0 0 0 0 0 2 0 0 1 0 0 0 0 1 1 0 1 0 0 0 0 1 1 0 0 1  
12 1 0 1 0 0 0 0 0 0 0 1 0 0 0 0 1 1 1 0 0 1 0 1 1 0 0 1 2 0 0 0  
12 0 0 0 0 0 1 1 0 0 0 0 0 1 0 0 0 0 1 2 1 0 1 0 0 0 1 1 0 0 0 1 1  
15 2 0 1 0 2 0 0 0 0 0 0 0 0 0 0 1 0 1 1 1 0 0 0 0 1 0 1 2 0 0 1 1  
10 0 1 1 1 0 0 0 0 0 0 2 0 0 1 0 0 0 0 0 0 0 0 1 0 2 0 0 1 0 0 0  
11 1 0 0 0 0 0 0 0 0 1 0 0 0 0 0 0 0 1 1 0 0 0 0 1 0 1 2 1 1 0 1  
52 5 7 0 2 0 1 0 0 3 1 4 1 2 1 1 1 1 3 1 1 0 3 1 2 3 3 0 2 3  
20 1 0 1 0 0 0 1 3 0 0 0 0 0 0 0 0 2 2 1 0 1 2 0 1 1 1 0 1 1 1  
43 4 0 1 1 0 2 3 0 1 1 1 1 0 1 1 4 1 0 2 3 1 2 5 0 1 3 1 1 2 0 1  
23 1 2 0 0 0 1 0 1 0 1 1 1 1 1 2 1 1 1 1 2 1 0 0 0 1 2 0 0 0 0  
25 2 0 2 0 0 0 0 0 0 1 0 0 0 0 2 2 0 3 1 2 1 2 1 1 1 0 1 0 1 1 1  
20 1 1 0 0 1 0 0 0 0 1 0 1 0 0 0 0 0 2 0 0 0 1 0 1 1 2 2 1 2 0 1 2 1  
12 0 1 1 1 0 1 0 0 0 0 0 0 0 0 1 2 0 0 0 0 0 0 1 0 2 0 0 0 0 0 2  
11 3 1 1 1 0 0 0 0 0 0 0 0 0 0 0 1 2 0 0 0 0 1 0 0 0 0 0 0 0 0 1  
12 0 1 1 0 0 0 0 0 1 0 0 0 0 0 0 0 1 0 0 0 0 2 1 1 0 0 0 0 2 2  
15 1 0 0 2 1 1 1 0 1 0 0 0 0 0 1 0 1 1 0 2 1 0 0 0 0 1 0 0 0 0 1  
29 2 2 2 0 0 0 0 0 0 3 0 1 0 0 0 4 2 3 0 0 0 0 0 0 0 0 0 3 5 2  
11 0 0 0 0 0 1 0 0 0 0 0 1 0 0 2 1 1 0 0 0 0 0 0 0 1 0 1 1 1 0 1  
14 1 0 0 1 0 1 0 0 0 0 0 0 0 0 1 0 0 0 0 0 1 0 3 0 1 1 0 0 2 1 1  
31 3 0 3 1 1 0 3 0 0 2 0 1 1 0 0 0 0 1 4 0 2 1 0 2 1 0 1 1 2 1  
20 1 0 1 1 2 0 1 0 2 1 0 1 0 0 0 0 1 1 1 1 2 0 3 0 0 0 0 0 1 1 0  
11 1 0 1 0 1 0 0 1 0 0 0 0 0 0 0 0 0 0 1 1 0 2 6 5 0 2 0 1 0 0 2  
20 1 2 0 0 2 0 1 1 0 2 1 1 1 1 0 1 1 1 0 1 0 0 0 1 0 0 1 0 1 0  
12 0 0 0 0 0 1 1 3 1 0 0 0 0 0 0 0 0 0 1 0 1 0 1 0 2 0 2 0 0 0 0  
21 0 0 1 0 0 1 2 1 1 0 0 0 0 0 0 0 1 1 3 2 2 1 0 0 0 1 0 2 2 0 0 0  
13 0 0 0 2 1 0 0 0 0 0 2 0 1 1 0 0 1 1 1 1 1 0 0 0 0 0 0 0 0 1  
17 1 0 0 0 3 0 1 0 0 0 0 0 0 0 0 2 0 0 0 2 1 0 0 0 2 1 0 2 2 0 0  
33 0 0 0 0 0 3 4 2 0 0 0 2 3 2 0 0 0 4 4 3 0 0 0 0 0 0 0 1 3 2  
23 1 0 0 2 2 1 1 0 0 0 1 1 0 0 0 0 2 1 1 2 1 1 0 0 1 2 1 1 0 0 1  
10 0 0 0 0 1 0 1 0 2 0 0 0 0 0 0 0 2 0 0 0 0 0 0 0 0 2 1 0 0 1  
17 2 0 0 0 1 0 0 0 0 0 1 0 0 0 0 0 0 1 1 0 1 0 2 2 1 1 1 0 0 1 0  
54 2 3 2 2 2 1 2 4 1 2 1 2 2 2 0 2 0 2 3 3 2 1 2 2 1 2 1 3 1 2  
15 1 1 0 1 1 0 0 0 0 1 0 1 0 1 0 1 0 1 0 1 0 1 0 0 1 0 1 1 0 1 1  
10 0 0 0 0 0 0 1 0 0 0 0 0 0 0 1 0 0 1 0 0 0 1 1 2 1 0 0 0 0 1  
13 0 0 0 1 0 1 0 0 0 2 0 1 0 0 1 0 0 0 2 1 0 1 0 0 0 1 0 1 0 0 1  
23 0 0 0 0 4 0 2 2 1 0 0 0 1 0 0 0 3 1 2 0 0 0 0 0 0 0 0 0 2 3 2  
14 1 0 1 0 0 1 0 1 1 1 0 0 0 0 1 0 0 0 2 0 0 0 1 0 0 2 0 0 0 1  
22 0 0 0 0 0 0 0 1 0 0 0 0 0 0 1 0 0 2 3 3 0 1 2 1 1 2 1 2 0 0 1  
14 2 1 0 1 0 0 0 0 0 1 0 0 0 0 1 0 0 0 1 1 1 1 1 1 0 1 0 0 0 1 0  
10 1 0 0 1 0 0 0 1 0 1 0 1 0 0 0 0 0 1 1 0 0 0 1 1 0 1 0 0 0 0 1  
10 0 3 0 0 1 0 0 1 0 0 3 0 0 0 0 0 0 0 0 0 0 0 0 2 0 0 0 0 0 0  
13 0 0 0 1 2 0 0 0 1 1 1 0 0 0 0 1 1 0 1 0 1 0 1 2 1 0 0 0 0 0 0  
14 0 0 0 0 1 0 1 0 1 0 0 0 0 0 1 1 0 2 0 0 0 0 1 2 0 1 0 0 1 1 0  
13 1 0 0 0 1 0 2 0 1 1 0 0 1 0 0 0 0 1 0 0 0 2 1 0 0 0 0 1 1 0 0  
14 2 0 0 0 0 0 0 0 0 0 1 0 0 0 0 1 2 0 0 0 0 1 1 2 1 2 0 2 0 0 0  
16 1 0 0 0 1 2 0 0 0 2 0 0 0 0 0 0 0 0 0 0 0 1 2 0 2 0 2 0 1 1 0  
11 0 0 0 1 0 1 0 0 0 0 0 0 0 0 1 1 0 0 0 0 1 0 1 0 0 1 1 0 1 1 0  
11 1 0 1 0 0 0 0 0 0 0 0 1 0 1 0 0 1 0 0 1 0 0 1 1 0 0 0 0 1 0 1  
18 0 1 0 0 0 0 1 2 0 2 0 0 0 0 0 1 0 1 1 1 0 0 0 0 1 0 4 1 0 0 2  
12 0 0 1 0 0 0 0 0 1 1 0 0 0 0 0 0 0 0 1 0 2 0 0 1 1 1 1 1 0 0  
14 3 0 0 0 0 0 0 0 1 0 0 0 0 0 1 0 0 2 0 2 1 0 0 1 0 1 0 1 0 0  
56 1 2 1 2 2 2 2 1 1 3 2 3 2 2 2 2 2 2 3 1 3 2 2 1 2 2 2 2 1  
14 0 0 0 0 1 0 0 0 0 1 0 0 0 0 0 1 1 0 0 0 1 1 1 0 2 0 2 2 0 1 0  
12 0 1 1 0 0 0 0 0 0 1 0 0 1 0 1 0 0 0 0 0 0 0 0 2 0 1 2 1 0 0  
10 0 0 0 1 1 0 1 0 0 0 0 0 0 0 1 1 0 0 1 1 1 0 0 0 1 0 0 0 1 0  
23 2 4 0 0 1 0 0 1 0 1 1 2 1 0 1 0 1 1 1 1 0 1 1 1 0 0 0 0 0 1  
14 0 0 1 0 0 0 0 1 0 1 1 0 1 0 0 1 0 1 1 0 1 1 0 1 1 0 0 0 1 0 0  
14 1 1 0 1 0 0 0 0 0 2 0 1 1 0 1 2 0 0 1 0 0 0 0 0 1 0 1 0 0 1  
10 2 0 1 0 1 0 0 0 0 0 0 0 0 0 1 0 0 1 0 0 0 0 1 0 1 0 0 0 0 1  
12 0 0 0 0 2 0 0 0 0 0 1 0 0 0 0 1 2 1 1 0 0 1 0 0 0 1 0 1 0 1 0  
34 1 4 1 0 1 1 1 0 0 1 0 0 2 1 0 1 2 3 1 1 0 2 1 1 2 3 1 1 2 0  
11 0 1 0 0 1 0 0 1 0 0 0 0 0 1 1 0 0 0 1 0 1 0 1 1 0 0 1 0 0 1 0

|                     |    |   |   |   |   |   |   |   |   |   |   |   |   |   |   |   |   |   |   |   |   |   |   |   |   |   |   |   |   |   |   |   |
|---------------------|----|---|---|---|---|---|---|---|---|---|---|---|---|---|---|---|---|---|---|---|---|---|---|---|---|---|---|---|---|---|---|---|
| rev_ENSP00000300027 | 17 | 0 | 0 | 1 | 0 | 1 | 0 | 2 | 0 | 0 | 0 | 0 | 0 | 0 | 0 | 0 | 0 | 0 | 1 | 1 | 1 | 1 | 2 | 0 | 1 | 3 | 0 | 1 | 0 | 1 | 1 |   |
| rev_ENSP00000300053 | 29 | 0 | 0 | 0 | 0 | 0 | 0 | 2 | 6 | 3 | 3 | 0 | 0 | 2 | 1 | 1 | 0 | 0 | 0 | 1 | 1 | 0 | 4 | 2 | 1 | 1 | 1 | 0 | 0 | 0 | 0 |   |
| rev_ENSP00000301030 | 13 | 0 | 0 | 0 | 2 | 0 | 1 | 0 | 0 | 0 | 1 | 2 | 0 | 0 | 0 | 0 | 1 | 0 | 0 | 0 | 1 | 1 | 0 | 0 | 0 | 0 | 0 | 2 | 0 | 2 |   |   |
| rev_ENSP00000301607 | 11 | 0 | 0 | 0 | 0 | 0 | 0 | 0 | 0 | 0 | 0 | 0 | 1 | 1 | 1 | 0 | 0 | 0 | 0 | 0 | 1 | 1 | 0 | 1 | 0 | 0 | 1 | 0 | 2 | 1 | 0 | 1 |
| rev_ENSP00000301740 | 11 | 0 | 0 | 1 | 0 | 0 | 0 | 0 | 0 | 0 | 0 | 1 | 0 | 0 | 0 | 0 | 0 | 0 | 1 | 1 | 2 | 1 | 0 | 0 | 0 | 2 | 0 | 0 | 1 | 1 | 0 |   |
| rev_ENSP00000301885 | 29 | 3 | 0 | 1 | 0 | 3 | 2 | 0 | 1 | 2 | 0 | 0 | 0 | 0 | 1 | 1 | 0 | 1 | 2 | 1 | 2 | 1 | 0 | 2 | 1 | 1 | 1 | 0 | 1 | 2 | 0 |   |
| rev_ENSP00000302028 | 11 | 0 | 1 | 2 | 0 | 0 | 0 | 0 | 1 | 3 | 0 | 0 | 0 | 0 | 1 | 0 | 0 | 0 | 0 | 0 | 0 | 0 | 0 | 0 | 0 | 1 | 0 | 0 | 1 | 0 | 1 |   |
| rev_ENSP00000303058 | 27 | 1 | 1 | 1 | 0 | 1 | 1 | 1 | 2 | 0 | 0 | 0 | 1 | 1 | 1 | 2 | 1 | 1 | 2 | 1 | 2 | 1 | 0 | 0 | 2 | 1 | 1 | 1 | 0 | 0 | 0 |   |
| rev_ENSP00000303585 | 18 | 1 | 0 | 0 | 0 | 0 | 0 | 1 | 2 | 0 | 0 | 0 | 1 | 1 | 0 | 1 | 0 | 1 | 1 | 1 | 1 | 0 | 0 | 1 | 0 | 1 | 1 | 0 | 1 | 2 | 0 |   |
| rev_ENSP00000304350 | 13 | 0 | 1 | 0 | 1 | 1 | 1 | 0 | 1 | 0 | 0 | 1 | 1 | 1 | 0 | 0 | 1 | 1 | 0 | 0 | 0 | 0 | 0 | 0 | 2 | 0 | 0 | 1 | 0 | 0 | 0 |   |
| rev_ENSP00000304604 | 10 | 0 | 0 | 0 | 0 | 0 | 1 | 0 | 0 | 0 | 1 | 1 | 0 | 0 | 0 | 0 | 0 | 0 | 2 | 0 | 0 | 0 | 0 | 0 | 0 | 0 | 1 | 2 | 0 | 0 | 1 | 1 |
| rev_ENSP00000304669 | 16 | 0 | 0 | 0 | 0 | 0 | 1 | 1 | 0 | 0 | 3 | 0 | 0 | 0 | 1 | 0 | 2 | 0 | 0 | 0 | 1 | 1 | 0 | 0 | 0 | 2 | 0 | 1 | 0 | 1 | 2 |   |
| rev_ENSP00000305075 | 16 | 0 | 0 | 1 | 1 | 0 | 3 | 0 | 0 | 0 | 0 | 0 | 0 | 0 | 1 | 2 | 0 | 0 | 2 | 0 | 0 | 0 | 0 | 1 | 0 | 2 | 0 | 0 | 1 | 0 | 2 |   |
| rev_ENSP00000305533 | 14 | 3 | 0 | 0 | 0 | 0 | 0 | 0 | 0 | 0 | 0 | 0 | 1 | 0 | 0 | 1 | 1 | 1 | 2 | 0 | 0 | 1 | 0 | 0 | 1 | 0 | 0 | 2 | 0 | 1 | 0 |   |
| rev_ENSP00000305795 | 11 | 1 | 0 | 0 | 0 | 0 | 1 | 0 | 0 | 0 | 0 | 0 | 0 | 0 | 0 | 0 | 1 | 1 | 0 | 0 | 1 | 0 | 2 | 1 | 0 | 2 | 0 | 1 | 0 | 0 | 0 |   |
| rev_ENSP00000305899 | 19 | 1 | 1 | 0 | 2 | 1 | 0 | 0 | 0 | 0 | 1 | 3 | 0 | 0 | 0 | 0 | 0 | 1 | 1 | 0 | 1 | 1 | 0 | 1 | 1 | 0 | 0 | 1 | 2 | 0 | 2 |   |
| rev_ENSP00000306473 | 13 | 1 | 0 | 0 | 0 | 0 | 0 | 1 | 0 | 0 | 0 | 0 | 2 | 0 | 2 | 0 | 1 | 1 | 2 | 0 | 0 | 1 | 0 | 1 | 0 | 0 | 0 | 0 | 0 | 1 | 0 |   |
| rev_ENSP00000306816 | 10 | 0 | 0 | 1 | 1 | 0 | 0 | 1 | 0 | 0 | 0 | 0 | 1 | 0 | 1 | 2 | 0 | 0 | 0 | 0 | 1 | 1 | 0 | 0 | 0 | 0 | 0 | 0 | 0 | 1 | 0 |   |
| rev_ENSP00000306940 | 30 | 1 | 1 | 1 | 0 | 1 | 1 | 1 | 1 | 2 | 0 | 0 | 0 | 2 | 1 | 1 | 2 | 1 | 1 | 2 | 1 | 2 | 1 | 0 | 0 | 1 | 1 | 1 | 2 | 2 | 0 |   |
| rev_ENSP00000307208 | 16 | 0 | 1 | 0 | 0 | 1 | 1 | 0 | 0 | 1 | 1 | 2 | 0 | 0 | 0 | 0 | 2 | 0 | 0 | 0 | 1 | 0 | 1 | 1 | 2 | 0 | 0 | 0 | 1 | 1 | 0 | 1 |
| rev_ENSP00000307567 | 57 | 3 | 2 | 1 | 3 | 3 | 4 | 0 | 2 | 0 | 3 | 1 | 1 | 1 | 2 | 5 | 1 | 2 | 1 | 1 | 3 | 1 | 3 | 2 | 0 | 2 | 2 | 3 | 1 | 2 | 2 |   |
| rev_ENSP00000307939 | 30 | 1 | 0 | 1 | 1 | 0 | 2 | 1 | 0 | 0 | 1 | 0 | 2 | 0 | 0 | 2 | 1 | 1 | 2 | 1 | 1 | 2 | 2 | 0 | 1 | 1 | 0 | 1 | 2 | 1 | 3 |   |
| rev_ENSP00000307940 | 27 | 2 | 0 | 1 | 0 | 1 | 0 | 0 | 0 | 0 | 2 | 0 | 1 | 1 | 0 | 2 | 1 | 1 | 1 | 1 | 1 | 1 | 1 | 0 | 1 | 0 | 2 | 1 | 3 | 2 | 1 |   |
| rev_ENSP00000308021 | 26 | 0 | 0 | 1 | 1 | 1 | 0 | 2 | 1 | 0 | 0 | 0 | 1 | 2 | 0 | 3 | 2 | 0 | 0 | 1 | 0 | 0 | 0 | 0 | 0 | 1 | 3 | 3 | 3 | 0 | 0 |   |
| rev_ENSP00000308208 | 10 | 0 | 0 | 0 | 0 | 0 | 0 | 0 | 0 | 1 | 1 | 0 | 0 | 0 | 1 | 0 | 0 | 1 | 0 | 0 | 0 | 0 | 2 | 1 | 1 | 0 | 0 | 0 | 1 | 0 | 1 |   |
| rev_ENSP00000310055 | 33 | 1 | 1 | 1 | 1 | 2 | 2 | 2 | 2 | 0 | 2 | 0 | 0 | 2 | 0 | 2 | 1 | 1 | 2 | 1 | 1 | 2 | 1 | 1 | 2 | 1 | 0 | 1 | 1 | 1 | 0 |   |
| rev_ENSP00000310227 | 10 | 0 | 0 | 0 | 0 | 1 | 0 | 0 | 0 | 0 | 0 | 0 | 1 | 2 | 0 | 0 | 0 | 0 | 0 | 1 | 0 | 0 | 0 | 0 | 0 | 2 | 0 | 1 | 0 | 0 | 2 |   |
| rev_ENSP00000311232 | 14 | 1 | 0 | 1 | 0 | 0 | 1 | 0 | 1 | 3 | 2 | 0 | 0 | 1 | 0 | 0 | 0 | 1 | 0 | 0 | 0 | 0 | 0 | 0 | 0 | 0 | 1 | 0 | 1 | 0 | 1 |   |
| rev_ENSP00000311489 | 11 | 0 | 0 | 1 | 1 | 0 | 0 | 1 | 0 | 1 | 0 | 0 | 1 | 0 | 0 | 0 | 0 | 0 | 0 | 1 | 0 | 1 | 1 | 0 | 1 | 0 | 1 | 1 | 0 | 0 | 0 |   |
| rev_ENSP00000313420 | 26 | 2 | 0 | 1 | 2 | 1 | 2 | 0 | 0 | 1 | 2 | 0 | 0 | 0 | 0 | 1 | 0 | 0 | 2 | 1 | 1 | 2 | 3 | 0 | 1 | 2 | 0 | 0 | 0 | 2 | 0 |   |
| rev_ENSP00000313851 | 21 | 0 | 1 | 1 | 0 | 0 | 1 | 2 | 1 | 2 | 0 | 1 | 2 | 0 | 0 | 1 | 0 | 0 | 0 | 0 | 0 | 0 | 1 | 2 | 0 | 0 | 0 | 1 | 1 | 1 | 3 |   |
| rev_ENSP00000314556 | 21 | 2 | 1 | 1 | 1 | 1 | 0 | 1 | 1 | 0 | 0 | 0 | 0 | 0 | 2 | 0 | 1 | 0 | 1 | 0 | 1 | 1 | 0 | 0 | 1 | 1 | 1 | 1 | 1 | 1 | 1 |   |
| rev_ENSP00000316029 | 38 | 2 | 0 | 2 | 0 | 0 | 3 | 0 | 0 | 1 | 2 | 0 | 0 | 1 | 0 | 1 | 2 | 3 | 2 | 0 | 0 | 2 | 2 | 0 | 2 | 5 | 2 | 3 | 2 | 1 | 0 |   |
| rev_ENSP00000316042 | 10 | 2 | 0 | 0 | 0 | 0 | 1 | 0 | 0 | 0 | 0 | 0 | 0 | 0 | 1 | 0 | 4 | 0 | 0 | 1 | 1 | 0 | 0 | 0 | 0 | 0 | 0 | 0 | 0 | 0 | 0 |   |
| rev_ENSP00000316357 | 10 | 1 | 0 | 0 | 1 | 0 | 0 | 0 | 0 | 1 | 0 | 0 | 0 | 2 | 0 | 0 | 0 | 0 | 2 | 0 | 0 | 1 | 0 | 0 | 0 | 0 | 0 | 0 | 1 | 1 | 0 |   |
| rev_ENSP00000316699 | 10 | 0 | 0 | 0 | 0 | 0 | 0 | 0 | 0 | 0 | 0 | 0 | 0 | 1 | 0 | 0 | 0 | 1 | 0 | 1 | 0 | 1 | 1 | 0 | 0 | 2 | 0 | 0 | 1 | 0 | 2 |   |
| rev_ENSP00000317123 | 10 | 1 | 0 | 0 | 0 | 0 | 0 | 0 | 0 | 0 | 0 | 0 | 0 | 0 | 0 | 0 | 0 | 0 | 0 | 0 | 0 | 1 | 1 | 2 | 0 | 0 | 0 | 1 | 0 | 4 |   |   |
| rev_ENSP00000317802 | 16 | 0 | 0 | 1 | 1 | 3 | 1 | 1 | 0 | 0 | 1 | 0 | 0 | 0 | 1 | 0 | 0 | 0 | 0 | 0 | 0 | 0 | 2 | 0 | 1 | 2 | 0 | 1 | 0 | 1 | 0 |   |
| rev_ENSP00000317851 | 23 | 0 | 1 | 0 | 3 | 1 | 0 | 1 | 0 | 0 | 1 | 2 | 1 | 1 | 1 | 0 | 0 | 0 | 1 | 0 | 0 | 0 | 3 | 1 | 2 | 1 | 1 | 0 | 0 | 0 | 2 |   |
| rev_ENSP00000318480 | 10 | 0 | 0 | 0 | 0 | 0 | 2 | 0 | 0 | 1 | 0 | 0 | 0 | 0 | 1 | 0 | 1 | 0 | 0 | 0 | 0 | 0 | 0 | 1 | 0 | 0 | 0 | 1 | 0 | 1 | 1 |   |
| rev_ENSP00000319104 | 13 | 0 | 1 | 0 | 1 | 0 | 2 | 1 | 0 | 0 | 1 | 0 | 0 | 0 | 0 | 0 | 0 | 0 | 1 | 2 | 0 | 1 | 0 | 1 | 0 | 0 | 1 | 0 | 0 | 0 | 1 |   |
| rev_ENSP00000319323 | 14 | 2 | 0 | 0 | 0 | 1 | 1 | 0 | 0 | 0 | 0 | 0 | 0 | 1 | 0 | 0 | 0 | 1 | 0 | 0 | 1 | 0 | 1 | 1 | 1 | 0 | 2 | 0 | 1 | 0 | 0 |   |
| rev_ENSP00000321347 | 12 | 1 | 1 | 1 | 0 | 0 | 0 | 0 | 0 | 0 | 0 | 0 | 0 | 1 | 1 | 0 | 0 | 1 | 1 | 0 | 0 | 0 | 1 | 0 | 1 | 1 | 0 | 0 | 0 | 0 | 1 |   |
| rev_ENSP00000322226 | 28 | 1 | 1 | 1 | 0 | 1 | 1 | 1 | 1 | 2 | 0 | 0 | 0 | 1 | 1 | 2 | 1 | 1 | 2 | 1 | 2 | 2 | 0 | 0 | 1 | 1 | 1 | 2 | 0 | 0 | 0 |   |
| rev_ENSP00000322249 | 20 | 1 | 1 | 1 | 0 | 0 | 1 | 1 | 2 | 1 | 0 | 0 | 1 | 0 | 0 | 1 | 0 | 0 | 1 | 2 | 0 | 2 | 2 | 0 | 0 | 0 | 1 | 1 | 0 | 1 | 0 |   |
| rev_ENSP00000322938 | 58 | 3 | 2 | 1 | 3 | 2 | 1 | 3 | 3 | 1 | 1 | 1 | 1 | 3 | 3 | 2 | 2 | 1 | 2 | 2 | 1 | 3 | 2 | 2 | 0 | 1 | 3 | 1 | 2 | 3 | 3 |   |
| rev_ENSP00000323421 | 14 | 1 | 1 | 0 | 0 | 0 | 0 | 0 | 1 | 1 | 1 | 0 | 1 | 1 | 0 | 0 | 0 | 0 | 0 | 1 | 0 | 0 | 0 | 3 | 0 | 0 | 0 | 1 | 0 | 1 | 0 |   |
| rev_ENSP00000323837 | 11 | 1 | 0 | 0 | 0 | 2 | 0 | 0 | 2 | 0 | 0 | 0 | 0 | 0 | 0 | 1 | 0 | 0 | 0 | 1 | 0 | 0 | 0 | 0 | 1 | 1 | 1 | 1 | 0 | 0 | 0 |   |
| rev_ENSP00000323856 | 19 | 1 | 2 | 0 | 1 | 0 | 0 | 1 | 1 | 0 | 1 | 0 | 1 | 0 | 0 | 2 | 0 | 1 | 1 | 0 | 0 | 1 | 0 | 0 | 0 | 0 | 1 | 2 | 1 | 2 | 1 |   |
| rev_ENSP00000325677 | 14 | 1 | 1 | 0 | 0 | 0 | 1 | 0 | 1 | 0 | 1 | 0 | 0 | 2 | 0 | 0 | 0 | 2 | 0 | 0 | 1 | 0 | 0 | 0 | 1 | 1 | 1 | 0 | 0 | 0 | 1 |   |
| rev_ENSP00000325863 | 16 | 0 | 0 | 0 | 1 | 0 | 0 | 2 | 2 | 0 | 0 | 0 | 0 | 2 | 0 | 0 | 0 | 1 | 0 | 0 | 1 | 1 | 0 | 0 | 0 | 0 | 1 | 1 | 2 | 2 | 0 |   |
| rev_ENSP00000326514 | 17 | 0 | 0 | 0 | 0 | 2 | 1 | 1 | 0 | 0 | 0 | 0 | 1 | 2 | 1 | 0 | 0 | 1 | 1 | 0 | 0 | 1 | 0 | 2 | 0 | 0 | 1 | 2 | 0 | 0 | 0 |   |
| rev_ENSP00000327104 | 50 | 1 | 3 | 1 | 1 | 3 | 1 | 1 | 3 | 1 | 0 | 0 | 0 | 1 | 1 | 1 | 2 | 0 | 1 | 2 | 2 | 2 | 1 | 2 | 3 | 3 | 3 | 3 | 4 | 1 | 3 |   |
| rev_ENSP00000327436 | 33 | 0 | 0 | 0 | 1 | 0 | 8 | 1 | 1 | 0 | 0 | 0 | 2 | 0 | 0 | 1 | 0 | 1 | 3 | 0 | 0 | 0 | 1 | 0 | 4 | 1 | 1 | 2 | 0 | 0 | 6 |   |
| rev_ENSP00000327880 | 12 | 0 | 1 | 1 | 1 | 0 | 0 | 0 | 0 | 1 | 0 | 0 | 1 | 1 | 0 | 1 | 0 | 0 | 0 | 0 | 0 | 0 | 1 | 1 | 0 | 0 | 0 | 0 | 0 | 1 | 1 |   |
| rev_ENSP00000328023 | 42 | 2 | 0 | 0 | 0 | 3 | 3 | 2 | 2 | 2 | 1 | 0 | 1 | 2 | 0 | 2 | 0 | 1 | 2 | 1 | 1 | 3 | 2 | 1 | 5 | 0 | 2 | 3 | 0 | 0 | 1 | 0 |
| rev_ENSP00000328103 | 63 | 3 | 3 | 2 | 3 | 3 | 1 | 3 | 4 | 3 | 1 | 1 | 1 | 4 | 0 | 0 | 4 | 2 | 1 | 2 | 3 | 1 | 3 | 3 | 4 | 2 | 2 | 1 | 1 | 0 | 2 |   |
| rev_ENSP00000328690 | 11 | 1 | 0 | 0 | 0 | 1 | 1 | 0 | 0 | 0 | 1 | 0 | 0 | 1 | 0 | 1 | 0 | 0 | 0 | 1 | 2 | 0 | 0 | 0 | 0 | 0 | 0 | 0 | 1 | 0 | 0 |   |
| rev_ENSP00000328722 | 18 | 0 | 1 | 1 | 0 | 1 | 1 | 0 | 1 | 0 | 1 | 1 | 1 | 0 | 0 | 0 | 1 | 1 | 0 | 0 | 1 | 1 | 0 | 0 |   |   |   |   |   |   |   |   |

|    |   |   |   |   |   |   |   |   |   |   |   |   |   |   |   |   |   |   |   |   |   |   |   |   |   |   |   |   |   |   |   |
|----|---|---|---|---|---|---|---|---|---|---|---|---|---|---|---|---|---|---|---|---|---|---|---|---|---|---|---|---|---|---|---|
| 15 | 4 | 3 | 1 | 0 | 1 | 1 | 0 | 0 | 0 | 0 | 0 | 1 | 0 | 0 | 1 | 0 | 0 | 0 | 1 | 0 | 0 | 0 | 0 | 1 | 0 | 0 | 1 | 0 | 0 | 1 |   |
| 12 | 0 | 1 | 1 | 0 | 1 | 0 | 0 | 0 | 1 | 2 | 0 | 0 | 0 | 1 | 1 | 0 | 1 | 0 | 0 | 1 | 0 | 0 | 1 | 0 | 0 | 0 | 0 | 0 | 0 | 0 |   |
| 11 | 1 | 1 | 0 | 2 | 0 | 0 | 1 | 0 | 0 | 0 | 0 | 0 | 0 | 0 | 0 | 2 | 0 | 0 | 1 | 0 | 0 | 0 | 0 | 1 | 1 | 0 | 0 | 1 | 1 | 0 |   |
| 10 | 0 | 0 | 0 | 0 | 0 | 0 | 0 | 0 | 0 | 0 | 0 | 0 | 0 | 0 | 0 | 0 | 1 | 1 | 0 | 1 | 2 | 0 | 1 | 1 | 0 | 0 | 1 | 0 | 0 | 0 |   |
| 21 | 0 | 0 | 2 | 0 | 0 | 2 | 2 | 3 | 1 | 0 | 0 | 0 | 0 | 0 | 0 | 0 | 0 | 0 | 1 | 2 | 1 | 2 | 0 | 1 | 0 | 1 | 0 | 2 | 0 | 1 |   |
| 11 | 1 | 0 | 0 | 0 | 0 | 0 | 0 | 0 | 0 | 0 | 0 | 1 | 0 | 0 | 1 | 0 | 0 | 1 | 0 | 0 | 0 | 0 | 0 | 2 | 1 | 0 | 1 | 0 | 1 | 2 | 0 |
| 12 | 3 | 0 | 0 | 0 | 1 | 1 | 1 | 0 | 0 | 0 | 1 | 0 | 0 | 1 | 0 | 0 | 0 | 0 | 0 | 0 | 0 | 0 | 1 | 0 | 1 | 2 | 0 | 0 | 0 | 0 | 0 |
| 18 | 2 | 0 | 0 | 0 | 1 | 2 | 0 | 2 | 1 | 0 | 0 | 0 | 1 | 0 | 0 | 0 | 0 | 0 | 0 | 1 | 0 | 0 | 2 | 2 | 1 | 1 | 0 | 0 | 2 | 0 | 0 |
| 21 | 4 | 2 | 1 | 0 | 1 | 0 | 0 | 0 | 0 | 0 | 1 | 2 | 0 | 0 | 0 | 0 | 1 | 0 | 0 | 1 | 0 | 0 | 0 | 2 | 3 | 1 | 1 | 1 | 1 | 1 | 0 |
| 12 | 1 | 0 | 1 | 0 | 0 | 0 | 1 | 0 | 0 | 0 | 1 | 0 | 0 | 1 | 0 | 0 | 1 | 0 | 0 | 0 | 2 | 0 | 0 | 1 | 0 | 1 | 0 | 1 | 0 | 0 | 0 |
| 10 | 0 | 1 | 0 | 0 | 0 | 0 | 0 | 0 | 0 | 0 | 1 | 0 | 0 | 0 | 0 | 0 | 0 | 0 | 0 | 0 | 0 | 3 | 0 | 0 | 0 | 0 | 1 | 2 | 0 | 1 | 0 |
| 22 | 2 | 0 | 2 | 0 | 1 | 0 | 1 | 2 | 1 | 0 | 0 | 0 | 1 | 1 | 2 | 0 | 1 | 1 | 0 | 1 | 2 | 1 | 0 | 2 | 0 | 1 | 0 | 0 | 0 | 0 | 0 |
| 24 | 0 | 0 | 0 | 1 | 0 | 0 | 0 | 0 | 1 | 1 | 0 | 1 | 1 | 2 | 0 | 1 | 0 | 1 | 4 | 1 | 2 | 1 | 0 | 0 | 2 | 1 | 0 | 2 | 1 | 1 | 1 |
| 17 | 0 | 0 | 0 | 0 | 0 | 0 | 0 | 1 | 1 | 0 | 0 | 1 | 0 | 0 | 1 | 1 | 1 | 1 | 0 | 0 | 0 | 2 | 0 | 0 | 2 | 0 | 0 | 0 | 0 | 0 | 0 |
| 27 | 0 | 1 | 0 | 0 | 3 | 0 | 0 | 0 | 1 | 1 | 1 | 2 | 1 | 0 | 0 | 1 | 1 | 2 | 0 | 3 | 1 | 0 | 1 | 1 | 1 | 2 | 0 | 1 | 1 | 2 | 0 |
| 13 | 0 | 1 | 0 | 0 | 0 | 0 | 0 | 0 | 0 | 0 | 0 | 1 | 0 | 0 | 1 | 0 | 0 | 1 | 0 | 0 | 3 | 0 | 0 | 1 | 0 | 1 | 0 | 0 | 1 | 1 | 2 |
| 13 | 1 | 0 | 1 | 2 | 0 | 0 | 0 | 0 | 0 | 0 | 0 | 0 | 0 | 1 | 0 | 0 | 0 | 1 | 1 | 0 | 2 | 0 | 0 | 0 | 1 | 0 | 1 | 0 | 1 | 1 | 0 |
| 10 | 0 | 0 | 0 | 0 | 1 | 0 | 0 | 0 | 1 | 0 | 0 | 0 | 0 | 1 | 0 | 0 | 0 | 1 | 1 | 0 | 1 | 1 | 0 | 1 | 1 | 0 | 1 | 0 | 0 | 0 | 0 |
| 12 | 0 | 0 | 0 | 1 | 0 | 0 | 0 | 0 | 1 | 0 | 0 | 0 | 0 | 0 | 0 | 0 | 1 | 3 | 1 | 0 | 0 | 1 | 0 | 1 | 0 | 1 | 0 | 1 | 0 | 2 | 0 |
| 12 | 1 | 0 | 0 | 0 | 0 | 0 | 0 | 0 | 0 | 0 | 0 | 0 | 0 | 0 | 1 | 0 | 0 | 0 | 1 | 0 | 0 | 1 | 0 | 1 | 2 | 2 | 1 | 0 | 0 | 0 | 0 |
| 10 | 1 | 0 | 0 | 0 | 0 | 1 | 0 | 0 | 0 | 0 | 0 | 0 | 1 | 0 | 0 | 1 | 0 | 0 | 0 | 0 | 1 | 0 | 1 | 0 | 1 | 0 | 1 | 0 | 2 |   |   |
