# Supplementary material
Source: PubMed Central journal article supplement (PMC3896054)
Supplement: NIHMS543571-supplement-5.pdf [file NIHMS543571-supplement-5.pdf]

MMR-VERSUS-MMR:

Table with columns: Proteins, ENSG, HNCRC, Protein/GO Cluster, count1, count2, rate1, rate2, X2log-ratio, qvalue, pvalue, TotalCounts, and a grid of 20x20 counts. The table lists various proteins and their associated counts across different categories.





















|                                 |                 |          |      |      |     |            |            |             |            |            |            |            |     |    |    |    |    |    |    |    |    |    |    |    |    |    |    |    |    |    |    |    |    |    |    |    |    |    |    |    |    |   |    |
|---------------------------------|-----------------|----------|------|------|-----|------------|------------|-------------|------------|------------|------------|------------|-----|----|----|----|----|----|----|----|----|----|----|----|----|----|----|----|----|----|----|----|----|----|----|----|----|----|----|----|----|---|----|
| ENSP0000366124,ENSP000001       | ENSG0000010139  | CST3     | 1953 | 1    | 38  | 22         | 0.00013737 | 4.81E-05    | 1.5541849  | 7.12E-05   | 0.00773125 | 60         | 4   | 3  | 3  | 5  | 7  | 3  | 0  | 2  | 2  | 2  | 2  | 2  | 2  | 2  | 1  | 0  | 0  | 1  | 2  | 1  | 1  | 1  | 3  | 2  | 3  | 1  | 2  | 1  | 0  | 1 |    |
| ENSP0000217426,K33AC            | ENSG0000010144  | ANCY     | 1998 | 1    | 381 | 251        | 0.00054432 | 0.00054432  | 0.00054432 | 0.00054432 | 0.00054432 | 0.00054432 | 412 | 27 | 15 | 36 | 7  | 14 | 17 | 17 | 3  | 11 | 18 | 5  | 6  | 12 | 5  | 12 | 19 | 20 | 26 | 9  | 12 | 14 | 10 | 8  | 7  | 29 | 19 | 16 | 16 | 9 | 13 |
| ENSP0000361705,ENSP000001       | ENSG0000010145  | NTTP1    | 5861 | 1255 | 57  | 4          | 2.57E-05   | 7.4         | 0.00000000 | 0.00000000 | 0.00000000 | 0.00000000 | 11  | 0  | 0  | 1  | 1  | 1  | 0  | 1  | 0  | 0  | 0  | 0  | 1  | 1  | 0  | 1  | 0  | 2  | 1  | 0  | 0  | 0  | 0  | 0  | 0  | 0  | 0  | 0  | 0  |   |    |
| ENSP00002021473,ENSP000001      | ENSG0000010147  | ACOT8    | 1763 | 421  | 6   | 4          | 2.17E-05   | 8.74E-06    | 1.31128509 | 0.18425786 | 0.52542312 | 11         | 0   | 0  | 2  | 1  | 1  | 0  | 0  | 0  | 0  | 0  | 0  | 0  | 1  | 0  | 0  | 1  | 0  | 0  | 0  | 0  | 0  | 0  | 0  | 0  | 0  | 0  | 0  | 0  | 0  | 0 |    |
| ENSP0000217456,ENSP000001       | ENSG00000101474 | C20orf3  | 1733 | 3    | 115 | 80002      | 0.00002182 | 0.00276004  | 0.20276004 | 0.24351802 | 0.59095874 | 115        | 1   | 5  | 8  | 5  | 6  | 5  | 6  | 4  | 7  | 13 | 4  | 4  | 9  | 6  | 9  | 7  | 5  | 7  | 7  | 6  | 7  | 5  | 4  | 5  | 7  | 11 | 4  | 5  |    |   |    |
| ENSP0000305956,ENSP000001       | ENSG0000010156  | C16orf22 | 1153 | 1152 | 7   | 9          | 7.23E-06   | 1.97E-05    | -1.4446004 | 0.16514135 | 0.59563116 | 115        | 1   | 0  | 1  | 0  | 0  | 0  | 0  | 0  | 0  | 0  | 0  | 0  | 0  | 0  | 1  | 0  | 0  | 0  | 0  | 0  | 0  | 0  | 0  | 0  | 0  | 0  | 0  | 0  | 0  | 0 |    |
| ENSP0000361611,ENSP000001       | ENSG0000010157  | USP18    | 9046 | 1    | 36  | 0.00042222 | 0.00042222 | 0.00042222  | 0.00042222 | 0.00042222 | 0.00042222 | 424        | 21  | 10 | 14 | 5  | 6  | 15 | 8  | 15 | 11 | 3  | 6  | 4  | 7  | 13 | 20 | 9  | 11 | 11 | 17 | 19 | 21 | 18 | 14 | 14 | 22 | 17 | 26 | 15 | 22 |   |    |
| ENSP0000345656,Z162S,ENSP000001 | ENSG0000010158  | VAPA     | 3674 | 1    | 118 | 0.00037596 | 0.00034961 | 0.10483422  | 0.58843736 | 0.82776365 | 264        | 8          | 9   | 10 | 7  | 7  | 10 | 8  | 7  | 5  | 6  | 7  | 5  | 6  | 9  | 8  | 14 | 12 | 9  | 6  | 14 | 12 | 6  | 8  | 5  | 9  | 5  | 5  | 5  | 5  |    |   |    |
| ENSP0000217602,ENSP000001       | ENSG00000101558 | VAPA     | 3673 | 1    | 104 | 215        | 0.0005972  | 0.01718019  | 0.50067611 | 0.78453099 | 356        | 14         | 12  | 11 | 8  | 8  | 25 | 10 | 11 | 11 | 7  | 7  | 6  | 9  | 10 | 10 | 20 | 9  | 15 | 11 | 9  | 18 | 13 | 17 | 12 | 13 | 8  | 13 | 9  | 5  |    |   |    |
| ENSP0000262598,ENSP000001       | ENSG00000101596 | SMCHD1   | 1095 | 1    | 34  | 78         | 0.0012291  | 0.00121405  | -0.4716188 | 0.46514283 | 0.30928256 | 112        | 5   | 2  | 3  | 1  | 3  | 4  | 5  | 2  | 4  | 4  | 3  | 4  | 7  | 3  | 5  | 3  | 6  | 9  | 3  | 6  | 4  | 3  | 6  | 3  | 2  | 3  | 5  | 3  |    |   |    |
| ENSP000030262173,ENSP000001     | ENSG0000010162  | USP18    | 9046 | 1    | 105 | 0.00021555 | 0.00021555 | 0.00021555  | 0.00021555 | 0.00021555 | 105        | 0          | 0   | 0  | 0  | 0  | 0  | 0  | 0  | 0  | 0  | 0  | 0  | 0  | 0  | 0  | 0  | 0  | 0  | 0  | 0  | 0  | 0  | 0  | 0  | 0  | 0  | 0  | 0  | 0  |    |   |    |
| ENSP00003041874,ENSP000001      | ENSG00000101874 | RIOK3    | 4078 | 1079 | 2   | 10         | 7.23E-06   | 1.97E-05    | -1.5956505 | 0.09628874 | 0.38774405 | 12         | 1   | 0  | 0  | 0  | 0  | 0  | 0  | 0  | 0  | 0  | 0  | 0  | 0  | 0  | 0  | 2  | 1  | 0  | 2  | 0  | 0  | 0  | 0  | 0  | 0  | 0  | 0  | 0  | 0  |   |    |
| ENSP0000306203,ENSP000001       | ENSG0000010181  | CSTF2    | 3737 | 1    | 51  | 80         | 0.0004437  | 0.000478184 | 0.70878184 | 0.7087374  | 0.88361426 | 131        | 5   | 4  | 2  | 4  | 5  | 3  | 4  | 7  | 7  | 5  | 4  | 3  | 4  | 6  | 4  | 4  | 5  | 4  | 5  | 2  | 4  | 5  | 2  | 4  | 6  | 3  | 2  | 4  | 2  |   |    |
| ENSP0000217598,ENSP000001       | ENSG00000101843 | PSMD10   | 1070 | 1240 | 13  | 20         | 4.70E-05   | 4.37E-05    | 0.10483422 | 0.84949081 | 0.59414235 | 33         | 0   | 4  | 3  | 0  | 2  | 1  | 1  | 0  | 1  | 0  | 0  | 1  | 1  | 0  | 2  | 0  | 2  | 0  | 0  | 0  | 0  | 0  | 0  | 0  | 0  | 0  | 0  | 0  | 0  |   |    |
| ENSP0000217961,ENSP000001       | ENSG00000101849 | TBL1X    | 2198 | 1    | 8   | 8.74E-05   | 0.00000000 | 0.00000000  | 0.00000000 | 0.00000000 | 0.00000000 | 17         | 0   | 0  | 0  | 0  | 0  | 0  | 0  | 0  | 0  | 0  | 0  | 0  | 0  | 0  | 0  | 0  | 0  | 0  | 0  | 0  | 0  | 0  | 0  | 0  | 0  | 0  | 0  | 0  |    |   |    |
| ENSP0000217964,ENSP000001       | ENSG00000101849 | TBL1X    | 1999 | 478  | 13  | 25         | 4.70E-05   | 5.46E-05    | -0.217999  | 0.57484818 | 0.82077282 | 38         | 2   | 1  | 0  | 0  | 0  | 0  | 0  | 2  | 3  | 1  | 0  | 1  | 0  | 1  | 0  | 2  | 1  | 0  | 1  | 3  | 1  | 1  | 2  | 1  | 2  | 1  | 4  | 2  |    |   |    |
| ENSP000020217971,ENSP000001     | ENSG00000101856 | PGRMC1   | 2114 | 1    | 84  | 102        | 0.0003366  | 0.0002288   | 0.44621366 | 0.0157807  | 0.15889693 | 186        | 5   | 9  | 5  | 9  | 8  | 6  | 9  | 8  | 2  | 8  | 1  | 3  | 7  | 4  | 6  | 4  | 4  | 4  | 4  | 9  | 4  | 9  | 11 | 5  | 9  | 6  | 8  | 4  |    |   |    |
| ENSP0000308349,ENSP000001       | ENSG00000101868 | POLA1    | 5379 | 1    | 40  | 49         | 0.003446   | 0.003446    | 0.4334084  | 0.2274447  | 0.56448986 | 95         | 2   | 1  | 9  | 4  | 4  | 1  | 2  | 4  | 4  | 3  | 2  | 4  | 4  | 5  | 4  | 6  | 3  | 3  | 1  | 3  | 1  | 3  | 2  | 2  | 1  | 1  | 4  | 1  |    |   |    |
| ENSP0000306364,ENSP000001       | ENSG00000101862 | NBS4     | 5693 | 1    | 8   | 4          | 2.89E-05   | 1.53E-05    | 0.19186707 | 0.3181545  | 0.65958494 | 178        | 0   | 0  | 0  | 0  | 0  | 0  | 0  | 0  | 0  | 0  | 0  | 0  | 0  | 0  | 0  | 0  | 0  | 0  | 0  | 0  | 0  | 0  | 0  | 0  | 0  | 0  | 0  | 0  | 0  |   |    |
| ENSP0000306367,ENSP000001       | ENSG00000101888 | MCT51    | 6235 | 689  | 27  | 8          | 3.96E-05   | 8.07E-05    | 0.2328258  | 0.60626263 | 0.8864040  | 69         | 1   | 4  | 0  | 0  | 0  | 1  | 0  | 2  | 0  | 2  | 0  | 1  | 2  | 1  | 2  | 1  | 1  | 1  | 3  | 5  | 0  | 2  | 6  | 2  | 4  | 2  | 1  | 4  |    |   |    |
| ENSP0000307043,ENSP000001       | ENSG00000101911 | PPS2     | 2446 | 1    | 32  | 98         | 0.00011568 | 0.00021414  | -0.8883873 | 0.01501501 | 0.15739161 | 130        | 7   | 5  | 2  | 0  | 6  | 4  | 1  | 0  | 2  | 3  | 1  | 2  | 0  | 4  | 8  | 6  | 7  | 4  | 8  | 4  | 0  | 0  | 0  | 0  | 0  | 0  | 0  | 0  |    |   |    |
| ENSP0000218808,ENSP000001       | ENSG00000101951 | PAG4     | 2512 | 583  | 13  | 0          | 4.70E-05   | 1.65E-11    | 28.8854034 | 0.0001879  | 0.01249219 | 13         | 0   | 0  | 0  | 0  | 0  | 0  | 0  | 0  | 0  | 0  | 0  | 0  | 0  | 0  | 0  | 0  | 0  | 0  | 0  | 0  | 0  | 0  | 0  | 0  | 0  | 0  | 0  | 0  |    |   |    |
| ENSP0000347858,ENSP000001       | ENSG00000101966 | STG2     | 4920 | 95   | 42  | 9          | 1.32E-05   | 4.15E-05    | -0.3516799 | 0.6832841  | 0.82666651 | 17         | 0   | 0  | 0  | 0  | 0  | 0  | 0  | 0  | 0  | 0  | 0  | 0  | 0  | 0  | 0  | 0  | 0  | 0  | 0  | 0  | 0  | 0  | 0  | 0  | 0  | 0  | 0  | 0  |    |   |    |
| ENSP0000218089,ENSP000001       | ENSG00000101972 | STAG2    | 4946 | 1    | 54  | 75         | 0.0019521  | 0.0001688   | 0.2529194  | 0.33881153 | 0.6676249  | 129        | 7   | 1  | 6  | 4  | 3  | 7  | 6  | 4  | 9  | 2  | 4  | 3  | 1  | 4  | 5  | 4  | 3  | 8  | 5  | 6  | 9  | 1  | 3  | 3  | 7  | 3  | 6  |    |    |   |    |
| ENSP0000332756,ENSP000001       | ENSG00000101974 | ATP11C   | 5883 | 1    | 3   | 8          | 1.08E-05   | 1.75E-05    | -0.6887149 | 0.46592731 | 0.79599516 | 11         | 0   | 0  | 0  | 0  | 0  | 0  | 0  | 0  | 0  | 0  | 0  | 0  | 0  | 0  | 0  | 1  | 1  | 2  | 0  | 0  | 0  | 0  | 0  | 0  | 0  | 0  | 0  | 0  |    |   |    |
| ENSP0000339588,ENSP000001       | ENSG00000101974 | ATP11C   | 4888 | 1    | 3   | 8          | 1.08E-05   | 1.75E-05    | -0.6887149 | 0.46592731 | 0.79599516 | 11         | 0   | 0  | 0  | 0  | 0  | 0  | 0  | 0  | 0  | 0  | 0  | 0  | 0  | 0  | 0  | 0  | 1  | 1  | 2  | 0  | 0  | 0  | 0  | 0  | 0  | 0  | 0  | 0  |    |   |    |
| ENSP0000218104,ENSP000001       | ENSG00000101976 | PCNA     | 2572 | 602  | 26  | 14         | 0.0001482  | 0.0001482   | 0.0001482  | 0.0001482  | 0.0001482  | 11         | 0   | 0  | 0  | 0  | 0  | 0  | 0  | 0  | 0  | 0  | 0  | 0  | 0  | 0  | 0  | 0  | 0  | 0  | 0  | 0  | 0  | 0  | 0  | 0  | 0  | 0  | 0  | 0  |    |   |    |
| ENSP0000365401,ENSP000001       | ENSG00000101997 | CCDC22   | 4883 | 1    | 23  | 54         | 8.31E-05   | 0.00011799  | -0.505003  | 0.31566644 | 0.64792497 | 77         | 7   | 1  | 2  | 3  | 0  | 2  | 1  | 2  | 0  | 0  | 0  | 0  | 0  | 0  | 0  | 2  | 1  | 3  | 5  | 1  | 2  | 3  | 0  | 13 | 5  | 3  | 4  | 0  |    |   |    |
| ENSP0000308550,ENSP000001       | ENSG00000102007 | PUP2     | 1478 | 1184 | 25  | 41         | 9.04E-05   | 8.86E-05    | 0.01262678 | 0.97522262 | 0.9910128  | 66         | 2   | 2  | 1  | 2  | 3  | 1  | 2  | 1  | 0  | 0  | 0  | 0  | 0  | 0  | 0  | 0  | 0  | 0  | 0  | 0  | 0  | 0  | 0  | 0  | 0  | 0  | 0  | 0  |    |   |    |
| ENSP0000308596,ENSP000001       | ENSG00000102004 | PLS3     | 4575 | 1    | 214 | 299        | 0.00077861 | 0.0005333   | 0.24378791 | 0.35807957 | 0.68122136 | 513        | 40  | 30 | 36 | 24 | 18 | 16 | 7  | 10 | 8  | 4  | 3  | 18 | 12 | 21 | 13 | 26 | 18 | 7  | 10 | 4  | 7  | 22 | 17 | 29 | 24 | 26 | 2  |    |    |   |    |
| ENSP0000335026,ENSP000001       | ENSG00000102119 | EMD3A    | 947  | 1    | 10  | 0.51E-05   | 8.24E-05   | 2.8968268   | 0.00015483 | 0.02265745 | 178        | 0          | 0   | 0  | 0  | 0  | 0  | 0  | 0  | 0  | 0  | 0  | 0  | 0  | 0  | 0  | 0  | 0  | 0  | 0  | 0  | 0  | 0  | 0  | 0  | 0  | 0  | 0  | 0  | 0  |    |   |    |
| ENSP0000306162,ENSP000001       | ENSG00000102038 | SMARCA1  | 2225 | 1    | 54  | 38         | 0.0019521  | 8.30E-05    | 1.2332828  | 0.00287977 | 0.60682556 | 102        | 10  | 7  | 3  | 1  | 1  | 2  | 1  | 1  | 3  | 6  | 4  | 2  | 1  | 2  | 2  | 3  | 3  | 1  | 5  | 3  | 0  | 1  | 1  | 0  | 3  | 2  | 3  |    |    |   |    |
| ENSP0000306570,ENSP000001       | ENSG00000102038 | SMARCA1  | 2225 | 1    | 54  | 38         | 0.0019521  | 8.30E-05    | 1.2332828  | 0.00287977 | 0.60682556 | 102        | 10  | 7  | 3  | 1  | 1  | 2  | 1  | 1  | 3  | 6  | 4  | 2  | 1  | 2  | 2  | 3  | 3  | 1  | 5  | 3  | 0  | 1  | 1  | 0  | 3  | 2  | 3  |    |    |   |    |
| ENSP0000306570,ENSP000001       | ENSG00000102038 | SMARCA1  | 2225 | 1    | 54  | 38         | 0.0019521  | 8.30E-05    | 1.2332828  | 0.00287977 | 0.60682556 | 102        | 10  | 7  | 3  | 1  | 1  | 2  | 1  | 1  | 3  | 6  | 4  | 2  | 1  | 2  | 2  | 3  | 3  | 1  | 5  | 3  | 0  | 1  | 1  | 0  | 3  | 2  | 3  |    |    |   |    |
| ENSP000030331979,NTD            | ENSG00000102054 | RBBP7    | 2924 | 1    | 19  | 108        | 0.0005789  | 0.0005789   | 0.0365862  | 0.82710334 | 0.94424554 | 267        | 10  | 11 | 9  | 8  | 10 | 8  | 4  | 7  | 16 | 4  | 5  | 11 | 6  | 6  | 10 | 14 | 12 | 8  | 10 | 12 | 5  | 17 | 11 | 6  | 13 | 8  | 11 |    |    |   |    |
| ENSP0000305501,ENSP000001       | ENSG00000102054 | RBBP7    | 2924 | 1    | 19  | 108        | 0.0005789  | 0.0005789   | 0.0365862  | 0.82710334 | 0.94424554 | 267        | 10  | 11 | 9  | 8  | 10 | 8  | 4  | 7  | 16 | 4  | 5  | 11 | 6  | 6  | 10 | 14 | 12 | 8  | 10 | 12 | 5  | 17 | 11 | 6  | 13 | 8  | 11 |    |    |   |    |
| ENSP0000247138,ENSP000001       | ENSG00000102100 | SLC35A2  | 5297 | 1    | 19  | 18         | 6.87E-05   | 3.93E-05    | 0.8042351  | 0.16487914 | 0.5        |            |     |    |    |    |    |    |    |    |    |    |    |    |    |    |    |    |    |    |    |    |    |    |    |    |    |    |    |    |    |   |    |



|                |                 |         |      |      |     |           |           |           |            |            |           |     |    |    |    |    |    |    |    |    |    |    |    |    |    |    |    |    |    |    |    |    |    |    |    |    |    |    |    |   |   |
|----------------|-----------------|---------|------|------|-----|-----------|-----------|-----------|------------|------------|-----------|-----|----|----|----|----|----|----|----|----|----|----|----|----|----|----|----|----|----|----|----|----|----|----|----|----|----|----|----|---|---|
| ENSP0000222567 | ENSP00000015849 | TWISTNB | 1478 | 342  | 11  | 24        | 3.98E-05  | 5.24E-05  | -0.392083  | 0.805161   | 0.7002659 | 35  | 0  | 0  | 1  | 1  | 1  | 2  | 2  | 1  | 0  | 2  | 2  | 0  | 2  | 1  | 1  | 1  | 1  | 2  | 2  | 3  | 1  | 1  | 2  | 1  | 0  | 1  |    |   |   |
| ENSP0000222572 | ENSP00000015854 | PONZ    | 2974 | 1    | 46  | 39        | 0.0001629 | 8.52E-05  | 0.964423   | 2.63E-05   | 0.0042218 | 85  | 7  | 4  | 4  | 13 | 4  | 5  | 5  | 2  | 2  | 1  | 0  | 2  | 2  | 4  | 0  | 1  | 1  | 4  | 3  | 3  | 2  | 2  | 3  | 2  | 0  | 3  | 2  |   |   |
| ENSP0000222577 | ENSP00000015859 | TPFN    | 2732 | 1    | 82  | 11        | 0.0002268 | 0.0001029 | 0.945177   | 0.0001474  | 0.0001474 | 21  | 1  | 0  | 0  | 0  | 0  | 0  | 0  | 0  | 0  | 0  | 0  | 0  | 0  | 0  | 0  | 0  | 0  | 0  | 0  | 0  | 0  | 0  | 0  | 0  | 0  | 0  | 0  |   |   |
| ENSP0000222644 | ENSP00000015926 | MPPE    | 524  | 1    | 24  | 38        | 8.68E-05  | 0.0033578 | 0.874653   | 0.9609517  | 0.0001629 | 62  | 4  | 4  | 1  | 0  | 0  | 2  | 3  | 4  | 3  | 2  | 1  | 2  | 4  | 1  | 3  | 3  | 1  | 1  | 1  | 1  | 0  | 0  | 0  | 0  | 0  | 0  |    |   |   |
| ENSP0000224231 | ENSP00000015930 | ZCH3AV1 | 5001 | 1    | 71  | 125       | 0.0002467 | 0.0007713 | -0.087146  | 0.6234087  | 0.8423419 | 196 | 8  | 6  | 6  | 4  | 5  | 1  | 7  | 9  | 6  | 11 | 5  | 3  | 5  | 9  | 7  | 5  | 6  | 6  | 5  | 7  | 9  | 6  | 6  | 11 | 6  | 4  | 11 |   |   |
| ENSP0000224273 | ENSP00000015933 | ODCH1   | 4802 | 1    | 206 | 25        | 0.0007449 | 0.0007071 | 0.0885271  | 0.7664669  | 0.9139536 | 531 | 21 | 6  | 15 | 15 | 17 | 17 | 12 | 18 | 18 | 9  | 20 | 12 | 12 | 12 | 17 | 14 | 14 | 17 | 17 | 42 | 18 | 11 | 16 | 21 | 18 | 19 | 10 |   |   |
| ENSP0000225644 | ENSP00000015953 | ASB14   | 5681 | 15   | 15  | 6         | 4.42E-05  | 0.0001029 | 0.945177   | 0.0001474  | 0.0001474 | 27  | 4  | 4  | 1  | 0  | 0  | 0  | 0  | 0  | 0  | 0  | 0  | 0  | 0  | 0  | 0  | 0  | 0  | 0  | 0  | 0  | 0  | 0  | 0  | 0  | 0  | 0  | 0  |   |   |
| ENSP0000347078 | ENSP00000015968 | H2AF2V  | 875  | 1    | 56  | 131       | 0.0002044 | 0.0002624 | -0.497455  | 0.0230824  | 0.1952764 | 107 | 8  | 3  | 6  | 4  | 5  | 1  | 2  | 4  | 5  | 4  | 3  | 8  | 4  | 10 | 8  | 6  | 3  | 11 | 7  | 9  | 9  | 6  | 6  | 8  | 3  | 11 | 5  |   |   |
| ENSP0000348577 | ENSP00000015972 | C7r0ZT  | 621  | 148  | 26  | 44        | 9.40E-05  | 0.0018605 | 0.9260109  | 0.9746513  | 0.0001629 | 50  | 1  | 4  | 4  | 2  | 2  | 1  | 3  | 1  | 2  | 0  | 1  | 3  | 3  | 4  | 3  | 2  | 4  | 5  | 0  | 0  | 0  | 0  | 0  | 0  | 0  | 0  | 0  |   |   |
| ENSP0000339139 | ENSP00000015974 | CAV1    | 4713 | 1    | 4   | 19        | 1.45E-05  | 1.15E-05  | -1.5210409 | 0.7440947  | 0.3449076 | 23  | 1  | 0  | 0  | 0  | 0  | 0  | 0  | 0  | 0  | 0  | 0  | 0  | 0  | 0  | 0  | 0  | 0  | 0  | 0  | 0  | 0  | 0  | 0  | 0  | 0  | 0  | 0  |   |   |
| ENSP0000317722 | ENSP00000015975 | SR1     | 4444 | 1    | 1   | 23        | 0.0001474 | 0.0001474 | 0.945177   | 0.0001474  | 0.0001474 | 27  | 4  | 4  | 1  | 0  | 0  | 0  | 0  | 0  | 0  | 0  | 0  | 0  | 0  | 0  | 0  | 0  | 0  | 0  | 0  | 0  | 0  | 0  | 0  | 0  | 0  | 0  | 0  | 0 |   |
| ENSP0000206177 | ENSP00000015993 | DNA8I6  | 1    | 54   | 80  | 0.0003551 | 0.0001748 | 0.159282  | 0.5791203  | 0.8233565  | 134       | 1   | 3  | 6  | 2  | 2  | 1  | 4  | 2  | 2  | 6  | 4  | 3  | 5  | 4  | 2  | 5  | 4  | 7  | 3  | 4  | 5  | 2  | 4  | 3  | 5  | 7  | 9  | 0  |   |   |
| ENSP0000339637 | ENSP00000016009 | C7r0ZT  | 216  | 1    | 6   | 23        | 2.89E-05  | 5.03E-05  | -0.972934  | 0.0512367  | 0.2953933 | 31  | 1  | 2  | 1  | 0  | 1  | 0  | 1  | 0  | 1  | 0  | 0  | 1  | 0  | 0  | 2  | 2  | 1  | 1  | 1  | 1  | 0  | 0  | 0  | 0  | 0  | 0  | 0  | 0 |   |
| ENSP0000265304 | ENSP00000016028 | SSB1    | 2570 | 1    | 157 | 240       | 0.0006756 | 0.0005441 | 0.1462527  | 0.7407316  | 0.7625276 | 397 | 15 | 7  | 10 | 17 | 13 | 10 | 12 | 14 | 26 | 9  | 14 | 14 | 3  | 8  | 10 | 16 | 15 | 13 | 15 | 15 | 12 | 11 | 15 | 12 | 17 | 17 | 17 |   |   |
| ENSP0000265314 | ENSP00000016028 | SSB1    | 2570 | 1    | 157 | 240       | 0.0006756 | 0.0005441 | 0.1462527  | 0.7407316  | 0.7625276 | 397 | 15 | 7  | 10 | 17 | 13 | 10 | 12 | 14 | 26 | 9  | 14 | 14 | 3  | 8  | 10 | 16 | 15 | 13 | 15 | 15 | 12 | 11 | 15 | 12 | 17 | 17 | 17 |   |   |
| ENSP0000265395 | ENSP00000016040 | HIBAD8  | 6333 | 1    | 57  | 86        | 0.0002606 | 0.0001892 | 0.1324785  | 0.5591821  | 0.8120725 | 143 | 5  | 3  | 2  | 5  | 6  | 9  | 4  | 7  | 2  | 6  | 2  | 3  | 4  | 6  | 7  | 4  | 4  | 5  | 4  | 6  | 5  | 8  | 4  | 5  | 2  | 2  |    |   |   |
| ENSP0000265395 | ENSP00000016052 | TAX1KPI | 2782 | 1    | 12  | 31        | 4.34E-05  | 6.77E-05  | -0.642912  | 0.56159025 | 0.8127804 | 143 | 5  | 3  | 2  | 5  | 6  | 9  | 4  | 7  | 2  | 6  | 2  | 3  | 4  | 6  | 7  | 4  | 4  | 5  | 4  | 6  | 5  | 8  | 4  | 5  | 2  | 2  |    |   |   |
| ENSP0000265394 | ENSP00000016066 | CPV1    | 3081 | 1    | 15  | 10        | 3.42E-05  | 2.19E-05  | -1.1128509 | 0.1085103  | 0.4116227 | 25  | 4  | 3  | 5  | 0  | 1  | 2  | 0  | 0  | 0  | 0  | 0  | 0  | 1  | 0  | 1  | 2  | 1  | 0  | 0  | 0  | 0  | 0  | 0  | 0  | 0  | 0  | 0  |   |   |
| ENSP0000222800 | ENSP00000016077 | ADK211  | 3425 | 1    | 57  | 158       | 0.0002006 | 0.0003424 | -1.7445691 | 0.0234647  | 0.6021889 | 215 | 2  | 1  | 5  | 4  | 6  | 3  | 4  | 8  | 5  | 7  | 6  | 3  | 4  | 8  | 4  | 3  | 7  | 6  | 18 | 9  | 14 | 20 | 13 | 18 | 9  | 6  | 3  |   |   |
| ENSP0000265136 | ENSP00000016078 | COBL    | 4696 | 1019 | 10  | 6         | 3.24E-05  | 1.31E-05  | 1.46328819 | 0.3792327  | 0.4751221 | 16  | 1  | 2  | 4  | 0  | 0  | 0  | 0  | 0  | 0  | 0  | 0  | 1  | 0  | 1  | 0  | 0  | 1  | 0  | 0  | 0  | 0  | 0  | 0  | 0  | 0  | 0  | 0  | 0 |   |
| ENSP0000373918 | ENSP00000016085 | GARS    | 3202 | 1    | 107 | 223       | 0.0000801 | 0.0007477 | -0.331103  | 0.2286171  | 0.5664494 | 330 | 9  | 3  | 11 | 8  | 5  | 14 | 10 | 6  | 17 | 14 | 3  | 7  | 6  | 13 | 12 | 13 | 17 | 8  | 9  | 3  | 10 | 13 | 20 | 32 | 14 | 18 | 0  |   |   |
| ENSP0000312644 | ENSP00000016144 | CA5P    | 4524 | 983  | 4   | 9         | 1.45E-05  | 1.97E-05  | -0.4480024 | 0.5711059  | 0.7945309 | 113 | 1  | 1  | 0  | 0  | 0  | 0  | 0  | 0  | 0  | 0  | 0  | 0  | 1  | 0  | 1  | 0  | 0  | 0  | 0  | 0  | 0  | 0  | 0  | 0  | 0  | 0  | 0  |   |   |
| ENSP0000252887 | ENSP00000016144 | CA5P    | 4524 | 983  | 4   | 9         | 1.45E-05  | 1.97E-05  | -0.4480024 | 0.5711059  | 0.7945309 | 113 | 1  | 1  | 0  | 0  | 0  | 0  | 0  | 0  | 0  | 0  | 0  | 0  | 1  | 0  | 1  | 0  | 0  | 0  | 0  | 0  | 0  | 0  | 0  | 0  | 0  | 0  | 0  | 0 |   |
| ENSP0000248553 | ENSP00000016021 | HSR81   | 2451 | 1    | 73  | 109       | 0.0002639 | 0.0004568 | -0.791212  | 0.0613913  | 0.3188942 | 282 | 15 | 12 | 7  | 3  | 5  | 4  | 2  | 0  | 2  | 8  | 7  | 14 | 9  | 16 | 10 | 17 | 18 | 26 | 2  | 0  | 0  | 0  | 0  | 0  | 0  | 0  | 0  | 0 |   |
| ENSP0000222968 | ENSP00000016044 | POAP1   | 2001 | 1    | 81  | 232       | 0.0002928 | 0.0002881 | 0.0217788  | 0.9143308  | 0.9727321 | 213 | 9  | 6  | 5  | 4  | 6  | 7  | 5  | 13 | 5  | 8  | 6  | 7  | 4  | 6  | 10 | 5  | 12 | 5  | 12 | 6  | 8  | 5  | 6  | 8  | 5  | 9  | 11 | 0 |   |
| ENSP0000222969 | ENSP00000016045 | BDU31   | 514  | 120  | 11  | 21        | 3.98E-05  | 4.59E-05  | -0.2065612 | 0.6553999  | 0.8505516 | 32  | 1  | 0  | 0  | 0  | 0  | 0  | 0  | 0  | 0  | 0  | 0  | 1  | 2  | 0  | 0  | 1  | 2  | 2  | 0  | 1  | 1  | 1  | 1  | 1  | 1  | 1  | 1  | 1 |   |
| ENSP0000292478 | ENSP00000016045 | PTFC1   | 379  | 17   | 17  | 3         | 0.0001474 | 0.0001474 | 0.945177   | 0.0001474  | 0.0001474 | 27  | 4  | 4  | 1  | 0  | 0  | 0  | 0  | 0  | 0  | 0  | 0  | 0  | 0  | 0  | 0  | 0  | 0  | 0  | 0  | 0  | 0  | 0  | 0  | 0  | 0  | 0  | 0  | 0 |   |
| ENSP0000316168 | ENSP00000016043 | EF3B    | 3687 | 1    | 209 | 391       | 0.0007554 | 0.0008546 | -0.173431  | 0.2251683  | 0.8056516 | 600 | 33 | 16 | 20 | 17 | 18 | 20 | 14 | 20 | 21 | 21 | 11 | 20 | 9  | 18 | 22 | 22 | 22 | 25 | 19 | 22 | 18 | 9  | 12 | 43 | 26 | 25 | 2  | 2 |   |
| ENSP0000222990 | ENSP00000016066 | SNX8    | 4085 | 919  | 23  | 29        | 8.31E-05  | 6.39E-05  | 0.9190355  | 0.5905324  | 0.487055  | 32  | 3  | 2  | 1  | 2  | 2  | 3  | 3  | 2  | 2  | 1  | 2  | 2  | 2  | 2  | 2  | 1  | 3  | 1  | 0  | 0  | 0  | 0  | 0  | 0  | 0  | 0  | 0  | 0 |   |
| ENSP0000339503 | ENSP00000016068 | NUD1    | 1539 | 363  | 13  | 23        | 4.70E-05  | 5.03E-05  | -0.0967996 | 0.8093953  | 0.9339456 | 36  | 3  | 1  | 2  | 0  | 0  | 0  | 0  | 0  | 0  | 0  | 0  | 0  | 1  | 3  | 1  | 3  | 1  | 2  | 0  | 0  | 0  | 0  | 0  | 0  | 0  | 0  | 0  | 0 | 0 |
| ENSP0000344537 | ENSP00000016069 | SR1     | 4444 | 1    | 1   | 23        | 0.0001474 | 0.0001474 | 0.945177   | 0.0001474  | 0.0001474 | 27  | 4  | 4  | 1  | 0  | 0  | 0  | 0  | 0  | 0  | 0  | 0  | 0  | 0  | 0  | 0  | 0  | 0  | 0  | 0  | 0  | 0  | 0  | 0  | 0  | 0  | 0  | 0  | 0 | 0 |
| ENSP0000223023 | ENSP00000016099 | WASL    | 997  | 235  | 10  | 26        | 3.26E-05  | 5.68E-05  | -0.652189  | 0.1524238  | 0.4858819 | 36  | 1  | 2  | 0  | 0  | 0  | 0  | 0  | 0  | 0  | 0  | 0  | 2  | 3  | 0  | 1  | 0  | 1  | 3  | 1  | 2  | 2  | 0  | 0  | 0  | 0  | 0  | 0  | 0 |   |
| ENSP0000223029 | ENSP00000016105 | STAG13  | 3504 | 1    | 6   | 6         | 2.17E-05  | 0.17E-05  | 0.7263259  | 0.4253102  | 0.7293027 | 12  | 0  | 2  | 0  | 0  | 0  | 0  | 0  | 0  | 0  | 0  | 0  | 1  | 0  | 0  | 0  | 0  | 1  | 0  | 0  | 0  | 0  | 0  | 0  | 0  | 0  | 0  | 0  | 0 |   |
| ENSP0000223073 | ENSP00000016104 | RMZ8    | 2968 | 1    | 70  | 121       | 0.0002503 | 0.0002499 | -0.0625276 | 0.8037649  | 0.9312778 | 191 | 10 | 14 | 6  | 4  | 5  | 3  | 6  | 4  | 8  | 4  | 10 | 4  | 4  | 2  | 8  | 9  | 8  | 9  | 5  | 10 | 9  | 8  | 3  |    |    |    |    |   |   |





















| ENSP0000338607 | ENSG00000130193 | Chr8F55  | 1909 | 1    | 46   | 61   | 0.00016629 | 0.00013329 | 0.31914721 | 0.2265566  | 0.56170974 | 107 | 4   | 4  | 2  | 7  | 4   | 6   | 7   | 2  | 4   | 0   | 2   | 4  | 2  | 2  | 2  | 2   | 3   | 6  | 4   | 4  | 4   | 4  | 3   | 4   | 7   | 4   | 2  | 3  | 5  |    |
|----------------|-----------------|----------|------|------|------|------|------------|------------|------------|------------|------------|-----|-----|----|----|----|-----|-----|-----|----|-----|-----|-----|----|----|----|----|-----|-----|----|-----|----|-----|----|-----|-----|-----|-----|----|----|----|----|
| ENSP0000252483 | ENSG00000130202 | PWR2     | 4046 | 1    | 16   | 29   | 5.798705   | 6.34e-05   | -0.1330584 | 0.7345562  | 0.88807778 | 45  | 4   | 0  | 1  | 0  | 0   | 0   | 0   | 0  | 0   | 0   | 0   | 0  | 0  | 0  | 0  | 0   | 0   | 0  | 0   | 0  | 0   | 0  | 0   | 0   | 0   | 0   | 0  | 0  | 0  | 0  |
| ENSP0000252484 | ENSG00000130203 | APCE     | 3593 | 1    | 88   | 0    | 0.0023812  | 1.2E-12    | 27.959000  | 6.8745e-05 | 0.0058664  | 88  | 23  | 27 | 29 | 0  | 0   | 0   | 0   | 0  | 0   | 0   | 0   | 0  | 0  | 0  | 0  | 0   | 0   | 0  | 0   | 0  | 0   | 0  | 0   | 0   | 0   | 0   | 0  | 0  | 0  |    |
| ENSP0000252487 | ENSG00000130204 | TTMOM40  | 3765 | 1    | 133  | 198  | 0.0004808  | 0.0003264  | 0.15224841 | 0.30027293 | 0.6933245  | 331 | 137 | 7  | 9  | 7  | 8   | 10  | 11  | 15 | 12  | 26  | 7   | 13 | 8  | 7  | 11 | 11  | 13  | 11 | 8   | 10 | 13  | 16 | 9   | 10  | 14  | 9   | 10 | 18 | 10 | 10 |
| ENSP0000252512 | ENSG00000130227 | XF07     | 4753 | 1    | 51   | 86   | 0.0003447  | 0.0001924  | -0.0275681 | 0.02672994 | 0.9748714  | 131 | 17  | 7  | 9  | 7  | 6   | 3   | 1   | 1  | 5   | 2   | 4   | 2  | 5  | 2  | 4  | 2   | 5   | 3  | 7   | 7  | 7   | 7  | 1   | 1   | 6   | 5   | 8  | 7  | 10 |    |
| ENSP0000252513 | ENSG00000130234 | FAM8C    | 2403 | 4    | 4    | 22   | 0.0001527  | 0.0000116  | 0.1731019  | 0.00019639 | 0.9796339  | 18  | 1   | 0  | 0  | 0  | 0   | 0   | 0   | 0  | 0   | 0   | 0   | 0  | 0  | 0  | 0  | 0   | 0   | 0  | 0   | 0  | 0   | 0  | 0   | 0   | 0   | 0   | 0  | 0  | 0  | 0  |
| ENSP0000252542 | ENSG00000130254 | SARF2    | 4103 | 1    | 128  | 168  | 0.0004427  | 0.0003079  | 0.33405517 | 0.09215668 | 0.8061159  | 296 | 14  | 16 | 6  | 8  | 10  | 11  | 10  | 15 | 16  | 12  | 10  | 6  | 8  | 7  | 6  | 8   | 7   | 5  | 9   | 17 | 10  | 13 | 12  | 10  | 5   | 8   | 7  | 0  | 0  | 0  |
| ENSP0000252543 | ENSG00000130255 | RR36     | 4242 | 1    | 150  | 267  | 0.0005425  | 0.0005841  | 0.0563933  | 0.05877427 | 0.8557427  | 447 | 12  | 15 | 8  | 15 | 21  | 11  | 17  | 9  | 9   | 11  | 11  | 11 | 10 | 12 | 9  | 16  | 20  | 14 | 17  | 18 | 16  | 16 | 16  | 12  | 10  | 13  | 19 | 9  | 0  | 0  |
| ENSP0000252576 | ENSG00000130288 | NDFJF13  | 414  | 1    | 52   | 108  | 0.0001798  | 0.0000959  | -0.3281252 | 0.05872588 | 0.31248503 | 100 | 4   | 5  | 1  | 4  | 5   | 6   | 3   | 5  | 7   | 3   | 6   | 4  | 5  | 2  | 5  | 5   | 9   | 4  | 5   | 4  | 8   | 7  | 6   | 8   | 4   | 9   | 7  | 6  | 0  | 0  |
| ENSP0000252821 | ENSG00000130311 | GT9P3    | 612  | 1    | 10   | 5    | 1.421125   | 0.0000000  | 0.2199     | 0.0000000  | 0.4632868  | 13  | 0   | 0  | 0  | 0  | 0   | 0   | 0   | 0  | 0   | 0   | 0   | 0  | 0  | 0  | 0  | 0   | 0   | 0  | 0   | 0  | 0   | 0  | 0   | 0   | 0   | 0   | 0  | 0  | 0  | 0  |
| ENSP0000252833 | ENSG00000130323 | BT52     | 5753 | 1237 | 8    | 8    | 2.89e-05   | 1.77e-05   | 0.7623259  | 0.3514878  | 0.3675567  | 16  | 1   | 0  | 0  | 0  | 0   | 0   | 0   | 0  | 0   | 0   | 0   | 0  | 0  | 0  | 0  | 0   | 0   | 0  | 0   | 0  | 0   | 0  | 0   | 0   | 0   | 0   | 0  | 0  | 0  | 0  |
| ENSP0000252936 | ENSG00000130304 | SLC7L1   | 2424 | 1    | 1    | 9    | 8.26e-05   | 1.97e-05   | -0.4436024 | 0.0109756  | 0.1738481  | 10  | 1   | 0  | 0  | 0  | 0   | 0   | 0   | 0  | 0   | 0   | 0   | 0  | 0  | 0  | 0  | 0   | 0   | 0  | 0   | 0  | 0   | 0  | 0   | 0   | 0   | 0   | 0  | 0  | 0  |    |
| ENSP0000252944 | ENSG00000130305 | GLT2D1   | 4841 | 1    | 35   | 0    | 0.0001235  | 0.0000000  | 0.0000000  | 0.0000000  | 0.8467609  | 26  | 3   | 0  | 0  | 0  | 0   | 0   | 0   | 0  | 0   | 0   | 0   | 0  | 0  | 0  | 0  | 0   | 0   | 0  | 0   | 0  | 0   | 0  | 0   | 0   | 0   | 0   | 0  | 0  | 0  | 0  |
| ENSP0000252959 | ENSG00000130309 | GLT2D2   | 1173 | 1    | 57   | 107  | 0.0002606  | 0.0003308  | -0.1822544 | 0.5366269  | 0.8010603  | 164 | 11  | 8  | 10 | 2  | 2   | 2   | 4   | 2  | 4   | 3   | 2   | 6  | 5  | 9  | 4  | 5   | 8   | 12 | 10  | 2  | 1   | 2  | 9   | 6   | 8   | 4   | 6  | 5  | 0  | 0  |
| ENSP0000252982 | ENSG00000130311 | DOA1     | 2393 | 1    | 8    | 16   | 2.89e-05   | 5.27e-06   | -0.2736774 | 0.6302482  | 0.8617548  | 20  | 1   | 0  | 0  | 0  | 0   | 0   | 0   | 0  | 0   | 0   | 0   | 0  | 0  | 0  | 0  | 0   | 0   | 0  | 0   | 0  | 0   | 0  | 0   | 0   | 0   | 0   | 0  | 0  | 0  | 0  |
| ENSP0000252983 | ENSG00000130313 | PGLS     | 6091 | 1296 | 40   | 37   | 0.0003446  | 0.0001236  | 0.2409576  | 0.4251568  | 0.7292739  | 96  | 2   | 5  | 2  | 3  | 9   | 2   | 3   | 2  | 2   | 5   | 2   | 3  | 6  | 2  | 3  | 5   | 2   | 4  | 4   | 3  | 2   | 1  | 4   | 3   | 4   | 2   | 3  | 3  | 0  | 0  |
| ENSP0000252984 | ENSG00000130314 | SWK5     | 358  | 1    | 8    | 6    | 8.06e-05   | 8.06e-05   | -1.48308   | 0.013299   | 0.16928078 | 19  | 0   | 0  | 0  | 0  | 0   | 0   | 0   | 0  | 0   | 0   | 0   | 0  | 0  | 0  | 0  | 0   | 0   | 0  | 0   | 0  | 0   | 0  | 0   | 0   | 0   | 0   | 0  | 0  | 0  | 0  |
| ENSP0000253859 | ENSG00000130347 | RTN4P1   | 4681 | 1015 | 17   | 28   | 6.15e-05   | 6.12e-05   | 0.00643051 | 0.9837042  | 0.99488808 | 45  | 3   | 2  | 1  | 3  | 1   | 3   | 0   | 0  | 0   | 0   | 0   | 0  | 0  | 0  | 0  | 0   | 0   | 0  | 0   | 0  | 0   | 0  | 0   | 0   | 0   | 0   | 0  | 0  | 0  | 0  |
| ENSP0000253859 | ENSG00000130348 | QNSL1    | 3558 | 809  | 3    | 18   | 1.08e-05   | 9.39e-05   | -1.8586399 | 0.03187866 | 0.22691338 | 21  | 1   | 0  | 0  | 0  | 0   | 0   | 0   | 0  | 0   | 0   | 0   | 0  | 0  | 0  | 0  | 0   | 0   | 0  | 0   | 0  | 0   | 0  | 0   | 0   | 0   | 0   | 0  | 0  | 0  | 0  |
| ENSP0000253951 | ENSG00000130349 | C6orf303 | 4913 | 1    | 17   | 17   | 1.81e-05   | 3.71e-05   | -0.1932111 | 0.1336645  | 0.4479104  | 22  | 0   | 0  | 0  | 0  | 0   | 0   | 0   | 0  | 0   | 0   | 0   | 0  | 0  | 0  | 0  | 0   | 0   | 0  | 0   | 0  | 0   | 0  | 0   | 0   | 0   | 0   | 0  | 0  | 0  | 0  |
| ENSP0000254092 | ENSG00000130350 | MLT2A    | 2953 | 1    | 48   | 22   | 0.0001352  | 0.0001769  | -0.0205689 | 0.0399592  | 0.902285   | 129 | 5   | 4  | 5  | 2  | 2   | 11  | 3   | 6  | 2   | 3   | 3   | 6  | 5  | 3  | 2  | 4   | 12  | 8  | 11  | 6  | 4   | 3  | 6   | 4   | 3   | 6   | 4  | 0  | 0  |    |
| ENSP0000254092 | ENSG00000130356 | MLT4     | 3062 | 1    | 52   | 85   | 0.0001978  | 0.0001873  | 0.01737137 | 0.9599883  | 0.9839596  | 137 | 6   | 4  | 5  | 2  | 2   | 11  | 6   | 9  | 3   | 2   | 6   | 5  | 4  | 2  | 4  | 12  | 8   | 11 | 6   | 4  | 2   | 5  | 3   | 0   | 0   | 0   | 0  | 0  | 0  | 0  |
| ENSP0000252699 | ENSG00000130402 | ACTN4    | 892  | 1    | 1411 | 1779 | 0.0001007  | 0.0003782  | 0.3197407  | 0.01395244 | 0.1489705  | 310 | 99  | 83 | 74 | 86 | 170 | 112 | 111 | 91 | 248 | 120 | 118 | 76 | 60 | 75 | 98 | 128 | 101 | 99 | 124 | 94 | 123 | 88 | 135 | 118 | 155 | 110 | 93 | 73 | 69 |    |
| ENSP0000252711 | ENSG00000130414 | NDFJF10  | 1280 | 1    | 51   | 82   | 0.0001847  | 0.0001798  | 0.0411993  | 0.8510122  | 0.9524513  | 113 | 9   | 3  | 4  | 2  | 7   | 3   | 3   | 4  | 4   | 4   | 4   | 4  | 3  | 2  | 9  | 6   | 5   | 5  | 7   | 3  | 4   | 4  | 7   | 4   | 5   | 4   | 7  | 4  | 0  | 0  |
| ENSP0000252725 | ENSG00000130415 | NDFJF11  | 1836 | 1    | 17   | 21   | 4.50e-05   | 0.0000000  | 0.1272727  | 0.4234984  | 0.9898194  | 88  | 6   | 15 | 4  | 1  | 2   | 2   | 2   | 2  | 2   | 2   | 2   | 2  | 2  | 2  | 2  | 2   | 2   | 2  | 2   | 2  | 2   | 2  | 2   | 2   | 2   | 2   | 2  | 2  | 2  | 2  |
| ENSP0000252733 | ENSG00000130479 | MDJF5    | 1985 | 1270 | 11   | 40   | 3.98e-05   | 8.74e-05   | -1.1351739 | 0.1881192  | 0.188723   | 51  | 2   | 0  | 0  | 0  | 0   | 0   | 0   | 0  | 0   | 0   | 0   | 0  | 0  | 0  | 0  | 0   | 0   | 0  | 0   | 0  | 0   | 0  | 0   | 0   | 0   | 0   | 0  | 0  | 0  | 0  |
| ENSP0000252785 | ENSG00000130480 | SCD2     | 1848 | 340  | 9    | 14   | 3.25e-05   | 3.96e-05   | -0.2736774 | 0.4315145  | 0.1747397  | 19  | 0   | 0  | 0  | 0  | 0   | 0   | 0   | 0  | 0   | 0   | 0   | 0  | 0  | 0  | 0  | 0   | 0   | 0  | 0   | 0  | 0   | 0  | 0   | 0   | 0   | 0   | 0  | 0  | 0  | 0  |
| ENSP0000252809 | ENSG00000130513 | GF15     | 2741 | 1    | 51   | 18   | 1.81e-05   | 3.06e-05   | -0.7591042 | 0.1414666  | 0.7200057  | 19  | 0   | 0  | 0  | 0  | 0   | 0   | 0   | 0  | 0   | 0   | 0   | 0  | 0  | 0  | 0  | 0   | 0   | 0  | 0   | 0  | 0   | 0  | 0   | 0   | 0   | 0   | 0  | 0  | 0  | 0  |
| ENSP0000252816 | ENSG00000130522 | LSM4     | 638  | 1    | 59   | 0    | 0.0001212  | 0.0004015  | 0.0000000  | 0.0000000  | 0.8564819  | 28  | 0   | 0  | 0  | 0  | 0   | 0   | 0   | 0  | 0   | 0   | 0   | 0  | 0  | 0  | 0  | 0   | 0   | 0  | 0   | 0  | 0   | 0  | 0   | 0   | 0   | 0   | 0  | 0  | 0  | 0  |
| ENSP0000252818 | ENSG00000130522 | JUND     | 6444 | 1374 | 3    | 16   | 1.08e-05   | 3.50e-05   | -1.6887149 | 0.0235449  | 0.2031786  | 19  | 0   | 0  | 0  | 0  | 0   | 0   | 0   | 0  | 0   | 0   | 0   | 0  | 0  | 0  | 0  | 0   | 0   | 0  | 0   | 0  | 0   | 0  | 0   | 0   | 0   | 0   | 0  | 0  | 0  | 0  |
| ENSP0000252826 | ENSG00000130529 | TRPM4    | 6265 | 1    | 15   | 13   | 5.42e-05   | 2.84e-05   | 0.9327747  | 0.0647758  | 0.3276073  | 28  | 2   | 1  | 0  | 0  | 0   | 0   | 0   | 0  | 0   | 0   | 0   | 0  | 0  | 0  | 0  | 0   | 0   | 0  | 0   | 0  | 0   | 0  | 0   | 0   | 0   | 0   | 0  | 0  | 0  | 0  |
| ENSP0000252834 | ENSG00000130529 | CAMSPA1  | 5135 | 1    | 4    | 14   | 1.45e-05   | 3.06e-05   | -1.0810323 | 0.2902423  | 0.6292784  | 18  | 0   | 2  | 0  | 0  | 0   | 0   | 0   | 0  | 0   | 0   | 0   | 0  | 0  | 0  | 0  | 0   | 0   | 0  | 0   | 0  | 0   | 0  | 0   | 0   | 0   | 0   | 0  | 0  | 0  | 0  |
| ENSP0000252834 | ENSG00000130530 | ATXN10   | 5179 | 1    | 70   | 162  | 0.0002935  | 0.0003398  |            |            |            |     |     |    |    |    |     |     |     |    |     |     |     |    |    |    |    |     |     |    |     |    |     |    |     |     |     |     |    |    |    |    |

| ENSP0000254636,ENSP000001,ENSG00000132005 | IMMT    | 5788 | 1   | 285 | 440       | 0.000103028 | 0.000961643 | 0.099978099 | 0.434823302 | 0.736678778 | 725 | 27 | 18 | 17 | 18 | 26 | 20 | 29 | 19 | 21 | 38 | 20 | 30 | 15 | 24 | 19 | 19 | 19 | 26 | 32 | 32 | 32 | 31 | 30 | 37 | 25 | 20 | 29 | 24 | 21 |    |    |
|-------------------------------------------|---------|------|-----|-----|-----------|-------------|-------------|-------------|-------------|-------------|-----|----|----|----|----|----|----|----|----|----|----|----|----|----|----|----|----|----|----|----|----|----|----|----|----|----|----|----|----|----|----|----|
| ENSP0000387093,ENSP000001,ENSG00000132005 | IMMT    | 5787 | 1   | 92  | 140       | 0.000032528 | 0.000035951 | 0.120001533 | 0.084860262 | 0.800277930 | 232 | 11 | 4  | 8  | 5  | 10 | 11 | 2  | 6  | 9  | 4  | 12 | 4  | 4  | 6  | 6  | 7  | 10 | 7  | 7  | 15 | 7  | 11 | 6  | 6  | 5  | 8  | 8  |    |    |    |    |
| ENSP0000254663,ENSP000001,ENSG00000132334 | SCV     | 422  | 1   | 31  | 1         | 1.624094666 |             |             |             |             | 41  | 0  | 0  | 2  | 3  | 1  | 1  | 1  | 1  | 0  | 0  | 0  | 0  | 0  | 0  | 0  | 0  | 0  | 0  | 0  | 0  | 0  | 0  | 0  | 0  | 0  | 0  | 0  | 0  | 0  | 0  |    |
| ENSP0000254672,ENSP000001,ENSG00000132334 | PTPR    | 480  | 1   | 3   | 12        | 1.088205    | 2.6265      | -2.376774   | 0.1878474   | 0.528999753 | 15  | 0  | 0  | 0  | 0  | 0  | 0  | 0  | 0  | 0  | 0  | 0  | 0  | 0  | 0  | 0  | 0  | 0  | 0  | 0  | 0  | 0  | 0  | 0  | 0  | 0  | 0  | 0  | 0  | 0  | 0  |    |
| ENSP0000376716,R16G,ENSG00000132334       | RAN     | 2209 | 1   | 198 | 176       | 0.000000427 | 0.00038457  | -0.1183992  | 0.6177757   | 0.6863518   | 274 | 16 | 7  | 8  | 7  | 12 | 9  | 8  | 6  | 8  | 7  | 7  | 7  | 8  | 6  | 9  | 13 | 9  | 11 | 14 | 10 | 9  | 5  | 6  | 12 | 14 | 10 | 16 | 9  | 8  |    |    |
| ENSP0000254690,ENSP000001,ENSG00000132356 | PKRAA1  | 4409 | 1   | 17  | 13        | 3.987405    | 3.7165      | -0.9829177  | 0.83355819  | 0.94606774  | 28  | 1  | 1  | 1  | 1  | 2  | 1  | 1  | 1  | 1  | 1  | 0  | 0  | 0  | 0  | 0  | 0  | 0  | 0  | 0  | 0  | 0  | 0  | 0  | 0  | 0  | 0  | 0  | 0  | 0  | 0  | 0  |
| ENSP0000320488,ENSP000001,ENSG00000132356 | SRFB18  | 1324 | 1   | 94  | 158       | 0.000032068 | 0.000024639 | 0.000000000 | 0.000000000 | 0.000000000 | 27  | 12 | 11 | 11 | 11 | 11 | 11 | 11 | 11 | 11 | 11 | 11 | 11 | 11 | 11 | 11 | 11 | 11 | 11 | 11 | 11 | 11 | 11 | 11 | 11 | 11 | 11 | 11 | 11 | 11 | 11 | 11 |
| ENSP0000370968,R194AG,ENSG00000132382     | MYBBP1A | 1895 | 1   | 14  | 47        | 5.066305    | 0.00001027  | -1.0209113  | 0.04168618  | 0.2611770   | 61  | 1  | 1  | 2  | 0  | 0  | 0  | 0  | 0  | 0  | 0  | 0  | 0  | 0  | 0  | 0  | 0  | 0  | 0  | 0  | 0  | 0  | 0  | 0  | 0  | 0  | 0  | 0  | 0  | 0  | 0  | 0  |
| ENSP0000370968,R970AW,ENSG00000132382     | MYBBP1A | 4065 | 1   | 7   | 22        | 5.33825     | 4.8105      | -0.9257541  | 0.2537578   | 0.59407312  | 29  | 0  | 0  | 0  | 0  | 0  | 0  | 0  | 0  | 0  | 0  | 0  | 0  | 0  | 0  | 0  | 0  | 0  | 0  | 0  | 0  | 0  | 0  | 0  | 0  | 0  | 0  | 0  | 0  | 0  | 0  | 0  |
| ENSP0000254719,ENSP000001,ENSG00000132382 | MYBBP1A | 4066 | 1   | 24  | 4         | 3.888305    | 9.6105      | -0.148465   | 0.8172838   | 0.9213984   | 68  | 0  | 0  | 0  | 0  | 0  | 0  | 0  | 0  | 0  | 0  | 0  | 0  | 0  | 0  | 0  | 0  | 0  | 0  | 0  | 0  | 0  | 0  | 0  | 0  | 0  | 0  | 0  | 0  | 0  | 0  | 0  |
| ENSP0000254719,ENSP000001,ENSG00000132382 | MYBBP1A | 2996 | 1   | 104 | 149       | 0.000037399 | 0.000000000 | 0.000000000 | 0.000000000 | 0.000000000 | 28  | 12 | 11 | 11 | 11 | 11 | 11 | 11 | 11 | 11 | 11 | 11 | 11 | 11 | 11 | 11 | 11 | 11 | 11 | 11 | 11 | 11 | 11 | 11 | 11 | 11 | 11 | 11 | 11 | 11 | 11 | 11 |
| ENSP0000254730,ENSP000001,ENSG00000132394 | EFEFC   | 1499 | 1   | 335 | 11        | 4.668305    | 1.3105      | 1.6007911   | 0.03026734  | 0.22057424  | 17  | 10 | 0  | 0  | 0  | 0  | 0  | 0  | 0  | 0  | 0  | 0  | 0  | 0  | 0  | 0  | 0  | 0  | 0  | 0  | 0  | 0  | 0  | 0  | 0  | 0  | 0  | 0  | 0  | 0  | 0  |    |
| ENSP0000373201,ENSG00000132423            | TMEM128 | 2135 | 518 | 7   | 8         | 2.536305    | 1.7505      | 0.5367752   | 0.44296     | 0.7431724   | 15  | 0  | 0  | 0  | 0  | 0  | 0  | 0  | 0  | 0  | 0  | 0  | 0  | 0  | 0  | 0  | 0  | 0  | 0  | 0  | 0  | 0  | 0  | 0  | 0  | 0  | 0  | 0  | 0  | 0  | 0  |    |
| ENSP0000254759,ENSP000001,ENSG00000132423 | COG3    | 3170 | 217 | 27  | 45        | 9.760305    | 9.8405      | -0.101643   | 0.9728266   | 0.989388    | 72  | 3  | 1  | 1  | 1  | 1  | 1  | 1  | 1  | 1  | 1  | 1  | 1  | 1  | 1  | 1  | 1  | 1  | 1  | 1  | 1  | 1  | 1  | 1  | 1  | 1  | 1  | 1  | 1  | 1  | 1  |    |
| ENSP000035942,ENSP000001,ENSG00000132423  | SRFB18  | 1324 | 1   | 2   | 2.8405    | 0.0000000   | 0.0000000   | 0.0000000   | 0.0000000   | 0.0000000   | 105 | 0  | 0  | 0  | 0  | 0  | 0  | 0  | 0  | 0  | 0  | 0  | 0  | 0  | 0  | 0  | 0  | 0  | 0  | 0  | 0  | 0  | 0  | 0  | 0  | 0  | 0  | 0  | 0  | 0  | 0  |    |
| ENSP0000254770,ENSP000001,ENSG00000132434 | LANCL2  | 2608 | 1   | 33  | 60        | 0.0001193   | 0.0001193   | 0.1361739   | 0.6268591   | 0.8425419   | 93  | 3  | 1  | 1  | 5  | 3  | 5  | 2  | 1  | 2  | 1  | 6  | 1  | 3  | 2  | 1  | 3  | 5  | 4  | 4  | 5  | 4  | 1  | 1  | 7  | 4  | 3  | 1  | 3  |    |    |    |
| ENSP0000349536,ENSP000001,ENSG00000132436 | FIGL1L  | 2458 | 1   | 11  | 12        | 3.988305    | 2.6265      | 0.6007911   | 0.0221137   | 0.7145767   | 23  | 0  | 0  | 2  | 1  | 0  | 1  | 1  | 1  | 1  | 1  | 1  | 1  | 0  | 0  | 0  | 2  | 1  | 4  | 0  | 0  | 0  | 0  | 0  | 0  | 0  | 0  | 0  | 0  | 0  | 0  | 0  |
| ENSP0000254799,ENSP000001,ENSG00000132463 | GSPF1   | 1337 | 1   | 47  | 97        | 0.0001591   | 0.00021295  | -0.3190024  | 0.3154754   | 0.6465138   | 104 | 3  | 1  | 8  | 4  | 3  | 7  | 0  | 9  | 5  | 2  | 2  | 2  | 1  | 7  | 10 | 5  | 4  | 6  | 8  | 2  | 3  | 10 | 4  | 8  | 6  | 4  | 7  |    |    |    |    |
| ENSP000035942,ENSP000001,ENSG00000132467  | SRFB18  | 1324 | 1   | 2   | 2.8405    | 0.0000000   | 0.0000000   | 0.0000000   | 0.0000000   | 0.0000000   | 105 | 0  | 0  | 0  | 0  | 0  | 0  | 0  | 0  | 0  | 0  | 0  | 0  | 0  | 0  | 0  | 0  | 0  | 0  | 0  | 0  | 0  | 0  | 0  | 0  | 0  | 0  | 0  | 0  | 0  | 0  |    |
| ENSP0000254803,ENSP000001,ENSG00000132467 | UTP3    | 534  | 1   | 74  | 0.0001265 | 0.00001619  | 0.3538478   | 0.4057263   | 0.7155698   | 0.9999999   | 50  | 5  | 0  | 5  | 0  | 1  | 2  | 1  | 1  | 1  | 1  | 1  | 1  | 1  | 1  | 1  | 3  | 4  | 6  | 3  | 6  | 8  | 0  | 3  | 7  | 1  | 2  | 2  | 4  |    |    |    |
| ENSP0000344079,ENSP000001,ENSG00000132470 | ITGB4   | 1599 | 1   | 274 | 276       | 0.0000951   | 0.0000000   | 0.7158302   | 0.0748485   | 0.3490578   | 550 | 3  | 3  | 29 | 55 | 41 | 20 | 14 | 22 | 42 | 20 | 22 | 22 | 11 | 16 | 8  | 24 | 16 | 11 | 12 | 13 | 39 | 37 | 30 | 24 | 17 | 10 | 0  | 0  | 0  | 0  |    |
| ENSP0000200181,ENSP000001,ENSG00000132470 | ITGB4   | 1598 | 1   | 275 | 270       | 0.0000943   | 0.0000000   | 0.7261229   | 0.0799873   | 0.3430727   | 550 | 3  | 3  | 29 | 55 | 41 | 20 | 14 | 22 | 42 | 20 | 22 | 11 | 16 | 8  | 24 | 16 | 11 | 12 | 13 | 39 | 37 | 30 | 24 | 17 | 10 | 0  | 0  | 0  | 0  |    |    |
| ENSP0000254806,ENSP000001,ENSG00000132481 | TRIM47  | 1469 | 1   | 3   | 18        | 1.088305    | 1.938305    | -0.1858399  | 0.8212502   | 0.3621365   | 101 | 1  | 1  | 1  | 1  | 0  | 0  | 0  | 0  | 0  | 0  | 0  | 0  | 0  | 0  | 0  | 0  | 0  | 0  | 0  | 0  | 0  | 0  | 0  | 0  | 0  | 0  | 0  | 0  | 0  | 0  |    |
| ENSP0000395958,ENSP000001,ENSG00000132485 | ZKSCAN2 | 1465 | 1   | 36  | 75        | 0.0001014   | 0.0001014   | 0.8836393   | 0.3325711   | 0.2388113   | 111 | 4  | 3  | 5  | 3  | 2  | 1  | 3  | 2  | 3  | 2  | 3  | 2  | 2  | 2  | 5  | 6  | 4  | 7  | 2  | 3  | 2  | 6  | 2  | 6  | 4  | 2  | 12 | 5  |    |    |    |
| ENSP0000387093,ENSP000001,ENSG00000132507 | EFSAL1L | 508  | 1   | 141 | 349       | 0.00005972  | 0.00007259  | -0.5812093  | 0.0004372   | 0.021198827 | 490 | 14 | 10 | 10 | 14 | 15 | 16 | 11 | 6  | 11 | 14 | 9  | 9  | 17 | 19 | 17 | 18 | 21 | 19 | 22 | 16 | 12 | 9  | 14 | 17 | 24 | 25 | 20 | 27 | 21 |    |    |
| ENSP0000254846,ENSP000001,ENSG00000132541 | HSP121  | 2913 | 956 | 6   | 8         | 2.176305    | 0.0000000   | 0.1312859   | 0.9783277   | 0.9000832   | 14  | 1  | 0  | 0  | 0  | 0  | 0  | 0  | 0  | 0  | 0  | 0  | 0  | 0  | 0  | 0  | 0  | 0  | 0  | 0  | 0  | 0  | 0  | 0  | 0  | 0  | 0  | 0  | 0  | 0  | 0  |    |
| ENSP0000349685,ENSP000001,ENSG00000132549 | VPS13B  | 5676 | 1   | 29  | 75        | 0.0000000   | 0.0000000   | 0.4311658   | 0.4150183   | 0.902106    | 108 | 5  | 1  | 2  | 2  | 2  | 2  | 2  | 2  | 2  | 2  | 2  | 2  | 2  | 2  | 2  | 2  | 2  | 2  | 2  | 2  | 2  | 2  | 2  | 2  | 2  | 2  | 2  | 2  | 2  | 2  |    |
| ENSP0000378730,r376328,ENSG00000132549    | FLJ12   | 5576 | 1   | 33  | 75        | 0.0001193   | 0.0001388   | -0.458102   | 0.2372985   | 0.5711716   | 105 | 5  | 3  | 3  | 3  | 3  | 3  | 3  | 3  | 3  | 3  | 3  | 3  | 3  | 3  | 3  | 3  | 3  | 3  | 3  | 3  | 3  | 3  | 3  | 3  | 3  | 3  | 3  | 3  | 3  | 3  |    |
| ENSP0000378730,ENSP000001,ENSG00000132549 | FLJ12   | 5581 | 1   | 61  | 2         | 0.0000000   | 0.0000000   | 0.0000000   | 0.0000000   | 0.0000000   | 110 | 0  | 0  | 0  | 0  | 0  | 0  | 0  | 0  | 0  | 0  | 0  | 0  | 0  | 0  | 0  | 0  | 0  | 0  | 0  | 0  | 0  | 0  | 0  | 0  | 0  | 0  | 0  | 0  | 0  | 0  |    |
| ENSP0000254928,ENSG00000132591            | NR17    | 2930 | 1   | 16  | 24        | 5.788305    | 3.0625      | 0.1413609   | 0.7095396   | 0.8833909   | 47  | 4  | 1  | 2  | 0  | 0  | 0  | 0  | 0  | 0  | 0  | 0  | 0  | 0  | 0  | 0  | 0  | 0  | 0  | 0  | 0  | 0  | 0  | 0  | 0  | 0  | 0  | 0  | 0  | 0  | 0  |    |
| ENSP0000254940,ENSP000001,ENSG00000132603 | NR17    | 2177 | 1   | 3   | 14        | 1.088305    | 3.0625      | -1.496098   | 0.1294967   | 0.44576414  | 10  | 1  | 0  | 0  | 0  | 0  | 0  | 0  | 0  | 0  | 0  | 0  | 0  | 0  | 0  | 0  | 0  | 0  | 0  | 0  | 0  | 0  | 0  | 0  | 0  | 0  | 0  | 0  | 0  | 0  | 0  |    |
| ENSP0000254942,ENSG00000132604            | TRAF4   | 2397 | 1   | 25  | 35        | 0.046305    | 7.6505      | 0.2409576   | 0.4849952   | 0.7368778   | 60  | 0  | 2  | 1  | 3  | 3  | 1  | 3  | 1  | 3  | 1  | 2  | 2  | 0  | 2  | 3  | 3  | 3  | 1  | 1  |    |    |    |    |    |    |    |    |    |    |    |    |















| ENSP000027820,ENSP000001,ENSG00000146909  | NOM1      | 1135 | 1    | 27  | 46  | 9.76E-05   | 0.00010051 | -0.0423519 | 0.92896285 | 0.97523131 | 73   | 6  | 0  | 2  | 2  | 0  | 1  | 3  | 0                                                                                                                                                                                                                             | 0  | 6  | 2  | 5  | 1  | 1  | 0  | 0  | 3  | 3  | 3  | 1  | 2  | 4  | 4  | 0  | 0  | 1  | 7  | 5  | 6  |    |
|-------------------------------------------|-----------|------|------|-----|-----|------------|------------|------------|------------|------------|------|----|----|----|----|----|----|----|-------------------------------------------------------------------------------------------------------------------------------------------------------------------------------------------------------------------------------|----|----|----|----|----|----|----|----|----|----|----|----|----|----|----|----|----|----|----|----|----|----|
| ENSP000034867,ENSP000001,ENSG00000146918  | NCAP2     | 2055 | 259  | 10  | 25  | 3.62E-05   | 5.46E-05   | -0.5996055 | 0.3007924  | 0.69324285 | 35   | 4  | 0  | 0  | 2  | 0  | 0  | 2  | 0                                                                                                                                                                                                                             | 0  | 0  | 0  | 0  | 1  | 1  | 0  | 0  | 0  | 0  | 0  | 0  | 0  | 0  | 0  | 0  | 0  | 0  | 0  | 0  | 0  |    |
| ENSP000037049,ENSP000001,ENSG00000146922  | SHRDC2    | 2468 | 1    | 8   | 2   | 8.29E-05   | 0.00010051 | -0.0423519 | 0.92896285 | 0.97523131 | 73   | 6  | 0  | 2  | 2  | 0  | 1  | 3  | 0 <td>0</td> <td>6</td> <td>2</td> <td>5</td> <td>1</td> <td>1</td> <td>0</td> <td>0</td> <td>3</td> <td>3</td> <td>1</td> <td>2</td> <td>4</td> <td>4</td> <td>0</td> <td>0</td> <td>1</td> <td>7</td> <td>5</td> <td>6</td> | 0  | 6  | 2  | 5  | 1  | 1  | 0  | 0  | 3  | 3  | 1  | 2  | 4  | 4  | 0  | 0  | 1  | 7  | 5  | 6  |    |    |
| ENSP000034705,ENSP000001,ENSG00000146963  | LCU7C     | 1488 | 1    | 142 | 265 | 0.00051333 | 0.00057904 | -0.1737788 | 0.95311442 | 0.67705518 | 407  | 16 | 19 | 13 | 8  | 10 | 14 | 16 | 12                                                                                                                                                                                                                            | 13 | 8  | 10 | 14 | 16 | 12 | 13 | 8  | 10 | 14 | 16 | 12 | 13 | 8  | 10 | 14 | 16 | 12 | 13 | 8  | 10 | 14 |
| ENSP000036902,ENSP000001,ENSG00000147004  | SHK8P1    | 5402 | 1    | 42  | 53  | 0.00013883 | 0.00011581 | 0.39071956 | 0.46741639 | 0.75970606 | 95   | 2  | 2  | 1  | 3  | 1  | 4  | 6  | 7                                                                                                                                                                                                                             | 6  | 1  | 3  | 2  | 0  | 9  | 11 | 10 | 4  | 0  | 1  | 2  | 1  | 0  | 0  | 3  | 2  | 1  | 0  | 1  | 0  | 1  |
| ENSP000032727,ENSP000001,ENSG00000147044  | CAK       | 1607 | 1    | 44  | 53  | 0.00013883 | 0.00011581 | 0.39071956 | 0.46741639 | 0.75970606 | 95   | 2  | 2  | 1  | 3  | 1  | 4  | 6  | 7                                                                                                                                                                                                                             | 6  | 1  | 3  | 2  | 0  | 9  | 11 | 10 | 4  | 0  | 1  | 2  | 1  | 0  | 0  | 3  | 2  | 1  | 0  | 1  | 0  | 1  |
| ENSP000035348,ENSP000001,ENSG00000147054  | NSN       | 852  | 1    | 162 | 85  | 0.00013883 | 0.00011581 | 0.39071956 | 0.46741639 | 0.75970606 | 95   | 2  | 2  | 1  | 3  | 1  | 4  | 6  | 7                                                                                                                                                                                                                             | 6  | 1  | 3  | 2  | 0  | 9  | 11 | 10 | 4  | 0  | 1  | 2  | 1  | 0  | 0  | 3  | 2  | 1  | 0  | 1  | 0  | 1  |
| ENSP000027662,ENSP000001,ENSG00000147123  | NDUF81    | 1284 | 1    | 19  | 28  | 8.67E-05   | 6.12E-05   | 0.16689518 | 0.69549491 | 0.87740098 | 47   | 2  | 0  | 2  | 1  | 3  | 0  | 1  | 4                                                                                                                                                                                                                             | 5  | 1  | 0  | 1  | 0  | 3  | 3  | 1  | 2  | 1  | 1  | 2  | 1  | 0  | 2  | 2  | 3  | 2  | 4  | 1  | 1  |    |
| ENSP000032845,ENSP000001,ENSG00000147130  | ZMYX3     | 2171 | 1    | 24  | 19  | 8.68E-05   | 6.12E-05   | 0.16689518 | 0.69549491 | 0.87740098 | 47   | 2  | 0  | 2  | 1  | 3  | 0  | 1  | 4                                                                                                                                                                                                                             | 5  | 1  | 0  | 1  | 0  | 3  | 3  | 1  | 2  | 1  | 1  | 2  | 1  | 0  | 2  | 2  | 3  | 2  | 4  | 1  | 1  |    |
| ENSP000027679,ENSP000001,ENSG00000147140  | NDNO      | 1839 | 1    | 416 | 774 | 0.00150384 | 0.00191294 | -0.1694274 | 0.2673334  | 0.60684477 | 1190 | 55 | 24 | 30 | 26 | 40 | 26 | 8  | 32                                                                                                                                                                                                                            | 11 | 27 | 39 | 24 | 22 | 42 | 40 | 36 | 35 | 55 | 66 | 37 | 41 | 42 | 62 | 40 | 76 | 39 | 44 |    |    |    |
| ENSP000036285,ENSP000001,ENSG00000147164  | SNX12     | 4083 | 1    | 29  | 80  | 0.00014044 | 0.00012194 | 0.02149118 | 0.96051953 | 0.96051953 | 1190 | 55 | 24 | 30 | 26 | 40 | 26 | 8  | 32                                                                                                                                                                                                                            | 11 | 27 | 39 | 24 | 22 | 42 | 40 | 36 | 35 | 55 | 66 | 37 | 41 | 42 | 62 | 40 | 76 | 39 | 44 |    |    |    |
| ENSP000032148,ENSP000001,ENSG00000147202  | DIAPH2    | 1275 | 1    | 23  | 28  | 8.31E-05   | 6.12E-05   | 0.44252963 | 0.33488126 | 0.66662441 | 54   | 0  | 1  | 3  | 4  | 2  | 3  | 0  | 5                                                                                                                                                                                                                             | 3  | 0  | 0  | 0  | 2  | 1  | 0  | 2  | 1  | 4  | 1  | 3  | 2  | 0  | 1  | 0  | 3  | 3  | 0  | 3  | 0  |    |
| ENSP0000361496                            | PPR11L,PR | 1724 | 1    | 19  | 19  | 8.18E-05   | 4.15E-05   | -0.1996786 | 0.0597525  | 0.31409905 | 21   | 0  | 0  | 0  | 0  | 1  | 0  | 1  | 0                                                                                                                                                                                                                             | 1  | 0  | 0  | 0  | 0  | 0  | 0  | 0  | 0  | 0  | 0  | 0  | 0  | 0  | 0  | 0  | 0  | 0  | 0  | 0  | 0  |    |
| ENSP0000361512                            | PPR11L,PR | 1724 | 1    | 24  | 71  | 0.00015554 | 0.00015554 | -0.383442  | 0.0295464  | 0.20405766 | 14   | 0  | 0  | 0  | 0  | 0  | 0  | 0  | 0                                                                                                                                                                                                                             | 0  | 0  | 0  | 0  | 0  | 0  | 0  | 0  | 0  | 0  | 0  | 0  | 0  | 0  | 0  | 0  | 0  | 0  | 0  | 0  | 0  |    |
| ENSP0000359645                            | RBMX      | 3979 | 1    | 153 | 203 | 0.000551   | 0.0004573  | 0.3183452  | 0.1845579  | 0.52650703 | 356  | 11 | 6  | 9  | 15 | 16 | 7  | 18 | 14                                                                                                                                                                                                                            | 8  | 16 | 17 | 16 | 11 | 8  | 4  | 37 | 11 | 16 | 13 | 12 | 7  | 22 | 10 | 9  | 15 | 9  | 12 | 11 |    |    |
| ENSP0000359297                            | NSDLH     | 3098 | 1    | 58  | 85  | 0.00020967 | 0.00018573 | 0.17491265 | 0.4499266  | 0.74178337 | 143  | 8  | 3  | 15 | 16 | 5  | 4  | 7  | 6                                                                                                                                                                                                                             | 3  | 3  | 0  | 0  | 2  | 7  | 2  | 5  | 3  | 4  | 6  | 7  | 3  | 6  | 5  | 6  | 5  | 3  | 8  | 5  |    |    |
| ENSP0000359291,AZ7D                       | ZNF185    | 2195 | 1    | 22  | 23  | 7.95E-05   | 5.03E-05   | 0.06219225 | 0.3057691  | 0.64747433 | 45   | 2  | 0  | 0  | 0  | 1  | 0  | 1  | 0                                                                                                                                                                                                                             | 1  | 0  | 0  | 0  | 2  | 4  | 2  | 3  | 1  | 3  | 1  | 7  | 1  | 0  | 0  | 0  | 0  | 0  | 0  | 0  |    |    |
| ENSP0000359300                            | CETN2     | 6362 | 1351 | 12  | 18  | 4.34E-05   | 3.93E-05   | 0.14136009 | 0.7782445  | 0.91835016 | 30   | 1  | 1  | 1  | 0  | 0  | 1  | 1  | 3                                                                                                                                                                                                                             | 2  | 0  | 0  | 0  | 2  | 0  | 2  | 0  | 2  | 1  | 1  | 2  | 1  | 2  | 0  | 1  | 0  | 2  | 2  | 0  | 0  |    |
| ENSP000027630,ENSP000001,ENSG00000147416  | ATP6B1B2  | 566  | 1    | 65  | 94  | 0.00024388 | 0.00024388 | 0.19410155 | 0.2987045  | 0.63770676 | 159  | 8  | 6  | 7  | 8  | 7  | 4  | 2  | 3                                                                                                                                                                                                                             | 5  | 3  | 4  | 3  | 4  | 3  | 6  | 5  | 4  | 6  | 4  | 6  | 4  | 2  | 3  | 9  | 7  | 8  | 6  | 5  |    |    |
| ENSP0000348933,ENSP000001,ENSG00000147419 | CCDC25    | 2871 | 1    | 15  | 24  | 5.42E-05   | 5.46E-05   | -0.1018643 | 0.97934097 | 0.97934097 | 149  | 8  | 0  | 0  | 0  | 0  | 0  | 0  | 0                                                                                                                                                                                                                             | 0  | 0  | 0  | 0  | 1  | 2  | 3  | 2  | 1  | 1  | 1  | 1  | 0  | 0  | 0  | 0  | 0  | 0  | 0  | 0  | 0  |    |
| ENSP0000361516                            | ZNF185    | 2195 | 1    | 202 | 6   | 1.21E-05   | 0.00012194 | 0.02149118 | 0.96051953 | 0.96051953 | 1190 | 55 | 24 | 30 | 26 | 40 | 26 | 8  | 32                                                                                                                                                                                                                            | 11 | 27 | 39 | 24 | 22 | 42 | 40 | 36 | 35 | 55 | 66 | 37 | 41 | 42 | 62 | 40 | 76 | 39 | 44 |    |    |    |
| ENSP000032449,ENSP000001,ENSG00000147457  | CHMP7     | 5228 | 1    | 9   | 21  | 3.25E-05   | 4.59E-05   | 0.4906688  | 0.46717186 | 0.75970606 | 17   | 2  | 1  | 0  | 4  | 1  | 0  | 0  | 0                                                                                                                                                                                                                             | 0  | 0  | 0  | 0  | 0  | 0  | 1  | 0  | 0  | 0  | 0  | 0  | 0  | 0  | 0  | 0  | 0  | 0  | 0  | 0  | 0  | 0  |
| ENSP0000276440,ENSP000001,ENSG00000147459 | DZK3      | 2248 | 1    | 4   | 13  | 1.45E-05   | 2.84E-05   | 0.49741171 | 0.26309762 | 0.60365432 | 10   | 1  | 2  | 0  | 0  | 0  | 0  | 0  | 0                                                                                                                                                                                                                             | 0  | 0  | 0  | 0  | 1  | 2  | 1  | 4  | 2  | 1  | 0  | 0  | 0  | 0  | 0  | 0  | 0  | 0  | 0  | 0  | 0  | 0  |
| ENSP0000333551,ENSP000001,ENSG00000147471 | PRDC5     | 1585 | 373  | 13  | 42  | 7.07E-05   | 9.18E-05   | 0.9655551  | 0.06439599 | 0.32056688 | 95   | 2  | 1  | 3  | 1  | 0  | 2  | 0  | 0                                                                                                                                                                                                                             | 0  | 0  | 0  | 0  | 2  | 0  | 3  | 2  | 0  | 0  | 0  | 0  | 0  | 0  | 0  | 0  | 0  | 0  | 0  | 0  | 0  | 0  |
| ENSP0000276641                            | NSN       | 852  | 1    | 84  | 2   | 0.00013883 | 0.00011581 | 0.39071956 | 0.46741639 | 0.75970606 | 95   | 2  | 2  | 1  | 3  | 1  | 4  | 6  | 7                                                                                                                                                                                                                             | 6  | 1  | 3  | 2  | 0  | 9  | 11 | 10 | 4  | 0  | 1  | 2  | 1  | 0  | 0  | 3  | 2  | 1  | 0  | 1  | 0  | 1  |
| ENSP0000276487,ENSP000001,ENSG00000147527 | LYN       | 5275 | 1    | 30  | 68  | 0.00010485 | 0.00010485 | 0.4542497  | 0.17039717 | 0.55081288 | 88   | 4  | 4  | 1  | 4  | 5  | 2  | 3  | 1                                                                                                                                                                                                                             | 2  | 1  | 1  | 5  | 4  | 1  | 2  | 5  | 5  | 2  | 3  | 9  | 4  | 5  | 5  | 1  | 3  | 6  | 3  |    |    |    |
| ENSP0000321703,ENSP000001,ENSG00000147528 | TACC1     | 5251 | 1    | 42  | 70  | 0.00015183 | 0.00015183 | -0.01643   | 0.97851863 | 0.91919489 | 111  | 17 | 6  | 1  | 0  | 2  | 3  | 0  | 3                                                                                                                                                                                                                             | 4  | 3  | 2  | 5  | 6  | 1  | 1  | 0  | 5  | 7  | 3  | 8  | 6  | 7  | 0  | 0  | 2  | 4  | 2  | 4  |    |    |
| ENSP0000276530,ENSP000001,ENSG00000147533 | GOLGA7    | 4445 | 971  | 4   | 14  | 1.45E-05   | 3.06E-05   | -0.1081023 | 0.2167051  | 0.44868391 | 118  | 1  | 0  | 1  | 0  | 0  | 0  | 0  | 0                                                                                                                                                                                                                             | 0  | 0  | 0  | 0  | 1  | 0  | 1  | 1  | 0  | 0  | 0  | 0  | 0  | 0  | 0  | 0  | 0  | 0  | 0  | 0  | 0  |    |
| ENSP0000276530,ENSP000001,ENSG00000147533 | GOLGA7    | 4445 | 971  | 4   | 14  | 1.45E-05   | 3.06E-05   | -0.1081023 | 0.2167051  | 0.44868391 | 118  | 1  | 0  | 1  | 0  | 0  | 0  | 0  | 0                                                                                                                                                                                                                             | 0  | 0  | 0  | 0  | 1  | 0  | 1  | 1  | 0  | 0  | 0  | 0  | 0  | 0  | 0  | 0  | 0  | 0  | 0  | 0  | 0  |    |
| ENSP0000276533,ENSP000001,ENSG00000147536 | GN5A      | 3986 | 899  | 6   | 21  | 2.17E-05   | 4.59E-05   | -0.1081023 | 0.1013675  | 0.39455144 | 27   | 2  | 2  | 0  | 1  | 0  | 0  | 0  | 0                                                                                                                                                                                                                             | 0  | 0  | 0  | 0  | 0  | 2  | 2  | 0  | 2  | 1  | 3  | 0  | 0  | 0  | 0  | 0  | 0  | 0  | 0  | 0  | 0  |    |
| ENSP0000313983                            | WHSCL11   | 6399 | 1    | 1   | 16  | 3.26E-06   | 5.03E-05   | -0.3277604 | 0.0222291  | 0.0579113  | 17   | 0  | 0  | 0  | 0  | 0  | 0  | 0  | 0                                                                                                                                                                                                                             | 0  | 0  | 0  | 0  | 1  | 0  | 0  | 0  | 0  | 0  | 0  | 0  | 0  | 0  | 0  | 0  | 0  | 0  | 0  | 0  | 0  |    |
| ENSP0000276585,ENSP000001,ENSG00000147586 | MHP28     | 4957 | 1074 | 18  | 25  | 6.51E-05   | 5.46E-05   | 0.252194   | 0.32921    | 0.65263206 | 41   | 1  | 3  | 1  | 3  | 2  | 1  | 3  | 2                                                                                                                                                                                                                             | 2  | 2  | 2  | 2  | 1  | 3  | 2  | 1  | 3  | 2  | 1  | 2  | 1  | 2  | 2  | 2  | 2  | 2  | 2  | 2  | 2  |    |
| ENSP0000276591                            | NSN       | 852  | 1    | 108 | 20  | 5.90E-05   | 0.00012194 | 0.02149118 | 0.96051953 | 0.96051953 | 1190 | 55 | 24 | 30 | 26 | 40 | 26 | 8  | 32                                                                                                                                                                                                                            | 11 | 27 | 39 | 24 | 22 | 42 | 40 | 36 | 35 | 55 | 66 | 37 | 41 | 42 | 62 | 40 | 76 |    |    |    |    |    |



















|                                          |         |      |   |     |     |            |            |            |            |            |     |    |    |    |    |    |    |    |    |    |    |    |    |    |    |    |    |    |    |    |    |    |    |    |    |    |    |    |    |    |    |
|------------------------------------------|---------|------|---|-----|-----|------------|------------|------------|------------|------------|-----|----|----|----|----|----|----|----|----|----|----|----|----|----|----|----|----|----|----|----|----|----|----|----|----|----|----|----|----|----|----|
| ENSP000035571,ENSP000003,ENSG00000168275 | C1orf11 | 572  | 1 | 28  | 47  | 0.00010122 | 0.00010027 | -0.0209113 | 0.95962646 | 0.98271232 | 75  | 2  | 2  | 0  | 3  | 1  | 3  | 2  | 2  | 2  | 5  | 4  | 1  | 3  | 1  | 3  | 2  | 1  | 2  | 2  | 1  | 3  | 5  | 2  | 3  | 5  | 1  | 5  | 6  | 3  |    |
| ENSP000037241,ENSP000003,ENSG00000168291 | P0HB    | 525  | 1 | 143 | 249 | 0.00051095 | 0.00004482 | -0.177880  | 0.67546442 | 0.86996411 | 392 | 20 | 12 | 18 | 6  | 8  | 14 | 8  | 16 | 5  | 23 | 8  | 12 | 6  | 5  | 10 | 10 | 18 | 10 | 12 | 15 | 11 | 16 | 12 | 17 | 23 | 24 | 16 | 19 | 13 | 14 |
| ENSP000038712,ENSP000003,ENSG00000168307 | CFCD    | 578  | 1 | 7   | 5   | 2.514207   | 0.00000000 | 0.00000000 | 0.00000000 | 0.00000000 | 104 | 0  | 0  | 0  | 0  | 0  | 0  | 0  | 0  | 0  | 0  | 0  | 0  | 0  | 0  | 0  | 0  | 0  | 0  | 0  | 0  | 0  | 0  | 0  | 0  | 0  | 0  | 0  | 0  |    |    |
| ENSP000039010,ENSP000003,ENSG00000168374 | ARF4    | 4919 | 1 | 163 | 280 | 0.00059295 | 0.00001182 | -0.0542323 | 0.78470448 | 0.92139844 | 443 | 30 | 9  | 18 | 13 | 19 | 15 | 16 | 5  | 10 | 21 | 0  | 7  | 14 | 5  | 16 | 16 | 11 | 16 | 20 | 16 | 12 | 15 | 9  | 25 | 16 | 25 | 12 | 11 |    |    |
| ENSP000039425,ENSP000003,ENSG00000168385 | SEPT2   | 3478 | 1 | 101 | 167 | 0.00008512 | 0.00003691 | 0.22882225 | 0.99662399 | 0.99596811 | 268 | 16 | 9  | 6  | 7  | 11 | 5  | 12 | 10 | 7  | 9  | 4  | 5  | 8  | 5  | 9  | 12 | 9  | 7  | 10 | 11 | 6  | 14 | 8  | 6  | 12 | 10 | 14 | 9  |    |    |
| ENSP000039780,ENSP000003,ENSG00000168386 | FUPL1   | 9453 | 1 | 12  | 17  | 4.846355   | 3.71e-05   | 0.00029225 | 0.55519188 | 0.81404616 | 29  | 3  | 1  | 0  | 0  | 0  | 0  | 0  | 0  | 0  | 0  | 0  | 0  | 2  | 0  | 0  | 0  | 0  | 2  | 1  | 1  | 1  | 1  | 1  | 0  | 1  | 0  | 1  | 0  |    |    |
| ENSP000039544,ENSP000003,ENSG00000168387 | COG7    | 1517 | 1 | 36  | 17  | 6.062155   | 3.77e-05   | 0.44621442 | 0.92773232 | 0.92773232 | 104 | 0  | 0  | 0  | 0  | 0  | 0  | 0  | 0  | 0  | 0  | 0  | 0  | 0  | 0  | 0  | 0  | 0  | 0  | 0  | 0  | 0  | 0  | 0  | 0  | 0  | 0  | 0  | 0  |    |    |
| ENSP000039544,ENSP000003,ENSG00000168343 | COG7    | 1516 | 1 | 356 | 18  | 0.611505   | 4.37E-05   | 0.5741955  | 0.25012267 | 0.59059874 | 38  | 0  | 0  | 0  | 0  | 2  | 3  | 4  | 1  | 3  | 0  | 1  | 2  | 0  | 0  | 2  | 2  | 1  | 1  | 1  | 1  | 1  | 0  | 1  | 0  | 2  | 2  | 1  | 0  | 0  |    |
| ENSP000039370,ENSP000003,ENSG00000168338 | COC40   | 4252 | 1 | 27  | 57  | 9.746e-05  | 0.00012455 | -0.3516799 | 0.36438873 | 0.68846346 | 84  | 6  | 1  | 3  | 3  | 1  | 5  | 0  | 3  | 1  | 0  | 3  | 1  | 4  | 5  | 2  | 1  | 2  | 1  | 0  | 2  | 1  | 0  | 2  | 3  | 2  | 2  | 3  | 1  | 2  |    |
| ENSP000039146,ENSP000003,ENSG00000168349 | STYF1   | 4817 | 1 | 294 | 60  | 0.00106281 | 0.00139844 | -0.3993812 | 0.0181688  | 0.17225858 | 914 | 30 | 17 | 24 | 25 | 23 | 25 | 19 | 29 | 28 | 15 | 22 | 16 | 22 | 16 | 27 | 36 | 25 | 39 | 32 | 31 | 21 | 22 | 19 | 55 | 21 | 55 | 58 |    |    |    |
| ENSP000039146,ENSP000003,ENSG00000168349 | STYF1   | 4817 | 1 | 294 | 60  | 0.00106281 | 0.00139844 | -0.3993812 | 0.0181688  | 0.17225858 | 914 | 30 | 17 | 24 | 25 | 23 | 25 | 19 | 29 | 28 | 15 | 22 | 16 | 22 | 16 | 27 | 36 | 25 | 39 | 32 | 31 | 21 | 22 | 19 | 55 | 21 | 55 | 58 |    |    |    |
| ENSP000039146,ENSP000003,ENSG00000168349 | STYF1   | 4817 | 1 | 294 | 60  | 0.00106281 | 0.00139844 | -0.3993812 | 0.0181688  | 0.17225858 | 914 | 30 | 17 | 24 | 25 | 23 | 25 | 19 | 29 | 28 | 15 | 22 | 16 | 22 | 16 | 27 | 36 | 25 | 39 | 32 | 31 | 21 | 22 | 19 | 55 | 21 | 55 | 58 |    |    |    |
| ENSP000039146,ENSP000003,ENSG00000168349 | STYF1   | 4817 | 1 | 294 | 60  | 0.00106281 | 0.00139844 | -0.3993812 | 0.0181688  | 0.17225858 | 914 | 30 | 17 | 24 | 25 | 23 | 25 | 19 | 29 | 28 | 15 | 22 | 16 | 22 | 16 | 27 | 36 | 25 | 39 | 32 | 31 | 21 | 22 | 19 | 55 | 21 | 55 | 58 |    |    |    |
| ENSP000039146,ENSP000003,ENSG00000168349 | STYF1   | 4817 | 1 | 294 | 60  | 0.00106281 | 0.00139844 | -0.3993812 | 0.0181688  | 0.17225858 | 914 | 30 | 17 | 24 | 25 | 23 | 25 | 19 | 29 | 28 | 15 | 22 | 16 | 22 | 16 | 27 | 36 | 25 | 39 | 32 | 31 | 21 | 22 | 19 | 55 | 21 | 55 | 58 |    |    |    |
| ENSP000039146,ENSP000003,ENSG00000168349 | STYF1   | 4817 | 1 | 294 | 60  | 0.00106281 | 0.00139844 | -0.3993812 | 0.0181688  | 0.17225858 | 914 | 30 | 17 | 24 | 25 | 23 | 25 | 19 | 29 | 28 | 15 | 22 | 16 | 22 | 16 | 27 | 36 | 25 | 39 | 32 | 31 | 21 | 22 | 19 | 55 | 21 | 55 | 58 |    |    |    |
| ENSP000039146,ENSP000003,ENSG00000168349 | STYF1   | 4817 | 1 | 294 | 60  | 0.00106281 | 0.00139844 | -0.3993812 | 0.0181688  | 0.17225858 | 914 | 30 | 17 | 24 | 25 | 23 | 25 | 19 | 29 | 28 | 15 | 22 | 16 | 22 | 16 | 27 | 36 | 25 | 39 | 32 | 31 | 21 | 22 | 19 | 55 | 21 | 55 | 58 |    |    |    |
| ENSP000039146,ENSP000003,ENSG00000168349 | STYF1   | 4817 | 1 | 294 | 60  | 0.00106281 | 0.00139844 | -0.3993812 | 0.0181688  | 0.17225858 | 914 | 30 | 17 | 24 | 25 | 23 | 25 | 19 | 29 | 28 | 15 | 22 | 16 | 22 | 16 | 27 | 36 | 25 | 39 | 32 | 31 | 21 | 22 | 19 | 55 | 21 | 55 | 58 |    |    |    |
| ENSP000039146,ENSP000003,ENSG00000168349 | STYF1   | 4817 | 1 | 294 | 60  | 0.00106281 | 0.00139844 | -0.3993812 | 0.0181688  | 0.17225858 | 914 | 30 | 17 | 24 | 25 | 23 | 25 | 19 | 29 | 28 | 15 | 22 | 16 | 22 | 16 | 27 | 36 | 25 | 39 | 32 | 31 | 21 | 22 | 19 | 55 | 21 | 55 | 58 |    |    |    |
| ENSP000039146,ENSP000003,ENSG00000168349 | STYF1   | 4817 | 1 | 294 | 60  | 0.00106281 | 0.00139844 | -0.3993812 | 0.0181688  | 0.17225858 | 914 | 30 | 17 | 24 | 25 | 23 | 25 | 19 | 29 | 28 | 15 | 22 | 16 | 22 | 16 | 27 | 36 | 25 | 39 | 32 | 31 | 21 | 22 | 19 | 55 | 21 | 55 | 58 |    |    |    |
| ENSP000039146,ENSP000003,ENSG00000168349 | STYF1   | 4817 | 1 | 294 | 60  | 0.00106281 | 0.00139844 | -0.3993812 | 0.0181688  | 0.17225858 | 914 | 30 | 17 | 24 | 25 | 23 | 25 | 19 | 29 | 28 | 15 | 22 | 16 | 22 | 16 | 27 | 36 | 25 | 39 | 32 | 31 | 21 | 22 | 19 | 55 | 21 | 55 | 58 |    |    |    |
| ENSP000039146,ENSP000003,ENSG00000168349 | STYF1   | 4817 | 1 | 294 | 60  | 0.00106281 | 0.00139844 | -0.3993812 | 0.0181688  | 0.17225858 | 914 | 30 | 17 | 24 | 25 | 23 | 25 | 19 | 29 | 28 | 15 | 22 | 16 | 22 | 16 | 27 | 36 | 25 | 39 | 32 | 31 | 21 | 22 | 19 | 55 | 21 | 55 | 58 |    |    |    |
| ENSP000039146,ENSP000003,ENSG00000168349 | STYF1   | 4817 | 1 | 294 | 60  | 0.00106281 | 0.00139844 | -0.3993812 | 0.0181688  | 0.17225858 | 914 | 30 | 17 | 24 | 25 | 23 | 25 | 19 | 29 | 28 | 15 | 22 | 16 | 22 | 16 | 27 | 36 | 25 | 39 | 32 | 31 | 21 | 22 | 19 | 55 | 21 | 55 | 58 |    |    |    |
| ENSP000039146,ENSP000003,ENSG00000168349 | STYF1   | 4817 | 1 | 294 | 60  | 0.00106281 | 0.00139844 | -0.3993812 | 0.0181688  | 0.17225858 | 914 | 30 | 17 | 24 | 25 | 23 | 25 | 19 | 29 | 28 | 15 | 22 | 16 | 22 | 16 | 27 | 36 | 25 | 39 | 32 | 31 | 21 | 22 | 19 | 55 | 21 | 55 | 58 |    |    |    |
| ENSP000039146,ENSP000003,ENSG00000168349 | STYF1   | 4817 | 1 | 294 | 60  | 0.00106281 | 0.00139844 | -0.3993812 | 0.0181688  | 0.17225858 | 914 | 30 | 17 | 24 | 25 | 23 | 25 | 19 | 29 | 28 | 15 | 22 | 16 | 22 | 16 | 27 | 36 | 25 | 39 | 32 | 31 | 21 | 22 | 19 | 55 | 21 | 55 | 58 |    |    |    |
| ENSP000039146,ENSP000003,ENSG00000168349 | STYF1   | 4817 | 1 | 294 | 60  | 0.00106281 | 0.00139844 | -0.3993812 | 0.0181688  | 0.17225858 | 914 | 30 | 17 | 24 | 25 | 23 | 25 | 19 | 29 | 28 | 15 | 22 | 16 | 22 | 16 | 27 | 36 | 25 | 39 | 32 | 31 | 21 | 22 | 19 | 55 | 21 | 55 | 58 |    |    |    |
| ENSP000039146,ENSP000003,ENSG00000168349 | STYF1   | 4817 | 1 | 294 | 60  | 0.00106281 | 0.00139844 | -0.3993812 | 0.0181688  | 0.17225858 | 914 | 30 | 17 | 24 | 25 | 23 | 25 | 19 | 29 | 28 | 15 | 22 | 16 | 22 | 16 | 27 | 36 | 25 | 39 | 32 | 31 | 21 | 22 | 19 | 55 | 21 | 55 | 58 |    |    |    |
| ENSP000039146,ENSP000003,ENSG00000168349 | STYF1   | 4817 | 1 | 294 | 60  | 0.00106281 | 0.00139844 | -0.3993812 | 0.0181688  | 0.17225858 | 914 | 30 | 17 | 24 | 25 | 23 | 25 | 19 | 29 | 28 | 15 | 22 | 16 | 22 | 16 | 27 | 36 | 25 | 39 | 32 | 31 | 21 | 22 | 19 | 55 | 21 | 55 | 58 |    |    |    |
| ENSP000039146,ENSP000003,ENSG00000168349 | STYF1   | 4817 | 1 | 294 | 60  | 0.00106281 | 0.00139844 | -0.3993812 | 0.0181688  | 0.17225858 | 914 | 30 | 17 | 24 | 25 | 23 | 25 | 19 | 29 | 28 | 15 | 22 | 16 | 22 | 16 | 27 | 36 | 25 | 39 | 32 | 31 | 21 | 22 | 19 | 55 | 21 | 55 | 58 |    |    |    |
| ENSP000039146,ENSP000003,ENSG00000168349 | STYF1   | 4817 | 1 | 294 | 60  | 0.00106281 | 0.00139844 | -0.3993812 | 0.0181688  | 0.17225858 | 914 | 30 | 17 | 24 | 25 | 23 | 25 | 19 | 29 | 28 | 15 | 22 | 16 | 22 | 16 | 27 | 36 | 25 | 39 | 32 | 31 | 21 | 22 | 19 | 55 | 21 | 55 | 58 |    |    |    |
| ENSP000039146,ENSP000003,ENSG00000168349 | STYF1   | 4817 | 1 | 294 | 60  | 0.00106281 | 0.00139844 | -0.3993812 | 0.0181688  | 0.17225858 | 914 | 30 | 17 | 24 | 25 | 23 | 25 | 19 | 29 | 28 | 15 | 22 | 16 | 22 | 16 | 27 | 36 | 25 | 39 | 32 | 31 | 21 | 22 | 19 | 55 | 21 | 55 | 58 |    |    |    |
| ENSP000039146,ENSP000003,ENSG00000168349 | STYF1   | 4817 | 1 | 294 | 60  | 0.00106281 | 0.00139844 | -0.3993812 | 0.0181688  | 0.17225858 | 914 | 30 | 17 | 24 | 25 | 23 | 25 | 19 | 29 | 28 | 15 | 22 | 16 | 22 | 16 | 27 | 36 | 25 | 39 | 32 | 31 | 21 | 22 | 19 | 55 | 21 | 55 | 58 |    |    |    |
| ENSP000039146,ENSP000003,ENSG00000168349 | STYF1   | 4817 | 1 | 294 | 60  | 0.00106281 | 0.00139844 | -0.3993812 | 0.0181688  | 0.17225858 | 914 | 30 | 17 | 24 | 25 | 23 | 25 | 19 | 29 | 28 | 15 | 22 | 16 | 22 | 16 | 27 | 36 | 25 | 39 | 32 | 31 | 21 | 22 | 19 | 55 | 21 | 55 | 58 |    |    |    |
| ENSP000039146,ENSP000003,ENSG00000168349 | STYF1   | 4817 | 1 | 294 | 60  | 0.00106281 | 0.00139844 | -0.3993812 | 0.0181688  | 0.17225858 | 914 | 30 | 17 | 24 | 25 | 23 | 25 | 19 | 29 | 28 | 15 | 22 | 16 | 22 | 16 | 27 | 36 | 25 | 39 | 32 | 31 | 21 | 22 | 19 | 55 | 21 | 55 | 58 |    |    |    |
| ENSP000039146,ENSP000003,ENSG00000168349 | STYF1   | 4817 | 1 | 294 | 60  | 0.00106281 | 0.00139844 | -0.3993812 | 0.0181688  | 0.17225858 | 914 | 30 | 17 | 24 | 25 | 23 | 25 | 19 | 29 | 28 | 15 | 22 | 16 | 22 | 16 | 27 | 36 | 25 | 39 | 32 | 31 | 21 | 22 | 19 | 55 | 21 | 55 | 58 |    |    |    |
| ENSP000039146,ENSP000003,ENSG00000168349 | STYF1   | 4817 | 1 | 294 | 60  | 0.00106281 | 0.00139844 | -0.3993812 | 0.0181688  | 0.17225858 | 914 | 30 | 17 | 24 | 25 | 23 | 25 | 19 | 29 | 28 | 15 | 22 | 16 | 22 | 16 | 27 | 36 | 25 | 39 | 32 | 31 | 21 | 22 | 19 | 55 | 21 | 55 | 58 |    |    |    |
| ENSP000039146,ENSP000003,ENSG00000168349 | STYF1   | 4817 | 1 | 294 | 60  | 0.00106281 | 0.00139844 | -0.3993812 | 0.0181688  | 0.17225858 | 914 |    |    |    |    |    |    |    |    |    |    |    |    |    |    |    |    |    |    |    |    |    |    |    |    |    |    |    |    |    |    |









|                |                 |        |      |      |    |    |           |           |            |           |           |      |   |   |   |   |   |   |   |   |   |   |   |   |   |   |   |   |   |   |   |   |   |   |   |   |   |   |   |   |   |   |   |   |
|----------------|-----------------|--------|------|------|----|----|-----------|-----------|------------|-----------|-----------|------|---|---|---|---|---|---|---|---|---|---|---|---|---|---|---|---|---|---|---|---|---|---|---|---|---|---|---|---|---|---|---|---|
| ENSP0000332198 | ENSG00000182117 | NP010  | 4000 | 1    | 19 | 51 | 6.87E-05  | 0.0001144 | -0.6981752 | 0.0211629 | 0.1857253 | 70   | 2 | 1 | 1 | 1 | 3 | 1 | 1 | 1 | 1 | 2 | 1 | 4 | 2 | 3 | 2 | 2 | 5 | 1 | 3 | 4 | 1 | 3 | 2 | 3 | 3 | 5 | 2 | 5 | 4 | 1 | 1 |   |
| ENSP0000335712 | ENSG00000182134 | TRKH1  | 4003 | 1    | 6  | 9  | 1.76E-05  | 1.97E-05  | 0.4112009  | 0.8246299 | 0.9430083 | 15   | 1 | 0 | 1 | 0 | 0 | 0 | 0 | 0 | 0 | 0 | 1 | 1 | 1 | 0 | 2 | 1 | 0 | 1 | 0 | 0 | 1 | 1 | 0 | 1 | 1 | 0 | 1 | 0 | 1 | 0 | 1 | 1 |
| ENSP0000336048 | ENSG00000182154 | MRP1A1 | 4007 | 1    | 16 | 2  | 2.17E-05  | 0.28E-05  | 0.3891546  | 0.0000000 | 0.0000000 | 16   | 2 | 1 | 1 | 0 | 0 | 0 | 0 | 0 | 0 | 0 | 0 | 0 | 0 | 0 | 0 | 0 | 0 | 0 | 0 | 0 | 0 | 0 | 0 | 0 | 0 | 0 | 0 | 0 | 0 | 0 | 0 |   |
| ENSP0000336048 | ENSG00000182154 | MRP1A1 | 4003 | 1345 | 16 | 1  | 5.78E-05  | 8.96E-05  | 0.6132600  | 0.0749818 | 0.3490576 | 18   | 1 | 1 | 0 | 2 | 2 | 1 | 3 | 2 | 3 | 0 | 0 | 0 | 1 | 1 | 2 | 2 | 2 | 3 | 3 | 3 | 3 | 3 | 3 | 3 | 3 | 3 | 3 | 3 | 3 | 3 | 3 | 3 |
| ENSP0000337487 | ENSG00000182173 | TSEN54 | 4676 | 1013 | 1  | 12 | 3.66E-05  | 2.62E-05  | -2.8586399 | 0.0261652 | 0.205451  | 13   | 1 | 0 | 0 | 0 | 0 | 0 | 0 | 0 | 0 | 0 | 0 | 0 | 0 | 0 | 0 | 0 | 0 | 0 | 0 | 0 | 0 | 0 | 0 | 0 | 0 | 0 | 0 | 0 | 0 | 0 | 0 |   |
| ENSP0000338140 | ENSG00000182247 | UBE2T2 | 781  | 1    | 10 | 8  | 3.62E-05  | 1.75E-05  | 1.0482568  | 0.0815337 | 0.4849118 | 18   | 2 | 3 | 1 | 0 | 0 | 0 | 0 | 0 | 0 | 0 | 0 | 0 | 0 | 0 | 0 | 0 | 0 | 0 | 0 | 0 | 0 | 0 | 0 | 0 | 0 | 0 | 0 | 0 | 0 | 0 | 0 |   |
| ENSP0000338140 | ENSG00000182247 | UBE2T2 | 781  | 41   | 16 | 5  | 2.48E-05  | 5.64E-05  | 0.0884664  | 0.0710331 | 0.9621873 | 41   | 5 | 5 | 0 | 1 | 0 | 0 | 0 | 0 | 0 | 0 | 0 | 0 | 0 | 0 | 0 | 0 | 0 | 0 | 0 | 0 | 0 | 0 | 0 | 0 | 0 | 0 | 0 | 0 | 0 | 0 | 0 |   |
| ENSP0000338181 | ENSG00000182307 | Cbr3f3 | 794  | 192  | 1  | 11 | 3.62E-05  | 2.46E-05  | -2.73109   | 0.0242023 | 0.2005808 | 12   | 0 | 1 | 0 | 0 | 0 | 0 | 0 | 0 | 0 | 0 | 0 | 0 | 0 | 0 | 0 | 0 | 0 | 0 | 0 | 0 | 0 | 0 | 0 | 0 | 0 | 0 | 0 | 0 | 0 | 0 |   |   |
| ENSP0000338294 | ENSG00000182317 | SMRT2  | 1808 | 1    | 1  | 4  | 1.45E-05  | 0.0000000 | 0.0000000  | 0.0000000 | 0.0000000 | 1808 | 1 | 1 | 0 | 0 | 0 | 0 | 0 | 0 | 0 | 0 | 0 | 0 | 0 | 0 | 0 | 0 | 0 | 0 | 0 | 0 | 0 | 0 | 0 | 0 | 0 | 0 | 0 | 0 | 0 | 0 |   |   |
| ENSP0000338340 | ENSG00000182446 | NFLOC4 | 367  | 1    | 4  | 81 | 0.0002502 | 0.0001799 | 0.3172099  | 0.1303637 | 0.0447826 | 142  | 7 | 5 | 6 | 0 | 6 | 3 | 7 | 8 | 6 | 1 | 4 | 3 | 3 | 5 | 6 | 7 | 3 | 4 | 4 | 2 | 2 | 4 | 5 | 5 | 8 | 7 | 5 | 7 |   |   |   |   |
| ENSP0000338340 | ENSG00000182446 | NFLOC4 | 367  | 1    | 69 | 90 | 0.0004944 | 0.0001966 | 0.3429935  | 0.0960305 | 0.3860763 | 159  | 8 | 5 | 7 | 5 | 8 | 4 | 7 | 8 | 6 | 2 | 1 | 3 | 3 | 6 | 7 | 8 | 2 | 5 | 4 | 3 | 2 | 4 | 5 | 5 | 5 | 9 | 6 | 8 | 8 |   |   |   |
| ENSP0000338380 | ENSG00000182473 | EXOC7  | 386  | 1    | 5  | 5  | 5.04E-05  | 0.0001799 | 0.3487087  | 0.3654028 | 0.6889964 | 79   | 3 | 1 | 4 | 2 | 2 | 3 | 1 | 2 | 0 | 0 | 0 | 0 | 0 | 0 | 0 | 0 | 0 | 0 | 0 | 0 | 0 | 0 | 0 | 0 | 0 | 0 | 0 | 0 | 0 | 0 |   |   |
| ENSP0000338570 | ENSG00000182534 | GURS   | 823  | 3    | 23 | 4  | 0.0001193 | 0.0001979 | 0.4502100  | 0.0402100 | 0.9804573 | 87   | 4 | 1 | 2 | 1 | 2 | 1 | 2 | 2 | 5 | 3 | 1 | 3 | 3 | 2 | 1 | 2 | 1 | 2 | 1 | 2 | 1 | 2 | 1 | 2 | 1 | 2 | 1 | 2 | 1 | 2 |   |   |
| ENSP0000338570 | ENSG00000182534 | GURS   | 823  | 3    | 23 | 4  | 0.0001193 | 0.0001979 | 0.4502100  | 0.0402100 | 0.9804573 | 87   | 4 | 1 | 2 | 1 | 2 | 1 | 2 | 2 | 5 | 3 | 1 | 3 | 3 | 2 | 1 | 2 | 1 | 2 | 1 | 2 | 1 | 2 | 1 | 2 | 1 | 2 | 1 | 2 | 1 | 2 |   |   |
| ENSP0000338570 | ENSG00000182534 | GURS   | 823  | 3    | 23 | 4  | 0.0001193 | 0.0001979 | 0.4502100  | 0.0402100 | 0.9804573 | 87   | 4 | 1 | 2 | 1 | 2 | 1 | 2 | 2 | 5 | 3 | 1 | 3 | 3 | 2 | 1 | 2 | 1 | 2 | 1 | 2 | 1 | 2 | 1 | 2 | 1 | 2 | 1 | 2 | 1 | 2 |   |   |
| ENSP0000338570 | ENSG00000182534 | GURS   | 823  | 3    | 23 | 4  | 0.0001193 | 0.0001979 | 0.4502100  | 0.0402100 | 0.9804573 | 87   | 4 | 1 | 2 | 1 | 2 | 1 | 2 | 2 | 5 | 3 | 1 | 3 | 3 | 2 | 1 | 2 | 1 | 2 | 1 | 2 | 1 | 2 | 1 | 2 | 1 | 2 | 1 | 2 | 1 | 2 |   |   |
| ENSP0000338570 | ENSG00000182534 | GURS   | 823  | 3    | 23 | 4  | 0.0001193 | 0.0001979 | 0.4502100  | 0.0402100 | 0.9804573 | 87   | 4 | 1 | 2 | 1 | 2 | 1 | 2 | 2 | 5 | 3 | 1 | 3 | 3 | 2 | 1 | 2 | 1 | 2 | 1 | 2 | 1 | 2 | 1 | 2 | 1 | 2 | 1 | 2 | 1 | 2 |   |   |
| ENSP0000338570 | ENSG00000182534 | GURS   | 823  | 3    | 23 | 4  | 0.0001193 | 0.0001979 | 0.4502100  | 0.0402100 | 0.9804573 | 87   | 4 | 1 | 2 | 1 | 2 | 1 | 2 | 2 | 5 | 3 | 1 | 3 | 3 | 2 | 1 | 2 | 1 | 2 | 1 | 2 | 1 | 2 | 1 | 2 | 1 | 2 | 1 | 2 | 1 | 2 |   |   |
| ENSP0000338570 | ENSG00000182534 | GURS   | 823  | 3    | 23 | 4  | 0.0001193 | 0.0001979 | 0.4502100  | 0.0402100 | 0.9804573 | 87   | 4 | 1 | 2 | 1 | 2 | 1 | 2 | 2 | 5 | 3 | 1 | 3 | 3 | 2 | 1 | 2 | 1 | 2 | 1 | 2 | 1 | 2 | 1 | 2 | 1 | 2 | 1 | 2 | 1 | 2 |   |   |
| ENSP0000338570 | ENSG00000182534 | GURS   | 823  | 3    | 23 | 4  | 0.0001193 | 0.0001979 | 0.4502100  | 0.0402100 | 0.9804573 | 87   | 4 | 1 | 2 | 1 | 2 | 1 | 2 | 2 | 5 | 3 | 1 | 3 | 3 | 2 | 1 | 2 | 1 | 2 | 1 | 2 | 1 | 2 | 1 | 2 | 1 | 2 | 1 | 2 | 1 | 2 |   |   |
| ENSP0000338570 | ENSG00000182534 | GURS   | 823  | 3    | 23 | 4  | 0.0001193 | 0.0001979 | 0.4502100  | 0.0402100 | 0.9804573 | 87   | 4 | 1 | 2 | 1 | 2 | 1 | 2 | 2 | 5 | 3 | 1 | 3 | 3 | 2 | 1 | 2 | 1 | 2 | 1 | 2 | 1 | 2 | 1 | 2 | 1 | 2 | 1 | 2 | 1 | 2 |   |   |
| ENSP0000338570 | ENSG00000182534 | GURS   | 823  | 3    | 23 | 4  | 0.0001193 | 0.0001979 | 0.4502100  | 0.0402100 | 0.9804573 | 87   | 4 | 1 | 2 | 1 | 2 | 1 | 2 | 2 | 5 | 3 | 1 | 3 | 3 | 2 | 1 | 2 | 1 | 2 | 1 | 2 | 1 | 2 | 1 | 2 | 1 | 2 | 1 | 2 | 1 | 2 |   |   |
| ENSP0000338570 | ENSG00000182534 | GURS   | 823  | 3    | 23 | 4  | 0.0001193 | 0.0001979 | 0.4502100  | 0.0402100 | 0.9804573 | 87   | 4 | 1 | 2 | 1 | 2 | 1 | 2 | 2 | 5 | 3 | 1 | 3 | 3 | 2 | 1 | 2 | 1 | 2 | 1 | 2 | 1 | 2 | 1 | 2 | 1 | 2 | 1 | 2 | 1 | 2 |   |   |
| ENSP0000338570 | ENSG00000182534 | GURS   | 823  | 3    | 23 | 4  | 0.0001193 | 0.0001979 | 0.4502100  | 0.0402100 | 0.9804573 | 87   | 4 | 1 | 2 | 1 | 2 | 1 | 2 | 2 | 5 | 3 | 1 | 3 | 3 | 2 | 1 | 2 | 1 | 2 | 1 | 2 | 1 | 2 | 1 | 2 | 1 | 2 | 1 | 2 | 1 | 2 |   |   |
| ENSP0000338570 | ENSG00000182534 | GURS   | 823  | 3    | 23 | 4  | 0.0001193 | 0.0001979 | 0.4502100  | 0.0402100 | 0.9804573 | 87   | 4 | 1 | 2 | 1 | 2 | 1 | 2 | 2 | 5 | 3 | 1 | 3 | 3 | 2 | 1 | 2 | 1 | 2 | 1 | 2 | 1 | 2 | 1 | 2 | 1 | 2 | 1 | 2 | 1 | 2 |   |   |
| ENSP0000338570 | ENSG00000182534 | GURS   | 823  | 3    | 23 | 4  | 0.0001193 | 0.0001979 | 0.4502100  | 0.0402100 | 0.9804573 | 87   | 4 | 1 | 2 | 1 | 2 | 1 | 2 | 2 | 5 | 3 | 1 | 3 | 3 | 2 | 1 | 2 | 1 | 2 | 1 | 2 | 1 | 2 | 1 | 2 | 1 | 2 | 1 | 2 | 1 | 2 |   |   |
| ENSP0000338570 | ENSG00000182534 | GURS   | 823  | 3    | 23 | 4  | 0.0001193 | 0.0001979 | 0.4502100  | 0.0402100 | 0.9804573 | 87   | 4 | 1 | 2 | 1 | 2 | 1 | 2 | 2 | 5 | 3 | 1 | 3 | 3 | 2 | 1 | 2 | 1 | 2 | 1 | 2 | 1 | 2 | 1 | 2 | 1 | 2 | 1 | 2 | 1 | 2 |   |   |
| ENSP0000338570 | ENSG00000182534 | GURS   | 823  | 3    | 23 | 4  | 0.0001193 | 0.0001979 | 0.4502100  | 0.0402100 | 0.9804573 | 87   | 4 | 1 | 2 | 1 | 2 | 1 | 2 | 2 | 5 | 3 | 1 | 3 | 3 | 2 | 1 | 2 | 1 | 2 | 1 | 2 | 1 | 2 | 1 | 2 | 1 | 2 | 1 | 2 | 1 | 2 |   |   |
| ENSP0000338570 | ENSG00000182534 | GURS   | 823  | 3    | 23 | 4  | 0.0001193 | 0.0001979 | 0.4502100  | 0.0402100 | 0.9804573 | 87   | 4 | 1 | 2 | 1 | 2 | 1 | 2 | 2 | 5 | 3 | 1 | 3 | 3 | 2 | 1 | 2 | 1 | 2 | 1 | 2 | 1 | 2 | 1 | 2 | 1 | 2 | 1 | 2 | 1 | 2 |   |   |
| ENSP0000338570 | ENSG00000182534 | GURS   | 823  | 3    | 23 | 4  | 0.0001193 | 0.0001979 | 0.4502100  | 0.0402100 | 0.9804573 | 87   | 4 | 1 | 2 | 1 | 2 | 1 | 2 | 2 | 5 | 3 | 1 | 3 | 3 | 2 | 1 | 2 | 1 | 2 | 1 | 2 | 1 | 2 | 1 | 2 | 1 | 2 | 1 | 2 | 1 | 2 |   |   |
| ENSP0000338570 | ENSG00000182534 | GURS   | 823  | 3    | 23 | 4  | 0.0001193 | 0.0001979 | 0.4502100  | 0.0402100 | 0.9804573 | 87   | 4 | 1 | 2 | 1 | 2 | 1 | 2 | 2 | 5 | 3 | 1 | 3 | 3 | 2 | 1 | 2 | 1 | 2 | 1 | 2 | 1 | 2 | 1 | 2 | 1 | 2 | 1 | 2 | 1 | 2 |   |   |
| ENSP0000338570 | ENSG00000182534 | GURS   | 823  | 3    | 23 | 4  | 0.0001193 | 0.0001979 | 0.4502100  | 0.0402100 | 0.9804573 | 87   | 4 | 1 | 2 | 1 | 2 | 1 | 2 | 2 | 5 | 3 | 1 | 3 | 3 | 2 | 1 | 2 | 1 | 2 | 1 | 2 | 1 | 2 | 1 | 2 | 1 | 2 | 1 | 2 | 1 | 2 |   |   |
| ENSP0000338570 | ENSG00000182534 | GURS   | 823  | 3    | 23 | 4  | 0.0001193 | 0.0001979 | 0.4502100  | 0.0402100 | 0.9804573 | 87   | 4 | 1 | 2 | 1 | 2 | 1 | 2 | 2 | 5 | 3 | 1 | 3 | 3 | 2 | 1 | 2 | 1 | 2 | 1 | 2 | 1 | 2 | 1 | 2 | 1 | 2 | 1 | 2 | 1 | 2 |   |   |
| ENSP0000338570 | ENSG00000182534 | GURS   | 823  | 3    | 23 | 4  | 0.0001193 | 0.0001979 | 0.4502100  | 0.0402100 | 0.9804573 | 87   | 4 | 1 | 2 | 1 | 2 | 1 | 2 | 2 | 5 | 3 | 1 | 3 | 3 | 2 | 1 | 2 | 1 | 2 | 1 | 2 | 1 | 2 | 1 | 2 | 1 | 2 | 1 | 2 | 1 | 2 |   |   |
| ENSP0000338570 | ENSG00000182534 | GURS   | 823  | 3    | 23 | 4  | 0.0001193 | 0.0001979 | 0.4502100  | 0.0402100 | 0.9804573 | 87   | 4 | 1 | 2 | 1 | 2 | 1 | 2 | 2 | 5 | 3 | 1 | 3 | 3 | 2 | 1 | 2 | 1 | 2 | 1 | 2 | 1 | 2 | 1 | 2 | 1 | 2 | 1 | 2 | 1 | 2 |   |   |
| ENSP0000338570 | ENSG00000182534 | GURS   | 823  | 3    | 23 | 4  | 0.0001193 | 0.0001979 | 0.4502100  | 0.0402100 | 0.9804573 | 87   | 4 | 1 | 2 | 1 | 2 | 1 | 2 | 2 | 5 | 3 | 1 | 3 | 3 | 2 | 1 | 2 | 1 | 2 | 1 | 2 | 1 | 2 | 1 | 2 | 1 | 2 | 1 | 2 | 1 | 2 |   |   |
| ENSP0000338570 | ENSG00000182534 | GURS   | 823  | 3    | 23 | 4  | 0.0001193 | 0.0001979 | 0.4502100  | 0.0402100 | 0.9804573 | 87   | 4 | 1 | 2 | 1 | 2 | 1 | 2 | 2 | 5 | 3 | 1 | 3 | 3 | 2 | 1 | 2 | 1 | 2 | 1 | 2 | 1 | 2 | 1 | 2 | 1 | 2 | 1 | 2 | 1 | 2 |   |   |
| ENSP0000338570 | ENSG00000182534 | GURS   | 823  | 3    | 23 | 4  |           |           |            |           |           |      |   |   |   |   |   |   |   |   |   |   |   |   |   |   |   |   |   |   |   |   |   |   |   |   |   |   |   |   |   |   |   |   |
