# Supplementary material
Source: PubMed Central journal article supplement (PMC3896054)
Supplement: NIHMS543571-supplement-6.pdf [file NIHMS543571-supplement-6.pdf]

[illegible]



























|                       |                  |         |      |     |     |          |           |           |           |           |           |           |           |     |    |    |    |    |    |    |    |    |    |    |    |    |    |    |    |    |    |    |    |   |   |
|-----------------------|------------------|---------|------|-----|-----|----------|-----------|-----------|-----------|-----------|-----------|-----------|-----------|-----|----|----|----|----|----|----|----|----|----|----|----|----|----|----|----|----|----|----|----|---|---|
| ENSP0000039259,25,ENS | ENSP000000166200 | CPD52   | 3441 | 1   | 63  | 10       | 9.64E-05  | 0.001242  | -3.65608E | 0.356771  | 0.695295  | 0.640104  | 1.8752051 | 73  | 5  | 3  | 4  | 4  | 3  | 2  | 1  | 3  | 2  | 2  | 4  | 2  | 2  | 1  | 6  | 3  | 3  | 5  |    |   |   |
| ENSP0000037129,54,ENS | ENSP000000159514 | SLC7A1  | 3771 | 1   | 63  | 10       | 9.64E-05  | 0.001242  | -3.65608E | 0.356771  | 0.695295  | 0.640104  | 1.8752051 | 73  | 0  | 3  | 0  | 3  | 2  | 1  | 4  | 3  | 1  | 4  | 3  | 2  | 6  | 1  | 2  | 2  | 5  | 5  |    |   |   |
| ENSP0000033754,94     | ENSP000000199964 | MF1     | 1432 | 1   | 145 | 23       | 0.002218  | 0.0002951 | -3.65691E | 0.250077  | 0.5518594 | 0.429925  | 0.705366  | 168 | 6  | 6  | 6  | 9  | 4  | 5  | 7  | 2  | 5  | 8  | 7  | 6  | 3  | 4  | 2  | 0  | 7  | 8  |    |   |   |
| ENSP0000036741        | ENSP000000199656 | HKX15   | 3494 | 1   | 467 | 74       | 0.007143  | 0.0000891 | -3.86361E | 0.000097  | 0.1232407 | 0.4709623 | 0.163846  | 541 | 15 | 16 | 22 | 15 | 16 | 13 | 20 | 21 | 20 | 17 | 22 | 18 | 12 | 14 | 20 | 11 | 0  | 27 | 20 |   |   |
| ENSP0000035742,10,ENS | ENSP000000199652 | MLC4    | 1918 | 1   | 101 | 16       | 0.000392  | 0.0000001 | -3.86361E | 0.000097  | 0.1232407 | 0.4709623 | 0.163846  | 541 | 76 | 36 | 40 | 40 | 68 | 42 | 49 | 51 | 56 | 60 | 52 | 78 | 39 | 10 | 50 | 99 | 73 | 13 | 40 |   |   |
| ENSP0000032275,15,ENS | ENSP000000172957 | MLC4    | 2211 | 1   | 101 | 16       | 0.000392  | 0.0000001 | -3.86361E | 0.000097  | 0.1232407 | 0.4709623 | 0.163846  | 541 | 76 | 36 | 40 | 40 | 68 | 42 | 49 | 51 | 56 | 60 | 52 | 78 | 39 | 10 | 50 | 99 | 73 | 13 | 40 |   |   |
| ENSP0000032792,42     | ENSP000000147892 | MLT9    | 2016 | 480 | 101 | 16       | 0.000345  | 0.0001987 | -3.86327E | 0.483180  | 0.744277  | 0.724991  | 0.4718647 | 117 | 5  | 1  | 4  | 6  | 5  | 4  | 2  | 4  | 5  | 2  | 3  | 1  | 2  | 4  | 7  | 6  | 7  | 4  | 3  |   |   |
| ENSP0000035317,17,ENS | ENSP000000176934 | XAB2    | 13   | 158 | 25  | 0.002417 | 0.0001005 | -3.86154E | 0.284392  | 0.5841921 | 0.387882  | 0.173083  | 183       | 10  | 5  | 8  | 4  | 3  | 2  | 4  | 5  | 1  | 6  | 4  | 5  | 10 | 7  | 6  | 7  | 7  | 5  | 6  | 3  | 7 |   |
| ENSP0000032647,3,ENS  | ENSP000000169139 | UBE2V2  | 2241 | 1   | 158 | 25       | 0.002417  | 0.0001005 | -3.86154E | 0.284392  | 0.5841921 | 0.387882  | 0.173083  | 183 | 10 | 5  | 8  | 4  | 3  | 2  | 4  | 5  | 1  | 6  | 4  | 5  | 10 | 7  | 6  | 7  | 7  | 5  | 6  | 3 | 7 |
| ENSP0000032929,29,ENS | ENSP000000176665 | ZMYM1   | 3748 | 1   | 791 | 191      | 0.001     | 3.73E-05  | -3.85847E | 0.000000  | 0.8822182 | 0.1245714 | 1.7320508 | 22  | 2  | 0  | 0  | 0  | 0  | 0  | 0  | 0  | 0  | 0  | 0  | 0  | 0  | 0  | 0  | 0  | 0  | 0  | 0  |   |   |
| ENSP0000030446,6,ENS  | ENSP000000170475 | BID     | 1917 | 268 | 57  | 9        | 8.72E-05  | 0.0001118 | -3.85847E | 0.5310118 | 0.773974  | 0.608014  | 1.7320508 | 22  | 2  | 3  | 3  | 2  | 2  | 2  | 1  | 2  | 3  | 1  | 2  | 2  | 3  | 1  | 2  | 2  | 2  | 1  | 5  | 2 | 2 |
| ENSP0000035322,12,ENS | ENSP000000115304 | CDYL    | 5045 | 1   | 19  | 3        | 2.91E-05  | 3.73E-05  | -3.85847E | 0.77397   | 0.91039   | 1.616107  | 0.0       | 22  | 1  | 0  | 1  | 0  | 0  | 0  | 0  | 2  | 1  | 0  | 0  | 0  | 0  | 0  | 0  | 0  | 0  | 0  | 0  | 0 | 0 |
| ENSP0000036274,27     | ENSP000000115466 | RABGAP1 | 5945 | 1   | 19  | 3        | 2.91E-05  | 3.73E-05  | -3.85847E | 0.77397   | 0.91039   | 1.616107  | 0.0       | 22  | 1  | 0  | 1  | 0  | 0  | 0  | 0  | 2  | 1  | 0  | 0  | 0  | 0  | 0  | 0  | 0  | 0  | 0  | 0  | 0 | 0 |
| ENSP0000032552,10,ENS | ENSP000000176665 | SLC12   | 5894 | 57  | 9   | 8.72E-05 | 0.0001118 | -3.85847E | 0.5310118 | 0.773974  | 0.608014  | 1.7320508 |           |     |    |    |    |    |    |    |    |    |    |    |    |    |    |    |    |    |    |    |    |   |   |







[illegible]





























[illegible]











[illegible]





[illegible]
